# Supplementary material for: Using transcriptomic and metabolomic data to investigate the molecular mechanisms that determine protein and oil contents during seed development in soybean
Source: Front Plant Sci. 2022 Sep 29;13:1012394. doi: 10.3389/fpls.2022.1012394 (PMC9557928; doi:10.3389/fpls.2022.1012394)
Supplement: Supplementary file 1 [file Table_1.xlsx]

## Sheet: Sheet1
Table S1.Relative abundance of the metabolites profiled.
Index	Formula	Compounds	Class I	Class II	NPS301-1-1	NPS301-1-2	NPS301-1-3	NPS301-2-1	NPS301-2-2	NPS301-2-3	NPS301-3-1	NPS301-3-2	NPS301-3-3	NPS301-4-1	NPS301-4-2	NPS301-4-3	NPS233-1-1	NPS233-1-2	NPS233-1-3	NPS233-2-1	NPS233-2-2	NPS233-2-3	NPS233-3-1	NPS233-3-2	NPS233-3-3	NPS233-4-1	NPS233-4-2	NPS233-4-3	mix01	mix02	mix03	cpd_ID	kegg_map
mah1618	C5H11N	Piperidine	Alkaloids	Alkaloids	25477000	24700000	21566000	14934000	14506000	13076000	11072000	9050100	8877000	11651000	8364900	8214300	26870000	24484000	24174000	10888000	9864500	10638000	11582000	13897000	13348000	9555700	8850300	9130900	19334000	16707000	16626000	C01746	ko00960
mah1528	C3H7NO2	L-Alanine	Amino acids and derivatives	Amino acids and derivatives	3344700	2136700	2445500	7271300	6182000	6288000	4705000	4276200	4560800	8739800	6064100	6461400	3069300	3151100	3087600	6461500	5444800	5452300	6697400	5810500	6984200	7878700	8581500	7285200	6853000	5890500	7028300	C00041	ko00250,ko00270,ko00430,ko00450,ko00710,ko00970,ko00998,ko01100,ko01110,ko01200,ko01230,ko02010,ko04122
mah1567	H3O4P	Phosphoric acid	Organic acids	Organic acids	1121300	880050	1254300	1183400	1194200	1229100	1050400	1114200	1593200	1414400	1489000	1718900	962090	896800	836850	1237000	1630100	1601400	1533600	1226500	1552800	1321200	1429700	1535000	1728200	1522500	1106200	--	--
mah1541	C4H7NO2	1-Aminocyclopropanecarboxylic acid	Amino acids and derivatives	Amino acids and derivatives	386720	362510	332070	186030	217790	279570	272580	351360	318100	406130	551240	446380	583060	494050	583000	229450	342350	336070	587730	604420	488480	1019700	761220	644930	464380	382180	457270	--	--
mah1489	C4H9NO2	N,N-Dimethylglycine	Amino acids and derivatives	Amino acids and derivatives	1516600	1491500	2036800	1870200	1862600	2235500	1803900	1887700	1895700	3204600	3643700	2210600	2762700	2145200	2649500	2590200	2162900	1950300	1621100	1595300	1903000	4053200	3171800	2281000	2143500	2001700	2190600	C01026	ko00260,ko01100
mah1487	C4H9NO2	2-Aminoisobutyric acid	Amino acids and derivatives	Amino acids and derivatives	1377000	1278700	1351200	1886600	2013600	2107800	1795000	1913900	1714600	1509800	1698100	1602200	1479800	1499100	1215200	2324500	2297200	2449900	1928400	2037100	1804000	1528700	1694500	1692500	1959700	1814400	1852300	C03665	--
mah1494	C4H9NO2	γ-aminobutyric acid	Organic acids	Organic acids	1073600	1141100	1733900	1276800	1719200	1520800	1156000	1075100	1265700	2834000	3262400	2053400	2379400	1811300	2327400	2369800	1663500	1565900	986930	1030800	1100900	2775900	2754500	2045900	1751000	1629600	1774100	C00334	ko00250,ko00330,ko00410,ko00650,ko00760,ko01100
mah1488	C5H13NO	Choline	Alkaloids	Alkaloids	299340	309360	328730	470840	511080	526540	450610	451460	435160	386620	332800	394170	384910	372830	311160	598780	579980	621210	493180	457290	499380	450500	373540	392150	493320	406600	485090	C00114	ko00260,ko00564,ko01100,ko02010
mah1503	C3H7NO3	L-Serine	Amino acids and derivatives	Amino acids and derivatives	2758500	2547600	2611200	1020300	1173500	1146400	896370	820980	850570	957070	972970	1039500	3411800	2548300	3276100	1184000	906100	881410	967110	1044400	908720	1064200	1059800	989270	1339200	1332400	1351900	C00065	ko00260,ko00261,ko00270,ko00460,ko00600,ko00630,ko00920,ko00970,ko01100,ko01110,ko01200,ko01230,ko02010
mah1524	C4H5N3O	Cytosine	Nucleotides and derivatives	Nucleotides and derivatives	201990	327660	184900	2223200	1708600	3106200	4496000	3223800	2961200	2914900	4718700	4189100	404380	490780	170730	1379900	2464100	1498000	2310000	3075000	2054200	4553200	2226100	1979800	2277800	2366200	1943900	C00380	ko00240,ko01100
mah1460	C5H9N3	Histamine	Amino acids and derivatives	Amino acids and derivatives	81169	30774	56543	1477600	1282200	1329100	738830	954810	447220	320110	222700	191600	73450	34807	37083	1342600	1849300	1585600	874670	903970	813890	225290	279900	403650	652150	586130	526330	C00388	ko00340,ko01100,ko01110
mah1624	C4H4N2O2	Uracil	Nucleotides and derivatives	Nucleotides and derivatives	1045400	1010900	1253900	561070	962900	654910	744360	696070	621760	533180	759030	405840	1258600	1252800	996720	607450	642680	412390	622310	685000	388040	782280	762970	420180	866400	864250	832550	C00106	ko00240,ko00410,ko00770,ko01100
mah1430	C4H7N3O	Creatinine	Organic acids	Organic acids	12602	14442	12290	11834	12996	14584	16331	17029	15051	11071	13377	12045	12621	16293	12817	9138.8	14607	14267	13779	13852	12810	13950	16649	15138	16846	16630	14063	C00791	ko00330,ko01100
mah1514	C5H9NO2	L-Proline	Amino acids and derivatives	Amino acids and derivatives	1650200	1487100	1700800	1269600	1256300	1224300	1286800	1212300	1163700	1143400	1095900	1043000	3028600	3213800	2393900	1825400	1768600	1643700	1910000	2021400	1749500	1484600	1304800	1022600	1647100	1697900	1532000	C00148	ko00330,ko00332,ko00970,ko01100,ko01110,ko01230,ko02010
mah1935	C8H7N	Indole	Alkaloids	Plumerane	6972.5	12093	13013	44705	75182	59472	11622	39941	27858	30226	21374	13959	40923	11169	85232	91144	83633	227420	46173	35275	41642	20405	24102	13679	59485	55879	45457	C00463	ko00380,ko00400,ko00402,ko01100,ko01110
mah1553	C5H11NO2	L-Valine	Amino acids and derivatives	Amino acids and derivatives	30710000	31576000	29519000	27256000	26380000	23222000	18061000	17875000	14548000	15455000	12077000	10559000	36624000	40229000	45716000	25920000	23516000	24019000	27927000	27416000	23093000	15764000	14869000	15654000	26212000	23308000	27486000	C00183	ko00280,ko00290,ko00311,ko00460,ko00770,ko00966,ko00970,ko01100,ko01110,ko01210,ko01230,ko02010
mah1511	C5H11NO2	Betaine	Alkaloids	Alkaloids	2710000	2755300	2111100	3610000	2980900	4356700	3880500	3632900	3623200	3377500	3296000	3197500	3242700	3408200	3162700	3018500	2697800	3252600	3450900	3291700	4791400	4319000	4144300	2259600	3393500	3213000	3637100	C00719	ko00260,ko01100,ko02010
mah0263	C4H6O4	Succinic acid	Organic acids	Organic acids	3676900	4349200	3826600	9500900	8519000	7744600	7378300	7486800	6348500	4156800	3590000	3189100	3496600	4852300	4429000	9237900	7643700	8460100	7108100	7031200	4093200	3479600	3458300	3120500	5615500	5776400	5555300	C00042	ko00020,ko00190,ko00250,ko00310,ko00350,ko00360,ko00620,ko00630,ko00640,ko00650,ko00760,ko00920,ko01100,ko01110,ko01200
mah0267	C4H6O4	Methylmalonic acid	Organic acids	Organic acids	3885500	3748900	3906700	9392200	8271200	8105600	7078000	7552800	5826300	4003000	3822800	3668300	4020800	5086800	4458300	9151500	8198600	7758800	6742900	7264000	4482100	3877600	3831300	3201700	5641400	5600900	5383700	C02170	ko00240,ko00280,ko00640,ko01100
mah0364	C5H10O3	3-Hydroxy-3-methyl butyric acid	Organic acids	Organic acids	328410	550840	433510	398900	405340	406810	269800	197270	250300	240360	236550	295830	695240	564290	467620	481080	445320	466370	259490	324710	221940	164930	205190	167020	363160	415460	349290	--	--
mah0265	C3H5NO4	Aminomalonic acid	Organic acids	Organic acids	4345300	5018000	4611700	10580000	10018000	9492900	8589800	8813600	6930200	4385500	4885400	4405800	4326300	6035100	4971300	10754000	9666200	8968100	7081800	8070700	4829900	4055100	4067400	3929800	6330500	6131200	6576900	C00872	--
mah1781	C8H9N	N-Benzylmethylene isomethylamine	Alkaloids	Alkaloids	111700	132260	121260	99783	203040	173640	126910	139910	108360	114790	86538	86532	253510	145860	234780	188660	248720	357770	153220	133720	140640	96950	99705	106640	151870	154100	152650	--	--
mah1772	C7H7NO	Benzamide	Others	Others	30360	29572	19774	32032	48155	53566	34628	30038	20780	21591	30583	20547	71337	47898	53478	20632	49213	82636	30179	48155	39699	23057	14720	22400	37543	35672	36548	C09815	--
mah0004	C3H7NO2S	L-Cysteine	Amino acids and derivatives	Amino acids and derivatives	206620	214270	199910	202260	206740	205320	171820	195040	199190	193850	194770	236420	207840	209950	195600	200860	212170	214770	251260	237750	165500	209210	195590	236350	195790	215630	186610	C00097	ko00260,ko00270,ko00311,ko00332,ko00430,ko00460,ko00480,ko00730,ko00770,ko00920,ko00970,ko01100,ko01110,ko01200,ko01230,ko04122
mah1865	C8H11N	Phenethylamine	Others	Others	230940	192340	191880	93100	148310	91501	68683	49450	22157	9	9	9	367240	204360	460460	107310	98896	337340	9	9	294140	9	16651	9	156070	122880	136000	C05332	ko00360,ko01100
mah2308	C7H6O2	4-Hydroxybenzaldehyde	Phenolic acids	Phenolic acids	758420	585010	1040600	346500	304560	262120	330680	196940	284600	160890	141090	124220	505470	367970	427020	140210	113260	127450	85138	57546	58597	79415	62798	59009	335990	365720	390640	C00633	ko01100
mah0175	C4H10O4	DL-threitol	Others	Saccharides and Alcohols	9	9	9	170190	195060	356170	195920	323440	252900	399620	289700	320560	9	9	9	126870	265800	181390	251880	184100	282960	365300	325320	359890	154510	112240	102640	--	--
mah1686	C6H6N2O	Niacinamide	Others	Vitamin	1023700	1073100	801900	69742	102400	65458	60288	59670	39954	37228	53878	45274	1306700	1176900	1235700	394520	428550	384910	58845	89570	78249	76782	73262	76022	177720	172400	191380	C00153	ko00760,ko01100
mah0216	C6H5NO2	Nicotinic acid	Others	Vitamin	170150	139380	205840	189760	185220	154330	146020	148860	100720	132970	140370	183570	110280	100590	66098	138840	160450	186190	159320	180200	131320	110640	97570	99069	150270	177140	162180	C00253	ko00760,ko00960,ko01100,ko01110
mah1603	C5H7N3O	5-Methylcytosine	Nucleotides and derivatives	Nucleotides and derivatives	6893.5	21959	16674	40555	76490	90418	61302	80658	44782	36042	34351	40692	12242	17956	31726	72716	82460	107000	38297	64984	46433	52548	33312	24525	25184	31746	45102	C02376	ko00240,ko01100
mah2030	C6H6O3	Maltol	Others	Others	336070	255700	222020	132820	217810	105900	188310	139620	124560	9	9	9	198630	162650	261190	155250	131120	234910	56824	121690	62705	9	9	47949	197470	150950	176200	C11918	ko00523,ko01110
mah1523	C6H6O3	5-Hydroxymethylfurfural	Phenolic acids	Phenolic acids	518090	755340	1123200	521290	597630	610590	690700	660020	678480	832060	993330	795510	516620	588480	729640	515990	415610	418490	533490	559470	581990	679630	694680	598230	462600	394910	605620	C11101	--
mah1700	C5H6N2O2	Thymine	Nucleotides and derivatives	Nucleotides and derivatives	95786	46586	51784	61771	76732	53170	59085	47638	22623	9455.8	9	9	75018	45968	63958	38480	23798	57635	11364	11017	11017	10716	9	9	35541	37430	37811	C00178	ko00240,ko01100
mah1574	C5H7NO3	5-oxoproline	Amino acids and derivatives	Amino acids and derivatives	5933000	3569400	4271900	2004400	2275400	2522900	1953800	2537300	3821600	4221100	7835000	10155000	7696900	5712700	2549300	1714700	1500500	1631400	2760600	2811000	4447400	3442800	3699300	3414500	4693400	4252500	4094600	C01879	ko00480,ko01100
mah1542	C6H11NO2	Pipecolic acid	Amino acids and derivatives	Amino acids and derivatives	13360000	9087100	8631000	5395900	5993400	7441900	6401200	9836900	12614000	13046000	17793000	19914000	11738000	7143100	4140000	4841400	5045600	4908600	7437400	9348500	9135200	9323100	9028500	7315600	8633400	9286500	8003900	--	--
mah1570	C5H9NO3	cis-4-Hydroxy-D-proline	Amino acids and derivatives	Amino acids and derivatives	1221000	1475200	1294500	802730	825980	760540	644230	562170	614990	594070	470090	376730	1366000	1147300	1325000	569900	492250	578100	692540	775060	737640	423230	477950	501920	808430	889290	955040	C03440	ko00330,ko01100
mah0168	C4H9N3O2	Creatine	Organic acids	Organic acids	552390	668980	676300	905020	1012300	1517700	1385200	1542600	1327200	2139600	1269800	1302700	1101200	1129500	1190100	2116800	2523900	2239800	999590	969060	816050	1132600	1309800	1100400	1401900	1501500	1282300	C00300	ko00260,ko00330,ko01100
mah1619	C6H13NO2	L-Leucine	Amino acids and derivatives	Amino acids and derivatives	10408000	9723700	8355000	4970400	5621300	5118700	3822000	3834800	3839000	3650100	2881600	2855100	10738000	9027100	9177100	3973700	3492000	3727700	4261500	5265500	4815600	3301300	2825800	3287400	7020700	6957300	6290500	C00123	ko00280,ko00290,ko00966,ko00970,ko01100,ko01110,ko01210,ko01230,ko02010
mah1617	C6H13NO2	L-Isoleucine	Amino acids and derivatives	Amino acids and derivatives	8900600	8176900	6806500	4636200	4465700	4656800	3681400	3128400	3284500	3766300	2483700	2599600	8371000	7190500	7173900	3640800	3102000	3648300	4129700	5294400	4576800	3122900	2931800	2839100	5322700	5899300	5480200	C00407	ko00280,ko00290,ko00460,ko00960,ko00966,ko00970,ko01100,ko01110,ko01210,ko01230,ko02010
mah0399	C5H8O4	2-Methylsuccinic acid	Organic acids	Organic acids	2579500	2291000	2425800	20618000	17479000	22237000	23068000	18668000	18404000	8188000	5265200	8637200	3105000	2966100	2940100	9665900	13742000	14718000	6944900	10609000	9832900	5625200	6133100	5917700	11971000	10625000	9692800	--	--
mah1534	C4H8N2O3	L-Asparagine Anhydrous	Amino acids and derivatives	Amino acids and derivatives	395380	396320	318410	61684	97679	112560	132220	148820	121750	169610	174280	168360	348490	319700	356230	54525	62060	46233	113250	119940	195420	196980	184630	168090	137490	142790	203990	C00152	ko00250,ko00460,ko00970,ko01100,ko01110,ko01230
mah1538	C4H8N2O3	L-Asparagine	Amino acids and derivatives	Amino acids and derivatives	6430900	6949400	5171700	1242300	1848000	1652200	1877700	1960800	1752100	2596100	2359000	2652400	5382900	5751600	4903700	921980	865840	465670	1912800	1505500	1618900	3647700	3065200	3141200	3100400	2259300	2916100	C00152	ko00250,ko00460,ko00970,ko01100,ko01110,ko01230
mah0566	C6H12O3	5-hydroxyhexanoic acid	Organic acids	Organic acids	69235	41650	39308	73704	124990	50280	36476	36008	32715	58796	99638	37334	35852	35423	23524	58163	50942	37758	24840	30715	22052	34368	47605	41487	56870	39543	30286	--	--
mah0755	C6H12O3	2-Hydroxyisocaproic acid	Organic acids	Organic acids	11391	17068	14338	43778	44282	20705	42177	35355	33880	33812	17376	24139	19387	16887	20977	101530	143630	148600	85796	60019	67827	27596	33599	25704	57763	53174	57556	--	--
mah1536	C5H12N2O2	L(+)-Ornithine	Amino acids and derivatives	Amino acids and derivatives	4811700	4348500	3763100	1002300	1186600	1035000	1217400	1168800	1306300	1790600	1596600	1906200	4062300	3928400	4149000	514550	536420	412760	771920	1050700	1449900	2029800	2000700	1936100	1788100	1699000	1616300	C00077	ko00220,ko00330,ko00472,ko00480,ko01100,ko01110,ko01210,ko01230,ko02010
mah1556	C4H7NO4	Aspartic acid	Amino acids and derivatives	Amino acids and derivatives	5346000	4733300	4750500	2685800	3127400	3269900	2529800	2626600	2971700	3794700	4094600	4401100	4592900	4242700	4383800	2255100	2855800	3085800	2842000	3162400	3970900	5739200	4676700	4907000	3908800	4245600	3651600	C16433	--
mah0141	C4H6O5	L(-)-Malic acid	Organic acids	Organic acids	3999700	3773400	4850600	13352000	12200000	12453000	16040000	12943000	13804000	12968000	13732000	12308000	6503300	5933600	5394400	12875000	11299000	11942000	10423000	10772000	10217000	11755000	11766000	14170000	10561000	9754000	10464000	C00497	ko00650,ko01100
mah1591	C4H9NO2S	DL-Homocysteine	Amino acids and derivatives	Amino acids and derivatives	15790	15158	23638	78988	63542	51408	42984	37812	42756	43194	30914	28877	46666	16810	45147	43351	42720	31200	50588	60815	63716	32188	40368	30559	45029	39451	47857	C05330	--
mah0221	C5H5N5	Adenine	Nucleotides and derivatives	Nucleotides and derivatives	49616	80659	94690	146410	138170	124360	83524	88457	53798	49505	50254	26716	135780	165290	100900	120910	105890	84274	51126	77284	44725	34941	34710	18638	84814	83468	95266	C00147	ko00230,ko00908,ko01100
mah1739	C5H5N5	Aminopurine	Alkaloids	Alkaloids	430900	615360	523510	97023	117460	93947	198810	107070	206880	141420	309620	164360	460040	391980	453750	73150	64588	74050	71282	79236	69811	187490	191430	102440	251480	261960	177910	--	--
mah1613	C5H4N4O	Hypoxanthine	Nucleotides and derivatives	Nucleotides and derivatives	70952	88302	118020	91432	107660	95532	116170	75558	65392	40439	67712	37993	155680	167600	123930	84778	71218	70767	45282	56536	43169	65034	30137	46275	107780	84469	84483	C00262	ko00230,ko01100
mah2116	C7H7NO2	p-Aminobenzoate	Phenolic acids	Phenolic acids	31053	9	51028	270220	262700	184700	131880	194570	87484	111610	61909	44437	131680	77780	51466	359320	864730	344710	559930	627480	391730	72746	107940	97846	182060	139610	178180	C00568	ko00790,ko01100
mah1520	C7H7NO2	Trigonelline	Alkaloids	Alkaloids	4872400	4836300	6323800	4021800	4050500	4229500	4350200	5128900	5605600	7504500	7744500	7911200	5720000	5962600	6400800	3358500	3497700	3889500	3753700	3782500	4866900	8769400	8626800	5761900	4916900	4708200	5053100	C01004	ko00760
mah2309	C7H7NO2	Nicotinic Acid Methyl Ester (Methyl Nicotinate)	Alkaloids	Alkaloids	251390	240110	383200	123850	136440	106500	94262	61302	63814	48065	54478	39389	67698	50939	79124	176230	146200	171150	54836	60988	44711	35916	30860	32898	180950	166210	153700	--	--
mah2112	C7H7NO2	4-Aminobenzoic acid	Phenolic acids	Phenolic acids	8907400	17865000	12162000	2190500	2409500	1956100	519450	613060	305100	121570	53264	65672	9080100	12069000	7287100	10288000	7296800	5767300	935370	721180	240570	21968	31121	48384	6617200	4606200	5481600	--	--
mah1516	C7H9N2O	3-Carbamyl-1-methylpyridinium (1-Methylnicotinamide)	Others	Others	26824	46872	50915	21406	24713	27395	24764	39905	28368	60348	62409	60338	31466	32806	34114	29350	28549	25111	31932	13785	33630	59220	54505	40482	38934	38292	24707	C02918	ko00760,ko01100
mah1614	C8H11NO	Hydroxyphenethylamine	Others	Others	34444	49044	38314	39280	70518	31486	45277	34055	38930	43494	37298	28240	75975	38728	37409	28879	9	9	15417	31405	23250	28144	32106	11259	37070	22809	40840	--	--
mah2205	C7H6O3	4-Hydroxybenzoic acid	Phenolic acids	Phenolic acids	50772	58706	37002	14814	43787	31788	29758	25421	23364	12792	19838	24939	114710	89739	70578	32899	18303	27729	20420	10675	13935	35040	29360	5728.2	31588	36787	42030	C00156	ko00130,ko00790,ko01100,ko01110
mah0575	C8H10O2	Tyrosol	Phenolic acids	Phenolic acids	9	9	9	27144	26212	24519	21484	25808	8225.5	23582	20728	12849	9	9	9	31721	29330	31656	30076	20232	18935	18671	7931	19372	19167	8580.5	14584	--	--
mah1427	C6H5NO3	4-Nitrophenol	Others	Others	1387600	1643700	1381600	1229200	1220700	1263700	1292000	1117800	931180	970860	843160	735190	2152900	2351500	2217100	1098300	987290	1311400	928970	1064300	1116800	1258600	1220600	1098700	1239500	1044400	1147600	C00870	--
mah0079	C2H8NO4P	O-Phosphorylethanolamine	Others	Others	27386	35692	11066	41082	72801	87458	47596	71286	44515	143120	90556	101150	50508	25003	32313	141940	194720	255170	46768	73538	103150	172860	58498	116040	97302	103940	61129	--	--
mah1447	C6H11N3O	Histidinol	Others	Others	18187000	18748000	19633000	15564000	16536000	15862000	17079000	16078000	15640000	15741000	15222000	17029000	18055000	18191000	18160000	16668000	16240000	16880000	15076000	15071000	15150000	15183000	14180000	15205000	17450000	17005000	16799000	C00860	ko00340,ko01100,ko01110,ko01230
mah1995	C6H9NOS	4-Methyl-5-thiazoleethanol	Others	Others	117100	73317	119580	90381	65815	112930	82818	92027	62976	20247	15552	15523	95992	60229	89219	130870	139270	170830	52588	56764	72775	36630	30026	20809	81835	71551	69070	C04294	ko00730,ko01100
mah1708	C6H11NO3	4-Acetamidobutyric acid	Organic acids	Organic acids	190580	178000	160970	9	9	9	9	9	9	88054	99396	79708	9	9	9	9	9	9	9	9	9	90809	95966	9	98016	69261	83407	--	--
mah1444	C6H11NO3	4-Acetamidobutyric Acid	Amino acids and derivatives	Amino acids and derivatives	77138	87446	78779	66607	67786	75028	79017	84574	84606	71881	62704	69388	70779	74031	85137	64703	63062	55601	72155	73496	71594	54214	63520	63136	81543	84316	71037	--	--
mah1530	C5H11N3O2	4-Guanidinobutyric acid	Organic acids	Organic acids	1056500	989810	954740	1609900	1729000	1663400	1530900	1654600	1134300	918370	899750	1128700	1288000	955070	1133600	1693300	2023400	2654000	1168100	1335000	1570200	1753200	1199100	1133100	1436500	1440300	1421700	C01035	ko00330,ko01100
mah0212	C5H6O5	A-Ketoglutaric acid	Organic acids	Organic acids	3499700	2703000	3433200	1933400	1551200	1190400	1196600	1277000	1370200	1492300	1264700	1821500	4933700	3849800	3462400	3103000	2902600	3663500	1232000	1265200	1284400	1196900	1288200	1266900	2429400	1742400	1831600	--	--
mah0506	C6H10O4	2,3-dimethylsuccinic acid	Amino acids and derivatives	Amino acids and derivatives	721910	1164900	807600	672570	1210500	652290	430550	544990	347230	266540	243390	96502	529570	636320	344380	1000900	846680	903310	429560	538780	112470	242050	215380	229670	669440	621070	465930	--	--
mah0505	C6H10O4	2-Methylglutaric acid	Organic acids	Organic acids	846690	811680	599210	441710	679230	497620	164230	249500	239370	174130	94849	81221	585630	509710	263220	859040	744920	554440	217610	456590	365280	260490	78851	192210	352800	267390	426220	--	--
mah0507	C6H10O4	Adipic acid	Organic acids	Organic acids	885580	997680	972540	1141300	1114900	971830	507640	599740	404650	239980	161190	127350	835300	676820	467890	1158600	903160	753300	380790	529760	161140	376080	333840	172240	799440	738120	644870	C06104	ko01100
mah0091	C5H10N2O3	L-Glutamine	Amino acids and derivatives	Amino acids and derivatives	3127000	1270400	1895600	5211600	5344800	3811200	3306700	2586800	3002800	2420500	1323300	1237200	1335600	1576500	624180	8621900	7944700	8114900	4181100	3287300	2148700	1236800	1332200	1601700	3633300	3073600	3646600	C00064	ko00220,ko00230,ko00240,ko00250,ko00630,ko00750,ko00910,ko00970,ko01100,ko01230,ko02010
mah1458	C6H14N2O2	L-(+)-Lysine	Amino acids and derivatives	Amino acids and derivatives	951370	469520	996640	6491300	7914300	7436000	5705500	7017800	6868300	5433000	4296400	4018700	794680	706050	332130	9419700	10993000	9657300	9720200	8119900	7279600	5923200	5148900	5809000	5041200	4841700	4832900	C00047	ko00300,ko00310,ko00780,ko00960,ko00970,ko01100,ko01110,ko01210,ko01230,ko02010
mah1546	C7H16NO2	Acetylcholine	Alkaloids	Alkaloids	252490	173000	254760	336040	364330	341700	403150	336250	482420	765560	1136800	911580	254620	189790	153080	347800	280280	423330	426490	382780	448430	993630	801690	718930	452120	403850	318270	C08201	--
mah0086	C5H9NO4	Glutamic acid	Amino acids and derivatives	Amino acids and derivatives	215430	120280	117340	302340	354630	320210	458550	510680	577220	628790	460680	608190	148820	161010	121110	409440	361590	290510	600200	525090	523080	375670	455430	543480	399740	382920	474960	--	--
mah2979	C8H4O3	Phthalic anhydride	Phenolic acids	Phenolic acids	71710	76159	69200	69515	62026	57617	87528	66764	61236	55721	63682	64413	64998	70049	68114	74164	59495	85331	55027	76520	54263	64042	57781	55010	67599	57623	56170	--	--
mah0172	C5H8O5	Citramalate	Organic acids	Organic acids	1085900	1507800	1283800	3797500	3208400	3317200	3335200	3192000	2419300	1506700	1901300	1854500	729220	1051300	885140	2876000	2651800	3346100	4550800	3903800	3075400	1397900	1437600	1185000	3316500	2525500	2209500	C00815	--
mah1580	C5H11NO2S	DL-Methionine	Amino acids and derivatives	Amino acids and derivatives	3220800	2693400	2876600	14064000	13532000	12334000	9789300	8487400	9000100	7649600	4950100	5201200	3647100	4424500	2932200	18206000	16895000	14463000	17031000	17169000	15117000	8827200	6894500	8970400	13638000	11385000	11595000	--	--
mah0097	C5H10O5	DL-Arabinose	Others	Saccharides and Alcohols	3372200	2917100	3033500	395060	461080	482480	474020	591120	527330	369530	236170	327340	1700900	2252700	2820600	326250	471190	504440	279830	318490	199380	188660	156300	240700	1068000	923570	991220	--	--
mah0281	C5H5N5O	Guanine	Nucleotides and derivatives	Nucleotides and derivatives	7534.2	10268	25707	122600	94428	108290	35085	42196	14267	12341	4757.2	5562	34722	21372	17468	79878	81270	62427	38811	34452	16698	16745	789.59	4752.5	39742	38253	37904	C00242	ko00230,ko01100
mah1558	C5H5N5O	2-Hydroxy-6-aminopurine	Nucleotides and derivatives	Nucleotides and derivatives	347540	371500	509730	3115800	2627200	2303700	1706300	1679600	1498600	1158200	734870	594270	430190	519380	424850	3636500	3547400	3436600	3449100	2714700	2363400	1560900	916100	1082900	1675300	1460000	1673800	--	--
mah0200	C5H4N4O2	Xanthine	Nucleotides and derivatives	Nucleotides and derivatives	204870	371430	329220	195340	289110	268120	90114	84290	91168	84416	48501	58421	404890	273280	295180	976720	485500	461140	120300	172030	80428	95876	34251	36488	209380	295470	328190	C00385	ko00230,ko00232,ko01100,ko01110
mah2431	C8H8O3	2-Methoxybenzoic acid	Organic acids	Organic acids	39550	58002	126480	182770	160700	157570	136750	114530	100860	87200	67849	58522	121130	166630	113420	938680	577120	520070	294540	338040	162470	86337	108800	103890	211620	205700	211100	--	--
mah2194	C8H8O3	o-Anisic acid	Phenolic acids	Phenolic acids	67660	58088	38442	256140	225840	188470	53229	58939	31603	14107	9	9	68231	81010	28183	893430	609070	606340	88226	98260	27362	9	9	9	197780	123350	157940	--	--
mah1461	C6H9N3O2	L-Histidine	Amino acids and derivatives	Amino acids and derivatives	2942300	1718900	2621600	29757000	28301000	30087000	23465000	24888000	18016000	14336000	10461000	9615500	2120600	2516600	1762600	29429000	33848000	32818000	24113000	23895000	23570000	10375000	11617000	13729000	19043000	17873000	16609000	C00135	ko00340,ko00410,ko00970,ko01100,ko01110,ko01230,ko02010
mah1931	C10H8N2	3-Indoleacetonitrile	Alkaloids	Plumerane	80878	77186	115250	581820	783330	769140	474270	456100	393210	481540	331750	320830	461250	105070	1000400	1145100	1252800	1852100	630870	505690	615940	580350	230820	388700	780340	701060	879500	C02938	ko00380,ko01100
mah0215	C5H4N2O4	Orotic acid	Others	Vitamin	17086	16238	35294	372230	388180	259740	161680	172050	176790	165290	135920	155300	33509	40282	22188	160450	181840	236650	151590	197620	130150	174480	191820	303760	156380	210160	169140	C00295	ko00240,ko01100
mah1242	C10H22O	1-Decanol	Others	Saccharides and Alcohols	3247200	2344800	1558800	2584700	1893600	2095400	2425600	1936500	2444200	2018600	2262000	1707100	2015500	2015400	2385900	2515100	2462600	1971400	1651400	2019400	1926100	1722300	1932000	1471500	2167200	2043100	2050300	C01633	--
mah2705	C10H8O2	6-MethylCoumarin	Lignans and Coumarins	Coumarins	11244	7411.4	6776.1	14736	12516	11898	8529.8	10967	6326.9	5333.8	4049.6	6624.6	10259	12911	10236	10449	11123	11766	14814	11935	17897	15182	10147	7778.3	12237	7710.7	12120	--	--
mah2039	C10H12N2	L-Tryptamine	Alkaloids	Alkaloids	9	21996	20165	16626	31800	25538	6432.8	9771.8	7760.8	9	9	9	49470	9984.5	82217	43266	52622	143480	9	9	9237.8	9	9	9	25464	23774	28394	C00398	ko00380,ko00901,ko01100,ko01110
mah1723	C6H11NO2S	S-Allyl-L-cysteine	Amino acids and derivatives	Amino acids and derivatives	9	9	9	165630	155590	147750	74651	85083	119330	101070	126990	89873	9	9	9	90152	125100	92928	101690	86809	73001	126370	97250	52055	119430	45396	73373	C16759	--
mah1526	C6H11NO4	DL-2-Aminoadipic acid	Alkaloids	Alkaloids	20995000	7257300	17464000	4228900	6073200	5988000	6634900	6575400	9370900	18162000	20449000	18630000	9359500	13913000	7543000	3775500	2791200	3030300	5840300	5632000	8262400	12428000	13079000	11527000	8537900	8115100	8871800	--	--
mah0080	C5H6O6	4-Hydroxy-2-oxoglutaric acid	Organic acids	Organic acids	85262	129360	112940	179650	200960	220290	97546	146770	101400	73972	99858	60829	104090	98672	76011	110070	97639	111240	137770	106680	86506	55717	49925	45757	90229	168860	127080	C01127	ko00630,ko01100
mah0272	C6H10O5	3-Hydroxy-3-methylpentane-1,5-dioic acid	Amino acids and derivatives	Amino acids and derivatives	4956200	8581500	6428600	2193600	3425400	3493000	2030600	2876100	1943100	1531300	1055000	1447300	11719000	7943200	10164000	6209000	5812300	6931700	3204600	3224800	2174600	1761500	1754100	1538100	4284100	5256800	6172900	C03761	--
mah1425	C7H15NO3	L-Carnitine	Alkaloids	Alkaloids	73051	78793	60656	65541	54602	71608	75668	61456	62592	56571	66488	58574	72861	71297	82449	65469	62718	62001	57408	64784	64992	68819	69120	67953	76821	70851	87618	C00318	--
mah1730	C6H14ClNO2S	L-Methionine methyl ester	Amino acids and derivatives	Amino acids and derivatives	60692	99966	106320	274730	246250	219000	202940	167680	194220	108320	83620	94962	78439	72648	86498	305510	299660	306800	311220	237160	210870	128830	105530	107750	185030	168920	198510	--	--
mah0072	C5H9NO5	4-Hydroxy-L-glutamic acid	Amino acids and derivatives	Amino acids and derivatives	8291.8	7607.8	6560.5	22377	21055	16616	32469	20358	49064	26300	29331	21460	4833.5	6558.2	5518.8	36623	53872	28003	40023	57294	34597	18773	31924	25161	26213	33162	31771	C03079	--
mah0152	C6H12O5	1,5-Anhydro-D-glucitol	Others	Saccharides and Alcohols	264880	349320	270080	318100	306260	302740	259860	252780	254170	224190	195640	142160	320440	256040	258570	338080	367430	259810	242970	197370	199970	199920	251240	175600	205450	304610	267690	C07326	--
mah2686	C9H8O3	Caffeic aldehyde	Phenolic acids	Phenolic acids	24968	30572	12120	9	9	9	9	9	9	9	9	9	90060	39566	46397	5681.3	9	9	9	9	9	9	9	9	11483	12440	11804	C10945	ko00940,ko01110
mah1773	C9H11NO2	L-Phenylalanine	Amino acids and derivatives	Amino acids and derivatives	442350	711590	684800	581140	978130	782540	571400	516200	529220	561370	407260	361310	1273000	788040	1221900	709130	1093600	1579700	787160	734840	708560	386640	410770	405020	823160	702790	804290	C00079	ko00360,ko00400,ko00460,ko00940,ko00960,ko00966,ko00970,ko00998,ko01100,ko01110,ko01210,ko01230,ko02010
mah0627	C8H6O4	Terephthalic acid	Phenolic acids	Phenolic acids	912980	1023700	1454400	8347500	9035500	9136900	5262300	7343800	7382000	5453700	3306300	2632900	2401500	2188500	1555800	5777600	9098600	9182200	6728900	9814400	7047700	3670900	2282300	3449300	4964400	5861900	5071000	C06337	ko01100
mah2137	C8H6O4	Phthalic acid	Organic acids	Organic acids	42120	54532	25598	185340	218960	290960	230760	252370	218080	175060	133320	123220	59244	61930	51160	103430	245210	164250	258860	352890	272740	129130	137570	143870	160400	172290	160190	C01606	ko01100,ko02010
mah0087	C5H10O6	D-Xylonic acid	Organic acids	Organic acids	6292000	4443400	5785900	5483400	6375800	5674400	4159100	6156400	3433700	3738900	2869700	2952100	7800000	6245000	6659800	9519100	10265000	12563000	5830900	4380100	3245800	2639500	2615200	2882400	6098300	5053000	6643600	--	--
mah1776	C6H6N4S	6-Methylmercaptopurine	Nucleotides and derivatives	Nucleotides and derivatives	6489600	7608600	7354400	6743500	10290000	8606300	7029500	6172400	5898600	6743400	4484000	4193500	13815000	10048000	13073000	9970800	12392000	17605000	9679500	9590200	7702400	4642000	4872900	4057300	9414800	8717600	9455200	C16614	--
mah0405	C8H8O4	3,4-Dihydroxybenzeneacetic acid	Phenolic acids	Phenolic acids	104970	138670	203570	24994	36332	21991	17657	7662.4	23755	38130	31058	32204	240000	141430	141470	115690	50609	110750	20970	16431	18493	21593	22477	10999	86158	99907	99625	--	--
mah1608	C8H11NO3	Pyridoxine	Others	Vitamin	614130	450230	431080	1877400	1858700	2032800	812530	974030	548090	651520	713500	470230	568070	1008900	622740	5266500	3876100	3514800	1395600	1263000	725100	608490	652760	387650	1496700	1468600	1452100	C00314	ko00750,ko01100
mah1572	C7H11N3O2	1-Methylhistidine	Amino acids and derivatives	Amino acids and derivatives	55883	36055	44319	86511	74433	75727	141360	152010	116710	111850	102680	124980	53886	38177	56061	78243	103340	91425	112670	100960	124930	119200	95331	132840	75815	90925	121680	C01152	ko00340,ko01100
mah1571	C7H11N3O2	3-N-Methyl-L-histidine	Amino acids and derivatives	Amino acids and derivatives	175080	117570	73722	361960	534440	507070	478650	313310	446160	226280	689880	492500	155790	154150	101860	204460	109380	359110	199230	247430	333160	378980	503710	239020	287000	281320	278510	--	--
mah0724	C8H15NO3	N-Acetyl-l-leucine	Amino acids and derivatives	Amino acids and derivatives	359590	308840	410650	454080	429670	435050	271290	344390	279560	221950	230980	179080	426650	241970	510000	318680	383510	443400	261580	364970	378550	258640	176070	331180	355470	221750	353380	C02710	--
mah1424	C6H6O6	trans-Citridic acid	Organic acids	Organic acids	186210	229280	209660	202460	226030	232060	141930	192360	276850	188270	183200	211690	159770	225600	150510	193150	222520	174530	210670	131890	148420	223520	194540	191150	309580	193600	220590	--	--
mah0167	C6H6O6	Cis-Aconitic acid	Organic acids	Organic acids	25183	25012	21624	61455	61474	52498	36368	31142	36021	25638	49658	40786	43513	27568	45758	34234	11848	31566	57972	73376	60067	45685	45226	32737	57720	48809	46032	C00417	ko00020,ko00630,ko00660,ko01100,ko01110,ko01210
mah1563	C7H14N2O3	L-Theanine	Amino acids and derivatives	Amino acids and derivatives	214240	183900	143980	224020	267690	200270	206210	246280	197240	266330	212000	238660	164760	185430	148130	167460	198570	248670	226540	196930	159160	225620	160650	144710	267510	249520	178620	C01047	--
mah0058	C6H14N4O2	L-(+)-Arginine	Amino acids and derivatives	Amino acids and derivatives	131720	140910	278150	3706900	3560100	3737700	4977500	4511200	5407100	4449600	4308400	3864400	308550	283890	389840	1847000	2851300	3116200	6718100	5096300	6049800	4758000	5626800	6662500	3432700	3280200	3631800	C00062	ko00220,ko00261,ko00330,ko00472,ko00970,ko01100,ko01110,ko01230,ko02010
mah1651	C6H9NO5	N-Acetylaspartate	Amino acids and derivatives	Amino acids and derivatives	68189	90100	79464	44505	60651	47766	49335	41722	66210	71870	86304	93950	125310	132470	258440	80138	49627	53146	76436	73902	79851	96288	85241	76388	73988	56487	86211	C01042	ko00250,ko01100
mah1522	C6H13N3O3	L-Citrulline	Amino acids and derivatives	Amino acids and derivatives	3129900	2307200	3265800	14929000	15718000	14186000	12113000	10682000	12115000	6917800	9426700	7603500	2381800	2805200	1991700	5393200	6296800	5438500	7305700	7965000	5752000	5649900	4780100	3887500	8231100	8638400	8884100	C00327	ko00220,ko01100,ko01110,ko01230
mah0567	C7H12O5	2-Isopropylmalate	Organic acids	Organic acids	1476900	1892400	1278300	29752000	28596000	31606000	28217000	25349000	21915000	20510000	14061000	16118000	1831200	2608500	2313000	18829000	22864000	23888000	28932000	29731000	21281000	12827000	17460000	12946000	18920000	19987000	18156000	C02504	ko00290,ko00620,ko01100,ko01110,ko01210,ko01230
mah2146	C9H6O4	Esculetin (6,7-dihydroxycoumarin)	Lignans and Coumarins	Coumarins	9	9	9	9	9	9	9	9	9	9	9	9	57335	56142	9	57672	9237.5	22961	10748	10870	9	9738.2	9	9	20683	21493	15292	C09263	--
mah1423	C6H13NO5	Glucosamine	Others	Saccharides and Alcohols	796950	917120	848750	789250	774010	843570	826790	852500	722280	647370	758410	805110	900830	814000	906640	834000	896190	887070	748950	734590	696430	667280	747250	752780	762580	883950	843970	C00329	ko00520,ko01100
mah0090	C6H12O6	D(+)-Glucose	Others	Saccharides and Alcohols	2164700	2270100	2850400	1175500	1510800	1338600	1383700	1369700	1173500	949060	741110	628670	2511000	2621700	1763500	1484700	1781700	1779600	1431500	1078800	832170	592790	947540	940100	1867500	1507000	1791300	C00031	ko00010,ko00030,ko00052,ko00500,ko00520,ko00901,ko01100,ko01110,ko02010
mah0085	C6H12O6	Inositol	Others	Saccharides and Alcohols	807950	946550	980690	3034300	3245700	3231300	3190300	2628100	2293300	1936700	2253000	2368400	949870	938690	863370	3121200	3124100	3497300	3043100	2658800	2339100	2131900	2328100	1926500	2123200	2136100	2289000	C00137	ko00052,ko00053,ko00562,ko01100,ko01110,ko02010,ko04070
mah1595	C9H11NO3	L-(-)-Tyrosine	Amino acids and derivatives	Amino acids and derivatives	271610	219280	257540	1222800	1217500	878920	809340	702890	818110	736090	481170	428470	847340	167210	649540	672580	716580	819140	1257300	1326500	1038900	506940	498700	458610	1302500	846470	851030	C00082	ko00130,ko00261,ko00350,ko00360,ko00400,ko00460,ko00730,ko00940,ko00950,ko00965,ko00966,ko00970,ko00998,ko01100,ko01110,ko01210,ko01230
mah1435	C6H14O6	D-Sorbitol	Others	Saccharides and Alcohols	4142400	4590400	3804600	3813900	3614700	3684100	3803300	3622800	3443800	3260600	3738000	3373200	3739600	3302100	3771600	3320700	3534500	3448000	3733200	3752600	3462300	3589700	3441300	3134200	4527600	3858300	3588300	C00794	ko00051,ko00052,ko01100,ko02010
mah1531	C5H15ClNO4P	O-Phosphocholine	Alkaloids	Alkaloids	8830400	6965500	6696700	2287200	3392100	2730500	1188900	1374200	1706600	2560000	2384500	3223200	5039100	3651000	4169100	3351600	3746400	4027700	1712700	1298800	1832600	2757300	1974100	2450900	3517000	2172800	3589600	C00588	ko00564,ko01100
mah1717	C8H9NO4	4-Pyridoxic acid	Others	Vitamin	119470	105140	108550	421440	342790	446820	447840	350640	473470	335970	242440	174260	258320	198540	248740	416860	473260	610920	441320	395190	315870	245140	144670	158760	340900	323230	272670	C00847	ko00750,ko01100
mah0228	C7H12N2O4	Nα-Acetyl-L-glutamine	Amino acids and derivatives	Amino acids and derivatives	7245600	13386000	11875000	1937200	2263300	1931700	1547700	1227000	1480100	971730	935300	1193500	12928000	9051000	12158000	2508800	1849600	2398200	1540900	1556400	1261500	1012800	903250	664480	3139300	3051200	2983900	--	--
mah0958	C9H16O4	Azelaic acid	Organic acids	Organic acids	13647	16403	23409	33640	61863	33595	27672	30434	24532	18776	28489	18353	38408	26181	13630	26630	48382	41418	43190	49688	35894	21986	21474	21598	37274	36105	29518	C08261	--
mah1573	C8H16N2O3	N6-Acetyl-L-lysine	Amino acids and derivatives	Amino acids and derivatives	117320	113180	136840	209420	166340	145950	117160	195370	222500	194220	213090	203820	254320	204720	222940	293390	217320	353150	143550	233630	224830	257540	232890	180880	206270	259430	217180	C02727	ko00310,ko01100
mah1495	C7H16N4O2	H-HomoArg-OH	Amino acids and derivatives	Amino acids and derivatives	62078	42674	55275	265400	263300	304360	317290	325530	325860	355050	316980	287850	79864	100010	104090	307750	302030	351940	351230	342850	338790	355390	338800	269310	274600	271870	251650	C01924	--
mah2047	C10H7NO3	Kynurenic acid	Organic acids	Organic acids	307150	420250	349160	455130	395280	323680	331700	250320	258540	247350	256590	179580	557470	515550	791980	553010	374680	958400	368060	464470	503790	251860	188300	240920	391600	424860	431930	--	--
mah0222	C7H11NO5	N-Acetyl-L-glutamic acid	Amino acids and derivatives	Amino acids and derivatives	287980	501640	398580	2649800	2852100	1971900	2154200	1853000	1614500	1555100	779170	1289000	701020	530490	415890	1341100	1529600	1496500	2234500	2112500	1751900	1765300	1359900	1382000	1823800	1887100	1959800	C00624	ko00220,ko01100,ko01110,ko01210,ko01230
mah0214	C6H8O7	Citric acid	Organic acids	Organic acids	988210	666230	1023600	6762500	6210100	7396600	7535700	8096300	9115500	11284000	9660200	12827000	1505400	1346900	1335300	6120600	6761000	7246000	9236000	9651500	12731000	9292800	9722800	9910500	7947000	5854900	7559900	--	--
mah2338	C10H8O4	Scopoletin (7-Hydroxy-5-methoxycoumarin)	Lignans and Coumarins	Coumarins	9	9	9	220860	133830	173580	186360	135080	136220	151010	90857	157930	35723	15523	9	191950	329980	232300	316070	331550	292390	260490	223870	268210	160900	90889	136700	C01752	ko00940,ko01110
mah0210	C7H12O6	Quinic acid	Organic acids	Organic acids	550010	432330	587380	4166700	3255900	3583100	3525100	3703500	4798500	5326800	5255500	6499500	684430	812990	628780	3131400	3389400	3700400	5489300	5748800	6273300	5464400	5027400	5225000	4068600	3949500	3704300	C00296	ko00400,ko01100
mah0096	C6H10O7	D-glucoronic acid	Others	Saccharides and Alcohols	137810	158920	143780	197080	693940	402190	155930	563930	152890	726220	101690	129890	195500	171160	111340	450620	879740	836770	133960	320640	525810	724540	235730	183490	358320	338280	510140	C00191	ko00040,ko00053,ko00520,ko00562,ko01100
mah2418	C10H10O4	Ferulic acid	Phenolic acids	Phenolic acids	167160	150090	223870	1290400	927350	1046400	375700	701560	180230	81897	104000	58776	226520	162210	102300	1909600	2543600	1714900	855050	772570	288510	117840	206050	125100	655850	548930	632040	C01494	ko00940,ko01100,ko01110
mah0902	C10H10O4	Trans-ferulic acid	Phenolic acids	Phenolic acids	364870	295800	464660	1941800	1525200	1148000	517030	1097900	267410	177020	163890	144890	555030	392090	182590	5560700	5245800	4533900	1687500	1507100	640960	299820	271230	201010	874870	1149600	1088200	--	--
mah0685	C10H10O4	Hydroxy-methoxycinnamate	Phenolic acids	Phenolic acids	45031	154040	156260	9	27100	26926	18102	14530	10036	23241	20931	21258	101470	79526	95129	24418	15564	24712	21502	12655	8172.5	14958	9390	16238	52863	31766	42553	--	--
mah0077	C6H12O7	Gluconic acid	Others	Saccharides and Alcohols	2936800	1964200	2182200	1609100	1702900	2408000	2134500	2428300	2770900	2617600	2931800	1648200	2590900	2248700	2662500	2971000	4758700	6445500	1697100	2678900	2435300	2378400	3377200	1857500	2440100	2912000	3053500	C00257	ko00030,ko01100,ko01110,ko01200
mah2234	C9H10O5	Syringic acid	Phenolic acids	Phenolic acids	166670	137830	133060	249780	266940	172520	307140	283240	150280	80912	69184	69375	248340	170040	291840	163140	176400	167220	103700	83687	57334	141250	110520	108770	150030	134470	178590	C10833	--
mah1963	C9H10ClNO2	L-2-chlorophenylalanine	Amino acids and derivatives	Amino acids and derivatives	1958400	2091300	2307200	2363400	2136100	2666500	2531300	1943200	2677100	2526800	2921000	3058900	2221700	2272200	2399500	2093100	2338900	2145100	2587500	3142800	2097000	2496200	2613500	2024900	1891100	2384400	2433000	--	--
mah1351	C12H24O2	Lauric acid (C12:0)	Lipids	Free fatty acids	5424.5	6830.2	5516.3	3852.5	4431.6	4396.3	3475.3	3133.3	4516.2	4478.5	3227.1	4877.6	5257.5	5521.9	6368.6	4935.4	3021.4	4419.9	4169.1	3469.7	4371.2	3328.8	3157.1	3855.6	4849.9	4710.1	4296.9	C02679	ko00061,ko01100,ko01110
mah2553	C12H14N2O	N-Acetyl tryptamine	Alkaloids	Phenolamine	27130	21501	20473	23084	26657	26934	22426	10045	19813	17669	27031	23598	21312	19863	15155	22216	20106	18299	19855	11642	24308	17239	30353	20086	21373	23767	10151	--	--
mah1434	C10H26N4	Spermine	Alkaloids	Phenolamine	280950	268030	261580	220510	242370	227610	210170	214390	230800	226220	185400	210110	270290	247280	249260	221110	220210	232580	247540	220820	225600	214720	192840	208600	261500	238610	226950	C00750	ko00330,ko00410,ko00480,ko00770,ko01100
mah1929	C11H12N2O2	L-Tryptophan	Amino acids and derivatives	Amino acids and derivatives	161640	129180	106820	775080	1376700	1105100	431280	622200	337260	268590	245100	247280	783100	143050	1662700	2199000	2287000	4145400	713070	583070	503630	429960	161220	294560	1106700	1033300	877290	C00078	ko00260,ko00380,ko00400,ko00901,ko00966,ko00970,ko00998,ko01100,ko01110,ko01210,ko01230
mah2981	C15H24	β-Caryophyllene	Terpenoids	Terpene	790100	870020	811240	760330	670060	673930	875350	757100	681850	658380	671820	756620	747360	651230	734360	753970	640760	953520	610300	800140	570900	730400	590730	671320	710040	707240	633410	--	--
mah1930	C11H11NO3	Methoxyindoleacetic acid	Alkaloids	Plumerane	74320	62304	62226	404880	612360	495410	169220	272140	130050	154300	133910	118090	386880	77146	707940	877420	1030800	1847600	252270	322770	369500	194540	93588	176940	429370	417060	437230	C05660	ko00380
mah1853	C10H7NO4	Xanthurenic acid	Organic acids	Organic acids	155490	171330	158680	19721	30080	26758	21480	16368	31019	78715	71962	135010	213730	118680	431970	37864	51649	64022	32460	54890	63550	88524	72211	89337	94395	85168	95040	C02470	ko00380
mah2219	C11H10O4	6-Hydroxymethylherniarin	Lignans and Coumarins	Coumarins	32106	42918	43644	243530	203400	201450	187210	195020	145830	93308	143040	159390	44427	55987	57382	204080	172550	164160	168740	105670	136200	131590	116180	133120	138950	118500	139080	--	--
mah0771	C11H13NO3	N-Acetyl-L-phenylalanine	Amino acids and derivatives	Amino acids and derivatives	2581500	2720500	2960200	196020	422160	249240	211810	166140	205410	176340	116250	178740	3906200	2292500	3737800	255140	360680	1217400	161780	166330	132910	188890	131020	140060	1263100	892270	1119800	C03519	ko00360,ko01100
mah2296	C10H8O5	6-Methoxy-7,8-DihydroxyCoumarin	Lignans and Coumarins	Coumarins	72070	48128	55084	772650	637070	568850	562920	603690	483570	475010	409840	414810	29678	53184	80654	467780	640150	561600	475950	412280	367540	279190	331980	277080	505630	394800	500040	C09265	--
mah2484	C11H12O4	Sinapinaldehyde	Phenolic acids	Phenolic acids	9	9	9	278550	246740	286100	389860	292690	336780	292180	306540	269900	9	9	9	41756	59544	93606	249290	230520	214550	161730	227240	193870	165610	215970	164720	--	--
mah0817	C11H14O4	Sinapyl alcohol	Phenolic acids	Phenolic acids	95300	57496	80497	40985	89327	46180	45572	67659	55583	85208	46017	56524	27719	11828	27891	56494	49662	56327	49842	46220	15968	14257	20706	21954	71362	47144	40185	C02325	ko00940,ko01100,ko01110
mah1675	C10H13NO4	(-)-3-(3,4-Dihydroxyphenyl)-2-methylalanine	Amino acids and derivatives	Amino acids and derivatives	1570200	1352100	1306100	2010200	2120300	2382500	2225300	2162000	2111200	2628500	2609000	2629600	694300	994130	821630	1176200	767740	715420	1228700	1007400	1133100	1219600	1576600	1145300	1687600	1421200	1502300	C07194	--
mah0275	C9H9NO5	3-(6-Hydroxy-3,4-dioxo-1,5-cyclohexadien-1-yl)-L-alanine	Amino acids and derivatives	Amino acids and derivatives	118300	86789	52664	131100	131620	144820	148710	134830	127300	189830	212440	235190	57656	51762	50504	61247	34389	45434	99436	66731	62713	103180	122080	103850	101000	90340	89792	--	--
mah2534	C10H12O5	Propyl gallate	Organic acids	Organic acids	9	9	9	27497	26188	27707	24225	24367	31896	9	9	14557	9	9	9	15937	14754	37185	25308	21861	34626	16627	12891	18444	20665	14708	12990	C11155	--
mah0813	C13H13NO2	3-(2-Naphthyl)-D-alanine	Amino acids and derivatives	Amino acids and derivatives	26892	12843	55999	5545.8	14073	17822	12292	7291	15110	7774.5	11801	17324	14097	21866	30725	20782	9493.2	13865	11120	9	4442.2	12374	5632.8	6774.5	24926	19975	18495	--	--
mah1615	C8H16N4O3	Nα-Acetyl-L-arginine	Amino acids and derivatives	Amino acids and derivatives	33981	42884	38409	187340	136960	101640	242280	186650	158090	123860	92744	98248	33230	19583	36347	94354	80564	64680	352520	297620	166170	123000	137580	108430	178590	132770	161480	--	--
mah1859	C9H17NO5	D-Pantothenic acid	Others	Vitamin	827100	970760	1112500	921750	1149500	993190	1413600	977950	1027300	1682500	1337100	1683600	816050	698960	1095400	1021600	986820	1141300	681940	695120	641810	694990	677090	514130	1126000	1043700	961980	C00864	ko00410,ko00770,ko01100,ko01110
mah1655	C11H12N2O3	5-Hydroxy-L-tryptophan	Amino acids and derivatives	Amino acids and derivatives	20074	23528	16282	25188	26639	30221	21837	26284	40493	33477	29588	39717	19916	13176	47942	27484	23141	52631	28314	21738	25298	29893	33756	24806	31556	27408	37212	C00643	ko00380,ko01100
mah1445	C8H15NO6	N-Acetyl-D-glucosamine	Others	Saccharides and Alcohols	420990	504340	448780	417250	390970	396730	400310	394410	323000	332490	330740	396510	439590	390900	451320	374790	395430	373960	360140	393890	344490	354590	369820	358230	383390	424030	406950	C00140	ko00520,ko01100,ko02010
mah2004	C11H13NO4	N-Acetyl-L-tyrosine	Amino acids and derivatives	Amino acids and derivatives	17338	26278	12192	30974	21127	23945	7478	22996	12224	50735	3765.8	8457.5	50771	20671	58927	62036	70378	76194	29495	14063	8912	154290	7506.8	3780	38775	33862	30324	--	--
mah2400	C11H12O5	Sinapic acid	Phenolic acids	Phenolic acids	60925	47907	211820	837380	834580	463880	151160	141330	53214	45956	38951	40286	42275	43388	33872	2026600	1554800	1111900	169200	142080	37828	13524	9	28668	353150	390890	375390	C00482	ko00940,ko01100,ko01110
mah1586	C9H13N3O4	Deoxycytidine	Nucleotides and derivatives	Nucleotides and derivatives	128600	182270	95804	404040	456450	392210	320040	309870	244760	159700	148830	93090	176890	165940	73696	402350	501540	399150	217410	275130	155270	123100	102310	106180	233080	217260	223380	C00881	ko00240,ko01100,ko02010
mah1387	C14H28O2	Myristic Acid	Lipids	Free fatty acids	2737000	6572400	3455100	5062600	7420400	5186600	6542400	5912500	5260300	5093500	8247200	3547000	3550800	3858400	3505900	4244700	5116300	4842700	7000200	4386900	4177600	6945800	5235400	5132900	7498000	7030500	7533000	--	--
mah1798	C10H14N2O5	Thymidine	Nucleotides and derivatives	Nucleotides and derivatives	59929	62922	67054	170430	166240	196780	139980	169680	200330	207630	87682	110580	132680	79956	109480	56549	70950	139300	126980	153010	189470	164770	167250	261630	115340	136640	126680	C00214	ko00240,ko01100
mah0231	C9H12N2O6	β-Pseudouridine	Nucleotides and derivatives	Nucleotides and derivatives	127040	125460	156360	35057	48897	41856	49569	38454	47161	39788	91521	35257	200630	175880	132680	40593	43662	23976	60603	95891	42091	64970	103800	58751	117820	64330	81539	C02067	ko00240,ko01100
mah0229	C9H12N2O6	Uridine	Nucleotides and derivatives	Nucleotides and derivatives	679920	1418400	1251200	259220	252030	380160	521630	534360	467750	427060	824740	319860	1885400	1418400	1121500	202630	368330	426990	635580	451840	264940	505390	970680	529220	558190	432270	476160	C00299	ko00240,ko01100,ko02010
mah2225	C10H16N2O3S	Biotin	Others	Vitamin	239190	189640	223190	177770	165180	257620	88940	98761	76922	86880	118400	173260	336710	334370	313880	302650	330690	311470	116150	169490	108340	79640	105240	64241	196980	257750	182730	C00120	ko00780,ko01100,ko02010
mah0834	C13H14N2O3	Acetyl tryptophan	Amino acids and derivatives	Amino acids and derivatives	4877600	3072700	2760300	129290	411940	410340	222030	272280	174390	310160	205220	238980	7278400	11500000	13267000	361170	765210	5976200	166080	289880	240870	283200	177600	167200	2768100	1563600	2575000	C03137	--
mah1539	C8H14N2O5S	γ-Glu-Cys	Amino acids and derivatives	Amino acids and derivatives	494360	506920	479600	966320	722870	825720	500060	573270	453460	450000	359720	485990	337190	312320	296690	940730	966100	672360	230180	314310	291870	297160	366470	399420	563530	566630	592430	C00669	ko00480,ko01100
mah1766	C10H13N5O3	Deoxyadenosine	Nucleotides and derivatives	Nucleotides and derivatives	484790	677060	765000	643060	721640	1807300	1128000	965700	1740200	532420	629820	267990	719220	779490	695870	780450	567060	407850	775480	838460	637840	731940	478780	508660	772240	536740	546650	C00559	ko00230,ko01100,ko02010
mah2567	C15H10O4	Daidzein	Flavonoids	Isoflavones	233120	598900	211130	9	9	9	9	9	9	9	9	9	6810500	5793600	6175700	38370	6283.1	18820	6834.6	15749	9378.8	9	6381.4	9	1094500	1071200	1020300	C10208	ko00943,ko01110
mah2569	C15H10O4	7,4'-Dihydroxyflavone	Flavonoids	Flavonoid	218250	516020	144710	9	9	9	9	9	9	9	9	9	6481300	4532000	5740800	39468	11186	11021	3073.2	11679	9	9	9	9	870670	917710	879200	C12123	ko00941,ko00943
mah1527	C11H13NO6	Nicotinate ribonucleoside	Others	Vitamin	849370	1027400	1252100	1089300	1054900	983350	873880	918070	1034500	1308000	1512900	1568800	1294800	1097600	1979800	1428100	1725000	1984400	1230300	1406200	1190900	1153300	1264000	1029500	1276200	1598900	1160500	C05841	ko00760,ko01100
mah2689	C15H12O4	Isoliquiritigenin	Flavonoids	Chalcones	40024	145030	45231	9	9	3991.1	9	3701.9	9	9	9	9	507990	1046900	415630	4371.5	9	7509.1	9	4879.6	2040	2091.4	1898.2	9	81558	77173	77437	C08650	ko00941,ko01110
mah1405	C16H32O2	Hexadecanoic acid	Lipids	Free fatty acids	4274200	4730700	4933400	5913600	6478300	6139800	5946800	5908000	6229500	6158100	5477800	5054400	4361000	3937300	3449500	4514400	5317900	5015600	5449700	5219600	5330400	5534200	5534800	5032300	5977800	5361400	5221000	C00249	ko00061,ko00062,ko00071,ko00073,ko01040,ko01100,ko01212
mah1525	C8H20NO6P	sn-Glycero-3-phosphocholine	Alkaloids	Alkaloids	510480	539750	541550	94668	89532	148320	212460	111830	150490	165320	111030	99872	1299400	892040	810890	109110	123240	261480	168110	187430	280120	112140	101630	70882	166780	142450	205730	C00670	ko00564,ko00565
mah0061	C6H13O9P	D-Fructose 6-phosphate	Others	Saccharides and Alcohols	1215800	737520	1356100	1420000	1558000	2141800	1223400	1467400	1202800	1705000	1129900	1378600	662010	829730	459690	3661100	2695400	1805400	2071000	1740700	1672900	1364300	1151400	712590	1792300	1785700	1567100	C00085	ko00052,ko00500,ko00710,ko01100,ko01110,ko01200
mah0318	C10H13N5O4	Deoxyguanosine	Nucleotides and derivatives	Nucleotides and derivatives	10296	15117	13750	104940	102720	194540	71691	81654	94247	77315	48150	50309	38002	22599	73641	146970	167940	145450	200270	138980	133070	148490	115240	89350	77015	78099	76088	C00330	ko00230,ko01100,ko02010
mah1738	C10H13N5O4	Adenosine	Nucleotides and derivatives	Nucleotides and derivatives	1867700	2410600	2791700	364220	474440	490660	710570	680270	748370	639630	1176600	666320	1983100	2662300	2416800	530240	580490	319000	414600	349140	292270	1031900	473970	313270	1119000	910180	1076200	C00212	ko00230,ko01100,ko02010
mah1209	C16H12O4	Formononetin (4'-O-methyldaidzein)	Flavonoids	Isoflavones	2248600	693720	2187400	2999	56463	586860	5881.6	82237	6318.6	10425	667.25	6225.6	4937700	385960	763290	13285	5253.2	2607.5	781.47	17380	5770.7	2485.9	2004.7	709.48	937490	732290	686220	C00858	ko00943,ko01110
mah0932	C15H10O5	Demethyltexasin	Flavonoids	Isoflavones	9	9	9	9	11389	9	31362	30686	63491	179630	268160	189490	9	9	9	2896.2	2912.5	4588.8	54724	51010	192670	239060	228290	253120	101850	105440	76355	C14314	ko00943,ko01110
mah3088	C13H18O6	Benzyl β-D-Glucopyranoside	Others	Others	24325	22474	25880	23115	24178	25504	26101	27044	24666	26410	23821	26387	21918	23266	23280	27375	24658	24581	25379	24578	24032	21063	26251	25257	25164	21062	22963	--	--
mah3086	C18H38O	1-Octadecanol	Lipids	Glycerol ester	12454	14890	10233	12291	12300	14811	13716	13891	14510	11563	10670	10623	7777.2	8324.7	6095	9994.7	12362	13519	11264	14520	11105	11170	10434	11507	13601	10813	11145	V01924	--
mah2176	C15H14O5	Afzelechin(3,5,7,4'-Tetrahydroxyflavan)	Flavonoids	Flavanols	9	9	9	9	9	3966	9	9	9	2642	9	4631.5	38653	62765	44186	204280	165870	207350	45427	75193	50134	19028	23050	19842	68133	50221	31351	C09320	ko00941,ko01110
mah2875	C18H28O2	Octadecadien-6-ynoic acid	Lipids	Glycerol ester	649760	1012600	1573100	728790	1174800	671250	662730	951750	524680	545010	852510	371800	1214100	1649700	969240	1193400	1309700	875830	630610	437740	321490	713530	498140	297160	822420	849480	823780	--	--
mah2874	C18H28O2	14,15-Dehydrocrepenynic acid	Lipids	Free fatty acids	623760	1021000	1667200	809830	1184400	714530	599870	963960	505200	564940	889330	422960	1250700	1638700	1016700	1066700	1436500	957020	579810	476930	274160	677080	520560	291190	880030	876910	949110	--	--
mah0615	C11H22N2O4S	Pantetheine	Others	Vitamin	42616	47775	38787	61094	34526	45226	32564	55777	39776	84111	68349	38546	107310	73562	52758	27905	43752	43756	24503	23244	35788	86172	67817	44387	47827	45697	37220	C00831	ko00332,ko00770,ko01110
mah2980	C16H22O4	Senkyunolide M	Others	Others	604240	624430	600470	587430	475450	535430	659650	517230	474790	508820	579850	564300	619470	552000	633460	628220	550050	669950	536250	636830	471800	631300	511770	519240	573330	538730	528560	--	--
mah2934	C17H28NO2+	N-methyldendrobine	Alkaloids	Sesquiterpene alkaloids	82432	172120	312320	105910	212260	94212	110240	164860	144230	275430	379100	142400	223880	298600	183410	92727	147460	92351	130880	113840	136640	402370	244840	122780	189210	183050	176040	--	--
mah3031	C18H30O2	α-Linolenic acid	Lipids	Free fatty acids	867990	996940	942650	975300	1123500	1081900	1114500	1086200	963940	783480	843770	638220	1012400	989370	950080	1063400	1059500	982060	1073800	862440	708820	720480	669530	651300	921010	913160	907040	C06427	ko00592,ko01040,ko01100,ko01110
mah2978	C18H30O2	Octadeca-11E,13E,15Z-trienoic acid	Lipids	Glycerol ester	1364600	1394100	1198200	1258200	1078500	1136000	1553400	1218100	1167400	1125900	1202800	1343500	1292100	1084200	1259300	1412500	1196500	1614900	1181700	1312800	976650	1338200	1073600	1113900	1247800	1168400	1146500	--	--
mah1375	C18H30O2	γ-Linolenic Acid	Lipids	Free fatty acids	14889000	16264000	18030000	21468000	22376000	20419000	21073000	22210000	19398000	16611000	17031000	14171000	20401000	18003000	16513000	21084000	21623000	20048000	20553000	17534000	14913000	14645000	15317000	14169000	19010000	19592000	18247000	--	--
mah2924	C18H30O2	Punicic acid	Lipids	Free fatty acids	224720	428440	810870	260900	591260	282130	305460	435090	379140	701700	933010	402750	565580	850550	439520	262370	391550	218560	381640	273210	378140	1018800	598750	358470	582730	535780	491740	C08364	--
mah1990	C13H16N2O5	Asp-phe	Amino acids and derivatives	Amino acids and derivatives	79219	74936	70354	117840	149860	134730	96929	92400	62882	88834	67488	57003	65596	59994	62390	230800	182150	271640	105150	91654	73405	117470	65812	69170	117290	120440	112330	--	--
mah1419	C18H32O2	Linoleic acid	Lipids	Free fatty acids	76725	115160	176770	79453	150230	115060	138750	154120	133480	131810	246570	167350	87474	72787	78135	94474	126870	91339	164680	159760	99601	194880	157630	107030	95285	107730	110530	--	--
mah3048	C18H35NO	Octadecenoic amide	Others	Others	24309	16182	30120	40126	43795	34782	68176	30424	29775	35884	17044	28473	60655	9206.1	20474	25102	37138	46627	22693	20322	29393	35025	22146	17841	37263	28429	26733	--	--
mah1409	C18H34O2	11-Octadecanoic acid(Vaccenic acid)	Lipids	Free fatty acids	6602600	8046300	8585600	11609000	12946000	11598000	12687000	12213000	12193000	12633000	10666000	10152000	5872500	5944000	4409500	9127600	10142000	9748400	10445000	9651700	10020000	12216000	10668000	9753100	12151000	9303700	9129800	--	--
mah1401	C18H34O2	Oleic Acid	Lipids	Free fatty acids	436940	494340	551720	539010	586870	521150	538820	529300	569860	479470	607830	475470	411170	386460	345500	401770	481680	444450	538130	421760	524440	540580	533250	541820	613150	461180	506450	--	--
mah1680	C10H13N5O5	Guanosine	Nucleotides and derivatives	Nucleotides and derivatives	1073600	1442300	1859300	3131400	2755500	2168900	1171500	1331400	865880	593730	464190	361100	2125200	2258500	914070	15198000	12268000	8410100	1664500	1447700	837230	1070700	765150	501630	3928200	4410900	3103200	C00387	ko00230,ko01100,ko02010
mah2588	C16H12O5	Glycitein	Flavonoids	Isoflavones	464290	1131900	527440	9	9	9	9	9	9	9	9	9	93029	40725	160910	9	9	9	9	9	9	9	9	9	107810	91205	128640	C14536	ko00943,ko01110
mah1679	C10H12N4O6	Xanthosine	Nucleotides and derivatives	Nucleotides and derivatives	2259300	2795800	3485900	6220700	5061700	5229300	1949100	1964700	1798600	1503900	1623600	850780	3098900	3297000	2106500	25356000	21445000	12508000	3609800	3043900	1463200	2250100	1234400	1258700	6295300	5448600	6053100	C01762	ko00230,ko00232,ko01100,ko01110,ko02010
mah1384	C18H36O2	Stearic Acid	Lipids	Free fatty acids	29700000	18110000	25003000	26419000	23039000	38566000	28460000	33985000	34977000	37232000	5823300	39919000	28273000	24626000	19748000	21660000	23883000	23839000	28834000	36504000	30107000	25714000	40795000	30592000	2837000	2544600	2995500	--	--
mah1791	C12H15NO7	Nicotinic acid-hexoside	Others	Vitamin	740840	860570	1272100	77303	68063	54014	36829	27072	10118	7971.2	8683	8457	277230	228410	358300	184150	142790	75828	9	20575	9	6583.8	10252	14569	217470	129900	130030	--	--
mah2262	C15H11O6+	Cyanidin	Flavonoids	Anthocyanins	1648200	1574600	1281500	30510	65889	29340	35798	6473.5	12414	30753	9498.2	30937	1747500	1813700	1614800	74356	31195	35751	12577	22901	13300	9	9	7796.8	856880	764270	906510	C05905	ko00941,ko00942,ko01100,ko01110
mah0705	C15H12O6	Fustin	Flavonoids	Dihydroflavonol	28381	30456	24792	66826	37054	42714	63268	38753	28702	46119	24860	22310	9	9	9	9	9	9	9	9	9	9	9	9	16546	16809	15328	C01378	ko00941
mah2745	C18H26O3	4-oxo-9Z,11Z,13E,15E-octadecatetraenoic acid	Lipids	Glycerol ester	8573.2	12890	13391	3151.4	5638.7	3372.1	2876.1	4795.4	3803	5826.3	8708.2	4048.8	16131	13638	11421	3698.6	3014.8	3338.9	2159.9	3388.9	1750.4	5297	7726.7	2952	6751	6073.2	7103.3	--	--
mah0062	C10H18N4O6	Argininosuccinate	Organic acids	Organic acids	38638	8990.5	49006	134180	120700	114880	145730	132520	142280	115540	91144	73667	40674	36886	15174	146140	123630	128760	173660	179130	117680	128020	148420	45589	111480	105910	129750	C03406	ko00220,ko00250,ko01100,ko01110,ko01230
mah1281	C18H30O3	9-HOTrE	Lipids	Free fatty acids	328750	501390	890290	383150	589750	347160	276000	444550	235220	273220	364580	180190	603710	848500	471090	555650	595380	374230	258180	190870	112380	284030	218120	110710	467350	390200	347170	--	--
mah1245	C18H30O3	13-HOTrE(r)	Lipids	Free fatty acids	22570	32097	20936	24669	28087	50854	31349	24838	42444	27118	36638	26050	23248	49157	27048	30115	25502	29233	24724	25273	25185	28513	30363	26049	30290	29718	29254	--	--
mah2059	C14H18N2O5	gamma-glutamylphenylalanine	Amino acids and derivatives	Amino acids and derivatives	30552	47808	74994	70936	218460	88044	69898	58302	42844	43278	48946	16788	92064	40118	94063	54648	236100	250790	72449	93278	71404	67206	35474	32353	91328	81913	58656	--	--
mah2797	C17H26O4	6-Gingerol	Others	Others	82567	195950	404080	125410	273200	107450	147020	240300	278030	615660	1096900	357980	284550	367610	220780	168210	267980	134210	282290	197830	190390	1208100	565900	219480	354470	309080	315550	C10462	ko00945,ko01110
mah2947	C18H30O3	9-Hydroxy-(10E,12Z,15Z)-octadecatrienoic acid	Lipids	Glycerol ester	21466	67932	102450	37089	66666	27847	25184	52047	37820	67047	93637	31644	83741	119370	60605	38958	49850	32662	29113	49771	51183	121170	70404	24850	62005	61828	57008	--	--
mah1338	C18H30O3	9-KODE	Lipids	Free fatty acids	131460	240700	317900	121240	202230	120130	93548	199440	120900	176090	210230	97313	326070	341740	284010	233080	333070	183210	142540	110390	49173	228310	106380	54738	206650	186480	180610	--	--
mah1326	C18H32O3	9,10-EODE	Lipids	Free fatty acids	104100	213090	367270	116540	247620	116020	128900	197070	160170	272000	372440	177030	222210	306360	186210	118660	165350	103280	161540	112760	142100	417730	262630	149390	238790	203540	189320	--	--
mah1356	C18H32O3	12,13-EODE	Lipids	Free fatty acids	61966	135430	207290	50639	115460	47206	62723	96108	97618	188860	245830	98958	159510	178240	124160	75037	119180	53301	89401	56037	39979	303420	124950	65448	132800	110950	105070	--	--
mah1319	C18H32O3	13-Hydroxy-9,11-octadecadienoic acid	Lipids	Free fatty acids	792420	1806600	3526200	1054000	2457400	949550	1164900	1653400	1388300	2652600	3899800	1612200	2285500	3440100	1895300	1084900	1583800	931120	1369500	1040900	1278600	4344500	2363400	1207900	2064100	1956900	1840200	--	--
mah1320	C20H40O	Phytol	Others	Others	48990	116540	238900	69040	165780	67107	73901	106830	94174	177220	252360	109270	148930	220370	124740	67513	112060	57798	92789	64767	83326	276320	157380	74976	132870	117750	130750	C01389	--
mah2080	C11H15N5O3S	5'-Deoxy-5'-(methylthio)adenosine	Nucleotides and derivatives	Nucleotides and derivatives	1055600	1084200	970220	475480	480170	469210	354560	361450	319040	358540	289870	561510	942050	987260	736170	558680	420620	360150	443000	322150	418130	354460	226080	353610	472330	615810	578400	C00170	ko00270,ko00908,ko01100
mah1607	C11H15N5O5	N2-methylguanosine	Nucleotides and derivatives	Nucleotides and derivatives	14292	27230	21154	57197	56485	100770	25418	35310	27132	34270	13772	15986	27084	25274	20954	175170	124800	95446	33617	23862	15058	66130	12673	19992	48040	40233	42523	--	--
mah1347	C20H42O	1-Eicosanol	Lipids	Glycerol ester	20121	19426	24953	135200	331680	177340	641910	574460	885520	1193000	2308200	1127700	21055	25494	19600	28758	46109	40870	769660	403570	632560	2035600	1807600	1416000	717290	629100	619130	--	--
mah2798	C18H39NO2	D-erythro-Dihydrosphingosine	Lipids	Sphingolipids	70071	69098	67067	80925	81649	78763	71990	72910	56354	70279	68543	74463	63406	71826	72289	86155	88924	78706	67086	72593	66269	65714	66375	62718	73598	72635	74043	--	--
mah1529	C12H21N3O6	Nicotianamine	Amino acids and derivatives	Amino acids and derivatives	1102700	977480	1199100	678860	1238000	752170	1001500	934630	1222800	1430800	1437000	1278700	714580	1106400	583240	911910	715000	784900	892190	976550	1522200	1225300	1637600	1130500	1330300	1049000	1029100	--	--
mah2050	C15H14O7	Epigallocatechin (EGC)	Flavonoids	Flavanols	13040	9	9307.5	8439.8	14080	24285	13009	15820	8276.2	5637	7544	9	5571.2	2802.8	6491	15907	49494	25895	3663.2	9	15682	7390	3710.8	2673.2	12437	14107	16334	C12136	ko00941,ko01110
mah1235	C18H30O4	9-HpOTrE	Lipids	Glycerol ester	17139	32328	57640	51117	75124	42962	35231	67049	31993	37896	64428	31628	53899	82431	51667	71012	101010	49719	45660	33224	19753	48028	44157	20379	47097	46915	44541	--	--
mah1388	C20H38O2	cis-Gondoic acid	Lipids	Free fatty acids	54813	147060	67360	103090	166170	108670	124420	120560	121430	116790	208080	78855	74601	75445	73741	112150	122940	108600	148940	93493	97998	165440	98933	107450	167710	173200	183790	C16526	ko01040
mah1254	C18H32O4	13-HPODE	Lipids	Glycerol ester	35778	84305	178840	75697	141520	60588	82471	122390	146220	266130	480220	167070	112700	163090	102350	94459	136410	70825	140370	90802	71398	492120	262340	110620	160850	147980	150130	C04717	ko00591,ko01100
mah0344	C13H16O9	Protocatechuic acid-4-glucoside	Phenolic acids	Phenolic acids	6709900	6862800	8447900	1205700	1228400	1029000	833260	1166200	1206300	1499300	908460	1342700	6898800	3007000	5306100	3532400	2941400	2626100	786010	802040	723220	563530	556270	457840	3483200	2710200	2075700	--	--
mah0503	C13H16O9	Protocatechuic acid O-glucoside	Phenolic acids	Phenolic acids	594300	379520	700630	53437	53578	62677	54874	45719	33161	64672	48864	42459	284300	437990	594800	81872	48330	38947	13458	32006	18755	37110	33932	51008	164450	156630	191730	--	--
mah0343	C13H16O9	2,5-dihydroxy benzoic acid O-hexside	Phenolic acids	Phenolic acids	5030600	4888200	5904300	1117600	1038800	908110	570950	900230	1036900	1131400	760660	914500	4815000	2673100	4668800	2531900	1932000	2283100	616690	760320	773380	799200	872240	474630	1602100	2245700	1801200	--	--
mah2923	C20H30O3	Hispanolone	Others	Others	49860	97891	158630	55273	139900	55473	61064	91024	71701	158350	238440	103830	105600	173230	95395	65532	82210	46568	74751	55344	64973	210400	131870	75775	128290	108620	95030	--	--
mah0805	C16H16O7	3-O-p-Coumaroyl shikimic acid	Phenolic acids	Phenolic acids	365630	168120	238420	49950	63395	49804	31409	60019	41094	28696	39244	34687	167140	148350	138620	82231	72472	63036	35838	42732	32594	39786	30219	25745	102470	77403	95279	--	--
mah0194	C9H13N2O9P	Uridine 5'-monophosphate	Nucleotides and derivatives	Nucleotides and derivatives	285010	144350	278370	956830	1136300	757350	760570	491910	502530	753800	527020	380840	315660	254590	213800	623750	783810	782670	888430	970900	603090	459040	395020	420370	689980	684170	497910	C00105	ko00240,ko01100
mah3040	C20H39NO2	N-Oleoylethanolamine	Others	Others	31761	43401	62322	403500	648200	679820	539720	556220	479340	552410	614790	348240	50734	47733	50051	334250	578200	696010	401030	496900	450110	1377800	1341600	778780	477820	442870	389730	--	--
mah1188	C17H14O7	Di-O-methylquercetin	Flavonoids	Flavonols	165220	228880	317880	133250	274610	163970	143800	168620	218430	257710	368050	143610	303150	361240	299070	334040	277750	342170	171500	184340	266270	663800	239600	122930	266360	224320	257180	--	--
mah1186	C18H34O5	9,10,13-Trihyroxy-11-octadecadienoic acid	Lipids	Free fatty acids	164980	247080	362000	173660	287420	208300	160370	183630	255560	326380	373150	177240	347110	427660	370610	345830	306440	380280	172510	216380	314600	638600	303390	167520	320270	282250	325020	--	--
mah1602	C14H21NO8	Pyridoxine O-glucoside	Others	Vitamin	381470	295060	368240	360530	593830	747790	393940	578120	355140	542180	451400	423900	490640	606720	949230	642600	1008200	2236600	338690	664820	536570	375430	346310	334600	614220	616860	627310	--	--
mah0372	C13H16O10	Gallic acid O-Hexoside	Tannins	Tannin	1312700	1343900	1234300	363860	406700	465780	349220	349990	437470	465030	352840	524940	2616900	1272500	1451300	1349600	1069800	1077500	385290	532220	383780	222400	233250	226050	754370	715880	775960	--	--
mah1464	C10H13N4O7P	2'-Deoxyinosine-5'-monophosphate	Nucleotides and derivatives	Nucleotides and derivatives	567560	555820	973390	104060	65172	82612	169770	140940	187650	597740	851140	551480	596730	181750	249680	85550	66540	52475	157030	166600	227980	755670	846880	686860	101720	95987	124830	C06196	ko00230
mah1513	C11H15N2O8P	β-Nicotinamide mononucleotide	Nucleotides and derivatives	Nucleotides and derivatives	5145600	4079500	4912200	3938900	4573200	4753300	3504600	3771400	5302000	3898500	4647100	5262500	3814800	3936900	3691700	9807100	6267100	6696200	6412800	6243500	4122400	5400900	4602900	3166700	2710900	4293900	5043800	C00455	ko00760,ko01100
mah2196	C19H14O6	O-Feruloyl 2-hydroxylcoumarin	Lignans and Coumarins	Coumarins	13204	11977	11673	39222	17608	38361	21482	34771	30452	20236	10063	19648	7862	24686	9	19009	15246	28851	41681	40186	39244	16938	24598	14210	18354	25560	30320	--	--
mah1845	C15H16O9	Sinapoyl malate	Phenolic acids	Phenolic acids	9	9	9	39848	16009	18054	12845	9	9	9	9	9	9	9	9	32925	40726	55097	26487	23958	32449	12826	9	9	22306	34843	27657	C02887	ko00940
mah0574	C15H18O9	Caffeic acid O-glucoside	Phenolic acids	Phenolic acids	2704700	2489600	4687900	3316600	4279800	2282700	1910800	1323000	1016600	687570	515600	514830	5871500	3510000	5644100	9983800	5530800	5155000	1877200	1883800	760680	368410	535140	526210	2052300	3458700	2150300	--	--
mah2727	C19H38N2O3	Cocamidopropyl betaine	Alkaloids	Alkaloids	8435.5	8291.5	7634.9	6345.7	5068	4744.4	7609.9	4980	3441.8	5037.1	5036.1	6768.4	23846	10907	10909	8130.3	5799.1	6429.4	4230.5	5443.8	5119	5203.8	6445.9	5688.6	7794.4	7632.7	9277.3	--	--
mah0119	C12H22O11	D-(+)-TrehaloseAnhydrous	Others	Saccharides and Alcohols	221140	228710	273440	1345200	1033800	1403500	1338400	739860	1294600	1103600	1494900	1092300	418140	242630	165760	1157200	1187600	1114900	1327800	1402500	1746800	1240400	1308700	1140300	1643500	1138700	574040	--	--
mah0120	C12H22O11	D-(+)-Sucrose	Others	Saccharides and Alcohols	192380	266620	255390	1269700	1623200	1397500	1130600	1665300	1617100	1407500	1623700	459870	293520	265170	164590	2104400	990200	1877100	1291600	1267100	1172100	765320	1312000	1265800	1326200	1400300	704550	--	--
mah1707	C14H19NO9	4-Pyridoxic acid O-hexoside	Others	Vitamin	29893	38178	24181	9	20471	20788	25810	23061	24368	55602	62763	67149	83346	57118	212960	23051	34903	68986	11443	36217	38758	24003	31350	53868	45377	53886	39100	--	--
mah0273	C10H11N5O7P-	Guanosine 3',5'-cyclic monophosphate	Nucleotides and derivatives	Nucleotides and derivatives	65768	34349	28778	35702	137390	92407	22266	37760	18952	11226	2595.2	2107	85133	29540	44457	146720	209080	236640	10498	29949	26037	39085	9	6155.5	56860	53481	49963	C00942	ko00230,ko01100
mah0209	C10H14N5O7P	Adenosine 5'-monophosphate	Nucleotides and derivatives	Nucleotides and derivatives	149410	64886	123970	1745500	911180	1145900	948090	864480	649930	534360	444210	416070	97672	66814	67890	900230	2009900	1764600	1502400	1656000	1621900	371780	455780	247180	934500	768750	553400	C00020	ko00230,ko00908,ko01100,ko01110
mah0148	C10H14N5O7P	Adenosine 3'-monophosphate	Nucleotides and derivatives	Nucleotides and derivatives	26760	18689	27919	269780	279000	294640	218670	362790	257080	153500	171770	105990	13568	11536	20711	235680	181840	170380	133020	250200	286670	98644	104340	65306	211450	146730	159080	C01367	ko00230,ko01100
mah1594	C10H13N4O8P	Inosine 5'-monophosphate	Nucleotides and derivatives	Nucleotides and derivatives	153550	78949	104720	1209800	1278100	1406300	1064800	1231300	1144500	697780	1197200	1124400	61344	75122	67440	1006100	989480	854520	892180	986910	940300	734920	1107200	1273800	921160	877170	824620	C00130	ko00230,ko01100,ko01110
mah2817	C21H34O4	MAG (18:4) isomer3	Lipids	Glycerol ester	126090	174510	265160	230670	355580	188610	78139	145120	65995	74391	142110	43860	254730	366180	216790	346510	389400	232220	130040	88302	33844	91465	87766	29656	183260	174270	173080	--	--
mah3009	C21H36O4	MAG (18:3) isomer4	Lipids	Glycerol ester	215160	200970	192580	227050	287600	248980	243310	233010	177900	131830	151140	82243	222070	169270	176970	279270	264270	244310	190720	147270	94529	106430	95303	73973	223560	182390	186500	--	--
mah2856	C21H36O4	MAG (18:3) isomer2	Lipids	Glycerol ester	88200	123720	97057	90784	95429	78272	91034	88048	75396	59172	45303	55078	144720	137670	147500	23831	28675	27567	49246	50231	44893	30502	34406	27809	73802	70558	81588	--	--
mah3010	C21H36O4	MAG (18:3) isomer1	Lipids	Glycerol ester	158180	141620	138890	165030	213650	176910	172140	186600	129930	89513	105710	52593	149830	126870	139290	185290	188670	172550	135690	101220	69921	77001	67590	52305	147850	137240	127610	--	--
mah2881	C21H36O4	MAG (18:3) isomer3	Lipids	Glycerol ester	314330	432030	348110	239690	289420	255460	300220	269720	247620	171690	166230	164010	550950	537410	553320	68255	92575	82876	145000	174640	121220	146600	105360	77128	257330	248610	235130	--	--
mah2794	C21H36O4	MAG (18:3) isomer5	Lipids	Glycerol ester	1923000	2880600	2989300	3551400	4711400	3926400	4482000	3746600	3030300	2268400	1949400	1500100	4924700	4813400	5577300	828250	1203300	1233200	2473700	2535000	1616100	1164900	1328100	861240	2917000	2951800	2909600	--	--
mah2079	C16H18O9	Chlorogenic acid (3-O-Caffeoylquinic acid)	Phenolic acids	Phenolic acids	69178	25331	9	21310	72667	39399	175850	32110	40723	18991	13551	21146	33480	29807	13689	57970	41246	19086	40135	31729	2937700	218670	25021	24316	172270	180350	166600	C00852	ko00940,ko00941,ko00945,ko01110
mah2860	C21H38O4	MAG (18:2) isomer1	Lipids	Glycerol ester	29069	40965	45778	29749	45633	30570	63402	55956	48905	41181	42095	26452	83359	59498	106740	9515.9	11326	15190	67520	51258	30319	35555	42801	19090	46942	39377	44439	--	--
mah3027	C21H38O4	MAG (18:2)	Lipids	Glycerol ester	50364	43213	52680	77074	113520	75648	102280	111290	95130	71007	118800	56418	50679	39072	38072	48456	67985	48789	88719	52058	49910	89182	75784	54846	81361	66589	68577	--	--
mah2950	C21H38O4	Glyceryl linoleate	Lipids	Glycerol ester	114960	203940	220130	164950	218510	187400	231170	212010	188590	161720	159580	147290	339430	280850	354250	33222	60263	58615	157700	166590	145110	114750	115290	94760	196940	156000	184580	--	--
mah2927	C21H40O4	MAG (18:1) isomer2	Lipids	Glycerol ester	17563	47815	29261	275020	377630	277890	415910	325710	256360	247330	181200	116010	59629	48246	41204	95749	120250	118130	244850	218230	136790	170630	145230	93881	176210	183490	173780	--	--
mah2906	C21H40O4	MAG (18:1) isomer1	Lipids	Glycerol ester	23933	42695	53754	274810	338760	277080	372400	304150	237830	228810	187150	121580	42759	47462	46544	94990	108070	129570	254440	208390	140020	151630	125870	105790	198100	170510	162730	--	--
mah0439	C15H20O10	Syringic acid O-glucoside	Phenolic acids	Phenolic acids	3862000	3080900	4237200	16259000	18296000	16836000	16259000	14021000	13452000	10472000	10567000	7562900	2185400	2597800	2671900	17714000	17763000	16844000	8091800	12071000	9854700	8093800	5877900	5346000	10948000	9758800	9531200	--	--
mah0219	C10H14N5O8P	Guanosine monophosphate	Nucleotides and derivatives	Nucleotides and derivatives	7287	9	9	108150	123580	139460	117660	113330	87998	52564	48102	35270	5171.5	28590	44035	59959	103210	62382	109240	94892	75815	32746	74060	22628	47892	34306	84555	--	--
mah1596	C10H14N5O8P	Guanosine 5'-monophosphate	Nucleotides and derivatives	Nucleotides and derivatives	46610	25222	38592	399710	418400	365070	547230	423170	468700	447140	517020	230340	73825	94915	61104	219410	168620	407010	361760	376200	388260	438010	661450	277660	397980	329370	413460	C00144	ko00230,ko01100
mah1521	C16H23N5O5	iP7G	Nucleotides and derivatives	Nucleotides and derivatives	192960	153860	135710	126380	108660	150240	243110	230510	185400	208110	327360	162520	149740	210450	164420	169520	141390	167090	153470	217720	237390	150240	230310	144920	103930	111650	112230	--	--
mah2302	C17H20O9	1-O-Feruloyl quinic acid	Phenolic acids	Phenolic acids	21369	22188	12548	142660	133360	176530	253030	258270	205790	211610	297660	300470	13945	13747	12564	26497	31110	18030	132630	226640	179790	107100	242360	166060	96540	128040	138210	--	--
mah3074	C20H18O7	sesamolin	Others	Others	9	9	9	9	9	9	9	9	9	9	9	9	9	9	9	9	20.89	9	9	9	3000.6	9	9	9	1711.9	1420	1196.7	--	--
mah2789	C20H20O7	Tangeretin	Flavonoids	Flavonols	197990	182850	179400	163970	163770	169470	167090	156330	159410	161390	158000	159340	165830	168050	177190	172170	165930	165670	159800	157080	154620	167610	171010	156030	169520	169690	161960	C10190	--
mah1832	C15H19NO10	DIMBOA glucoside	Alkaloids	Alkaloids	921830	592900	765210	4318.8	16323	7781.8	6855	8603.5	8420	8651.5	7391	3290	542660	166820	1686000	9349	12140	5960.5	5922.8	9515	3472.5	11278	3467.5	1703	117860	111110	117610	C04831	ko00402
mah2197	C17H20N4O6	Riboflavin	Others	Vitamin	492880	552250	718300	277510	355210	294500	167980	112620	119970	160900	112650	103040	1989300	1216400	860040	320260	365340	229330	148030	134240	90706	86188	112330	78471	262540	378870	379810	C00255	ko00740,ko01100,ko01110,ko02010
mah0395	C14H17N5O8	N6-Succinyl Adenosine	Nucleotides and derivatives	Nucleotides and derivatives	426830	557180	787380	3425200	5134400	3729900	4512800	2750200	1954900	2109900	3105700	1428700	849780	777650	867720	1390400	1823600	2629900	3156400	3286300	1786500	3751300	3210000	1422500	2005300	2000200	1760000	--	--
mah1838	C14H17N5O8	Succinyladenosine	Nucleotides and derivatives	Nucleotides and derivatives	5188100	6908800	7263400	9215700	12772000	10032000	11352000	7405800	6344800	5660700	9504400	3936100	7028700	9062900	7067600	4239500	5079200	5078500	7065300	7584700	3502100	8304600	6451100	4127600	8715800	7838700	6330100	--	--
mah2796	C27H46O	Cholesterol	Steroids	Steroid	12498	6196.2	6318	6753.3	5180.9	5713.9	6603.6	6544.7	5099.6	5164.2	9514.6	9633.8	7245.5	7771.8	5962.7	6182.8	8236.5	7171.6	5507.5	8373.9	6793.5	6600.6	14360	6131	8900.9	8055.7	8144.4	C00187	ko00100,ko01100
mah0721	C17H22O10	1-O-beta-D-Glucopyranosyl sinapate	Phenolic acids	Phenolic acids	350090	263680	284320	2032000	2241200	958580	185760	255640	116170	36997	26903	21067	279300	244670	171980	6760000	4141400	2960400	763950	601220	198370	63692	77576	79463	1033500	866310	910290	--	--
mah2245	C19H30O8	Roseoside	Others	Others	50908	792140	97448	2567000	2589900	2094300	907420	669560	1005500	535040	337800	241460	22006	9	9	3371100	3071000	2229200	1004600	1128600	545860	228710	530660	329160	1077800	1225000	1262300	--	--
mah2236	C18H22O10	O-Sinapoyl quinic acid	Phenolic acids	Phenolic acids	9	9	9	50744	40075	73722	58378	44251	47564	41967	57968	56116	9	9	9	28766	40868	51538	62386	42750	49947	29427	49539	37927	51087	32877	20754	--	--
mah1797	C15H21N5O8	Adenosine O-ribose	Nucleotides and derivatives	Nucleotides and derivatives	185560	200190	195060	252710	221340	276240	115960	155750	89088	178470	63820	63865	189170	165370	141620	261520	341470	337100	124960	167610	107900	86504	82046	89130	176030	163510	184730	--	--
mah2765	C21H22O8	Nobiletin	Flavonoids	Flavonoid	168950	167480	167150	171820	149830	148090	158130	141800	147850	150580	145930	149910	160100	148470	155200	150160	144960	142590	153110	141260	148030	140510	141830	140730	165800	150300	136310	C10112	--
mah0056	C9H14N2O12P2	Uridine 5’-diphosphate	Nucleotides and derivatives	Nucleotides and derivatives	10426	10887	8659.5	143710	138190	116120	151860	131040	190470	115130	96915	100550	11722	6889.8	9994.2	154160	76548	86200	170730	184410	158660	88437	111060	69012	51416	67526	94149	C00015	ko00240,ko00908,ko01100
mah2806	C29H50O	β-Sitosterol	Steroids	Steroidal saponins	678040	518740	359680	441790	395310	486440	455710	496800	370900	495850	418870	328340	308410	390050	410020	293990	442460	469960	374020	482230	353260	532600	702530	523570	515740	455310	453650	C01753	ko00100,ko01100,ko01110
mah2316	C21H20O9	Daidzein-4'-glucoside	Flavonoids	Isoflavones	4107000	5590500	2737300	265930	1491000	1246700	1456300	3550300	2112200	6917800	5175000	3783100	34931000	15249000	24164000	1055300	1092200	3105600	6702800	8262600	8432900	6987900	5389000	5893100	8845900	9170700	6945300	--	--
mah2368	C21H20O10	Apigenin 7-O-glucoside (Cosmosiin)	Flavonoids	Flavonoid	193400	202630	379130	9	9	9	9	9	9	9	9	9	334140	594730	330530	18435	9	9	9	9	9	9	9	9	70903	67478	86928	C04608	ko00944
mah2370	C21H20O10	Genistein 7-O-Glucoside (Genistin)	Flavonoids	Isoflavones	181150	202000	133250	9	9	9	9	9	9	9	9	1230.5	204070	316620	209880	11080	9	9	9	9	9	9	9	9	46175	63664	48964	C09126	ko00943
mah2373	C21H20O10	Apigenin 5-O-glucoside	Flavonoids	Flavonoid	13252000	16163000	12681000	36888	171050	9	9	9	9	9	9	9	20361000	23345000	15976000	738200	388120	620600	9	443890	9	9	9	9	5433800	4749900	4982000	--	--
mah2379	C20H18O11	Quercetin 3-alpha-L-arabinofuranoside (Avicularin)	Flavonoids	Flavonols	9	9	9	9	9	9	9	9	9	9	9	9	9	9	9	309100	170560	166950	19643	38206	11670	13480	12257	12662	18076	21984	15745	--	--
mah0922	C21H22O10	Naringenin 7-O-glucoside (Prunin)	Flavonoids	Flavanols	255050	306870	346390	87513	122870	157700	232910	237180	256800	378270	415910	456510	905910	462800	750030	149150	292540	296060	300310	370730	600060	742810	506140	604320	334840	354030	372420	C09099	ko00941
mah0803	C21H22O10	Isohemiphloin	Flavonoids	Flavonoid carbonoside	160450	513190	356990	9	9	9	9	9	9	9	9	9	387450	192440	327600	77544	46201	46168	9	9	9	9	9	9	78773	78962	99241	--	--
mah0869	C20H20O11	4-C-β-D-Glucose-1,3,6-trihydroxy-7-methoxyxanthone	Others	Xanthone	30001	24398	17898	9	9	11832	17128	34780	26305	47754	60881	85459	395880	112550	114440	2971.2	12954	16485	56268	96467	87934	66732	79320	65918	105770	59849	63158	--	--
mah0948	C21H24O10	Phloridzin	Flavonoids	Chalcones	77393	133430	151730	12595	9835	11532	9367.5	4234.2	6262.8	5246.8	9	6305.2	220000	257960	154350	238750	147620	146350	11437	7191	9	6154.2	10592	7782.5	32560	23742	32676	C01604	ko00941,ko01110
mah3042	C31H40O2	Menaquinone (K2)	Others	Vitamin	5028.4	3383.6	4310.5	5648.8	4784.3	5135	4495.1	3950.5	2455.7	3062.7	3933.2	2822.7	4030.1	1874.7	2840.3	2312	2266.4	2063.8	2809.7	3615.4	53572	1352.1	5417.2	3778.1	36930	29259	25702	C00828	ko00130,ko01100,ko01110
mah2261	C21H20O11	Luteolin 6-C-glucoside	Flavonoids	Flavonoid	221110	281210	166020	2945.5	7200	7251.2	8994.8	2374	9	2390.5	2996.5	2380	172810	202940	189850	7280	4187	4147.5	1810.2	9	4793.5	9	9	9	102170	75142	87128	--	--
mah2376	C21H20O11	Kaempferol 3-O-glucoside (Astragalin)	Flavonoids	Flavonols	719850	889480	578390	7455	14818	6180	28337	12736	8010.5	22782	14670	24614	737060	737330	595660	91062	130460	151020	38330	43026	16600	9219	8618	6148	353560	311550	332890	C12249	ko00944,ko01110
mah2382	C21H20O11	Kaempferol-3-O-glucoside (Astragalin)	Flavonoids	Flavonols	1380900	1196800	1240800	12932	30782	27006	35815	21342	20987	40907	28203	46927	1294300	1204400	1363000	296670	196420	241700	45782	60813	31354	11681	22625	14114	588110	839300	595360	C12249	ko00944,ko01110
mah2385	C21H20O11	Kaempferol 3-O-galactoside (Trifolin)	Flavonoids	Flavonols	1660200	1690200	1375600	32025	28960	32324	19402	18344	14192	40225	35834	36450	1809200	1959900	1860400	585150	236020	437500	115600	94929	49205	37244	18430	5539.2	964260	863480	698630	C12626	ko00944
mah2307	C21H20O11	Luteolin 7-O-glucoside (Cynaroside)	Flavonoids	Flavonoid	11995000	12077000	17928000	457730	567090	347160	1099200	453030	2978200	1421400	2566200	2257700	41261000	38734000	38474000	9	9	9	1191500	1358000	2041100	2439900	1640300	1724600	12737000	12330000	12734000	C03951	ko00944
mah0712	C21H22O11	Eriodictyol C-hexoside	Flavonoids	Dihydroflavone	52959	87374	52566	14938	22553	22841	7677	19899	16970	9982	5970	12909	199610	182640	126710	505520	295170	341580	108260	118170	45614	30474	27132	17548	121320	142910	81050	--	--
mah2905	C21H44NO7P	LysoPE 16:0	Lipids	LPE	486520	567700	610940	956250	1095900	963460	884940	835480	592760	406710	375420	241390	840130	816190	870400	408480	364760	486780	628260	524170	393280	438790	362670	280630	780440	773930	818230	--	--
mah1315	C21H44NO7P	LysoPE 16:0 (2n isomer)	Lipids	LPE	692030	790470	831110	1073200	1319100	1207600	1061800	971600	650900	467600	438210	301630	1057900	1130400	1137600	506930	383930	558480	753530	574640	487500	424450	400680	302230	1003000	958900	887600	--	--
mah1509	C16H27NO14	Aspartic acid di-O-glucoside	Amino acids and derivatives	Amino acids and derivatives	1933100	661500	1246800	5412400	5791900	7087900	7972400	7989400	7073600	6101600	5037400	4556500	1632700	1759300	1662100	8667500	8120100	6558800	11564000	10282000	12236000	8318300	8542200	5454000	5294900	5095800	6727400	--	--
mah2377	C22H22O11	Tectoridin	Flavonoids	Isoflavones	207550	629990	71018	9	5084.3	9	9	9	9	9	9	9	58580	76197	68818	9	9	9	9	9	9	9	9	9	47372	61470	57286	C10533	--
mah2432	C22H22O11	Diosmetin-7-O-galactoside	Flavonoids	Flavonoid	6094900	16110000	2604800	53148	58957	50578	30654	30360	26113	9	9	9	1552800	1670600	1975300	9	9	9	9	9	9	9	9	9	1541100	1374500	1372000	--	--
mah2433	C22H22O11	Chrysoeriol 7-O-hexoside	Flavonoids	Flavonoid	4959000	14683000	2362600	40648	50892	61012	36271	23018	15874	9	9	9	1267800	1785500	1895200	9	9	9	9	9	9	9	9	9	1223800	1284700	1343000	--	--
mah2332	C21H20O12	6-Hydroxykaempferol-7-O-glucoside	Flavonoids	Flavonols	8740200	9	16908000	9	9	9	9	9	9	9	9	9	1009000	1236800	1338400	13538000	8958600	8885000	2405400	2366600	1738500	919650	1105600	573450	2988200	3321000	3555400	--	--
mah2331	C21H20O12	Quercetin 3-O-glucoside (Isotrifoliin)	Flavonoids	Flavonols	11101000	9	15764000	9	9	9	9	9	9	9	9	9	1287400	1151400	1401300	13358000	8629000	9197100	1990200	2330900	2117700	1195700	1030000	513170	3569700	3464800	3302300	C05623	ko00944,ko01100,ko01110
mah2802	C22H46NO7P	LysoPC 14:0	Lipids	LPC	16894	27740	16983	19446	18029	19916	12623	13688	9911.1	6873.1	3133	4032.2	32060	34765	27884	16795	14154	18607	18246	13354	9603.8	3953.6	5560.9	3413.6	15851	18282	14819	--	--
mah1907	C20H23N7O7	10-Formyl-THF	Alkaloids	Alkaloids	2553300	2736200	3240400	1650500	1982000	1523300	1378900	1673600	1326000	1527300	1020400	1669600	3804300	2530700	5961400	2631800	2149000	3107300	1705700	1491300	1415700	1135200	1065000	1051300	1868600	1706300	1879300	C00234	ko00670,ko00970,ko01100,ko01200
mah2853	C23H44NO7P	LysoPE 18:2 (2n isomer)	Lipids	LPE	33763	44589	26214	27795	42631	38425	45665	49740	28899	17284	11009	10816	51313	53075	55262	17015	16678	21889	32828	28652	19358	9727.6	11136	10418	28633	27408	24982	--	--
mah2365	C22H22O12	methylQuercetin O-hexoside	Flavonoids	Flavonols	9024500	9	11889000	9	9	9	9	9	9	9	9	9	111670	125000	150420	9	9	9	9	9	9	9	9	9	1754800	1451400	1411500	--	--
mah2360	C22H22O12	Isorhamnetin 3-O-glucoside	Flavonoids	Flavonols	9186900	9	16349000	9	9	9	9	9	9	9	9	9	148700	304080	170930	9	9	9	9	9	9	9	9	9	2182200	1711800	1751200	--	--
mah2366	C22H22O12	Selgin 5-O-hexoside	Flavonoids	Flavonoid	9480400	59652	15071000	9	9	9	9	9	9367.8	9	6649.2	9	119920	322080	173380	9	9	9	9	9	9	9	9	9	1858800	1954700	1353000	--	--
mah1318	C23H45NO7P	LysoPE 18:1 (2n isomer)	Lipids	LPE	378140	429070	459890	2971100	3615900	3086200	3951000	3612600	3099800	1363300	682180	670440	454670	450250	436550	1968200	1841600	2393900	2854100	2306600	1977800	1108500	891400	1025600	2195400	1844300	1652100	--	--
mah2816	C23H46NO7P	LysoPC 15:1	Lipids	LPC	138910	143520	113890	38429	43819	32108	19118	20780	17348	9005.3	9126.9	9410.6	199160	229760	222760	30170	20509	29590	20003	20570	11226	10221	8876.3	5916.8	57432	56512	57834	--	--
mah1330	C23H46NO7P	LysoPE 18:1	Lipids	LPE	434710	448370	478590	3197500	3803400	3279400	4178800	3833200	3290400	1430000	742730	699280	468150	483170	451380	1998800	1912900	2482800	3044200	2360000	2023600	1171100	935020	1023100	2241200	1995600	1793700	--	--
mah2920	C23H46NO7P	LysoPE 18:1(2n isomer)	Lipids	LPE	313890	360060	417480	2627400	3296000	2765000	3492600	3295300	2863600	1338100	807970	617900	396080	426540	365320	1680500	1575000	2204800	2837500	2252800	1976500	1149200	845670	986460	1851800	1813400	1606800	--	--
mah2933	C23H48NO7P	LysoPE 18:0(2n isomer)	Lipids	LPE	2993.4	3617.5	3652	31597	31444	24244	39015	35045	36030	13770	8288.1	6190.5	5183	3085	3522.6	17214	14199	20581	29409	20347	17747	9203.9	8847	10215	18575	15078	14865	--	--
mah2844	C23H48NO7P	LysoPC 15:0	Lipids	LPC	32163	33571	31402	28195	31845	29609	13204	16440	8074.6	5575	4800.6	4364.1	51316	40695	92927	25501	20785	28400	8607.2	9185.1	6636.6	4186	5582.5	3076.5	29804	28141	35156	--	--
mah2138	C24H26O11	Anisic acid O-feruloyl hexoside	Phenolic acids	Phenolic acids	84315	109510	92330	212180	191660	210620	227810	308430	366470	385200	322430	303380	41105	32988	54744	26186	40836	47456	135940	128700	201350	156290	155370	161320	148180	223050	106130	--	--
mah2777	C24H46NO7P	LysoPC 16:2 (2n isomer)	Lipids	LPC	47186	60053	31289	10104	8989.6	13480	8915.1	15252	8979.1	11687	5614.8	6984.3	70084	66853	74523	4531.9	3107.6	7465.7	9287.1	9407.3	11423	7204.7	5720.8	5857.5	22198	16010	14727	--	--
mah2847	C24H48NO7P	LysoPC 16:1	Lipids	LPC	53280	70395	42025	76373	73667	82889	65935	74002	57365	49282	52732	36463	82281	86472	68294	35089	41766	65300	74172	50749	41870	42276	47864	46130	69203	60055	56720	--	--
mah2818	C24H48NO7P	LysoPC 16:1 (2n isomer)	Lipids	LPC	60058	108050	52538	87015	71685	103790	73721	73807	69723	56620	32306	30439	102470	110640	119220	50661	54434	86088	75071	63428	50549	32130	38168	34653	65271	65349	58546	--	--
mah2910	C24H50NO7P	LysoPC 16:0	Lipids	LPC	870860	1127400	971460	1133000	1303400	1518400	1152500	1222900	854770	584050	509940	296840	1840000	1904700	1995900	536650	535720	621110	1066800	951050	611820	546440	448110	282330	1260400	1251000	1257600	--	--
mah2916	C24H50NO7P	LysoPC 16:0 (2n isomer)	Lipids	LPC	829180	1045000	980580	1205000	1238900	1344400	1128600	1141800	822780	580800	524250	273840	2012900	1912200	2060400	538640	522890	603140	1144300	1008200	596270	563980	452350	292750	1292100	1312700	1207200	--	--
mah2350	C24H22O12	Malonyldaidzin	Flavonoids	Isoflavones	9742.5	9767.5	6294.5	9	4002	4105.5	14994	24146	6983.8	64218	56820	60570	78830	14448	24591	5955	17819	30954	22522	98982	71874	53507	69044	48464	41028	28818	35583	C16191	ko00943
mah0123	C18H32O16	raffinose	Others	Saccharides and Alcohols	31516	15963	47856	19302	63291	33455	55769	95275	132030	148510	450060	228310	17162	16070	13520	20724	32034	13795	108920	147600	95786	323700	145130	217860	70669	79133	73062	C00492	ko00052,ko01100,ko02010
mah0137	C18H32O16	D(+)-Melezitose	Others	Saccharides and Alcohols	13940	13811	15560	41924	63456	26685	49784	48818	93431	82522	102740	87790	8195	18868	2595.5	59417	48742	55855	64749	83408	45242	64581	96278	73460	26714	45878	35298	--	--
mah2393	C23H24O13	Syringetin 5-O-hexoside	Flavonoids	Flavonoid	9	9	9	9	9	9	9	9	9	9	9	9	18724	11672	14571	296370	226430	254710	87538	99519	48157	67613	48393	58887	56059	62749	63264	--	--
mah2970	C25H52NO7P	LysoPC 17:0	Lipids	LPC	8500.9	12924	14227	15786	18000	16396	10025	8964.8	6843.1	5200.3	5709.6	4151.8	19339	13163	29651	11371	9695.4	11427	14387	8967.3	8156.4	8027.7	5581.6	2845.7	14586	17751	19340	--	--
mah2801	C26H48NO7P	LysoPC 18:3 (2n isomer)	Lipids	LPC	21506000	25454000	16658000	9556500	11091000	9825700	5751600	7208100	4560200	3040800	2486700	2243400	28943000	32158000	31636000	11103000	8529200	9391200	5271400	5218400	3863300	1915100	2012300	2176800	11420000	10453000	9770500	--	--
mah2909	C26H48NO7P	LysoPC 18:3	Lipids	LPC	59587	69045	67672	80453	92903	94258	74479	90453	71619	50272	35233	26260	105820	109070	108230	46932	42994	46815	83372	72484	50901	37263	37752	25187	102170	98811	82473	--	--
mah2908	C21H48N3O9P	Bis(N,N-diethylethanaminium)-2-acetamido-1,5-anhydro-2-deoxy-1-[-hydroxy(phosphonato)methyl]-D-glucitol	Alkaloids	Alkaloids	52122	66334	66328	94709	104080	112970	84676	91951	69580	44477	44845	23528	111780	124680	118670	50004	52116	56140	105140	70282	55711	57811	41775	28907	105470	100210	104190	--	--
mah0723	C24H38O12	(6S,7E,9R)-6,9-Dihydroxy-4,7-megastigmadin-3-one-9-O-D-xylopyranosyl(1-6)-glucopyranoside	Others	Others	24262	16025	23740	355480	257410	397100	444390	347150	272390	247920	221540	246500	38140	27737	66000	106750	152090	121470	311680	297830	230020	267330	122010	196590	247110	212660	193540	--	--
mah2839	C26H50NO7P	LysoPC 18:2 (2n isomer)	Lipids	LPC	1787600	2359400	1606400	1171400	1338500	1259600	1081500	1366200	958620	605150	450440	541350	2925600	2921300	2718500	592730	641290	744870	1001700	880300	734970	373680	327160	420790	1201700	1064700	1038100	--	--
mah2862	C26H50NO7P	LysoPC 18:2	Lipids	LPC	118800	178800	113460	92047	91423	102330	77634	89559	71919	40323	35124	33044	194610	228400	190370	40002	48636	50716	71599	66808	58967	30041	24076	29545	94092	78708	69660	--	--
mah2486	C24H24O13	Naringenin O-malonylhexoside	Flavonoids	Flavanols	147430	233930	203600	135510	183980	313140	373660	609960	449510	745390	708690	720500	887750	106700	514510	151950	353590	1138100	947020	1054400	1145800	1006900	937040	1056000	686820	570120	530810	--	--
mah2938	C26H52NO7P	LysoPC 18:1	Lipids	LPC	42395	60289	58185	312720	304930	295070	396660	398570	457250	204380	96212	108170	58551	82472	74625	186120	192500	203010	521240	353420	307290	133950	98775	130720	220420	210390	189550	--	--
mah2945	C26H52NO7P	LysoPC 18:1 (2n isomer)	Lipids	LPC	1647800	2144800	1725400	9688900	9470700	9566400	13098000	11944000	13320000	6009400	3477400	3198400	2161300	2698900	2401400	5417000	6449100	7106000	15613000	10783000	10621000	4216500	3440500	4569100	7385600	6865400	6522200	--	--
mah2922	C26H54NO7P	LysoPC 18:0 (2n isomer)	Lipids	LPC	27003	35906	29781	165010	158770	145970	202760	194800	214650	96511	50320	49252	35442	40221	39744	79615	96580	113350	235940	184500	143530	74524	52107	67819	119230	117020	95709	--	--
mah2999	C26H54NO7P	LysoPC 18:0	Lipids	LPC	781990	1076200	1004700	943220	1273200	893810	820050	728220	559750	388420	316460	185080	1678500	1726700	1736500	444490	335090	375300	604530	530780	403460	461560	281720	180470	1099600	1046600	1144300	--	--
mah2857	C28H48NO7P	2-Hydroxy-5,8,11,14,17-icosapentaenoyloxy]propyl-2-(trimethylammonio)ethyl phosphate	Alkaloids	Alkaloids	251920	310560	205230	198210	209850	202030	168140	182490	143680	77599	72103	70461	342470	364190	339900	82189	82600	112270	182400	138210	111410	54921	54880	81340	190030	148250	150900	--	--
mah2936	C28H50NO7P	Propyl2-(trimethylammonio)ethyl phosphate	Others	Others	141950	161810	150110	953430	964970	942850	1302100	1205100	1424000	573370	307710	296410	183130	205150	188980	488900	550240	747140	1619500	1159800	1082900	436460	335310	482470	760020	688400	649060	--	--
mah2944	C28H50NO7P	LysoPC 20:4	Lipids	LPC	140960	184340	154080	909610	908820	868710	1218600	1188800	1490100	586540	328500	289510	189810	194490	149540	484940	504390	643170	1527700	1111000	969600	410280	292150	425520	735970	620410	604220	--	--
mah2552	C25H24O14	Diosmetin-7-O-(6'-O-malonyl)-β-D-glucoside	Flavonoids	Flavonoid	119890	288240	240880	9	9	9	9	9	9	9	9	9	9	9	19004	9	9	9	9	9	9	9	9	9	24372	25763	18947	--	--
mah3015	C28H56NO7P	LysoPC 20:1	Lipids	LPC	55077	83074	54705	65582	77280	71823	64890	63803	53171	28027	17643	14896	131410	116570	149330	46928	40615	50081	47599	35580	35638	19813	18455	16963	59997	64641	50364	--	--
mah2519	C24H22O15	Tricetin O-malonylhexoside	Flavonoids	Flavonoid	199250	920380	142710	9	9	9	9	9	9	9	9	9	9	9	9	9	9	9	9	9	55080	9	9	9	56082	55376	69310	--	--
mah2470	C27H30O13	Glycyroside	Flavonoids	Isoflavones	1534900	1163100	1326300	3522	11211	14138	12383	2935.8	5429.5	7621.5	3129.2	10335	9	9	9	2548.5	7686.2	18703	9	20380	36264	7453.8	15772	10427	157400	228930	188600	--	--
mah2336	C26H28O14	C-hexosyl-apigenin O-pentoside	Flavonoids	Flavonoid carbonoside	161910	191090	171410	9266.2	28290	37192	22092	56212	47667	96406	124620	111260	216960	398800	135960	56231	409740	496100	74518	256670	397110	275130	496060	365710	119640	132880	112080	--	--
mah0208	C15H24N2O17P2	Uridine 5'-diphospho-D-glucose	Nucleotides and derivatives	Nucleotides and derivatives	4371600	3284900	3719900	16733000	6010500	11354000	9841800	11416000	7655000	7222200	8230700	8578200	3112900	1147300	1863400	12788000	11082000	11876000	9752800	8118500	10188000	7316400	7800700	10594000	8514400	9094100	7519700	C00029	ko00040,ko00052,ko00053,ko00240,ko00500,ko00520,ko00561,ko00908,ko01100,ko01110
mah2148	C30H24O12	Procyanidin A3	Tannins	Proanthocyanidins	17228	16502	13878	28402	54240	44259	21800	30507	27823	13908	15274	21217	9	9	9	12390	5903	9	9	9	9	9	9	9	12626	14064	8508	--	--
mah2320	C30H24O12	Procyanidin A1	Tannins	Proanthocyanidins	24715	5661.2	26784	9	9	9	9	9	9	3176.2	9	9	53296	44654	37762	9	9	9	9	9	9	9	9	9	8127.5	5054.8	6734	--	--
mah2318	C30H26O12	Procyanidin B2 isomer	Tannins	Proanthocyanidins	107030	85676	56171	9	9	9	3194.2	9	9	9	9	9	109000	160940	82190	9	9	9	9	9	9	9	9	9	18350	23120	28721	--	--
mah2149	C30H26O12	Procyanidin B2	Tannins	Proanthocyanidins	13240	18586	11973	63140	59077	55158	42358	38242	25307	12591	7266	9313.5	9	9	4519.8	9	9	9	9	9	1341	9	9	9	18583	11408	9850.2	--	--
mah2013	C27H30O14	Daidzein-dihexside	Flavonoids	Isoflavones	9342.5	13995	10317	9	8430.8	5612.5	10303	32761	28099	54184	56164	30776	279800	70965	38147	9873.3	13136	37432	83825	86267	148110	129160	93460	173800	75696	98218	58339	--	--
mah3063	C40H56O3	Capsanthin	Others	Others	529640	525610	520580	474060	498370	501590	492670	495490	490950	480760	478150	496080	531590	488760	466270	475380	479260	466410	476500	465800	474840	475020	463530	479180	539140	479630	468930	C08584	ko00906
mah2118	C27H30O15	Hydroxydaidzein-dihexside	Flavonoids	Isoflavones	163500	238700	405810	9	9	9	9	9	9	9	9	9	569590	742600	384250	2818.5	9	9	9	9	9	9	9	9	124490	81756	91864	--	--
mah2304	C27H30O15	Kaempferol 3-O-rutinoside (Nicotiflorin)	Flavonoids	Flavonols	2359700	1954800	2093200	48700	69330	49382	81365	25052	28063	32906	11907	44626	2335700	2239600	2281800	86701	48002	43984	21384	29984	10814	10779	2966.2	11920	916310	931650	990320	--	--
mah0814	C27H30O15	Kaempferol 3-O-robinobioside (Biorobin)	Flavonoids	Flavonols	26279000	25898000	22727000	488080	689440	610670	642890	351330	378070	453180	468590	725290	28140000	31103000	30671000	8389400	5562700	5316800	1624800	1787700	835130	513890	394700	388730	14967000	15904000	13856000	--	--
mah2054	C28H32O15	glycitein-dihexside	Flavonoids	Isoflavones	2587.5	853.5	9	9	9	9	9	9	3372	15390	28396	10311	9508.2	6893.8	5056.8	2498.2	9	9	5033.2	2560.5	42037	48058	55552	65362	6008.2	14836	14943	--	--
mah2293	C27H30O16	Quercetin 3-O-rutinoside (Rutin)	Flavonoids	Flavonols	1632300	7393000	2082500	7003	10152	7620	9	9	9	9	9	9	71011	69970	52343	9	9	9	9	9	11870	9	9	9	426650	303510	414900	C05625	ko00944,ko01100,ko01110
mah0790	C27H30O16	Quercetin-3-O-robinobioside	Flavonoids	Flavonols	5624000	19353000	5005000	35401	19568	17007	6523	6992.2	2854.5	7610.5	1776	1777	364050	328590	401190	14675	11133	5307.8	5947.5	4108.2	9	2919.2	1175	2358	1458000	1460700	1130900	--	--
mah2361	C28H34O15	Hesperetin 7-rutinoside (Hesperidin)	Flavonoids	Dihydroflavone	1690800	6265100	1689400	9	9	9	9	9	9	9	9	9	90250	48475	90592	9	9	9	9	9	9	9	9	9	418570	396670	361070	C09755	--
mah2363	C28H32O16	2'-Hydoxy,5-methoxy Genistein-O-rhamnosyl-glucoside	Flavonoids	Isoflavones	10203000	22554000	9796600	348760	348570	283060	125400	114160	99051	34077	33458	32168	280890	356440	211410	15469	9	9	9	9	9	9	9	9	2687200	3794700	3016500	--	--
mah2749	C36H58O9	3-O-glucuronide soyasapogenol B	Terpenoids	Triterpene Saponin	55582	61825	43071	9027.7	16813	8804.7	10747	10158	16109	20352	22943	16781	145700	87758	130170	29120	13643	33131	13720	14190	15989	26831	19588	16725	45276	44487	40549	--	--
mah1599	C21H27N7O14P2	Nicotinic acid adenine dinucleotide	Nucleotides and derivatives	Nucleotides and derivatives	112640	91069	251730	1129100	1451100	1811900	1498400	709570	1871300	1451600	2926900	1627200	42859	70736	141180	1346200	888290	1180300	1190800	2644500	1305000	2049700	1497900	1507900	1223100	1439400	1350400	C00003	ko00190,ko00730,ko00760,ko01100
mah2898	C31H61O14N	3-Hydroxypropyl palmitate glc-glucosamine	Alkaloids	Alkaloids	20423	22630	37200	13239	22835	16811	14264	18611	13235	10097	7242.4	2993.2	57205	49912	52867	2356.5	1830.9	5678.6	9637.5	6282.5	4099	3629.7	6449.4	1101.3	27191	21394	24948	--	--
mah2899	C33H56O14	2,3-Dihydroxypropyl-9,12,15-octadecatrienoate-hexose-hexose	Lipids	Free fatty acids	79482	105690	115440	39830	69262	79948	72274	76851	59826	39345	37378	24592	167010	156830	207600	17970	26092	29073	35644	34284	29985	29627	26125	16168	94476	104920	81583	--	--
mah2845	C33H58O14	2,3-Dihydroxypropyl-9,12-octadecadienoate-hexose-hexose	Lipids	Free fatty acids	808.03	3006.3	4378.1	4601.5	6366.3	4522.1	8460.8	7058.4	5226.2	4503.6	3932.3	3233.9	5202.8	4762.5	6304	582.61	2542.5	1045.5	6929.5	5214.1	3361.8	6603.9	3825.3	1517.9	6020.9	2535.8	4077.7	--	--
mah0196	C21H28N7O17P3	NADP	Nucleotides and derivatives	Nucleotides and derivatives	60942	49777	99679	430350	615870	430210	430610	595910	859180	573840	424380	420580	25767	52308	19096	439130	387590	418330	393900	363290	317550	286340	246940	270160	377330	358060	376660	C00006	ko00195,ko00480,ko00760,ko01100
mah2837	C42H64O12	Soyasaponin γa	Terpenoids	Triterpene Saponin	41284	28063	21012	7296	5207.6	11419	15310	18793	15274	12000	12775	17272	205570	199510	110190	9	9	9	6932.4	9059.1	10401	11725	8996.7	9370.5	29610	28237	28034	--	--
mah1233	C41H64O13	Oleanolic acid-3-O-β-D-pyran xylose(1→3)-β-D-pyran glucuronide	Terpenoids	Triterpene Saponin	24258	58076	37749	19837	34594	36557	61678	71151	105140	156880	186190	169670	271820	97824	133930	32032	12545	37220	51404	53877	61088	148370	99773	54891	100640	101830	102990	--	--
mah2751	C41H66O13	Soyasaponin IV	Terpenoids	Triterpene Saponin	96197	96897	46922	16019	16425	13017	17996	14185	32234	35246	43570	36212	303080	108500	253590	35308	16981	47198	20819	23967	25499	62032	45969	35170	78809	93596	66271	--	--
mah0569	C27H33N9O15P2	Flavin adenine dinucleotide(FAD)	Nucleotides and derivatives	Nucleotides and derivatives	171820	109040	193620	683530	865350	867050	1194600	959100	484530	550590	628880	540190	106680	132010	133780	1182000	741110	968280	672430	519600	592760	447770	475860	492230	487530	505600	547920	C00016	ko00740,ko01100,ko01110
mah2738	C42H68O14	Soyasaponin βb'	Terpenoids	Triterpene Saponin	161850	204510	148350	97537	101550	120450	146030	148220	156790	203930	196330	145950	660920	418400	602880	127600	73313	106040	112600	126180	160460	201150	134330	104410	204010	214130	236290	--	--
mah2737	C42H68O14	Soyasaponin III	Terpenoids	Triterpene Saponin	547060	659090	570730	304240	390110	358940	560530	467890	608040	725960	744730	543200	2198500	1736400	2105000	367460	299590	410780	399240	489530	478740	867700	569520	342170	758510	811130	698670	C19865	--
mah0791	C45H38O18	Catechin-catechin-catechin	Flavonoids	Flavanols	17787	17148	12558	29878	34080	49348	32860	18858	24536	11716	9	16512	9	9	9	9	9	9	9	9	9	9	9	9	12936	10604	8773.5	--	--
mah2729	C47H76O17	Soyasaponin βc	Terpenoids	Triterpene Saponin	180190	177360	119920	32953	36438	34857	40341	27027	62086	81702	77561	64177	377820	166950	301950	87811	42646	151930	43950	92427	77007	179710	106280	83766	163620	146170	135530	--	--
mah2782	C48H74O17	Soyasaponin γg	Terpenoids	Triterpene Saponin	878960	859180	700230	667720	668750	736190	985920	988850	1123500	1232800	1117700	1209600	1024200	1046900	893870	238310	278190	282390	760960	824490	932790	1014200	900160	946850	947280	940490	933260	--	--
mah2759	C48H76O18	Soyasaponin βe	Terpenoids	Triterpene Saponin	124960	187210	142530	51007	98818	137020	238140	286660	415960	679820	743370	752410	571940	237620	512890	56283	39419	113310	68891	106130	198010	278210	157480	81726	195350	192070	186210	--	--
mah2716	C48H78O18	Soyasaponin βb(Soyasaponin I)	Terpenoids	Triterpene Saponin	915970	1097500	870960	647680	876450	697120	868780	1058300	974410	1093100	1284400	906770	2309500	2459500	2553000	751310	550540	736700	690180	1053000	878060	1337000	869720	783250	1385800	1338900	1543200	--	--
mah2753	C48H76O19	Soyasaponin βd	Terpenoids	Triterpene Saponin	9677.7	16158	17075	15554	27034	36107	53816	48754	84493	180040	206010	202330	32165	21467	40638	19514	18062	37372	13113	33692	83397	55219	27452	17159	35902	32397	37873	--	--
mah2708	C48H78O19	Soyasaponin βa	Terpenoids	Triterpene Saponin	125020	133200	117300	123220	147260	127000	133420	145330	116410	201210	168760	135110	236680	220860	263270	219070	177860	207240	137960	191890	187990	161640	129120	83181	173400	176520	146530	--	--
mah2771	C53H82O20	Soyasaponin βα	Terpenoids	Triterpene Saponin	353030	292010	239830	26220	32046	32910	53218	55827	94083	95040	123520	110100	236030	209070	177900	34986	20172	16903	68172	78396	80834	137030	94649	149100	144310	123730	151330	--	--
mah2775	C53H82O21	Soyasaponin αa	Terpenoids	Triterpene Saponin	42093	35046	31613	39985	40277	35955	49335	67766	66033	60937	64721	63687	58443	53362	42454	16365	17734	15976	39057	56469	43024	49641	55740	51473	55414	53844	52775	--	--
mah2763	C54H84O21	Soyasaponin βg	Terpenoids	Triterpene Saponin	448420	494050	401100	380270	402960	389980	529920	586040	575980	646400	606990	637280	527960	640400	423920	156470	164990	206540	444540	475450	530800	497730	555760	485160	538590	576960	468840	--	--
mah2678	C53H84O22	Oleanolic acid-O-Hexoside-O-Pentoside-O-Hexoside-O-Hexoside	Terpenoids	Triterpene Saponin	9	9	9	9	9	9	9	9	9	9	9	9	9	9	9	6227.8	7595.2	6374.8	13898	14878	17008	14418	14431	16936	4789.3	5636.7	4704.1	--	--
mah2757	C54H84O22	Soyasaponin αg	Terpenoids	Triterpene Saponin	130920	127620	83731	152290	174800	203770	221620	252990	227090	315250	377500	309990	110750	105390	94746	146280	143960	124140	184660	231470	261590	217960	208740	275060	220280	242530	206680	--	--
mah1378	-	linolenate (18:3n3 or 6)	Lipids	Free fatty acids	152170	181140	200170	241720	262630	232160	237430	247940	210390	184100	183240	153600	233350	192620	190810	224680	237870	222280	226590	198650	158610	164360	158580	146510	199300	217920	201800	--	--
mah2612	-	Soyasaponin Bx	Terpenoids	Triterpene Saponin	2716.6	8400.9	5369.9	8669.1	6159.9	11605	6504.4	8519.8	8085.9	9093.4	6873.7	6421.4	7101.7	5824.3	15167	15282	16634	13972	10272	8673.4	9095.4	5213.6	6502	6084.3	9522.9	10955	8210.3	--	--
mah2635	-	soyasapogenol A3	Terpenoids	Triterpene Saponin	9	9	9	19501	18823	16546	40222	30942	31955	33679	34588	27324	9	9	9	4263.6	6972.1	8970.4	35300	28982	35799	32640	22556	27158	19385	20250	15350	--	--
mah2697	-	Soyasaponin A0γg	Terpenoids	Triterpene Saponin	9	9	9	9	9	9	9	9	9	9	9	9	9	9	9	68334	100880	91448	160630	157390	179420	178910	188090	190070	72605	75643	81880	--	--
mah2702	-	soyasaponin Be isomer	Terpenoids	Triterpene Saponin	26534	31816	26650	20426	23076	23088	35921	37254	51892	52408	52573	56480	35349	40955	25675	5951.4	10483	8401.8	32250	20477	34893	38182	31500	32631	30189	26448	32388	--	--
mah2750	-	Soyasaponin Bc′	Terpenoids	Triterpene Saponin	5817.6	5420.7	4246.7	762.09	1329.4	1188.2	2849.8	2213.9	2783.2	4073.8	2221.1	2386.7	16765	7488	19167	3439.8	1335.9	4996.1	1204.4	3819.1	2604.6	5146.2	3487.4	2912.2	4960	6307.1	6101.5	--	--
