# Supplementary material for: Using transcriptomic and metabolomic data to investigate the molecular mechanisms that determine protein and oil contents during seed development in soybean
Source: Front Plant Sci. 2022 Sep 29;13:1012394. doi: 10.3389/fpls.2022.1012394 (PMC9557928; doi:10.3389/fpls.2022.1012394)
Supplement: Supplementary file 2 [file Table_2.xlsx]

## Sheet: Sheet1
Table S2. Differentially accumulated metabolites detected
NPS233-1 vs NPS233-2	NPS233-1 vs NPS233-3	NPS233-1 vs NPS233-4	NPS301-1 vs NPS301-2	NPS301-1 vs NPS301-3	NPS301-1 vs NPS301-4	NPS301-1 vs NPS233-1	NPS301-2 vs NPS233-2	NPS301-3 vs NPS233-3	NPS301-4 vs NPS233-4
mah1618	mah1528	mah1618	mah1528	mah1618	mah1618	mah1935	mah1935	mah2308	mah2308
mah1503	mah1494	mah1528	mah1503	mah1503	mah1528	mah1772	mah2308	mah1700	mah1574
mah1524	mah1503	mah1503	mah1524	mah1524	mah1494	mah2309	mah1686	mah0399	mah2112
mah1460	mah1524	mah1524	mah1460	mah1460	mah1503	mah1708	mah0168	mah1739	mah2705
mah1624	mah1460	mah1460	mah1935	mah1865	mah1524	mah1931	mah1538	mah2116	mah0817
mah2308	mah1624	mah1514	mah0263	mah2308	mah1460	mah2686	mah0755	mah2431	mah2534
mah0175	mah0364	mah1553	mah0267	mah0175	mah1553	mah1651	mah1536	mah2039	mah1859
mah1686	mah2308	mah0364	mah0265	mah1686	mah1865	mah2146	mah2116	mah2146	mah2689
mah1603	mah0175	mah1781	mah2308	mah1603	mah2308	mah1717	mah2112	mah2338	mah0318
mah1574	mah1686	mah1772	mah0175	mah1570	mah0175	mah2338	mah1614	mah2234	mah2176
mah1570	mah1603	mah1865	mah1686	mah0168	mah1686	mah1929	mah0079	mah1853	mah2262
mah0168	mah2030	mah2308	mah1603	mah1619	mah2030	mah1930	mah0212	mah2567	mah0705
mah1619	mah1700	mah0175	mah1574	mah1617	mah1570	mah0817	mah0200	mah2569	mah0344
mah1617	mah1619	mah1686	mah0399	mah0399	mah0168	mah2004	mah2431	mah1738	mah3040
mah0399	mah0399	mah1570	mah1534	mah1534	mah1619	mah0834	mah2194	mah2176	mah2079
mah1534	mah1534	mah1619	mah1538	mah1538	mah1617	mah2567	mah2039	mah1791	mah0721
mah1538	mah1538	mah1617	mah0755	mah0755	mah0399	mah2569	mah0272	mah0705	mah2379
mah0755	mah0755	mah1536	mah1536	mah1536	mah1534	mah2689	mah0405	mah0503	mah2261
mah1536	mah1536	mah0141	mah0141	mah0141	mah1538	mah0318	mah1608	mah1845	mah2376
mah0141	mah0221	mah0221	mah1591	mah1591	mah1536	mah2176	mah1571	mah0721	mah2382
mah1739	mah1739	mah1739	mah1739	mah1739	mah0141	mah2588	mah0167	mah2316	mah0712
mah2116	mah1613	mah1613	mah2309	mah2309	mah1739	mah1791	mah1522	mah2379	mah2332
mah2309	mah2116	mah2112	mah2112	mah2112	mah2309	mah0705	mah2146	mah0869	mah2331
mah2205	mah2112	mah0575	mah0575	mah0575	mah2112	mah1464	mah0902	mah2385	mah2138
mah0575	mah2205	mah0079	mah1708	mah1708	mah2205	mah1707	mah0077	mah0712	mah2393
mah0079	mah0575	mah1995	mah0212	mah0212	mah0575	mah2860	mah1929	mah2432	mah2336
mah0091	mah1427	mah0212	mah0091	mah0506	mah0079	mah0219	mah1930	mah2433	mah2148
mah1458	mah0212	mah0506	mah1458	mah0505	mah1995	mah1596	mah1853	mah2332	mah2149
mah0086	mah0091	mah1458	mah0086	mah1458	mah0212	mah2197	mah2484	mah2331	mah2013
mah0172	mah1458	mah1546	mah0172	mah0086	mah0506	mah2245	mah1675	mah2350	mah2304
mah1580	mah1546	mah0086	mah1580	mah0172	mah0505	mah2316	mah0275	mah2393	mah2054
mah0097	mah0086	mah1580	mah0097	mah1580	mah0507	mah0922	mah2004	mah2486	mah2363
mah0281	mah0172	mah0097	mah0281	mah0097	mah1458	mah0869	mah2400	mah2336	mah0791
mah1558	mah1580	mah1558	mah1558	mah1558	mah1546	mah2307	mah2567	mah2148	mah2759
mah2431	mah0097	mah0200	mah2194	mah0200	mah0086	mah0712	mah2569	mah2149	mah2753
mah2194	mah1558	mah2194	mah1461	mah1461	mah1580	mah2432	mah2176	mah2013	mah2678
mah1461	mah0200	mah1461	mah1931	mah1931	mah0097	mah2433	mah1680	mah0814	mah2697
mah0215	mah1461	mah0215	mah0215	mah0215	mah1558	mah2138	mah1679	mah2054
mah1723	mah0215	mah2039	mah1723	mah1723	mah0200	mah2916	mah1791	mah2363
mah1526	mah1723	mah1723	mah0272	mah0272	mah1461	mah2350	mah0705	mah2898
mah1730	mah0272	mah0272	mah1730	mah1730	mah1931	mah0123	mah1347	mah2899
mah0072	mah1730	mah0072	mah0072	mah0072	mah0215	mah2393	mah0344	mah0791
mah2686	mah0072	mah2686	mah2686	mah2686	mah1723	mah0723	mah0343	mah2759
mah0627	mah2686	mah1773	mah0627	mah0627	mah0272	mah2552	mah0372	mah2678
mah2137	mah0627	mah2137	mah2137	mah2137	mah0072	mah3015	mah0574	mah2697
mah1608	mah2137	mah0087	mah0405	mah0405	mah2686	mah2519	mah0273
mah0058	mah0405	mah1776	mah1608	mah1572	mah0627	mah2470	mah2856
mah1651	mah1572	mah0405	mah1571	mah1571	mah2137	mah2148	mah2881
mah1522	mah0058	mah1572	mah0167	mah0058	mah0405	mah2320	mah2794
mah0567	mah1651	mah1571	mah0058	mah1522	mah1572	mah2149	mah2860
mah0085	mah1522	mah0058	mah1522	mah0567	mah1571	mah2013	mah2950
mah1717	mah0567	mah0567	mah0567	mah0085	mah0058	mah2118	mah2927
mah0228	mah0090	mah0090	mah0085	mah1595	mah1522	mah2054	mah2906
mah1495	mah0085	mah0085	mah1595	mah1531	mah0567	mah2293	mah2302
mah0222	mah1531	mah0228	mah1531	mah1717	mah0090	mah0790	mah0395
mah0214	mah0228	mah1495	mah1717	mah0228	mah0085	mah2361	mah1838
mah0210	mah1495	mah2047	mah0228	mah1495	mah1595	mah2363	mah0721
mah0096	mah0222	mah0222	mah0958	mah0222	mah1531	mah2749	mah2379
mah2418	mah0214	mah0214	mah1495	mah0214	mah1717	mah0196	mah0922
mah0902	mah0210	mah0210	mah0222	mah2338	mah0228	mah2837	mah0803
mah0685	mah2418	mah0685	mah0214	mah0210	mah1495	mah1233	mah0948
mah1853	mah0685	mah2219	mah2338	mah0685	mah0222	mah2751	mah3042
mah2219	mah2234	mah0771	mah0210	mah1929	mah0214	mah2738	mah2376
mah0771	mah1853	mah2296	mah2418	mah1930	mah2338	mah2737	mah2382
mah2296	mah2219	mah2484	mah0902	mah1853	mah0210	mah0791	mah2385
mah2484	mah0771	mah0275	mah1929	mah2219	mah2418	mah2759	mah2307
mah0817	mah2296	mah2534	mah1930	mah0771	mah0902	mah2716	mah0712
mah2534	mah2484	mah0813	mah1853	mah2296	mah0685	mah2753	mah2905
mah1615	mah2534	mah1615	mah2219	mah2484	mah1930	mah2750	mah1315
mah2400	mah1615	mah0231	mah0771	mah2534	mah2219		mah2432
mah1586	mah0231	mah0229	mah2296	mah1615	mah0771		mah2433
mah0231	mah0229	mah2225	mah2484	mah1586	mah2296		mah2332
mah0229	mah2225	mah0834	mah2534	mah1798	mah2484		mah2331
mah1539	mah0834	mah2567	mah1615	mah0231	mah0275		mah2138
mah2567	mah2567	mah2569	mah2400	mah0229	mah1615		mah2777
mah2569	mah2569	mah2689	mah1586	mah2225	mah0231		mah2910
mah2689	mah2689	mah1525	mah1798	mah0834	mah0834		mah2916
mah1525	mah1525	mah1738	mah0231	mah2567	mah2567		mah2393
mah0061	mah0061	mah1209	mah0229	mah2569	mah2569		mah0723
mah0318	mah0318	mah0932	mah0834	mah2689	mah2689		mah2862
mah1738	mah1738	mah2176	mah2567	mah1525	mah1525		mah2999
mah1209	mah1209	mah2875	mah2569	mah0318	mah0318		mah2857
mah0932	mah0932	mah2874	mah2689	mah1738	mah1738		mah2336
mah2176	mah2875	mah1409	mah1525	mah1209	mah1209		mah2149
mah2934	mah2874	mah2588	mah0318	mah0932	mah0932		mah0814
mah1990	mah0615	mah1791	mah1738	mah2588	mah1680		mah2293
mah1680	mah2588	mah2262	mah2588	mah1791	mah2588		mah0790
mah2588	mah1791	mah2745	mah1791	mah2262	mah1679		mah2363
mah1679	mah2262	mah1281	mah2262	mah2745	mah1791		mah2749
mah2262	mah2745	mah2080	mah2745	mah0062	mah2262		mah2898
mah2745	mah0062	mah1347	mah0062	mah2080	mah2080		mah2899
mah0062	mah1281	mah0344	mah2080	mah1347	mah1347		mah2845
mah2947	mah1338	mah0503	mah1607	mah0344	mah0344		mah2837
mah1319	mah1356	mah0343	mah1347	mah0503	mah0503		mah2751
mah1607	mah1319	mah0805	mah0344	mah0343	mah0343		mah0791
mah2050	mah1320	mah3040	mah0503	mah0805	mah0805		mah2729
mah0503	mah2080	mah0372	mah0343	mah0194	mah0194		mah2782
mah0805	mah1347	mah0574	mah0805	mah3040	mah3040		mah2775
mah0194	mah0344	mah2727	mah0194	mah0372	mah0372		mah2763
mah3040	mah0503	mah0119	mah3040	mah1464	mah0574		mah2678
mah1464	mah0343	mah0120	mah0372	mah2196	mah0119		mah2635
mah1845	mah0805	mah0209	mah1464	mah0574	mah0120		mah2697
mah0119	mah0194	mah0148	mah2196	mah0119	mah1707		mah2702
mah0120	mah3040	mah1594	mah1845	mah0120	mah0273		mah2750
mah0273	mah0372	mah2817	mah0119	mah0209	mah0209
mah0209	mah1845	mah3009	mah0120	mah0148	mah0148
mah0148	mah0574	mah2856	mah0209	mah1594	mah1594
mah1594	mah2727	mah3010	mah0148	mah3027	mah2881
mah2856	mah0119	mah2881	mah1594	mah2927	mah2927
mah2881	mah0120	mah2794	mah2927	mah2906	mah2906
mah2794	mah0209	mah2860	mah2906	mah0439	mah0439
mah2860	mah0148	mah2950	mah0439	mah0219	mah1596
mah2950	mah1594	mah2927	mah0219	mah1596	mah2302
mah2927	mah2817	mah2906	mah1596	mah2302	mah1832
mah2906	mah2856	mah0439	mah2302	mah1832	mah2197
mah0439	mah2881	mah1596	mah1832	mah2197	mah0395
mah1596	mah2794	mah2302	mah0395	mah0395	mah0721
mah1832	mah2950	mah1832	mah0721	mah2236	mah2236
mah2197	mah2927	mah2197	mah2245	mah0056	mah0056
mah0395	mah2906	mah0395	mah2236	mah2368	mah2368
mah0721	mah0439	mah0721	mah0056	mah2370	mah2370
mah2245	mah1596	mah2245	mah2368	mah2373	mah2373
mah2236	mah2302	mah2236	mah2370	mah0803	mah0803
mah0056	mah1832	mah0056	mah0922	mah0948	mah0869
mah2316	mah2197	mah2316	mah0803	mah2261	mah2261
mah2368	mah0395	mah2368	mah0948	mah2376	mah2376
mah2370	mah2245	mah2370	mah2261	mah2382	mah2382
mah2373	mah2236	mah2373	mah2376	mah2385	mah2385
mah2379	mah0056	mah2379	mah2382	mah2307	mah2307
mah0922	mah2316	mah0803	mah2385	mah0712	mah0712
mah0803	mah2368	mah0948	mah2307	mah1509	mah1509
mah0869	mah2370	mah2261	mah0712	mah2377	mah2377
mah2261	mah2373	mah2376	mah1509	mah2432	mah2432
mah2376	mah2379	mah2382	mah2377	mah2433	mah2433
mah2382	mah0803	mah2385	mah2432	mah2366	mah2802
mah2385	mah2261	mah2307	mah2433	mah1318	mah1907
mah2307	mah2376	mah0712	mah2366	mah2816	mah2853
mah0712	mah2382	mah2905	mah1318	mah1330	mah2366
mah2905	mah2385	mah1315	mah2816	mah2920	mah1318
mah1315	mah2307	mah1509	mah1330	mah2933	mah2816
mah1509	mah1509	mah2377	mah2920	mah2844	mah1330
mah2377	mah2377	mah2432	mah2933	mah2138	mah2920
mah2432	mah2432	mah2433	mah2138	mah2777	mah2933
mah2433	mah2433	mah2802	mah2777	mah0123	mah2844
mah2332	mah2802	mah1907	mah0137	mah0137	mah2138
mah2331	mah1907	mah2853	mah2801	mah2801	mah2777
mah2853	mah2365	mah2365	mah0723	mah0723	mah2910
mah2365	mah2360	mah2360	mah2938	mah2486	mah2916
mah2360	mah2366	mah2366	mah2945	mah2938	mah2350
mah2366	mah1318	mah1318	mah2922	mah2945	mah0123
mah1318	mah2816	mah2816	mah2936	mah2922	mah0137
mah2816	mah1330	mah1330	mah2944	mah2936	mah2970
mah1330	mah2920	mah2920	mah2552	mah2944	mah2801
mah2920	mah2933	mah2933	mah2519	mah2552	mah0723
mah2933	mah2844	mah2844	mah2470	mah2519	mah2839
mah2844	mah2138	mah2138	mah2336	mah2470	mah2862
mah2777	mah2777	mah2777	mah0208	mah2336	mah2486
mah2910	mah2910	mah2818	mah2148	mah0208	mah2938
mah2916	mah2916	mah2910	mah2320	mah2320	mah2945
mah0137	mah0123	mah2916	mah2318	mah2318	mah2922
mah2393	mah0137	mah0123	mah2149	mah2149	mah2999
mah2801	mah2393	mah0137	mah2118	mah2118	mah2857
mah2909	mah2801	mah2393	mah2304	mah2304	mah2936
mah2908	mah0723	mah2970	mah0814	mah0814	mah2944
mah0723	mah2839	mah2801	mah2293	mah2293	mah2552
mah2839	mah2862	mah2909	mah0790	mah0790	mah3015
mah2862	mah2938	mah2908	mah2361	mah2361	mah2519
mah2938	mah2945	mah0723	mah2363	mah2363	mah2470
mah2945	mah2922	mah2839	mah2749	mah2749	mah0208
mah2922	mah2999	mah2862	mah1599	mah1599	mah2318
mah2999	mah2857	mah2999	mah0196	mah0196	mah2013
mah2857	mah2936	mah2857	mah2837	mah2751	mah2118
mah2936	mah2944	mah2936	mah2751	mah0569	mah2304
mah2944	mah3015	mah2944	mah0569	mah2729	mah0814
mah3015	mah0208	mah3015	mah0791	mah2759	mah2293
mah2470	mah2320	mah2470	mah2729	mah2753	mah0790
mah0208	mah2318	mah0208	mah2771	mah2771	mah2361
mah2320	mah2118	mah2320	mah2635	mah2757	mah2363
mah2318	mah2304	mah2318	mah2750	mah2635	mah2749
mah2118	mah0814	mah2118			mah1599
mah2304	mah0790	mah2304			mah2898
mah0814	mah2361	mah0814			mah2899
mah2293	mah2363	mah2054			mah0196
mah0790	mah2749	mah2293			mah2837
mah2361	mah1599	mah0790			mah1233
mah2363	mah2898	mah2361			mah0569
mah2749	mah2899	mah2363			mah2729
mah1599	mah0196	mah2749			mah2759
mah2898	mah2837	mah1599			mah2753
mah2899	mah1233	mah2898			mah2771
mah2845	mah2751	mah2899			mah2757
mah0196	mah0569	mah0196			mah2635
mah2837	mah2738	mah2837
mah1233	mah2737	mah2751
mah2751	mah2729	mah0569
mah0569	mah2759	mah2738
mah2738	mah2716	mah2737
mah2737	mah2771	mah2716
mah2782	mah2678	mah2678
mah2759	mah2757	mah2757
mah2716	mah2635	mah2635
mah2771	mah2697	mah2697
mah2775	mah2750	mah2750
mah2763
mah2678
mah2635
mah2697
mah2702
mah2750
