# Supplementary material for: Using transcriptomic and metabolomic data to investigate the molecular mechanisms that determine protein and oil contents during seed development in soybean
Source: Front Plant Sci. 2022 Sep 29;13:1012394. doi: 10.3389/fpls.2022.1012394 (PMC9557928; doi:10.3389/fpls.2022.1012394)
Supplement: Supplementary file 3 [file Table_3.xlsx]

## Sheet: table S3 
Table S3. Details regarding the RNA-seq data.
Sample	Raw Reads	Clean Reads	Clean Bases (G)	Error Rate (%)	Q20 (%)	Q30 (%)	GC Content (%)
NPS233-1-1	1562056	1558612	0.23	0.07	98.12	94.59	41.84
NPS233-1-2	2046322	2020788	0.3	0.07	98.2	94.77	41.78
NPS233-1-3	1010542	1004130	0.15	0.07	98.3	94.94	42.74
NPS233-2-1	1112190	1110693	0.17	0.07	98.2	94.63	41.42
NPS233-2-2	1196499	1193781	0.18	0.07	98.19	94.74	41.79
NPS233-2-3	1682654	1678992	0.25	0.07	98.05	94.46	41.72
NPS233-3-1	2040655	2038417	0.31	0.07	98.32	94.92	42.09
NPS233-3-2	3255854	3249213	0.49	0.07	98.19	94.62	42.61
NPS233-3-3	2246164	2242967	0.34	0.07	98.37	95.01	42.94
NPS233-4-1	1445079	1443395	0.22	0.07	98.25	94.76	42.62
NPS233-4-2	1522906	1520794	0.23	0.07	98.16	94.62	42.22
NPS233-4-3	501847	501234	0.08	0.07	98.38	95	43.16
NPS301-1-1	1156841	1144052	0.17	0.07	98.22	94.78	41.98
NPS301-1-2	2467090	2461103	0.37	0.07	98.18	94.66	42.37
NPS301-1-3	3985644	3976330	0.6	0.07	98.24	94.76	42.62
NPS301-2-1	2012511	2009865	0.3	0.07	98.28	94.84	42.61
NPS301-2-2	1979417	1975407	0.3	0.07	98.17	94.65	41.92
NPS301-2-3	2665209	2659431	0.4	0.07	98.22	94.72	42.59
NPS301-3-1	3768176	3759296	0.56	0.07	98.35	94.97	42.72
NPS301-3-2	2708836	2694309	0.4	0.07	98.19	94.7	42.45
NPS301-3-3	958152	956976	0.14	0.07	98.41	95.13	42.25
NPS301-4-1	1673041	1664624	0.25	0.07	98.13	94.66	42.4
NPS301-4-2	3278928	3275046	0.49	0.07	98.31	94.88	42.76
NPS301-4-3	865299	864244	0.13	0.07	98.45	95.21	42.19
