# Supplementary material for: Using transcriptomic and metabolomic data to investigate the molecular mechanisms that determine protein and oil contents during seed development in soybean
Source: Front Plant Sci. 2022 Sep 29;13:1012394. doi: 10.3389/fpls.2022.1012394 (PMC9557928; doi:10.3389/fpls.2022.1012394)
Supplement: Supplementary file 4 [file Table_4.xlsx]

## Sheet: Sheet1
Table S4. The mapping statistics of the RNA-Seq sequencing libraries.
Sample	Total Reads	Reads mapped	Unique mapped	Multi mapped
NPS233-1-1	1558612	1476277(94.72%)	1449482(93.00%)	32528(1.72%)
NPS233-1-2	2020788	1925754(95.30%)	1893350(93.69%)	40166(1.60%)
NPS233-1-3	1004130	961475(95.75%)	946887(94.30%)	17552(1.45%)
NPS233-2-1	1110693	1060055(95.44%)	1045325(94.11%)	19676(1.33%)
NPS233-2-2	1193781	1139811(95.48%)	1123747(94.13%)	20113(1.35%)
NPS233-2-3	1678992	1600055(95.30%)	1570269(93.52%)	35534(1.77%)
NPS233-3-1	2038417	1947476(95.54%)	1826056(89.58%)	131642(5.96%)
NPS233-3-2	3249213	3103635(95.52%)	3008109(92.58%)	107042(2.94%)
NPS233-3-3	2242967	2157490(96.19%)	2005734(89.42%)	161548(6.77%)
NPS233-4-1	1443395	1366692(94.69%)	1231896(85.35%)	146267(9.34%)
NPS233-4-2	1520794	1427462(93.86%)	1283303(84.38%)	162292(9.48%)
NPS233-4-3	501234	482886(96.34%)	436335(87.05%)	49956(9.29%)
NPS301-1-1	1144052	1093475(95.58%)	1074814(93.95%)	22311(1.63%)
NPS301-1-2	2461103	2348329(95.42%)	2310373(93.88%)	45896(1.54%)
NPS301-1-3	3976330	3812084(95.87%)	3743305(94.14%)	82881(1.73%)
NPS301-2-1	2009865	1936208(96.34%)	1897070(94.39%)	45465(1.95%)
NPS301-2-2	1975407	1888842(95.62%)	1857320(94.02%)	38763(1.60%)
NPS301-2-3	2659431	2558515(96.21%)	2480863(93.29%)	85978(2.92%)
NPS301-3-1	3759296	3624970(96.43%)	3445200(91.64%)	192290(4.78%)
NPS301-3-2	2694309	2560093(95.02%)	2388666(88.66%)	181971(6.36%)
NPS301-3-3	956976	921899(96.33%)	855393(89.39%)	72146(6.95%)
NPS301-4-1	1664624	1565343(94.04%)	1421693(85.41%)	154532(8.63%)
NPS301-4-2	3275046	3131673(95.62%)	2851445(87.07%)	299185(8.56%)
NPS301-4-3	864244	823472(95.28%)	748466(86.60%)	78718(8.68%)
