# Supplementary material for: Using transcriptomic and metabolomic data to investigate the molecular mechanisms that determine protein and oil contents during seed development in soybean
Source: Front Plant Sci. 2022 Sep 29;13:1012394. doi: 10.3389/fpls.2022.1012394 (PMC9557928; doi:10.3389/fpls.2022.1012394)
Supplement: Supplementary file 5 [file Table_5.xlsx]

## Sheet: Sheet1
Table S5. Annotation of expressed genes.
ID	NPS233-1-1_fpkm	NPS233-1-2_fpkm	NPS233-1-3_fpkm	NPS233-2-1_fpkm	NPS233-2-2_fpkm	NPS233-2-3_fpkm	NPS233-3-1_fpkm	NPS233-3-2_fpkm	NPS233-3-3_fpkm	NPS233-4-1_fpkm	NPS233-4-2_fpkm	NPS233-4-3_fpkm	NPS301-1-1_fpkm	NPS301-1-2_fpkm	NPS301-1-3_fpkm	NPS301-2-1_fpkm	NPS301-2-2_fpkm	NPS301-2-3_fpkm	NPS301-3-1_fpkm	NPS301-3-2_fpkm	NPS301-3-3_fpkm	NPS301-4-1_fpkm	NPS301-4-2_fpkm	NPS301-4-3_fpkm	NPS233-1-1_count	NPS233-1-2_count	NPS233-1-3_count	NPS233-2-1_count	NPS233-2-2_count	NPS233-2-3_count	NPS233-3-1_count	NPS233-3-2_count	NPS233-3-3_count	NPS233-4-1_count	NPS233-4-2_count	NPS233-4-3_count	NPS301-1-1_count	NPS301-1-2_count	NPS301-1-3_count	NPS301-2-1_count	NPS301-2-2_count	NPS301-2-3_count	NPS301-3-1_count	NPS301-3-2_count	NPS301-3-3_count	NPS301-4-1_count	NPS301-4-2_count	NPS301-4-3_count	chr
Glyma.01G000100.Wm82.a2.v1	10.22	8.6	4.66	18.58	7.96	7.55	11.21	18.67	6.57	4.72	3.41	6.66	16.51	3.85	9.48	7.84	6.38	7.14	9.35	11.65	6.86	4.09	6.63	1.94	10	11	3	13	6	8	14	38	9	4	3	2	12	6	24	10	8	12	22	19	4	4	13	1	Chr01
Glyma.01G000200.Wm82.a2.v1	0	0	0	0	0	0	0	0.67	0	0	0	0	0	0	0	1.08	0	0	0	0	0	0	0.35	0	0	0	0	0	0	0	0	2	0	0	0	0	0	0	0	2	0	0	0	0	0	0	1	0	Chr01
Glyma.01G000400.Wm82.a2.v1	6.86	5.94	1.82	5.01	4.65	4.13	3.51	4.02	3.84	1.38	4.98	0.97	5.62	4.68	6.34	4.81	3.72	3.99	3.72	5.19	3.51	1.79	1.19	1.14	23	26	4	12	12	15	15	28	18	4	15	1	14	25	55	21	16	23	30	29	7	6	8	2	Chr01
Glyma.01G000600.Wm82.a2.v1	1.9	3.45	6.49	1.99	1.23	3.07	1.86	2.28	2.2	1.37	1.06	1.55	6.07	2.83	4.77	4	5.37	2.48	2.07	2.13	1.19	1.19	1.66	0.9	8	19	18	6	4	14	10	20	13	5	4	2	19	19	52	22	29	18	21	15	3	5	14	2	Chr01
Glyma.01G000900.Wm82.a2.v1	2.26	5.4	3.86	4.34	4.03	3.39	1.33	4.47	3.23	1.3	2.2	0.92	7.21	5.13	4.8	4.11	3.3	4.1	4.46	2.88	1.89	1.69	2.39	0	8	25	9	11	11	13	6	33	16	4	7	1	19	29	44	19	15	25	38	17	4	6	17	0	Chr01
Glyma.01G001000.Wm82.a2.v1	16.57	20.29	22.18	21.32	21.52	16.53	19.22	20.4	16.58	6.89	15.49	10.8	33.91	20.37	17.42	24.91	18.1	19.67	18.74	20.69	17.81	15.24	13.89	16.39	25	40	22	23	25	27	37	64	35	9	21	5	38	49	68	49	35	51	68	52	16	23	42	13	Chr01
Glyma.01G001100.Wm82.a2.v1	0.97	3.46	0.49	2.71	1.68	1.79	1.77	2.17	2.07	1.49	2.15	2.1	3.04	3.64	1.99	1.73	2.52	2.25	2.41	2.32	0.54	1.29	1.93	1.23	3	14	1	6	4	6	7	14	9	4	6	2	7	18	16	7	10	12	18	12	1	4	12	2	Chr01
Glyma.01G001200.Wm82.a2.v1	0	0.2	0	0	0.67	0.71	0	0.37	0.18	0	0	0	0	0	0.2	0	0.4	0.3	0.21	0.31	0	0	0	0	0	1	0	0	2	3	0	3	1	0	0	0	0	0	2	0	2	2	2	2	0	0	0	0	Chr01
Glyma.01G001300.Wm82.a2.v1	21.91	13.94	8.98	16.52	15.02	15	10.42	20.59	11.61	7.11	6.3	6.42	19.22	23.62	20.65	17.18	15.55	19.05	13	11.97	9.92	6.15	9.21	6.55	89	74	24	48	47	66	54	174	66	25	23	8	58	153	217	91	81	133	127	81	24	25	75	14	Chr01
Glyma.01G001600.Wm82.a2.v1	1.43	0.78	1.56	1.15	1.6	2.08	1.28	1.08	1.76	0.47	0.23	0.67	1.1	1.03	0.95	1.89	3.2	1.79	1.11	1.23	2.41	0.61	0.51	0.78	7	5	5	4	6	11	8	11	12	2	1	1	4	8	12	12	20	15	13	10	7	3	5	2	Chr01
Glyma.01G001700.Wm82.a2.v1	4.43	3.69	5.51	8.44	6.79	10.77	4.41	6	4.6	4.18	1.79	2.62	4.87	5.3	6.22	8.64	9.1	7.26	3.35	3.86	8.11	1.61	4.02	2.3	11	12	9	15	13	29	14	31	16	9	4	2	9	21	40	28	29	31	20	16	12	4	20	3	Chr01
Glyma.01G001800.Wm82.a2.v1	0.3	0.23	0.46	0.85	0.79	1.69	0	1.17	0.65	0	0	0	1.23	0	0	2.34	1.19	0.53	0.76	0.18	1.02	0	0.46	1.16	1	1	1	2	2	6	0	8	3	0	0	0	3	0	0	10	5	3	6	1	2	0	3	2	Chr01
Glyma.01G001900.Wm82.a2.v1	0	0	0	0	0	0	0	0	0	0	0	0	0	0	0.09	0	0	0	0	0	0	0	0	0	0	0	0	0	0	0	0	0	0	0	0	0	0	0	1	0	0	0	0	0	0	0	0	0	Chr01
Glyma.01G002000.Wm82.a2.v1	14.45	6.76	10.99	3.37	9.38	0	0	2.32	0.57	0	0	0	2.16	5.54	12.72	3.08	3.76	0.47	0	0.48	0	0	0	0	18	11	9	3	9	0	0	6	1	0	0	0	2	11	41	5	6	1	0	1	0	0	0	0	Chr01
Glyma.01G002100.Wm82.a2.v1	12.32	7.83	6.86	2.67	4.28	5.77	3.26	4.42	4.46	1	3.09	2.83	10.04	11.32	13.35	5.59	3.93	4.64	4.91	3.75	4.95	1.73	2.08	3.63	71	59	26	11	19	36	24	53	36	5	16	5	43	104	199	42	29	46	68	36	17	10	24	11	Chr01
Glyma.01G002200.Wm82.a2.v1	16.25	9.95	18.12	9.59	7.5	8.67	4.53	5.56	6.45	7.09	3.21	0	15.56	11.78	15.63	6.92	5.92	7.56	6.01	5.42	5.46	6.5	5.59	8.24	45	36	33	19	16	26	16	32	25	17	8	0	32	52	112	25	21	36	40	25	9	18	31	12	Chr01
Glyma.01G002300.Wm82.a2.v1	0	0	0	0	0	0	0	0	0	0	0	0	0	0	0.15	0	0	0	0	0	0	0	0	0	0	0	0	0	0	0	0	0	0	0	0	0	0	0	1	0	0	0	0	0	0	0	0	0	Chr01
Glyma.01G002400.Wm82.a2.v1	38.33	45.22	15.78	11.16	10.37	30.23	28.79	21.5	33.1	23.07	25.76	36.42	48.37	59.08	54.02	55.12	34.26	37.64	42.5	29.23	41.56	24.75	31.48	19.74	48	74	13	10	10	41	46	56	58	25	29	14	45	118	175	90	55	81	128	61	31	31	79	13	Chr01
Glyma.01G002600.Wm82.a2.v1	16.54	12.66	22.36	19.53	24.82	19.69	8.64	19.27	6.57	4.25	2.04	7.19	8.91	15.22	15.35	17.2	18.35	19.25	10.85	8.38	6.17	1.84	4.22	2.8	45	45	40	38	52	58	30	109	25	10	5	6	18	66	108	61	64	90	71	38	10	5	23	4	Chr01
Glyma.01G002700.Wm82.a2.v1	8.18	5.21	8.29	8.57	7.08	5.03	6.41	6.55	1.95	2.36	3.03	2.22	11.01	9.83	11.85	6.27	8.5	10.7	6.52	4.91	0	4.09	2.72	1.3	12	10	8	9	8	8	12	20	4	3	4	1	12	23	45	12	16	27	23	12	0	6	8	1	Chr01
Glyma.01G003000.Wm82.a2.v1	6.36	4.87	3.52	0	0	0	0	0.28	0	0	0	0	3.11	6.53	7.38	0	0	0	0.24	0	0	0	0	0	11	11	4	0	0	0	0	1	0	0	0	0	4	18	33	0	0	0	1	0	0	0	0	0	Chr01
Glyma.01G003100.Wm82.a2.v1	0.69	0.53	1.05	1.92	2.68	2.54	0.54	2.32	0.98	1.59	0	0	3.71	0.43	3.99	3.17	3.22	3.2	4.01	3.3	2.31	0	0.34	0	1	1	1	2	3	4	1	7	2	2	0	0	4	1	15	6	6	8	14	8	2	0	1	0	Chr01
Glyma.01G003200.Wm82.a2.v1	0	0	0	0	0.36	0	0	0	0	0	0	0	0	0.52	0.11	0	0	0	0	0	0	0	0	0	0	0	0	0	1	0	0	0	0	0	0	0	0	3	1	0	0	0	0	0	0	0	0	0	Chr01
Glyma.01G003400.Wm82.a2.v1	5.75	4.09	1.87	1.72	2.13	0.76	0.64	1.38	0.59	0.47	0	1.34	3.32	1.55	1.43	2.2	1.92	1.91	1.02	2.46	0	0.41	0.2	0.78	14	13	3	3	4	2	2	7	2	1	0	1	6	6	9	7	6	8	6	10	0	1	1	1	Chr01
Glyma.01G003600.Wm82.a2.v1	4.48	2.64	0.52	7.23	4.92	5.1	4.32	4.48	3.7	1.59	1.15	1.12	2.32	2.81	1.6	3.97	4.84	4.82	4.3	4.55	2.9	2.41	1.38	3.28	13	10	1	15	11	16	16	27	15	4	3	1	5	13	12	15	18	24	30	22	5	7	8	5	Chr01
Glyma.01G003700.Wm82.a2.v1	13.52	12.83	11.51	25.7	39.32	34.46	33.06	32.76	27.44	21.25	23.46	22.9	12.38	16.28	10.66	26.96	34.59	27.38	20.46	23.37	37.23	24.33	28.88	16.46	25	31	14	34	56	69	78	126	71	34	39	13	17	48	51	65	82	87	91	72	41	45	107	16	Chr01
Glyma.01G003800.Wm82.a2.v1	16.45	14.2	11.54	10.61	15.33	13.63	5.95	8.72	6.93	2.44	4.22	1.37	11.92	12.17	14.02	13.59	17.44	13.5	8.42	7.85	10.62	6.75	4.84	2.41	39	44	18	18	28	35	18	43	23	5	9	1	21	46	86	42	53	55	48	31	15	16	23	3	Chr01
Glyma.01G004000.Wm82.a2.v1	0	0.71	0	0	0	0	0	0.45	3.32	0	0	0	0	0.58	1.44	0.71	0.73	0.54	0.39	0	0	0	0	1.77	0	1	0	0	0	0	0	1	5	0	0	0	0	1	4	1	1	1	1	0	0	0	0	1	Chr01
Glyma.01G004100.Wm82.a2.v1	2.27	0.87	0.58	3.71	0.74	0.35	0.89	1	0.54	0.66	0.42	1.24	0.26	0.95	1.61	1.74	0.89	0.44	1.1	0.8	0.95	0.38	1.32	2.16	12	6	2	14	3	2	6	11	4	3	2	2	1	8	22	12	6	4	14	7	3	2	14	6	Chr01
Glyma.01G004200.Wm82.a2.v1	0	0.77	0.76	31.56	4.56	1.39	2.75	3.38	2.15	2.9	3.91	0	0	0.94	0.97	1.92	1.17	3.5	0.63	2.11	0	4.01	1.75	1.91	0	2	1	45	7	3	7	14	6	5	7	0	0	3	5	5	3	12	3	7	0	8	7	2	Chr01
Glyma.01G004300.Wm82.a2.v1	389.83	515.35	354.16	460.51	593.39	638.08	523.92	537.9	589.27	349.13	349.07	482.6	408.02	392.94	367.66	673.48	663.63	614.7	512.19	489.49	705.28	357.6	483.43	404.04	400	691	239	338	469	709	686	1148	846	310	322	152	311	643	976	901	873	1084	1264	837	431	367	994	218	Chr01
Glyma.01G004500.Wm82.a2.v1	28.16	30.97	37.46	27.06	26.27	32.1	20.69	20.31	24.21	15.25	15.66	10.03	34.35	29.24	29.42	29.02	29.51	23.55	25.43	17.42	18.47	16.72	14.49	16.73	64	92	56	44	46	79	60	96	77	30	32	7	58	106	173	86	86	92	139	66	25	38	66	20	Chr01
Glyma.01G004600.Wm82.a2.v1	18.91	22.51	2.13	14.68	13.64	25.87	2.74	12.12	3.5	0	2.34	4.56	21.68	19.32	21.11	15.58	21.3	11.82	4.08	0.84	1.18	1.4	0.7	0	27	42	2	15	15	40	5	36	7	0	3	2	23	44	78	29	39	29	14	2	1	2	2	0	Chr01
Glyma.01G004700.Wm82.a2.v1	4.59	7.03	0	5.61	3.72	6.89	0.9	5.52	2.87	0	1.28	0	3.09	4.68	1.55	8.8	5.37	3.67	0.72	1.72	1.93	0.57	1.15	0	8	16	0	7	5	13	2	20	7	0	2	0	4	13	7	20	12	11	3	5	2	1	4	0	Chr01
Glyma.01G004800.Wm82.a2.v1	0.23	0	0.69	0	0	0	0	0.11	0	0	0	0	0	0	0.09	0	0	0	0	0	0	0	0.11	0.43	1	0	2	0	0	0	0	1	0	0	0	0	0	0	1	0	0	0	0	0	0	0	1	1	Chr01
Glyma.01G004900.Wm82.a2.v1	0	0	0	1.03	0	0	0.58	0	0	0.85	0	0	0	0	0.57	0	0	0	0.31	0	0	0	0	0	0	0	0	1	0	0	1	0	0	1	0	0	0	0	2	0	0	0	1	0	0	0	0	0	Chr01
Glyma.01G005000.Wm82.a2.v1	33.44	22.84	98.96	51.77	32.68	15.61	7.89	16.94	2.06	7.06	3.2	11.71	30.49	35.85	25.85	21.23	25.52	9.41	12.86	5.61	6.64	6.83	6.64	5.47	93	83	181	103	70	47	28	98	8	17	8	10	63	159	186	77	91	45	86	26	11	19	37	8	Chr01
Glyma.01G005100.Wm82.a2.v1	0	0	0	0	0	0	0	0	0	0	0	0	0	0	0.15	0	0	0	0	0	0	0	0	0	0	0	0	0	0	0	0	0	0	0	0	0	0	0	1	0	0	0	0	0	0	0	0	0	Chr01
Glyma.01G005200.Wm82.a2.v1	4.33	1.92	4.51	3.19	2.96	1.26	1.07	1.43	1.3	1.58	0.51	1.49	1.54	2.29	2.56	0.7	1.07	1.86	2.28	1.64	1.53	1.6	0.46	2.17	19	11	13	10	10	6	6	13	8	6	2	2	5	16	29	4	6	14	24	12	4	7	4	5	Chr01
Glyma.01G005300.Wm82.a2.v1	18.19	14.81	19.62	22.14	21.32	25.46	22.53	18.33	15.93	10.17	11.75	21.02	17.37	15.08	21.31	18	19.68	22.19	19.02	15.84	25.61	11.14	10.25	8.92	31	33	22	27	28	47	49	65	38	15	18	11	22	41	94	40	43	65	78	45	26	19	35	8	Chr01
Glyma.01G005400.Wm82.a2.v1	7.47	4.72	10.86	5.9	4.64	3.9	3.05	4.37	1.62	2.25	1.81	0	12.24	8.55	9.54	2.24	1.52	2.27	2.7	1.36	2.73	2.27	2.92	1.85	23	19	22	13	11	13	12	28	7	6	5	0	28	42	76	9	6	12	20	7	5	7	18	3	Chr01
Glyma.01G005500.Wm82.a2.v1	0.57	1.09	4.32	0.79	0.37	0	0.22	0.27	0.41	0.33	0.63	1.85	0.38	1.78	1.43	0.44	1.55	1.16	0.83	1.02	1.43	0.57	0.14	0	2	5	10	2	1	0	1	2	2	1	2	2	1	10	13	2	7	7	7	6	3	2	1	0	Chr01
Glyma.01G005600.Wm82.a2.v1	6.5	4.35	0	3.41	5.8	6.75	4.46	3.91	2.61	0.47	2.71	1.32	8.75	8.91	9.73	3.74	6.34	6.85	5.57	3.41	2.73	1.22	2.03	1.54	16	14	0	6	11	18	14	20	9	1	6	1	16	35	62	12	20	29	33	14	4	3	10	2	Chr01
Glyma.01G005800.Wm82.a2.v1	1.98	0.61	0	0.55	0.51	0	0	0.76	0	0	0	0	1.6	0.99	0.76	0.3	0.62	0.23	0.82	0	0	0	0	0	5	2	0	1	1	0	0	4	0	0	0	0	3	4	5	1	2	1	5	0	0	0	0	0	Chr01
Glyma.01G006000.Wm82.a2.v1	2.03	1.04	10.28	24.58	2.63	0.62	0	1.95	0.97	0.78	0.75	0	8.19	2.12	6.27	1.56	1.58	1.97	1.41	2.03	0	2.03	1.01	0	3	2	10	26	3	1	0	6	2	1	1	0	9	5	24	3	3	5	5	5	0	3	3	0	Chr01
Glyma.01G006100.Wm82.a2.v1	2.79	1.71	4.24	3.9	3.62	2.06	1.31	4.56	3.39	5.16	1.86	4.55	4.13	1.57	3.45	2.57	2.39	3.9	3.02	2.01	1.87	5.3	3.2	5.84	10	8	10	10	10	8	6	34	17	16	6	5	11	9	32	12	11	24	26	12	4	19	23	11	Chr01
Glyma.01G006200.Wm82.a2.v1	417.07	252.89	1050	697.76	686.42	625.06	382.2	604.83	446.3	579.41	504.48	445.49	411.12	341.54	547.94	492.93	554.64	637.85	515.49	489.6	512.78	574.21	617.57	481.09	183	145	303	219	232	297	214	552	274	220	199	60	134	239	622	282	312	481	544	358	134	252	543	111	Chr01
Glyma.01G006300.Wm82.a2.v1	1.15	1.32	0	0.8	0	0.53	0	1.1	0	0	0	0	0.77	0.36	0.22	1.76	0	0	0.24	0.34	0	0	0.57	0	2	3	0	1	0	1	0	4	0	0	0	0	1	1	1	4	0	0	1	1	0	0	2	0	Chr01
Glyma.01G006400.Wm82.a2.v1	7.47	6.08	6.04	10.45	10.31	6.9	6.04	7.52	6.17	3.51	3.9	1.52	6.6	6.44	4.42	8.24	7.28	8.97	6.41	5.88	5.1	1.4	3.15	2.66	32	34	17	32	34	32	33	67	37	13	15	2	21	44	49	46	40	66	66	42	13	6	27	6	Chr01
Glyma.01G006500.Wm82.a2.v1	2.01	1.28	3.82	2.58	0.22	1.55	2.1	1.93	1.32	1.36	2.42	0	0.45	0.84	1.68	1.29	1.31	2.93	1.6	3.12	1.97	2.35	1.42	0.32	12	10	15	11	1	10	16	24	11	7	13	0	2	8	26	10	10	30	23	31	7	14	17	1	Chr01
Glyma.01G006600.Wm82.a2.v1	0	0	0	0	0	0.28	0	0	0	0	0	0	0	0	0	0	0	0	0	0	0	0	0	0.29	0	0	0	0	0	2	0	0	0	0	0	0	0	0	0	0	0	0	0	0	0	0	0	1	Chr01
Glyma.01G006700.Wm82.a2.v1	0.26	0.4	7.11	6.9	5.39	5.04	4.07	7.99	4.64	2.1	3.47	2.54	0.35	1.14	1.3	4.38	3.44	7.1	5.29	8.1	6.54	2.08	3.89	2.47	1	2	18	19	16	21	20	64	25	7	12	3	1	7	13	22	17	47	49	52	15	8	30	5	Chr01
Glyma.01G006800.Wm82.a2.v1	1.75	0.67	0	1.84	0.57	2.42	5.49	3.16	4.07	1.52	0.97	1.43	1.18	0.27	2.03	6.04	3.75	2.29	4	4.46	1.47	1.75	2.84	0	4	2	0	3	1	6	16	15	13	3	2	1	2	1	12	18	11	9	22	17	2	4	13	0	Chr01
Glyma.01G006900.Wm82.a2.v1	34.97	25.25	34.45	40.62	44.76	45.03	30.49	37.41	43.3	26.18	23.56	22.46	33.81	31.81	27.41	51	49.94	40.98	47.3	39.31	42.18	28.56	29.99	33.72	71	67	46	59	70	99	79	158	123	46	43	14	51	103	144	135	130	143	231	133	51	58	122	36	Chr01
Glyma.01G007000.Wm82.a2.v1	3.85	4.71	2.93	6.46	4.5	2.49	1.51	7.22	0.83	1.78	0	0	2.59	2.17	1.49	1.18	1.5	3.81	1.44	2.08	1.94	0.77	0.58	1.46	10	16	5	12	9	7	5	39	3	4	0	0	5	9	10	4	5	17	9	9	3	2	3	2	Chr01
Glyma.01G007200.Wm82.a2.v1	8.95	6.6	7.77	6.7	7.05	10.33	6.76	10.14	8.91	14.4	11.02	5.2	7.31	7.21	7.9	11.76	9.97	12.83	15.94	15.34	8.58	14.05	10.68	16.4	28	27	16	15	17	35	27	66	39	39	31	5	17	36	64	48	40	69	120	80	16	44	67	27	Chr01
Glyma.01G007300.Wm82.a2.v1	0	0.77	0.51	1.87	2.18	2.48	1.31	0.81	1.2	0	0	1.09	0.9	0.84	0.26	1.03	2.61	0.78	0.56	0.8	0.56	0	0.5	0	0	3	1	4	5	8	5	5	5	0	0	1	2	4	2	4	10	4	4	4	1	0	3	0	Chr01
Glyma.01G007400.Wm82.a2.v1	1.26	0.81	2.88	0.88	0.27	0.78	0.17	0.3	0	0	0.23	0	1.42	1.06	0.73	0.65	0	0	0.61	0	0.35	0	0	0	6	5	9	3	1	4	1	3	0	0	1	0	5	8	9	4	0	0	7	0	1	0	0	0	Chr01
Glyma.01G007500.Wm82.a2.v1	0	0	0	0	0	0	0	0	0	0	0	0	0	0	0	0	0	0	0	0.12	0	0	0	0	0	0	0	0	0	0	0	0	0	0	0	0	0	0	0	0	0	0	0	1	0	0	0	0	Chr01
Glyma.01G007700.Wm82.a2.v1	7.87	8.26	5.32	9.37	10.98	7.81	5.03	7.57	5.21	2.36	2.92	0.95	7.46	6.4	4.85	9.17	10.01	8.48	7.15	6.65	6.85	1.75	3.64	2.22	27	37	12	23	29	29	22	54	25	7	9	1	19	35	43	41	44	50	59	38	14	6	25	4	Chr01
Glyma.01G007800.Wm82.a2.v1	5.75	5.73	0.38	6.29	10.05	6.69	0.59	3.6	0.71	0	0.56	0	1.35	3.92	1.83	6.9	7.01	5.52	0.93	0.15	0.42	0.25	0.12	0	23	30	1	18	31	29	3	30	4	0	2	0	4	25	19	36	36	38	9	1	1	1	1	0	Chr01
Glyma.01G007900.Wm82.a2.v1	0	0	0	0	0	0	0	0	0	0	0	0	0	0	0	0	0	0.21	0	0	0	0	0	0	0	0	0	0	0	0	0	0	0	0	0	0	0	0	0	0	0	1	0	0	0	0	0	0	Chr01
Glyma.01G008000.Wm82.a2.v1	18.79	19.91	8.79	25.6	30.03	36.04	40.78	28.73	43.05	25.61	34.3	26.69	13.62	18.13	16.76	34.74	37.96	31.96	32.86	28.05	42.07	22.64	37.03	14.66	39	54	12	38	48	81	108	124	125	46	64	17	21	60	90	94	101	114	164	97	52	47	154	16	Chr01
Glyma.01G008100.Wm82.a2.v1	1.96	0.37	1.49	0	0	0	1.15	0.24	0	0	0	0	0.66	0.92	0	0	0.38	0	0	0.29	0	0.49	0	0	4	1	2	0	0	0	3	1	0	0	0	0	1	3	0	0	1	0	0	1	0	1	0	0	Chr01
Glyma.01G008200.Wm82.a2.v1	0	0	0	0	0	0	0	0	0	0	0	0	0	0	0.14	0	0	0	0	0	0	0	0	0	0	0	0	0	0	0	0	0	0	0	0	0	0	0	2	0	0	0	0	0	0	0	0	0	Chr01
Glyma.01G008300.Wm82.a2.v1	0	0	0	0	2.41	1.71	0	1.34	0	0	0	0	0	0	0	0.71	2.17	1.62	0.77	0	0	0	0	0	0	0	0	0	2	2	0	3	0	0	0	0	0	0	0	1	3	3	2	0	0	0	0	0	Chr01
Glyma.01G008400.Wm82.a2.v1	4.82	4.79	9.52	8.75	5.63	4	4.15	6.48	5.16	2.78	1.61	6.28	3.89	4.83	6.14	4.43	4.51	6.16	6.81	3.47	0.81	4.33	2.16	2.75	10	13	13	13	9	9	11	28	15	5	3	4	6	16	33	12	12	22	34	12	1	9	9	3	Chr01
Glyma.01G008500.Wm82.a2.v1	177.62	135.01	337.94	83.33	61.83	40.11	15.26	34.99	10.7	6.92	5	13.66	177.82	139.17	182.35	30.55	60.75	28.93	11.58	8.99	10.06	5.39	10.46	8.54	593	589	742	199	159	145	65	243	50	20	15	14	441	741	1575	133	260	166	93	50	20	18	70	15	Chr01
Glyma.01G008600.Wm82.a2.v1	23.76	21.87	26.07	25.23	25.77	23.05	13.43	22.7	15.26	7.65	7.03	8.82	27.13	27.53	23.48	20.53	23.22	21.87	17.38	16.06	9.09	8.42	9.61	9.72	79	95	57	60	66	83	57	157	71	22	21	9	67	146	202	89	99	125	139	89	18	28	64	17	Chr01
Glyma.01G008700.Wm82.a2.v1	0.71	0.18	0	4.3	4.3	1.09	0.93	1.59	0.84	0.27	1.05	1.54	0.95	0.89	0.55	1.45	2.77	2.61	1.18	1.13	0	0.71	1.18	0.45	3	1	0	13	14	5	5	14	5	1	4	2	3	6	6	8	15	19	12	8	0	3	10	1	Chr01
Glyma.01G008800.Wm82.a2.v1	47.72	40.94	16.49	44.47	35.67	52.08	18.13	31.28	23.77	17.55	16.89	14.13	30.17	32.19	31.3	47.14	40.04	31.97	17.74	22.99	27.92	7.23	18.04	13.75	66	74	15	44	38	78	32	90	46	21	21	6	31	71	112	85	71	76	59	53	23	10	50	10	Chr01
Glyma.01G008900.Wm82.a2.v1	10.14	9.81	4.06	7.09	8.32	7.4	6.07	6.42	2.29	2.16	1.78	3.48	9.7	8.03	9.91	4.91	4.37	6.52	4.44	5.29	4.03	2.67	3.6	3.05	38	48	10	19	24	30	29	50	12	7	6	4	27	48	96	24	21	42	40	33	9	10	27	6	Chr01
Glyma.01G009000.Wm82.a2.v1	0	2.06	34.19	12.57	4.67	4.15	1.41	6.92	0	0	0	0	0	5.64	5.91	1.38	2.81	1.57	1.87	0	4.53	0.9	0	0	0	3	25	10	4	5	2	16	0	0	0	0	0	10	17	2	4	3	5	0	3	1	0	0	Chr01
Glyma.01G009200.Wm82.a2.v1	2.95	4.89	6.73	0	0.64	0	0	0.95	0	0	0	0	2.65	5.86	5.7	0	1.53	0.29	0.41	0.59	0	0	0.74	0	6	13	9	0	1	0	0	4	0	0	0	0	4	19	30	0	4	1	2	2	0	0	3	0	Chr01
Glyma.01G009300.Wm82.a2.v1	11.73	13.9	7.22	16.79	18.86	20.64	19.7	29.68	27.15	11.3	18.02	23.66	12.41	19.97	13.93	21.21	20.05	30.23	24.74	28.16	20.17	13.69	21.89	13.81	42	65	17	43	52	80	90	221	136	35	58	26	33	114	129	99	92	186	213	168	43	49	157	26	Chr01
Glyma.01G009400.Wm82.a2.v1	1.39	1.98	3.03	1.67	1.29	0.74	0.62	0.48	0.28	0.23	0	0	2.14	3.87	4.46	0.76	0.93	0.69	0.33	0.72	1	0.2	0.4	0.38	7	13	10	6	5	4	4	5	2	1	0	0	8	31	58	5	6	6	4	6	3	1	4	1	Chr01
Glyma.01G009500.Wm82.a2.v1	9.33	6.59	3.27	0	1.86	1.99	1.69	1.38	1.54	1.66	0	0	0.97	9	6.65	2.75	2.24	2.5	1.19	0	0	0	0	0	13	12	3	0	2	3	3	4	3	2	0	0	1	20	24	5	4	6	4	0	0	0	0	0	Chr01
Glyma.01G009600.Wm82.a2.v1	4.97	8.37	6.8	4.87	5.16	3.67	0	3.11	0.71	0.57	0	0	8.7	11.22	6.15	6.48	2.71	4.63	1.86	1.19	2.5	0	0.99	0.95	10	22	9	7	8	8	0	13	2	1	0	0	13	36	32	17	7	16	9	4	3	0	4	1	Chr01
Glyma.01G009700.Wm82.a2.v1	23.21	26.86	5.59	21.37	29.76	25.61	9.09	23	7.69	1.96	3.15	3.69	15.24	27.51	19.47	26.27	24.28	24.21	16.83	10.02	5.23	5.66	4.66	4.84	82	124	13	54	81	98	41	169	38	6	10	4	40	155	178	121	110	147	143	59	11	20	33	9	Chr01
Glyma.01G009800.Wm82.a2.v1	16.71	31.67	6.05	31.16	29.97	25.73	15.59	23.73	17.63	11.04	5.31	7.78	18.22	20.46	21.54	25.64	24.83	24.55	19.86	13.37	17.37	9.55	7.55	12.11	21	52	5	28	29	35	25	62	31	12	6	3	17	41	70	42	40	53	60	28	13	12	19	8	Chr01
Glyma.01G009900.Wm82.a2.v1	6.06	6.81	5.53	3.39	5.25	5.23	1.58	1.75	3.47	2.8	3.15	2.63	5.44	6.85	7.97	2.79	2.84	4.47	4.54	2.67	6.11	2.43	4.24	1.54	15	22	9	6	10	14	5	9	12	6	7	2	10	27	51	9	9	19	27	11	9	6	21	2	Chr01
Glyma.01G010000.Wm82.a2.v1	2.09	1.6	0.53	1.46	1.81	1.93	0.55	2.01	2.24	0.4	1.16	1.14	2.35	2.62	1.35	2.41	1.63	1.83	0.87	0.63	0	0.7	0.52	0	6	6	1	3	4	6	2	12	9	1	3	1	5	12	10	9	6	9	6	3	0	2	3	0	Chr01
Glyma.01G010100.Wm82.a2.v1	1.72	1.69	2.99	2.4	3.19	1.59	1.15	1.3	0.35	0	0.82	0.8	2.64	2	2.47	1.88	1.92	2.57	0.82	1.33	0.82	0.25	0.25	0.93	7	9	8	7	10	7	6	11	2	0	3	1	8	13	26	10	10	18	8	9	2	1	2	2	Chr01
Glyma.01G010200.Wm82.a2.v1	23.7	15.06	14.66	6.74	11.47	19.29	9.13	15.64	7.18	6.96	8.94	1.31	19.47	14.1	20.8	14.79	11.28	19.63	15.2	9.4	9.44	4.82	8.62	4.58	59	49	24	12	22	52	29	81	25	15	20	1	36	56	134	48	36	84	91	39	14	12	43	6	Chr01
Glyma.01G010300.Wm82.a2.v1	46.64	42.47	49.23	51.73	38.53	40.58	15.4	31.13	13.77	6.24	10.72	10.05	60.19	64.53	74.49	42.86	46.6	28.03	19.71	19.66	15.53	5.39	8.27	8.06	121	144	84	96	77	114	51	168	50	14	25	8	116	267	500	145	155	125	123	85	24	14	43	11	Chr01
Glyma.01G010400.Wm82.a2.v1	2.8	2.94	5.32	6.36	2.27	5.81	1.64	6.56	5.5	2.02	1.56	0	1.88	3.95	4.06	4.02	3.55	6.31	7.85	7.98	2.35	2.1	1.92	1.33	8	11	10	13	5	18	6	39	22	5	4	0	4	18	30	15	13	31	54	38	4	6	11	2	Chr01
Glyma.01G010500.Wm82.a2.v1	0	0.16	1.3	2.7	1.95	0.99	1.68	1.13	1.07	0.25	1.19	0	0.29	0.27	0.08	1.32	0.67	0.37	0.71	0.39	0.72	0.21	0.43	0	0	1	4	9	7	5	10	11	7	1	5	0	1	2	1	8	4	3	8	3	2	1	4	0	Chr01
Glyma.01G010600.Wm82.a2.v1	76.27	71.89	93.34	97.52	78.49	107.36	66.33	100.17	95.72	65.56	53.8	39.39	75.13	85.15	87.72	151.24	113.9	132.05	98.61	103.81	109.32	68.81	79.37	97.28	82	101	66	75	65	125	91	224	144	61	52	13	60	146	244	212	157	244	255	186	70	74	171	55	Chr01
Glyma.01G010800.Wm82.a2.v1	1.16	1.78	3.09	2.03	1.13	2.68	0.46	1.95	1.45	1.34	0.32	4.73	1.95	2.19	1.23	1.11	1.81	1.01	0.12	1.05	0.49	2.32	1.3	1.66	4	8	7	5	3	10	2	14	7	4	1	5	5	12	11	5	8	6	1	6	1	8	9	3	Chr01
Glyma.01G010900.Wm82.a2.v1	8.26	6.32	8.37	8.66	7.15	15.26	19.42	10.59	17.22	30.23	23.74	22.43	12.05	11.22	14.64	10.56	9.67	15.22	14.03	18.18	15.03	25.47	18.55	35.35	12	12	8	9	8	24	36	32	35	38	31	10	13	26	55	20	18	38	49	44	13	37	54	27	Chr01
Glyma.01G011000.Wm82.a2.v1	6.62	5.07	3.36	1.54	4.3	3.06	0.86	2.65	0.79	0	0	3.6	22.28	10.38	13.22	5.08	4.3	4.49	1.84	0	0	2.21	0.55	0	6	6	2	1	3	3	1	5	1	0	0	1	15	15	31	6	5	7	4	0	0	2	1	0	Chr01
Glyma.01G011100.Wm82.a2.v1	20.72	32.06	10.96	28.97	25.73	39.1	14.12	21.01	10.63	9.37	18.54	8.81	23.05	27.97	28.38	31.44	43.22	36.96	23.6	24.87	15.13	13.06	14.61	14.56	46	93	16	46	44	94	40	97	33	18	37	6	38	99	163	91	123	141	126	92	20	29	65	17	Chr01
Glyma.01G011200.Wm82.a2.v1	2.66	4.95	7.81	7.71	8.4	5.27	3.13	5.76	1.63	2.64	2.54	0.62	4.35	5.61	4.63	4.96	6.23	4.1	2.93	3.31	2.24	2.09	1.42	3.26	14	34	27	29	34	30	21	63	12	12	12	1	17	47	63	34	42	37	37	29	7	11	15	9	Chr01
Glyma.01G011300.Wm82.a2.v1	2.23	1.49	0	1.17	1.08	2.06	0.44	2.14	2.98	0.64	1.24	2.72	3.74	0.7	1.72	3.84	0.87	2.75	2.43	2.67	1.4	2.23	1.53	0.53	8	7	0	3	3	8	2	16	15	2	4	3	10	4	16	18	4	17	21	16	3	8	11	1	Chr01
Glyma.01G011400.Wm82.a2.v1	3.74	3.68	4.06	8.21	4.16	6.41	8.79	7.45	4.2	1.23	0.59	0	0	6.36	3.3	4.51	8.33	5.28	3.11	3.85	3.59	1.6	1.87	4.06	7	9	5	11	6	13	21	29	11	2	1	0	0	19	16	11	20	17	14	12	4	3	7	4	Chr01
Glyma.01G011500.Wm82.a2.v1	0	0	0	0	0	0	0	0	0	0.43	0	0	0	0	0	0	0	0	0	0	0	0	0	0	0	0	0	0	0	0	0	0	0	1	0	0	0	0	0	0	0	0	0	0	0	0	0	0	Chr01
Glyma.01G011700.Wm82.a2.v1	0.75	0	0	0	0	0.35	0	0	0	0	0	0	0	0.23	0.14	0.29	1.17	0.87	0.62	0	0	0	0	1.42	2	0	0	0	0	1	0	0	0	0	0	0	0	1	1	1	4	4	4	0	0	0	0	2	Chr01
Glyma.01G011900.Wm82.a2.v1	0.28	2.75	0	0	0	0	0	0	0	0	0	0	1.12	0.87	1.71	0	0	0	0.11	0	0	0	0	0	1	13	0	0	0	0	0	0	0	0	0	0	3	5	16	0	0	0	1	0	0	0	0	0	Chr01
Glyma.01G012000.Wm82.a2.v1	0.18	0.56	0	0	0	0	0	0.09	0	0	0	0	0	0.35	1	0	0	0	0	0	0	0	0	0	1	4	0	0	0	0	0	1	0	0	0	0	0	3	14	0	0	0	0	0	0	0	0	0	Chr01
Glyma.01G012100.Wm82.a2.v1	1.33	2.03	0	0	0	0	0	0	0	0	0	0	1.34	2.08	4.48	0	0	0	0	0	0	0	0	0	4	8	0	0	0	0	0	0	0	0	0	0	3	10	35	0	0	0	0	0	0	0	0	0	Chr01
Glyma.01G012400.Wm82.a2.v1	3.49	5.67	3.98	3.05	6.23	6.44	2.39	4.19	2.8	3.53	1.94	0	3.52	4.37	4.05	5.35	4.42	6.09	5.98	2.62	3.66	2.18	2.83	1.66	8	17	6	5	11	16	7	20	9	7	4	0	6	16	24	16	13	24	33	10	5	5	13	2	Chr01
Glyma.01G012500.Wm82.a2.v1	1.04	1.59	2.64	1.45	2.25	1.6	2.45	5	1.49	2	1.16	0	2.33	3.7	3.62	2.39	2.98	4.24	2.02	2.71	1.75	1.73	1.56	1.98	3	6	5	3	5	5	9	30	6	5	3	0	5	17	27	9	11	21	14	13	3	5	9	3	Chr01
Glyma.01G012700.Wm82.a2.v1	9.88	10.28	8.41	7.18	7.18	12.41	8.67	12.54	11.86	5.94	6.15	6.44	2.13	4.21	3.82	5.15	6.16	5.29	5.42	3.79	3.32	1.58	1.38	2.25	25	34	14	13	14	34	28	66	42	13	14	5	4	17	25	17	20	23	33	16	5	4	7	3	Chr01
Glyma.01G012800.Wm82.a2.v1	0	0	0	0	0.46	0	0	0	0	0	0	0	0	0	0	0	0	0	0	0	0	0	0	0	0	0	0	0	1	0	0	0	0	0	0	0	0	0	0	0	0	0	0	0	0	0	0	0	Chr01
Glyma.01G013100.Wm82.a2.v1	0	0	0	0	0	0	0	0	0	0	0	0	0	0	0	0	0	0	0.09	0.13	0	0	0	0	0	0	0	0	0	0	0	0	0	0	0	0	0	0	0	0	0	0	1	1	0	0	0	0	Chr01
Glyma.01G013300.Wm82.a2.v1	0	0	0	0	0.34	0	0	0.5	0	0	0	0	0	0	0	0	0.41	0	0.22	0.16	0.44	0	0.26	0	0	0	0	0	1	0	0	4	0	0	0	0	0	0	0	0	2	0	2	1	1	0	2	0	Chr01
Glyma.01G013500.Wm82.a2.v1	2.71	8.29	2.47	1.89	1.41	0.75	0.21	1.82	0	0	0	0	3.65	4.24	3.98	0.42	1.06	1.1	0.56	0	0	0	0	0	10	40	6	5	4	3	1	14	0	0	0	0	10	25	38	2	5	7	5	0	0	0	0	0	Chr01
Glyma.01G013600.Wm82.a2.v1	3.8	6.09	7.36	7.74	5.39	5.43	4.61	2.66	4.45	2.8	1.54	3.38	3.26	4.99	5.08	2.92	7.01	4.43	4.03	4.98	2.9	1.04	3.97	2.63	11	23	14	16	12	17	17	16	18	7	4	3	7	23	38	11	26	22	28	24	5	3	23	4	Chr01
Glyma.01G013800.Wm82.a2.v1	0.61	1.41	0.47	2.58	0.4	1.14	0.48	2.07	0.66	0.36	0.68	0	0	0.58	0.59	1.65	1.44	1.25	1.28	0.92	0.52	0.31	0.46	0	2	6	1	6	1	4	2	14	3	1	2	0	0	3	5	7	6	7	10	5	1	1	3	0	Chr01
Glyma.01G013900.Wm82.a2.v1	2.42	0.74	5.89	25.06	23.9	17.45	11.01	15.14	2.08	2.8	10.78	7.89	0.65	1.82	4.12	2.97	4.16	4.23	2.42	5.23	4.88	0	1.69	0.92	5	2	8	37	38	39	29	65	6	5	20	5	1	6	22	8	11	15	12	18	6	0	7	1	Chr01
Glyma.01G014000.Wm82.a2.v1	1.24	1.09	0	0.74	0.69	0.82	0.42	1.19	0.13	0.2	0.39	0	0.48	0.78	1.44	0	1.8	0.21	0.59	0	0	0.18	0.35	0	7	8	0	3	3	5	3	14	1	1	2	0	2	7	21	0	13	2	8	0	0	1	4	0	Chr01
Glyma.01G014100.Wm82.a2.v1	0	0.8	1.07	2.45	3.64	0.65	1.92	2.02	0.5	2.02	1.95	4.57	0.47	0.66	0.54	1.34	3.83	1.22	1.46	1.05	1.18	1.75	0.87	0.67	0	3	2	5	8	2	7	12	2	5	5	4	1	3	4	5	14	6	10	5	2	5	5	1	Chr01
Glyma.01G014200.Wm82.a2.v1	1.08	0.28	0.55	1.01	1.41	0.33	0.57	1.21	0	0.83	0	0	0.49	1.58	0.84	1.38	0.84	1.47	0.45	0.22	0	1.08	0.18	0	3	1	1	2	3	1	2	7	0	2	0	0	1	7	6	5	3	7	3	1	0	3	1	0	Chr01
Glyma.01G014400.Wm82.a2.v1	6.76	6.65	7.34	6.75	10.03	8.03	4.92	8.59	6.9	3.35	10.74	3.15	5.2	5.15	4.48	7.41	10.17	9.27	9.84	7.53	8.11	4.34	6.26	8.26	14	18	10	10	16	18	13	37	20	6	20	2	8	17	24	20	27	33	49	26	10	9	26	9	Chr01
Glyma.01G014500.Wm82.a2.v1	5.5	6.8	0.64	7.69	5.49	6.64	3.65	6.3	3.33	3.91	4.23	5.51	2.85	3.18	3.92	3.89	3.3	5.41	5.45	6.09	3.55	2.96	3.8	3.22	13	21	1	13	10	17	11	31	11	8	9	4	5	12	24	12	10	22	31	24	5	7	18	4	Chr01
Glyma.01G014600.Wm82.a2.v1	1.05	0.96	1.28	5.28	4.63	4.26	1.64	4.54	3.15	2.43	0.93	0	1.98	3.16	1.22	4.83	5.57	5.86	5.5	4.03	1.06	2.1	2.83	1.2	5	6	4	18	17	22	10	45	21	10	4	0	7	24	15	30	34	48	63	32	3	10	27	3	Chr01
Glyma.01G014700.Wm82.a2.v1	1.24	1.63	0.27	2.23	2.31	1.15	1.25	1.71	0.76	0.62	0.79	0.58	2.39	1.89	1.78	3.4	2.35	2.17	2.51	2.34	1.19	1.07	0.89	1.01	7	12	1	9	10	7	9	20	6	3	4	1	10	17	26	25	17	21	34	22	4	6	10	3	Chr01
Glyma.01G014800.Wm82.a2.v1	0.51	0	2.32	1.42	1.98	0.94	0	0.98	0.73	0.59	0	0	0	3.19	1.18	3.12	1.19	2.07	1.48	1.83	0.85	0.51	1.02	0	1	0	3	2	3	2	0	4	2	1	0	0	0	10	6	8	3	7	7	6	1	1	4	0	Chr01
Glyma.01G014900.Wm82.a2.v1	3.46	6.29	9.87	5.44	6.18	10.79	6.1	6.45	5.57	4	4.33	5.64	6.41	4.61	6.69	14.6	9.45	7.8	7.38	4.93	6.54	4.33	4.32	4.94	8	19	15	9	11	27	18	31	18	8	9	4	11	17	40	44	28	31	41	19	9	10	20	6	Chr01
Glyma.01G015000.Wm82.a2.v1	11.24	11.88	10.58	26.94	16.33	16.31	17.2	20.33	10.33	10.21	10.12	10.46	8.29	12.92	11.79	14.57	12.32	14.95	14.91	14.13	13.03	12.58	10.02	14.25	42	58	26	72	47	66	82	158	54	33	34	12	23	77	114	71	59	96	134	88	29	47	75	28	Chr01
Glyma.01G015100.Wm82.a2.v1	28.87	29.92	18.91	22.36	25.95	23.79	13.23	22.42	17.14	7.7	4.94	7.24	28.11	19.78	27.3	28.28	28.41	25.33	17.92	18.66	8.95	4	9.53	13.52	65	88	28	36	45	58	38	105	54	15	10	5	47	71	159	83	82	98	97	70	12	9	43	16	Chr01
Glyma.01G015300.Wm82.a2.v1	10.05	7.69	5.1	9.37	15.23	9.28	7.44	9.4	6.39	3.23	7.45	3.64	16.54	9.46	9.28	11.14	5.66	6.17	6.04	8.71	11.25	6.7	5.57	3.19	18	18	6	12	21	18	17	35	16	5	12	2	22	27	43	26	13	19	26	26	12	12	20	3	Chr01
Glyma.01G015400.Wm82.a2.v1	100.89	83.43	71.75	48.91	58.09	61.61	29.33	48.5	31.4	15.04	16.29	21.2	104.05	106.62	115.73	38.06	45.69	43.55	34.17	24.9	21.86	11.39	17.05	10.83	124	134	58	43	55	82	46	124	54	16	18	8	95	209	368	61	72	92	101	51	16	14	42	7	Chr01
Glyma.01G015500.Wm82.a2.v1	23.31	20.88	25.07	24.63	19.19	33.6	19.6	23.23	15.44	17.74	23.39	9.26	30.61	24.24	22.19	26.59	23.5	27.12	24.34	20.81	17.18	14.21	19.57	22.7	41	48	29	31	26	64	44	85	38	27	37	5	40	68	101	61	53	82	103	61	18	25	69	21	Chr01
Glyma.01G015600.Wm82.a2.v1	9.14	4.55	5.56	7.03	7.12	6.75	7.52	5.71	5.88	1.06	8.13	5.95	6.77	5.73	7.59	6.31	8.2	7.98	6.65	6.31	3.84	6.85	4.1	6.95	20	13	8	11	12	16	21	26	18	2	16	4	11	20	43	18	23	30	35	23	5	15	18	8	Chr01
Glyma.01G015700.Wm82.a2.v1	1.55	2.97	1.97	3.26	3.7	4.07	0.61	1.99	0.74	0.6	1.15	0.84	3.14	1.62	2.1	3.78	3.03	2.71	2.05	1.09	1.31	0.78	1.29	0.99	6	15	5	9	11	17	3	16	4	2	4	1	9	10	21	19	15	18	19	7	3	3	10	2	Chr01
Glyma.01G015900.Wm82.a2.v1	5.89	5.4	8.5	7.4	4.2	4.08	4.61	4.81	2.94	2.38	1.96	3.83	6.73	4.61	3.64	4.74	6.43	3.25	3.79	3.35	1.98	1.77	2.94	2.24	20	24	19	18	11	15	20	34	14	7	6	4	17	25	32	21	28	19	31	19	4	6	20	4	Chr01
Glyma.01G016100.Wm82.a2.v1	0	0	0	0	0	0	0	0	0	0	0	0	0	0	0	0	0	0	0.12	0	0	0	0.15	0	0	0	0	0	0	0	0	0	0	0	0	0	0	0	0	0	0	0	1	0	0	0	1	0	Chr01
Glyma.01G016200.Wm82.a2.v1	1.54	1.18	2.35	3.24	2.51	1.07	1.51	1.11	0.83	1.34	0.86	0	2.6	1.94	1.79	1.78	4.22	0.67	1.61	1.39	1.95	1.54	0.96	0	4	4	4	6	5	3	5	6	3	3	2	0	5	8	12	6	14	3	10	6	3	4	5	0	Chr01
Glyma.01G016400.Wm82.a2.v1	7.05	9.44	5.36	19.71	12.2	9.77	6.45	11.58	7.14	4.75	5.88	1.91	15.03	7	11.13	9.91	11.46	11.62	8.79	7.76	4.93	8.22	4.69	1.12	12	21	6	24	16	18	14	41	17	7	9	1	19	19	49	22	25	34	36	22	5	14	16	1	Chr01
Glyma.01G016500.Wm82.a2.v1	7.22	5.4	8.98	11.93	11.29	8.94	3.86	14.44	4.69	0.38	0.55	0	6.63	12.97	12.75	9.69	10.24	17.19	16.78	10.14	5.24	2.46	1.47	0.62	44	43	36	52	53	59	30	183	40	2	3	0	30	126	201	77	80	180	246	103	19	15	18	2	Chr01
Glyma.01G016600.Wm82.a2.v1	0	0.42	0	0	0	0	0	0	0	0	0	0	0	0	0	0	0	0	0	0	0	0	0	0	0	1	0	0	0	0	0	0	0	0	0	0	0	0	0	0	0	0	0	0	0	0	0	0	Chr01
Glyma.01G016800.Wm82.a2.v1	22.2	19.99	22.5	19.47	8.48	17.69	8.53	10.25	6.53	4.53	0.97	4.25	29.3	24.84	30.62	18.36	16.3	9.12	7.96	7.57	5.85	4.35	4.13	0	51	60	34	32	15	44	25	49	21	9	2	3	50	91	182	55	48	36	44	29	8	10	19	0	Chr01
Glyma.01G016900.Wm82.a2.v1	7.67	4.85	6.59	11.18	6.49	7.08	4.7	6.73	5.95	3.47	2.22	1.09	4.94	5.85	5.28	4.09	5.72	7.37	3.19	3.4	1.12	3	2.16	3.8	23	19	13	24	15	23	18	42	25	9	6	1	11	28	41	16	22	38	23	17	2	9	13	6	Chr01
Glyma.01G017000.Wm82.a2.v1	21.13	18.79	46.89	15.97	5.93	3.69	26.85	4.67	5.31	9.24	17.79	5.58	35.36	26.14	39.96	0.88	4.45	5.98	7.12	9.94	2.88	18.84	11.11	11.95	37	43	54	20	8	7	60	17	13	14	28	3	46	73	181	2	10	18	30	29	3	33	39	11	Chr01
Glyma.01G017100.Wm82.a2.v1	8.8	5.15	4.72	2.9	2.02	2.87	4.06	6.97	4.44	3.59	4.03	1.69	11.15	5.85	11.41	3.18	2.83	5.42	7.75	5.9	2.61	3.62	4.65	4.92	17	13	6	4	3	6	10	28	12	6	7	1	16	18	57	8	7	18	36	19	3	7	18	5	Chr01
Glyma.01G017300.Wm82.a2.v1	1.75	3.02	0	0	0	0.41	0	0.63	1.25	0	0	0	0	2.75	1.87	0.34	0	0.77	0.36	0	0	0.44	0	0	4	9	0	0	0	1	0	3	4	0	0	0	0	10	11	1	0	3	2	0	0	1	0	0	Chr01
Glyma.01G017400.Wm82.a2.v1	11.88	8.64	16.26	4.15	2.31	8.23	4.19	8	1.7	2.06	3.3	1.94	7.2	7.45	11.02	6.38	6.03	10.03	3.46	3.57	2.99	3.56	2.08	0	20	19	18	5	3	15	9	28	4	3	5	1	9	20	48	14	13	29	14	10	3	6	7	0	Chr01
Glyma.01G017700.Wm82.a2.v1	4.54	5.5	4.03	0.53	0	1.05	1.19	0.73	0.54	0.44	0.42	0	8.66	14	23.41	1.74	0.59	0.88	0.79	0	0.64	0.76	0.76	0	12	19	7	1	0	3	4	4	2	1	1	0	17	59	160	6	2	4	5	0	1	2	4	0	Chr01
Glyma.01G017800.Wm82.a2.v1	1.18	1.35	3.57	0.82	1.53	0.54	0.46	0.85	0	0	0	0	1.58	1.84	2.04	0.45	0	0.68	0.73	0.71	0	1.17	0	1.12	2	3	4	1	2	1	1	3	0	0	0	0	2	5	9	1	0	2	3	2	0	2	0	1	Chr01
Glyma.01G017900.Wm82.a2.v1	23.96	12.05	21.86	22.01	16	6.32	3.22	11.19	3.42	1.58	0.76	8.92	35.02	30.05	28.58	10.5	11.75	7.97	7.69	4.52	3.45	5.48	3.76	2.6	35	23	21	23	18	10	6	34	7	2	1	4	38	70	108	20	22	20	27	11	3	8	11	2	Chr01
Glyma.01G018000.Wm82.a2.v1	38.79	17.32	258.56	18.08	0	0	0	0.31	0.46	0.75	1.44	0	28.72	32.43	63.23	0	1.01	1.13	0.81	1.55	1.09	2.59	1.29	1.23	60	35	263	20	0	0	0	1	1	1	2	0	33	80	253	0	2	3	3	4	1	4	4	1	Chr01
Glyma.01G018100.Wm82.a2.v1	528.15	470.38	89.37	45.65	38.15	58.04	37.74	93.01	42.01	17.92	26.33	7.98	560.44	637.26	586.56	147.76	109.52	160.07	100.46	128.34	87.72	23.67	56.22	35.7	647	753	72	40	36	77	59	237	72	19	29	3	510	1245	1859	236	172	337	296	262	64	29	138	23	Chr01
Glyma.01G018300.Wm82.a2.v1	2.6	2.39	2.77	1.45	2.36	6.96	0.61	2.75	0.56	0	0	0	1.75	1.47	1.41	5.19	5.07	5.14	2.16	0.62	0.87	0.78	0.26	0	10	12	7	4	7	29	3	22	3	0	0	0	5	9	14	26	25	34	20	4	2	3	2	0	Chr01
Glyma.01G018600.Wm82.a2.v1	14.04	8.48	11.24	19.63	20.15	19.11	20.27	17.05	22.71	7.69	9.86	19.26	11.94	10.66	10.57	26.64	21.9	26.66	20.59	19.07	16.13	10.34	10.33	12.65	19	15	10	19	21	28	35	48	43	9	12	8	12	23	37	47	38	62	67	43	13	14	28	9	Chr01
Glyma.01G018700.Wm82.a2.v1	3.51	2.09	5.93	12	4.56	4.68	3.06	4.31	1.67	0.9	1.74	2.54	4.2	6.85	6.03	4.79	5.48	5.68	5.03	3.51	4.59	2.34	1.95	2.23	9	7	10	22	9	13	10	23	6	2	4	2	8	28	40	16	18	25	31	15	7	6	10	3	Chr01
Glyma.01G018800.Wm82.a2.v1	3.75	2.51	4.99	7.22	7.31	2.6	4.41	4.06	1.01	2.17	2.61	3.06	6.95	3.24	2.72	2.16	5.12	5.19	2.73	1.69	0.79	2.81	2.11	1.78	8	7	7	11	12	6	12	18	3	4	5	2	11	11	15	6	14	19	14	6	1	6	9	2	Chr01
Glyma.01G019000.Wm82.a2.v1	2.72	3.13	0.69	12.06	7.66	7.55	3.2	7.86	3.57	5.77	6.57	5.92	1.83	2.28	4.04	6.97	13.81	12.15	12.46	10.36	3.81	3.18	8.61	6.05	6	9	1	19	13	18	9	36	11	11	13	4	3	8	23	20	39	46	66	38	5	7	38	7	Chr01
Glyma.01G019100.Wm82.a2.v1	2.37	2.41	5.6	1.84	3.41	5.1	6.18	3.66	6.95	5.16	7.31	6.85	2.48	3.96	1.63	5.85	4.51	5.35	6.78	6.15	8.39	9.72	6.82	8	9	12	14	5	10	21	30	29	37	17	25	8	7	24	16	29	22	35	62	39	19	37	52	16	Chr01
Glyma.01G019200.Wm82.a2.v1	1.65	2.1	2.92	3.46	3.21	2.03	15.93	2.91	5.3	4.76	9.47	8.06	6.66	1.72	3.5	3.58	3.43	5.44	6.74	9.07	16.61	16.48	13.16	15.15	6	10	7	9	9	8	74	22	27	15	31	9	18	10	33	17	16	34	59	55	36	60	96	29	Chr01
Glyma.01G019300.Wm82.a2.v1	4.09	2.3	1.24	3.05	2.13	2.52	0.86	1.44	0.39	0	0.61	0	4.04	4.11	6.12	1.47	1.92	2.22	2.16	1.15	0.46	0.82	0.95	0	15	11	3	8	6	10	4	11	2	0	2	0	11	24	58	7	9	14	19	7	1	3	7	0	Chr01
Glyma.01G019400.Wm82.a2.v1	22.71	33.55	16.46	30.64	31.54	31.21	5.38	21.58	6.23	2.75	4.99	4.3	28.44	28.81	20.41	19.04	21.01	17.52	8.89	5.23	5.76	2.9	4.22	3.52	86	166	41	83	92	128	26	170	33	9	17	5	80	174	200	94	102	114	81	33	13	11	32	7	Chr01
Glyma.01G019500.Wm82.a2.v1	3.67	11.25	6.98	11.56	7.15	15.27	5.76	10.16	4.6	3.18	3.06	0	23.49	17.85	28.76	5.64	13.61	8.02	5.73	3.31	0	8.26	5.04	3.49	4	16	5	9	6	18	8	23	7	3	3	0	19	31	81	8	19	15	15	6	0	9	11	2	Chr01
Glyma.01G019600.Wm82.a2.v1	2.19	1.12	0.56	1.02	1.9	0.67	0.57	1.76	0.52	0	0.41	0	0	1.83	0.42	1.12	2.85	1.28	1.06	1.1	1.23	0	0.55	0.7	6	4	1	2	4	2	2	10	2	0	1	0	0	8	3	4	10	6	7	5	2	0	3	1	Chr01
Glyma.01G019700.Wm82.a2.v1	93.38	137.71	40.66	88.71	105.33	67.39	51.86	46.85	29.48	14.14	30.76	36.92	126.31	121.08	90.93	79.96	97.23	68.05	41.27	29.38	40.34	15.86	25.79	16.38	206	397	59	140	179	161	146	215	91	27	61	25	207	426	519	230	275	258	219	108	53	35	114	19	Chr01
Glyma.01G019800.Wm82.a2.v1	17.24	13.55	15.08	10.23	7.97	16.14	5.74	11.81	3.54	6.28	9.46	8.46	8.26	12.73	11.13	19.2	16.76	23.91	13.25	11.62	4.36	3.3	10.72	4.49	73	75	42	31	26	74	31	104	21	23	36	11	26	86	122	106	91	174	135	82	11	14	91	10	Chr01
Glyma.01G019900.Wm82.a2.v1	1.15	3.24	3.51	3.23	2.5	2.84	2.71	2.22	1.38	0	3.42	0	1.55	0.97	2.38	1.48	2.4	3.13	3.04	3	1.29	1.54	1.34	1.46	3	11	6	6	5	8	9	12	5	0	8	0	3	4	16	5	8	14	19	13	2	4	7	2	Chr01
Glyma.01G020100.Wm82.a2.v1	0.79	0.3	0	0	1.53	0.18	0.31	0.47	0.14	0.23	0	0	0.27	0.37	0.61	0.6	0.15	0.34	0.25	0.12	0	0.2	0.1	0	4	2	0	0	6	1	2	5	1	1	0	0	1	3	8	4	1	3	3	1	0	1	1	0	Chr01
Glyma.01G020200.Wm82.a2.v1	21.67	28.02	29.54	24.03	14.55	15.18	6.44	15.81	5.88	7.77	5.82	9.74	19.11	29.99	31.2	16.05	13.41	14.35	9.94	7.18	6.27	5.23	8.2	2.84	29	49	26	23	15	22	11	44	11	9	7	4	19	64	108	28	23	33	32	16	5	7	22	2	Chr01
Glyma.01G020300.Wm82.a2.v1	14.81	11.67	9.74	6.49	8.89	11.02	8.14	10.52	6.79	4.34	5.65	4.32	14.58	12.19	12.64	10.68	8.96	10.29	9	5.97	7.42	5.74	3.75	6.3	67	69	29	21	31	54	47	99	43	17	23	6	49	88	148	63	52	80	98	45	20	26	34	15	Chr01
Glyma.01G020400.Wm82.a2.v1	1.84	4.23	0	0	1.2	2.55	0	0.89	0.66	0	1.02	0	1.24	4.04	5.69	1.41	2.87	4.29	1.53	0	0	1.84	0	0	2	6	0	0	1	3	0	2	1	0	1	0	1	7	16	2	4	8	4	0	0	2	0	0	Chr01
Glyma.01G020500.Wm82.a2.v1	0	0	0.6	0	0	0	0	0	0	0	0	0	0	0	0.15	0	0	0	0	0	0	0	0.2	0	0	0	1	0	0	0	0	0	0	0	0	0	0	0	1	0	0	0	0	0	0	0	1	0	Chr01
Glyma.01G020800.Wm82.a2.v1	0	0	0	0	0	0	0	0	0	0	0	0	0	0	0.11	0	0	0	0	0	0	0	0	0	0	0	0	0	0	0	0	0	0	0	0	0	0	0	1	0	0	0	0	0	0	0	0	0	Chr01
Glyma.01G020900.Wm82.a2.v1	0	1.11	0	0.67	2.5	8.46	15.11	6.72	6.2	8.91	15.02	3.14	0	0	0	11.83	4.51	15.43	13.43	12.15	17	6.75	15.88	9.17	0	3	0	1	4	19	40	29	18	16	28	2	0	0	0	32	12	55	67	42	21	14	66	10	Chr01
Glyma.01G021000.Wm82.a2.v1	31.56	63.03	16.5	1.38	1.28	6.38	0.39	3.79	2.47	0.57	1.65	0	8.63	5.57	4.58	0	0	0	0	0	0	0	0	0	64	167	22	2	2	14	1	16	7	1	3	0	13	18	24	0	0	0	0	0	0	0	0	0	Chr01
Glyma.01G021100.Wm82.a2.v1	1.29	0.99	0.66	0	0	1.59	0	1.04	0	0	0	0	0.58	1.62	1.17	0.66	1.01	0.5	0.36	0.52	0.72	0	0.43	0	3	3	1	0	0	4	0	5	0	0	0	0	1	6	7	2	3	2	2	2	1	0	2	0	Chr01
Glyma.01G021200.Wm82.a2.v1	2.06	0.79	0.31	2.59	3.74	3.8	0.97	1.19	0.44	0	0.92	0	0.55	1.55	0.48	1.89	1.77	1.08	0.68	0.49	0	0	0.1	0.39	10	5	1	9	14	20	6	12	3	0	4	0	2	12	6	12	11	9	8	4	0	0	1	1	Chr01
Glyma.01G021300.Wm82.a2.v1	4.93	4.11	1.36	5.01	8.72	10.75	6.67	7.96	6.4	8.8	5.48	7.29	1.81	4.77	6.23	5.49	8.38	6.51	8.38	8.33	1.5	2.69	4.25	11.07	11	12	2	8	15	26	19	37	20	17	11	5	3	17	36	16	24	25	45	31	2	6	19	13	Chr01
Glyma.01G021400.Wm82.a2.v1	9.15	9.26	8.98	8.67	9.2	11.18	8.79	10.64	8.02	5.46	4.27	3.85	9.14	12.22	10.04	13.36	10.82	8.76	9.7	6.73	5.95	5.02	5.3	2.81	31	41	20	21	24	41	38	75	38	16	13	4	23	66	88	59	47	51	79	38	12	17	36	5	Chr01
Glyma.01G021500.Wm82.a2.v1	0	0	0	0	0	0	0	0	0.7	0	0	0	2.62	0	0	0	0	0	0	0	0	0	0	0	0	0	0	0	0	0	0	0	1	0	0	0	2	0	0	0	0	0	0	0	0	0	0	0	Chr01
Glyma.01G021600.Wm82.a2.v1	6.93	11.05	21.07	20.99	21.36	16.53	15.61	17.35	14.65	14.35	11.24	16.93	7.38	7.06	11.16	12.84	10.13	12.93	7.44	8.49	8.73	5.48	7.92	7.69	24	50	48	52	57	62	69	125	71	43	35	18	19	39	100	58	45	77	62	49	18	19	55	14	Chr01
Glyma.01G021700.Wm82.a2.v1	0.4	0	0	0	0	0.37	0	0.39	0	0	0	0	0	0	0.47	0	0	0	0	0	0	0	0	0	1	0	0	0	0	1	0	2	0	0	0	0	0	0	3	0	0	0	0	0	0	0	0	0	Chr01
Glyma.01G022100.Wm82.a2.v1	152.92	268.05	67.55	283.06	402.6	324.24	97.07	230.42	116.62	61.21	55.12	130.81	244.96	238.92	203.75	490.78	539.76	296.26	146.35	147.64	131.97	60.64	81.43	81.23	179	410	52	237	363	411	145	561	191	62	58	47	213	446	617	749	810	596	412	288	92	71	191	50	Chr01
Glyma.01G022300.Wm82.a2.v1	0	0	0	2.12	0.49	1.4	0.3	1.82	0.27	1.31	0.42	2.46	0	0.71	0.29	0	0	0	0	0	0	0	0	0	0	0	0	4	1	4	1	10	1	3	1	2	0	3	2	0	0	0	0	0	0	0	0	0	Chr01
Glyma.01G022400.Wm82.a2.v1	0.34	1.54	0	2.35	0.44	0.31	0.53	1.29	0.48	0.39	0.75	0	0.45	0.84	1.04	2.06	0.79	1.17	1.82	1.41	5.08	1.01	1.68	0.64	1	6	0	5	1	1	2	8	2	1	2	0	1	4	8	8	3	6	13	7	9	3	10	1	Chr01
Glyma.01G022500.Wm82.a2.v1	0	0.78	0.52	7.59	7.93	6.58	3.72	10.11	5.09	0.78	3.4	6.63	0.91	0.85	0.39	7.29	10.85	12.04	8.6	6.51	3.99	4.07	4.4	5.81	0	3	1	16	18	21	14	62	21	2	9	6	2	4	3	28	41	61	61	32	7	12	26	9	Chr01
Glyma.01G022600.Wm82.a2.v1	0.78	1.4	3.97	0	0.34	1.21	0.2	0.88	0.56	1.51	1.16	0	2.81	0.66	1.92	0.2	0.81	1.22	0.43	1.1	0.88	1.04	0.52	0.99	3	7	10	0	1	5	1	7	3	5	4	0	8	4	19	1	4	8	4	7	2	4	4	2	Chr01
Glyma.01G022700.Wm82.a2.v1	5.58	3.9	7.01	8.81	10.39	3.14	2.85	4.31	3.12	1.68	1.08	0	3.59	6.84	5.53	2.79	1.89	2.96	2.32	2.62	0	0.73	1.21	1.84	23	21	19	26	33	14	15	37	18	6	4	0	11	45	59	15	10	21	23	18	0	3	10	4	Chr01
Glyma.01G022800.Wm82.a2.v1	6.07	3.32	2.64	13.74	14.63	8.01	4.98	10.42	4.54	1.34	1.61	2.82	1.95	3.08	2.57	4.66	5.64	4.37	2.76	3.64	1.46	2.02	1.15	1.1	21	15	6	34	39	30	22	75	22	4	5	3	5	17	23	21	25	26	23	21	3	7	8	2	Chr01
Glyma.01G022900.Wm82.a2.v1	0.63	0.32	0.32	0.88	0.27	0.19	0	0.1	0	0	0	0	0.28	0.53	0.16	0	0.33	0.12	0	0	0	0	0	0	3	2	1	3	1	1	0	1	0	0	0	0	1	4	2	0	2	1	0	0	0	0	0	0	Chr01
Glyma.01G023000.Wm82.a2.v1	9.72	12.68	2.61	3.2	2.97	5.28	0.9	3.85	4.08	0	1.27	1.86	13.08	10.39	10.82	3.51	6.69	2.99	2.85	2.4	0.96	1.71	1.43	1.09	17	29	3	4	4	10	2	14	10	0	2	1	17	29	49	8	15	9	12	7	1	3	5	1	Chr01
Glyma.01G023100.Wm82.a2.v1	0	0	0	0	0	0	0	0	0	0	0	0	0	0.18	0	0	0	0	0	0	0	0	0	0	0	0	0	0	0	0	0	0	0	0	0	0	0	1	0	0	0	0	0	0	0	0	0	0	Chr01
Glyma.01G023200.Wm82.a2.v1	3.06	1.17	1.55	4.99	3.31	4.71	1.4	5.03	2.55	1.77	1.99	1.66	0.34	2.72	1.77	2.74	3.58	2.97	2.33	1.99	2.57	0.77	1.91	0.97	12	6	4	14	10	20	7	41	14	6	7	2	1	17	18	14	18	20	22	13	6	3	15	2	Chr01
Glyma.01G023300.Wm82.a2.v1	41	29.02	14.81	18.99	15.97	17.04	14.86	19.96	6.23	7.4	10.55	10.02	32.08	52.86	50.31	15.53	18.99	19.38	10.97	11.84	8.6	4.87	6.27	7.31	160	148	38	53	48	72	74	162	34	25	37	12	93	329	508	79	95	130	103	77	20	19	49	15	Chr01
Glyma.01G023400.Wm82.a2.v1	0	0	0	0	0	0	0	0	0	0	0	0	0	0	0.47	0	0	0	0	0	0	0	0	0	0	0	0	0	0	0	0	0	0	0	0	0	0	0	1	0	0	0	0	0	0	0	0	0	Chr01
Glyma.01G023500.Wm82.a2.v1	0	0	0	0	0	0	0	0.48	0	0	0	0	0	0	0.19	0	1.18	0.59	0.63	0	0	0	0.25	0	0	0	0	0	0	0	0	2	0	0	0	0	0	0	1	0	3	2	3	0	0	0	1	0	Chr01
Glyma.01G023600.Wm82.a2.v1	2.81	3.22	4.27	2.21	4.1	2.43	5.36	3.79	3.01	1.42	2.54	2.29	4.25	3.52	2.37	4.57	3.42	2.14	3.57	1.89	5.59	2.28	2.89	2	16	24	16	9	18	15	39	45	24	7	13	4	18	32	35	34	25	21	49	18	19	13	33	6	Chr01
Glyma.01G023700.Wm82.a2.v1	1.12	1.54	0.68	2.19	0.29	1.24	0.53	1.4	0.96	0.26	0.5	2.92	1.21	1.69	1.82	2.4	0.87	1.43	1.4	1.21	0.75	0	0.34	0.43	5	9	2	7	1	6	3	13	6	1	2	4	4	12	21	14	5	11	15	9	2	0	3	1	Chr01
Glyma.01G023900.Wm82.a2.v1	0.83	0.79	1.58	4.06	4.58	1.53	1.63	3.49	2.82	1.68	2.31	0	1.12	1.04	1.36	2.55	3.24	2.78	2.59	2.24	2.79	4.77	1.86	2.37	4	5	5	14	17	8	10	35	19	7	10	0	4	8	17	16	20	23	30	18	8	23	18	6	Chr01
Glyma.01G024000.Wm82.a2.v1	32.29	47.84	67.79	40.12	48.57	37.39	26.91	29.32	16.12	12.44	10.83	13.36	88.99	49.81	52.1	51.88	41.57	25.64	29.62	24.29	30.98	8.2	14.07	12.67	63	122	87	56	73	79	67	119	44	21	19	8	129	155	263	132	104	86	139	79	36	16	55	13	Chr01
Glyma.01G024200.Wm82.a2.v1	0	0	0	0	0	0	0	0.69	0	0	0	0	0	0	0	0	0	0	0	0	0	0	0	0	0	0	0	0	0	0	0	1	0	0	0	0	0	0	0	0	0	0	0	0	0	0	0	0	Chr01
Glyma.01G024300.Wm82.a2.v1	5.41	6.44	2.74	0	0.78	0	0	0.58	0	0	0	0	3.24	3.77	4.88	0	0	0	0	0.36	0	0	0	0	9	14	3	0	1	0	0	2	0	0	0	0	4	10	21	0	0	0	0	1	0	0	0	0	Chr01
Glyma.01G024400.Wm82.a2.v1	0	0	0	0	1.14	0	0	0.84	0	1.01	0	0	0	0	0.68	0.67	0	0	0	0	0	0	0.44	0	0	0	0	0	1	0	0	2	0	1	0	0	0	0	2	1	0	0	0	0	0	0	1	0	Chr01
Glyma.01G024500.Wm82.a2.v1	0	0	0	0	0	0	0.33	0.4	0	0	0	0	0	0.53	0.98	0	0.33	0.24	0	0	0	0.42	0	0	0	0	0	0	0	0	1	2	0	0	0	0	0	2	6	0	1	1	0	0	0	1	0	0	Chr01
Glyma.01G024600.Wm82.a2.v1	32.46	24.84	40.21	32.77	34.33	29.97	29.67	29.47	42.53	25.7	9.36	15.66	20.23	15.83	14.64	46.1	38.91	34.27	31.49	28.13	37.34	18.63	12	17.14	54	54	44	39	44	54	63	102	99	37	14	8	25	42	63	100	83	98	126	78	37	31	40	15	Chr01
Glyma.01G024700.Wm82.a2.v1	4.2	5.46	2.55	1.17	7.63	6.2	3.62	4.64	2.1	0.48	2.33	0	0.56	6.31	4.22	4.83	6.22	5.37	3.14	2.27	3.52	2.94	1.47	0	10	17	4	2	14	16	11	23	7	1	5	0	1	24	26	15	19	22	18	9	5	7	7	0	Chr01
Glyma.01G024800.Wm82.a2.v1	0	0	0	0.5	0	0.33	0	0.17	0	0.41	0	0	0	0.22	0	0.27	1.11	0.21	0.15	0	0	0	0	0	0	0	0	1	0	1	0	1	0	1	0	0	0	1	0	1	4	1	1	0	0	0	0	0	Chr01
Glyma.01G025000.Wm82.a2.v1	0	1.15	0.57	5.77	5.36	5.89	12.05	6.13	8.04	7.37	7.51	11	1.52	0.47	0	9.5	12.58	8.51	11.7	7.65	10.71	8.63	6.37	6.42	0	4	1	11	11	17	41	34	30	17	18	9	3	2	0	33	43	39	75	34	17	23	34	9	Chr01
Glyma.01G025100.Wm82.a2.v1	181.57	152.79	30.18	23.67	20.46	44.75	43.92	29.75	26.29	6.75	16.88	5.71	178.4	205.73	256.58	25.97	35.06	42.12	30.34	26.27	14.7	8.17	11.07	1.11	311	342	34	29	27	83	96	106	63	10	26	3	227	562	1137	58	77	124	125	75	15	14	38	1	Chr01
Glyma.01G025200.Wm82.a2.v1	0.76	2.6	1.15	0	0.49	5.59	0.59	2	0.54	0	0	0	0	0.71	0.44	7.83	6.19	5.28	2.36	1.36	1.27	0	0	0	2	9	2	0	1	16	2	11	2	0	0	0	0	3	3	27	21	24	15	6	2	0	0	0	Chr01
Glyma.01G025400.Wm82.a2.v1	0.51	0	0	0.71	0	0	0	0.25	0	0	0	0	0	0	0	0	0	0	1.06	0	0.86	1.02	0	0	1	0	0	1	0	0	0	1	0	0	0	0	0	0	0	0	0	0	5	0	1	2	0	0	Chr01
Glyma.01G025500.Wm82.a2.v1	10.81	8.67	1.57	19.44	19.39	18.07	12.51	15.35	9.94	2.38	2.29	1.68	9.01	17.76	13.14	13.82	31.33	19.18	11.35	6.49	6.05	1.03	9.77	3.92	21	22	2	27	29	38	31	62	27	4	4	1	13	55	66	35	78	64	53	21	7	2	38	4	Chr01
Glyma.01G025600.Wm82.a2.v1	5.2	6.12	7.91	12.31	9.87	9.24	7.53	7.89	4.29	1.85	5.79	0	4.31	5.02	4.64	4.3	11.24	6.05	6.49	5.52	7.39	4	2.6	1.52	13	20	13	22	19	25	24	41	15	4	13	0	8	20	30	14	36	26	39	23	11	10	13	2	Chr01
Glyma.01G025800.Wm82.a2.v1	6.46	7	9	20.31	16.76	12.92	3.37	9.57	3.85	1.87	3.59	3.51	3.62	8.1	5.41	9.49	8.81	6.57	8.28	3.55	3.61	1.08	3.49	2.05	12	17	11	27	24	26	8	37	10	3	6	2	5	24	26	23	21	21	37	11	4	2	13	2	Chr01
Glyma.01G026000.Wm82.a2.v1	1.46	2.39	3.8	5.54	3.52	2.7	3.27	2.91	2.38	1.69	1.39	2.04	2.81	1.31	2.18	2.24	2.28	2.18	2.51	3	2.1	1.88	1.66	1.98	7	15	12	19	13	14	20	29	16	7	6	3	10	10	27	14	14	18	29	24	6	9	16	5	Chr01
Glyma.01G026100.Wm82.a2.v1	104.77	112.58	65.72	120.23	144.52	184.64	156.69	129.29	130.42	132.68	130.14	86.76	99.32	90.06	81.5	114.18	131.44	136.15	110.54	98.24	142.2	63.72	95.86	83.02	240	337	99	197	255	458	458	616	418	263	268	61	169	329	483	341	386	536	609	375	194	146	440	100	Chr01
Glyma.01G026200.Wm82.a2.v1	2.62	2.86	0.57	0	0.49	1.38	1.46	1.98	2.4	3.02	0.83	0	4.03	5.39	3.61	1.72	0.87	2.39	2.64	1.57	1.26	1.5	1.68	0	7	10	1	0	1	4	5	11	9	7	2	0	8	23	25	6	3	11	17	7	2	4	9	0	Chr01
Glyma.01G026300.Wm82.a2.v1	0	0	0	0	0	0	0	0	0	0	0	0	0	0	0.28	0	0	0	0	0	0	0	0	0	0	0	0	0	0	0	0	0	0	0	0	0	0	0	1	0	0	0	0	0	0	0	0	0	Chr01
Glyma.01G026400.Wm82.a2.v1	1.26	0.24	0.96	2.2	0.41	0.29	0.74	2.12	0.22	0.73	0.35	1.02	1.27	1.58	0.97	0.72	0.98	1.46	0.92	0.76	1.06	1.89	0.94	1.2	4	1	2	5	1	1	3	14	1	2	1	1	3	8	8	3	4	8	7	4	2	6	6	2	Chr01
Glyma.01G026500.Wm82.a2.v1	10.59	5.64	28	23.81	8.97	8.5	7.58	11.95	5.26	3.19	7.68	4.5	9.92	10.68	9.79	9.53	11.13	9.64	9.38	5.53	5.41	5.98	2.3	4.38	23	16	40	37	15	20	21	54	16	6	15	3	16	37	55	27	31	36	49	20	7	13	10	5	Chr01
Glyma.01G026600.Wm82.a2.v1	0	0	0	1.85	0	0	0	0	0	0.76	0	0	0	1.24	0.51	0	0	0	0.55	0.4	0	0	0.33	0	0	0	0	2	0	0	0	0	0	1	0	0	0	3	2	0	0	0	2	1	0	0	1	0	Chr01
Glyma.01G026700.Wm82.a2.v1	18.34	15.7	23.16	26.07	23.81	19.81	11.45	18.83	7.33	7.9	7.95	8.1	14.64	19.68	21.15	14.54	24.49	17.9	14.86	9.7	5.22	8.08	11.79	6.5	59	66	49	60	59	69	47	126	33	22	23	8	35	101	176	61	101	99	115	52	10	26	76	11	Chr01
Glyma.01G026800.Wm82.a2.v1	17.37	17.18	7.73	15.99	20.9	25.82	13.28	26.07	13.32	9.79	8.95	12.42	21.1	13.82	12.45	18.2	30.07	32.54	21.49	13.73	16.36	11.44	9.09	9.67	41	53	12	27	38	66	40	128	44	20	19	9	37	52	76	56	91	132	122	54	23	27	43	12	Chr01
Glyma.01G026900.Wm82.a2.v1	2.52	1.29	1.28	1.17	1.09	0.78	2.63	2.42	2.4	0.97	0.93	0	1.13	0.53	1.3	2.58	1.31	2.44	1.05	0.5	0	0.84	2.1	1.6	3	2	1	1	1	1	4	6	4	1	1	0	1	1	4	4	2	5	3	1	0	1	5	1	Chr01
Glyma.01G027200.Wm82.a2.v1	0	0	0	0	0	0	0	0.81	0	0	0	0	0	0	0	0	0	0	0	0	0	0	0	0	0	0	0	0	0	0	0	4	0	0	0	0	0	0	0	0	0	0	0	0	0	0	0	0	Chr01
Glyma.01G027300.Wm82.a2.v1	11.27	7.7	10.41	10.69	6.79	8.55	8.83	8.52	4.03	5.12	3.58	2.62	12.46	15.4	12.45	4.94	9.42	4.92	7.7	6.04	4.06	5.23	3.82	1.53	28	25	17	19	13	23	28	44	14	11	8	2	23	61	80	16	30	21	46	25	6	13	19	2	Chr01
Glyma.01G027600.Wm82.a2.v1	0.29	0.9	0.45	0.82	0.38	0.81	0.46	0.99	0.42	0	0.98	0.96	1.58	0.55	0.57	0	0.23	1.54	1.71	0.88	0	0.88	0.73	0	1	4	1	2	1	3	2	7	2	0	3	1	4	3	5	0	1	9	14	5	0	3	5	0	Chr01
Glyma.01G027700.Wm82.a2.v1	17.29	17.84	19.44	35.74	27.33	24.3	11.78	22.41	13.97	13.03	8.36	2.45	18.22	18.86	20.34	24.8	22.87	21.87	20.32	25.72	13.89	12.03	9.01	15.73	23	31	17	34	28	35	20	62	26	15	10	1	18	40	70	43	39	50	65	57	11	16	24	11	Chr01
Glyma.01G027800.Wm82.a2.v1	0.74	2.54	1.12	0.52	1.91	1.02	3.76	3.01	2.37	0.85	1.23	0	3.48	1.39	2.85	1.7	3.16	4.29	5.21	4.43	1.86	2.21	1.84	0.7	2	9	2	1	4	3	13	17	9	2	3	0	7	6	20	6	11	20	34	20	3	6	10	1	Chr01
Glyma.01G028100.Wm82.a2.v1	0.46	0.35	2.81	0.65	0	0	0.18	0.22	0.33	0	0	0	1.56	0.87	1.52	0.18	0	0	0	0	0.78	0.23	0	0.44	2	2	8	2	0	0	1	2	2	0	0	0	5	6	17	1	0	0	0	0	2	1	0	1	Chr01
Glyma.01G028200.Wm82.a2.v1	10.32	5.26	4.18	5.77	6.25	4.45	3.23	6.61	9.34	3.18	6.12	2.24	6.48	2.59	3.72	6.86	3.22	6.4	4.29	6.19	9.24	4.13	7.21	1.31	15	10	4	6	7	7	6	20	19	4	8	1	7	6	14	13	6	16	15	15	8	6	21	1	Chr01
Glyma.01G028300.Wm82.a2.v1	0	0.86	0	0	0	0	0.44	1.34	0.4	0	0	0	0	0	0.43	0.43	0	0	0	0	0	0.56	0.56	0	0	2	0	0	0	0	1	5	1	0	0	0	0	0	2	1	0	0	0	0	0	1	2	0	Chr01
Glyma.01G028500.Wm82.a2.v1	15.6	3.77	21.22	0	0	0.76	0.64	0.79	0.59	3.79	1.83	0	5.53	5.66	11.42	0	0	0.96	2.05	1.48	2.76	1.64	1.23	0	19	6	17	0	0	1	1	2	1	4	2	0	5	11	36	0	0	2	6	3	2	2	3	0	Chr01
Glyma.01G028600.Wm82.a2.v1	11.06	6.88	0.53	1.45	3.14	2.23	1.08	2.33	0.74	1.2	0	0	8.84	12.35	12.43	3.18	1.35	1.81	0.72	0.62	0	0	0	0.66	32	26	1	3	7	7	4	14	3	3	0	0	19	57	93	12	5	9	5	3	0	0	0	1	Chr01
Glyma.01G028700.Wm82.a2.v1	10.75	9.51	7.27	5.01	7.76	8.83	8.99	8.27	7.34	4.14	5.85	7.01	13.19	8.39	12.19	7.15	8.39	9.87	9.04	8.46	12.04	5.26	5.01	5	45	52	20	15	25	40	48	72	43	15	22	9	41	56	132	39	45	71	91	59	30	22	42	11	Chr01
Glyma.01G028800.Wm82.a2.v1	18.42	20.07	38.18	4.68	1.45	2.58	1.31	2.41	1.2	0	0.62	0	32.3	19.95	19.85	2.14	3.92	4.22	1.16	0.67	3.75	0.56	0	0	33	47	45	6	2	5	3	9	3	0	1	0	43	57	92	5	9	13	5	2	4	1	0	0	Chr01
Glyma.01G028900.Wm82.a2.v1	74.2	74.46	39.46	53.85	42.64	54.29	17.47	45.81	19.99	13.12	8.12	11.89	79.14	72.71	73.34	52.24	50.6	46.71	30.18	25.79	27.23	8.11	15.98	17.73	183	240	64	95	81	145	55	235	69	28	18	9	145	286	468	168	160	198	179	106	40	20	79	23	Chr01
Glyma.01G029000.Wm82.a2.v1	14.62	9.4	11.56	15.53	6.83	7.02	11.46	10.96	8.36	8.78	17.56	1.91	11.02	15.4	15.37	6.73	10.49	16.67	9.48	10.88	3.93	9.35	10.8	8.9	25	21	13	19	9	13	25	39	20	13	27	1	14	42	68	15	23	49	39	31	4	16	37	8	Chr01
Glyma.01G029100.Wm82.a2.v1	5.7	3.02	6	7.35	3.98	4.05	3.09	3.79	2.19	2.03	1.95	2.85	1.77	2.75	7.45	4.03	5.47	3.82	5.1	3.94	3.68	2.63	3.28	1.67	13	9	9	12	7	10	9	18	7	4	4	2	3	10	44	12	16	15	28	15	5	6	15	2	Chr01
Glyma.01G029200.Wm82.a2.v1	388.66	422.05	353.97	442.78	533.1	636.16	565.3	547.6	534.13	457.21	499	345.03	329.53	374.33	337.15	530.67	646.06	565.94	446.16	443.36	499.09	325.15	394.39	317.31	778	1104	466	634	822	1379	1444	2280	1496	792	898	212	490	1195	1746	1385	1658	1947	2148	1479	595	651	1582	334	Chr01
Glyma.01G029300.Wm82.a2.v1	0.56	0	0	0	0	0	0	0	0.4	0	0	0	0	0.71	0.22	0	0	0	0	0	0	0	0.56	0	1	0	0	0	0	0	0	0	1	0	0	0	0	2	1	0	0	0	0	0	0	0	2	0	Chr01
Glyma.01G029500.Wm82.a2.v1	3.99	3.05	3.64	3.34	5.86	3.44	3.75	5.75	5.13	2.15	2.07	2.6	3.58	5.66	5.03	4.69	4.97	3.25	3.54	3.19	3.12	3.98	5.44	4.04	15	15	9	9	17	14	18	45	27	7	7	3	10	34	49	23	24	21	32	20	7	15	41	8	Chr01
Glyma.01G029600.Wm82.a2.v1	19.93	17.54	15.91	18.81	23.93	22.08	20.69	18.68	13.89	12.09	12.75	11.36	19.45	28.12	23.69	18.34	22.93	20.29	18.44	15.25	7.53	6.97	10.19	8.53	40	46	21	27	37	48	53	78	39	21	23	7	29	90	123	48	59	70	89	51	9	14	41	9	Chr01
Glyma.01G029700.Wm82.a2.v1	0.98	2.26	1.5	2.75	0.64	0.45	0.39	2.36	0.7	0.57	0	0	3.97	2.16	3.61	3.77	1.53	6.58	3.89	2.36	2.48	1.97	3.19	1.87	2	6	2	4	1	1	1	10	2	1	0	0	6	7	19	10	4	23	19	8	3	4	13	2	Chr01
Glyma.01G029800.Wm82.a2.v1	87.73	104.29	46.14	89.48	98.85	100.89	52.75	73.48	46.53	32.52	44.19	21.57	117.36	143.58	128.82	98.18	104.15	97.28	71.35	72.18	64.85	25.38	36.9	31.48	159	247	55	116	138	198	122	277	118	51	72	12	158	415	604	232	242	303	311	218	70	46	134	30	Chr01
Glyma.01G029900.Wm82.a2.v1	0.37	0.84	0	0.51	0.47	1.35	0.57	1.05	0	0	0.41	0	0	0.46	0.28	2.24	1.99	1.91	0.61	0.22	0	0.37	0.36	0	1	3	0	1	1	4	2	6	0	0	1	0	0	2	2	8	7	9	4	1	0	1	2	0	Chr01
Glyma.01G030000.Wm82.a2.v1	6.23	21.7	1.05	5.8	11.67	7.03	1.08	5.32	2.47	3.2	0	0	17.69	18.65	9.89	3.18	3.78	4.83	2.01	1.66	4.65	2.07	1.04	1.32	9	41	1	6	13	11	2	16	5	4	0	0	19	43	37	6	7	12	7	4	4	3	3	1	Chr01
Glyma.01G030300.Wm82.a2.v1	0	0.38	0	4.19	1.3	0.46	1.57	1.44	0.71	0	0	3.25	1.35	1.25	1.16	1.15	3.9	0.58	0.62	0	0.84	0	1	0	0	1	0	6	2	1	4	6	2	0	0	2	2	4	6	3	10	2	3	0	1	0	4	0	Chr01
Glyma.01G030400.Wm82.a2.v1	1.74	0.27	3.71	5.35	0	0.96	0.27	1.34	1.24	0.4	1.55	0	2.81	3.27	3.09	1.07	2.17	1.22	1.3	2.92	2.34	2.09	2.61	0.66	5	1	7	11	0	3	1	8	5	1	4	0	6	15	23	4	8	6	9	14	4	6	15	1	Chr01
Glyma.01G030500.Wm82.a2.v1	2.32	1.42	2.12	10.39	7.84	7.29	3.64	5.81	3.98	4.83	2.58	4.54	5	2.04	5.57	11.04	9.78	7.57	4.63	4.74	5.46	6.04	3.48	2.65	5	4	3	16	13	17	10	26	12	9	5	3	8	7	31	31	27	28	24	17	7	13	15	3	Chr01
Glyma.01G030600.Wm82.a2.v1	53.44	47.98	45.5	74.7	85.1	78.29	50.25	76.04	49.39	30.46	42.8	23.21	63.3	67.46	67.2	76.5	80.58	96.59	85.91	76.1	55.03	32.77	41.24	40.65	75	88	42	75	92	119	90	222	97	37	54	10	66	151	244	140	145	233	290	178	46	46	116	30	Chr01
Glyma.01G030800.Wm82.a2.v1	84.65	92.88	60.71	112.75	123.37	119.46	63.2	90.99	62.21	50.75	47.08	52.03	76.32	77.61	80.56	85.74	112.12	101.75	78.02	61.81	53.63	46.31	44.63	31.89	106	152	50	101	119	162	101	237	109	55	53	20	71	155	261	140	180	219	235	129	40	58	112	21	Chr01
Glyma.01G030900.Wm82.a2.v1	21.21	24.34	4.24	4.29	4.35	3.87	2.41	5.9	3.79	1.93	2.48	0	20.28	43.57	28.91	3.21	5.44	6.49	4.52	3.85	0.47	1.95	2.23	1.59	76	114	10	11	12	15	11	44	19	6	8	0	54	249	268	15	25	40	39	23	1	7	16	3	Chr01
Glyma.01G031200.Wm82.a2.v1	3.55	4.07	5.4	7.44	9.22	10.65	5.56	7.25	5.71	4.1	5.92	5.78	2.39	7.23	3.43	10.21	9	10.84	6.27	5.32	2.98	5.32	5.76	6.75	4	6	4	6	8	13	8	17	9	4	6	2	2	13	10	15	13	21	17	10	2	6	13	4	Chr01
Glyma.01G031300.Wm82.a2.v1	3.02	2.82	0	2.81	4.79	7.74	1.84	3.06	0.24	1.16	0	0	0.45	1.05	2.07	6.43	7.32	2.54	1.25	1.21	0	0	0.5	0.64	9	11	0	6	11	25	7	19	1	3	0	0	1	5	16	25	28	13	9	6	0	0	3	1	Chr01
Glyma.01G031400.Wm82.a2.v1	9.48	10.88	8.31	15.03	12.07	10.44	10.71	13.5	10.68	7.37	5.07	5.94	11.29	12.12	10.43	12.02	11.52	14.21	13.72	14.55	11.32	8.02	6.82	12.48	52	78	30	59	51	62	75	154	82	35	25	10	46	106	148	86	81	134	181	133	37	44	75	36	Chr01
Glyma.01G031500.Wm82.a2.v1	2.33	0.76	2.53	2.33	0.86	0.61	0.78	1.12	0.95	0	0.37	1.08	0.9	2.92	5.01	1.79	1.3	1.35	1.66	1.2	1.12	1.66	0.17	1.9	7	3	5	5	2	2	3	7	4	0	1	1	2	14	39	7	5	7	12	6	2	5	1	3	Chr01
Glyma.01G031700.Wm82.a2.v1	21.1	28.44	12.98	25.28	22.82	40.35	22.83	37.91	13.28	12.77	13.41	9.82	19.61	29.92	20.77	26.2	28.6	38.58	24.43	19.59	8.43	7.03	12.78	12.42	42	74	17	36	35	87	58	157	37	22	24	6	29	95	107	68	73	132	117	65	10	14	51	13	Chr01
Glyma.01G031800.Wm82.a2.v1	0.49	0.37	2.61	2.74	1.91	1.58	0.77	1.88	1.05	1.42	0.54	3.19	0.33	0.46	0.19	3.01	2.48	0.86	1.12	1.76	2.47	2.45	2.08	0.93	2	2	7	8	6	7	4	16	6	5	2	4	1	3	2	16	13	6	11	12	6	10	17	2	Chr01
Glyma.01G031900.Wm82.a2.v1	1.96	2.17	6.3	2.44	1.13	1.81	0.17	0.84	0.16	0.25	0	0	4.4	1.78	5.39	1.34	1.19	0.89	0.45	0.79	0.37	0.44	0.44	0	9	13	19	8	4	9	1	8	1	1	0	0	15	13	64	8	7	7	5	6	1	2	4	0	Chr01
Glyma.01G032000.Wm82.a2.v1	28	18.19	11.88	15.02	14.37	8.42	1.53	10.02	2.79	1.13	1.09	1.06	25.86	20.01	23.03	10.49	10.41	5.87	4.06	1.37	2.73	1.95	1.3	1.24	86	73	24	33	34	28	6	64	12	3	3	1	59	98	183	42	41	31	30	7	5	6	8	2	Chr01
Glyma.01G032100.Wm82.a2.v1	6.69	7.26	4.59	5.73	6.72	3.39	4.23	4.46	2.31	3.74	2.4	4.92	8.13	5.28	8.25	3.97	5.38	4.02	5.38	4.66	2.54	1.29	2.37	4.1	31	44	14	19	24	17	25	43	15	15	10	7	28	39	99	24	32	32	60	36	7	6	22	10	Chr01
Glyma.01G032200.Wm82.a2.v1	1.59	2.12	1.21	1.11	2.57	4.4	1.87	3.43	4.82	2.29	0.44	2.58	1.6	1.99	0.61	4.56	5.26	6.46	5.11	3.57	2	0.79	2.18	1.51	4	7	2	2	5	12	6	18	17	5	1	2	3	8	4	15	17	28	31	15	3	2	11	2	Chr01
Glyma.01G032300.Wm82.a2.v1	9.96	6.48	5.3	2.79	5.17	1.84	3.12	2.16	2.49	2.3	1.66	0	4.02	4.69	6.55	4.2	4.27	2.03	3.94	0.9	1.67	2.49	2.98	1.89	20	17	7	4	8	4	8	9	7	4	3	0	6	15	34	11	11	7	19	3	2	5	12	2	Chr01
Glyma.01G032400.Wm82.a2.v1	0	0.7	0	0	0	0	0	0	0	0	0	0	0.41	0.19	0.23	0	0	0	0	0	0	0	0	0	0	6	0	0	0	0	0	0	0	0	0	0	2	2	4	0	0	0	0	0	0	0	0	0	Chr01
Glyma.01G032500.Wm82.a2.v1	10.69	9.23	6.25	11.49	15.3	10.63	8.38	13.44	12.93	8.23	12.19	0.89	8.48	15.46	12.29	11.56	14.11	14.19	11.74	11.68	10.58	8.22	6.56	4.69	39	44	15	30	43	42	39	102	66	26	40	1	23	90	116	55	66	89	103	71	23	30	48	9	Chr01
Glyma.01G032600.Wm82.a2.v1	8.73	4.22	2.1	10.92	7.76	8.06	2.88	9.28	4.93	6.9	5.62	1.5	8.04	10.08	4.97	9.52	11.83	11.76	10.7	8.27	15.43	8.27	9.4	6.99	19	12	3	17	13	19	8	42	15	13	11	1	13	35	28	27	33	44	56	30	20	18	41	8	Chr01
Glyma.01G032800.Wm82.a2.v1	0	0	0	0.92	0	0	0	0	0	0	0	0	0	0	0	0	0	0	0	0	0	0	0	0	0	0	0	1	0	0	0	0	0	0	0	0	0	0	0	0	0	0	0	0	0	0	0	0	Chr01
Glyma.01G032900.Wm82.a2.v1	0	0.17	0	0	0	0	0	0	0	0	0	0	0	0	0	0	0	0	0.19	0	0	0	0	0	0	1	0	0	0	0	0	0	0	0	0	0	0	0	0	0	0	0	2	0	0	0	0	0	Chr01
Glyma.01G033000.Wm82.a2.v1	2.79	4.88	1.82	6.68	2.58	2.57	3.12	1.72	2.28	0.92	3.1	0	0.54	2	1.39	0.92	1.86	0.7	1.82	1.91	3.34	0	0.99	0.76	7	16	3	12	5	7	10	9	8	2	7	0	1	8	9	3	6	3	11	8	5	0	5	1	Chr01
Glyma.01G033200.Wm82.a2.v1	1.67	1.86	1.39	0.43	0	0.28	0.24	0.88	0	0.53	0.68	0.5	0.2	0.38	0.35	0.23	0	0.09	0.38	0.64	0.26	0	0.53	0	11	16	6	2	0	2	2	12	0	3	4	1	1	4	6	2	0	1	6	7	1	0	7	0	Chr01
Glyma.01G033400.Wm82.a2.v1	0	0	0	0	0	0	0	0	0	0	0	0	2.09	3.9	5.41	3.58	1.21	0.9	3.88	2.8	7.83	0	3.1	0	0	0	0	0	0	0	0	0	0	0	0	0	1	4	9	3	1	1	6	3	3	0	4	0	Chr01
Glyma.01G033500.Wm82.a2.v1	0	0	0	3.58	5.99	1.42	4.82	6.16	10.26	1.78	5.13	6.68	0	0	0.2	16.9	6.8	14.91	14.92	20.91	22.37	13.83	11	6.82	0	0	0	5	9	3	12	25	28	3	9	4	0	0	1	43	17	50	70	68	26	27	43	7	Chr01
Glyma.01G033700.Wm82.a2.v1	11.5	18.04	7	0.8	1.49	0.53	1.8	1.11	2.88	0.66	1.28	3.75	26.32	19.83	14.01	7.94	5.83	1.67	1.2	1.04	0.97	1.15	0.29	0	20	41	8	1	2	1	4	4	7	1	2	2	34	55	63	18	13	5	5	3	1	2	1	0	Chr01
Glyma.01G033800.Wm82.a2.v1	20.47	9.48	63.08	6.78	2.1	1.99	1.69	4.66	1.16	1.25	1.8	1.76	18.13	17.57	26.24	1.24	6.3	3.45	2.91	4.53	1.81	1.08	2.96	0	38	23	77	9	3	4	4	18	3	2	3	1	25	52	126	3	15	11	13	14	2	2	11	0	Chr01
Glyma.01G033900.Wm82.a2.v1	2.64	1.68	2	1.23	2.28	0.81	1.72	1.27	0.94	2.03	1.47	0	1.18	3.31	2.21	0.34	1.03	1.28	0.55	1.05	0.74	0.44	1.1	1.67	6	5	3	2	4	2	5	6	3	4	3	0	2	12	13	1	3	5	3	4	1	1	5	2	Chr01
Glyma.01G034000.Wm82.a2.v1	323.84	354.41	17.21	3.65	2.26	0	0	0.84	0	0	0	0	375.01	393.56	308.9	0	1.36	0	0.36	0	0	0	0	0	372	532	13	3	2	0	0	2	0	0	0	0	320	721	918	0	2	0	1	0	0	0	0	0	Chr01
Glyma.01G034100.Wm82.a2.v1	2.23	1.07	2.12	0	0.72	0.26	0.87	0.4	1.39	0.32	0	0	1.5	0.35	2.05	0.43	1.74	0.32	0.93	2.34	1.4	0	0.28	1.59	8	5	5	0	2	1	4	3	7	1	0	0	4	2	19	2	8	2	8	14	3	0	2	3	Chr01
Glyma.01G034200.Wm82.a2.v1	0	0.4	0	0	0	0	0.41	0	0	0	0	0	0	0	0	0	0	0	0	0	0	0	0	0	0	1	0	0	0	0	1	0	0	0	0	0	0	0	0	0	0	0	0	0	0	0	0	0	Chr01
Glyma.01G034300.Wm82.a2.v1	5.4	4.41	1.09	3.52	2.8	3.99	2.26	4.5	2.83	2.91	3.2	2.35	2.42	3.61	2.78	3.86	3.93	4.82	2.1	2.59	4.83	2.88	2.87	2.05	15	16	2	7	6	12	8	26	11	7	8	2	5	16	20	14	14	23	14	12	8	8	16	3	Chr01
Glyma.01G034500.Wm82.a2.v1	0	0	0	0	1.3	0	0	0	0	0	0	0	0	0	0	0	0	0	0.42	0	0	0	0.5	1.9	0	0	0	0	1	0	0	0	0	0	0	0	0	0	0	0	0	0	1	0	0	0	1	1	Chr01
Glyma.01G034600.Wm82.a2.v1	0.44	0.33	0	0	0	0	0	0.21	0	0	0	0	0	0.27	0.17	0	0	0	0	0.26	0	0	0	0	1	1	0	0	0	0	0	1	0	0	0	0	0	1	1	0	0	0	0	1	0	0	0	0	Chr01
Glyma.01G034700.Wm82.a2.v1	0.35	0	0	0	0	0	0	0	0	0	0	0	0	0	0.4	0	0	0	0	0	0	0	0	0	1	0	0	0	0	0	0	0	0	0	0	0	0	0	3	0	0	0	0	0	0	0	0	0	Chr01
Glyma.01G034900.Wm82.a2.v1	9.87	6.34	3.6	0	0.51	3.65	0.62	2.66	3.67	2.74	2.2	1.29	6.38	8.66	7.32	5.15	4.31	2.76	5.09	3.55	3.98	2.37	2.56	5.26	25	21	6	0	1	10	2	14	13	6	5	1	12	35	48	17	14	12	31	15	6	6	13	7	Chr01
Glyma.01G035000.Wm82.a2.v1	5.28	3.33	0	13.89	18.95	9.75	1.22	7.91	2.89	1.08	0.35	3.04	5.43	4.67	3.36	14.29	13.08	8.13	2.97	1.12	1.56	1.55	0.62	0	17	14	0	32	47	34	5	53	13	3	1	3	13	24	28	60	54	45	23	6	3	5	4	0	Chr01
Glyma.01G035100.Wm82.a2.v1	22.63	20.32	11.47	16.87	26.25	39.85	33.11	17.84	30.41	12.2	10.41	21.63	23.97	26.3	26.94	26.85	21.18	29.67	26.85	24.44	28.88	10.86	13.85	15.49	75	88	25	40	67	143	140	123	141	35	31	22	59	139	231	116	90	169	214	135	57	36	92	27	Chr01
Glyma.01G035300.Wm82.a2.v1	8.64	8.65	3.03	0.93	1.73	0	0.52	0.96	0	0	0	0	9.84	5.84	7.71	0.51	1.04	1.55	1.66	1.6	3.35	1.99	0.33	3.79	13	17	3	1	2	0	1	3	0	0	0	0	11	14	30	1	2	4	6	4	3	3	1	3	Chr01
Glyma.01G035400.Wm82.a2.v1	0.2	0.15	0	0	0	0	0	0.19	0.14	0	0.67	0.65	0	0.38	0.62	0	0	0.23	0.17	0	0.33	0.4	0	0.38	1	1	0	0	0	0	0	2	1	0	3	1	0	3	8	0	0	2	2	0	1	2	0	1	Chr01
Glyma.01G035600.Wm82.a2.v1	0	0	0	0	0	0	0.41	0.51	0.38	0	0	0	0	0.33	0	0.4	0	0	0.22	0	0	0	1.58	0	0	0	0	0	0	0	1	2	1	0	0	0	0	1	0	1	0	0	1	0	0	0	6	0	Chr01
Glyma.01G035700.Wm82.a2.v1	8.11	10.34	13.01	3.78	8.19	8.32	2.47	5.85	2.9	1.56	1	0	14.55	6.21	7.31	6.91	5.27	6.03	4.31	2.43	9.08	1.35	2.92	3.43	18	30	19	6	14	20	7	27	9	3	2	0	24	22	42	20	15	23	23	9	12	3	13	4	Chr01
Glyma.01G036000.Wm82.a2.v1	0.87	0	0	2.44	3.96	1.21	1.37	1.26	2.8	0	0	0	0.59	1.09	1.18	1.67	1.7	1.52	1.63	1.57	2.2	1.74	0	3.32	2	0	0	4	7	3	4	6	9	0	0	0	1	4	7	5	5	6	9	6	3	4	0	4	Chr01
Glyma.01G036200.Wm82.a2.v1	1.18	1.13	1.79	2.88	0.76	1.09	0.46	1.98	1.68	0.68	1.31	0	1.19	1.29	1.36	1.58	0.92	2.23	1.1	1.94	2.47	0.88	1.47	0	4	5	4	7	2	4	2	14	8	2	4	0	3	7	12	7	4	13	9	11	5	3	10	0	Chr01
Glyma.01G036300.Wm82.a2.v1	0	0	0	0	0	0	0	0	0	0	0	0	0	0	0	0	0	1.26	0	0	0	0	0	0	0	0	0	0	0	0	0	0	0	0	0	0	0	0	0	0	0	2	0	0	0	0	0	0	Chr01
Glyma.01G036500.Wm82.a2.v1	18.98	16.2	19.42	11.22	11.84	12.47	8.58	10.35	9.91	7.17	4.87	5.94	21.12	17.62	20.31	14.27	12.81	8.71	12.9	11.39	13.48	8.03	6.74	11.1	52	58	35	22	25	37	30	59	38	17	12	5	43	77	144	51	45	41	85	52	22	22	37	16	Chr01
Glyma.01G036700.Wm82.a2.v1	4.87	5.73	2.28	8.38	6.32	6.57	2.35	5.94	5.09	1.73	1.67	0	4.03	5.64	5.36	5.46	7.6	3.71	3.58	6.07	3.14	3.75	3.74	5.7	13	20	4	16	13	19	8	33	19	4	4	0	8	24	37	19	26	17	23	27	5	10	20	8	Chr01
Glyma.01G036800.Wm82.a2.v1	0	0	0	0	0	0	0	0	0	0	0	0	0.53	0.25	0.3	0	0.61	0.23	0	0	0	0.39	0	0	0	0	0	0	0	0	0	0	0	0	0	0	1	1	2	0	2	1	0	0	0	1	0	0	Chr01
Glyma.01G036900.Wm82.a2.v1	0	0.62	0	0	0	0	0	0	0	0	0	0	0	0	0	0	0	0.47	0	0	0	0	0.2	0	0	2	0	0	0	0	0	0	0	0	0	0	0	0	0	0	0	2	0	0	0	0	1	0	Chr01
Glyma.01G037200.Wm82.a2.v1	1.64	0	0.62	0	0	0	0.64	0	0	0.47	0.46	0	0.55	0.52	0.79	1.26	0.32	0.24	0	0	0	0.41	0	0	4	0	1	0	0	0	2	0	0	1	1	0	1	2	5	4	1	1	0	0	0	1	0	0	Chr01
Glyma.01G037300.Wm82.a2.v1	16.24	15.13	16.1	19.74	18.79	13.69	12.17	13.92	13.37	7.34	5.5	4.6	10.93	15.05	18.83	20.85	14.59	13.14	11.89	8.05	8.3	5.29	8.28	10.74	46	56	30	40	41	42	44	82	53	18	14	4	23	68	138	77	53	64	81	38	14	15	47	16	Chr01
Glyma.01G037400.Wm82.a2.v1	4.09	5.56	6.91	12.7	12.98	16.36	10.68	8.52	7.14	5.25	8.59	5.92	5.51	4.27	5.44	8.02	15.24	9.52	6.61	7.63	6.87	6.36	4.54	7.78	9	16	10	20	22	39	30	39	22	10	17	4	9	15	31	23	43	36	35	28	9	14	20	9	Chr01
Glyma.01G037500.Wm82.a2.v1	0	2.05	0	1.87	0.87	3.71	1.05	0.96	4.3	3.87	1.49	0	5.4	2.1	0.78	2.05	3.65	1.56	1.11	2.01	1.12	1.34	1	1.27	0	4	0	2	1	6	2	3	9	5	2	0	6	5	3	4	7	4	4	5	1	2	3	1	Chr01
Glyma.01G037600.Wm82.a2.v1	0	0	0	0	0.31	0	0.19	0	0	0	0	0	0	0	0	0	0	0	0	0	0	0	0	0	0	0	0	0	1	0	1	0	0	0	0	0	0	0	0	0	0	0	0	0	0	0	0	0	Chr01
Glyma.01G037700.Wm82.a2.v1	2.52	1.23	1.74	2.56	3.56	4.86	2.87	3.52	3.11	5.29	2.8	5.22	0.31	2.01	1.68	2.81	1.07	3.33	2.47	3.29	2.69	2.52	3.88	3.05	11	7	5	8	12	23	16	32	19	20	11	7	1	14	19	16	6	25	26	24	7	11	34	7	Chr01
Glyma.01G037800.Wm82.a2.v1	0	0	0	0	0	0	0	0.23	0	0	0	0	2.62	0	0.38	0	0	0.28	1.42	0.29	0	0	0	0	0	0	0	0	0	0	0	1	0	0	0	0	4	0	2	0	0	1	7	1	0	0	0	0	Chr01
Glyma.01G037900.Wm82.a2.v1	2	2.81	0.51	3.26	2.16	3.39	0.78	1.76	1.67	0.77	0.74	0	4.94	4.6	7.22	1.28	2.34	2.52	1.66	1	2.24	0.67	1	0	6	11	1	7	5	11	3	11	7	2	2	0	11	22	56	5	9	13	12	5	4	2	6	0	Chr01
Glyma.01G038100.Wm82.a2.v1	3.43	2.33	2.32	0.53	1.48	1.23	0.15	0.92	0.27	0	0.42	0.62	2.05	2.39	1.91	1.02	0.45	0.78	0.71	0.8	0	0.57	0.09	0	18	16	8	2	6	7	1	10	2	0	2	1	8	20	26	7	3	7	9	7	0	3	1	0	Chr01
Glyma.01G038200.Wm82.a2.v1	32.71	27.21	17.3	49.71	35.08	24.95	15.6	34.87	16.26	6.57	23.73	9.27	28.72	35.67	27.49	19.63	29.95	23.17	20.11	26.46	26.27	9.95	10.65	24.34	23	25	8	25	19	19	14	51	16	4	15	2	15	40	50	18	27	28	34	31	11	7	15	9	Chr01
Glyma.01G038300.Wm82.a2.v1	0.33	0.25	1.26	0.93	0.43	0.46	0.13	1.51	0.71	0.57	0.37	0	0.89	1.35	1.15	0.25	0.39	0.77	0.96	0.3	0.28	0.5	0.17	0.31	2	2	5	4	2	3	1	19	6	3	2	0	4	13	18	2	3	8	14	3	1	3	2	1	Chr01
Glyma.01G038400.Wm82.a2.v1	5.94	4.96	3.69	3.39	5.95	4.98	4.44	5.06	3.28	3.12	3.6	0.88	5.45	7.78	5.42	4.14	7.37	5.65	5.05	6.31	5.44	6.74	6.46	5.13	22	24	9	9	17	20	21	39	17	10	12	1	15	46	52	20	35	36	45	39	12	25	48	10	Chr01
Glyma.01G038500.Wm82.a2.v1	0	0.46	0	0	0	0	0	0	0	0	0	0	1.61	2.63	1.16	0.23	0.47	0.35	0.62	0.18	0	0.6	0.9	1.14	0	2	0	0	0	0	0	0	0	0	0	0	4	14	10	1	2	2	5	1	0	2	6	2	Chr01
Glyma.01G038600.Wm82.a2.v1	4.94	8.64	10.19	1.97	5.95	5.21	9.67	4.41	7.31	2.45	4.31	9.19	2.37	3.54	3.14	6.49	4.68	6.57	4.55	3.81	2.37	2.47	3.52	0.67	14	32	19	4	13	16	35	26	29	6	11	8	5	16	23	24	17	32	31	18	4	7	20	1	Chr01
Glyma.01G038700.Wm82.a2.v1	8.76	5.13	7.84	5.04	5.35	2.38	1.21	4.21	5.89	2.98	2.29	0	3.47	6.14	7.37	8.3	3.62	6.6	2.79	4.33	3.46	3.61	3.6	4.9	17	13	10	7	8	5	3	17	16	5	4	0	5	19	37	21	9	22	13	14	4	7	14	5	Chr01
Glyma.01G038800.Wm82.a2.v1	27	23.16	18.04	23.45	29.21	13.22	9.94	15.54	7.31	6.15	6.83	14.66	31.94	19.75	22.93	21.65	19.46	14.04	13.27	12.03	16.48	11.86	8.57	10.11	66	74	29	41	55	35	31	79	25	13	15	11	58	77	145	69	61	59	78	49	24	29	42	13	Chr01
Glyma.01G038900.Wm82.a2.v1	0.45	2.09	11.06	2.54	2.95	0	2.14	1.75	2.27	1.05	0.51	0	1.84	1.43	3.16	3.14	1.77	2.12	1.32	1.09	0.76	0.91	0.45	1.73	1	6	16	4	5	0	6	8	7	2	1	0	3	5	18	9	5	8	7	4	1	2	2	2	Chr01
Glyma.01G039000.Wm82.a2.v1	1.37	1.52	0.7	0.64	0.2	0.14	0	0.29	0	0.18	0	0	0.82	0.86	2.06	0.58	0.12	0	0.13	0	0	0	0.15	0	9	13	3	3	1	1	0	4	0	1	0	0	4	9	35	5	1	0	2	0	0	0	2	0	Chr01
Glyma.01G039100.Wm82.a2.v1	7.17	6.1	10.9	23.39	10.34	13.98	3.12	14.56	6.26	2.76	2.66	5.19	3.22	10.99	6.47	4.89	6.84	7.88	7.62	5.74	2.68	3.98	1.19	1.52	9	10	9	21	10	19	5	38	11	3	3	2	3	22	21	8	11	17	23	12	2	5	3	1	Chr01
Glyma.01G039200.Wm82.a2.v1	14.09	15.58	7.14	2.92	4.07	4.82	2.45	6.02	1.87	3.62	2.32	5.1	9.13	16.36	11.7	7.21	5.7	5.16	3.26	2.19	0.88	1.04	2.34	0.99	27	39	9	4	6	10	6	24	5	6	4	3	13	50	58	18	14	17	15	7	1	2	9	1	Chr01
Glyma.01G039400.Wm82.a2.v1	0.98	0.75	0	2.73	3.8	0.9	0.38	0.94	0.7	0.56	0	0	0	0.61	0	1.12	0.38	1.14	0	0.29	0	0	0.73	0	2	2	0	4	6	2	1	4	2	1	0	0	0	2	0	3	1	4	0	1	0	0	3	0	Chr01
Glyma.01G039500.Wm82.a2.v1	2.54	1.95	2.81	1.29	1.2	0.85	0.54	1.11	0.17	0	0.26	0	2.8	3.19	1.97	0.35	1.26	0.67	0.38	0.56	0	1.39	0.35	0.44	11	11	8	4	4	4	3	10	1	0	1	0	9	22	22	2	7	5	4	4	0	6	3	1	Chr01
Glyma.01G039600.Wm82.a2.v1	2.63	2.23	0.89	0.82	0	0.27	0.46	0	0	0.34	0	0	1.18	0.92	1.24	0.67	1.37	1.19	0.49	0.18	0.49	0.29	0	0	9	10	2	2	0	1	2	0	0	1	0	0	3	5	11	3	6	7	4	1	1	1	0	0	Chr01
Glyma.01G039900.Wm82.a2.v1	1.52	0.77	2.3	0	0.66	2.33	1.58	1.46	0	0.58	0	0	1.36	1.9	3.12	1.55	1.97	1.18	1.05	1.21	0	0.5	2.02	1.92	3	2	3	0	1	5	4	6	0	1	0	0	2	6	16	4	5	4	5	4	0	1	8	2	Chr01
Glyma.01G040000.Wm82.a2.v1	38.09	35.53	57.92	45.76	14.68	24.18	18.66	21.46	13.61	9.63	16.55	5.82	24.04	41.8	32.44	14.61	12.53	19.39	22.27	15.71	11.99	10.71	11.29	3.4	64	78	64	55	19	44	40	75	32	14	25	3	30	112	141	32	27	56	90	44	12	18	38	3	Chr01
Glyma.01G040100.Wm82.a2.v1	0	0	0	0	1.23	0	0	0.91	0	1.09	0	0	0	0	0	0	0	0	0	0	0	0	0	0	0	0	0	0	1	0	0	2	0	1	0	0	0	0	0	0	0	0	0	0	0	0	0	0	Chr01
Glyma.01G040200.Wm82.a2.v1	1.53	4.68	1.16	11.77	29.8	71.37	76.76	79.47	73.83	19.45	30.64	17.45	2.06	3.84	1.18	51.06	47.75	89.94	111.04	84.49	51.4	13.01	25.2	32.02	2	8	1	11	30	101	128	216	135	22	36	7	2	8	4	87	80	202	349	184	40	17	66	22	Chr01
Glyma.01G040300.Wm82.a2.v1	7.01	8.69	12.69	12.14	7.37	8.94	4.45	10.11	5.49	4.24	5.57	9.79	13.48	7.54	8.13	12.8	7.29	10.88	9.44	10.02	10.09	9.68	7.83	8.25	21	34	25	26	17	29	17	63	23	11	15	9	30	36	63	50	28	56	68	50	18	29	47	13	Chr01
Glyma.01G040400.Wm82.a2.v1	1.04	2.13	2.11	10.69	2.71	1.93	1.09	1.84	0.75	0.4	0.77	0	2.34	3.05	2.28	2.13	2.44	1.62	1.16	0.63	0.58	1.04	0.52	1.32	3	8	4	22	6	6	4	11	3	1	2	0	5	14	17	8	9	8	8	3	1	3	3	2	Chr01
Glyma.01G040500.Wm82.a2.v1	2.88	5.5	1.46	2.68	4.98	5.31	2.63	4.15	2.74	1.11	1.07	0	2.58	4.51	3.15	5.51	4.49	4.46	1.79	1.73	1.61	0	1.2	0	6	15	2	4	8	12	7	18	8	2	2	0	4	15	17	15	12	16	9	6	2	0	5	0	Chr01
Glyma.01G040600.Wm82.a2.v1	0.51	0.78	1.55	0.71	0	1.88	0.4	0.74	0.73	0.59	0	0	0	0.96	1.38	1.17	0.4	1.19	1.48	0	0.86	0	2.03	1.94	1	2	2	1	0	4	1	3	2	1	0	0	0	3	7	3	1	4	7	0	1	0	8	2	Chr01
Glyma.01G040700.Wm82.a2.v1	20.78	11.45	13.9	0	0	0	0	1.2	0.59	0	0	0	6.71	13.55	19.92	0	0.65	0	0.35	0	0	0	0	0	25	18	11	0	0	0	0	3	1	0	0	0	6	26	62	0	1	0	1	0	0	0	0	0	Chr01
Glyma.01G040900.Wm82.a2.v1	0.32	0.36	0.72	1.99	0.82	0.44	0.74	0.38	0.45	0.73	0.35	0	0.21	0.1	0.43	0.61	0.25	0.09	0.72	0.66	0.8	0	0.55	1.5	2	3	3	9	4	3	6	5	4	4	2	0	1	1	7	5	2	1	11	7	3	0	7	5	Chr01
Glyma.01G041100.Wm82.a2.v1	0	0	7.64	0	2.61	3.71	0	0.48	0	1.16	1.12	0	0	0	0	0	0	0	0	0.6	0	0	0.5	1.91	0	0	5	0	2	4	0	1	0	1	1	0	0	0	0	0	0	0	0	1	0	0	1	1	Chr01
Glyma.01G041200.Wm82.a2.v1	7.5	0.72	21.38	3.93	1.22	0.87	3.67	6.76	1.34	1.08	3.13	0	1.26	0	0	0	1.46	0	2.73	1.12	3.15	1.87	2.34	1.78	8	1	15	3	1	1	5	15	2	1	3	0	1	0	0	0	2	0	7	2	2	2	5	1	Chr01
Glyma.01G041300.Wm82.a2.v1	16.04	17.9	11.69	26.63	35.14	23.45	21.21	19.12	17.67	13.13	7.43	7.62	15.3	16.13	14.34	26.14	29.19	23.14	16.53	15.24	16.83	10.02	13.34	16.52	48	70	23	57	81	76	81	119	74	34	20	7	34	77	111	102	112	119	119	76	30	30	80	26	Chr01
Glyma.01G041400.Wm82.a2.v1	0	0	0	0	0	0	1.02	0.16	0	0	0.36	0	0.88	0.2	0.13	0	0	0	0.27	0	0.55	0.33	0.49	0	0	0	0	0	0	0	4	1	0	0	1	0	2	1	1	0	0	0	2	0	1	1	3	0	Chr01
Glyma.01G041500.Wm82.a2.v1	1.09	1.16	1.65	2.12	1.97	2.2	2.38	2.09	4.34	1.25	0.97	0.71	2.34	1.5	1.68	2.83	1.52	1.89	1.9	1.95	2.92	1.09	1.3	0	5	7	5	7	7	11	14	20	28	5	4	1	8	11	20	17	9	15	21	15	8	5	12	0	Chr01
Glyma.01G041700.Wm82.a2.v1	7.5	6.89	18.24	10.06	4.28	2.49	3.06	2.16	1.71	0.35	1	0.98	8.07	9.03	11.13	1.38	2.34	2.09	2.49	1.98	1.51	2.4	2.1	2.85	25	30	40	24	11	9	13	15	8	1	3	1	20	48	96	6	10	12	20	11	3	8	14	5	Chr01
Glyma.01G042100.Wm82.a2.v1	0	0	0	1.87	0.43	1.55	0	1.29	0	2.32	0.37	1.09	0.45	0	0.13	0	0.26	0.19	0.42	1	0	0	1.17	0	0	0	0	4	1	5	0	8	0	6	1	1	1	0	1	0	1	1	3	5	0	0	7	0	Chr01
Glyma.01G042200.Wm82.a2.v1	0	0	0	0	0	0	0	0	0	0	0	0	0	0	0	1.12	0	0	0	0	0	0	0	0	0	0	0	0	0	0	0	0	0	0	0	0	0	0	0	2	0	0	0	0	0	0	0	0	Chr01
Glyma.01G042300.Wm82.a2.v1	6.43	8.69	5.75	7.94	9.34	3.84	3.26	4.55	4.06	2.62	1.68	3.7	7.64	5.22	7.46	5.52	7.38	3.96	5.82	3.63	1.27	3.41	1.89	5.76	17	30	10	15	19	11	11	25	15	6	4	3	15	22	51	19	25	18	37	16	2	9	10	8	Chr01
Glyma.01G042400.Wm82.a2.v1	5.46	5.57	5.53	9.75	8.66	7.28	5.47	7.14	4.33	2.8	4.05	3.95	7.76	6.66	5.86	8.84	9.93	5.82	4.67	5.28	3.56	3.64	4.09	5.19	18	24	12	23	22	26	23	49	20	8	12	4	19	35	50	38	42	33	37	29	7	12	27	9	Chr01
Glyma.01G042600.Wm82.a2.v1	0.64	0	0	2.68	0	1.18	2.01	2.77	0.46	1.48	0	0	0	0.4	0	1.96	2	0.37	0.27	0	2.15	0	0	0	1	0	0	3	0	2	4	9	1	2	0	0	0	1	0	4	4	1	1	0	2	0	0	0	Chr01
Glyma.01G042800.Wm82.a2.v1	15.95	18.16	17.16	25.02	14.65	16.89	8.23	14.59	12.24	5.4	12.12	13.94	18.33	14.15	14.74	14.03	18.21	18.34	11	9.11	8.49	8.56	8.54	11.84	41	61	29	46	29	47	27	78	44	12	28	11	35	58	98	47	60	81	68	39	13	22	44	16	Chr01
Glyma.01G043000.Wm82.a2.v1	2.22	2.12	4.22	0	3.6	2.56	0.87	1.6	0.79	1.92	0	0	2.99	2.43	3.43	0.43	2.16	2.9	3.23	1.33	0	0	0.83	0	4	5	5	0	5	5	2	6	2	3	0	0	4	7	16	1	5	9	14	4	0	0	3	0	Chr01
Glyma.01G043400.Wm82.a2.v1	0	0	0	5.67	7.18	6.13	38.17	6.92	18.46	50.31	51.71	39.67	1.49	0.93	1.28	2.55	1.44	9.66	11.81	22.8	19.2	27.67	33.33	29.47	0	0	0	11	15	18	132	39	70	118	126	33	3	4	9	9	5	45	77	103	31	75	181	42	Chr01
Glyma.01G043600.Wm82.a2.v1	1.12	0	1.71	1.57	1.46	2.59	2.64	1.35	0.8	0	0.63	1.83	2.27	0.35	1.74	1.29	2.19	0.98	0.7	2.36	1.89	1.69	1.4	3.21	2	0	2	2	2	5	6	5	2	0	1	1	3	1	8	3	5	3	3	7	2	3	5	3	Chr01
Glyma.01G043700.Wm82.a2.v1	0.58	0.67	0.44	0	0	0	0	0	0	0	0	0	0.79	1.46	0.68	0	0	0	0	0	0	0	0	0	2	3	1	0	0	0	0	0	0	0	0	0	2	8	6	0	0	0	0	0	0	0	0	0	Chr01
Glyma.01G043800.Wm82.a2.v1	5.62	3.62	0.9	2.48	3.45	4.09	2.55	5.68	2.96	3.42	0.99	3.85	4.77	3.89	3.43	3.85	4.84	6.71	4.79	3.9	3.47	1.48	2.65	2.25	19	16	2	6	9	15	11	40	14	10	3	4	12	21	30	17	21	39	39	22	7	5	18	4	Chr01
Glyma.01G044000.Wm82.a2.v1	72.23	66.74	69.42	76.21	84.04	112.63	85.44	112.36	93.02	56.69	56.85	51.06	42.19	47	62.95	102.43	82.38	102.29	96.89	65.42	90.38	48.37	58.49	58.31	106	128	67	80	95	179	160	343	191	72	75	23	46	110	239	196	155	258	342	160	79	71	172	45	Chr01
Glyma.01G044100.Wm82.a2.v1	1.33	3.57	3.04	2.79	2.16	3.38	3.13	2.72	1.67	2.69	0.74	1.08	4.03	2.51	3.09	2.04	1.3	2.13	1.38	1.2	0	1.66	1.99	5.07	4	14	6	6	5	11	12	17	7	7	2	1	9	12	24	8	5	11	10	6	0	5	12	8	Chr01
Glyma.01G044200.Wm82.a2.v1	8.99	7.24	4.32	7.28	6.76	3.93	10.01	9.33	7.78	8.75	6.32	15.41	3.18	5.04	10.61	2.18	5.17	3.85	5.51	5.11	3.18	4.73	4.72	2.7	19	20	6	11	11	9	27	41	23	16	12	10	5	17	58	6	14	14	28	18	4	10	20	3	Chr01
Glyma.01G044300.Wm82.a2.v1	2.85	2.35	1.33	1.84	2.85	0.41	0.69	0.84	0.31	0.51	0	0	1.77	2.61	1.95	2.52	3.25	1.15	0.73	0.13	0.74	0	0.22	0	13	14	4	6	10	2	4	8	2	2	0	0	6	19	23	15	19	9	8	1	2	0	2	0	Chr01
Glyma.01G044500.Wm82.a2.v1	1.28	1.96	0.97	0.89	2.49	0	0	0	0	0	0	0	0	3.61	1.73	0	0.5	0	0	0	0	0	0	0	2	4	1	1	3	0	0	0	0	0	0	0	0	9	7	0	1	0	0	0	0	0	0	0	Chr01
Glyma.01G044600.Wm82.a2.v1	5	8.29	6.97	1.17	4.87	2.31	2.94	4.21	2.38	3.85	0.93	2.72	7.29	15.16	6.93	2.56	1.63	3.39	4.33	4.25	2.1	0.42	1.04	0.79	12	26	11	2	9	6	9	21	8	8	2	2	13	58	43	8	5	14	25	17	3	1	5	1	Chr01
Glyma.01G044800.Wm82.a2.v1	0	0	0	0.92	0	1.83	0.52	0.32	0.94	0.76	0	2.15	1.78	0.83	0.25	1.01	0	1.92	1.1	0.79	0	0	0.33	1.25	0	0	0	1	0	3	1	1	2	1	0	1	2	2	1	2	0	5	4	2	0	0	1	1	Chr01
Glyma.01G044900.Wm82.a2.v1	0.27	0.41	0.4	0.37	0	0.25	0.21	0.51	0.38	0	0.59	0.86	0.36	1	0.51	0.41	0.41	0.62	0.66	0.64	0.45	0.27	0.26	0	1	2	1	1	0	1	1	4	2	0	2	1	1	6	5	2	2	4	6	4	1	1	2	0	Chr01
Glyma.01G045100.Wm82.a2.v1	6.03	3.93	6.8	4.69	2.32	3.3	2.1	4.51	2.56	1.29	2.49	0.73	6.02	5.89	6.74	4.63	3.83	3.9	3.44	2.82	5.63	1.56	3.01	2.97	27	23	20	15	8	16	12	42	16	5	10	1	20	42	78	27	22	30	37	21	15	7	27	7	Chr01
Glyma.01G045200.Wm82.a2.v1	6.1	9.33	21.64	1.89	0	0	0	0.98	1.45	0.78	0	0	5.47	5.1	4.98	0	0	0.39	0.28	0	0	0	0.34	0	9	18	21	2	0	0	0	3	3	1	0	0	6	12	19	0	0	1	1	0	0	0	1	0	Chr01
Glyma.01G045300.Wm82.a2.v1	3.7	4.4	6.25	10.34	10.14	6.45	3.54	5.93	4.99	3.8	3.66	5.35	2.77	2.32	1.27	4.41	4.81	5.98	2.39	3.7	3.45	0.82	1.85	4.69	9	14	10	18	19	17	11	30	17	8	8	4	5	9	8	14	15	25	14	15	5	2	9	6	Chr01
Glyma.01G045400.Wm82.a2.v1	10.66	11.33	0.9	10.76	10.77	3.28	1.86	2.56	0.85	0	0	0	13.55	18.2	13.97	4.09	6.01	4.48	0.99	0.36	0	0	0.3	0	18	25	1	13	14	6	4	9	2	0	0	0	17	49	61	9	13	13	4	1	0	0	1	0	Chr01
Glyma.01G045500.Wm82.a2.v1	1.94	4.82	0.74	0	1.26	0.45	0	1.16	0	0	0	0	0.65	4.25	2.06	1.49	1.13	0.28	0.4	0	0	0	0	0	4	13	1	0	2	1	0	5	0	0	0	0	1	14	11	4	3	1	2	0	0	0	0	0	Chr01
Glyma.01G045700.Wm82.a2.v1	6.56	6.1	7.84	11.14	4.26	6.5	4.04	5.41	3.35	4.34	4.17	3.06	5.68	4.7	4.71	4.68	4.02	3.55	4.48	4.5	3.94	0.94	2.57	0	14	17	11	17	7	15	11	24	10	8	8	2	9	16	26	13	11	13	23	16	5	2	11	0	Chr01
Glyma.01G045800.Wm82.a2.v1	6.79	7.28	3.61	7.6	3.09	4.08	2.4	4.08	1.94	1.18	1.89	0	7.31	4.26	6.3	3.13	3.97	5.14	3.11	2.65	1.71	1.7	0.68	0.65	20	28	7	16	7	13	9	25	8	3	5	0	16	20	48	12	15	26	22	13	3	5	4	1	Chr01
Glyma.01G045900.Wm82.a2.v1	0	1	0	0	0	0	0	0.31	0	0.75	0	0	1.75	0.41	0.25	0.5	0.51	0	0	0	0	0	0	0	0	2	0	0	0	0	0	1	0	1	0	0	2	1	1	1	1	0	0	0	0	0	0	0	Chr01
Glyma.01G046000.Wm82.a2.v1	3.83	4.24	2.91	5.36	5.81	4.72	3	4.61	2.89	0.74	1.66	0.69	5.16	5.47	4.36	5.72	7.47	4.34	3.19	3.32	1.07	1.06	1.49	2.43	18	26	9	18	21	24	18	45	19	3	7	1	18	41	53	35	45	35	36	26	3	5	14	6	Chr01
Glyma.01G046100.Wm82.a2.v1	0	0	0	0	0	0	0	0.22	0.65	0	0	0	0	0	0	0	0	0.26	0	0.27	0	0	0	0	0	0	0	0	0	0	0	1	2	0	0	0	0	0	0	0	0	1	0	1	0	0	0	0	Chr01
Glyma.01G046200.Wm82.a2.v1	19.82	22.06	41.09	37.78	48.34	49.36	50.83	38.11	45.92	29.84	20.04	43.04	22.64	16.95	21.82	70.01	62.3	43.33	39.45	41.8	53.44	21.61	33.57	33.12	33	48	45	45	62	89	108	132	107	43	30	22	28	45	94	152	133	124	158	116	53	36	112	29	Chr01
Glyma.01G046400.Wm82.a2.v1	5.21	7.97	2.26	12.49	25.12	17.18	1.75	7.16	1.6	4.3	3.31	12.12	0	0.93	1.73	4.57	5.81	3.03	0.93	1.34	0	0	0.74	0	7	14	2	12	26	25	3	20	3	5	4	5	0	2	6	8	10	7	3	3	0	0	2	0	Chr01
Glyma.01G046500.Wm82.a2.v1	3.51	5.97	5.93	5.45	4.56	5.04	5.19	5.44	4.18	2.7	5.2	7.62	3.67	5.38	4.52	5.98	5.17	5.67	5.67	4.91	2.62	6.63	3.89	2.22	9	20	10	10	9	14	17	29	15	6	12	6	7	22	30	20	17	25	35	21	4	17	20	3	Chr01
Glyma.01G046600.Wm82.a2.v1	0.28	0	0.85	1.56	2.18	0	0.66	0.81	1	0	0	0	0	0.88	0.76	1.29	1.74	1.3	1.86	0.34	2.34	0	0.14	0	1	0	2	4	6	0	3	6	5	0	0	0	0	5	7	6	8	8	16	2	5	0	1	0	Chr01
Glyma.01G046700.Wm82.a2.v1	18.08	8.88	6.15	10.18	8.06	8.47	6.55	8.17	7.91	2.81	3.3	2.64	18.89	16.07	17.42	7.86	6.73	8.16	7.74	6.48	5.89	4.05	4.58	9.75	67	43	15	27	23	34	31	63	41	9	11	3	52	95	167	38	32	52	69	40	13	15	34	19	Chr01
Glyma.01G046800.Wm82.a2.v1	0	0	0	0	0	0	0	0	0	0	0	0	0	0	0	0	0.32	0	0	0	0	0	0	0	0	0	0	0	0	0	0	0	0	0	0	0	0	0	0	0	1	0	0	0	0	0	0	0	Chr01
Glyma.01G047000.Wm82.a2.v1	208.75	217.25	259.56	311.28	340.86	406.95	372.24	363.52	355.41	290.54	240.45	278.07	279.76	280.98	269.67	514.47	503.66	511.75	533.49	434.24	506.28	394.22	424.09	322.87	225	306	184	240	283	475	512	815	536	271	233	92	224	483	752	723	696	948	1383	780	325	425	916	183	Chr01
Glyma.01G047100.Wm82.a2.v1	10.69	7.48	19.05	20.93	18.25	9.31	7.9	12.04	9.39	5.3	7.14	6.97	10.28	10.54	13.7	10.78	7.86	13.33	7.49	3.67	7.18	7.64	5.95	9.88	35	32	41	49	46	33	33	82	43	15	21	7	25	55	116	46	33	75	59	20	14	25	39	17	Chr01
Glyma.01G047700.Wm82.a2.v1	24.65	23.25	25.28	34.46	37.96	33.88	12.58	27.01	14.34	7.29	7.65	14.94	33.96	28.4	23.27	25.06	29.07	18.68	17.16	15.14	17.33	12.61	7.44	14.17	43	53	29	43	51	64	28	98	35	11	12	8	44	79	105	57	65	56	72	44	18	22	26	13	Chr01
Glyma.01G047800.Wm82.a2.v1	0.89	0	0	0	0	0	0	0.85	0	0	0	0	1.2	0.56	2.75	0	0	0	0.37	0	2.98	0.89	0	0	1	0	0	0	0	0	0	2	0	0	0	0	1	1	8	0	0	0	1	0	2	1	0	0	Chr01
Glyma.01G047900.Wm82.a2.v1	0	0	0	1.23	1.14	0	2.4	1.48	0.63	0	0.98	0	0	0.27	0.34	0.34	0.34	1.53	1.82	0.79	1.47	2.63	1.31	2.5	0	0	0	2	2	0	7	7	2	0	2	0	0	1	2	1	1	6	10	3	2	6	6	3	Chr01
Glyma.01G048000.Wm82.a2.v1	1.53	1.3	3.35	1.42	0.44	0.63	2.26	2.04	1.21	2.94	0.94	2.76	1.83	2.13	1.97	1.04	0.93	1.18	1.2	2.14	1.42	1.36	1.35	3.23	9	10	13	6	2	4	17	25	10	15	5	5	8	20	30	8	7	12	17	21	5	8	16	10	Chr01
Glyma.01G048100.Wm82.a2.v1	0	1.05	0	1.43	0	1.26	0.54	1.48	0.49	0	1.14	0	2.3	0.43	1.45	0	1.6	1.79	0.28	0.82	0.57	0	0.34	0	0	4	0	3	0	4	2	9	2	0	3	0	5	2	11	0	6	9	2	4	1	0	2	0	Chr01
Glyma.01G048300.Wm82.a2.v1	0	0	0	0	0.55	0	0	0	0	0	0	0	0	0	0	0	0	0	0	0	0	0	0	0	0	0	0	0	1	0	0	0	0	0	0	0	0	0	0	0	0	0	0	0	0	0	0	0	Chr01
Glyma.01G048400.Wm82.a2.v1	0.69	1.05	0	0	0	0	1.07	0.33	0	0	0	0	0.92	0.43	0.27	0	0	0	0	0	0	0	0	0	1	2	0	0	0	0	2	1	0	0	0	0	1	1	1	0	0	0	0	0	0	0	0	0	Chr01
Glyma.01G048500.Wm82.a2.v1	1.07	2.79	1.31	2.4	5.85	1.39	2.52	1.55	2.91	0.99	2.15	2.1	2.02	1.61	2.16	2.63	1	2.5	1.78	2.32	0.36	1.29	2.25	3.26	5	17	4	8	21	7	15	15	19	4	9	3	7	12	26	16	6	20	20	18	1	6	21	8	Chr01
Glyma.01G048600.Wm82.a2.v1	0.73	2.22	6.62	0	1.88	2.01	2.84	1.39	2.07	1.68	3.23	4.72	1.95	0	0.84	1.67	0	1.69	0.6	0.87	1.22	1.45	0	0	1	4	6	0	2	3	5	4	4	2	4	2	2	0	3	3	0	4	2	2	1	2	0	0	Chr01
Glyma.01G048800.Wm82.a2.v1	0	0	0	0	0	0	0.29	0	0	0	0	0	0.99	1.85	0.14	0.28	0	0.21	0.31	0.66	0	0.37	0.18	0	0	0	0	0	0	0	1	0	0	0	0	0	2	8	1	1	0	1	2	3	0	1	1	0	Chr01
Glyma.01G049100.Wm82.a2.v1	2.96	2.91	8.99	4.73	9.87	6.63	2.65	4.67	5.44	1.46	2.82	2.75	2.27	7.15	6.7	4.86	2.97	3.93	4.04	4.82	4.97	5.49	2.32	3.21	7	9	14	8	18	17	8	23	18	3	6	2	4	27	41	15	9	16	23	19	7	13	11	4	Chr01
Glyma.01G049400.Wm82.a2.v1	0	0	0.51	0	0	0	0	0	0	0.78	0	0	0.45	0.21	0.13	0.78	0	0.59	0.42	0.2	0	1.01	0.17	0	0	0	1	0	0	0	0	0	0	2	0	0	1	1	1	3	0	3	3	1	0	3	1	0	Chr01
Glyma.01G049600.Wm82.a2.v1	0	0	0.58	0	0	0	0	0	0	0	0	0	0	0	0	0	0	0	0	0	0	0	0	0	0	0	1	0	0	0	0	0	0	0	0	0	0	0	0	0	0	0	0	0	0	0	0	0	Chr01
Glyma.01G050100.Wm82.a2.v1	46.29	47.13	32.44	19.7	31.88	36.06	4.73	11.03	4.03	1.86	3.13	1.31	47.15	66.89	67.06	24.08	40.82	22.02	12.39	4.59	7.44	3.22	6.43	6.12	115	153	53	35	61	97	15	57	14	4	7	1	87	265	431	78	130	94	74	19	11	8	32	8	Chr01
Glyma.01G050400.Wm82.a2.v1	5.49	4.46	2.61	6.24	4.45	4.12	1.08	3.3	1.23	0	0.38	0	4.16	3.23	5.3	2.63	9.37	2.79	2.28	1.85	3.46	0.34	0.51	1.3	16	17	5	13	10	13	4	20	5	0	1	0	9	15	40	10	35	14	16	9	6	1	3	2	Chr01
Glyma.01G050500.Wm82.a2.v1	29.74	26.46	8.41	29.01	19.75	15.33	12.47	26.6	12.36	6.39	6.15	4.51	22.35	21.25	30.75	27.06	38.3	28.57	17.83	14.53	15.1	9.68	11.05	9.21	43	50	8	30	22	24	23	80	25	8	8	2	24	49	115	51	71	71	62	35	13	14	32	7	Chr01
Glyma.01G050900.Wm82.a2.v1	18.03	13.2	27.42	4.38	2.04	7.96	3.07	8.29	7.28	5.44	6.1	2.55	24.28	12.78	21.21	0.6	0	0.91	4.89	2.82	5.27	1.57	0.78	1.49	23	22	23	4	2	11	5	22	13	6	7	1	23	26	70	1	0	2	15	6	4	2	2	1	Chr01
Glyma.01G051300.Wm82.a2.v1	0	0	1.7	20.35	0	0	0	0	0	0	0	0	0	0	0.22	0	0	0	0	0	0	0	0	0	0	0	2	26	0	0	0	0	0	0	0	0	0	0	1	0	0	0	0	0	0	0	0	0	Chr01
Glyma.01G051400.Wm82.a2.v1	7.79	4.44	5.8	8.97	7.14	8.88	5.03	7.05	3.16	1.76	3.74	3.48	3.29	5.94	2.89	5.62	5.36	7.2	5.14	5.5	3.33	2.44	2.36	2.9	51	38	25	42	36	63	42	96	29	10	22	7	16	62	49	48	45	81	81	60	13	16	31	10	Chr01
Glyma.01G051700.Wm82.a2.v1	0.57	0	0	0	0	0	0	0	0	0	0	0	0	1.79	0	0.44	0	0	0.24	0	0	0	0	0	1	0	0	0	0	0	0	0	0	0	0	0	0	5	0	1	0	0	1	0	0	0	0	0	Chr01
Glyma.01G051800.Wm82.a2.v1	0	0	0	0	1.96	0	0.59	0.36	0	0	0.84	0	0	0	0	0.58	0	0	0	0	0	0	0.38	0	0	0	0	0	2	0	1	1	0	0	1	0	0	0	0	1	0	0	0	0	0	0	1	0	Chr01
Glyma.01G052200.Wm82.a2.v1	14.27	14.15	7.23	11.08	21.26	13.66	8.69	8.13	11.71	9.16	3.53	13.77	17.78	14.25	13.48	19.86	18.13	19.37	12.52	11.41	17.74	9.51	8.44	5.02	27	35	9	15	31	28	21	32	31	15	6	8	25	43	66	49	44	63	57	36	20	18	32	5	Chr01
Glyma.01G052300.Wm82.a2.v1	0.11	0.51	0	0.31	0.29	0	0.18	0.16	0.24	0	0	0	0.15	0.07	0.26	0.26	0.09	0.2	0	0.13	0	0	0.11	0.21	1	6	0	2	2	0	2	3	3	0	0	0	1	1	6	3	1	3	0	2	0	0	2	1	Chr01
Glyma.01G052400.Wm82.a2.v1	10.24	13.71	10.7	19.68	15.78	17.13	10.03	16	16.46	11.83	4.98	8.34	12.92	7.62	7.91	9.32	9.98	7.82	7.98	5.76	3.22	4.48	4.47	2.43	16	28	11	22	19	29	20	52	36	16	7	4	15	19	32	19	20	21	30	15	3	7	14	2	Chr01
Glyma.01G052500.Wm82.a2.v1	1.55	1.58	1.18	0.72	2.01	1.67	0	1.62	0.37	0.6	0.29	0	2.44	2.11	1.9	1.39	1.81	1.2	1.72	0.78	0.87	0.26	0.39	0	6	8	3	2	6	7	0	13	2	2	1	0	7	13	19	7	9	8	16	5	2	1	3	0	Chr01
Glyma.01G052600.Wm82.a2.v1	2.65	1.16	7.49	1.06	1.48	2.8	0	1.82	1.63	0.88	0.84	0	2.55	3.57	2.49	1.16	0.89	0.44	1.26	1.36	1.27	1.14	0.38	0	7	4	13	2	3	8	0	10	6	2	2	0	5	15	17	4	3	2	8	6	2	3	2	0	Chr01
Glyma.01G052700.Wm82.a2.v1	0.59	0.45	0	2.49	0	1.1	0.47	1.14	0	0	0	0	0	1.12	1.15	0.46	0	0.35	0.99	1.07	1	0	0.89	1.13	1	1	0	3	0	2	1	4	0	0	0	0	0	3	5	1	0	1	4	3	1	0	3	1	Chr01
Glyma.01G052800.Wm82.a2.v1	5.19	3.97	6.91	11.79	4.21	8.99	8.14	8.73	5.56	5.25	7.22	2.11	6.11	8.54	8.78	10.95	11.64	9.06	6.21	9.34	6.54	5.19	4.86	4.94	8	8	7	13	5	15	16	28	12	7	10	1	7	21	35	22	23	24	23	24	6	8	15	4	Chr01
Glyma.01G053100.Wm82.a2.v1	1.78	1.82	0.6	0	1.54	1.46	1.55	0.38	0.28	0	0.44	0	3.2	1.74	0.92	0.15	1.24	0.35	0.82	0.48	0	0.2	0.4	0	9	12	2	0	6	8	10	4	2	0	2	0	12	14	12	1	8	3	10	4	0	1	4	0	Chr01
Glyma.01G053200.Wm82.a2.v1	12.22	13.44	6.97	27.76	13.88	14.1	8.98	17.99	9.82	7.94	1.7	7.46	10.28	8.62	8.26	14.64	7.74	10.22	8.57	7.79	23.08	9.93	8.76	5.81	16	23	6	26	14	20	15	49	18	9	2	3	10	18	28	25	13	23	27	17	18	13	23	4	Chr01
Glyma.01G053300.Wm82.a2.v1	6.56	7.33	2.3	9.17	14.41	8.85	7.31	10.18	11.17	6.12	6.17	5.75	6.11	5.53	6.14	14.31	9.25	7.34	11.11	9.53	8.47	4.54	6.04	6.23	26	38	6	26	44	38	37	84	62	21	22	7	18	35	63	74	47	50	106	63	20	18	48	13	Chr01
Glyma.01G053400.Wm82.a2.v1	2.08	2.65	1.05	1.94	0.9	0.64	1.09	2	1.98	2.4	0	2.26	0	0.43	1.07	1.06	0.54	0.4	2.02	2.08	1.16	1.39	0.69	0	3	5	1	2	1	1	2	6	4	3	0	1	0	1	4	2	1	1	7	5	1	2	2	0	Chr01
Glyma.01G053600.Wm82.a2.v1	0	0	0	0	0	0.3	0.25	0.47	0.46	0.37	0	0	0	0	0.12	0.49	0	0	0	0.39	0	0	0.32	0.61	0	0	0	0	0	1	1	3	2	1	0	0	0	0	1	2	0	0	0	2	0	0	2	1	Chr01
Glyma.01G053700.Wm82.a2.v1	1.88	3.24	1.43	5.92	3.67	6.52	1.11	3.39	2.35	0.54	2.09	0	2.53	4.43	2.18	2.89	4.41	1.64	4.11	2.82	0.79	1.88	1.17	3.58	4	9	2	9	6	15	3	15	7	1	4	0	4	15	12	8	12	6	21	10	1	4	5	4	Chr01
Glyma.01G053800.Wm82.a2.v1	1.09	1.11	3.32	0.51	0	0	0	0.35	0.26	0	0.4	0	0.49	0.68	0.7	0.28	0.28	0	0.15	0.87	0	0	0	0	3	4	6	1	0	0	0	2	1	0	1	0	1	3	5	1	1	0	1	4	0	0	0	0	Chr01
Glyma.01G054000.Wm82.a2.v1	14.55	9.35	6.19	33.36	6.04	13.44	8.21	13.43	4.99	8.07	9.06	7.58	12.53	13.87	11.25	16.52	12.26	19.3	15.73	12.22	11.73	7.56	12.78	7.75	25	21	7	41	8	25	18	48	12	12	14	4	16	38	50	37	27	57	65	35	12	13	44	7	Chr01
Glyma.01G054100.Wm82.a2.v1	2.52	1.16	1.53	3.52	1.31	2.33	0	1.94	0.72	0	0	0	0.68	3.16	0.39	0.39	2.36	0.88	0.21	0.3	0	0	0	0	5	3	2	5	2	5	0	8	2	0	0	0	1	10	2	1	6	3	1	1	0	0	0	0	Chr01
Glyma.01G054200.Wm82.a2.v1	8.01	11.82	9.57	8.8	9.65	9.51	8.52	9.9	6.13	11.24	4.45	3.73	4.62	9.33	8.84	14.48	13.38	12.98	10.94	6.18	3.84	5.15	9.7	3.26	14	27	11	11	13	18	19	36	15	17	7	2	6	26	40	33	30	39	46	18	4	9	34	3	Chr01
Glyma.01G054300.Wm82.a2.v1	1.69	2.27	2.57	0	1.1	0.78	0.33	1.02	0.6	0	0	1.38	1.71	2.39	2.13	0.65	0.33	0.74	0.35	0.76	0	0	0.21	1.61	4	7	4	0	2	2	1	5	2	0	0	1	3	9	13	2	1	3	2	3	0	0	1	2	Chr01
Glyma.01G054400.Wm82.a2.v1	42.76	32.2	12.58	17.36	23.28	21.66	15.13	18.57	18.24	10.36	13.81	22.47	51.07	40.65	51.19	20.63	16.14	24.08	15.77	17.8	15.06	12.41	15.49	6.56	62	61	12	18	26	34	28	56	37	13	18	10	55	94	192	39	30	60	55	43	13	18	45	5	Chr01
Glyma.01G054500.Wm82.a2.v1	0.37	0.42	0.84	0.26	2.14	2.71	1.29	2.82	1.83	1.06	0.61	1.19	0.25	0.92	0.14	1.69	1	1.81	1.14	2.53	1.23	0.55	1.19	1.05	2	3	3	1	9	16	9	32	14	5	3	2	1	8	2	12	7	17	15	23	4	3	13	3	Chr01
Glyma.01G054600.Wm82.a2.v1	0	0	0	0	0	0	0.75	0.92	2.05	1.11	0	0	0	0	0	0	0	0	1.2	1.15	0	0	0	0	0	0	0	0	0	0	1	2	3	1	0	0	0	0	0	0	0	0	3	2	0	0	0	0	Chr01
Glyma.01G054800.Wm82.a2.v1	3.35	1.19	3.39	3.74	2.61	2.27	5.07	3.65	3.51	4.12	0.99	2.18	1.8	2.24	2.59	1.88	2.26	2.08	2.5	3.35	3	4.24	1.78	2.97	15	7	10	12	9	11	29	34	22	16	4	3	6	16	30	11	13	16	27	25	8	19	16	7	Chr01
Glyma.01G055200.Wm82.a2.v1	0	0	0.98	0	0	0	0	0.31	0	0	0	0	0	0.41	0	0	0	0.38	0	0	0	0	0	0	0	0	1	0	0	0	0	1	0	0	0	0	0	1	0	0	0	1	0	0	0	0	0	0	Chr01
Glyma.01G055300.Wm82.a2.v1	3.19	3.42	2.42	7.58	5.38	5.89	1.5	3.22	1.14	0.74	1.42	0	6.44	6.4	4.44	2.45	3.48	3.34	4.24	1.72	1.07	1.91	0.95	1.21	10	14	5	17	13	20	6	21	5	2	4	0	15	32	36	10	14	18	32	9	2	6	6	2	Chr01
Glyma.01G055400.Wm82.a2.v1	18.26	22.87	42.92	6.96	7.9	9.71	20.38	10.64	12.26	7.67	8.62	7.21	27.57	28.46	30.59	16.13	7.77	23.83	22.78	11.29	16.73	5.53	9.94	20	33	54	51	9	11	19	47	40	31	12	14	4	37	82	143	38	18	74	99	34	18	10	36	19	Chr01
Glyma.01G055500.Wm82.a2.v1	5.28	4.71	4.68	7.38	13.7	10.15	4.13	7.82	9.43	8.64	5.87	2.86	5.33	7.44	8.5	7.76	12.35	12.02	7.86	6.86	5.17	4.84	7.46	5.02	12	14	7	12	24	25	12	37	30	17	12	2	9	27	50	23	36	47	43	26	7	11	34	6	Chr01
Glyma.01G055700.Wm82.a2.v1	0.37	0	0	0	0.48	0	0	0	0	0.43	0	0	0	0	0	0	0	0	0	0.22	0	0	0	0	1	0	0	0	1	0	0	0	0	1	0	0	0	0	0	0	0	0	0	1	0	0	0	0	Chr01
Glyma.01G055900.Wm82.a2.v1	4.1	3.14	9.01	3.82	3.55	3.79	3.21	5.04	3.58	1.05	3.55	1.48	7.36	4.29	5.81	5.59	6.4	3.45	1.9	2.46	0.77	0	2.96	1.73	9	9	13	6	6	9	9	23	11	2	7	1	12	15	33	16	18	13	10	9	1	0	13	2	Chr01
Glyma.01G056000.Wm82.a2.v1	0	0.32	2.57	0.59	0	1.17	0.33	0	0	0	0	0	1.14	0.79	1.47	1.62	0.66	1.47	1.4	0.51	0	0.42	0.21	0	0	1	4	1	0	3	1	0	0	0	0	0	2	3	9	5	2	6	8	2	0	1	1	0	Chr01
Glyma.01G056100.Wm82.a2.v1	1.69	0.65	0	17.76	32.44	85.64	33.52	70.85	55.69	23.49	20.25	15.18	2.85	2.66	2.46	102.31	86.54	76.87	59.86	47.52	40.53	19.9	30.85	24.96	4	2	0	30	59	219	101	348	184	48	43	11	5	10	15	315	262	312	340	187	57	47	146	31	Chr01
Glyma.01G056300.Wm82.a2.v1	14.87	16.55	17.81	10.08	12.87	8.74	6.71	13.21	7.41	2.6	2	0	18.19	17.51	24.03	7.95	5.62	12.32	7.49	3.51	7.56	2.25	2.92	2.57	33	48	26	16	22	21	19	61	23	5	4	0	30	62	138	23	16	47	40	13	10	5	13	3	Chr01
Glyma.01G056400.Wm82.a2.v1	1.3	0.33	0	0.6	0.56	0.8	0.34	1.04	0.93	0.5	0	0	0.58	0.27	0.67	1.99	0.68	1.01	0.9	0.52	0.73	0	0.22	0.82	3	1	0	1	1	2	1	5	3	1	0	0	1	1	4	6	2	4	5	2	1	0	1	1	Chr01
Glyma.01G056500.Wm82.a2.v1	0	0	0	0	0	0	0	0	0	0	0	0	0	0	0	0	0.45	0	0.24	0	0	0	0	0	0	0	0	0	0	0	0	0	0	0	0	0	0	0	0	0	1	0	1	0	0	0	0	0	Chr01
Glyma.01G056800.Wm82.a2.v1	3.55	1.48	0.98	0.45	0.84	0.6	0	0	0	0	0.36	0	1.3	3.44	4.11	0.25	0.25	0	0.13	0	0	0.32	0	0	11	6	2	1	2	2	0	0	0	0	1	0	3	17	33	1	1	0	1	0	0	1	0	0	Chr01
Glyma.01G056900.Wm82.a2.v1	0.89	0.23	0	2.08	2.71	2.2	0.47	2	0.21	0.69	0.33	2.91	1.6	0.93	0.35	2.28	3.25	2.08	0.87	2.68	0.5	0	0.15	0.57	3	1	0	5	7	8	2	14	1	2	1	3	4	5	3	10	14	12	7	15	1	0	1	1	Chr01
Glyma.01G057100.Wm82.a2.v1	81.07	50.39	38.22	39.1	28.49	36.94	22.75	34.89	14.93	9.41	10.63	8.07	78.63	118.76	155.17	27.42	31.2	32.55	24.88	22.31	24.37	9.2	11.84	11.44	229	186	71	79	62	113	82	205	59	23	27	7	165	535	1134	101	113	158	169	105	41	26	67	17	Chr01
Glyma.01G057400.Wm82.a2.v1	12.73	10.71	12.25	20.16	17.07	17.63	10.64	10.4	12.13	10.29	6.61	12.44	12.56	8.51	12.46	15.62	15.88	14.81	10.94	13.75	13.53	10.18	8.26	12.1	30	33	19	34	31	45	32	51	40	21	14	9	22	32	76	48	48	60	62	54	19	24	39	15	Chr01
Glyma.01G057600.Wm82.a2.v1	0.75	0.86	0.57	1.05	0.49	0.35	0	0.36	0.8	0	0	0	1.01	0	0.87	2.3	0.88	1.09	0.47	0.67	0	0	0.19	0	2	3	1	2	1	1	0	2	3	0	0	0	2	0	6	8	3	5	3	3	0	0	1	0	Chr01
Glyma.01G057700.Wm82.a2.v1	1.44	0.73	0	0	0	1.33	0.38	1.85	1.03	1.11	0	1.56	0	0	0.56	0.74	0.75	0.56	1.8	0.86	0.81	0.48	0.48	0	3	2	0	0	0	3	1	8	3	2	0	1	0	0	3	2	2	2	9	3	1	1	2	0	Chr01
Glyma.01G058000.Wm82.a2.v1	27.02	33.08	10.68	43.82	35.08	51.4	14.82	36.89	18.92	8.74	10.22	7.04	24.01	34.9	30.5	31.09	42.57	36.16	20	25.29	14.52	8.64	12.67	9.25	50	80	13	58	50	103	35	142	49	14	17	4	33	103	146	75	101	115	89	78	16	16	47	9	Chr01
Glyma.01G058200.Wm82.a2.v1	1.87	1.15	2.85	3.67	2.92	2.08	0.88	2.34	0.54	0.43	0.42	0	1.51	2.82	2.46	2.59	2.05	2.84	1.09	1.57	0.63	0.75	0.19	0.71	5	4	5	7	6	6	3	13	2	1	1	0	3	12	17	9	7	13	7	7	1	2	1	1	Chr01
Glyma.01G058300.Wm82.a2.v1	21.26	21.28	21.55	13.72	14.16	15.61	26.49	25.16	20.26	35.28	38.81	30.2	19.82	23.25	27.19	14.22	8.51	20.3	21.54	21.27	25.63	27.8	29.38	38.36	39	51	26	18	20	31	62	96	52	56	64	17	27	68	129	34	20	64	95	65	28	51	108	37	Chr01
Glyma.01G058400.Wm82.a2.v1	0	1.15	0.57	2.11	0.49	3.13	2.07	3.81	3.5	3.49	4.19	2.46	0	0.24	0	3.47	5	3.95	3.76	2.49	2.53	1.13	1.51	4.3	0	4	1	4	1	9	7	21	13	8	10	2	0	1	0	12	17	18	24	11	4	3	8	6	Chr01
Glyma.01G058500.Wm82.a2.v1	9.86	11.43	16.36	2.51	0.78	0.55	0.47	1.87	1.07	0.69	0.33	0.97	9.65	20.98	17.21	0.92	1.86	1.91	1.74	0.9	0.5	1.79	1.19	1.7	33	50	36	6	2	2	2	13	5	2	1	1	24	112	149	4	8	11	14	5	1	6	8	3	Chr01
Glyma.01G058600.Wm82.a2.v1	0	0	0	0	0	1.46	0	0.76	0	0	0	0	0	1.99	0	0	0	0	0	0	0	1.58	0	0	0	0	0	0	0	1	0	1	0	0	0	0	0	2	0	0	0	0	0	0	0	1	0	0	Chr01
Glyma.01G058700.Wm82.a2.v1	0	0.71	0.47	0	0	0	0.49	0.45	0.67	0.36	0	0	0.42	0.2	0.96	0.48	0.49	0.18	0.91	0.93	0	0.31	0.62	0	0	3	1	0	0	0	2	3	3	1	0	0	1	1	8	2	2	1	7	5	0	1	4	0	Chr01
Glyma.01G059000.Wm82.a2.v1	0.74	0	0	0.52	0	0	0	0	0	0	0	0	0.5	0	0	0	0	0	0	0	0	0	0.37	0.7	2	0	0	1	0	0	0	0	0	0	0	0	1	0	0	0	0	0	0	0	0	0	2	1	Chr01
Glyma.01G059100.Wm82.a2.v1	1.78	1.59	1.35	2.07	1.54	0.55	0.93	1.85	0.64	1.03	0	0	2.79	0.93	0.8	0.68	2.08	0.52	0.99	0.89	0	0	0.44	1.69	6	7	3	5	4	2	4	13	3	3	0	0	7	5	7	3	9	3	8	5	0	0	3	3	Chr01
Glyma.01G059200.Wm82.a2.v1	4.71	5.29	7.17	7.03	7.34	6.38	3.45	5.44	3.59	1.09	2.8	3.07	9.3	4.33	3.89	5.54	6.86	5.12	3.79	5.09	3.69	0.94	3.45	2.39	15	22	15	16	18	22	14	36	16	3	8	3	22	22	32	23	28	28	29	27	7	3	22	4	Chr01
Glyma.01G059400.Wm82.a2.v1	1.21	0.46	0	0	0.79	0	0	0.87	0	0	0	0	0.81	0.38	0	0	0	0	0	0	0	0	0	0	2	1	0	0	1	0	0	3	0	0	0	0	1	1	0	0	0	0	0	0	0	0	0	0	Chr01
Glyma.01G059900.Wm82.a2.v1	0.74	0.94	0.75	1.38	0.96	0.68	0.77	0.71	0.53	0.85	0.55	0	0	1.39	1.05	0.76	1.15	0.72	0.92	0.74	1.65	0.49	0.61	1.4	3	5	2	4	3	3	4	6	3	3	2	0	0	9	11	4	6	5	9	5	4	2	5	3	Chr01
Glyma.01G060300.Wm82.a2.v1	1.06	0.27	0	1.97	2.29	2.61	2.49	3.4	2.27	1.63	2.36	4.6	0	0	0.41	1.35	2.48	4.73	1.76	2.33	1.78	1.41	1.06	1.34	3	1	0	4	5	8	9	20	9	4	6	4	0	0	3	5	9	23	12	11	3	4	6	2	Chr01
Glyma.01G060700.Wm82.a2.v1	1.22	2.06	2.6	4.1	1.27	1.81	1.73	2.7	1.57	1.13	0.82	0	2.31	2.45	2.65	4.13	3.43	3.42	3.15	1.76	1.23	0.98	1.22	1.86	5	11	7	12	4	8	9	23	9	4	3	0	7	16	28	22	18	24	31	12	3	4	10	4	Chr01
Glyma.01G060800.Wm82.a2.v1	0	0	0	0	0	0	0	0	0	0	0	0	0	0	0	0	0	0	0.07	0	0	0	0	0	0	0	0	0	0	0	0	0	0	0	0	0	0	0	0	0	0	0	1	0	0	0	0	0	Chr01
Glyma.01G060900.Wm82.a2.v1	250.38	233	378.95	268.75	322.8	259.38	244.47	214.46	265.33	162.29	134.45	288.77	316.13	224.85	252.29	318.29	248.72	207.3	169.67	157.15	255.14	155.95	176.93	156.53	435	529	433	334	432	488	542	775	645	244	210	154	408	623	1134	721	554	619	709	455	264	271	616	143	Chr01
Glyma.01G061000.Wm82.a2.v1	1.53	9.34	1.55	0	0.66	2.35	1.99	3.42	7.27	1.18	1.7	1.66	2.74	3.19	3.73	5.85	1.59	9.47	12.26	13.73	10.25	6.61	4.57	2.9	3	24	2	0	1	5	5	14	20	2	3	1	4	10	19	15	4	32	58	45	12	13	18	3	Chr01
Glyma.01G061100.Wm82.a2.v1	0	0	0	0	1.4	2.99	1.41	2.25	1.28	0	0.4	0	0	0	0	3.03	1.68	2.72	3.29	1.73	0.6	0.36	0.9	2.05	0	0	0	0	3	9	5	13	5	0	1	0	0	0	0	11	6	13	22	8	1	1	5	3	Chr01
Glyma.01G061500.Wm82.a2.v1	5.59	3.89	6.57	6.75	4.62	6.1	7.57	5.13	6	4.41	2.83	9.11	3.42	3.19	3.54	7.02	4.96	3.7	4.54	4.88	8.11	6.61	5.58	8.22	22	20	17	19	14	26	38	42	33	15	10	11	10	20	36	36	25	25	43	32	19	26	44	17	Chr01
Glyma.01G061800.Wm82.a2.v1	4.61	2.28	1.24	6.45	8.81	8.52	4.04	6.91	4.46	0.63	2.11	1.77	3.65	2.72	2.52	5.41	7.83	6.16	5.41	3.26	3.19	1.63	2.84	0.52	17	11	3	17	25	34	19	53	23	2	7	2	10	16	24	26	37	39	48	20	7	6	21	1	Chr01
Glyma.01G061900.Wm82.a2.v1	1.32	0	0	0	0.86	2.44	2.59	0.63	2.36	0	0	0	4.44	2.48	5.36	2.53	2.57	5.76	5.76	2.38	7.76	0	0	0	2	0	0	0	1	4	5	2	5	0	0	0	5	6	21	5	5	15	21	6	7	0	0	0	Chr01
Glyma.01G062000.Wm82.a2.v1	6.15	8.63	1.56	15.77	9.32	10.89	8.84	8.63	4.4	5.33	2.85	16.71	2.07	5.79	7.93	11.41	7.6	9.55	5.76	8.31	7.75	9.23	3.07	4.88	12	22	2	22	14	23	22	35	12	9	5	10	3	18	40	29	19	32	27	27	9	18	12	5	Chr01
Glyma.01G062100.Wm82.a2.v1	4.36	4.88	2.55	7.51	6.1	5.27	2.37	4.19	3.6	0.39	1.12	0	4.52	2.31	2.72	10.04	5.23	3.12	2.65	2.42	5.63	1.01	1.67	0.64	13	19	5	16	14	17	9	26	15	1	3	0	10	11	21	39	20	16	19	12	10	3	10	1	Chr01
Glyma.01G062200.Wm82.a2.v1	1.67	0.77	1.02	0.93	2.6	2.16	1.31	1.93	1.19	0.39	1.86	1.09	0	1.05	1.42	2.05	2.34	2.91	2.64	1.4	2.8	0	0.83	1.27	5	3	2	2	6	7	5	12	5	1	5	1	0	5	11	8	9	15	19	7	5	0	5	2	Chr01
Glyma.01G062300.Wm82.a2.v1	11.42	10.05	8.68	11.18	12.6	18.99	7.16	14	8.98	8.58	8.89	1.86	10.76	15.4	8.83	20.59	13.81	10.97	9.74	7.54	2.88	5.14	3.99	7.6	20	23	10	14	17	36	16	51	22	13	14	1	14	43	40	47	31	33	41	22	3	9	14	7	Chr01
Glyma.01G062400.Wm82.a2.v1	65.19	230.3	8.66	1.77	15.2	1.17	0	0.61	0	0	0	0	45.16	64.69	44.03	1.7	3.95	0.55	0.13	0	0	0	0	0	206	951	18	4	37	4	0	4	0	0	0	0	106	326	360	7	16	3	1	0	0	0	0	0	Chr01
Glyma.01G062600.Wm82.a2.v1	1.72	0	0.87	0	0	0	0	0	0	0	0	0	0	0.36	0.22	0	0	0	0	0	0	0	0	0	3	0	1	0	0	0	0	0	0	0	0	0	0	1	1	0	0	0	0	0	0	0	0	0	Chr01
Glyma.01G062900.Wm82.a2.v1	0.18	0	0	0	0.47	0	0	0.26	0	0	0	0	0	0	0.07	0.14	0.14	0	0.08	0	0.3	0	0.09	0	1	0	0	0	2	0	0	3	0	0	0	0	0	0	1	1	1	0	1	0	1	0	1	0	Chr01
Glyma.01G063000.Wm82.a2.v1	73.39	62.32	29.26	69.44	50.54	67.35	23.14	50.99	18.87	10.86	7.96	1.46	84.94	117.56	103.26	36.38	59.68	42.96	33.49	30.61	25.55	8.05	11.84	10.21	164	182	43	111	87	163	66	237	59	21	16	1	141	419	597	106	171	165	180	114	34	18	53	12	Chr01
Glyma.01G063100.Wm82.a2.v1	11.3	9.84	10.07	15.25	10.11	6.47	1.83	8.24	1.95	4.05	2.17	1.27	6.82	10.75	9.64	5.98	8.81	8.39	4.37	6.54	3.27	4.28	3.3	5.93	29	33	17	28	20	18	6	44	7	9	5	1	13	44	64	20	29	37	27	28	5	11	17	8	Chr01
Glyma.01G063200.Wm82.a2.v1	0	0	0	0	0	0	0	0	0	0	0	0	0	0	0	0	0	0	0	0	1.17	0	0	0	0	0	0	0	0	0	0	0	0	0	0	0	0	0	0	0	0	0	0	0	1	0	0	0	Chr01
Glyma.01G063600.Wm82.a2.v1	1.38	1.06	2.73	1.16	1.07	1.66	0.76	1.06	0.59	0.64	0	1.8	0.93	1.56	0.91	2.54	1.51	1.28	0.52	0.99	0.93	0.97	0.34	1.05	10	10	13	6	6	13	7	16	6	4	0	4	5	18	17	24	14	16	9	12	4	7	5	4	Chr01
Glyma.01G063700.Wm82.a2.v1	1.02	0.59	0.39	0.36	2.66	0.24	1.2	0.99	0.73	0	0.86	0	2.41	0.48	0.5	0.98	1	0.75	0.96	0.77	0.43	0	1.02	1.46	4	3	1	1	8	1	6	8	4	0	3	0	7	3	5	5	5	5	9	5	1	0	8	3	Chr01
Glyma.01G063800.Wm82.a2.v1	1.06	1.89	0.54	0	0	0	0	0	0.25	0	0	0	1.9	3.55	2.6	0	0	0	0.15	0	0	0	0	0	3	7	1	0	0	0	0	0	1	0	0	0	4	16	19	0	0	0	1	0	0	0	0	0	Chr01
Glyma.01G064000.Wm82.a2.v1	1.01	0.77	0	4.23	5.24	5.59	0	5.82	1.44	1.17	0	0	0	1.9	0.39	3.1	10.24	1.76	1.26	1.82	0	0	1.01	1.92	1	1	0	3	4	6	0	12	2	1	0	0	0	3	1	4	13	3	3	3	0	0	2	1	Chr01
Glyma.01G064100.Wm82.a2.v1	9.09	15.14	11.39	4.49	7.64	7.9	2.1	3.6	3.82	4.33	0.59	3.49	12.24	14.76	13.03	3.69	3.75	4.67	2.67	3.85	2.69	0	0.53	0	17	37	14	6	11	16	5	14	10	7	1	2	17	44	63	9	9	15	12	12	3	0	2	0	Chr01
Glyma.01G064400.Wm82.a2.v1	1.98	1.77	2.01	4.61	3.86	3.05	1.55	2.7	0.71	1.53	1.1	2.15	7.11	2.28	1.91	3.29	2.57	1.92	1.65	1.78	2.77	2.97	1.32	0.63	6	7	4	10	9	10	6	17	3	4	3	2	16	11	15	13	10	10	12	9	5	9	8	1	Chr01
Glyma.01G064500.Wm82.a2.v1	0	0	0	0	0	0.86	0	0.45	0	1.08	0	0	0	0	0	0	0.73	0	1.16	0	0	0	0	0	0	0	0	0	0	1	0	1	0	1	0	0	0	0	0	0	1	0	3	0	0	0	0	0	Chr01
Glyma.01G064600.Wm82.a2.v1	1.32	0.76	0	0.93	0	0	0.52	0.95	0	0	0	0	0.45	0.21	0.64	0.25	1.03	0	0	0	0	0	0	0	4	3	0	2	0	0	2	6	0	0	0	0	1	1	5	1	4	0	0	0	0	0	0	0	Chr01
Glyma.01G064900.Wm82.a2.v1	2.23	1.71	2.72	2.18	0.29	1.44	0.52	0.97	0.16	0	0	0	0.6	0.56	1.47	0.86	0.7	1.69	1.95	0.54	1.5	0	0.22	0.42	10	10	8	7	1	7	3	9	1	0	0	0	2	4	17	5	4	13	21	4	4	0	2	1	Chr01
Glyma.01G065000.Wm82.a2.v1	0	0	0	0	0	0	0	0	0	0	0	0	0	0	0	0	0.66	0	0	0	0	0	0	0	0	0	0	0	0	0	0	0	0	0	0	0	0	0	0	0	1	0	0	0	0	0	0	0	Chr01
Glyma.01G065100.Wm82.a2.v1	7.75	12.6	8.84	9.48	9.43	11.18	11.39	9.78	6.23	3.36	4.31	4.73	11.74	11.54	13.29	11.52	6.05	10.43	7.25	6.39	5.69	2.42	3.87	3.68	16	34	12	14	15	25	30	42	18	6	8	3	18	38	71	31	16	37	36	22	7	5	16	4	Chr01
Glyma.01G065400.Wm82.a2.v1	0	1.54	0	3.37	2.09	2.97	0.31	3.28	0.57	0	0	0	1.62	2.01	1.24	1.85	2.51	2.57	1.5	2.41	0	0	0	0	0	5	0	6	4	8	1	17	2	0	0	0	3	8	8	6	8	11	9	10	0	0	0	0	Chr01
Glyma.01G065800.Wm82.a2.v1	0.18	0	0	0	0.46	0	0	0	0.13	0.2	0	0	0	0.11	0.2	0	0	0	0.07	0	0	0	0	0.34	1	0	0	0	2	0	0	0	1	1	0	0	0	1	3	0	0	0	1	0	0	0	0	1	Chr01
Glyma.01G066500.Wm82.a2.v1	0	0.27	0	0	0	0	0.28	0.17	0	0	0	0	0.48	1.12	0.69	0	0.84	0	0	0	0	0	0	0	0	1	0	0	0	0	1	1	0	0	0	0	1	5	5	0	3	0	0	0	0	0	0	0	Chr01
Glyma.01G066600.Wm82.a2.v1	6.54	6.08	8.53	12.42	11.53	5.18	2.93	6.29	5.01	4.32	1.56	7.61	10.7	6.74	7.41	10.04	8.39	7.34	4.66	6.17	5.49	7.01	3.97	4.44	14	17	12	19	19	12	8	28	15	8	3	5	17	23	41	28	23	27	24	22	7	15	17	5	Chr01
Glyma.01G067000.Wm82.a2.v1	7	6.35	7.09	14.86	8.08	10.53	5.08	6.36	4.45	1.5	1.44	2.53	11.17	8.29	8.22	9.54	11.12	9.2	7.44	3.58	3.92	5.18	4.4	2.46	27	32	18	41	24	44	25	51	24	5	5	3	32	51	82	48	55	61	69	23	9	20	34	5	Chr01
Glyma.01G067100.Wm82.a2.v1	1.62	5.46	4.93	4.99	2.53	0.3	1.78	1.87	1.16	0.75	0.72	0	2.18	1.83	2.76	0.5	1.52	1.32	1.21	1.36	0.54	0	0.81	0	5	22	10	11	6	1	7	12	5	2	2	0	5	9	22	2	6	7	9	7	1	0	5	0	Chr01
Glyma.01G067200.Wm82.a2.v1	84.22	42.59	1.5	669.26	565.23	437.99	60.98	271.13	83.07	21.06	31.78	14.44	56.36	74.43	28.75	376.62	574.33	305.78	112.02	70.04	58.72	11.82	32.69	20.61	171	113	2	972	884	963	158	1145	236	37	58	9	85	241	151	997	1495	1067	547	237	71	24	133	22	Chr01
Glyma.01G067300.Wm82.a2.v1	3.43	1.57	8.34	1.92	2.67	0.63	6.45	2.31	4.9	5.55	6.1	2.23	0.92	2.15	0.53	1.58	1.07	0.4	3.71	4.53	1.15	4.11	5.13	1.3	5	3	8	2	3	1	12	7	10	7	8	1	1	5	2	3	2	1	13	11	1	6	15	1	Chr01
Glyma.01G067600.Wm82.a2.v1	8.56	7.69	10.19	31.23	24.17	18.22	7.88	15.04	6.92	5.16	1.24	1.21	9.52	10.51	8.63	16.28	17.72	10.4	9.44	10.72	8.75	3.35	4.83	9.2	23	27	18	60	50	53	27	84	26	12	3	1	19	45	60	57	61	48	61	48	14	9	26	13	Chr01
Glyma.01G067700.Wm82.a2.v1	0	0	0	0	0	0	0	0	0	0	0	0	0	0	0	0	0	0	0	0.91	0	0	0.76	0	0	0	0	0	0	0	0	0	0	0	0	0	0	0	0	0	0	0	0	1	0	0	1	0	Chr01
Glyma.01G067800.Wm82.a2.v1	0	0	0	0	0	0.53	0	0	0	0	0.64	0	0	0	0	0	0.45	0	0.24	0.35	0	0	0.86	0	0	0	0	0	0	1	0	0	0	0	1	0	0	0	0	0	1	0	1	1	0	0	3	0	Chr01
Glyma.01G067900.Wm82.a2.v1	6.88	3.62	3.92	6.01	7.26	7.94	5.05	5.99	4.92	1.99	3.83	2.8	2.89	6.47	3.16	6.26	4.69	6	6.26	5.93	2.17	2.15	2.79	4.09	16	11	6	10	13	20	15	29	16	4	8	2	5	24	19	19	14	24	35	23	3	5	13	5	Chr01
Glyma.01G068000.Wm82.a2.v1	15.85	17.52	11.48	9.85	13.06	15.33	6.7	11.01	7.19	4.36	2.8	2.46	12.87	17.35	9.34	8.1	11.77	13.91	8.05	7.7	6.34	3.02	4.65	3.35	63	91	30	28	40	66	34	91	40	15	10	3	38	110	96	42	60	95	77	51	15	12	37	7	Chr01
Glyma.01G068200.Wm82.a2.v1	6.69	6.93	8.98	0	0	0	0	0	0	0	0	0	10.6	8.89	12.33	0	0	0	0	0	0	0	0	0	17	23	15	0	0	0	0	0	0	0	0	0	20	36	81	0	0	0	0	0	0	0	0	0	Chr01
Glyma.01G068300.Wm82.a2.v1	0	0.99	0	0	0	1.19	1.01	1.24	0.92	0	0	0	0	0	2.49	0	0	0.75	0	0	0	0	0	0	0	1	0	0	0	1	1	2	1	0	0	0	0	0	5	0	0	1	0	0	0	0	0	0	Chr01
Glyma.01G068600.Wm82.a2.v1	7.79	7.5	10.96	12.5	10.11	7.99	5.88	9.43	7.42	6.33	3.21	2.82	9.32	7.59	6.58	11.06	9.67	10.74	6.59	3.81	4.84	3.46	3.31	5.48	27	34	25	31	27	30	26	68	36	19	10	3	24	42	59	50	43	64	55	22	10	12	23	10	Chr01
Glyma.01G068800.Wm82.a2.v1	3.4	3.12	2.76	2.22	2.65	1.26	0.89	1.96	0.81	0.52	0.5	0.74	3.66	2.7	3.07	1.74	1.95	0.66	0.94	0.54	0.76	0.91	1.02	0	15	18	8	7	9	6	5	18	5	2	2	1	12	19	35	10	11	5	10	4	2	4	9	0	Chr01
Glyma.01G068900.Wm82.a2.v1	1.26	0.96	0	2.2	1.23	2.61	2.71	0.91	2.25	0.73	1.05	2.05	2.54	0.59	0.73	3.14	1.47	1.28	1.44	1.32	1.06	1.57	0.94	0.6	4	4	0	5	3	9	11	6	10	2	3	2	6	3	6	13	6	7	11	7	2	5	6	1	Chr01
Glyma.01G069000.Wm82.a2.v1	3.24	0.83	0	0	0	0	0	1.04	0	1.25	0	0	1.45	7.45	8.36	0	0	0	0.9	0	0	0	1.08	0	3	1	0	0	0	0	0	2	0	1	0	0	1	11	20	0	0	0	2	0	0	0	2	0	Chr01
Glyma.01G069200.Wm82.a2.v1	6.67	1.28	0	16.32	10.83	9.24	0	2.41	2.38	0	0	0	4.49	8.37	1.29	5.12	9.11	4.85	0.69	0	0	0	0	0	4	1	0	7	5	6	0	3	2	0	0	0	2	8	2	4	7	5	1	0	0	0	0	0	Chr01
Glyma.01G069300.Wm82.a2.v1	0	0	0	0.99	0	0	0	0	0	0	0	0	0	0	0	0	0	0	0	0	0	0	0	0	0	0	0	1	0	0	0	0	0	0	0	0	0	0	0	0	0	0	0	0	0	0	0	0	Chr01
Glyma.01G069400.Wm82.a2.v1	1.84	2.11	0	9	1.19	5.94	8.65	9.73	7.23	1.06	2.05	0	4.95	1.73	4.62	5.64	7.17	7.49	11.09	8.83	6.18	1.84	1.84	0	2	3	0	7	1	7	12	22	11	1	2	0	4	3	13	8	10	14	29	16	4	2	4	0	Chr01
Glyma.01G069500.Wm82.a2.v1	11.42	6.72	10.68	4.91	4.18	3.51	1.61	2.81	2.93	0.34	2.28	0.95	8.28	6.24	6.68	3.37	5.25	5.11	2.07	2.11	1.97	1.76	1.75	0.56	39	30	24	12	11	13	7	20	14	1	7	1	21	34	59	15	23	30	17	12	4	6	12	1	Chr01
Glyma.01G069600.Wm82.a2.v1	1.81	2.77	5.51	5.07	1.18	0.84	1.42	2.61	0.65	0	0	0	1.22	3.98	3.85	3.47	2.83	0.53	0.38	0.54	0	3.62	3.16	6.89	2	4	4	4	1	1	2	6	1	0	0	0	1	7	11	5	4	1	1	1	0	4	7	4	Chr01
Glyma.01G070300.Wm82.a2.v1	3.2	2.45	2.03	4.11	3.81	1.48	0.21	3.34	0.76	0	0.3	0	1.8	1.51	1.86	2.05	3.33	0.93	0.78	1.12	0	0.27	0.27	0.51	12	12	5	11	11	6	1	26	4	0	1	0	5	9	18	10	16	6	7	7	0	1	2	1	Chr01
Glyma.01G070400.Wm82.a2.v1	11.63	7.63	13.76	14.2	26.84	16.2	19.82	17.49	16.49	18.13	13.76	12.03	11.18	9.15	8.99	17.42	18.29	17.72	11.67	11.85	14.26	19.01	17.69	15.8	63	54	49	55	112	95	137	197	125	85	67	20	45	79	126	123	127	165	152	107	46	103	192	45	Chr01
Glyma.01G070500.Wm82.a2.v1	0	0	0	0	0	0	0	0	0	0	0	0	0.34	0	0	0	0	0	0.11	0	0.43	0	0	0	0	0	0	0	0	0	0	0	0	0	0	0	1	0	0	0	0	0	1	0	1	0	0	0	Chr01
Glyma.01G070700.Wm82.a2.v1	5.58	5.49	5.45	3.34	10.35	5.15	3.44	4.98	3.7	5.53	4.43	6.49	3.22	4.25	3.7	2.14	4.66	5.1	4.31	7.65	5.35	5.58	4.97	3.03	14	18	9	6	20	14	11	26	13	12	10	5	6	17	24	7	15	22	26	32	8	14	25	4	Chr01
Glyma.01G071300.Wm82.a2.v1	97.7	108.09	100.18	118.05	218.76	149.31	230.27	121.79	241.68	76.58	92.67	178.88	132.03	106.85	114.61	193.14	135.87	131.1	152.56	147.7	256.23	90.48	145.13	99.38	258	373	174	223	445	427	776	669	893	175	220	145	259	450	783	665	460	595	969	650	403	239	768	138	Chr01
Glyma.01G071500.Wm82.a2.v1	0	5.36	0	0	0	9.7	1.37	1.68	2.5	2.02	0	0	0	1.1	2.71	8.06	2.73	6.11	1.46	1.05	0	0	2.62	0	0	4	0	0	0	6	1	2	2	1	0	0	0	1	4	6	2	6	2	1	0	0	3	0	Chr01
Glyma.01G071700.Wm82.a2.v1	1.36	1.9	2.06	0.32	0.88	0.83	1.42	1.95	0.97	1.04	0.5	0.74	3.04	2.55	4.19	2.25	0.88	0.53	0.75	1.22	0	0.45	0.79	0.43	6	11	6	1	3	4	8	18	6	4	2	1	10	18	48	13	5	4	8	9	0	2	7	1	Chr01
Glyma.01G071800.Wm82.a2.v1	0.78	0.6	0	0	0	0	0	0.37	0	0	0	0	0	0	0.9	0	0	0	0	0	0	0	0.39	0	1	1	0	0	0	0	0	1	0	0	0	0	0	0	3	0	0	0	0	0	0	0	1	0	Chr01
Glyma.01G072000.Wm82.a2.v1	4.84	5.13	4.53	7.81	4.84	3.78	2.63	5.73	4.26	2.58	0.41	3.64	4.51	3.74	3.46	6	6.68	5.64	3.87	2.68	6.88	2.98	3.35	2.13	13	18	8	15	10	11	9	32	16	6	1	3	9	16	24	21	23	26	25	12	11	8	18	3	Chr01
Glyma.01G072400.Wm82.a2.v1	0	0	0	0	0	0	0	0	0	0	0	0	0	0	0.05	0	0	0	0	0	0	0	0	0	0	0	0	0	0	0	0	0	0	0	0	0	0	0	1	0	0	0	0	0	0	0	0	0	Chr01
Glyma.01G072800.Wm82.a2.v1	4.93	7.54	9.36	10.33	4.8	3.41	1.93	4.74	0.88	0	4.11	0	4.97	4.63	4.76	10.39	2.88	1.43	3.07	1.48	4.13	2.46	1.23	0	4	8	5	6	3	3	2	8	1	0	3	0	3	6	10	11	3	2	6	2	2	2	2	0	Chr01
Glyma.01G073000.Wm82.a2.v1	0	0.41	0.82	0	0.7	1.5	0	2.08	0	0.62	0	0	0	1.02	0.83	0.83	0	1.26	2.47	1.94	0	0.54	0.81	0	0	1	1	0	1	3	0	8	0	1	0	0	0	3	4	2	0	4	11	6	0	1	3	0	Chr01
Glyma.01G073400.Wm82.a2.v1	0.22	0.34	0.34	0.62	0.29	0.82	0.35	0.64	0.32	0	0.25	0.72	0	0.28	0.09	0.68	0.52	0.39	0.09	0.13	0.37	0	0.11	0.42	1	2	1	2	1	4	2	6	2	0	1	1	0	2	1	4	3	3	1	1	1	0	1	1	Chr01
Glyma.01G073500.Wm82.a2.v1	0.92	0.53	1.75	0.97	0.9	1.7	1.45	1	1.98	1.07	0.26	3	0.93	1.3	1.07	1.24	1.62	0.94	1.05	1.52	1.16	0.46	1.04	0.44	4	3	5	3	3	8	8	9	12	4	1	4	3	9	12	7	9	7	11	11	3	2	9	1	Chr01
Glyma.01G073600.Wm82.a2.v1	0	0	0	0	0	0	0	0	0.37	0	0	0	0	0	0	0	0	0	0.43	0	0	0	0	0	0	0	0	0	0	0	0	0	1	0	0	0	0	0	0	0	0	0	2	0	0	0	0	0	Chr01
Glyma.01G074000.Wm82.a2.v1	2.03	1.13	1.69	3.36	4.32	2.22	2.61	2.13	3.04	0.64	2.88	1.81	1.49	2.2	1.79	1.7	1.73	2.8	2.38	1.55	1.55	3.14	1.48	2.11	11	8	6	13	18	13	18	24	23	3	14	3	6	19	25	12	12	26	31	14	5	17	16	6	Chr01
Glyma.01G074100.Wm82.a2.v1	2.87	0.73	1.45	2.68	2.48	5.3	2.25	3.22	0.68	2.21	0	0	0	2.4	1.11	2.94	1.49	3.34	0	1.15	0	1.91	2.39	1.82	3	1	1	2	2	6	3	7	1	2	0	0	0	4	3	4	2	6	0	2	0	2	5	1	Chr01
Glyma.01G074200.Wm82.a2.v1	0	0	0	0.94	0	0	0	0.32	0	0	0	0	0.9	1.26	1.04	1.03	0.52	0.78	0.56	0	0	0	0.67	0	0	0	0	1	0	0	0	1	0	0	0	0	1	3	4	2	1	2	2	0	0	0	2	0	Chr01
Glyma.01G074400.Wm82.a2.v1	12.34	18.89	12.99	7.96	27.11	16.66	14.88	15.52	19.68	2.19	7.39	15.46	20.45	11.91	19.82	20.39	21.47	12.71	11.05	15.38	7.97	2.85	6.16	9.03	13	26	9	6	22	19	20	34	29	2	7	5	16	20	54	28	29	23	28	27	5	3	13	5	Chr01
Glyma.01G074500.Wm82.a2.v1	2.33	2.98	2.96	4.35	3.03	2.51	2.44	2.62	1.95	3.15	0.87	2.53	5.76	4.15	3.31	5.67	4.55	2.72	2.59	1.63	2.61	1.56	1.36	5.92	6	10	5	8	6	7	8	14	7	7	2	2	11	17	22	19	15	12	16	7	4	4	7	8	Chr01
Glyma.01G074600.Wm82.a2.v1	0	0.65	0.64	0	0	0	0	0	0	0	0	0	1.13	0.53	0.33	0	0	0	0	0	0	0	0	0	0	2	1	0	0	0	0	0	0	0	0	0	2	2	2	0	0	0	0	0	0	0	0	0	Chr01
Glyma.01G074700.Wm82.a2.v1	6.79	3.6	2.78	2.19	4.07	5.07	2.87	5.65	0.93	1.21	1.45	0	2.81	5.57	5.05	3.81	4.69	4.1	3.15	1.88	0.88	2.09	1.3	0.99	26	18	7	6	12	21	14	45	5	4	5	0	8	34	50	19	23	27	29	12	2	8	10	2	Chr01
Glyma.01G074800.Wm82.a2.v1	13.4	4.56	16.98	3.12	0.97	0.69	0.58	2.15	0	0.86	0.83	0	6.01	10.27	12.66	0	0.58	0.87	1.24	1.34	0	0	0	1.42	18	8	15	3	1	1	1	6	0	1	1	0	6	22	44	0	1	2	4	3	0	0	0	1	Chr01
Glyma.01G075300.Wm82.a2.v1	0	0	0	1.25	0	0	0	0	0	0	0	0	0	0	0	0	1.39	0	0	0	0	0	0	0	0	0	0	1	0	0	0	0	0	0	0	0	0	0	0	0	2	0	0	0	0	0	0	0	Chr01
Glyma.01G075400.Wm82.a2.v1	4.28	0.89	8.87	2.72	2.02	3.59	3.05	6.73	4.72	2.25	3.89	1.27	6.28	3.66	4.06	3.58	5.46	3.62	4.85	5.13	3.92	3.11	2.52	3.7	11	3	15	5	4	10	10	36	17	5	9	1	12	15	27	12	18	16	30	22	6	8	13	5	Chr01
Glyma.01G075800.Wm82.a2.v1	0	0.32	0	0	0	0	0	0.6	0	0	0	0	0	0.52	0.16	0	0	0	0.17	0	0	0.42	0	0	0	1	0	0	0	0	0	3	0	0	0	0	0	2	1	0	0	0	1	0	0	1	0	0	Chr01
Glyma.01G075900.Wm82.a2.v1	0	0	0.76	0	0	0	0	0	0	0	0	0	0.68	0.32	0.58	0	0.78	0.29	0.42	0	0	0	0	0	0	0	1	0	0	0	0	0	0	0	0	0	1	1	3	0	2	1	2	0	0	0	0	0	Chr01
Glyma.01G076100.Wm82.a2.v1	1.08	0.41	1.23	0.76	1.05	0.75	0.85	0.78	0.19	0	0.6	0	1.45	0.51	1.46	1.04	0.42	0.94	1.35	0.49	0	0.54	0.13	0.51	4	2	3	2	3	3	4	6	1	0	2	0	4	3	14	5	2	6	12	3	0	2	1	1	Chr01
Glyma.01G076200.Wm82.a2.v1	1.53	0	2.32	1.07	3.97	1.41	0.6	2.94	0.55	2.65	1.7	2.49	0	0	0	1.17	0	0.44	0.32	1.83	0	1.53	2.67	1.45	2	0	2	1	4	2	1	8	1	3	2	1	0	0	0	2	0	1	1	4	0	2	7	1	Chr01
Glyma.01G076700.Wm82.a2.v1	0	0.7	0	1.28	0	0.85	0	0.44	0	0	0	0	1.24	0	1.78	0	0	1.07	0.38	0	0	0	0	0	0	1	0	1	0	1	0	1	0	0	0	0	1	0	5	0	0	2	1	0	0	0	0	0	Chr01
Glyma.01G076900.Wm82.a2.v1	0	0	1.12	0.51	0	0.34	0	0.18	0.26	0	0	0	0.5	0	0	0.28	0	0.21	0.31	0	0	0.37	0.18	0	0	0	2	1	0	1	0	1	1	0	0	0	1	0	0	1	0	1	2	0	0	1	1	0	Chr01
Glyma.01G077000.Wm82.a2.v1	1.36	1.56	0	0	0	0	0	0	0	0	0	0	0.91	0.85	2.1	0	0	0	0	0	0	0	0	0	2	3	0	0	0	0	0	0	0	0	0	0	1	2	8	0	0	0	0	0	0	0	0	0	Chr01
Glyma.01G077100.Wm82.a2.v1	3.22	1.48	0	0	0.84	0.59	0	0.93	1.84	0	0	0	0.87	1.62	1.74	0	2.01	2.25	1.07	1.16	0	0	1.29	0	5	3	0	0	1	1	0	3	4	0	0	0	1	4	7	0	4	6	4	3	0	0	4	0	Chr01
Glyma.01G077200.Wm82.a2.v1	6.11	4.96	7.2	4.88	5.02	4.14	2.64	4.31	3.21	2.3	0.69	3.65	3.69	3.99	3.76	5.35	2.82	4.93	3.37	3.59	2.09	3.24	1.99	3.55	49	52	38	28	31	36	27	72	36	16	5	9	22	51	78	56	29	68	65	48	10	26	32	15	Chr01
Glyma.01G077300.Wm82.a2.v1	4.32	5.87	4.37	4.36	3.42	2.88	1.5	3.8	3.94	1.66	1.07	2.34	4.2	5.11	4.91	4.05	4.68	3.63	2.19	2.3	4.03	1.44	0.84	0.46	18	32	12	13	11	13	8	33	23	6	4	3	13	34	53	22	25	26	22	16	10	6	7	1	Chr01
Glyma.01G077400.Wm82.a2.v1	7.92	8.08	8.95	6.25	11.34	7.31	4.61	6.15	5.08	2.35	1.13	4.63	9.29	5.98	8.24	9.97	9.82	4.84	5.49	4.02	4.77	3.05	2.33	0.77	39	52	29	22	43	39	29	63	35	10	5	7	34	47	105	64	62	41	65	33	14	15	23	2	Chr01
Glyma.01G077600.Wm82.a2.v1	2.52	3.38	4.32	3.53	2.87	2.33	0.25	2.88	1.8	0.36	1.05	1.03	3.82	4.95	4.15	2.42	2.71	3.67	2.89	3.6	0.53	0.32	1.1	1.2	8	14	9	8	7	8	1	19	8	1	3	1	9	25	34	10	11	20	22	19	1	1	7	2	Chr01
Glyma.01G077700.Wm82.a2.v1	1.75	1.34	7.96	3.66	0.57	0.4	0.34	0.84	0.31	0	0	0	1.17	1.09	1.69	0.33	0.34	0	1.09	0.26	0	0.44	0.22	0	4	4	12	6	1	1	1	4	1	0	0	0	2	4	10	1	1	0	6	1	0	1	1	0	Chr01
Glyma.01G077900.Wm82.a2.v1	12.18	16.43	14.11	9.73	8.28	11.25	6.36	6.41	6.22	2.68	1.29	1.89	9.37	14.19	8.75	4	8.14	8.1	6.27	6.27	7.79	2.9	2.03	4.41	21	37	16	12	11	21	14	23	15	4	2	1	12	39	39	9	18	24	26	18	8	5	7	4	Chr01
Glyma.01G078000.Wm82.a2.v1	1.08	2.48	2.46	0	0.7	0.5	0.42	0.52	0.39	1.25	0.6	0	2.18	1.69	2.5	0.41	1.26	1.88	0.22	0	1.81	0	0	0	2	6	3	0	1	1	1	2	1	2	1	0	3	5	12	1	3	6	1	0	2	0	0	0	Chr01
Glyma.01G078200.Wm82.a2.v1	5.58	1.9	10.38	0.87	0	0	0.49	0	0	0.72	1.38	0	0.84	3.11	7.43	0	0.48	0.36	0.77	0.74	0	0	0.93	0	9	4	11	1	0	0	1	0	0	1	2	0	1	8	31	0	1	1	3	2	0	0	3	0	Chr01
Glyma.01G078400.Wm82.a2.v1	2.71	1.61	2.29	2.94	1.56	1.67	1.89	1.88	2.15	1.39	0.67	0	2.83	3.77	1.63	2.54	2.35	1.22	2	1.08	2.02	0	0.6	0	9	7	5	7	4	6	8	13	10	4	2	0	7	20	14	11	10	7	16	6	4	0	4	0	Chr01
Glyma.01G078600.Wm82.a2.v1	0	0	0	1.55	0.96	0.68	0	0	0	0	0	0	0	0	0	0	0.57	0.86	0.15	0	0	0	0	0	0	0	0	3	2	2	0	0	0	0	0	0	0	0	0	0	2	4	1	0	0	0	0	0	Chr01
Glyma.01G078800.Wm82.a2.v1	21.06	19.22	13.55	0	0	2.99	2.54	5.06	4.63	3.74	4.5	7.92	27.26	14.22	33.19	3.73	0.63	8.48	6.74	6.8	6.8	1.62	4.04	1.54	26	31	11	0	0	4	4	13	8	4	5	3	25	28	106	6	1	18	20	14	5	2	10	1	Chr01
Glyma.01G079100.Wm82.a2.v1	0.53	1.82	2.81	3.69	1.71	0.73	0.21	2.03	0.57	0.31	1.17	0	1.78	1.49	0.71	1.21	1.24	0.92	1.32	1.27	2.66	1.32	0.79	0.5	2	9	7	10	5	3	1	16	3	1	4	0	5	9	7	6	6	6	12	8	6	5	6	1	Chr01
Glyma.01G079200.Wm82.a2.v1	0.83	0.96	1.27	2.33	4.87	4.23	2.94	3.2	2.98	4.33	3.24	1.36	0.56	3.4	1.77	0.96	2.92	3.15	1.9	2.5	0	2.08	2.49	2.38	2	3	2	4	9	11	9	16	10	9	7	1	1	13	11	3	9	13	11	10	0	5	12	3	Chr01
Glyma.01G079300.Wm82.a2.v1	7.53	8.07	7.79	10.11	10.56	7.51	6.37	8.55	6.03	0.7	3.69	3.93	16.63	10.01	10.13	6.01	8.22	6.31	4.51	5.78	4.55	4.82	4.51	2.86	25	35	17	24	27	27	27	59	28	2	11	4	41	53	87	26	35	36	36	32	9	16	30	5	Chr01
Glyma.01G079500.Wm82.a2.v1	6.92	6.61	5.59	3.63	8.14	6.59	8.13	9.25	7.1	4	7.21	1.41	5.24	3.52	4.51	9.94	7.58	5.41	8.45	7	3.63	3.89	6.47	3.7	32	40	17	12	29	33	48	89	46	16	30	2	18	26	54	60	45	43	94	54	10	18	60	9	Chr01
Glyma.01G079900.Wm82.a2.v1	0	0	0	0	0	0.94	0	0	0	0	0	0	0	0	0	0	0.4	0	0	0	0.86	0	0	0	0	0	0	0	0	2	0	0	0	0	0	0	0	0	0	0	1	0	0	0	1	0	0	0	Chr01
Glyma.01G080200.Wm82.a2.v1	87.35	95.73	76.25	65.58	98.7	108.05	49.02	75.18	70.14	34.89	47.98	22.84	84.2	76.75	91.29	75.68	103.46	85.02	67.71	61.8	59.75	25.34	36.86	35.89	162	232	93	87	141	217	116	290	182	56	80	13	116	227	438	183	246	271	302	191	66	47	137	35	Chr01
Glyma.01G080300.Wm82.a2.v1	0	0	0	0	0.85	0	0	0	0	0	0	0	0	0	0	0	0	0	0	0	0	0	0	0	0	0	0	0	1	0	0	0	0	0	0	0	0	0	0	0	0	0	0	0	0	0	0	0	Chr01
Glyma.01G080400.Wm82.a2.v1	6.87	17.73	1.31	8.4	3.34	12.68	2.02	12.79	4.91	3.97	2.86	0	5.78	13.45	8.96	6.58	12.05	12.49	6.42	6.18	2.88	0.86	0.86	0	8	27	1	7	3	16	3	31	8	4	3	0	5	25	27	10	18	25	18	12	2	1	2	0	Chr01
Glyma.01G080500.Wm82.a2.v1	5.18	3.25	5.02	12.52	2.45	2.61	0.74	5.89	3.03	2.72	1.57	1.54	5.71	5.32	8.02	1.81	3.31	3.02	3.33	4.24	1.58	1.41	1.65	0	11	9	7	19	4	6	2	26	9	5	3	1	9	18	44	5	9	11	17	15	2	3	7	0	Chr01
Glyma.01G080600.Wm82.a2.v1	0.95	0.97	0.97	0.89	0.82	0.88	1.24	1.22	0.23	1.1	0.71	0	0.85	0.4	0.61	0.97	0.74	1.66	0.66	0.19	0.53	0.32	0.79	0.6	3	4	2	2	2	3	5	8	1	3	2	0	2	2	5	4	3	9	5	1	1	1	5	1	Chr01
Glyma.01G080700.Wm82.a2.v1	13.87	15.39	10.02	8.24	9.46	11.85	12.77	10.34	10.91	6.01	12.73	4.52	16.81	12.18	13.14	14.63	10.82	15.74	11.54	12.69	14.56	8.67	7.27	5.94	40	58	19	17	21	37	47	62	44	15	33	4	36	56	98	55	40	78	80	61	25	25	42	9	Chr01
Glyma.01G080900.Wm82.a2.v1	11.47	13.16	9.81	16.03	8.37	13.24	6.18	6.89	6.15	3.31	2.39	0	11.58	14.83	6.65	7.15	12.3	9.17	4.17	3.87	3.61	1.43	2.86	2.73	16	24	9	16	9	20	11	20	12	4	3	0	12	33	24	13	22	22	14	9	3	2	8	2	Chr01
Glyma.01G081000.Wm82.a2.v1	4.68	2.39	0	4.37	20.27	24.51	0	0.75	1.12	0	1.74	0	0	5.87	4.22	14.37	21.92	4.54	0	0.94	0	0	0	0	3	2	0	2	10	17	0	1	1	0	1	0	0	6	7	12	18	5	0	1	0	0	0	0	Chr01
Glyma.01G081100.Wm82.a2.v1	8.36	2.74	7.26	5.01	8.14	5.79	5.38	5.6	3.41	2.07	1.99	6.81	6.83	4.12	5.08	3.43	4.66	5.91	1.74	1.43	2.51	1.79	1.64	1.14	28	12	16	12	21	21	23	39	16	6	6	7	17	22	44	15	20	34	14	8	5	6	11	2	Chr01
Glyma.01G081300.Wm82.a2.v1	26	24.4	4.85	5.83	8.92	26.05	6.15	21.82	14.55	6.8	10.64	9.59	21.13	29.53	25.79	22.76	18.37	27.54	19.89	14.13	9.47	5.64	8.45	6.53	106	130	13	17	28	115	32	185	83	24	39	12	64	192	272	121	96	193	195	96	23	23	69	14	Chr01
Glyma.01G081400.Wm82.a2.v1	0	0	0	12.62	6.39	3.03	0	1.18	0	0	0	0	0	0.51	0	0.63	1.28	0.96	0.34	0.49	0	0	0	0	0	0	0	11	6	4	0	3	0	0	0	0	0	1	0	1	2	2	1	1	0	0	0	0	Chr01
Glyma.01G081500.Wm82.a2.v1	45.41	56.65	33.14	60.95	61.9	62.48	31.32	54.36	35.05	35.16	42.94	8.88	45.24	46.41	40.37	57.12	49.94	40.16	41.54	39.51	38.89	34.05	29.91	31.95	100	163	48	96	105	149	88	249	108	67	85	6	74	163	230	164	141	152	220	145	51	75	132	37	Chr01
Glyma.01G081600.Wm82.a2.v1	47.43	27.28	101.68	2.06	0	0	0.46	0	0.63	0	0.66	0	40.45	41.38	53.75	0	0.69	0.51	0.37	0	0.99	0	0	0	161	121	227	5	0	0	2	0	3	0	2	0	102	224	472	0	3	3	3	0	2	0	0	0	Chr01
Glyma.01G081900.Wm82.a2.v1	2.24	2.29	0	2.09	2.91	1.72	0.29	0.72	0	0	0	0	4.52	4.21	3.9	2.29	4.08	3.91	0.78	0.67	0	0	0	0	6	8	0	4	6	5	1	4	0	0	0	0	9	18	27	8	14	18	5	3	0	0	0	0	Chr01
Glyma.01G082000.Wm82.a2.v1	1.86	3.19	9.87	0	0	0.43	0	0.22	0	0	0	0	1.25	0.87	5.92	0.36	0	0.27	0	0.28	0	0	0	0	4	9	14	0	0	1	0	1	0	0	0	0	2	3	33	1	0	1	0	1	0	0	0	0	Chr01
Glyma.01G082200.Wm82.a2.v1	17.38	13.76	16.4	12.99	9.34	12.18	4.93	10.37	5.35	5.19	4.67	1.95	12.91	12.96	18.07	8.5	11.22	11.86	6.98	9.35	8.05	3	4.93	3.99	58	60	36	31	24	44	21	72	25	15	14	2	32	69	156	37	48	68	56	52	16	10	33	7	Chr01
Glyma.01G082400.Wm82.a2.v1	3.71	5.24	6.07	10.37	5.56	6.06	4.92	6.31	1.43	2.31	4.13	0.93	3.46	8.23	8.6	2.63	5.79	4.15	3.56	2.57	1.44	2.28	2.85	2.71	13	24	14	26	15	23	22	46	7	7	13	1	9	46	78	12	26	25	30	15	3	8	20	5	Chr01
Glyma.01G082500.Wm82.a2.v1	18.52	8.86	25.81	21.58	3.01	1.43	7.26	5.56	6.07	0.89	5.15	0	9.35	15.97	11.63	3.55	1.81	9.88	8.02	9.26	3.89	3.86	5.78	7.34	24	15	22	20	3	2	12	15	11	1	6	0	9	33	39	6	3	22	25	20	3	5	15	5	Chr01
Glyma.01G082600.Wm82.a2.v1	1.88	0	0	0	0	0	0	0	0	0	0	0	0	1.18	0.73	0	0	0.55	0.39	0	0	0	0	0	2	0	0	0	0	0	0	0	0	0	0	0	0	2	2	0	0	1	1	0	0	0	0	0	Chr01
Glyma.01G082700.Wm82.a2.v1	0.83	1.12	1.9	1.46	1.9	1.93	1.8	1.3	1.19	0.96	1.16	2.72	1.68	1.96	2.1	1.6	0.81	1.46	0.78	1.25	0.7	1.46	0.21	0	4	7	6	5	7	10	11	13	8	4	5	4	6	15	26	10	5	12	9	10	2	7	2	0	Chr01
Glyma.01G082800.Wm82.a2.v1	0.55	0	0.84	0	0	0.51	0.87	1.6	0.79	0	0	0	0	0.35	0.43	0	1.3	0.32	1.38	1.33	0	0	0	0	1	0	1	0	0	1	2	6	2	0	0	0	0	1	2	0	3	1	6	4	0	0	0	0	Chr01
Glyma.01G083000.Wm82.a2.v1	2.35	1.8	8.95	0	1.53	0	1.84	0.38	0.56	0	0	0	2.64	3.44	4.25	0	0	0.23	0.33	0.71	0	0	0.2	0	6	6	15	0	3	0	6	2	2	0	0	0	5	14	28	0	0	1	2	3	0	0	1	0	Chr01
Glyma.01G083100.Wm82.a2.v1	3.26	5.98	0.99	4.55	8.45	5.41	0.51	4.38	0.93	0.75	0	0	0.88	2.86	2.01	9.99	7.11	3.41	2.17	0.39	2.19	0.65	1.62	0	5	12	1	5	10	9	1	14	2	1	0	0	1	7	8	20	14	9	8	1	2	1	5	0	Chr01
Glyma.01G083300.Wm82.a2.v1	0	0	0	0	0	0	0	0	0	0	0	0	1.15	0.54	0	0	0.33	0.25	0.36	0	0	0	0	0	0	0	0	0	0	0	0	0	0	0	0	0	2	2	0	0	1	1	2	0	0	0	0	0	Chr01
Glyma.01G083400.Wm82.a2.v1	1.91	0.97	0.97	0.89	0	0	0.5	1.53	0.45	1.47	2.12	2.07	0.86	3.19	2.71	1.95	0.5	2.96	1.85	2.29	1.07	0.64	0.95	3.63	3	2	1	1	0	0	1	5	1	2	3	1	1	8	11	4	1	8	7	6	1	1	3	3	Chr01
Glyma.01G083600.Wm82.a2.v1	0	0	0	0	0	0	0	0	0	0	0	0	0	0	0.25	0	0	0	0	0	0	0	0	0	0	0	0	0	0	0	0	0	0	0	0	0	0	0	1	0	0	0	0	0	0	0	0	0	Chr01
Glyma.01G083700.Wm82.a2.v1	1.67	0.77	2.03	3.73	2.16	1.54	1.04	2.08	1.67	1.16	0.37	1.09	0.45	0.21	1.55	1.53	0.52	0.58	1.11	0.6	0	1.67	0.5	1.9	5	3	4	8	5	5	4	13	7	3	1	1	1	1	12	6	2	3	8	3	0	5	3	3	Chr01
Glyma.01G084200.Wm82.a2.v1	0	0	0	0	0	0.32	0	0	0.5	0.41	0.39	0	0	0	0	0	0	0	0	0	0	0	0.18	0	0	0	0	0	0	1	0	0	2	1	1	0	0	0	0	0	0	0	0	0	0	0	1	0	Chr01
Glyma.01G084400.Wm82.a2.v1	0	0	0	0	0	0	0	0	0	0	0	0	0	0	0.71	0	0	0	0	0	0	0	0	0	0	0	0	0	0	0	0	0	0	0	0	0	0	0	1	0	0	0	0	0	0	0	0	0	Chr01
Glyma.01G084500.Wm82.a2.v1	4.39	1.92	4.13	1.17	3.53	2.12	1.64	2.82	1.64	1.21	2.09	3.41	5.35	4.33	5.25	2.41	2.94	2.8	1.57	2.51	2.11	4.81	2.5	3.58	21	12	13	4	13	11	10	28	11	5	9	5	19	33	65	15	18	23	18	20	6	23	24	9	Chr01
Glyma.01G084600.Wm82.a2.v1	4.09	7.47	5.27	2.2	2.86	5.53	4.44	7.27	4.95	0.73	1.05	1.03	9.75	15.01	19.11	3.87	4.18	7.88	6.15	6.24	3.7	1.26	2.2	3.59	13	31	11	5	7	19	18	48	22	2	3	1	23	76	157	16	17	43	47	33	7	4	14	6	Chr01
Glyma.01G084700.Wm82.a2.v1	18.38	23.81	32.25	36.57	42.22	32.64	23.82	32.63	22.23	19.61	11.8	16.12	22.84	28.37	27.33	31.45	30.88	30.03	20.87	18.24	14.25	9.19	8.82	9.41	26	44	30	37	46	50	43	96	44	24	15	7	24	64	100	58	56	73	71	43	12	13	25	7	Chr01
Glyma.01G084800.Wm82.a2.v1	2.13	1.17	5.1	0.85	0.4	0	0.72	0.88	0	0.7	0	2.98	1.64	2.68	5.07	1.4	0.71	0.71	0.63	0.55	0	0.91	0.76	1.16	7	5	11	2	1	0	3	6	0	2	0	3	4	14	43	6	3	4	5	3	0	3	5	2	Chr01
Glyma.01G085000.Wm82.a2.v1	1.53	0	0	2.14	9.92	4.24	2.4	5.15	3.28	0	1.7	0	0	0	0	7.04	7.16	8.01	9.54	6.42	0	3.06	0	5.81	1	0	0	1	5	3	2	7	3	0	1	0	0	0	0	6	6	9	15	7	0	2	0	2	Chr01
Glyma.01G085200.Wm82.a2.v1	0	1.08	0	0	0	0.65	0	1.01	0.25	0	0	0	1.42	0.44	0.14	0.27	0	0	0.44	0.63	0	0	0.18	0	0	4	0	0	0	2	0	6	1	0	0	0	3	2	1	1	0	0	3	3	0	0	1	0	Chr01
Glyma.01G085300.Wm82.a2.v1	2.59	0.99	0.98	7.23	1.68	1.79	0.51	1.55	0.46	0.75	0	0	0.87	0.41	0.75	2.48	3.03	1.13	2.15	1.55	2.17	0	0.97	0	4	2	1	8	2	3	1	5	1	1	0	0	1	1	3	5	6	3	8	4	2	0	3	0	Chr01
Glyma.01G085500.Wm82.a2.v1	0.96	0.73	0	0.67	0.62	0	0.75	0.23	0.68	0	0.53	0	0	0	0.18	0.73	0.37	1.67	0.8	0.86	0.8	0	0.72	0	2	2	0	1	1	0	2	1	2	0	1	0	0	0	1	2	1	6	4	3	1	0	3	0	Chr01
Glyma.01G085800.Wm82.a2.v1	3.6	5.16	2.05	0	0	0	0	0.65	0	0	0	0	2.42	2.82	2.61	0.69	0	0.26	0.19	0	0	0	0	0	8	15	3	0	0	0	0	3	0	0	0	0	4	10	15	2	0	1	1	0	0	0	0	0	Chr01
Glyma.01G086000.Wm82.a2.v1	3	3.28	5.87	7.79	7.24	3.96	4.37	3.09	2.15	1.49	0.95	2.79	2.31	2.15	1.82	7.57	4.35	1.5	3.39	2.57	5.04	1.72	1.5	0.82	7	10	9	13	13	10	13	15	7	3	2	2	4	8	11	23	13	6	19	10	7	4	7	1	Chr01
Glyma.01G086500.Wm82.a2.v1	0	0	0	0	0	0	1.15	0	0	0	0	0	0	0	0	0	0	0	0	0	0	0	0	0	0	0	0	0	0	0	1	0	0	0	0	0	0	0	0	0	0	0	0	0	0	0	0	0	Chr01
Glyma.01G086600.Wm82.a2.v1	0.53	0.54	1.07	1.47	1.14	0.32	0.41	0.93	0.13	0.4	0	2.28	0.24	0.55	0.47	1.21	1.09	0.82	0.44	0.53	0.29	0	0.79	0.33	3	4	4	6	5	2	3	11	1	2	0	4	1	5	7	9	8	8	6	5	1	0	9	1	Chr01
Glyma.01G086700.Wm82.a2.v1	0.45	0.68	2.04	3.75	4.06	1.65	0.35	0.86	0.96	1.55	1.99	0	1.2	0.84	0.86	0.34	1.05	0.78	2.23	1.07	0.75	0.89	0.89	0.85	1	2	3	6	7	4	1	4	3	3	4	0	2	3	5	1	3	3	12	4	1	2	4	1	Chr01
Glyma.01G086800.Wm82.a2.v1	0	0	0	0	0.83	1.18	1	1.84	1.37	0.74	1.42	0	0	0	0	2.45	1.49	1.48	1.06	1.53	2.14	0.64	1.91	1.21	0	0	0	0	1	2	2	6	3	1	2	0	0	0	0	5	3	4	4	4	2	1	6	1	Chr01
Glyma.01G086900.Wm82.a2.v1	2.03	1.03	3.08	8.49	7.01	11.22	6.35	14.28	6.27	2.34	6.76	2.2	0.91	2.54	1.83	5.18	8.95	12.96	7.02	7.29	6.8	3.37	6.4	6.42	3	2	3	9	8	18	12	44	13	3	9	1	1	6	7	10	17	33	25	18	6	5	19	5	Chr01
Glyma.01G087000.Wm82.a2.v1	6.87	5.61	9.75	10.89	6.54	8.88	3.59	5.95	7.86	1.59	1.02	1.49	4.93	3.73	6.73	7.73	3.57	4.53	5.71	6.6	3.08	1.83	1.83	3.48	15	16	14	17	11	21	10	27	24	3	2	1	8	13	38	22	10	17	30	24	4	4	8	4	Chr01
Glyma.01G087100.Wm82.a2.v1	0	0	0	0	0	0	0	0	0	0	0	0	0	0	0	0	0	0.63	0	0	0	0	0	0	0	0	0	0	0	0	0	0	0	0	0	0	0	0	0	0	0	1	0	0	0	0	0	0	Chr01
Glyma.01G087300.Wm82.a2.v1	0	1	1.99	0	0	0	1.03	0.63	0	0	1.46	0	0	0	1.01	1	1.02	0	0	0	2.2	1.31	0	0	0	1	1	0	0	0	1	1	0	0	1	0	0	0	2	1	1	0	0	0	1	1	0	0	Chr01
Glyma.01G087500.Wm82.a2.v1	1.21	2.16	5.51	5.06	0.52	0	0	0	0	0	0	0	3.25	3.78	1.56	0.62	0.31	0.47	0.17	0	0	0	0	0	3	7	9	9	1	0	0	0	0	0	0	0	6	15	10	2	1	2	1	0	0	0	0	0	Chr01
Glyma.01G087600.Wm82.a2.v1	3.49	1.78	1.77	0	1.51	2.15	0	1.12	0	0	0	0	0	0.73	0.45	0	0	1.35	0.48	0	0	0	0.58	0	3	2	1	0	1	2	0	2	0	0	0	0	0	1	1	0	0	2	1	0	0	0	1	0	Chr01
Glyma.01G087700.Wm82.a2.v1	3.01	1.92	0.38	5.61	6.52	5.56	0.79	4.1	1.61	2.03	0.28	0	3.04	2.2	1.94	4.43	3.13	2.77	3.13	1.51	1.26	1	1.5	0.95	12	10	1	16	20	24	4	34	9	7	1	0	9	14	20	23	16	19	30	10	3	4	12	2	Chr01
Glyma.01G087800.Wm82.a2.v1	6.86	3.87	8.79	18.68	15	13.67	12.45	13.37	10.58	4.59	13.66	12.94	10.21	8.15	9.91	17.73	12.96	14.71	14.57	12.35	13.34	6.14	8.29	8.24	19	14	16	37	32	41	44	77	41	11	34	11	21	36	71	64	46	70	97	57	22	17	46	12	Chr01
Glyma.01G087900.Wm82.a2.v1	0	1.12	0.89	1.63	0	0	0.23	0.84	0	0.34	0	0	0	0.73	0.34	0.22	0.23	0.85	0.24	0.18	0.49	0	0.15	0	0	5	2	4	0	0	1	6	0	1	0	0	0	4	3	1	1	5	2	1	1	0	1	0	Chr01
Glyma.01G088000.Wm82.a2.v1	0	2.5	0	3.42	2.12	3.01	0.64	0.78	0	0	0.91	2.66	0	3.07	3.15	1.88	1.91	1.42	1.7	0.49	1.37	0	0	0	0	4	0	3	2	4	1	2	0	0	1	1	0	6	10	3	3	3	5	1	1	0	0	0	Chr01
Glyma.01G088200.Wm82.a2.v1	3.08	2.62	0.52	3.35	2.22	2.85	1.07	1.32	0.24	0	0.38	0	1.38	2.79	1.72	4.21	3.21	0.8	1.28	0.21	0.58	0.69	0.17	0	9	10	1	7	5	9	4	8	1	0	1	0	3	13	13	16	12	4	9	1	1	2	1	0	Chr01
Glyma.01G088300.Wm82.a2.v1	0	0	0	0	0	0	0.3	0.18	0	0	0	1.23	0	0.24	0.15	0.29	0.88	0.88	0.31	0.68	0	0	0.38	0.72	0	0	0	0	0	0	1	1	0	0	0	1	0	1	1	1	3	4	2	3	0	0	2	1	Chr01
Glyma.01G088700.Wm82.a2.v1	1.32	0	0	0	0	0	0	0.64	0	0	1.47	0	0	0	0.51	0	0	0	0	0	0	0	0	0	1	0	0	0	0	0	0	1	0	0	1	0	0	0	1	0	0	0	0	0	0	0	0	0	Chr01
Glyma.01G089000.Wm82.a2.v1	0.55	1.68	0.83	1.53	3.56	1.52	1.72	2.11	1.96	1.27	0.61	1.79	0	0.69	1.27	0.84	0.43	1.28	1.6	0.66	0.92	1.1	0.27	0	1	4	1	2	5	3	4	8	5	2	1	1	0	2	6	2	1	4	7	2	1	2	1	0	Chr01
Glyma.01G089100.Wm82.a2.v1	16.42	12.57	12.49	16.7	17.93	15.86	10.53	17.05	14.94	9.92	9.96	4.86	15.58	14.51	15.01	14.31	10.48	13.9	14.59	14.78	14.42	8.58	10.62	9.94	44	44	22	32	37	46	36	95	56	23	24	4	31	62	104	50	36	64	94	66	23	23	57	14	Chr01
Glyma.01G089300.Wm82.a2.v1	0.19	0.15	0.59	0	0.25	0	0	0.47	0.14	0.22	0.43	1.9	0.26	0.24	0.68	0.15	0	0.79	1.54	0.93	1.96	0.78	1.07	0.37	1	1	2	0	1	0	0	5	1	1	2	3	1	2	9	1	0	7	19	8	6	4	11	1	Chr01
Glyma.01G089500.Wm82.a2.v1	3.6	3.35	5.09	4.32	2.67	2.38	3.23	4.21	1.66	3.27	1.72	5.87	4.51	1.78	1.29	2.76	2.21	3.9	3.53	3.71	2.59	1.29	2.31	2.94	14	17	13	12	8	10	16	34	9	11	6	7	13	11	13	14	11	26	33	24	6	5	18	6	Chr01
Glyma.01G089600.Wm82.a2.v1	2.18	3.75	6.62	4.56	10.59	4.02	8.53	4.71	4.67	5.66	5.45	3.54	3.66	1.36	2.31	2.09	2.97	3.48	5.43	1.63	3.65	1.09	5.7	3.1	4	9	8	6	15	8	20	18	12	9	9	2	5	4	11	5	7	11	24	5	4	2	21	3	Chr01
Glyma.01G089700.Wm82.a2.v1	0	0	0	0	0	0	0	0	0	0	0	0	0	1.3	0.4	0	0	0.6	1.29	0	0	1.03	0.52	0	0	0	0	0	0	0	0	0	0	0	0	0	0	2	1	0	0	1	3	0	0	1	1	0	Chr01
Glyma.01G089800.Wm82.a2.v1	0	0	0	0	0	0.57	0	0.89	0	0	0	0	0	0	0	1.42	2.41	2.52	0.51	0	1.04	0	0.93	0	0	0	0	0	0	1	0	3	0	0	0	0	0	0	0	3	5	7	2	0	1	0	3	0	Chr01
Glyma.01G089900.Wm82.a2.v1	17.82	17.56	16.07	17.73	16.47	19.24	15.15	16.41	14.25	11.87	7.39	12.79	16.26	13.44	15.64	21.31	24.73	18.63	13.56	12.87	9.63	7.85	8.74	9.19	59	76	35	42	42	69	64	113	66	34	22	13	40	71	134	92	105	106	108	71	19	26	58	16	Chr01
Glyma.01G090200.Wm82.a2.v1	0.4	0.92	0.61	0.56	1.04	2.95	0.94	3.46	0.29	0	0	0	0	1.25	0.77	2.45	3.74	5.12	2.66	0	0	0.8	0.4	0	1	3	1	1	2	8	3	18	1	0	0	0	0	5	5	8	12	22	16	0	0	2	2	0	Chr01
Glyma.01G090400.Wm82.a2.v1	0	0	0	3.33	0	0	0	0	0	0	0	0	0	0	0	0	0	0	0	0	0	0	0	0	0	0	0	4	0	0	0	0	0	0	0	0	0	0	0	0	0	0	0	0	0	0	0	0	Chr01
Glyma.01G090700.Wm82.a2.v1	2.22	0.42	0	0	0	0	0	0	0	0	0	0	0	1.39	0.21	0	0.43	0	0	0	0	0	0	0	4	1	0	0	0	0	0	0	0	0	0	0	0	4	1	0	1	0	0	0	0	0	0	0	Chr01
Glyma.01G090800.Wm82.a2.v1	0	0	0	0	0	0	0	2.22	0	0	0	0	0	0	0	0	0	2.01	0.48	2.77	0	0	0	0	0	0	0	0	0	0	0	4	0	0	0	0	0	0	0	0	0	3	1	4	0	0	0	0	Chr01
Glyma.01G090900.Wm82.a2.v1	8.24	6.3	9.74	11.51	2.38	4.22	0.72	6.6	1.31	0	0	0	6.16	6.89	4.95	5.61	10.71	3.19	1.14	0.55	3.07	0.91	0.46	0	9	9	7	9	2	5	1	15	2	0	0	0	5	12	14	8	15	6	3	1	2	1	1	0	Chr01
Glyma.01G091000.Wm82.a2.v1	0	0	0	1.42	0.79	0	0	0	0	0	0	0.66	0	0.13	0	0.31	0	0.12	0.25	0	0	0	0	0	0	0	0	5	3	0	0	0	0	0	0	1	0	1	0	2	0	1	3	0	0	0	0	0	Chr01
Glyma.01G091100.Wm82.a2.v1	0	0	0	1.56	0.73	0	0	0.27	0	0	0	0	0	0	0	0	0.22	0	0	0	0	0	0	0	0	0	0	4	2	0	0	2	0	0	0	0	0	0	0	0	1	0	0	0	0	0	0	0	Chr01
Glyma.01G091800.Wm82.a2.v1	2.09	1.24	0	7.45	3.61	3	0.18	3.57	0.17	0	0	0.76	1.25	1.02	0.9	2.67	2.53	2.02	0.77	0	0	0	0	0	9	7	0	23	12	14	1	32	1	0	0	1	4	7	10	15	14	15	8	0	0	0	0	0	Chr01
Glyma.01G092100.Wm82.a2.v1	4.65	6.52	4.71	6.5	8.05	5.72	7.89	6.33	1.66	3.58	3.45	10.1	5.22	4.86	4.79	8.32	7.25	4.06	6.44	5.12	2.6	3.1	2.71	2.95	6	11	4	6	8	8	13	17	3	4	4	4	5	10	16	14	12	9	20	11	2	4	7	2	Chr01
Glyma.01G092300.Wm82.a2.v1	45.65	5.75	131.79	87.24	135.78	133.4	91.47	164.74	116.87	15.36	21.85	35.77	18.67	28.99	104.75	197.22	131.61	171.14	120.85	139.74	178.52	21.95	47.58	38.46	79	13	150	108	181	250	202	593	283	23	34	19	24	80	469	445	292	509	503	403	184	38	165	35	Chr01
Glyma.01G092400.Wm82.a2.v1	3.7	5.31	3.75	3.02	3.8	4.84	3.5	5.19	3.86	2.85	2.4	4.02	3.32	2.61	3.64	4.85	3.37	3.59	4.62	4.53	4.92	3.24	3.23	2.64	24	45	16	14	19	34	29	70	35	16	14	8	16	27	61	41	28	40	72	49	19	21	42	9	Chr01
Glyma.01G092900.Wm82.a2.v1	0.58	0.88	0.66	2.02	2.25	0.8	0.34	1.32	0.62	0.17	0.16	0	0.97	1.63	1.17	1	1.8	0.84	0.54	0	0.24	0.58	0.5	0.27	4	8	3	10	12	6	3	19	6	1	1	0	5	18	21	9	16	10	9	0	1	4	7	1	Chr01
Glyma.01G093000.Wm82.a2.v1	2.96	4.52	4.49	2.3	3.41	3.03	1.29	4.1	1.88	1.52	2.56	5.35	3.09	2.26	3.17	3.78	2.82	2.48	1.77	0.99	4.96	2.3	1.64	2.5	9	18	9	5	8	10	5	26	8	4	7	5	7	11	25	15	11	13	13	5	9	7	10	4	Chr01
Glyma.01G093100.Wm82.a2.v1	0	0.58	0.38	2.11	0.98	0.46	0.39	1.69	0.9	1.16	0	0	0	1.11	0.49	0.58	0.39	0.59	0.42	0.76	0.42	0.76	0.38	0.96	0	3	1	6	3	2	2	14	5	4	0	0	0	7	5	3	2	4	4	5	1	3	3	2	Chr01
Glyma.01G093200.Wm82.a2.v1	2.97	0.38	3.01	2.07	0	0.46	1.16	0.95	1.06	0	0	0	2	2.79	0.76	1.14	3.86	1.15	0.82	0.3	0.83	0	0	0	6	1	4	3	0	1	3	4	3	0	0	0	3	9	4	3	10	4	4	1	1	0	0	0	Chr01
Glyma.01G093400.Wm82.a2.v1	0	0	0.58	0	0	0	0.9	0	0	0	0	0	0.51	0.24	0.44	0	0	0	0	0	0	0	0	0	0	0	1	0	0	0	3	0	0	0	0	0	1	1	3	0	0	0	0	0	0	0	0	0	Chr01
Glyma.01G093800.Wm82.a2.v1	0	0.73	0	0	0	0.88	0	0	0	0	0	0	0	0	0.74	0	0	0	0.4	0	0	0	0	0	0	1	0	0	0	1	0	0	0	0	0	0	0	0	2	0	0	0	1	0	0	0	0	0	Chr01
Glyma.01G094000.Wm82.a2.v1	0	0	0	0.78	0.73	0	0	0	0	0	0	0	0	0	0	0	0	0	0	0	0	0	0	0	0	0	0	1	1	0	0	0	0	0	0	0	0	0	0	0	0	0	0	0	0	0	0	0	Chr01
Glyma.01G094200.Wm82.a2.v1	6.16	5.71	5.22	5.3	7.69	7.55	4.73	7.23	3.73	3.7	3.43	3.09	6.22	6.02	7.88	5.54	7.3	7.93	6.06	5.83	3.98	2.49	2.07	2.7	52	63	29	32	50	69	51	127	44	27	26	8	39	81	172	61	79	115	123	82	20	21	35	12	Chr01
Glyma.01G094600.Wm82.a2.v1	0	0.69	1.37	0.63	1.17	0.42	1.06	1.52	0.32	0.52	0	0	0	0.28	0.87	0.35	1.06	0.79	0.75	1.89	0	0.9	0.45	0	0	2	2	1	2	1	3	7	1	1	0	0	0	1	5	1	3	3	4	7	0	2	2	0	Chr01
Glyma.01G094800.Wm82.a2.v1	1.32	1.34	0.67	0.61	0.85	1.62	0.69	1.9	0.78	0.51	1.22	0	0.89	2.06	1.61	0.34	1.88	1.53	0.91	0.92	0.37	1.31	0.44	0.83	6	8	2	2	3	8	4	18	5	2	5	0	3	15	19	2	11	12	10	7	1	6	4	2	Chr01
Glyma.01G094900.Wm82.a2.v1	3.45	1.17	4.09	4.29	1	0.35	0.9	3.88	0.27	1.33	0	0	0.52	2.17	1.78	1.18	0.3	1.12	2.07	1.61	1.29	0.77	0.57	0.73	9	4	7	8	2	1	3	21	1	3	0	0	1	9	12	4	1	5	13	7	2	2	3	1	Chr01
Glyma.01G095000.Wm82.a2.v1	97.77	85.45	122.48	87.76	86.54	438.62	7066.01	1631.35	7005.37	10946.2	10113.2	15883	80.02	102.41	77.95	278.23	109.63	587.97	2629.47	4251.31	5330.81	11540.5	10109.7	10664	176	201	145	113	120	855	16231	6108	17644	17051	16366	8776	107	294	363	653	253	1819	11384	12753	5715	20778	36467	10094	Chr01
Glyma.01G095100.Wm82.a2.v1	7.84	8.57	2.27	13.05	5.33	5.17	2.05	4.67	2.14	1.29	2.49	2.43	6.03	7.73	6.78	8.88	8.74	8.04	4.19	4.93	5.64	2.99	2.24	2.84	21	30	4	25	11	15	7	26	8	3	6	2	12	33	47	31	30	37	27	22	9	8	12	4	Chr01
Glyma.01G095200.Wm82.a2.v1	1.98	1.52	0	1.39	0	3.66	0	0.95	0	0	0	0	1.34	1.24	1.53	0	0	0.58	0	0	0	0	0.49	0	2	2	0	1	0	4	0	2	0	0	0	0	1	2	4	0	0	1	0	0	0	0	1	0	Chr01
Glyma.01G095500.Wm82.a2.v1	2.46	0.31	0	6.89	12.8	27.68	18.02	26.46	27.88	8.54	7.31	6.69	4.42	2.32	0.32	36.54	23.7	30.59	36.88	23.41	20.69	4.93	12.71	9.37	6	1	0	12	24	73	56	134	95	18	16	5	8	9	2	116	74	128	216	95	30	12	62	12	Chr01
Glyma.01G095700.Wm82.a2.v1	0	1.04	0	0.95	2.64	1.25	0.53	0.33	0.48	0	0	0	0	0.43	0.52	0.52	0	0	0	0	0	0	0.68	0	0	2	0	1	3	2	1	1	1	0	0	0	0	1	2	1	0	0	0	0	0	0	2	0	Chr01
Glyma.01G095800.Wm82.a2.v1	0	0	4.32	0	0	0	0.56	0	0	0.82	0	0	0	0.45	1.37	0	0	0	0	0	0	0	0	0	0	0	4	0	0	0	1	0	0	1	0	0	0	1	5	0	0	0	0	0	0	0	0	0	Chr01
Glyma.01G095900.Wm82.a2.v1	0	0	0	3.5	0	6.94	1.96	1.2	1.79	0	0	0	0	0	1.94	0	0	0	0	3.01	8.41	5.01	1.25	0	0	0	0	1	0	3	1	1	1	0	0	0	0	0	2	0	0	0	0	2	2	2	1	0	Chr01
Glyma.01G096000.Wm82.a2.v1	6.34	0.75	25.23	33.42	3.8	3.6	1.15	6.1	0.35	2.26	1.09	0	1.97	3.67	5.66	1.5	2.28	2.56	2.64	5.27	0	4.39	2.92	2.78	13	2	34	49	6	8	3	26	1	4	2	0	3	12	30	4	6	9	13	18	0	9	12	3	Chr01
Glyma.01G096200.Wm82.a2.v1	0.83	0	0	0	0	0	0	0	0	0	0	0	0	0	0	0	0	0	0	0	0	0	0	0	1	0	0	0	0	0	0	0	0	0	0	0	0	0	0	0	0	0	0	0	0	0	0	0	Chr01
Glyma.01G096300.Wm82.a2.v1	30.85	26.26	20.03	23.75	24.75	25.29	14.94	20.5	17.09	9.21	7.33	10.16	28.47	30	32.29	20.74	27.31	21.78	18.88	19.55	12.81	10.05	7.78	13.84	89	99	38	49	55	79	55	123	69	23	19	9	61	138	241	78	101	108	131	94	22	29	45	21	Chr01
Glyma.01G096600.Wm82.a2.v1	3.3	2.91	2.31	1.06	2.96	1.64	1.19	2.44	2.54	0.59	2.82	1.65	0.68	1.75	2.06	1.75	1.58	2.95	4.22	3.5	2.98	0.25	1.14	0.48	13	15	6	3	9	7	6	20	14	2	10	2	2	11	21	9	8	20	40	23	7	1	9	1	Chr01
Glyma.01G096700.Wm82.a2.v1	0.6	1.38	0.92	1.68	1.56	5	2.36	1.45	0.86	2.09	0.67	1.96	1.62	1.13	0.23	0.92	3.76	1.05	0.75	1.81	0	3.01	2.4	0	1	3	1	2	2	9	5	5	2	3	1	1	2	3	1	2	8	3	3	5	0	5	8	0	Chr01
Glyma.01G096800.Wm82.a2.v1	0	0	0	0	0	0	0.68	0.62	0.31	0.5	0	0	0	0.54	0.17	0	0.67	0.5	0.36	0	0	0	0.22	0	0	0	0	0	0	0	2	3	1	1	0	0	0	2	1	0	2	2	2	0	0	0	1	0	Chr01
Glyma.01G097000.Wm82.a2.v1	10.08	11.57	5.11	2.35	0.73	5.17	5.27	9.97	4.8	7.77	7.48	10.95	0.75	5.62	2.81	2.15	2.62	1.3	4.43	5.04	0	3.36	3.08	5.33	18	27	6	3	1	10	12	37	12	12	12	6	1	16	13	5	6	4	19	15	0	6	11	5	Chr01
Glyma.01G097100.Wm82.a2.v1	15.3	18.13	5.25	8.97	6.41	3.65	0.39	4.51	2.47	0.57	0.55	3.22	15.28	12.38	14.69	3.79	6.54	4.59	2.67	2.96	1.66	3.45	3.2	0.94	31	48	7	13	10	8	1	19	7	1	1	2	23	40	77	10	17	16	13	10	2	7	13	1	Chr01
Glyma.01G097200.Wm82.a2.v1	5.89	4.79	6.72	8.75	6.21	6.46	6.06	8.14	5	4.25	5.73	7.19	4.95	4.62	5.97	7.62	7.46	5.78	6.12	4.42	6.18	7.73	4.41	1.4	16	17	12	17	13	19	21	46	19	10	14	6	10	20	42	27	26	27	40	20	10	21	24	2	Chr01
Glyma.01G097300.Wm82.a2.v1	0	0	0	0	0	0	1.68	0	0	0	0	0	2.88	0	0	0	3.34	0	0	0	0	0	1.07	0	0	0	0	0	0	0	1	0	0	0	0	0	1	0	0	0	2	0	0	0	0	0	1	0	Chr01
Glyma.01G097400.Wm82.a2.v1	0	0	0	0	0	0	0	0	0	0.34	0	0	0	0	0	0	0	0	0	0	0	0	0	0.55	0	0	0	0	0	0	0	0	0	1	0	0	0	0	0	0	0	0	0	0	0	0	0	1	Chr01
Glyma.01G097700.Wm82.a2.v1	4.89	4.42	3.38	4.97	4.04	5.34	2.09	4.7	2.54	1.54	6.43	8.69	4.79	3.9	6.36	5.12	6.59	3.11	4.44	6.14	5.97	4.45	4.44	4.23	11	13	5	8	7	13	6	22	8	3	13	6	8	14	37	15	19	12	24	23	8	10	20	5	Chr01
Glyma.01G097900.Wm82.a2.v1	6.25	2.19	2.37	3.27	3.04	3.6	0.2	1.88	0.37	1.2	0.87	0.85	5.25	2.45	4.43	2.79	5.89	2.73	0.65	0.94	2.62	0.52	1.3	1.48	24	11	6	9	9	15	1	15	2	4	3	1	15	15	44	14	29	18	6	6	6	2	10	3	Chr01
Glyma.01G098400.Wm82.a2.v1	4.27	3.93	2.6	1.2	1.48	1.84	0.89	1.37	0.81	0	1.27	2.79	1.53	6.61	3.41	2.84	2.22	2.82	1.66	0.86	0.96	1.71	0.85	2.17	15	18	6	3	4	7	4	10	4	0	4	3	4	37	31	13	10	17	14	5	2	6	6	4	Chr01
Glyma.01G098700.Wm82.a2.v1	19.54	25.3	3.05	9.8	18.86	16.19	14.13	13.73	8.23	8.68	7.8	4.9	8.09	10.99	10.26	8.07	7.03	7.58	9.16	6.61	5.05	7.51	7	2.86	39	66	4	14	29	35	36	57	23	15	14	3	12	35	53	21	18	26	44	22	6	15	28	3	Chr01
Glyma.01G099000.Wm82.a2.v1	0.36	1.1	0	1.51	1.86	2.65	0.28	1.55	0.26	0	0.8	0	0.97	2.25	2.5	3.3	2.8	2.09	1.49	1.29	1.21	0	0.54	0	1	4	0	3	4	8	1	9	1	0	2	0	2	10	18	12	10	10	10	6	2	0	3	0	Chr01
Glyma.01G099100.Wm82.a2.v1	2.72	2.77	4.14	3.17	1.77	3.77	3.91	5.01	1.62	3.14	2.52	2.95	2.44	3.41	4.91	3.48	1.41	5.8	3.2	3.54	5.33	3.17	2.04	3.45	6	8	6	5	3	9	11	23	5	6	5	2	4	12	28	10	4	22	17	13	7	7	9	4	Chr01
Glyma.01G099200.Wm82.a2.v1	0	0.4	0	0	0	0	0	0	0	0.6	0	0	0	0.33	0.2	0	0	0	0	0	0	0	0	0	0	1	0	0	0	0	0	0	0	1	0	0	0	1	1	0	0	0	0	0	0	0	0	0	Chr01
Glyma.01G099400.Wm82.a2.v1	0	2.87	0	0	0	1.73	0	2.7	1.34	0	0	0	0	0	1.45	0	0	1.09	0.78	2.25	0	0	0	0	0	2	0	0	0	1	0	3	1	0	0	0	0	0	2	0	0	1	1	2	0	0	0	0	Chr01
Glyma.01G099600.Wm82.a2.v1	3.6	1.69	2.53	5.03	1.8	2.05	1.08	3.06	3.17	0.96	1.54	0.9	3.73	3.3	2.14	3.4	1.51	2.74	2.42	2.16	0.93	0.83	2.21	1.58	13	8	6	13	5	8	5	23	16	3	5	1	10	19	20	16	7	17	21	13	2	3	16	3	Chr01
Glyma.01G099700.Wm82.a2.v1	13.23	10.74	8.54	19.62	14.06	12.59	7.54	11.76	5.73	4.63	4.91	3.92	11.34	14.58	11.78	8.61	13.76	14.7	6.5	5.53	1.35	3.21	3.2	6.86	33	35	14	35	27	34	24	61	20	10	11	3	21	58	76	28	44	63	39	23	2	8	16	9	Chr01
Glyma.01G099800.Wm82.a2.v1	3.04	3.16	11.9	3.95	4.52	1.61	3.07	3.76	2.8	0.25	0	0	2.05	1.77	1.93	6.17	4.41	4.81	3.43	1.43	2.92	0.22	0.76	0.83	14	19	36	13	16	8	18	36	18	1	0	0	7	13	23	37	26	38	38	11	8	1	7	2	Chr01
Glyma.01G100100.Wm82.a2.v1	27.28	25.92	17.17	28.94	24.43	29.54	17.69	23.07	18.16	19.57	13.6	12.26	29.13	27.14	28.37	20.93	34.49	19.71	19.56	14.68	12.64	7.53	9.86	8.95	29	36	12	22	20	34	24	51	27	18	13	4	23	46	78	29	47	36	50	26	8	8	21	5	Chr01
Glyma.01G100200.Wm82.a2.v1	5.07	5.82	0	6.21	7.41	12.3	3.98	7.32	5.44	3.66	2.12	0	5.98	7.56	6.62	7.3	6.43	7.75	8.44	7.61	1.06	3.17	3.48	3.62	8	12	0	7	9	21	8	24	12	5	3	0	7	19	27	15	13	21	32	20	1	5	11	3	Chr01
Glyma.01G100600.Wm82.a2.v1	6.81	5.21	7.25	10.48	10.62	11.96	4.81	9.83	6.82	3.15	5.31	13.32	11.01	8.55	8.69	10.97	9.57	8.72	11.62	9.81	5.72	11.58	8.84	7.77	10	10	7	11	12	19	9	30	14	4	7	6	12	20	33	21	18	22	41	24	5	17	26	6	Chr01
Glyma.01G100900.Wm82.a2.v1	16.14	11.65	17.53	16.12	30.54	27.69	20.24	15.52	13.85	3.2	8.72	6.01	14.28	16.2	11.05	23.35	22.31	17.71	11.7	14.39	10.07	6.46	8.75	2.63	35	33	25	25	51	65	56	70	42	6	17	4	23	56	62	66	62	66	61	52	13	14	38	3	Chr01
Glyma.01G101000.Wm82.a2.v1	0.24	0.72	0.36	0.99	0.31	1.97	1.11	1.93	1.18	1.09	0.53	0	1.59	0.74	0.73	1.09	1.84	1.79	2.36	2.84	0.79	0.95	1.77	1.35	1	4	1	3	1	9	6	17	7	4	2	0	5	5	8	6	10	13	24	20	2	4	15	3	Chr01
Glyma.01G101100.Wm82.a2.v1	0	0	1.62	0.5	2.3	0	0.56	0.51	0.25	1.23	0.79	1.16	0	0	0	0	0	0.21	0	0.43	0	0	0	0	0	0	3	1	5	0	2	3	1	3	2	1	0	0	0	0	0	1	0	2	0	0	0	0	Chr01
Glyma.01G101200.Wm82.a2.v1	0	0	0	0	0	0	0	0	0	0	0	0	0	12.16	0	1.24	0	0.94	2.02	0	0	0	0	0	0	0	0	0	0	0	0	0	0	0	0	0	0	12	0	1	0	1	3	0	0	0	0	0	Chr01
Glyma.01G101800.Wm82.a2.v1	0	0	0.67	0.61	0	0.4	0.69	0.21	0	0	0.49	0	0	0	0	0.67	0	0	0	0	0	0	0.87	0.83	0	0	1	1	0	1	2	1	0	0	1	0	0	0	0	2	0	0	0	0	0	0	4	1	Chr01
Glyma.01G102200.Wm82.a2.v1	0	0	0.49	0	0	0	0	0	0	0	0	0	0	0.2	0.13	0.25	0	0	0	0	0	0	0	0	0	0	1	0	0	0	0	0	0	0	0	0	0	1	1	1	0	0	0	0	0	0	0	0	Chr01
Glyma.01G102300.Wm82.a2.v1	0.49	0.37	11.09	0	0	0	0	0	0	0	0	0	0	0.91	0	0	0	0	0	0.29	0	0.49	0	0	1	1	15	0	0	0	0	0	0	0	0	0	0	3	0	0	0	0	0	1	0	1	0	0	Chr01
Glyma.01G102400.Wm82.a2.v1	11.86	12.28	13.79	7.8	8.15	12.24	3.83	9.73	3.99	5.64	6.21	0	14.09	9.19	11.59	9.1	4.35	7.71	8.41	6.7	5.86	7.67	3.83	2.65	17	23	13	8	9	19	7	29	8	7	8	0	15	21	43	17	8	19	29	16	5	11	11	2	Chr01
Glyma.01G102500.Wm82.a2.v1	0.77	0.59	0	0	0	0	0	0	0	0	0	2.5	0	0	0	0	0	0	0	0	0	0	0	0	1	1	0	0	0	0	0	0	0	0	0	1	0	0	0	0	0	0	0	0	0	0	0	0	Chr01
Glyma.01G102600.Wm82.a2.v1	30.8	25.28	30.54	65.52	77.65	50.7	12.59	23.61	13.72	7.74	4.47	10.18	26.44	20.99	21.22	47.25	76.6	42.34	29.7	20.63	23.23	8.48	11.14	9.34	69	74	45	105	134	123	36	110	43	15	9	7	44	75	123	138	220	163	160	77	31	19	50	11	Chr01
Glyma.01G102800.Wm82.a2.v1	2.44	9.97	4.95	10.25	6.34	10.53	4.47	7.44	5.24	0	2.72	2.65	5.48	3.58	2.83	6.87	10.16	6.63	9.14	2.93	4.1	0	4.88	4.65	3	16	4	9	6	14	7	19	9	0	3	1	5	7	9	11	16	14	27	6	3	0	12	3	Chr01
Glyma.01G102900.Wm82.a2.v1	1.08	0.83	0	2.01	1.4	0.33	1.13	1.56	0.51	1.67	0.8	1.17	0	0	0.56	3.32	2.53	0.63	0.9	1.08	1.21	0.36	1.26	0	3	3	0	4	3	1	4	9	2	4	2	1	0	0	4	12	9	3	6	5	2	1	7	0	Chr01
Glyma.01G103100.Wm82.a2.v1	5.26	6.71	1.33	7.35	3.41	2.43	2.4	2.11	0.63	0	0.97	0	8.85	7.42	7.11	5.71	4.44	3.31	2.37	2.63	2.21	2.63	1.09	0	12	20	2	12	6	6	7	10	2	0	2	0	15	27	42	17	13	13	13	10	3	6	5	0	Chr01
Glyma.01G103200.Wm82.a2.v1	6.48	8.17	5.8	6.93	6.44	9.16	2.69	5.5	4.63	3.97	3.82	0	7.7	7.18	8.99	8.48	6.84	6.88	4.28	3.66	1.92	4.96	4	2.18	17	28	10	13	13	26	9	30	17	9	9	0	15	30	61	29	23	31	27	16	3	13	21	3	Chr01
Glyma.01G103500.Wm82.a2.v1	2.87	6.59	2.91	5.02	4.35	9.28	1.12	5.63	5.13	1.66	1.33	3.12	3.22	4.65	3.33	5.87	7.84	8.49	5.07	3.88	3.61	2.15	1.79	3.64	12	36	8	15	14	42	6	49	30	6	5	4	10	31	36	32	42	61	51	27	9	9	15	8	Chr01
Glyma.01G104000.Wm82.a2.v1	0	0	0	0	0	0	0	0	1.02	0	0	0	0	0	0	0	0	0	0	0	0	0	0	0	0	0	0	0	0	0	0	0	1	0	0	0	0	0	0	0	0	0	0	0	0	0	0	0	Chr01
Glyma.01G104100.Wm82.a2.v1	0.38	0	0	2.13	0.49	1.06	0	2.38	0.82	0	0	1.24	0	0.72	0.44	0.88	0.3	1.11	1.11	1.37	1.28	0.38	0.57	1.45	1	0	0	4	1	3	0	13	3	0	0	1	0	3	3	3	1	5	7	6	2	1	3	2	Chr01
Glyma.01G104200.Wm82.a2.v1	4.82	2.67	10.6	1.5	0	1.24	0.63	1.03	0.77	0	0	0	4.69	4.71	9.12	0.62	1.25	1.09	1	0.64	0.9	1.07	0.13	1.53	18	13	26	4	0	5	3	8	4	0	0	0	13	28	88	3	6	7	9	4	2	4	1	3	Chr01
Glyma.01G104600.Wm82.a2.v1	0	0.91	0.72	1.66	1.85	3.07	0	1.03	0.51	0	0	0	0.64	0.74	0.46	1.27	2.59	1.66	0.69	0.14	0.8	0.47	0.24	0	0	5	2	5	6	14	0	9	3	0	0	0	2	5	5	7	14	12	7	1	2	2	2	0	Chr01
Glyma.01G104800.Wm82.a2.v1	31.76	16.05	22.04	9.91	7.61	7.97	14.5	9.19	10.58	12.47	13.03	34.15	36.94	25.33	41.83	8.04	7.22	8.25	9.23	7.96	10.35	15.72	15.85	9.38	103	68	47	23	19	28	60	62	48	35	38	34	89	131	351	34	30	46	72	43	20	51	103	16	Chr01
Glyma.01G105000.Wm82.a2.v1	3.49	1.87	18.56	0.49	2.26	0.64	0.27	1.01	0	0	1.16	0	2.35	1.09	0.67	0.8	1.9	0.81	0.29	0.42	1.17	0.35	0	0	10	7	35	1	5	2	1	6	0	0	3	0	5	5	5	3	7	4	2	2	2	1	0	0	Chr01
Glyma.01G105100.Wm82.a2.v1	1.43	1.09	0	0	1.86	0	0	1.38	0	0	0	0	0	0	0	0	0	0.83	0.59	0	0	0	0	0	1	1	0	0	1	0	0	2	0	0	0	0	0	0	0	0	0	1	1	0	0	0	0	0	Chr01
Glyma.01G105200.Wm82.a2.v1	0	0	0	0	1.89	0	0	0.7	0	0	4.87	0	0	0	0	0	0	0.85	0	0	0	0	1.46	0	0	0	0	0	1	0	0	1	0	0	3	0	0	0	0	0	0	1	0	0	0	0	2	0	Chr01
Glyma.01G105300.Wm82.a2.v1	0	0	1.53	0	0	0	0	0	0	0	0	0	0	0	0	0	0	0	0	0	0	0	0	0	0	0	1	0	0	0	0	0	0	0	0	0	0	0	0	0	0	0	0	0	0	0	0	0	Chr01
Glyma.01G105400.Wm82.a2.v1	2.05	2.35	6.23	11.46	9.31	2.84	1.61	2.46	0.73	0	0	0	0	0	3.96	2.36	4.8	2.39	0.43	1.85	0	3.07	0	1.95	2	3	4	8	7	3	2	5	1	0	0	0	0	0	10	3	6	4	1	3	0	3	0	1	Chr01
Glyma.01G105500.Wm82.a2.v1	31.34	34.74	34.51	55.9	30.87	37.43	31.34	45.21	27.81	17.49	18.03	21.13	43.65	32.87	32.17	58.44	54.37	42.76	32.58	34.7	36.29	16.75	21.84	14.39	58	84	42	74	44	75	74	174	72	28	30	12	60	97	154	141	129	136	145	107	40	31	81	14	Chr01
Glyma.01G105600.Wm82.a2.v1	1.81	0.69	8.27	53.2	20.58	10.88	4.26	8.28	2.27	2.09	4.03	5.9	0	0.85	0.53	9.38	15.55	9.49	5.84	5.44	4.56	2.72	4.97	0.86	4	2	12	84	35	26	12	38	7	4	8	4	0	3	3	27	44	36	31	20	6	6	22	1	Chr01
Glyma.01G105900.Wm82.a2.v1	1.28	2.94	0	0.71	0.66	0.94	0	0.98	0.73	0	0	0	1.03	0.96	2.17	1.18	0.6	0.6	0.53	0.15	0	0	0.13	0	5	15	0	2	2	4	0	8	4	0	0	0	3	6	22	6	3	4	5	1	0	0	1	0	Chr01
Glyma.01G106000.Wm82.a2.v1	12.21	14.79	7.73	10.66	12.54	21.6	11.96	21.76	13.08	2.94	4.53	3.31	8.9	17.54	11.6	34.33	30.15	20.12	16.49	11.9	8.54	5.59	3.05	4.84	24	38	10	15	19	46	30	89	36	5	8	2	13	55	59	88	76	68	78	39	10	11	12	5	Chr01
Glyma.01G106100.Wm82.a2.v1	9.82	9.02	0	68.64	61.19	68.92	9.75	78.37	4.21	0	0.73	0	15.86	11.9	9.36	88.37	76.08	84.18	91.18	12.18	3.3	0	0.65	1.24	15	18	0	75	72	114	19	249	9	0	1	0	18	29	37	176	149	221	335	31	3	0	2	1	Chr01
Glyma.01G106200.Wm82.a2.v1	170.26	89.85	139.48	159.02	163.87	128.76	60.96	138.3	78.15	72.08	56.32	86.07	163	143.11	204.8	169.42	174.59	164.39	85.13	81.47	125.68	72.64	100.71	94.9	232	160	125	155	172	190	106	392	149	85	69	36	165	311	722	301	305	385	279	185	102	99	275	68	Chr01
Glyma.01G106300.Wm82.a2.v1	0	0	0	5.26	1.95	2.78	0	3.62	4.3	2.61	1.67	0	0	0	0	2.89	3.52	0.88	1.88	2.26	0	0	0	0	0	0	0	5	2	4	0	10	8	3	2	0	0	0	0	5	6	2	6	5	0	0	0	0	Chr01
Glyma.01G106500.Wm82.a2.v1	4.51	1.44	0	15.23	9.76	10.06	3.83	9.57	2.95	1.74	2.09	0	2.02	5.65	2.61	6.34	9.97	8.31	5	2.93	1.26	0.75	2.44	1.43	12	5	0	29	20	29	13	53	11	4	5	0	4	24	18	22	34	38	32	13	2	2	13	2	Chr01
Glyma.01G106600.Wm82.a2.v1	3.34	5.31	1.95	3.23	3.67	4.27	1.41	4.08	2.2	0.89	0.57	2.51	2.77	3.22	3.18	5.32	4.61	3.89	3.1	2.62	2.16	1.54	2.56	1.47	13	27	5	9	11	18	7	33	12	3	2	3	8	20	32	27	23	26	29	17	5	6	20	3	Chr01
Glyma.01G106700.Wm82.a2.v1	8.56	7.49	9.3	8.55	14.29	10.17	5.75	8.23	2.62	1.41	4.08	0	3.29	7.67	8.51	6.57	2.86	2.85	2.54	0.73	2.05	1.22	2.44	9.3	7	8	5	5	9	9	6	14	3	1	3	0	2	10	18	7	3	4	5	1	1	1	4	4	Chr01
Glyma.01G106800.Wm82.a2.v1	1.69	0.64	0	0	0	0	0	0	0	0	0	0	0	0	1.63	0	0.66	0	0	0	0	0	0	0	2	1	0	0	0	0	0	0	0	0	0	0	0	0	5	0	1	0	0	0	0	0	0	0	Chr01
Glyma.01G107000.Wm82.a2.v1	0.38	0.44	0	0.81	1.25	0	0.45	0.37	0.14	0.44	0.21	0	0.52	0.97	0.45	0.59	0.3	0.78	0.56	0.35	0.65	0.38	0.29	0.73	2	3	0	3	5	0	3	4	1	2	1	0	2	8	6	4	2	7	7	3	2	2	3	2	Chr01
Glyma.01G107100.Wm82.a2.v1	6.75	2.22	1.47	2.7	5.01	7.13	3.78	6.5	5.52	5.02	2.68	1.57	6.5	2.72	4.48	8.51	7.53	7.58	3.61	6.08	4.05	2.89	2.17	3.67	14	6	2	4	8	16	10	28	16	9	5	1	10	9	24	23	20	27	18	21	5	6	9	4	Chr01
Glyma.01G107500.Wm82.a2.v1	3.31	6.15	2.87	6.61	7.36	5.67	2.96	4.09	4.39	3.28	3.68	4.62	3.82	4.74	3.29	3.99	8.11	5.77	6.09	3.97	6.35	3.31	3.77	2.7	7	17	4	10	12	13	8	18	13	6	7	3	6	16	18	11	22	21	31	14	8	7	16	3	Chr01
Glyma.01G107700.Wm82.a2.v1	1.71	0.33	0.65	1.79	0	1.18	0	0.82	0	0	0	0	0.57	0.27	1.48	0.65	0	0.5	0.18	0	0	0	0.21	0	4	1	1	3	0	3	0	4	0	0	0	0	1	1	9	2	0	2	1	0	0	0	1	0	Chr01
Glyma.01G108000.Wm82.a2.v1	3.11	2.97	3.54	3.26	14.11	10.4	3.96	5.97	3.61	0.9	0.86	1.26	2.09	2.19	2.7	7.74	7.87	7.23	3.39	2.8	4.56	2.33	1.55	1.48	8	10	6	6	28	29	13	32	13	2	2	1	4	9	18	26	26	32	21	12	7	6	8	2	Chr01
Glyma.01G108200.Wm82.a2.v1	0	0	0	0	0	0	0	0	0	0	0	0	0	0	0.44	0	0	0	0	0	0	0	0	0	0	0	0	0	0	0	0	0	0	0	0	0	0	0	3	0	0	0	0	0	0	0	0	0	Chr01
Glyma.01G108700.Wm82.a2.v1	21.62	21.06	66.75	4.58	5.1	12.71	2.05	11.34	2.81	0	2.92	0	20.29	24.24	28.11	19.1	24.53	10.67	3	1.57	2.2	1.31	3.92	0	33	42	67	5	6	21	4	36	6	0	4	0	23	59	111	38	48	28	11	4	2	2	12	0	Chr01
Glyma.01G108800.Wm82.a2.v1	0	0	0	0	0	0	0	0.22	0	0	0	0	0	0	0	0	0	0	0	0	0	0	0	0	0	0	0	0	0	0	0	1	0	0	0	0	0	0	0	0	0	0	0	0	0	0	0	0	Chr01
Glyma.01G109100.Wm82.a2.v1	6.91	6.7	8.41	9.67	10.77	9.36	3.25	8.42	4.94	4.26	3.08	3	3.72	6.36	4.63	4.95	2.88	6.44	4.02	2.49	3.87	5.07	2.99	2.63	15	19	12	15	18	22	9	38	15	8	6	2	6	22	26	14	8	24	21	9	5	11	13	3	Chr01
Glyma.01G109200.Wm82.a2.v1	10.69	7.87	5.63	5.75	12.28	6.07	5.8	8.89	5	3.33	2.74	1.34	8.3	8.25	10.81	8.2	8.98	7.42	8.21	3.21	6.9	1.64	3.08	2.35	26	25	9	10	23	16	18	45	17	7	6	1	15	32	68	26	28	31	48	13	10	4	15	3	Chr01
Glyma.01G109300.Wm82.a2.v1	159.46	144.36	44.38	145.46	208.66	248.81	79.55	123.44	84.04	30.3	27.76	34.45	152.6	158.07	145.02	266.67	286.37	164.15	97.96	90.87	120.02	39.33	38.21	41.83	377	446	69	246	380	637	240	607	278	62	59	25	268	596	887	822	868	667	557	358	169	93	181	52	Chr01
Glyma.01G109500.Wm82.a2.v1	11.53	5.52	18.63	17.13	13.1	9.32	15.82	11.09	16.49	14.16	16.84	16.44	15.53	4.97	6.41	8.29	15.18	12.16	5.99	11.68	12.1	16.58	21.58	9.6	16	10	17	17	14	14	28	32	32	17	21	7	16	11	23	15	27	29	20	27	10	23	60	7	Chr01
Glyma.01G109600.Wm82.a2.v1	22.07	13.51	13.42	18.51	31.52	39.74	40.65	49.87	46.53	51.01	51.56	25.17	11.88	16.61	20.47	37.24	18.08	39.17	34.87	27.81	31.5	29.79	30.84	12.59	20	16	8	12	22	39	47	94	59	40	42	7	8	24	48	44	21	61	76	42	17	27	56	6	Chr01
Glyma.01G109700.Wm82.a2.v1	7.08	9.32	4.18	3.3	2.55	5.44	1.85	3.78	1.69	0	0.87	3.84	3.17	3.7	2.13	4.52	4.6	3.43	1.31	0.71	0	0.39	0.59	2.24	18	31	7	6	5	15	6	20	6	0	2	3	6	15	14	15	15	15	8	3	0	1	3	3	Chr01
Glyma.01G109800.Wm82.a2.v1	0.51	0.19	0	0.36	0.66	0	0.4	0.86	0.18	0	0	0	0	0.16	0.2	0.2	0.4	0.3	0.21	0	0	0.25	0.38	0	2	1	0	1	2	0	2	7	1	0	0	0	0	1	2	1	2	2	2	0	0	1	3	0	Chr01
Glyma.01G110100.Wm82.a2.v1	0.64	1.23	0.49	0	0	1.19	0.25	0.62	0.69	0	0.36	1.05	0.43	1.01	0.87	0.99	0.25	1.68	2.27	2.12	3.78	0.64	1.28	0.61	2	5	1	0	0	4	1	4	3	0	1	1	1	5	7	4	1	9	17	11	7	2	8	1	Chr01
Glyma.01G110200.Wm82.a2.v1	10.75	3.95	0.65	1.2	6.14	3.18	3.37	3.72	4	0.99	2.87	1.4	6.95	10.52	8.98	2.31	6.38	7.26	4.65	3.87	2.89	3.01	3.22	0.82	25	12	1	2	11	8	10	18	13	2	6	1	12	39	54	7	19	29	26	15	4	7	15	1	Chr01
Glyma.01G110300.Wm82.a2.v1	0	0	0	2.02	1.25	0.44	0	1.62	0.34	0	0	0	0	0.6	0	1.48	1.5	1.68	0.4	0	0	0	0.24	0	0	0	0	3	2	1	0	7	1	0	0	0	0	2	0	4	4	6	2	0	0	0	1	0	Chr01
Glyma.01G110400.Wm82.a2.v1	1.33	0.34	2.02	9.91	6.33	9.41	5.9	10.65	3.8	1.02	2.46	1.44	0.6	1.95	0.86	9.18	4.84	7.48	6.63	5.05	3.72	3.1	2.43	3.37	3	1	3	16	11	23	17	50	12	2	5	1	1	7	5	27	14	29	36	19	5	7	11	4	Chr01
Glyma.01G110500.Wm82.a2.v1	3.58	6.85	5.44	3.13	2.9	1.65	2.1	4.3	2.88	2.07	1	1.46	4.82	7.3	8.13	3.43	1.05	2.6	1.86	1.61	0.75	0.45	0.45	1.7	8	20	8	5	5	4	6	20	9	4	2	1	8	26	47	10	3	10	10	6	1	1	2	2	Chr01
Glyma.01G110800.Wm82.a2.v1	0	0.42	0.84	0	2.15	0	0.43	0.53	0.4	0	0	0	0	0	0	0.85	0.43	0	0	0	0	0	0	0	0	1	1	0	3	0	1	2	1	0	0	0	0	0	0	2	1	0	0	0	0	0	0	0	Chr01
Glyma.01G110900.Wm82.a2.v1	19.25	11.5	18.56	31.51	34.74	33.82	20.24	22.57	30.2	15.73	17.23	16.83	13.27	13.25	15.24	32.41	28.57	23.49	19.33	12.96	17.34	15.96	17.57	14.29	41	32	26	48	57	78	55	100	90	29	33	11	21	45	84	90	78	86	99	46	22	34	75	16	Chr01
Glyma.01G111200.Wm82.a2.v1	4.68	3.58	4.95	6.26	4.76	6.96	2.71	4.8	3.2	1.18	2.04	0	4.39	3.06	4.01	2.65	5.24	3.55	4.23	3.3	5.81	2.44	2.03	1.16	23	23	16	22	18	37	17	49	22	5	9	0	16	24	51	17	33	30	50	27	17	12	20	3	Chr01
Glyma.01G111300.Wm82.a2.v1	7.82	6.15	9.25	10.32	9.59	9.83	5.96	9.5	7.3	4.02	1.69	6.37	10.82	8.31	8.48	9.49	10.67	7.71	7.4	7.56	8.39	4.78	5.42	8.67	36	37	28	34	34	49	35	91	47	16	7	9	37	61	101	57	63	61	82	58	23	22	50	21	Chr01
Glyma.01G111500.Wm82.a2.v1	2.34	3.23	0.71	0.66	0.61	3.9	1.47	2.25	1.01	0.54	1.56	0	3.79	2.94	3.99	2.88	2.56	2.18	2.53	1.13	0	0.47	0	0	5	9	1	1	1	9	4	10	3	1	3	0	6	10	22	8	7	8	13	4	0	1	0	0	Chr01
Glyma.01G111900.Wm82.a2.v1	10.82	9.49	1.93	4.45	7.85	5.58	1.25	3.67	2.73	0.74	1.42	3.11	3.43	8.98	5.9	8.54	4.47	5	2.51	2.1	1.07	0.32	2.7	2.42	34	39	4	10	19	19	5	24	12	2	4	3	8	45	48	35	18	27	19	11	2	1	17	4	Chr01
Glyma.01G112200.Wm82.a2.v1	0.18	0.55	0	0.25	0.23	0.17	0	0.09	0	0	0	0	0	0	0.14	0.14	0	0	0.07	0	0	0	0	0	1	4	0	1	1	1	0	1	0	0	0	0	0	0	2	1	0	0	1	0	0	0	0	0	Chr01
Glyma.01G112300.Wm82.a2.v1	0	0.26	0.25	0	0	0	0	0.08	0.24	0.19	0.19	0.55	0	0.1	0.26	0	0.13	0.1	0	0	0	0	0	0	0	2	1	0	0	0	0	1	2	1	1	1	0	1	4	0	1	1	0	0	0	0	0	0	Chr01
Glyma.01G112600.Wm82.a2.v1	3.38	0.94	1.4	0.86	0.4	0.57	0.24	0.59	0.44	0	0	0	0	5	2.85	0	0.24	0.18	0.26	0.37	1.55	0	0	0	11	4	3	2	1	2	1	4	2	0	0	0	0	26	24	0	1	1	2	2	3	0	0	0	Chr01
Glyma.01G112700.Wm82.a2.v1	1.22	1.25	0	1.71	2.11	0.38	0	0.78	0.29	0	0	0	0	0	0.63	1.25	0.32	0.47	0.17	0.24	0	0	0.2	0	3	4	0	3	4	1	0	4	1	0	0	0	0	0	4	4	1	2	1	1	0	0	1	0	Chr01
Glyma.01G112900.Wm82.a2.v1	5.64	8.87	8.1	6.57	6.1	3.76	2.95	5.27	1.34	0.36	2.09	3.06	14.34	12.77	13.93	6.01	8.07	2.92	2.08	0.75	3.68	1.57	0.94	0.6	18	37	17	15	15	13	12	35	6	1	6	3	34	65	115	25	33	16	16	4	7	5	6	1	Chr01
Glyma.01G113000.Wm82.a2.v1	22.21	21.63	12.79	17.87	18.35	10.56	5.54	7.93	6.49	4.67	2.25	1.1	28.99	24.05	29.39	11.61	13.12	7.44	5.46	6.46	5.08	1.35	2.52	3.2	66	84	25	38	42	34	21	49	27	12	6	1	64	114	226	45	50	38	39	32	9	4	15	5	Chr01
Glyma.01G113100.Wm82.a2.v1	0.67	1.54	0	0	0	0.62	0	0	0.48	0	0	0	1.8	1.68	2.59	0.51	0	1.56	0	0	1.12	0	0.33	0	1	3	0	0	0	1	0	0	1	0	0	0	2	4	10	1	0	4	0	0	1	0	1	0	Chr01
Glyma.01G113200.Wm82.a2.v1	4.77	4.25	7.25	0.56	0	0	0.31	0	0	0	0	0	6.95	7.47	8.44	0	0	0	0.17	0.24	0	0	0	0	12	14	12	1	0	0	1	0	0	0	0	0	13	30	55	0	0	0	1	1	0	0	0	0	Chr01
Glyma.01G113400.Wm82.a2.v1	0	0	0	0	0	0	0	0	0	0	0	0	0	0	0	0.36	0	0	0	0	0	0	0	0	0	0	0	0	0	0	0	0	0	0	0	0	0	0	0	1	0	0	0	0	0	0	0	0	Chr01
Glyma.01G114000.Wm82.a2.v1	0	0	0	0	0	0	0	0	0	0	0	0	0	0.6	0.49	0	0	0	0	0	0	0	0	0	0	0	0	0	0	0	0	0	0	0	0	0	0	3	4	0	0	0	0	0	0	0	0	0	Chr01
Glyma.01G114300.Wm82.a2.v1	0	0	0	0	0	0	0	0	0	0	0	0	0	0	0.84	0	0	0	0.45	0	0	0	0	0	0	0	0	0	0	0	0	0	0	0	0	0	0	0	2	0	0	0	1	0	0	0	0	0	Chr01
Glyma.01G114400.Wm82.a2.v1	0	0	0.95	0	0	0	0	0	0.67	0	0	0	0.42	0.2	0.36	0	0	0.18	0	0	0	0	0.31	0	0	0	2	0	0	0	0	0	3	0	0	0	1	1	3	0	0	1	0	0	0	0	2	0	Chr01
Glyma.01G114800.Wm82.a2.v1	77.67	89.15	77.22	82.13	63.34	93.79	43.7	56.01	52.66	31.07	39.87	9.73	57.64	64.31	60.81	73.32	62.13	70.1	43.88	40.03	45.14	24.89	31.8	18.94	78	117	51	59	49	102	56	117	74	27	36	3	43	103	158	96	80	121	106	67	27	25	64	10	Chr01
Glyma.01G115000.Wm82.a2.v1	1.9	1.45	3.37	9.73	11.5	10.22	18.1	19.16	20.57	12.06	12.31	10.31	1.28	2.58	1.34	15.28	13.08	15.46	20.78	20.5	35.05	25.3	22.26	22.26	6	6	7	22	28	35	73	126	91	33	35	10	3	13	11	63	53	84	158	108	66	80	141	37	Chr01
Glyma.01G115100.Wm82.a2.v1	0	0	0	0	0	0	0	0	0	0	0	0	8.82	6.68	7.6	4.4	7.03	6.2	3.75	7.37	1.38	2.46	4.09	0	0	0	0	0	0	0	0	0	0	0	0	0	8	13	24	7	11	13	11	15	1	3	10	0	Chr01
Glyma.01G115500.Wm82.a2.v1	2.44	3.27	0.93	0	0	0	0	0.29	0	0	0	0	0	8.8	3.07	0	0	0	0	0	0	0	0	0	4	7	1	0	0	0	0	1	0	0	0	0	0	23	13	0	0	0	0	0	0	0	0	0	Chr01
Glyma.01G115600.Wm82.a2.v1	0.71	2.17	1.61	0.49	0	0.65	0	0.34	0.76	0	0	0	4.28	4.66	3.69	0.81	0.55	0	0.44	0	0	0	0	0	2	8	3	1	0	2	0	2	3	0	0	0	9	21	27	3	2	0	3	0	0	0	0	0	Chr01
Glyma.01G115700.Wm82.a2.v1	1.22	1.55	0	0	0	0	0	0	0	0	0	0	0.55	0.51	0.16	0	0.32	0	0	0	0	0	0	0	3	5	0	0	0	0	0	0	0	0	0	0	1	2	1	0	1	0	0	0	0	0	0	0	Chr01
Glyma.01G115900.Wm82.a2.v1	301.21	256.11	207.24	81.37	79.34	180.5	96.16	135.95	115.09	102.57	124.63	97.97	206.33	165.15	248.79	155.5	125.61	213.08	164.36	131.85	127.05	92.14	105.53	115.3	621	690	281	120	126	403	253	583	332	183	231	62	316	543	1327	418	332	755	815	453	156	190	436	125	Chr01
Glyma.01G116000.Wm82.a2.v1	115.57	122.55	125.3	140.56	164.84	107.68	52.39	98.92	55.93	34.74	37.47	37.14	120	117.31	92.75	148.27	130.98	90.47	66.8	51	40.03	50.26	47.33	44.35	223	309	159	194	245	225	129	397	151	58	65	22	172	361	463	373	324	300	310	164	46	97	183	45	Chr01
Glyma.01G116100.Wm82.a2.v1	4.48	5.39	5.84	5.37	5.82	7.69	2.51	6.16	3.2	2.22	2.85	6.26	4.31	3.21	2.72	3.93	3.5	3.35	2.13	2.69	4.3	0.64	1.28	0	7	11	6	6	7	13	5	20	7	3	4	3	5	8	11	8	7	9	8	7	4	1	4	0	Chr01
Glyma.01G116300.Wm82.a2.v1	0.4	0.31	1.23	0.57	0	0.75	0	0.19	0	0	0	2.64	0	0.25	0.47	0.31	0.32	0.47	0.5	0.24	0	0	0.2	1.54	1	1	2	1	0	2	0	1	0	0	0	2	0	1	3	1	1	2	3	1	0	0	1	2	Chr01
Glyma.01G116400.Wm82.a2.v1	0	0	0	0	0	0	0	0	0	0	0	0	0	0	0	0	0	0	0.78	0	0	0	0	0	0	0	0	0	0	0	0	0	0	0	0	0	0	0	0	0	0	0	1	0	0	0	0	0	Chr01
Glyma.01G116700.Wm82.a2.v1	0	0	0	0	0	0	0	0	0	0	0.49	0	0	0	0	0	0	0	0.37	0.27	0	0	0.22	0	0	0	0	0	0	0	0	0	0	0	1	0	0	0	0	0	0	0	2	1	0	0	1	0	Chr01
Glyma.01G117000.Wm82.a2.v1	0	0	0	0	0	0	0	0.28	0.28	0.23	0	0	0	0	0	0	0	0	0	0.12	0	0	0.1	0	0	0	0	0	0	0	0	3	2	1	0	0	0	0	0	0	0	0	0	1	0	0	1	0	Chr01
Glyma.01G117200.Wm82.a2.v1	0	0	0	0	0	0	0	0.1	0	0	0	0	0	0	0	0	0	0	0.08	0.12	0	0	0	0	0	0	0	0	0	0	0	1	0	0	0	0	0	0	0	0	0	0	1	1	0	0	0	0	Chr01
Glyma.01G117800.Wm82.a2.v1	5.7	12.26	5.78	8.35	7.05	4.51	3.19	6.53	4.85	1.88	1.81	6.19	3.66	9.54	5.67	8.33	6.78	6.01	6.1	5.38	3.65	4.62	3.8	2.58	21	59	14	22	20	18	15	50	25	6	6	7	10	56	54	40	32	38	54	33	8	17	28	5	Chr01
Glyma.01G117900.Wm82.a2.v1	0.45	0.23	1.84	0	0	0	0	0.29	0.54	0	0	0	1.02	0.47	0.41	0.12	0.12	0.53	0.13	0.09	0	0.15	0.08	0	3	2	8	0	0	0	0	4	5	0	0	0	5	5	7	1	1	6	2	1	0	1	1	0	Chr01
Glyma.01G118000.Wm82.a2.v1	0	0.74	0	6.28	6.25	7.41	4.03	0.93	0.46	1.11	2.14	1.05	0	0	0	0.98	4.51	2.43	0.8	0.39	0.54	1.28	0.8	0	0	3	0	14	15	25	16	6	2	3	6	1	0	0	0	4	18	13	6	2	1	4	5	0	Chr01
Glyma.01G118200.Wm82.a2.v1	9.47	4.48	1.37	6.3	9.36	7.91	2.12	6.72	4.19	1.04	2.01	0	1.82	8.2	8.36	4.49	5.27	5.77	4.31	3.25	6.06	1.8	1.35	2.57	21	13	2	10	16	19	6	31	13	2	4	0	3	29	48	13	15	22	23	12	8	4	6	3	Chr01
Glyma.01G118300.Wm82.a2.v1	0	1.14	1.13	1.56	0.48	1.38	0.88	0.54	0.53	0.86	1.24	0	0.5	0.47	0.43	1.14	0.87	0	0.78	0.22	0	0.37	0	0	0	4	2	3	1	4	3	3	2	2	3	0	1	2	3	4	3	0	5	1	0	1	0	0	Chr01
Glyma.01G118400.Wm82.a2.v1	0	0	0	0	0.32	0	0	0.24	0.35	0	0	0	0	0	0.1	0.57	0	0	0.1	0	0	0	0	0	0	0	0	0	1	0	0	2	2	0	0	0	0	0	1	3	0	0	1	0	0	0	0	0	Chr01
Glyma.01G118600.Wm82.a2.v1	0	1.07	0	0	0	0	0	0.67	0	0	0	0	0	0	0	0	0	0	0	0	0	0	0	0	0	1	0	0	0	0	0	1	0	0	0	0	0	0	0	0	0	0	0	0	0	0	0	0	Chr01
Glyma.01G118900.Wm82.a2.v1	12.01	10.19	8.96	3.66	4.82	3.83	2.74	6.82	3.43	1.26	1.46	2.85	15.28	12.19	10.47	4.69	4.77	5.21	5.08	3.28	4.4	3.93	2.07	6.64	55	61	27	12	17	19	16	65	22	5	6	4	52	89	124	28	28	41	56	25	12	18	19	16	Chr01
Glyma.01G119000.Wm82.a2.v1	0.58	1.32	0.88	0.8	2.24	0.53	1.35	0	0	0.67	0.64	0	0	0.36	0.44	0	0	0.33	0	0.69	0	0	0	0	1	3	1	1	3	1	3	0	0	1	1	0	0	1	2	0	0	1	0	2	0	0	0	0	Chr01
Glyma.01G119300.Wm82.a2.v1	3.02	4.16	2.75	0.84	2.35	3.9	7.57	4.93	5.18	6.28	7.38	7.86	0	2.27	3.97	0.46	0.47	1.05	2.51	1.81	5.07	4.83	2.41	1.15	5	9	3	1	3	7	16	17	12	9	11	4	0	6	17	1	1	3	10	5	5	8	8	1	Chr01
Glyma.01G119400.Wm82.a2.v1	24.15	21.72	28.99	43.24	46.21	30.13	29.22	27.91	35.13	11.75	14.14	28.99	29.09	17.8	20.8	56.55	45.28	38.71	28.36	26.7	56.2	11.86	24.95	26.59	57	67	45	73	84	77	88	137	116	24	30	21	51	67	127	174	137	157	161	105	79	28	118	33	Chr01
Glyma.01G119500.Wm82.a2.v1	8.85	7.12	11.04	33.95	24.46	18.24	7.29	21.94	8.6	5.25	3.79	1.48	3.67	2.28	3.95	16.37	14.7	8.85	8.4	4.09	5.34	2.95	3.62	7.34	39	41	32	107	83	87	41	201	53	20	15	2	12	16	45	94	83	67	89	30	14	13	32	17	Chr01
Glyma.01G119600.Wm82.a2.v1	0	0	0	1.31	0	0	0	0.45	1.34	0	2.09	0	0	0	0	0.72	0.73	1.64	0.78	1.12	0	0.94	1.4	0	0	0	0	1	0	0	0	1	2	0	2	0	0	0	0	1	1	3	2	2	0	1	3	0	Chr01
Glyma.01G119900.Wm82.a2.v1	11.07	10.26	7.98	7.33	10.59	12.92	8.22	7.57	5	6.06	9.73	0	8.63	10.23	7.66	8.94	10.91	7.8	8	10.14	3.91	2.33	4.65	1.11	19	23	9	9	14	24	18	27	12	9	15	0	11	28	34	20	24	23	33	29	4	4	16	1	Chr01
Glyma.01G120000.Wm82.a2.v1	0	0	0	0	0	0	0	0	0	0	0	0	0	0.12	0	0	0	0	0	0	0	0	0	0	0	0	0	0	0	0	0	0	0	0	0	0	0	1	0	0	0	0	0	0	0	0	0	0	Chr01
Glyma.01G120300.Wm82.a2.v1	0	0	0	0	0	0	0	0	0	0	0	0	0	0	0.14	0	0	0	0	0	0	0	0	0	0	0	0	0	0	0	0	0	0	0	0	0	0	0	2	0	0	0	0	0	0	0	0	0	Chr01
Glyma.01G120400.Wm82.a2.v1	9.16	7.89	3.05	5.2	8.92	5.29	4.26	4.96	3.68	2.32	2.23	0.93	7.32	5.03	6.31	8.35	4.02	4.83	4.64	3.44	3.37	2.29	2.57	1.09	32	36	7	13	24	20	19	36	18	7	7	1	19	28	57	38	18	29	39	20	7	8	18	2	Chr01
Glyma.01G120800.Wm82.a2.v1	0	0.34	0	3.78	4.1	0.42	4.59	1.95	0.64	1.56	1	4.41	0	0.28	0.52	0.69	1.05	1.05	1.5	1.35	3.78	0.9	1.57	0	0	1	0	6	7	1	13	9	2	3	2	3	0	1	3	2	3	4	8	5	5	2	7	0	Chr01
Glyma.01G121000.Wm82.a2.v1	0	0	0	0.73	0	0	2.05	0	0	0.6	2.9	0	0.7	0	0	0	0	0.3	0	0	0	0	0.26	0	0	0	0	1	0	0	5	0	0	1	5	0	1	0	0	0	0	1	0	0	0	0	1	0	Chr01
Glyma.01G121300.Wm82.a2.v1	8.62	5.21	3.45	3.17	7.07	2.93	2.84	6.54	3.24	3.14	4.54	1.48	7.94	5.4	4.91	5.57	6.72	2.9	2.07	1.63	6.09	2.72	3.17	2.59	19	15	5	5	12	7	8	30	10	6	9	1	13	19	28	16	19	11	11	6	8	6	14	3	Chr01
Glyma.01G121400.Wm82.a2.v1	2.67	2.48	4.49	5.51	5.48	4.55	3.09	5.01	4.02	2.11	1.25	4.13	3.98	2.91	2.23	5.61	5.27	3.77	3.86	3.29	2.83	2.95	2.95	4.28	19	23	21	28	30	35	28	74	40	13	8	9	21	33	41	52	48	46	66	39	12	21	42	16	Chr01
Glyma.01G121600.Wm82.a2.v1	0	0	0	0	0	0	0	0	0	0	0	0	0	0	0	0.21	0	0	0	0	0	0	0	0	0	0	0	0	0	0	0	0	0	0	0	0	0	0	0	1	0	0	0	0	0	0	0	0	Chr01
Glyma.01G121700.Wm82.a2.v1	9.87	9.82	7.5	2.07	3.84	2.28	1.55	2.14	1.41	0.57	3.29	0	6.64	7.12	7.44	2.27	2.31	5.17	1.85	2.67	3.31	0	0.25	1.88	20	26	10	3	6	5	4	9	4	1	6	0	10	23	39	6	6	18	9	9	4	0	1	2	Chr01
Glyma.01G121900.Wm82.a2.v1	0	0	0	0	0	0	0	0	0	0	0	0	0	0	0	0.76	0.77	0	0	0.59	0	0	0	0	0	0	0	0	0	0	0	0	0	0	0	0	0	0	0	1	1	0	0	1	0	0	0	0	Chr01
Glyma.01G122000.Wm82.a2.v1	0	0	4.2	0	0	0	0	0	0.4	0	1.23	0	0	0	0.43	0.42	0	0.64	0.23	0	0	4.42	0.28	1.05	0	0	5	0	0	0	0	0	1	0	2	0	0	0	2	1	0	2	1	0	0	8	1	1	Chr01
Glyma.01G122100.Wm82.a2.v1	9.8	8.02	5.65	13.7	6.14	10.93	5.03	8.13	2.9	3.52	2.26	1.1	6.83	6.57	10.45	9.85	7.12	7.08	9.28	7.1	6.24	1.69	4.22	3.21	29	31	11	29	14	35	19	50	12	9	6	1	15	31	80	38	27	36	66	35	11	5	25	5	Chr01
Glyma.01G122300.Wm82.a2.v1	0	0	0	0	0	0	0	0	0.27	0	0	0	1.01	0.23	0.43	1.44	0.88	0	0.62	0.45	0.63	0.37	0.37	0	0	0	0	0	0	0	0	0	1	0	0	0	2	1	3	5	3	0	4	2	1	1	2	0	Chr01
Glyma.01G122800.Wm82.a2.v1	3.08	1.77	0	27.42	20.97	12.08	8.14	9.43	4.4	9.33	2.99	16.29	4.14	3.14	0.45	8.55	14.7	10.52	4	7.15	5.81	8.46	3.07	5.85	8	6	0	51	42	34	27	51	16	21	7	13	8	13	3	29	49	47	25	31	9	22	16	8	Chr01
Glyma.01G123100.Wm82.a2.v1	2.29	1.75	4.64	9.61	0	4.94	15.56	4.77	4.91	95.31	45.87	79.61	0	0.96	0.89	7.03	3.57	3.11	3.81	2.75	8.98	40.46	24.77	18.88	3	3	4	9	0	7	26	13	9	108	54	32	0	2	3	12	6	7	12	6	7	53	65	13	Chr01
Glyma.01G123300.Wm82.a2.v1	15.13	14.96	21.88	20.12	22.51	18.06	16.48	14.9	11.08	7.67	14.36	16.83	15.89	18.05	15.26	16.7	19.57	18.68	13.19	15.28	8.05	10.33	5.89	13.33	41	53	39	39	47	53	57	84	42	18	35	14	32	78	107	59	68	87	86	69	13	28	32	19	Chr01
Glyma.01G123400.Wm82.a2.v1	0	0	0.55	0	0.47	0.99	0	0.35	0	0	0	0	0	0	0.28	3.03	1.4	0.63	0.6	0.22	0	0	0	0	0	0	1	0	1	3	0	2	0	0	0	0	0	0	2	11	5	3	4	1	0	0	0	0	Chr01
Glyma.01G123500.Wm82.a2.v1	1.96	0.75	14.88	0	0	0	0	0	0	1.13	0	0	2.63	4.29	7.19	0	0	0.57	0	0	0	0	0	0	2	1	10	0	0	0	0	0	0	1	0	0	2	7	19	0	0	1	0	0	0	0	0	0	Chr01
Glyma.01G123600.Wm82.a2.v1	0.54	0	0	0	0	0	0	0	0	0	0	0	0	0	0	0	0	0	0	0	0	0	0	0	1	0	0	0	0	0	0	0	0	0	0	0	0	0	0	0	0	0	0	0	0	0	0	0	Chr01
Glyma.01G123700.Wm82.a2.v1	6.21	1.36	13.49	2.48	3.46	1.64	2.78	2.99	3.17	3.08	0.99	5.78	0	0	0	0	0	0	1.11	1.06	0	1.77	0	1.69	7	2	10	2	3	2	4	7	5	3	1	2	0	0	0	0	0	0	3	2	0	2	0	1	Chr01
Glyma.01G123800.Wm82.a2.v1	1.52	0	0	0	0	0	0	0	0	0	0	0	0	0	0	0	0	0	0	0	0	0	0	0	1	0	0	0	0	0	0	0	0	0	0	0	0	0	0	0	0	0	0	0	0	0	0	0	Chr01
Glyma.01G123900.Wm82.a2.v1	2.25	1.58	5.71	1.31	1.22	1.73	1.03	2.08	1.74	1.3	1.04	1.22	4.04	2.12	3.48	3.17	1.02	2.18	1.56	1.46	1.26	1.31	1.03	0.36	12	11	20	5	5	10	7	23	13	6	5	2	16	18	48	22	7	20	20	13	4	7	11	1	Chr01
Glyma.01G124000.Wm82.a2.v1	0	0.43	0	0	0	1.03	0	0.54	0	0	0	0	0.75	0	0.86	0.86	0	2.27	0.93	0	0	0	1.11	0	0	1	0	0	0	2	0	2	0	0	0	0	1	0	4	2	0	7	4	0	0	0	4	0	Chr01
Glyma.01G124100.Wm82.a2.v1	0	0.5	0	0.92	0	0	0	0	0	0	0	0	0	1.23	0.25	0.5	0	0	0.27	0	0	0	0	0	0	1	0	1	0	0	0	0	0	0	0	0	0	3	1	1	0	0	1	0	0	0	0	0	Chr01
Glyma.01G124200.Wm82.a2.v1	3.02	5.78	7.36	3.8	5.89	6.7	2.84	4.8	3.46	1.75	1.01	0	4.88	3.22	3.86	6.03	6.6	6.33	2.64	2.54	3.55	1.51	2.41	2.3	10	25	16	9	15	24	12	33	16	5	3	0	12	17	33	26	28	36	21	14	7	5	16	4	Chr01
Glyma.01G124300.Wm82.a2.v1	19.54	25.23	25.99	54.62	63.41	61.45	72.24	54.6	61.09	31.75	50.25	35.8	18.08	24.5	19.35	37.46	46.19	52.93	40.36	56.79	52.28	28.69	35.04	37.15	32	54	28	64	80	109	151	186	140	45	74	18	22	64	82	80	97	149	159	155	51	47	115	32	Chr01
Glyma.01G124400.Wm82.a2.v1	0	0	0	0	0	0	0	0	0	0	0	0	0	0	0	0	0	0	0	0	2.25	0	0	0	0	0	0	0	0	0	0	0	0	0	0	0	0	0	0	0	0	0	0	0	1	0	0	0	Chr01
Glyma.01G124500.Wm82.a2.v1	42.25	36.14	23.62	19.98	26.62	13.2	37.01	17.33	19.1	75.4	58.75	111.34	76.96	35.46	55.96	33.36	31.02	28.2	18.6	22.37	22.95	79.52	45.89	49.63	68	76	25	23	33	23	76	58	43	105	85	55	92	91	233	70	64	78	72	60	22	128	148	42	Chr01
Glyma.01G124600.Wm82.a2.v1	3.3	0.84	3.34	0	1.43	1.01	1.72	4.75	2.36	1.27	0	3.58	1.48	10.33	11.89	4.21	1.71	9.59	7.77	7.25	0	1.1	6.03	6.27	3	1	2	0	1	1	2	9	3	1	0	1	1	15	28	5	2	15	17	11	0	1	11	3	Chr01
Glyma.01G124700.Wm82.a2.v1	0	0.3	0.6	0.56	0	0	0.93	0	0.57	0	0.88	0	3.21	6.48	7.99	0.3	1.55	0.92	1.32	0.95	0.67	3.97	1.19	0.76	0	1	1	1	0	0	3	0	2	0	2	0	6	26	52	1	5	4	8	4	1	10	6	1	Chr01
Glyma.01G124900.Wm82.a2.v1	52.15	53.85	31.53	69.39	58.73	55.7	36.44	41.99	23.8	21.78	20.27	18.42	61.74	51.22	44.44	55.9	56.36	36.19	33.96	25.64	22.15	13.19	18.5	14.34	83	112	33	79	72	96	74	139	53	30	29	9	73	130	183	116	115	99	130	68	21	21	59	12	Chr01
Glyma.01G125000.Wm82.a2.v1	2.9	5.26	1.65	1.52	2.82	7.02	0.85	2.61	2.59	2.51	0.81	1.18	6.34	3.41	5.04	3.89	4.52	3.16	2.56	3.48	0.61	3.62	2.89	1.38	8	19	3	3	6	21	3	15	10	6	2	1	13	15	36	14	16	15	17	16	1	10	16	2	Chr01
Glyma.01G125100.Wm82.a2.v1	10.68	7.1	9.88	7.79	11.45	12.43	9.09	10.04	8.29	8.05	11.36	4.54	12.5	11.93	9.33	12.82	15.57	11.88	9.84	11.14	7.01	8.35	9.96	5.3	23	20	14	12	19	29	25	45	25	15	22	3	20	41	52	36	43	44	51	40	9	18	43	6	Chr01
Glyma.01G125200.Wm82.a2.v1	0	0.39	0	0.36	0.33	1.18	0	0.25	0.55	0	0	0	0.34	0.8	0.89	0	0	0.6	0	0.15	0	0	0.13	0	0	2	0	1	1	5	0	2	3	0	0	0	1	5	9	0	0	4	0	1	0	0	1	0	Chr01
Glyma.01G125400.Wm82.a2.v1	0	0	0	0	0	0	0	0	0.13	0	0	0	0	0	0	0	0	0	0	0	0	0	0	0	0	0	0	0	0	0	0	0	1	0	0	0	0	0	0	0	0	0	0	0	0	0	0	0	Chr01
Glyma.01G125500.Wm82.a2.v1	0	0	0	0	1.13	0	0	0	0	0	0	0	0	0	0	0	0	0	0	0	0	0	0.43	0	0	0	0	0	1	0	0	0	0	0	0	0	0	0	0	0	0	0	0	0	0	0	1	0	Chr01
Glyma.01G125600.Wm82.a2.v1	6.15	9.72	9.97	15.47	9.04	11.73	2.89	7.49	7.91	5.21	7.75	5.34	8.83	8.22	6.65	10.69	10.23	10.73	8.01	7.13	6.19	2.87	3.68	5.45	15	31	16	27	17	31	9	38	27	11	17	4	16	32	42	34	32	45	47	29	9	7	18	7	Chr01
Glyma.01G125800.Wm82.a2.v1	1.63	2.33	0.31	0.28	7.13	4.88	0.16	1.37	0.44	0	0.23	0	1.09	1.66	2.28	3.74	4.76	2.13	1.18	1.46	0	0	0.1	0	8	15	1	1	27	26	1	14	3	0	1	0	4	13	29	24	30	18	14	12	0	0	1	0	Chr01
Glyma.01G125900.Wm82.a2.v1	86.78	64.75	31.34	43.22	54.92	58.6	50.16	50.85	37.21	17.55	24.13	14.14	75.94	75.84	109.44	34.94	53.31	53.34	49.84	47.19	30.05	14.1	18.95	25.79	160	156	38	57	78	117	118	195	96	28	40	8	104	223	522	84	126	169	221	145	33	26	70	25	Chr01
Glyma.01G126000.Wm82.a2.v1	47.66	65.52	69.26	27.12	35.59	23.37	13.88	26.56	18.69	14.62	7.04	16.49	55.07	47.6	54.29	28.79	32.24	24.54	21.39	16.2	25.49	14.76	21.68	12.83	113	203	108	46	65	60	42	131	62	30	15	12	97	180	333	89	98	100	122	64	36	35	103	16	Chr01
Glyma.01G126200.Wm82.a2.v1	3.32	7.61	13.44	4.64	1.43	5.1	3.46	8.5	3.16	3.83	1.23	0	17.85	9.7	12.39	12.72	12.93	18.65	5.51	1.33	5.57	8.84	7.17	2.1	3	9	8	3	1	5	4	16	4	3	1	0	12	14	29	15	15	29	12	2	3	8	13	1	Chr01
Glyma.01G126600.Wm82.a2.v1	0	0	0	0	0	0	0	0	0	0	0	0	0	0	0.25	0	0	0	0	0	0	0	0	0	0	0	0	0	0	0	0	0	0	0	0	0	0	0	1	0	0	0	0	0	0	0	0	0	Chr01
Glyma.01G127200.Wm82.a2.v1	4.67	2.04	7.09	4.66	0	0.62	0	0	0.95	0.77	0	0	1.79	2.93	4.64	1.02	0	0.39	0.28	0	1.12	0	0	0	7	4	7	5	0	1	0	0	2	1	0	0	2	7	18	2	0	1	1	0	1	0	0	0	Chr01
Glyma.01G127400.Wm82.a2.v1	25.31	21.74	14.92	10.83	23.47	17.17	11.74	23.09	15.5	1.79	2.3	5.05	36.85	32.38	41.32	35.65	22.96	22.24	19.33	23.86	23.41	4.65	11.6	5.89	49	55	19	15	35	36	29	93	42	3	4	3	53	100	207	90	57	74	90	77	27	9	45	6	Chr01
Glyma.01G127500.Wm82.a2.v1	9.18	15.18	16.65	7.45	11.15	6.83	2.09	7.54	2.33	3.08	1.32	2.89	12.35	12.25	10.87	7.04	8.54	5.68	2.09	2.13	1.49	0.89	1.63	1.69	31	67	37	18	29	25	9	53	11	9	4	3	31	66	95	31	37	33	17	12	3	3	11	3	Chr01
Glyma.01G127600.Wm82.a2.v1	0.64	0.99	0	0	0	0	0	0	0	2.23	0	2.1	0	0	0.25	0.49	0	0	0.27	0.39	0	2.57	0	2.45	1	2	0	0	0	0	0	0	0	3	0	1	0	0	1	1	0	0	1	1	0	4	0	2	Chr01
Glyma.01G128000.Wm82.a2.v1	0	0	0	2.06	0	0.68	0	0	0	0	0	0	0	0	0	0.56	0.57	0	0	0.44	0	0	0	0	0	0	0	2	0	1	0	0	0	0	0	0	0	0	0	1	1	0	0	1	0	0	0	0	Chr01
Glyma.01G128100.Wm82.a2.v1	0	0	0	0	0	0	0	0	0	0	0	0	0	0.21	0	0	0	0	0.14	0	0	0.33	0	0	0	0	0	0	0	0	0	0	0	0	0	0	0	1	0	0	0	0	1	0	0	1	0	0	Chr01
Glyma.01G128200.Wm82.a2.v1	2.24	2.1	0	4.53	2.59	1.38	0.59	3.35	0.53	0	0.83	0	2.35	1.25	2.79	1.53	1.17	1.59	0.93	0.75	0.42	0.75	0.5	0	9	11	0	13	8	6	3	28	3	0	3	0	7	8	29	8	6	11	9	5	1	3	4	0	Chr01
Glyma.01G128300.Wm82.a2.v1	0	0.25	0	2.28	1.69	0.9	1.53	1.26	0.47	1.89	2.18	1.06	0	0.61	0.38	0.75	1.27	0.95	0.27	0.39	0	0.65	0.98	0.62	0	1	0	5	4	3	6	8	2	5	6	1	0	3	3	3	5	5	2	2	0	2	6	1	Chr01
Glyma.01G128500.Wm82.a2.v1	14.16	22.31	40.53	32.61	32.44	29.23	26.76	30.44	27.98	11.55	27.8	32.56	21.31	21.41	23.83	26.83	33.79	34.9	22.51	18.99	30.77	10.83	13.72	19.01	17	35	32	28	30	38	41	76	47	12	30	12	19	41	74	42	52	72	65	38	22	13	33	12	Chr01
Glyma.01G128700.Wm82.a2.v1	1.91	3.11	3.27	1.67	3.11	2.1	1.22	2.42	2.05	0.69	0.53	3.51	3.22	4.05	3.75	3.85	2.43	2.44	3.23	1.51	5.83	2.03	1.91	2.5	16	34	18	10	20	19	13	42	24	5	4	9	20	54	81	42	26	35	65	21	29	17	32	11	Chr01
Glyma.01G129100.Wm82.a2.v1	0	1.48	0	0	0	0	0	0	0	0	0	0	0	0	0	0	0	0	0	0	0	0	0	0	0	3	0	0	0	0	0	0	0	0	0	0	0	0	0	0	0	0	0	0	0	0	0	0	Chr01
Glyma.01G129200.Wm82.a2.v1	0	0	0	0	0	2.51	0	1.3	0	0	0	0	0	0	0.52	1.04	0	0.79	2.26	0	2.28	2.71	0	0	0	0	0	0	0	2	0	2	0	0	0	0	0	0	1	1	0	1	4	0	1	2	0	0	Chr01
Glyma.01G129400.Wm82.a2.v1	7.04	1.99	6.2	16.06	4.81	3.76	2.03	3.74	1.06	0.86	2.06	0	7.48	6.97	8.6	4.55	6.94	1.94	1.23	3.11	2.49	1.48	0.92	2.11	19	7	11	31	10	11	7	21	4	2	5	0	15	30	60	16	24	9	8	14	4	4	5	3	Chr01
Glyma.01G129600.Wm82.a2.v1	0.78	0	0	0	0	0	0	0.19	0	0	0	0	0	0	0	0	0	0	0	0	0	0	0	0	2	0	0	0	0	0	0	1	0	0	0	0	0	0	0	0	0	0	0	0	0	0	0	0	Chr01
Glyma.01G129700.Wm82.a2.v1	4.82	2.77	0	37.06	73.53	16.14	32.11	6.37	6.89	1.39	0	0	0.81	3.02	0.7	8.78	19.27	9.82	2.51	1.45	1.01	0	0.9	0	8	6	0	44	94	29	68	22	16	2	0	0	1	8	3	19	41	28	10	4	1	0	3	0	Chr01
Glyma.01G129800.Wm82.a2.v1	1.2	1.37	0	0.84	0.78	1.1	0.94	0.86	0	0	0	0	0	0.37	0.23	1.38	0.93	0	0.25	0	0	0	0	0	2	3	0	1	1	2	2	3	0	0	0	0	0	1	1	3	2	0	1	0	0	0	0	0	Chr01
Glyma.01G130000.Wm82.a2.v1	17.6	19.01	9.44	0	1.34	0	0	0	0	0	0	0	1.39	6.49	6.4	0	0	0	0	0	0	0	0	0	17	24	6	0	1	0	0	0	0	0	0	0	1	10	16	0	0	0	0	0	0	0	0	0	Chr01
Glyma.01G130200.Wm82.a2.v1	0	0	0	1.59	2.95	0	2.67	1.09	0	0	0	0	0	0	0	2.61	0.89	1.32	0.47	0	0	0	0.57	4.32	0	0	0	1	2	0	3	2	0	0	0	0	0	0	0	3	1	2	1	0	0	0	1	2	Chr01
Glyma.01G131100.Wm82.a2.v1	0.43	0.33	0	1.2	3.91	1.59	12.14	0.62	6.15	12.93	9.58	12.62	2.32	0	0.33	0.66	1.34	0.5	0.54	0.52	0.72	14.2	10.52	9.82	1	1	0	2	7	4	36	3	20	26	20	9	4	0	2	2	4	2	3	2	1	33	49	12	Chr01
Glyma.01G131200.Wm82.a2.v1	1.74	2.66	0.88	0	3.01	3.74	0.45	2.51	2.07	1.34	2.58	0	0.78	1.09	2.46	0.89	0.9	4.04	0.96	1.39	0	1.16	2.31	2.2	3	6	1	0	4	7	1	9	5	2	4	0	1	3	11	2	2	12	4	4	0	2	8	2	Chr01
Glyma.01G131300.Wm82.a2.v1	6.82	9.13	4.66	9.53	9.29	10.7	5.08	5.57	6.33	4.33	2.65	2.22	8.26	13.04	7.91	12.55	12.5	4.56	3.26	5.52	5.15	3.07	2.89	3.24	20	35	9	20	21	34	19	34	26	11	7	2	18	61	60	48	47	23	23	27	9	9	17	5	Chr01
Glyma.01G131400.Wm82.a2.v1	1.46	4.84	0.74	0	0	0	0	0	0	0	0	0	9.17	4.88	3.01	0	0	0	0	0	0	0	0.24	0	3	13	1	0	0	0	0	0	0	0	0	0	14	16	16	0	0	0	0	0	0	0	1	0	Chr01
Glyma.01G131500.Wm82.a2.v1	10.94	5.35	10.62	21.23	19.32	16.55	7.86	12.85	6.08	1.4	3.38	1.98	9.4	10.86	6.81	28.19	19.66	16.26	9.09	4.19	7.65	0.61	2.73	2.31	36	23	23	50	49	59	33	88	28	4	10	2	23	57	58	121	83	92	72	23	15	2	18	4	Chr01
Glyma.01G131800.Wm82.a2.v1	1.12	1.07	0.85	1.56	0	0	0.44	0.94	0.4	0.32	0.31	0	0.38	2.45	0.86	0.86	1.09	0.81	0.93	0.5	0.47	0.56	0	0	4	5	2	4	0	0	2	7	2	1	1	0	1	14	8	4	5	5	8	3	1	2	0	0	Chr01
Glyma.01G131900.Wm82.a2.v1	4.1	4.85	2.27	0	0.97	1.72	0	0.36	0.27	0.43	0	1.21	4.51	3.5	3.46	0	0	0.22	0	0	0.63	0.37	0.19	2.13	11	17	4	0	2	5	0	2	1	1	0	1	9	15	24	0	0	1	0	0	1	1	1	3	Chr01
Glyma.01G132000.Wm82.a2.v1	0.51	0.19	3.09	0	0	0	0	0	0	0	0	0	1.37	1.12	2.06	0	0	0	0	0	0	0	0	0	2	1	8	0	0	0	0	0	0	0	0	0	4	7	21	0	0	0	0	0	0	0	0	0	Chr01
Glyma.01G132300.Wm82.a2.v1	0.8	0	2.42	2.79	3.1	1.84	0.31	2.49	1.42	1.84	0.44	0	0	0.75	1.08	0.92	1.55	3.71	1.49	1.2	1.34	0.8	1.19	0	2	0	4	5	6	5	1	13	5	4	1	0	0	3	7	3	5	16	9	5	2	2	6	0	Chr01
Glyma.01G132400.Wm82.a2.v1	8.29	4.3	10.57	11.96	7.99	10.13	3.35	8.61	5.73	6.18	3.57	4.36	7.92	11.24	10.44	11.9	11.47	9.18	8.78	5.94	7.18	5.62	5.07	3.56	31	21	26	32	23	41	16	67	30	20	12	5	22	67	101	58	55	59	79	37	16	21	38	7	Chr01
Glyma.01G132500.Wm82.a2.v1	8427.29	6778.36	14516.2	3339.34	4164.49	4097.4	1950.88	5662.81	2339.76	420.1	517.6	309.51	6342.44	12850.4	10556.1	4215.09	3563.02	6209.82	4013.77	3652.65	2754.13	543.74	1188.16	1294.2	8693	9137	9848	2464	3309	4577	2568	12150	3377	375	480	98	4860	21140	28171	5669	4712	11009	9958	6279	1692	561	2456	702	Chr01
Glyma.01G132600.Wm82.a2.v1	21.87	31.46	2.66	83.15	106.74	73.5	76.77	67.28	43.13	37.4	36	54.14	28.26	29.62	9.8	106	66.86	63.11	43.64	48.29	57.28	63.84	54.56	38.26	25	47	2	68	94	91	112	160	69	37	37	19	24	54	29	158	98	124	120	92	39	73	125	23	Chr01
Glyma.01G132700.Wm82.a2.v1	0.31	0.24	0	0.44	0.4	0.86	0	0.3	0	0	0	0	0	0	0.24	0.96	1.46	0.91	0	0	0	0	0	1.19	1	1	0	1	1	3	0	2	0	0	0	0	0	0	2	4	6	5	0	0	0	0	0	2	Chr01
Glyma.01G132800.Wm82.a2.v1	2.23	1.14	3.39	5.72	2.41	1.03	1.17	2.5	1.86	0.86	0	0	3	1.87	2.3	3.42	3.77	1.3	1.86	1.34	3.12	1.49	0.93	0.71	6	4	6	11	5	3	4	14	7	2	0	0	6	8	16	12	13	6	12	6	5	4	5	1	Chr01
Glyma.01G133000.Wm82.a2.v1	0	0.31	0.62	0.28	0.26	1.5	0.16	1.56	0.14	0.94	1.35	0	0.55	0.38	0.39	0.93	2.21	1.65	0.76	1.7	1.02	1.22	0.3	0	0	2	2	1	1	8	1	16	1	4	6	0	2	3	5	6	14	14	9	14	3	6	3	0	Chr01
Glyma.01G133200.Wm82.a2.v1	2.39	0.92	0	0	0	0	0	0	0	0	0	0	0	1.5	1.85	2.75	0	1.39	0	0.72	0	0	0	0	2	1	0	0	0	0	0	0	0	0	0	0	0	2	4	3	0	2	0	1	0	0	0	0	Chr01
Glyma.01G133300.Wm82.a2.v1	1.21	0.53	0.26	0.24	0.23	0.8	0.14	0.75	0.12	0	0	0	0.47	0.98	0.6	0.27	0.14	0.81	0.94	0.31	0.29	0	0	0	7	4	1	1	1	5	1	9	1	0	0	0	2	9	9	2	1	8	13	3	1	0	0	0	Chr01
Glyma.01G133400.Wm82.a2.v1	220.66	293.34	187.89	357.84	412.51	357.47	467.38	302.5	540.71	317.65	269.29	488.84	293.66	264.08	239.79	595.74	460.29	344.83	455.59	397.24	757.95	307.6	449.28	383.67	175	304	98	203	252	307	473	499	600	218	192	119	173	334	492	616	468	470	869	525	358	244	714	160	Chr01
Glyma.01G133500.Wm82.a2.v1	3.53	3.24	56.92	14.81	0	0	0	0	0	2.45	0	0	3.8	9.74	7.92	0	0	0	0	0	0	0.71	1.06	0	5	6	53	15	0	0	0	0	0	3	0	0	4	22	29	0	0	0	0	0	0	1	3	0	Chr01
Glyma.01G133600.Wm82.a2.v1	0	0.84	0.83	0.77	0	1.01	0.43	1.05	0.39	0.63	0	0	0.74	0	1.27	0.42	0.86	0.32	0.91	0.33	0	1.65	1.64	1.04	0	2	1	1	0	2	1	4	1	1	0	0	1	0	6	1	2	1	4	1	0	3	6	1	Chr01
Glyma.01G133900.Wm82.a2.v1	4.82	1.05	2.1	0	0.89	0.64	0	0.99	0.49	0	0	0	3.71	5.18	6.39	0	1.07	0.8	0.29	0	1.16	0	0	0	7	2	2	0	1	1	0	3	1	0	0	0	4	12	24	0	2	2	1	0	1	0	0	0	Chr01
Glyma.01G134200.Wm82.a2.v1	0	0.32	0.64	1.77	2.19	1.17	0.99	1.83	1.21	0.49	0	0	1.14	0.26	0.65	1.94	0.99	0.98	1.23	2.79	1.42	0	0	0	0	1	1	3	4	3	3	9	4	1	0	0	2	1	4	6	3	4	7	11	2	0	0	0	Chr01
Glyma.01G134300.Wm82.a2.v1	0	0	0	2.46	0	0	0.46	2.54	2.1	2.71	1.31	0	0	1.47	0	1.8	1.37	1.02	1.95	2.47	0	0.59	1.46	3.35	0	0	0	3	0	0	1	9	5	4	2	0	0	4	0	4	3	3	8	7	0	1	5	3	Chr01
Glyma.01G134400.Wm82.a2.v1	5.67	3.72	9.24	10.76	8.94	4.49	5.71	3.31	4.05	6.55	4.05	5.28	6.54	5.84	5.48	5.59	6	7.54	4.55	4.62	1.36	4.45	2.83	0.77	14	12	15	19	17	12	18	17	14	14	9	4	12	23	35	18	19	32	27	19	2	11	14	1	Chr01
Glyma.01G134500.Wm82.a2.v1	0.18	0	0	0	0	0.16	0	0	0	0	0	0	0	0.11	0.07	0.13	0	0	0	0	0	0	0.09	0	1	0	0	0	0	1	0	0	0	0	0	0	0	1	1	1	0	0	0	0	0	0	1	0	Chr01
Glyma.01G134600.Wm82.a2.v1	0	0	0.37	0.68	0	0	0	0	0	0	0	0	0	0.46	0.28	0	0	0	0	0	0	0	0	0	0	0	1	2	0	0	0	0	0	0	0	0	0	3	3	0	0	0	0	0	0	0	0	0	Chr01
Glyma.01G135200.Wm82.a2.v1	0	0.28	2.79	3.08	0	0.34	0	0	0	0	0	0	0.99	0	0.99	0	0	0	0	0	0	0	0	0	0	1	5	6	0	1	0	0	0	0	0	0	2	0	7	0	0	0	0	0	0	0	0	0	Chr01
Glyma.01G135400.Wm82.a2.v1	0	0	0	0	0	0	0	0	0.27	0	0	0	0	0	0	0	0	0	0	0	0	0	0	0	0	0	0	0	0	0	0	0	1	0	0	0	0	0	0	0	0	0	0	0	0	0	0	0	Chr01
Glyma.01G135500.Wm82.a2.v1	0	0.36	1.41	2.6	3.02	0.43	0.36	1.12	0.33	0	0	0	1.25	0.58	0.54	1.07	0.36	1.89	0.19	0.56	0	0	0.23	0	0	1	2	4	5	1	1	5	1	0	0	0	2	2	3	3	1	7	1	2	0	0	1	0	Chr01
Glyma.01G135900.Wm82.a2.v1	2.66	3.4	2.03	7.45	4.61	4.51	3.48	4.48	3.49	1.54	1.98	4.34	1.79	3.9	3.78	4.43	3.12	2.07	2.95	2.4	5.96	0.44	1.99	5.91	6	10	3	12	8	11	10	21	11	3	4	3	3	14	22	13	9	8	16	9	8	1	9	7	Chr01
Glyma.01G136000.Wm82.a2.v1	30.81	33.69	16.25	20.22	17.96	30.78	13.8	19.65	22.02	13.81	13.29	16.39	22.01	27.21	27.47	26.53	29.43	29.27	24.58	15.85	14.78	13.83	16	16.74	49	70	17	23	22	53	28	65	49	19	19	8	26	69	113	55	60	80	94	42	14	22	51	14	Chr01
Glyma.01G136100.Wm82.a2.v1	4.85	7.22	4.51	10.56	8.4	5.23	3.8	8.04	4.82	1.56	1.5	2.64	6.54	8.46	4.17	12.41	11.36	9.73	8.07	5.34	4.53	4.31	2.69	2.56	18	35	11	28	24	21	18	62	25	5	5	3	18	50	40	60	54	62	72	33	10	16	20	5	Chr01
Glyma.01G136200.Wm82.a2.v1	1.06	0	0	0	0	0	0	0	0.75	0	0	0	0	0.66	0	0	0	0	0	0.63	0	1.06	0	0	1	0	0	0	0	0	0	0	1	0	0	0	0	1	0	0	0	0	0	1	0	1	0	0	Chr01
Glyma.01G136300.Wm82.a2.v1	6.68	7.77	10.97	7.47	10.76	5.43	5.65	6.42	1.91	2.47	2.08	4.35	8.27	6.2	4.65	10.04	6.67	6.38	3.67	2.73	4.49	2.14	2.67	1.52	25	38	27	20	31	22	27	50	10	8	7	5	23	37	45	49	32	41	33	17	10	8	20	3	Chr01
Glyma.01G136400.Wm82.a2.v1	2.56	0	0	0	0	1.18	0	1.85	0	0	0	0	1.72	3.21	1.49	0.98	0	1.49	0.53	0	0	0	0.64	0	2	0	0	0	0	1	0	3	0	0	0	0	1	4	3	1	0	2	1	0	0	0	1	0	Chr01
Glyma.01G136500.Wm82.a2.v1	0.54	0.41	0.41	0	1.06	2	0.21	0.91	0	0.31	0.6	0	1.09	0.51	1.15	1.87	2.11	0.79	1.58	0.65	0.46	0.27	0.27	0	2	2	1	0	3	8	1	7	0	1	2	0	3	3	11	9	10	5	14	4	1	1	2	0	Chr01
Glyma.01G136600.Wm82.a2.v1	0	0	0	0	0	0	0	0	0	0	0	0	0	0	0	5.29	0	0	2.15	0	0	0	0	0	0	0	0	0	0	0	0	0	0	0	0	0	0	0	0	8	0	0	6	0	0	0	0	0	Chr01
Glyma.01G137000.Wm82.a2.v1	7.62	7.78	0	6.22	11.55	5.28	2.99	5.5	1.82	0	0	2.07	3.42	3.19	2.95	8.77	13.88	7.39	1.06	1.91	2.13	0.64	1.27	2.42	12	16	0	7	14	9	6	18	4	0	0	1	4	8	12	18	28	20	4	5	2	1	4	2	Chr01
Glyma.01G137200.Wm82.a2.v1	4.26	2.79	1.85	28.9	52.88	98.82	69.09	93.83	114.28	33.02	27.73	47.54	2.46	4.96	0.47	161.35	116.66	131.96	122.35	102.89	130.67	53.49	66.45	69.37	7	6	2	34	67	176	145	321	263	47	41	24	3	13	2	346	246	373	484	282	128	88	219	60	Chr01
Glyma.01G137300.Wm82.a2.v1	3.9	4.59	2.28	5.87	4.28	4.71	2.35	3.75	3.64	1.04	0.67	0	2.42	4.89	7.3	4.37	3.51	5.41	4.61	3.42	2.01	1.5	0.9	1.71	13	20	5	14	11	17	10	26	17	3	2	0	6	26	63	19	15	31	37	19	4	5	6	3	Chr01
Glyma.01G137500.Wm82.a2.v1	2.37	3.17	0.9	3.31	0.77	1.09	0.46	1.71	0.42	3.42	1.32	0	0	3.34	0.46	0	2.31	0.69	1.48	0.71	1.99	0.59	0.3	0	4	7	1	4	1	2	1	6	1	5	2	0	0	9	2	0	5	2	6	2	2	1	1	0	Chr01
Glyma.01G137600.Wm82.a2.v1	0	0	0	0	0.91	0	1.1	0	0	0	0	0	0	0	0	0	0	0	0.29	0	0	0	0	0	0	0	0	0	1	0	2	0	0	0	0	0	0	0	0	0	0	0	1	0	0	0	0	0	Chr01
Glyma.01G137700.Wm82.a2.v1	0	0	0	0	0	0	0	0.18	0.27	0	0	0	0	0	0.29	0.29	0	0.43	0.15	0	0	0	0	0	0	0	0	0	0	0	0	1	1	0	0	0	0	0	2	1	0	2	1	0	0	0	0	0	Chr01
Glyma.01G137800.Wm82.a2.v1	0	0	0	0	0	0	0	1.47	0	0	0	0	0	0	0	0	0	0	0	0	0	0	0	0	0	0	0	0	0	0	0	1	0	0	0	0	0	0	0	0	0	0	0	0	0	0	0	0	Chr01
Glyma.01G138300.Wm82.a2.v1	16.41	14.21	15.11	23.55	15.14	17.95	12.19	15.78	10.19	12.48	10.09	11.26	7.56	11.65	11.69	22.2	13.48	17.09	11.13	14.26	7.25	6.05	10.35	7.39	38	43	23	39	27	45	36	76	33	25	21	8	13	43	70	67	40	68	62	55	10	14	48	9	Chr01
Glyma.01G138400.Wm82.a2.v1	1.22	0.47	0	0	0	0	0	0	0	0	0	0	0	1.92	0.95	0	0	0	0	0	0	0	0	0	2	1	0	0	0	0	0	0	0	0	0	0	0	5	4	0	0	0	0	0	0	0	0	0	Chr01
Glyma.01G138800.Wm82.a2.v1	11.63	12.14	5.9	13.3	14.64	14	8.01	10.34	3.78	4.89	5.1	6.89	7.12	13.7	7.77	10.27	14.57	10.25	9.67	10.58	7.1	3.88	5.98	4.69	33	45	11	27	32	43	29	61	15	12	13	6	15	62	57	38	53	50	66	50	12	11	34	7	Chr01
Glyma.01G139000.Wm82.a2.v1	10.46	13.04	4.71	4.87	7.04	5.72	6.98	5.59	5.54	6.27	2.58	5.05	7.3	10.2	7.33	7.13	4.23	5.86	4.99	3.72	5.85	1.94	2.13	1.47	27	44	8	9	14	16	23	30	20	14	6	4	14	42	49	24	14	26	31	16	9	5	11	2	Chr01
Glyma.01G139100.Wm82.a2.v1	2.7	2.07	0.69	1.26	0.59	1.67	0.35	1.3	0.64	0.52	1.5	1.47	1.21	1.98	1.39	2.42	2.81	1.31	1.69	1.62	0	0.9	1.12	1.71	6	6	1	2	1	4	1	6	2	1	3	1	2	7	8	7	8	5	9	6	0	2	5	2	Chr01
Glyma.01G139500.Wm82.a2.v1	4.84	7.99	1.94	2.85	1.32	1.18	0.4	1.35	0.91	0	0	0	9.94	8.94	7.08	1.17	1.99	1.48	0.95	0.92	0.85	0	0.13	0	19	41	5	8	4	5	2	11	5	0	0	0	29	56	72	6	10	10	9	6	2	0	1	0	Chr01
Glyma.01G139600.Wm82.a2.v1	25.6	20.39	29.46	21.77	22.01	24.92	8.95	22.12	9.64	9.2	5	5.64	27.48	26.47	28.89	25.21	32.12	23.55	17.41	12.87	8.71	4.15	9.67	7.24	74	77	56	45	49	78	33	133	39	23	13	5	59	122	216	95	119	117	121	62	15	12	56	11	Chr01
Glyma.01G139700.Wm82.a2.v1	1.36	2.7	1.45	0.57	2.29	0.63	0.43	1.63	0.49	0.47	0.6	1.33	1.1	1.62	1.47	1.67	3.39	1.11	1.02	1.06	0.46	0.54	0.61	0.52	10	26	7	3	13	5	4	25	5	3	4	3	6	19	28	16	32	14	18	13	2	4	9	2	Chr01
Glyma.01G139900.Wm82.a2.v1	0.67	0	1.02	0	0.87	1.86	0	1.29	0.48	0	0	2.19	0.91	0	1.56	1.03	0	0.39	0.28	0	0	1.35	0.34	0	1	0	1	0	1	3	0	4	1	0	0	1	1	0	6	2	0	1	1	0	0	2	1	0	Chr01
Glyma.01G140200.Wm82.a2.v1	6.29	9.25	2.94	6.09	6.28	8.49	4.55	6.98	3.11	3.35	2.69	4.73	9.77	6.67	6.73	7.42	6.79	6.76	5.83	3.77	5.69	2.9	2.17	2.76	13	25	4	9	10	19	12	30	9	6	5	3	15	22	36	20	18	24	29	13	7	6	9	3	Chr01
Glyma.01G140600.Wm82.a2.v1	2.92	2.65	1.94	2.8	0.95	1.18	1.14	2.1	1.17	0.84	1.62	1.78	1.72	2.63	2.54	2.24	2.13	2.86	2.2	1.31	2.14	1.82	0.91	0.35	16	19	7	11	4	7	8	24	9	4	8	3	7	23	36	16	15	27	29	12	7	10	10	1	Chr01
Glyma.01G140900.Wm82.a2.v1	0.41	0.63	0	1.15	0	1.52	0.65	0.2	0.88	0.48	0.46	0	0	0.78	0.16	0.32	0.96	0.48	0.51	0.74	0	0.41	0.21	0	1	2	0	2	0	4	2	1	3	1	1	0	0	3	1	1	3	2	3	3	0	1	1	0	Chr01
Glyma.01G141600.Wm82.a2.v1	15.02	25.65	0	37.16	103.52	37.35	0	23.89	8.26	0	0	0	14	32.61	8.93	39	49.58	14.79	10.57	4.16	1.94	1.16	1.15	0	13	29	0	23	69	35	0	43	10	0	0	0	9	45	20	44	55	22	22	6	1	1	2	0	Chr01
Glyma.01G141800.Wm82.a2.v1	5.73	13.16	0	25.65	87.83	16.94	0	5.51	0.82	0	0	0	12.35	12.22	9.31	19.35	27.73	7.34	2.86	0.69	1.93	1.15	0	0	5	15	0	16	59	16	0	10	1	0	0	0	8	17	21	22	31	11	6	1	1	1	0	0	Chr01
Glyma.01G141900.Wm82.a2.v1	0.54	2.08	0.83	3.05	1.41	3.52	3.84	1.83	0.78	3.15	3.64	8.87	0.73	0.34	2.53	2.09	1.7	0.95	1.59	3.6	1.83	7.08	1.9	8.29	1	5	1	4	2	7	9	7	2	5	6	5	1	1	12	5	4	3	7	11	2	13	7	8	Chr01
Glyma.01G142000.Wm82.a2.v1	0	1.71	0	0	2.9	2.06	0	0	0	0	0	0	1.5	0.7	1.3	0.86	1.74	1.95	0	0	0	0	0	0	0	2	0	0	2	2	0	0	0	0	0	0	1	1	3	1	2	3	0	0	0	0	0	0	Chr01
Glyma.01G142300.Wm82.a2.v1	5.91	4.99	9.3	8.26	4.23	6.02	3.99	5.09	4.08	1.18	2.04	3.32	6.04	4.98	7.64	6.1	6.84	4.74	3.81	4.16	4.11	1.63	3.76	2.33	29	32	30	29	16	32	25	52	28	5	9	5	22	39	97	39	43	40	45	34	12	8	37	6	Chr01
Glyma.01G142400.Wm82.a2.v1	631.53	1420.46	1718.78	0	0.62	0.44	0	0.23	0	0	0	0	315.06	72.19	178.73	0	0	0.55	0.98	0	0	0	0	0	1333	3918	2386	0	1	1	0	1	0	0	0	0	494	243	976	0	0	2	5	0	0	0	0	0	Chr01
Glyma.01G142600.Wm82.a2.v1	0.3	1.17	1.39	0.85	0	0.28	0.48	0.88	0.22	0.35	0	0.99	0.82	0.38	0.12	0.93	0	0.35	0.63	0	0	0.3	0.15	0.58	1	5	3	2	0	1	2	6	1	1	0	1	2	2	1	4	0	2	5	0	0	1	1	1	Chr01
Glyma.01G142700.Wm82.a2.v1	0.57	2.07	0.86	1.79	1.84	1.57	1.89	1.84	1.52	1.31	1.11	1.39	0.96	1.51	1.43	2.61	2.1	1.32	2.3	2.39	4.53	1.28	1.56	1.89	4	19	4	9	10	12	17	27	15	8	7	3	5	17	26	24	19	16	39	28	19	9	22	7	Chr01
Glyma.01G142800.Wm82.a2.v1	5.66	1.44	0	4.4	0.82	1.16	0.99	2.12	0	0.73	0.7	0	0.85	1.58	3.89	0.97	1.47	1.46	2.36	1.89	1.06	2.52	1.26	1.2	9	3	0	5	1	2	2	7	0	1	1	0	1	4	16	2	3	4	9	5	1	4	4	1	Chr01
Glyma.01G142900.Wm82.a2.v1	7.19	13.2	14.21	5.02	7.46	2.65	2.82	4.15	1.54	1.66	0	0	13.55	8.56	6.39	3.31	4.49	5.44	2.99	3.02	3.62	1.44	3.23	4.1	10	24	13	5	8	4	5	12	3	2	0	0	14	19	23	6	8	13	10	7	3	2	9	3	Chr01
Glyma.01G143100.Wm82.a2.v1	15.25	21.76	14.41	30.53	39.05	18.26	6.78	20.6	5.3	0.95	1.38	2.68	17.75	12.4	9.4	43.93	39.21	18.7	13.02	3.96	7.61	4.53	5.55	3.13	37	69	23	53	73	48	21	104	18	2	3	2	32	48	59	139	122	78	76	16	11	11	27	4	Chr01
Glyma.01G143200.Wm82.a2.v1	0	0.42	0	0	0	0	0	0	0	0	0	0	0	0	0.42	0	0	0.32	0	0	0	0	0	0	0	1	0	0	0	0	0	0	0	0	0	0	0	0	2	0	0	1	0	0	0	0	0	0	Chr01
Glyma.01G143700.Wm82.a2.v1	2.18	1.8	1.53	4.93	1.96	2.79	1.98	1.7	1.32	1.17	0.75	3.28	2.04	1.26	1.62	3.48	2.88	2.35	1.96	1.11	1.13	2.69	2.18	0.96	13	14	6	21	9	18	15	21	11	6	4	6	9	12	25	27	22	24	28	11	4	16	26	3	Chr01
Glyma.01G143800.Wm82.a2.v1	0	0	0	0	0	0	0	0	0	0	0	0	0	0	0.5	0	0	0	0	0	0	0	0	0	0	0	0	0	0	0	0	0	0	0	0	0	0	0	2	0	0	0	0	0	0	0	0	0	Chr01
Glyma.01G143900.Wm82.a2.v1	0	0	0	2.32	0.72	0	1.73	0	0.39	0	0	0	0	0	0	0	0	0.32	0.23	0.99	0.93	1.1	0.55	1.05	0	0	0	3	1	0	4	0	1	0	0	0	0	0	0	0	0	1	1	3	1	2	2	1	Chr01
Glyma.01G144200.Wm82.a2.v1	3.05	3.32	1.78	2.79	3.66	4.12	2.3	2.76	1.93	1.36	1.17	0.76	2.53	3.16	2.86	3.33	3.11	2.94	2.05	1.69	3.74	2.23	1.82	1.12	26	37	10	17	24	38	25	49	23	10	9	2	16	43	63	37	34	43	42	24	19	19	31	5	Chr01
Glyma.01G144300.Wm82.a2.v1	0	0	3.39	3.74	0.58	0	0	0	0	0	0	0	0	0	0.17	0	0	0	0	0	0	0	0	0	0	0	5	6	1	0	0	0	0	0	0	0	0	0	1	0	0	0	0	0	0	0	0	0	Chr01
Glyma.01G144400.Wm82.a2.v1	0.41	0	0	5.1	3.68	0	2.22	2.73	0	0.94	1.8	0	0	0.25	0	0.62	0.63	1.89	1.85	0.73	2.04	3.65	2.02	0	1	0	0	9	7	0	7	14	0	2	4	0	0	1	0	2	2	8	11	3	3	9	10	0	Chr01
Glyma.01G144500.Wm82.a2.v1	2.59	1.49	1.31	2.72	3.08	1.99	2.37	2.28	2.16	2.74	2.4	4.22	3.78	1.9	1.17	2.98	1.52	3.01	3.05	3.11	3.99	3.24	1.72	2.46	12	9	4	9	11	10	14	22	14	11	10	6	13	14	14	18	9	24	34	24	11	15	16	6	Chr01
Glyma.01G144700.Wm82.a2.v1	0.68	1.57	3.12	0	2.66	0	0	0	0.49	0	0	0	0.92	1.29	0.26	0	0.53	1.59	0	0	0	0.68	1.02	0	1	3	3	0	3	0	0	0	1	0	0	0	1	3	1	0	1	4	0	0	0	1	3	0	Chr01
Glyma.01G144800.Wm82.a2.v1	10.13	9.82	12.32	18.88	18.41	24.31	6.88	13.96	5.31	4.68	3.75	4.4	11.81	17.36	8.09	13.98	12.11	15.32	10.95	8.51	9.07	5.4	6.4	10.27	15	19	12	20	21	39	13	43	11	6	5	2	13	41	31	27	23	39	39	21	8	8	19	8	Chr01
Glyma.01G144900.Wm82.a2.v1	1.36	0	0.52	1.9	3.08	8.46	6.38	5.54	5.57	3.14	7.54	4.42	0	1.7	0.52	5.46	8.2	7.1	8.18	6.92	9.11	9.49	4.06	10.96	4	0	1	4	7	27	24	34	23	8	20	4	0	8	4	21	31	36	58	34	16	28	24	17	Chr01
Glyma.01G145000.Wm82.a2.v1	66.63	65.15	28.14	49.16	52.86	67.51	42.06	55.17	38.36	26.74	32.94	36.18	58.55	91.1	80.84	69.56	64.96	63.54	61.18	49.98	41.95	34.23	36.95	45.76	72	92	20	38	44	79	58	124	58	25	32	12	47	157	226	98	90	118	159	90	27	37	80	26	Chr01
Glyma.01G145200.Wm82.a2.v1	0.31	0.24	0.96	0	0	0	0	0	0.22	0	0	0	0	3.74	0.61	0.24	0	0	0.78	0	0.53	0.63	0	0	1	1	2	0	0	0	0	0	1	0	0	0	0	19	5	1	0	0	6	0	1	2	0	0	Chr01
Glyma.01G145300.Wm82.a2.v1	8.94	6.84	14.57	20.54	7.46	25.36	9.01	14.13	8.22	6.64	4.97	2.08	7.74	8.81	9.38	12.25	12.95	11.15	8.5	7.28	2.14	8.3	9.24	2.43	14	14	15	23	9	43	18	46	18	9	7	1	9	22	38	25	26	30	32	19	2	13	29	2	Chr01
Glyma.01G145400.Wm82.a2.v1	6.3	4.96	5.59	1.47	2.95	5.17	2.33	3.28	3	1.01	0.78	2.85	4.71	4.17	5.41	3.76	5.19	4.38	4.08	3.47	4.11	1.57	1.92	0.67	36	37	21	6	13	32	17	39	24	5	4	5	20	38	80	28	38	43	56	33	14	9	22	2	Chr01
Glyma.01G145600.Wm82.a2.v1	0	0	0	0	0	0	0	0	0	0	0	0	0.98	4.56	0	0	0	0	0	0.44	0	0	0	0	0	0	0	0	0	0	0	0	0	0	0	0	1	10	0	0	0	0	0	1	0	0	0	0	Chr01
Glyma.01G146100.Wm82.a2.v1	4.83	3.4	4.7	5.13	5.27	4.1	4.39	4.65	2.62	2.23	2.15	1.89	4.42	4.12	4.63	2.96	2.11	3.49	4.18	3.94	1.95	2.13	1.83	4.04	25	23	16	19	21	23	29	50	19	10	10	3	17	34	62	20	14	31	52	34	6	11	19	11	Chr01
Glyma.01G146300.Wm82.a2.v1	1.05	1.61	3.99	6.6	3.4	10.17	2.88	6.05	7.5	0.61	4.08	10.25	6.36	2.96	1.42	14.08	13.09	10.99	10.69	6.92	14.97	7.34	3.14	2	2	4	5	9	5	21	7	24	20	1	7	6	9	9	7	35	32	36	49	22	17	14	12	2	Chr01
Glyma.01G146400.Wm82.a2.v1	10.91	11.29	13.17	13	15.82	11.26	8.8	10.49	7.11	5.56	4.99	3.13	13.82	11.66	11.03	12.3	14.26	11.76	7.6	7.51	5.39	5.45	6.88	4.88	34	46	27	29	38	38	35	68	31	15	14	3	32	58	89	50	57	63	57	39	10	17	43	8	Chr01
Glyma.01G146500.Wm82.a2.v1	0	0	0.6	1.11	0	0	0	0	0	0	0	0	1.07	0	0.15	0	0	0	0	0	0	0	0	0	0	0	1	2	0	0	0	0	0	0	0	0	2	0	1	0	0	0	0	0	0	0	0	0	Chr01
Glyma.01G146600.Wm82.a2.v1	3.16	1.21	6.93	2.94	1.14	3.56	2.47	3.54	2.63	1.62	1.56	0.57	3.54	2.09	2.71	5.51	2.6	3.67	5.9	4.94	2.65	3.51	2.54	1.33	18	9	26	12	5	22	18	42	21	8	8	1	15	19	40	41	19	36	81	47	9	20	29	4	Chr01
Glyma.01G146900.Wm82.a2.v1	0	0.4	0.8	0	0	0	0	0.51	0.38	0	0	0	0	0.33	0.2	0	0	0	0.22	0	0	0	0	0	0	1	1	0	0	0	0	2	1	0	0	0	0	1	1	0	0	0	1	0	0	0	0	0	Chr01
Glyma.01G147000.Wm82.a2.v1	0.56	0.43	0	0.39	1.1	0.52	0.22	0.14	0.2	0	0	0	0	0.71	0.65	0.65	0.66	0.33	0.7	0.34	0.47	0	0.42	0.54	2	2	0	1	3	2	1	1	1	0	0	0	0	4	6	3	3	2	6	2	1	0	3	1	Chr01
Glyma.01G147300.Wm82.a2.v1	0	0	0	0	0.71	0	0	0	0	0	0	0	0.74	0	0	0.42	0	0.64	0	0	0	0	0	0	0	0	0	0	1	0	0	0	0	0	0	0	1	0	0	1	0	2	0	0	0	0	0	0	Chr01
Glyma.01G147400.Wm82.a2.v1	0.62	0.72	0.47	1.31	1.62	0.86	0.49	2.25	0.89	0.36	0	0	0	0.98	0.6	1.2	1.7	1.09	0.39	0.37	0	0.31	0.16	1.19	2	3	1	3	4	3	2	15	4	1	0	0	0	5	5	5	7	6	3	2	0	1	1	2	Chr01
Glyma.01G147500.Wm82.a2.v1	3.03	3.01	1.38	3.81	3.54	3.63	1.19	3.78	1.73	1.05	1.01	0.99	5.3	3.04	1.52	4.18	5.19	2.64	1.26	1.45	1.52	0.3	0.45	2.3	10	13	3	9	9	13	5	26	8	3	3	1	13	16	13	18	22	15	10	8	3	1	3	4	Chr01
Glyma.01G147600.Wm82.a2.v1	7.28	5.11	2.77	3.39	1.57	1.12	1.43	1.46	0.43	0	0.67	0	9.8	7.23	4.22	1.4	1.89	0	0.25	0.73	1.02	0	0.3	0	12	11	3	4	2	2	3	5	1	0	1	0	12	19	18	3	4	0	1	2	1	0	1	0	Chr01
Glyma.01G147700.Wm82.a2.v1	6.68	4.01	4.35	4	4.95	4.84	2.24	4.81	3.75	2.2	4.24	0	6.42	3.29	3.13	2.56	3.72	3.88	4.96	5.15	5.6	2.38	2.38	3.63	14	11	6	6	8	11	6	21	11	4	8	0	10	11	17	7	10	14	25	18	7	5	10	4	Chr01
Glyma.01G147800.Wm82.a2.v1	0.69	0	1.06	1.94	2.1	0.64	1.27	1.67	1.32	0.53	0.51	0.75	1.25	1.16	1.07	1.24	0.72	2.15	0.96	1.25	0	0.69	0.12	0	3	0	3	6	7	3	7	15	8	2	2	1	4	8	12	7	4	16	10	9	0	3	1	0	Chr01
Glyma.01G148100.Wm82.a2.v1	2.9	2.88	3.27	3.3	3.35	2.78	1.68	2.32	2.61	1.24	0.72	1.4	1.59	2.83	2.03	3.54	2.51	2.75	2.9	2.26	2.34	1.29	1.61	0.61	27	35	20	22	24	28	20	45	34	10	6	4	11	42	49	43	30	44	65	35	13	12	30	3	Chr01
Glyma.01G148200.Wm82.a2.v1	0	0	0	0	0	0	0	0	0	0	0	0	0	0	0	0	0	0	0	0.15	0	0	0	0	0	0	0	0	0	0	0	0	0	0	0	0	0	0	0	0	0	0	0	1	0	0	0	0	Chr01
Glyma.01G148300.Wm82.a2.v1	4.52	7.19	1.59	5.84	4.52	3.53	3	2.84	2.49	1.61	3.1	1.13	4.68	6.33	6.32	3.2	2.17	3.85	2.31	2.51	0.58	0	2.6	1.32	13	27	3	12	10	11	11	17	10	4	8	1	10	29	47	12	8	19	16	12	1	0	15	2	Chr01
Glyma.01G148500.Wm82.a2.v1	37.02	30.36	45.24	41.59	49.78	34.8	22.8	38.46	24.57	21.39	16.91	23.69	32.93	50.16	35.78	41.58	43.83	37.31	27.49	34.52	33.3	27.1	21.45	22.63	56	60	45	45	58	57	44	121	52	28	23	11	37	121	140	82	85	97	100	87	30	41	65	18	Chr01
Glyma.01G148600.Wm82.a2.v1	2.2	2.7	5.36	4.93	7.43	4.88	6.21	6.14	4.09	3.56	2.94	5.74	0	3.04	0.51	6.08	8.93	3.59	6.04	2.91	2.22	3.52	1.1	1.68	5	8	8	8	13	12	18	29	13	7	6	4	0	11	3	18	26	14	33	11	3	8	5	2	Chr01
Glyma.01G148700.Wm82.a2.v1	10.21	22.81	5.59	11.99	19.09	30.55	38.72	24.54	34.73	9.91	14.99	11.97	15.94	14.6	8.84	32.26	23.25	32.79	32.94	30.39	43.88	8.98	15.08	21.75	25	73	9	21	36	81	121	125	119	21	33	9	29	57	56	103	73	138	194	124	64	22	74	28	Chr01
Glyma.01G148800.Wm82.a2.v1	28.03	27.66	30.28	12.37	6.7	14.3	9.83	10.99	6.85	6.82	4.1	0	25.81	16.19	18.53	14.14	11.51	14.16	4.6	5.31	6.19	7.37	3.68	2.81	38	49	27	12	7	21	17	31	13	8	5	0	26	35	65	25	20	33	15	12	5	10	10	2	Chr01
Glyma.01G148900.Wm82.a2.v1	1.66	0.76	1.01	3.25	2.16	0.61	2.86	1.28	2.85	3.07	1.85	5.41	0.45	0.83	0.39	1.27	2.07	1.16	2.49	1.2	1.12	5.31	4.47	0.63	5	3	2	7	5	2	11	8	12	8	5	5	1	4	3	5	8	6	18	6	2	16	27	1	Chr01
Glyma.01G149000.Wm82.a2.v1	51.76	33.15	55.15	56.61	43.89	36.75	29.53	33.69	32.72	30.52	30.16	53.92	45.03	36.21	42.74	37.27	33.24	31.35	33.67	31.7	41.39	29.22	34.44	28.8	147	123	103	115	96	113	107	199	130	75	77	47	95	164	314	138	121	153	230	150	70	83	196	43	Chr01
Glyma.01G149300.Wm82.a2.v1	53.07	43.57	28.14	2.27	3.7	2.82	0.64	2.74	0.73	0.94	0.23	0.66	55.57	57.89	68.93	3.28	3.65	3.08	1.78	1.71	1.02	1.02	0.61	0	261	280	91	8	14	15	4	28	5	4	1	1	203	454	877	21	23	26	21	14	3	5	6	0	Chr01
Glyma.01G149400.Wm82.a2.v1	7.94	6.07	8.52	13.05	5.45	14.23	8.05	4.94	7.34	3.78	4.67	4.56	6.91	10.54	10.29	6.44	13.11	8.96	6.21	5.32	6.27	2.8	6.06	10.65	17	17	12	20	9	33	22	22	22	7	9	3	11	36	57	18	36	33	32	19	8	6	26	12	Chr01
Glyma.01G149500.Wm82.a2.v1	0.28	0	0	0	0	0	0	0.14	0	0	0	0	0	0.36	0	0	0	0.17	0	0	0	0	0.28	0	1	0	0	0	0	0	0	1	0	0	0	0	0	2	0	0	0	1	0	0	0	0	2	0	Chr01
Glyma.01G149700.Wm82.a2.v1	21.77	35.58	5.37	26.33	21.39	16.3	7.38	17.26	8.41	4.76	3.93	5.75	20.6	22.14	20.47	22.57	24.33	21.23	15.17	15.54	6.92	5.3	7.05	2.24	37	79	6	32	28	30	16	61	20	7	6	3	26	60	90	50	53	62	62	44	7	9	24	2	Chr01
Glyma.01G149800.Wm82.a2.v1	0.82	0.62	0.31	1.99	2.38	0.94	1.12	1.08	1.46	0	0.23	0	1.92	1.66	1.02	0.94	1.27	0.95	1.02	1.22	2.4	0.41	0.41	0.78	4	4	1	7	9	5	7	11	10	0	1	0	7	13	13	6	8	8	12	10	7	2	4	2	Chr01
Glyma.01G149900.Wm82.a2.v1	12.28	13.22	8.99	11.44	18.89	20.57	9.62	17.93	17.55	11.56	11.63	10.37	9.79	10.26	13.88	19.88	25.18	16.14	18.34	14.46	19.09	11.82	14.07	16.43	27	38	13	18	32	49	27	82	54	22	23	7	16	36	79	57	71	61	97	53	25	26	62	19	Chr01
Glyma.01G150000.Wm82.a2.v1	0	0	0	0	1.66	11.84	0	5.24	0	0	0	0	0	0	0	9.83	6.5	6.34	1.6	1.92	1.08	0	0	0	0	0	0	0	2	20	0	17	0	0	0	0	0	0	0	20	13	17	6	5	1	0	0	0	Chr01
Glyma.01G150100.Wm82.a2.v1	0	0.59	0	0	0	0.71	0	0	0	0	0	0	0	0.48	0	1.18	0	0.89	0	0	0	0	0	0	0	1	0	0	0	1	0	0	0	0	0	0	0	1	0	2	0	2	0	0	0	0	0	0	Chr01
Glyma.01G150200.Wm82.a2.v1	8.95	11.09	6.57	9.49	5.21	7.12	4.35	8.16	3.31	3.21	5.83	2.01	7.47	8.32	13.24	4.73	8.42	6.64	6.03	3.52	4.14	2.16	3.39	1.76	29	47	14	22	13	25	18	55	15	9	17	2	18	43	111	20	35	37	47	19	8	7	22	3	Chr01
Glyma.01G150300.Wm82.a2.v1	3.72	1.99	0.56	1.56	1.45	1.03	0.58	0.89	0.27	0	0.83	0	4	3.03	3.59	0.85	1.74	0.86	1.24	0.89	0	0	0	0.71	10	7	1	3	3	3	2	5	1	0	2	0	8	13	25	3	6	4	8	4	0	0	0	1	Chr01
Glyma.01G150400.Wm82.a2.v1	26.51	26.38	19.35	34.1	32.35	29.87	29.09	25.24	17.81	19.61	24.77	17.27	19.99	25.27	22.34	40.26	41.77	36.1	21.39	27.05	21.37	12.19	14.55	16.13	50	65	24	46	47	61	70	99	47	32	42	10	28	76	109	99	101	117	97	85	24	23	55	16	Chr01
Glyma.01G150500.Wm82.a2.v1	1.99	3.42	3.78	4.86	3.23	1.38	0.78	1.67	0.71	1.15	0	0	3.34	3.12	2.11	3.05	0	2.02	3.1	1.79	0	0	0.74	0	4	9	5	7	5	3	2	7	2	2	0	0	5	10	11	8	0	7	15	6	0	0	3	0	Chr01
Glyma.01G150600.Wm82.a2.v1	160.37	108	204.83	195.5	171.55	109	75.4	92.52	69.69	65.23	62.79	58.52	117.44	106.99	126.46	106.27	137.1	102.27	88.55	75.45	84.01	39.76	65.31	65.88	125	110	105	109	103	92	75	150	76	44	44	14	68	133	255	108	137	137	166	98	39	31	102	27	Chr01
Glyma.01G150700.Wm82.a2.v1	8.71	9.22	7.4	4.3	5.32	4.73	3.61	3.33	6.04	4.15	3.42	3.34	13.45	10.6	10	5.5	4.8	4.47	4.79	4.15	5.16	2.05	3.07	2.44	34	47	19	12	16	20	18	27	33	14	12	4	39	66	101	28	24	30	45	27	12	8	24	5	Chr01
Glyma.01G150800.Wm82.a2.v1	2.17	0.33	3.3	0.61	0.56	1.2	2.38	3.97	0.62	0.5	0	0	1.17	3	2.85	1.67	1.02	2.78	1.99	1.3	0	0	0.65	0	5	1	5	1	1	3	7	19	2	1	0	0	2	11	17	5	3	11	11	5	0	0	3	0	Chr01
Glyma.01G150900.Wm82.a2.v1	1.61	1.24	0	2.26	1.4	2.98	0.84	3.62	1.92	0	0.6	1.75	0.72	0.67	0.83	3.71	6.29	2.5	1.34	1.29	2.71	1.08	1.07	1.02	3	3	0	3	2	6	2	14	5	0	1	1	1	2	4	9	15	8	6	4	3	2	4	1	Chr01
Glyma.01G151100.Wm82.a2.v1	0	0	0	0	0	0	0	0	0	0	0	0	0	0	0.17	0	0	0	0	0	0	0	0	0	0	0	0	0	0	0	0	0	0	0	0	0	0	0	1	0	0	0	0	0	0	0	0	0	Chr01
Glyma.01G151300.Wm82.a2.v1	0	0	0	0	0	0	0	0	0.5	0	0	0	0.47	0	0	0.27	0	0.41	0	0	0	0	0	0	0	0	0	0	0	0	0	0	2	0	0	0	1	0	0	1	0	2	0	0	0	0	0	0	Chr01
Glyma.01G151400.Wm82.a2.v1	18.53	12.05	12.68	0	4.81	0.86	2.9	1.34	3.31	0	0	0	3.74	6.97	6.09	0	0.72	0	0.39	0	0	0	0.46	0	20	17	9	0	4	1	4	3	5	0	0	0	3	12	17	0	1	0	1	0	0	0	1	0	Chr01
Glyma.01G151600.Wm82.a2.v1	5.38	5.72	3.18	18.81	15.53	8.01	5.62	11.21	5.13	2.76	3.33	2.92	6.84	6	8.09	9.86	10.5	9.05	7.58	5.2	8.03	5.68	5.67	5.69	18	25	7	45	40	29	24	78	24	8	10	3	17	32	70	43	45	52	61	29	16	19	38	10	Chr01
Glyma.01G151700.Wm82.a2.v1	3.32	4.1	2.72	7.5	8.29	4.48	2.4	4.3	3.65	0.89	0.57	3.33	4.13	7.05	5.53	7.64	6.57	4.61	5.1	2.76	4.29	0.26	1.53	1.94	13	21	7	21	25	19	12	35	20	3	2	4	12	44	56	39	33	31	48	18	10	1	12	4	Chr01
Glyma.01G151800.Wm82.a2.v1	0.24	0.18	1.43	0.33	0.92	1.52	0.92	1.36	2.02	0.82	1.05	0.77	0	1.33	0.27	0.72	1.29	0.82	0.98	0.85	1.58	0.94	0.71	0	1	1	4	1	3	7	5	12	12	3	4	1	0	9	3	4	7	6	10	6	4	4	6	0	Chr01
Glyma.01G152000.Wm82.a2.v1	0	0	0	0	0	0	0.34	2.96	1.57	1.53	0.98	0	0	0	0	1.35	0.69	2.3	4.21	3.7	0.74	3.96	0.22	2.51	0	0	0	0	0	0	1	14	5	3	2	0	0	0	0	4	2	9	23	14	1	9	1	3	Chr01
Glyma.01G152100.Wm82.a2.v1	22.15	17.93	7.32	11.67	17.09	9.19	6.29	10.8	4.36	4.45	7.86	5.23	19.45	24.16	21.09	5.91	11.52	7.1	4.94	8.86	8.09	7.38	6.41	4.27	69	73	15	26	41	31	25	70	19	12	22	5	45	120	170	24	46	38	37	46	15	23	40	7	Chr01
Glyma.01G152200.Wm82.a2.v1	0	0	0	0	0	0	0	0	0	0	0	0	0	0.85	1.04	0	0	0	0	0	0	0	0	0	0	0	0	0	0	0	0	0	0	0	0	0	0	2	4	0	0	0	0	0	0	0	0	0	Chr01
Glyma.01G152500.Wm82.a2.v1	2.26	0	5.88	19.37	6.69	8.63	10.1	11	11.75	37.99	26.53	31.5	0.43	0.61	0.37	9.89	7.29	8.25	15.14	13.73	15.15	38.34	26.22	25.74	7	0	12	43	16	29	40	71	51	102	74	30	1	3	3	40	29	44	113	71	28	119	163	42	Chr01
Glyma.01G152700.Wm82.a2.v1	3.59	3.67	6.38	8.37	7	4.98	2.82	4.03	0.86	0	0.67	3.9	5.65	4.88	6.25	10.11	3.74	4.53	1.99	0.72	2.01	0	1.79	4.56	6	8	7	10	9	9	6	14	2	0	1	2	7	13	27	22	8	13	8	2	2	0	6	4	Chr01
Glyma.01G152800.Wm82.a2.v1	0	0.79	0	0	0	0	0	0.5	0.74	0	0	0	1.39	3.23	4.38	0	0	0	0	0	0	0	0	0	0	1	0	0	0	0	0	1	1	0	0	0	1	5	11	0	0	0	0	0	0	0	0	0	Chr01
Glyma.01G152900.Wm82.a2.v1	4.3	0.82	1.64	0	0	0.25	0	0.13	0	0	0	0	1.45	3.37	6.45	0.21	0.42	0.63	0.11	0	0	0	0.4	0	16	4	4	0	0	1	0	1	0	0	0	0	4	20	62	1	2	4	1	0	0	0	3	0	Chr01
Glyma.01G153000.Wm82.a2.v1	0.59	0.9	0	3.29	1.53	2.72	4.15	3.11	2.1	0	0.65	1.92	1.58	1.48	0.91	1.35	0.92	3.08	1.71	4.24	6.92	1.77	1.17	1.12	1	2	0	4	2	5	9	11	5	0	1	1	2	4	4	3	2	9	7	12	7	3	4	1	Chr01
Glyma.01G153100.Wm82.a2.v1	0.55	1.9	0.84	1.16	3.94	2.04	0.43	2.39	0.79	0	0.31	0	0	0.52	0.64	2.12	2.37	1.6	0.92	0.83	0.46	0	0.14	1.05	2	9	2	3	11	8	2	18	4	0	1	0	0	3	6	10	11	10	8	5	1	0	1	2	Chr01
Glyma.01G153200.Wm82.a2.v1	8.37	7.5	6.52	10.84	9.01	13.95	17.59	18.84	14.44	24.29	23.15	24.6	7.69	8.7	9.23	10.33	11.94	11.52	14.25	14.08	15.76	33.26	24.34	27.55	41	48	21	38	34	74	110	192	99	103	102	37	28	68	117	66	75	97	168	115	46	163	239	71	Chr01
Glyma.01G153300.Wm82.a2.v1	2.1	0.8	2.13	9.78	2.27	1.94	3.01	0.84	1.25	2.42	2.33	5.7	1.88	1.53	1.62	1.61	0.82	2.03	2.47	0.84	1.76	2.45	2.62	1.99	6	3	4	20	5	6	11	5	5	6	6	5	4	7	12	6	3	10	17	4	3	7	15	3	Chr01
Glyma.01G153600.Wm82.a2.v1	3.85	2.5	4.51	4.97	5.39	4.11	1.16	5.13	2.33	0.69	1.32	2.9	2.79	6.14	4.81	4.55	5.09	3.62	2.59	1.78	0.5	0.89	1.48	1.13	13	11	10	12	14	15	5	36	11	2	4	3	7	33	42	20	22	21	21	10	1	3	10	2	Chr01
Glyma.01G153700.Wm82.a2.v1	0	0.18	0	0	0	0.64	0	0.11	0.16	0	0	0	0	0.58	0.18	1.06	0.18	0.93	0.19	0.55	0	0	0	0.44	0	1	0	0	0	3	0	1	1	0	0	0	0	4	2	6	1	7	2	4	0	0	0	1	Chr01
Glyma.01G153900.Wm82.a2.v1	0	0	0	0.62	0	0.41	0	0	0	0	0	0	0	0	0	0	0	0	0	0	0	0	0	0	0	0	0	1	0	1	0	0	0	0	0	0	0	0	0	0	0	0	0	0	0	0	0	0	Chr01
Glyma.01G154000.Wm82.a2.v1	1.29	1.48	0.98	7.2	0.84	6.54	4.04	6.5	6.44	4.46	3.58	2.1	1.73	0.4	1.24	7.9	4.02	5.99	5.09	6.18	3.24	1.93	8.99	3.67	2	3	1	8	1	11	8	21	14	6	5	1	2	1	5	16	8	16	19	16	3	3	28	3	Chr01
Glyma.01G154100.Wm82.a2.v1	13.85	8.7	15.04	15.9	15.41	7.76	5.43	11.17	7.07	2.86	9.35	1.61	9.32	12.09	13.76	10.62	12.34	11.8	7.4	7.12	9.96	6.92	6.42	11.29	28	23	20	23	24	17	14	47	20	5	17	1	14	39	72	28	32	41	36	24	12	14	26	12	Chr01
Glyma.01G154200.Wm82.a2.v1	53.41	62.01	47.6	84.96	100.41	97.78	52.67	63.3	67.78	28.73	12.29	62.99	50.82	53.69	44.13	150.42	116.35	91.61	57.04	52.49	111.32	33.14	46.87	35.02	58	88	34	66	84	115	73	143	103	27	12	21	41	93	124	213	162	171	149	95	72	36	102	20	Chr01
Glyma.01G154300.Wm82.a2.v1	6.53	6.24	24.81	14.6	7.2	9.64	8.18	9.57	6.3	5.28	4.36	8.5	5.27	3.48	5.42	11.51	7.13	6.08	7.19	5.48	11.51	3.59	4.56	4.96	20	25	50	32	17	32	32	61	27	14	12	8	12	17	43	46	28	32	53	28	21	11	28	8	Chr01
Glyma.01G154400.Wm82.a2.v1	6.12	6.33	0.93	0	0	0	0.72	0	0	0	0	0	3.3	7.1	5.33	0	0	0	0	0	0	0	0	0	20	27	2	0	0	0	3	0	0	0	0	0	8	37	45	0	0	0	0	0	0	0	0	0	Chr01
Glyma.01G154700.Wm82.a2.v1	4.47	3.04	0.75	4.16	4.51	3.89	1.36	4.53	1.77	1.43	0	0	3.67	4.04	2.4	4.57	3.29	2.6	3.3	2.38	0.83	0.25	1.98	0	18	16	2	12	14	17	7	38	10	5	0	0	11	26	25	24	17	18	32	16	2	1	16	0	Chr01
Glyma.01G154900.Wm82.a2.v1	17.92	15.46	4.95	4.56	3.38	4.51	0.77	2.98	0.7	0.75	1.45	1.06	17.99	19.82	15.87	3.25	5.08	4.93	5.42	2.93	0.55	1.3	0.49	1.24	55	62	10	10	8	15	3	19	3	2	4	1	41	97	126	13	20	26	40	15	1	4	3	2	Chr01
Glyma.01G155000.Wm82.a2.v1	1.71	1.31	0.65	2.39	1.11	0.39	0.33	1.23	0.31	0	0	2.78	1.72	1.07	0.66	0.65	1.33	0.5	1.24	1.02	0	1.28	0.43	0	4	4	1	4	2	1	1	6	1	0	0	2	3	4	4	2	4	2	7	4	0	3	2	0	Chr01
Glyma.01G155200.Wm82.a2.v1	2.77	2.36	2.81	3.87	5.59	4.55	1.93	3.85	1.32	1.07	2.05	2.01	8.29	5.4	4.76	6.14	7.2	5.91	3.2	2.4	3.62	1.85	1.38	1.17	9	10	6	9	14	16	8	26	6	3	6	2	20	28	40	26	30	33	25	13	7	6	9	2	Chr01
Glyma.01G155300.Wm82.a2.v1	5.86	6.4	1.78	5.15	6.95	9.27	3.54	5.47	4.19	1.35	4.1	1.09	8.79	8.92	7.25	5.26	5.48	7.21	5.01	3.31	2.25	2.18	2.59	2.55	35	50	7	22	32	60	27	68	35	7	22	2	39	85	112	41	42	74	72	33	8	13	31	8	Chr01
Glyma.01G155400.Wm82.a2.v1	3.3	2.11	0	21.55	17.15	9.66	7.77	4.23	2.75	2.54	4.29	7.17	2.96	3.8	2.98	8.44	11.16	5.77	5.04	2.31	5.55	2.75	2.2	5.23	6	5	0	28	24	19	18	16	7	4	7	4	4	11	14	20	26	18	22	7	6	5	8	5	Chr01
Glyma.01G155600.Wm82.a2.v1	1.1	1.26	1.67	1.15	1.43	0.51	0.43	0.4	0.2	0	1.22	0	1.11	2.93	1.7	0.21	0.64	0.48	0.34	0.33	0	0.28	0	1.05	4	6	4	3	4	2	2	3	1	0	4	0	3	17	16	1	3	3	3	2	0	1	0	2	Chr01
Glyma.01G155800.Wm82.a2.v1	4.58	3	3.98	11.89	4.25	3.62	6.66	4.72	5.14	2.27	2.18	0	7.92	4.1	4.55	6.02	5.1	5.33	5.44	5.1	7.69	5.89	4.57	1.24	7	6	4	13	5	6	13	15	11	3	3	0	9	10	18	12	10	14	20	13	7	9	14	1	Chr01
Glyma.01G155900.Wm82.a2.v1	0.97	1.66	5.87	0.34	0.94	0.22	0	0	0.17	0	0	0	1.95	1.36	3.08	0.93	0	0.28	0.4	0	0.41	0.24	0	0	4	9	16	1	3	1	0	0	1	0	0	0	6	9	33	5	0	2	4	0	1	1	0	0	Chr01
Glyma.01G156000.Wm82.a2.v1	13.5	5.16	5.77	7.08	7.67	4.28	3.64	7.71	4.52	5.36	3.75	4.12	11.36	7.4	8.64	7.12	5.26	8.83	7.19	9.62	12.75	5.9	5.05	6.42	32	16	9	12	14	11	11	38	15	11	8	3	20	28	53	22	16	36	41	38	18	14	24	8	Chr01
Glyma.01G156200.Wm82.a2.v1	8.27	8.76	10.64	0.44	0.41	0	0.25	0.31	0	0	0	0	11.13	9.37	17.71	0.98	0.25	0.37	0.4	0.19	0.53	0.32	0.16	0	26	36	22	1	1	0	1	2	0	0	0	0	26	47	144	4	1	2	3	1	1	1	1	0	Chr01
Glyma.01G156400.Wm82.a2.v1	1.78	2.5	2.26	3.32	1.93	6.03	3.95	3.28	3.6	2.06	4.29	0.97	3.19	2.42	1.26	3.64	6.25	7.08	3.33	5.34	3.98	1.48	2.22	1.69	6	11	5	8	5	22	17	23	17	6	13	1	8	13	11	16	27	41	27	30	8	5	15	3	Chr01
Glyma.01G156500.Wm82.a2.v1	0	1.27	0	0	0	0	0	0	0	0	0	0	1.12	0	1.28	0.64	0.65	0.96	0.69	0	0	0	0	0	0	2	0	0	0	0	0	0	0	0	0	0	1	0	4	1	1	2	2	0	0	0	0	0	Chr01
Glyma.01G156600.Wm82.a2.v1	11.48	20.38	16.76	9.63	17.29	16.96	4.32	13.69	5.91	6.9	2.04	1.5	12.98	21.6	15.8	19.72	24	15.23	8.4	6.61	10.02	1.84	3.21	3.49	25	58	24	15	29	40	12	62	18	13	4	1	21	75	89	56	67	57	44	24	13	4	14	4	Chr01
Glyma.01G156700.Wm82.a2.v1	2.08	1.86	9.49	0.97	0.45	0.32	0.27	0.5	0	0.4	0.77	0	3.27	1.74	2.28	0.27	0.81	0.2	0.86	0.62	0.58	0	0.35	0	6	7	18	2	1	1	1	3	0	1	2	0	7	8	17	1	3	1	6	3	1	0	2	0	Chr01
Glyma.01G156800.Wm82.a2.v1	1.43	2.18	0.36	0	0.93	0.88	0.19	0.57	0.17	0	0.26	0	0.32	0.89	0.64	0.73	0	0.69	0.49	0.57	0	0.24	0.24	0	6	12	1	0	3	4	1	5	1	0	1	0	1	6	7	4	0	5	5	4	0	1	2	0	Chr01
Glyma.01G157000.Wm82.a2.v1	9.39	6.08	7.32	3.03	5.32	4.89	5.47	5.21	2.75	3.62	2.14	1.57	11.35	11.78	7.54	7.39	7.51	5.89	5.21	4.91	8.09	1.93	2.64	5.5	39	33	20	9	17	22	29	45	16	13	8	2	35	78	81	40	40	42	52	34	20	8	22	12	Chr01
Glyma.01G157100.Wm82.a2.v1	1.38	4.57	0.7	2.57	1.19	0.42	0.36	0.88	0.66	0	0	0	2.47	1.15	0.53	1.76	1.08	1.07	0.38	0	0	0	0.23	0	3	13	1	4	2	1	1	4	2	0	0	0	4	4	3	5	3	4	2	0	0	0	1	0	Chr01
Glyma.01G157200.Wm82.a2.v1	0.3	0.23	0	0	2.36	0	0	0	0	0	0	0	0	0	0.23	0.23	0.47	0.18	0	0	0	0	0	0	1	1	0	0	6	0	0	0	0	0	0	0	0	0	2	1	2	1	0	0	0	0	0	0	Chr01
Glyma.01G157300.Wm82.a2.v1	6.21	12.48	3.54	0.72	0	1.2	1.62	1	1.48	0.3	0	0	9.76	10.39	12.41	1.99	2.22	2.26	0.75	1.24	0.87	0	0.78	0	24	63	9	2	0	5	8	8	8	1	0	0	28	64	124	10	11	15	7	8	2	0	6	0	Chr01
Glyma.01G157400.Wm82.a2.v1	14.8	14.86	44.3	17.45	17.41	8.54	6.16	9.78	5.29	2.14	2.57	1.51	19.3	14.79	17.7	14.19	12.26	7.26	12.3	4.16	11.65	6.47	2.77	2.64	32	42	63	27	29	20	17	44	16	4	5	1	31	51	99	40	34	27	64	15	15	14	12	3	Chr01
Glyma.01G157500.Wm82.a2.v1	1.52	1.16	2.31	1.28	0	0.28	0.71	0.44	0	0	0.68	0	1.64	0.95	1.06	0.23	1.19	0.35	0.25	0.73	1.02	0.61	0	0.58	5	5	5	3	0	1	3	3	0	0	2	0	4	5	9	1	5	2	2	4	2	2	0	1	Chr01
Glyma.01G157600.Wm82.a2.v1	14.59	17.62	1.17	7.51	8.97	20.56	15.64	19.19	14.81	6.21	5.98	5	13.43	14.44	10.68	25.32	20.96	24.12	15.96	9.67	18.04	3.07	2.68	1.46	19	30	1	7	9	29	26	52	27	7	7	2	13	30	36	43	35	54	50	21	14	4	7	1	Chr01
Glyma.01G157700.Wm82.a2.v1	0	0	0	0	0	0	0	0	0	0.29	0	0	0	0	0	0	0	0	0	0	0	0	0	0	0	0	0	0	0	0	0	0	0	1	0	0	0	0	0	0	0	0	0	0	0	0	0	0	Chr01
Glyma.01G157800.Wm82.a2.v1	1.11	0	2.36	4.95	2.3	1.23	2.08	2.24	1.27	1.28	0.49	0	3.28	2.92	3.34	2.55	3.11	2.32	2.49	1.46	0.37	1.55	1.88	1.26	5	0	7	16	8	6	12	21	8	5	2	0	11	21	39	15	18	18	27	11	1	7	17	3	Chr01
Glyma.01G157900.Wm82.a2.v1	3.5	2.83	2.66	1.9	1.01	1.08	0.61	1.87	0.42	0.22	0	0	5.24	3.17	5.11	1.34	1.06	1.47	0.65	0.7	1.63	0.19	0.39	0	18	19	9	7	4	6	4	20	3	1	0	0	20	26	68	9	7	13	8	6	5	1	4	0	Chr01
Glyma.01G158000.Wm82.a2.v1	1.04	0.53	0.53	0	0.45	0.64	0	0.33	0	0	0	0	0.47	0.87	0.13	1.33	0	1.01	0.14	0	0.58	0.35	0	0	3	2	1	0	1	2	0	2	0	0	0	0	1	4	1	5	0	5	1	0	1	1	0	0	Chr01
Glyma.01G158100.Wm82.a2.v1	0.98	0	0	0.46	1.28	0	0.26	0.47	0	0	0	0	0.44	0.82	0.38	0	0	0.19	0.82	0	0	0	0.16	0	3	0	0	1	3	0	1	3	0	0	0	0	1	4	3	0	0	1	6	0	0	0	1	0	Chr01
Glyma.01G158200.Wm82.a2.v1	6.17	6.39	14.35	2.54	1.41	0.67	0.28	2.79	0.52	1.26	1.21	0	9.77	11.15	8.56	2.23	3.11	1.9	1.06	1.96	2.44	1.09	0.72	1.38	17	23	26	5	3	2	1	16	2	3	3	0	20	49	61	8	11	9	7	9	4	3	4	2	Chr01
Glyma.01G158300.Wm82.a2.v1	3.78	4.92	2.88	10.58	6.39	5.59	6.23	8.19	5.68	7	3.79	1.23	5.6	4.27	5.12	5.81	5.61	7.27	7.71	6.59	8.9	4.16	5.67	7.92	10	17	5	20	13	16	21	45	21	16	9	1	11	18	35	20	19	33	49	29	14	11	30	11	Chr01
Glyma.01G158400.Wm82.a2.v1	2.49	1.9	3.24	8.19	6.92	7.21	6.12	5.63	9.77	4.92	7.51	13.88	3.35	1.56	1.24	10.89	6.51	5.89	5.24	6.07	8.35	6.21	7.09	7.43	14	14	12	33	30	44	44	66	77	24	38	24	14	14	18	80	47	57	71	57	28	35	80	22	Chr01
Glyma.01G158500.Wm82.a2.v1	11.02	12.1	15.31	13.4	16.18	15.05	4.88	9.91	7.88	11.63	6.93	4.68	9.03	9.02	7.78	12.5	11.59	15.06	8.17	8.34	9.66	2.88	8.37	10.94	23	33	21	20	26	34	13	43	23	21	13	3	14	30	42	34	31	54	41	29	12	6	35	12	Chr01
Glyma.01G158600.Wm82.a2.v1	4.79	4.83	3.2	1.61	0.75	0.71	0.75	0.28	0.41	0.44	0.21	0.62	6.7	9.6	8.81	2.5	1.05	0.78	0.64	1.03	1.61	0.77	1.05	0.36	25	33	11	6	3	4	5	3	3	2	1	1	26	80	119	17	7	7	8	9	5	4	11	1	Chr01
Glyma.01G158700.Wm82.a2.v1	0	0	0	0.99	0.92	0	0	0.17	0	0	0	0	0.47	0	0.14	0.54	0	0	0	0	0	0	0	0	0	0	0	2	2	0	0	1	0	0	0	0	1	0	1	2	0	0	0	0	0	0	0	0	Chr01
Glyma.01G158800.Wm82.a2.v1	8	5.25	4.35	8.79	7.42	4.75	4.48	6.32	6.13	2.64	0.64	3.72	3.85	4.3	3.53	7.01	9.36	6.32	7.84	3.09	6.72	4	2.57	4.35	14	12	5	11	10	9	10	23	15	4	1	2	5	12	16	16	21	19	33	9	7	7	9	4	Chr01
Glyma.01G158900.Wm82.a2.v1	0	0	0	0.99	0	0	0	0	0	0	0	0	0	0	0.27	0	0	0	0	0	0	0	0	0	0	0	0	1	0	0	0	0	0	0	0	0	0	0	1	0	0	0	0	0	0	0	0	0	Chr01
Glyma.01G159000.Wm82.a2.v1	9.09	6.48	2.38	7.01	8.14	4.63	2.7	4.98	2.69	1.09	1.4	0	4.22	8.65	11.03	6.74	6.6	5.11	3.26	2.63	5.27	2.51	1.88	0	29	27	5	16	20	16	11	33	12	3	4	0	10	44	91	28	27	28	25	14	10	8	12	0	Chr01
Glyma.01G159200.Wm82.a2.v1	1.71	1.31	1.3	8.96	13.87	9.47	11.05	14.79	8.55	3.46	4.75	6.96	0.58	2.14	1.32	15.08	12.34	13.18	15.82	9.23	12.2	7.69	7.89	9.75	4	4	2	15	25	24	33	72	28	7	10	5	1	8	8	46	37	53	89	36	17	18	37	12	Chr01
Glyma.01G159400.Wm82.a2.v1	8.57	14.03	3.15	5.37	8.06	4.1	2.09	4.41	1.27	2.05	0.33	0.96	16.32	10.38	12	7.48	6	4.99	2.21	2.48	2.48	1.18	0.89	1.69	29	62	7	13	21	15	9	31	6	6	1	1	41	56	105	33	26	29	18	14	5	4	6	3	Chr01
Glyma.01G159500.Wm82.a2.v1	21.9	18.76	14.91	15.99	22.07	13.89	9.22	15.4	12.85	6.42	4	11.71	14.96	22.55	26.15	18.05	16.06	17.5	14.54	16.48	10.98	9.8	7.67	3.73	67	75	30	35	52	46	36	98	55	17	11	11	34	110	207	72	63	92	107	84	20	30	47	6	Chr01
Glyma.01G159600.Wm82.a2.v1	1.19	1.64	1.09	1.33	2.48	1.54	0.75	1.03	0.68	0	0	0	0.96	1.2	1.2	2.38	1.3	1.53	0.69	0.43	1.2	0.95	0.71	1.81	5	9	3	4	8	7	4	9	4	0	0	0	3	8	13	13	7	11	7	3	3	4	6	4	Chr01
Glyma.01G159700.Wm82.a2.v1	3.38	8.91	0.57	11.03	9.26	15.61	2.06	7.22	4.03	1.3	1.25	1.22	5.06	5.65	6.97	11.81	22.26	9.83	4.37	3.83	2.52	0.38	0.75	1.43	9	31	1	21	19	45	7	40	15	3	3	1	10	24	48	41	76	45	28	17	4	1	4	2	Chr01
Glyma.01G159800.Wm82.a2.v1	41.61	54.9	14.73	39.11	33.99	38.75	20.24	21.56	14.36	5.39	13.17	1.17	44.9	37.78	43.26	33.29	39.73	30.47	22.07	20.45	14.45	6.1	7.7	12.96	116	200	27	78	73	117	72	125	56	13	33	1	93	168	312	121	142	146	148	95	24	17	43	19	Chr01
Glyma.01G159900.Wm82.a2.v1	5.08	4.5	7.72	3.74	5.21	2.22	3.14	3.6	4.2	2.16	1.49	4.35	3.96	5.7	8.47	6.77	3.13	4.36	3.89	5.29	2.69	0.8	3.47	3.05	19	22	19	10	15	9	15	28	22	7	5	5	11	34	82	33	15	28	35	33	6	3	26	6	Chr01
Glyma.01G160000.Wm82.a2.v1	1.27	0.65	1.29	0.59	0	0.39	0.66	0.41	1.51	0	0	0	2.28	1.86	0.65	0.97	0.33	1.23	0.53	0.51	0.71	0.42	0	0	3	2	2	1	0	1	2	2	5	0	0	0	4	7	4	3	1	5	3	2	1	1	0	0	Chr01
Glyma.01G160100.Wm82.a2.v1	45.16	21.35	76.75	0	0	0	0	0	0	0	0	0	49.17	57.88	106.28	0	0	0	1.1	0	0	0	0	0	68	42	76	0	0	0	0	0	0	0	0	0	55	139	414	0	0	0	4	0	0	0	0	0	Chr01
Glyma.01G160300.Wm82.a2.v1	3.7	3.36	0.35	0.97	5.7	8.75	1.99	4.11	0.83	0.27	0.77	0.75	2.49	1.01	0.98	5.32	7.57	2.42	1.35	1.66	1.94	0.23	0.46	0.44	16	19	1	3	19	41	11	37	5	1	3	1	8	7	11	30	42	18	14	12	5	1	4	1	Chr01
Glyma.01G160900.Wm82.a2.v1	0	0.52	0	0	0	0	0.53	0	0	0	0	0	0	0	0	0	0	0	0	0	0	0	0	0	0	1	0	0	0	0	1	0	0	0	0	0	0	0	0	0	0	0	0	0	0	0	0	0	Chr01
Glyma.01G161100.Wm82.a2.v1	0.28	0.65	1.72	0.4	0	0	0	0	0	0	0	0	0	0.53	0.88	0	0	0	0	0	0	0	0	0	1	3	4	1	0	0	0	0	0	0	0	0	0	3	8	0	0	0	0	0	0	0	0	0	Chr01
Glyma.01G161200.Wm82.a2.v1	53.52	32.01	47.7	37.84	26.35	23.29	8.19	20.7	13.63	10.66	8.9	6.01	63.76	55.16	52.07	17.93	27.35	24.7	25.32	17.72	21.69	12.3	17.5	7.02	87	68	51	44	33	41	17	70	31	15	13	3	77	143	219	38	57	69	99	48	21	20	57	6	Chr01
Glyma.01G161400.Wm82.a2.v1	0.46	0	0	0.64	0	0	0	0	0	0	0	0	0	0.29	0	0	0	0.26	0.19	0	0	0.46	0	0	1	0	0	1	0	0	0	0	0	0	0	0	0	1	0	0	0	1	1	0	0	1	0	0	Chr01
Glyma.01G161500.Wm82.a2.v1	13.63	1.65	58.9	153.44	0	0	1.12	3.45	0.51	0	0	0	0.97	1.35	8.32	0	0	0.83	0.3	0.43	0	0	1.07	2.73	19	3	54	153	0	0	2	10	1	0	0	0	1	3	30	0	0	2	1	1	0	0	3	2	Chr01
Glyma.01G161600.Wm82.a2.v1	5.43	5.78	5.05	12.66	7.84	8.08	3.08	5.95	1.51	2.79	2.35	0.98	12.6	3.03	7	7.64	7.53	4.57	5.27	5.43	4.05	1.81	3.16	2.87	18	25	11	30	20	29	13	41	7	8	7	1	31	16	60	33	32	26	42	30	8	6	21	5	Chr01
Glyma.01G161700.Wm82.a2.v1	16.9	20.42	12.17	19.9	18.48	17.25	4.88	12.4	4.77	2.06	4.45	7.24	11.97	19.24	21.66	7.5	9.37	11.65	4.81	10.14	5.23	5.78	2.66	2.54	38	60	18	32	32	42	14	58	15	4	9	5	20	69	126	22	27	45	26	38	7	13	12	3	Chr01
Glyma.01G161800.Wm82.a2.v1	2.68	4.33	5.89	5.41	2.32	4.4	1.87	3.29	3.41	2.07	1.66	1.94	2.41	2.24	1.15	2.28	1.39	1.04	0.99	0.71	1	0.89	0.59	0.57	9	19	13	13	6	16	8	23	16	6	5	2	6	12	10	10	6	6	8	4	2	3	4	1	Chr01
Glyma.01G161900.Wm82.a2.v1	3.05	3	3.32	3.05	1.7	4.83	0.68	3.57	1.56	2.52	2.91	1.42	2.94	3.56	3.2	2.34	4.08	3.3	2.36	2.36	2.2	1.31	1.09	0.83	7	9	5	5	3	12	2	17	5	5	6	1	5	13	19	7	12	13	13	9	3	3	5	1	Chr01
Glyma.01G162000.Wm82.a2.v1	36.28	42.37	39.68	42.71	45.45	33.5	31.42	33.05	34.57	20.59	18.41	33.18	41.13	35.12	41.82	35.15	45.67	24.44	31.76	28.26	25.65	17.82	26.68	27.84	57	87	41	48	55	57	63	108	76	28	26	16	48	88	170	72	92	66	120	74	24	28	84	23	Chr01
Glyma.01G162100.Wm82.a2.v1	16.19	14.58	9.78	9.32	8.96	10.33	2.43	8.7	6.13	7.7	5.3	3.88	11.54	12.54	14.27	8.4	8.54	8.87	4.46	6.14	2.8	5.71	4.28	9.51	68	80	27	28	29	47	13	76	36	28	20	5	36	84	155	46	46	64	45	43	7	24	36	21	Chr01
Glyma.01G162200.Wm82.a2.v1	1.09	1.2	2.39	2.03	3.14	2.12	1.99	1.8	1.99	1.54	1.48	1.18	1.63	1.67	1.82	1.67	3.11	1.55	2.71	2.1	1.62	1.33	1.75	0.69	9	13	13	12	20	19	21	31	23	11	11	3	10	22	39	18	33	22	54	29	8	11	29	3	Chr01
Glyma.01G162300.Wm82.a2.v1	2.59	1.98	0	2.9	2.69	2.87	1.22	1.99	1.48	2.4	0.58	3.38	0.7	3.25	5.81	1.99	4.05	2.41	1.51	2.8	0.87	0.52	1.55	1.97	5	5	0	4	4	6	3	8	4	4	1	2	1	10	29	5	10	8	7	9	1	1	6	2	Chr01
Glyma.01G162500.Wm82.a2.v1	8.75	10.04	9.97	0	0	1.35	0.57	0	0	0.84	0.81	0	17.66	27.87	26.48	0	0	0	0.61	0.44	0	0.73	0.73	1.39	12	18	9	0	0	2	1	0	0	1	1	0	18	61	94	0	0	0	2	1	0	1	2	1	Chr01
Glyma.01G162700.Wm82.a2.v1	25.57	22.52	10.27	18.21	20.67	10.69	10.96	15.77	11.72	7.81	5.9	12.57	20.78	34.49	32.26	17.39	20.32	18.25	14.04	17.37	8.91	12.54	9.63	13.76	53	61	14	27	33	24	29	68	34	14	11	8	32	114	173	47	54	65	70	60	11	26	40	15	Chr01
Glyma.01G162800.Wm82.a2.v1	18.44	19.26	8.25	30.93	29.29	23.24	9.35	21.48	8.22	5.26	7.96	3.53	18.4	21.22	19.2	17.97	17.94	20.32	13.44	11.72	7.65	9.76	8.55	11.14	85	116	25	102	104	116	55	206	53	21	33	5	63	156	229	108	106	161	149	90	21	45	79	27	Chr01
Glyma.01G162900.Wm82.a2.v1	6.85	12.51	20.04	6.63	7.53	11.2	10.74	9.89	13.56	6.09	7.04	10.31	12.77	10.91	8.97	25.47	17.27	15.03	11.4	16.13	15.05	7.38	10.79	6.02	13	31	25	9	11	23	26	39	36	10	12	6	18	33	44	63	42	49	52	51	17	14	41	6	Chr01
Glyma.01G163000.Wm82.a2.v1	4.29	2.26	0.41	0	0	0	0.21	0.13	0	0	0	0	1.08	4.71	4.56	0.21	0	0	0.33	0	0.9	0	0	0	16	11	1	0	0	0	1	1	0	0	0	0	3	28	44	1	0	0	3	0	2	0	0	0	Chr01
Glyma.01G163100.Wm82.a2.v1	70.45	23.81	72.29	0.6	0.56	0	0.68	1.45	0.31	1.5	0	0	45.96	68.02	135.15	1.33	0	0.25	0.72	1.56	2.18	0.43	0.22	1.64	163	72	110	1	1	0	2	7	1	3	0	0	79	251	809	4	0	1	4	6	3	1	1	2	Chr01
Glyma.01G163200.Wm82.a2.v1	4.11	3.6	11.61	7.39	6.1	6.51	6.45	3.95	3.78	2.72	3.92	1.91	3.16	7.74	4.32	6.31	5.04	5.13	4.15	2.47	3.95	1.17	2.05	0	7	8	13	9	8	12	14	14	9	4	6	1	4	21	19	14	11	15	17	7	4	2	7	0	Chr01
Glyma.01G163300.Wm82.a2.v1	18.55	5.64	2.17	7.32	12.97	10.32	13.05	8.23	3.06	3.57	6.35	3.1	9.29	9.99	8.83	13.87	13.54	10.93	6.43	7.28	6.79	5.23	7.48	4.52	78	31	6	22	42	47	70	72	18	13	24	4	29	67	96	76	73	79	65	51	17	22	63	10	Chr01
Glyma.01G163600.Wm82.a2.v1	3.92	3	19.09	0	1.02	2.17	3.08	2.64	3.93	2.72	0.87	0	6.34	0.49	4.55	1.2	0.61	1.83	1.63	0.47	6.59	0	1.96	1.49	5	5	16	0	1	3	5	7	7	3	1	0	6	1	15	2	1	4	5	1	5	0	5	1	Chr01
Glyma.01G163700.Wm82.a2.v1	8.93	7.18	14.26	19.98	8.12	21.86	13.65	18.04	14.05	11.36	10.93	10.19	8.42	12.32	8.11	16.79	15.68	14.55	16.16	16.62	11.25	11.16	11.59	8.49	20	21	21	32	14	53	39	84	44	22	22	7	14	44	47	49	45	56	87	62	15	25	52	10	Chr01
Glyma.01G163800.Wm82.a2.v1	2.74	6.06	3.24	4.26	5.93	3.09	2.15	4.25	2.18	1.06	0.68	0	0.82	2.1	3.65	6.54	3.33	2.66	2.66	0.73	4.09	0.3	1.67	1.16	9	26	7	10	15	11	9	29	10	3	2	0	2	11	31	28	14	15	21	4	8	1	11	2	Chr01
Glyma.01G163900.Wm82.a2.v1	190.02	189.54	197.26	224.42	190.54	190.6	162.77	184.91	151.73	109.79	122.44	115.27	232.86	225.15	246.93	208.56	210.57	232.56	159.65	138.79	149.62	130.36	142.89	138.31	290	378	198	245	224	315	317	587	324	145	168	54	264	548	975	415	412	610	586	353	136	199	437	111	Chr01
Glyma.01G164000.Wm82.a2.v1	17.42	17.23	20.09	28.54	26.51	22.46	10.12	18.33	14.38	9.72	11.69	18.59	30.72	20.9	21.24	35.93	29.98	22.89	14.36	18.56	16.13	17.11	15.13	13.7	58	75	44	68	68	81	43	127	67	28	35	19	76	111	183	156	128	131	115	103	32	57	101	24	Chr01
Glyma.01G164100.Wm82.a2.v1	16.33	14.92	8.89	16.35	21.52	19.36	13.56	14.53	12.19	6.48	5.42	8.73	12.47	11.61	11.59	17.95	18.25	12.76	9.53	7.61	14.32	5.36	9.97	9.73	67	80	24	48	68	86	71	124	70	23	20	11	38	76	123	96	96	90	94	52	35	22	82	21	Chr01
Glyma.01G164200.Wm82.a2.v1	22.9	27.88	23.74	30.56	29.73	25.95	13.87	29.28	20.83	6.62	14.47	11.87	27.33	26.76	22.53	35.93	33.7	31.49	30.73	26.23	25.34	14.05	15.32	9.9	44	70	30	42	44	54	34	117	56	11	25	7	39	82	112	90	83	104	142	84	29	27	59	10	Chr01
Glyma.01G164300.Wm82.a2.v1	22.92	21.18	19.73	22.97	14.6	28.35	11.52	18.5	9.89	6.5	10.58	11.27	20.96	22.24	20.06	20.23	28.67	21.39	18.16	7.01	13.8	12.54	10.57	12.34	53	64	30	38	26	71	34	89	32	13	22	8	36	82	120	61	85	85	101	27	19	29	49	15	Chr01
Glyma.01G164400.Wm82.a2.v1	1.96	3.5	2.98	1.83	2.54	2.41	0.51	0.94	3.27	0	1.45	0	0.88	2.46	1.77	2.5	4.07	1.14	0.81	0.78	2.19	1.31	0.98	2.48	3	7	3	2	3	4	1	3	7	0	2	0	1	6	7	5	8	3	3	2	2	2	3	2	Chr01
Glyma.01G164500.Wm82.a2.v1	0	0.22	0	3.23	1.12	3.47	4.07	4.17	5.16	2	2.89	0.94	0.39	0.18	0	5.32	4.05	3.7	5.04	4.85	4.36	3.75	2.88	2.2	0	1	0	8	3	13	18	30	25	6	9	1	1	1	0	24	18	22	42	28	9	13	20	4	Chr01
Glyma.01G164600.Wm82.a2.v1	0.69	0	3.17	0.97	0.9	0	0	0	0	0	0	0	0.93	2.18	1.61	0	0.54	0.81	0	0	0	0	0	0	1	0	3	1	1	0	0	0	0	0	0	0	1	5	6	0	1	2	0	0	0	0	0	0	Chr01
Glyma.01G164700.Wm82.a2.v1	3.04	3.26	2.78	0.85	0	0	0.95	0	0.43	0	0	0	6.55	4.58	5.64	0	0.95	1.06	0	0	0	0	0.3	0	5	7	3	1	0	0	2	0	1	0	0	0	8	12	24	0	2	3	0	0	0	0	1	0	Chr01
Glyma.01G164800.Wm82.a2.v1	0.18	0.27	0.27	0.74	0.23	1.3	0.55	0.76	0.38	0.2	0.78	0	0.71	0	0	1.75	0.27	0.92	0.8	0.63	0.88	1.23	1.05	0.67	1	2	1	3	1	8	4	9	3	1	4	0	3	0	0	13	2	9	11	6	3	7	12	2	Chr01
Glyma.01G164900.Wm82.a2.v1	0.77	3.23	0	0.54	1.99	0	0	0.55	0	0	0	0	1.55	0.96	1.34	0.59	0.9	0.89	0.32	0	0	0	0	0	2	11	0	1	4	0	0	3	0	0	0	0	3	4	9	2	3	4	2	0	0	0	0	0	Chr01
Glyma.01G165000.Wm82.a2.v1	0.64	0.16	0	0.89	2.77	0.79	0	0.62	0.15	0	0	0	0.86	0.8	0.16	2.29	2	1.24	0.09	0	0	0	0	0	3	1	0	3	10	4	0	6	1	0	0	0	3	6	2	14	12	10	1	0	0	0	0	0	Chr01
Glyma.01G165100.Wm82.a2.v1	11.56	13.01	7.75	17.58	11.03	16.95	11.45	10.79	8.99	4.32	5.67	8.86	12.81	13	12.61	18.51	12.73	15.62	11.02	10.81	8.56	4.76	7.29	3.23	34	50	15	37	25	54	43	66	37	11	15	8	28	61	96	71	48	79	78	53	15	14	43	5	Chr01
Glyma.01G165200.Wm82.a2.v1	3.82	1.22	0	0.89	1.24	0.29	0.25	1.23	0	0	0	0	3.43	2.6	3.45	1.22	0.25	0.74	0.53	0.38	1.07	0.32	0	0	12	5	0	2	3	1	1	8	0	0	0	0	8	13	28	5	1	4	4	2	2	1	0	0	Chr01
Glyma.01G165300.Wm82.a2.v1	21.99	15.39	16.24	14.05	12.24	10.44	14.77	6.34	5.39	10.16	6.29	8.19	22.84	27.58	30.36	6.26	7.35	4.75	5.22	6.41	4.22	8.17	7.21	7.17	35	32	17	16	15	18	30	21	12	14	9	4	27	70	125	13	15	13	20	17	4	13	23	6	Chr01
Glyma.01G165400.Wm82.a2.v1	23.58	19.33	17.93	1.77	2.73	1.56	0.33	0.81	2.11	0.97	0.47	0	36.27	24.02	30.27	1.29	0.99	1.96	3.15	1.01	0	0.42	0.63	1.6	56	60	28	3	5	4	1	4	7	2	1	0	64	91	186	4	3	8	18	4	0	1	3	2	Chr01
Glyma.01G165500.Wm82.a2.v1	0	0	1.03	0	0	0.62	0	0.32	0	0	0	2.2	0	0	0.26	2.07	0	1.57	0	0	1.13	0.67	1.01	0	0	0	1	0	0	1	0	1	0	0	0	1	0	0	1	4	0	4	0	0	1	1	3	0	Chr01
Glyma.01G165600.Wm82.a2.v1	0	0	0.67	0	0.57	0	5.86	1.9	1.57	0	0.49	1.43	0	0.55	1.53	4.05	1.37	1.54	3.66	4.75	5.17	1.32	1.76	3.35	0	0	1	0	1	0	17	9	5	0	1	1	0	2	9	12	4	6	20	18	7	3	8	4	Chr01
Glyma.01G165900.Wm82.a2.v1	0	0	0	3.49	3.24	1.79	0.65	1.2	0.79	0.32	0.31	0	1.87	0.7	0.43	2.34	3.46	1.94	0.58	0.5	0.47	0.55	0.42	0.53	0	0	0	9	9	7	3	9	4	1	1	0	5	4	4	11	16	12	5	3	1	2	3	1	Chr01
Glyma.01G166000.Wm82.a2.v1	1.61	0	0.82	11.27	3.49	0.5	0.84	0.52	0.38	0.62	0	0	2.89	2.02	0.83	0.82	1.26	1.25	1.56	0.65	0.9	0	0	0	3	0	1	15	5	1	2	2	1	1	0	0	4	6	4	2	3	4	7	2	1	0	0	0	Chr01
Glyma.01G166100.Wm82.a2.v1	1.14	0.66	1.74	0.4	0.37	0.53	0.22	0.41	0.41	0.33	0	0	0.77	1.25	1.1	0.44	1.11	1	0.47	0.51	0.96	0	0.43	1.09	4	3	4	1	1	2	1	3	2	1	0	0	2	7	10	2	5	6	4	3	2	0	3	2	Chr01
Glyma.01G166300.Wm82.a2.v1	1.08	4.55	0	1.51	6.31	2.5	0.85	0.78	0.39	0	0	0	0.73	2.37	0.63	5.8	9.27	3.46	1.12	0.97	3.63	0	1.08	0	2	11	0	2	9	5	2	3	1	0	0	0	1	7	3	14	22	11	5	3	4	0	4	0	Chr01
Glyma.01G166400.Wm82.a2.v1	1.19	0.59	2.62	1.41	1.54	1.64	1.63	2.2	1.53	1.58	0.53	0.77	0.96	1.12	1.08	2.87	1.25	2.18	1.9	1.53	1.49	1.13	1.39	0.79	20	13	29	17	20	30	35	77	36	23	8	4	12	30	47	63	27	63	77	43	15	19	47	7	Chr01
Glyma.01G166500.Wm82.a2.v1	0	0	0	8.08	3.75	6.67	10.19	4.51	9.81	0.83	0	0	0	0	0	4.43	4.51	11.77	13.51	9.54	4.85	0	0.36	0	0	0	0	8	4	10	18	13	19	1	0	0	0	0	0	8	8	28	45	22	4	0	1	0	Chr01
Glyma.01G166600.Wm82.a2.v1	2.55	2.19	1.45	1.78	1.65	1.47	1.25	1.99	0.23	0.74	1.06	1.04	2.57	3.39	2.21	1.46	3.48	2.04	3.31	1.91	3.21	0	0.79	1.21	8	9	3	4	4	5	5	13	1	2	3	1	6	17	18	6	14	11	25	10	6	0	5	2	Chr01
Glyma.01G166700.Wm82.a2.v1	18.31	8.56	15.47	16.35	17.83	9.86	12.35	11.49	8	7.05	9.05	6.63	14.38	16.9	13.96	12.48	13.09	10.65	10.78	8.85	4.27	2.54	10.15	2.9	36	22	20	23	27	21	31	47	22	12	16	4	21	53	71	32	33	36	51	29	5	5	40	3	Chr01
Glyma.01G166800.Wm82.a2.v1	0	0	0	2.78	0	0	0	0	0	0	0	0	0	0	0	0	0	0	0	0	0	0	0	0	0	0	0	3	0	0	0	0	0	0	0	0	0	0	0	0	0	0	0	0	0	0	0	0	Chr01
Glyma.01G166900.Wm82.a2.v1	1.27	0.49	0	0	0	0	0	0	0	0	0	0	0	0	2.21	0	0	0	0	0	0	0	0	0	2	1	0	0	0	0	0	0	0	0	0	0	0	0	9	0	0	0	0	0	0	0	0	0	Chr01
Glyma.01G167000.Wm82.a2.v1	0.69	0	0	0	0	0	0.54	1.66	0	0	1.53	0	0	0	0.8	0	0	0	0	0	0	0	0	0	1	0	0	0	0	0	1	5	0	0	2	0	0	0	3	0	0	0	0	0	0	0	0	0	Chr01
Glyma.01G167200.Wm82.a2.v1	0.25	0.38	0.37	0.69	0.32	2.26	0.58	0.59	0	0	0	0	0.33	0.62	0.19	0.75	0.96	1	0.31	0.44	0	0	0.12	0	1	2	1	2	1	10	3	5	0	0	0	0	1	4	2	4	5	7	3	3	0	0	1	0	Chr01
Glyma.01G167300.Wm82.a2.v1	105.02	131.86	89.88	142.42	199.2	204.99	126.15	165.37	126.74	75.57	101.42	43.02	110.9	122.63	87.75	125.88	158.43	170.51	125.76	119.62	105.59	75.45	91.32	60.99	167	274	94	162	244	353	256	547	282	104	145	21	131	311	361	261	323	466	481	317	100	120	291	51	Chr01
Glyma.01G167400.Wm82.a2.v1	0	0	0	0	0	0	0	0.81	0	0	0	0	0	0	0	0	0	0	0	0	0	0	0	0	0	0	0	0	0	0	0	3	0	0	0	0	0	0	0	0	0	0	0	0	0	0	0	0	Chr01
Glyma.01G167500.Wm82.a2.v1	87.86	99.71	31.12	65.6	68.7	57.63	49.68	42.72	29.61	15	16.1	11.38	97.45	92.66	93.97	57.82	61.14	45.31	32.59	31.75	46.94	9.48	10.71	13.29	176	261	41	94	106	125	127	178	83	26	29	7	145	296	487	151	157	156	157	106	56	19	43	14	Chr01
Glyma.01G167600.Wm82.a2.v1	5.98	9.15	4.55	5.97	6.65	6.31	9.04	6.16	3.36	2.96	4.75	4.17	5.18	5.36	4.95	9.5	5.33	4.23	3.73	5.38	3.59	2.56	4.69	4.87	14	28	7	10	12	16	27	30	11	6	10	3	9	20	30	29	16	17	21	21	5	6	22	6	Chr01
Glyma.01G167700.Wm82.a2.v1	56.02	53.69	73.67	255.42	156.6	121.65	64.07	86.87	38.24	108.48	108.91	57.55	57.75	52.85	57.36	68.52	103.54	60.2	36.72	42.4	44.07	95.88	74.05	55.67	111	139	96	362	239	261	162	358	106	186	194	35	85	167	294	177	263	205	175	140	52	190	294	58	Chr01
Glyma.01G167900.Wm82.a2.v1	0	0	0	0	0	0.38	0	0.2	0	0	0	0	0.56	0.26	0.16	0	0.32	0.24	0	0	0	0	0	0	0	0	0	0	0	1	0	1	0	0	0	0	1	1	1	0	1	1	0	0	0	0	0	0	Chr01
Glyma.01G168000.Wm82.a2.v1	132.22	148.83	63.82	56.72	50.86	47.16	46.05	53.48	47.5	38	42.02	20.51	180.82	157.92	170.36	52.05	48.56	53.73	45.96	46.18	44.64	33.57	36.66	21.29	189	278	60	58	56	73	84	159	95	47	54	9	192	360	630	97	89	132	158	110	38	48	105	16	Chr01
Glyma.01G168200.Wm82.a2.v1	11.1	10.39	2.33	1.07	1.74	3.89	0.75	3.31	1.5	1.11	0.85	0	15.71	14.87	12.2	3.23	1.79	3.12	2.55	1.72	0.64	0.38	1.05	0.73	58	71	8	4	7	22	5	36	11	5	4	0	61	124	165	22	12	28	32	15	2	2	11	2	Chr01
Glyma.01G168300.Wm82.a2.v1	2	1.02	1.01	0.93	4.33	0.62	0	0.96	0.48	0.77	0.74	0	0	0	0.77	4.09	5.2	3.11	2.22	1.6	0	0.67	2	0	3	2	1	1	5	1	0	3	1	1	1	0	0	0	3	8	10	8	8	4	0	1	6	0	Chr01
Glyma.01G168400.Wm82.a2.v1	15.3	27.52	6.98	1.07	0.99	4.95	3.6	11.4	4.92	3.54	4.26	14.96	3.09	14.39	13.9	9.98	4.78	24.49	36.27	38.57	12.85	21.42	13.75	11.64	20	47	6	1	1	7	6	31	9	4	5	6	3	30	47	17	8	55	114	84	10	28	36	8	Chr01
Glyma.01G168500.Wm82.a2.v1	2.76	1.21	0	12.12	9.2	6.91	0.62	8.52	1.13	2.73	0.44	1.28	2.12	0.49	1.83	4.83	7.07	7.11	3.11	2.6	0	1.58	0	0.75	7	4	0	22	18	19	2	45	4	6	1	1	4	2	12	16	23	31	19	11	0	4	0	1	Chr01
Glyma.01G168600.Wm82.a2.v1	5.66	6.5	7.38	9.61	13.13	10.83	9.51	11.09	8.38	9.82	12.15	11.86	4.36	5.83	7.66	8.07	8.84	10.59	12.45	13.84	11.55	12.13	7.87	15.39	14	21	12	17	25	29	30	57	29	21	27	9	8	23	49	26	28	45	74	57	17	30	39	20	Chr01
Glyma.01G168900.Wm82.a2.v1	1.4	0.84	1.42	3.49	2.03	1.59	1.35	2.25	1.23	0.54	1.39	1.02	1.68	2.94	2.47	2.63	2.19	2.09	1.43	1.59	1.57	1.72	0.78	0.89	9	7	6	16	10	11	11	30	11	3	8	2	8	30	41	22	18	23	22	17	6	11	10	3	Chr01
Glyma.01G169000.Wm82.a2.v1	1.64	1.05	2.08	1.53	3.9	1.01	0	2.23	0.98	1.58	0.3	0	3.68	4.62	3.17	3.77	2.77	3.34	2.73	2.29	1.83	1.09	1.36	2.08	6	5	5	4	11	4	0	17	5	5	1	0	10	27	30	18	13	21	24	14	4	4	10	4	Chr01
Glyma.01G169100.Wm82.a2.v1	1.14	0.66	1.31	0.8	1.11	0.26	0.45	0.69	0.41	0	0.96	0	2.7	1.79	1.22	0.66	1.12	0.67	1.07	0.69	0.48	1.14	1.14	0	4	3	3	2	3	1	2	5	2	0	3	0	7	10	11	3	5	4	9	4	1	4	8	0	Chr01
Glyma.01G169200.Wm82.a2.v1	0	0.28	6.7	0	0	0	0	0	0	0	0	0	0.49	0.69	0.14	0	0.29	0	0	0	0	0	0	0	0	1	12	0	0	0	0	0	0	0	0	0	1	3	1	0	1	0	0	0	0	0	0	0	Chr01
Glyma.01G169400.Wm82.a2.v1	1.45	1.48	3.67	12.13	10.02	6.23	3.4	11.82	2.07	2.23	4.29	7.85	3.25	4.54	1.86	2.96	3.38	7.57	5.41	4.92	2.43	1.93	2.41	1.83	3	4	5	18	16	14	9	51	6	4	8	5	5	15	10	8	9	27	27	17	3	4	10	2	Chr01
Glyma.01G169500.Wm82.a2.v1	1.88	2.59	2.86	3.16	2.93	13.21	1.77	4.53	2.69	0.87	0	0	1.52	1.65	2.33	10.69	17.03	8.33	6.58	3.16	3.16	0.38	2.44	0.72	5	9	5	6	6	38	6	25	10	2	0	0	3	7	16	37	58	38	42	14	5	1	13	1	Chr01
Glyma.01G169600.Wm82.a2.v1	10.48	5.49	0	13.87	11.45	12.22	2.59	9.01	4.33	1.27	2.45	1.8	8.16	15.9	9.8	15.22	19.78	18.93	12.84	8.27	0	3.86	5.5	5.24	19	13	0	18	16	24	6	34	11	2	4	1	11	46	46	36	46	59	56	25	0	7	20	5	Chr01
Glyma.01G169700.Wm82.a2.v1	44.35	37.22	22.84	35	39.93	66.05	27.47	49.17	28.12	18.18	22.28	16.31	39.48	50.68	37.32	37.85	50.21	44.53	29.44	20.17	38.43	17.16	17.85	27.2	62	68	21	35	43	100	49	143	55	22	28	7	41	113	135	69	90	107	99	47	32	24	50	20	Chr01
Glyma.01G169800.Wm82.a2.v1	3.32	3.05	0.51	6.5	3.02	3.99	5.47	2.88	4.75	4.22	7.39	4.33	2.68	3.13	3.21	3.06	2.85	3.87	5.8	4.79	4.46	5.98	3.32	6.95	10	12	1	14	7	13	21	18	20	11	20	4	6	15	25	12	11	20	42	24	8	18	20	11	Chr01
Glyma.01G169900.Wm82.a2.v1	4.47	4.28	4.68	5.47	5.08	6.45	1.75	3.36	3.4	2.26	1.55	1.82	3.01	3.68	3.13	4.72	4.8	3.9	3.02	3.02	2.35	0.28	0.28	1.06	16	20	11	14	14	25	8	25	17	7	5	2	8	21	29	22	22	24	26	18	5	1	2	2	Chr01
Glyma.01G170000.Wm82.a2.v1	2.97	0.85	0	9.33	12.52	8.56	0.58	6.24	1.33	0	0	0	0.5	0.23	0.43	7.68	6.94	2.8	1.54	0.67	2.49	0	0.19	0	8	3	0	18	26	25	2	35	5	0	0	0	1	1	3	27	24	13	10	3	4	0	1	0	Chr01
Glyma.01G170100.Wm82.a2.v1	5.38	5.14	7.49	2.51	4.65	5.38	4.21	5.17	4.8	3.11	1.99	0	4.22	1.97	2.94	5.5	3.49	5.47	5.22	2.69	2.26	2.69	3.13	3.41	12	15	11	4	8	13	12	24	15	6	4	0	7	7	17	16	10	21	28	10	3	6	14	4	Chr01
Glyma.01G170200.Wm82.a2.v1	25.12	33.39	7.71	12.32	20.31	15.47	11.74	13.56	12.44	7.64	7.11	15.08	45.39	35.38	28.03	23.49	29.05	19.88	14.39	9.79	13.69	10.8	9.24	10.48	114	198	23	40	71	76	68	128	79	30	29	21	153	256	329	139	169	155	157	74	37	49	84	25	Chr01
Glyma.01G170300.Wm82.a2.v1	73.47	65.92	161.79	54.31	33.99	8.58	3.31	9.74	1.81	0.98	3.76	5.5	77.3	119.14	134.48	7.12	25.69	9.34	3.16	1.52	2.84	2.53	4.21	9.64	87	102	126	46	31	11	5	24	3	1	4	2	68	225	412	11	39	19	9	3	2	3	10	6	Chr01
Glyma.01G170400.Wm82.a2.v1	12.69	13.76	6.43	8.87	9.61	10.74	9.53	13.47	8.69	4.89	5.29	6.89	11.39	11.6	10.42	15	11.55	10.15	6.59	7.93	8.88	6.87	7.12	6.03	24	34	8	12	14	22	23	53	23	8	9	4	16	35	51	37	28	33	30	25	10	13	27	6	Chr01
Glyma.01G170600.Wm82.a2.v1	16.76	18.2	18.91	28.34	23.16	15.23	12.92	18.97	12.75	5.62	9.02	11.45	16.74	14.58	11.07	20.94	20.66	19.66	12.81	10.87	13.62	12.43	12.81	8.22	62	88	46	75	66	61	61	146	66	18	30	13	46	86	106	101	98	125	114	67	30	46	95	16	Chr01
Glyma.01G170700.Wm82.a2.v1	0	0.22	0.45	0.41	0	0.54	0.23	0	0.21	0	0	0.95	0	0.55	0.23	0.45	0.69	0.85	0	0	0	0	0	0	0	1	1	1	0	2	1	0	1	0	0	1	0	3	2	2	3	5	0	0	0	0	0	0	Chr01
Glyma.01G170900.Wm82.a2.v1	33.05	23.57	22.84	39.9	36.08	45.09	31.2	35.03	27.92	15.62	16.71	14.68	20.22	33.44	21.19	33.41	36.33	45.02	27.17	28.4	26.49	14.27	16.49	17.14	44	41	20	38	37	65	53	97	52	18	20	6	20	71	73	58	62	103	87	63	21	19	44	12	Chr01
Glyma.01G171000.Wm82.a2.v1	1.03	0	0.31	0.29	0	0.57	0	0.7	0.3	0.48	0.23	0.67	0.28	0.52	0.24	0.48	0.32	0.96	0.34	0.62	0.35	0.21	0.21	0	5	0	1	1	0	3	0	7	2	2	1	1	1	4	3	3	2	8	4	5	1	1	2	0	Chr01
Glyma.01G171100.Wm82.a2.v1	246.09	72.69	17.47	7.41	1.72	2.04	0	3.61	0	0	0	0	249.8	283.96	341.55	5.08	6.55	4.37	0.73	1.59	0.74	0	0.44	0	557	215	26	12	3	5	0	17	0	0	0	0	420	1025	2000	15	19	17	4	6	1	0	2	0	Chr01
Glyma.01G171200.Wm82.a2.v1	0.7	0.53	1.06	0.49	0	0.32	0	0.34	0	0	0	0	0.47	0.66	0.68	0	0	0.2	0	0	0	0	0	0	2	2	2	1	0	1	0	2	0	0	0	0	1	3	5	0	0	1	0	0	0	0	0	0	Chr01
Glyma.01G171300.Wm82.a2.v1	1.72	1.32	0	0	1.67	0	0.34	1.24	0	0.5	0.48	0	0.58	0.81	1.33	0.33	0	1	0.71	0.26	2.17	0.43	0.21	1.64	4	4	0	0	3	0	1	6	0	1	1	0	1	3	8	1	0	4	4	1	3	1	1	2	Chr01
Glyma.01G171400.Wm82.a2.v1	15.94	14.09	4.85	7.43	6.44	5.23	4.72	5.96	3.54	2.86	3.94	3.46	13.83	12.44	14.1	6.25	5.25	2.89	2.95	1.91	5.35	1.77	2.12	2.02	45	52	9	15	14	16	17	35	14	7	10	3	29	56	103	23	19	14	20	9	9	5	12	3	Chr01
Glyma.01G171700.Wm82.a2.v1	0	0	0	1.98	2.76	7.21	2.78	4.78	4.06	0.82	0.79	0	0	0	0	6.53	2.77	5.78	1.48	3.41	1.19	0	2.48	2.7	0	0	0	2	3	11	5	14	8	1	1	0	0	0	0	12	5	14	5	8	1	0	7	2	Chr01
Glyma.01G171800.Wm82.a2.v1	2.43	0.37	0.74	3.4	2.53	3.15	0.38	3.51	1.04	1.69	1.08	3.17	0.66	2.75	2.82	4.11	3.04	2.83	2.02	2.34	1.63	2.43	1.7	0.93	5	1	1	5	4	7	1	15	3	3	2	2	1	9	15	11	8	10	10	8	2	5	7	1	Chr01
Glyma.01G171900.Wm82.a2.v1	13.25	13.98	9.8	18.53	7.9	4.96	0.56	12.05	1.02	0	0	0	11.09	19.31	16.75	9.34	13.69	8.75	2.53	1.5	0	0	0.18	0.68	37	51	18	37	17	15	2	70	4	0	0	0	23	86	121	34	49	42	17	7	0	0	1	1	Chr01
Glyma.01G172000.Wm82.a2.v1	1.31	1.25	0.5	1.38	2.55	0	0.26	1.58	0.23	0.38	0	0	0.88	1.23	0.38	0.25	0	0.57	0	0.98	0.55	0	0.16	0	4	5	1	3	6	0	1	10	1	1	0	0	2	6	3	1	0	3	0	5	1	0	1	0	Chr01
Glyma.01G172200.Wm82.a2.v1	3.19	3.08	3.17	1.36	1.8	3.46	3.81	3.6	3.17	1.76	1.39	3.17	2.8	2.79	3.27	3.83	2.49	3.72	4.04	3.25	4.43	2.22	2.36	1.85	23	29	15	7	10	27	35	54	32	11	9	7	15	32	61	36	23	46	70	39	19	16	34	7	Chr01
Glyma.01G172300.Wm82.a2.v1	54.76	55.05	24.49	36.02	51.57	37.18	18.09	28.65	22.25	13.65	11.94	15.74	52.03	44.1	51.46	35.41	40.62	37.48	29.02	24.8	25.24	8.59	20.63	20.42	102	134	30	48	74	75	43	111	58	22	20	9	72	131	248	86	97	120	130	77	28	16	77	20	Chr01
Glyma.01G172400.Wm82.a2.v1	45.51	46.58	62.28	46.92	64.25	36.25	19.17	32	24.39	12.49	6.96	12.97	57.44	38.17	44.2	57.59	58.13	33.43	22.23	16.73	28.66	10.24	18.45	8.65	80	107	72	59	87	69	43	117	60	19	11	7	75	107	201	132	131	101	94	49	30	18	65	8	Chr01
Glyma.01G172500.Wm82.a2.v1	0	0	0	0	0	0.27	0	0.43	0	0	0.33	0	0	0	0	0	0	0.17	0.25	0	0	0	0	0	0	0	0	0	0	1	0	3	0	0	1	0	0	0	0	0	0	1	2	0	0	0	0	0	Chr01
Glyma.01G172600.Wm82.a2.v1	3.07	5.71	0.67	4.91	1.14	0.81	0	2.53	0.31	0.51	0.49	0	2.96	2.2	2.21	0	0.69	0.26	0	0	0	0.44	0	0	7	17	1	8	2	2	0	12	1	1	1	0	5	8	13	0	2	1	0	0	0	1	0	0	Chr01
Glyma.01G172700.Wm82.a2.v1	0	0	0.79	0	0	0	0	0	0	0	0	0	0	0	0	0	0	0	0	0	0	0	0	0	0	0	1	0	0	0	0	0	0	0	0	0	0	0	0	0	0	0	0	0	0	0	0	0	Chr01
Glyma.01G172800.Wm82.a2.v1	2.46	0.47	0	25.8	25.55	31.24	51.58	47.61	54.52	19.9	18.47	6.01	0.83	0.77	0.71	51.43	50.86	78.03	84.66	128.46	102.25	38.13	60.17	71.36	4	1	0	30	32	55	107	161	124	28	27	3	1	2	3	109	106	218	331	348	99	62	196	61	Chr01
Glyma.01G172900.Wm82.a2.v1	1.47	2.63	2.99	0.69	1.91	2.27	0.77	2.13	0	0	0.55	0	3.97	1.23	3.04	4.15	2.3	8.58	4.7	1.77	4.13	0	0	0	3	7	4	1	3	5	2	9	0	0	1	0	6	4	16	11	6	30	23	6	5	0	0	0	Chr01
Glyma.01G173000.Wm82.a2.v1	1.26	4.58	2.39	4.84	7.36	3.2	3.7	5.3	4.05	1.09	1.75	3.08	5.09	5.53	5.23	7.73	4.67	6.23	14.8	8.32	7.93	3.46	3.93	3.59	4	19	5	11	18	11	15	35	18	3	5	3	12	28	43	32	19	34	113	44	15	11	25	6	Chr01
Glyma.01G173100.Wm82.a2.v1	0	0.47	0	0	0	0	0	0	0	0	0	0	0	0.39	0.24	0.95	0	0	0	0	0	0	0	0	0	1	0	0	0	0	0	0	0	0	0	0	0	1	1	2	0	0	0	0	0	0	0	0	Chr01
Glyma.01G173300.Wm82.a2.v1	25.98	34.88	15.94	15.93	10.06	30.73	13.22	27.39	15.64	9.48	8.62	11.88	22.09	20.86	22.9	29.02	29.15	28.64	28.05	22.16	15.31	13.22	13.88	15.6	57	100	23	25	17	73	37	125	48	18	17	8	36	73	130	83	82	108	148	81	20	29	61	18	Chr01
Glyma.01G173400.Wm82.a2.v1	2.55	1.22	1.94	7.13	2.9	2.94	3	3.22	1.59	4.05	2.84	2.08	2.57	1.2	2.83	1.96	2.49	4.45	4.64	3.25	3.75	6.06	3.18	2.43	8	5	4	16	7	10	12	21	7	11	8	2	6	6	23	8	10	24	35	17	7	19	20	4	Chr01
Glyma.01G173500.Wm82.a2.v1	0	0	0	0	0.43	0	0	0.16	0	0	0	0	0	0.62	0	0	0.51	0.58	0	0.2	0	0	0	0.63	0	0	0	0	1	0	0	1	0	0	0	0	0	3	0	0	2	3	0	1	0	0	0	1	Chr01
Glyma.01G173600.Wm82.a2.v1	2.01	1.28	1.02	0.47	0.87	0.31	1.05	1.77	2.88	1.94	2.98	1.09	2.26	1.89	1.94	0.77	0.78	0.59	1.95	1.81	1.69	2.01	1	1.28	6	5	2	1	2	1	4	11	12	5	8	1	5	9	15	3	3	3	14	9	3	6	6	2	Chr01
Glyma.01G173700.Wm82.a2.v1	11.19	10.12	7.73	13.75	6.6	9.39	6.11	11.9	4.12	5.88	3.02	2.21	7.3	9.57	8.52	8.84	10.58	6.91	9.31	3.46	9.11	6.1	3.89	3.22	33	39	15	29	15	30	23	73	17	15	8	2	16	45	65	34	40	35	66	17	16	18	23	5	Chr01
Glyma.01G174000.Wm82.a2.v1	4.11	2.94	2.92	3.06	3.91	3.8	2.79	3.43	2.74	0.63	0.3	0	2.21	5.5	2.86	3.15	6.41	4.15	2.16	2.47	2.76	0.82	1.09	1.04	15	14	7	8	11	15	13	26	14	2	1	0	6	32	27	15	30	26	19	15	6	3	8	2	Chr01
Glyma.01G174200.Wm82.a2.v1	0	0.48	0	0.44	0.82	0.29	0	0.3	0	0	0.7	0	0	0.79	0.49	0.48	0.74	1.1	0.13	0.75	0	0	0.47	0	0	2	0	1	2	1	0	2	0	0	2	0	0	4	4	2	3	6	1	4	0	0	3	0	Chr01
Glyma.01G174300.Wm82.a2.v1	0	0	0	0	0	0	0	0	0	0	0	0	0	0	0.36	0.72	0	0	0	0	0	0	0	0	0	0	0	0	0	0	0	0	0	0	0	0	0	0	1	1	0	0	0	0	0	0	0	0	Chr01
Glyma.01G174700.Wm82.a2.v1	26.26	31.33	23.49	31.32	30.09	31.39	19.37	28.97	20.43	16.96	22.34	20.13	33.28	38.75	33.44	17.18	19.88	21.57	21.2	18.54	23.35	10.81	16.96	22.04	34	53	20	29	30	44	32	78	37	19	26	8	32	80	112	29	33	48	66	40	18	14	44	15	Chr01
Glyma.01G174900.Wm82.a2.v1	9.81	15.01	22.07	28.51	16.8	17.02	21.52	22.63	23.55	14.5	13.96	14.06	13.73	12.05	10.01	23.16	24.17	18.71	20.71	16.71	21.07	16.08	15.66	11.93	25	50	37	52	33	47	70	120	84	32	32	11	26	49	66	77	79	82	127	71	32	41	80	16	Chr01
Glyma.01G175000.Wm82.a2.v1	1.69	1.08	1.28	0.79	0	0.26	0	0.27	0	0	0.31	0	0.76	0.53	1.41	0	0.22	0.16	0.12	0	0	0	0	0.53	6	5	3	2	0	1	0	2	0	0	1	0	2	3	13	0	1	1	1	0	0	0	0	1	Chr01
Glyma.01G175100.Wm82.a2.v1	25.91	23.58	35.14	40.14	43.18	38.15	35.12	32.15	37.28	18.61	21.81	21.67	22.15	20.2	20.84	37.6	34.68	29.95	26.64	27.1	37.62	19.25	21.84	23.97	74	88	66	82	95	118	128	191	149	46	56	19	47	92	154	140	127	147	183	129	64	55	125	36	Chr01
Glyma.01G175200.Wm82.a2.v1	9.16	9.26	3.98	0	0.42	3.93	1.28	5.98	3.74	2.65	1.09	3.2	5.29	8.21	6.96	12.55	4.85	8.57	17.68	14.72	12.64	4.58	4.57	2.49	28	37	8	0	1	13	5	38	16	7	3	3	12	40	55	50	19	45	130	75	23	14	28	4	Chr01
Glyma.01G175300.Wm82.a2.v1	2.65	5.27	0	6.67	8.95	2.45	0	3.19	1.52	0.31	0.29	0	2.14	1.99	1.13	4.07	2.69	3.24	1.54	0.8	0.44	0	0.26	0	10	26	0	18	26	10	0	25	8	1	1	0	6	12	11	20	13	21	14	5	1	0	2	0	Chr01
Glyma.01G175400.Wm82.a2.v1	7.13	1.82	4.82	4.43	3.09	6.59	1.86	3.81	3.4	4.58	5.29	5.16	2.13	5.96	3.68	4.25	6.18	2.77	1.32	5.71	2.66	1.58	2.77	3.01	9	3	4	4	3	9	3	10	6	5	6	2	2	12	12	7	10	6	4	12	2	2	7	2	Chr01
Glyma.01G175500.Wm82.a2.v1	0.62	0.95	3.79	0.87	0	0	0	0.15	0	0	0.35	0	0	1.17	0.6	0	0.24	0.18	0.39	0	0	0	0	0	2	4	8	2	0	0	0	1	0	0	1	0	0	6	5	0	1	1	3	0	0	0	0	0	Chr01
Glyma.01G175600.Wm82.a2.v1	30.37	27.26	13.76	15.11	21.61	21.03	14.42	24.15	11.06	11.81	11.69	4.76	26.34	30.76	31.83	20.83	18.68	19.54	17	18.22	12.26	6.13	8.31	7.22	104	122	31	37	57	78	63	172	53	35	36	5	67	168	282	93	82	115	140	104	25	21	57	13	Chr01
Glyma.01G175700.Wm82.a2.v1	122.94	117.93	173.12	132.14	129.88	104.41	92.94	115.08	93.5	56.1	56.41	53.36	108.11	112.72	123.71	80.52	84.35	94.03	79.83	78.74	69.25	42.22	57.02	60.04	623	781	577	479	507	573	601	1213	663	246	257	83	407	911	1622	532	548	819	973	665	209	214	579	160	Chr01
Glyma.01G175800.Wm82.a2.v1	1.08	0	0.82	0	0	1	0.84	0.26	0	0.62	0	0	0.73	0.34	0.62	0.41	0	0.63	0.9	0.32	0.9	0	0	1.02	2	0	1	0	0	2	2	1	0	1	0	0	1	1	3	1	0	2	4	1	1	0	0	1	Chr01
Glyma.01G175900.Wm82.a2.v1	38.69	34.99	35.65	36.87	57.83	34.1	27.1	37.76	22.62	31.84	15	11.46	40.24	32.34	33.98	34.17	41.61	28.99	27.54	22.86	31.49	16.41	21.94	32.33	66	78	40	45	76	63	59	134	54	47	23	6	51	88	150	76	91	85	113	65	32	28	75	29	Chr01
Glyma.01G176000.Wm82.a2.v1	2.14	1.64	0	1.2	0.56	0.99	0.34	1.85	0.61	0.25	1.19	0	0	1.61	2.24	1.31	0.5	1.37	1.42	0.9	0.72	1.07	0.96	2.04	10	10	0	4	2	5	2	18	4	1	5	0	0	12	27	8	3	11	16	7	2	5	9	5	Chr01
Glyma.01G176100.Wm82.a2.v1	0	0	0	0	0	0	0	0.67	0.99	0	0	0	0	0	0	1.06	0	0.81	0	0	0	0	0.69	0	0	0	0	0	0	0	0	1	1	0	0	0	0	0	0	1	0	1	0	0	0	0	1	0	Chr01
Glyma.01G176200.Wm82.a2.v1	5.29	3.47	4.6	6.34	7.85	7.68	20.73	10.9	11.34	2.62	9.25	7.39	1.02	1.42	2.34	9.85	2.95	11.43	8.8	2.72	2.54	3.02	6.79	4.31	7	6	4	6	8	11	35	30	21	3	11	3	1	3	8	17	5	26	28	6	2	4	18	3	Chr01
Glyma.01G176300.Wm82.a2.v1	6.31	9.66	1.92	2.65	5.73	11.65	5.93	9.1	5.41	2.19	2.11	2.06	10.19	7.91	8.29	11.62	11.32	9.55	7.87	5.68	3.18	1.26	4.41	6	10	20	2	3	7	20	12	30	12	3	3	1	12	20	34	24	23	26	30	15	3	2	14	5	Chr01
Glyma.01G176400.Wm82.a2.v1	2.78	1.98	5.07	3.37	3.13	2.57	1.89	0.8	2.25	1.28	0.82	0.6	0.75	2.09	1.15	2.13	2.31	3.02	1.46	2	2.18	1.48	0.74	0.35	15	14	18	13	13	15	13	9	17	6	4	1	3	18	16	15	16	28	19	18	7	8	8	1	Chr01
Glyma.01G176600.Wm82.a2.v1	5.17	5.65	7.48	4.47	4.15	4.09	1.54	1.66	0.88	0.28	0.27	0.8	2.65	4.94	3.71	1.7	3.07	2.29	1.64	2.07	0.83	0.49	0.61	0.47	21	30	20	13	13	18	8	14	5	1	1	1	8	32	39	9	16	16	16	14	2	2	5	1	Chr01
Glyma.01G176700.Wm82.a2.v1	0.41	0.63	0.62	1.43	0.8	0.94	0.64	1.48	0	0.24	0.23	0	0.55	0.9	1.19	1.88	0.48	0.6	1.19	0.37	0.34	0.41	0.71	0.78	2	4	2	5	3	5	4	15	0	1	1	0	2	7	15	12	3	5	14	3	1	2	7	2	Chr01
Glyma.01G176800.Wm82.a2.v1	28.11	29.33	17.49	21.44	27.09	25.96	27.37	33.79	16.13	23.13	19.9	11.1	13.76	27.24	23.87	15.68	23.59	29.24	20.19	18.4	20.02	15.76	13.18	15.39	66	90	27	36	49	66	82	165	53	47	42	8	24	102	145	48	71	118	114	72	28	37	62	19	Chr01
Glyma.01G176900.Wm82.a2.v1	3.87	6.82	3.53	6.5	6.03	8.23	3.95	5.96	4.71	3.58	2.58	2.52	7.82	5.83	4.49	7.72	4.53	9.24	5.64	4.42	3.25	2.32	4.06	2.21	10	23	6	12	12	23	13	32	17	8	6	2	15	24	30	26	15	41	35	19	5	6	21	3	Chr01
Glyma.01G177000.Wm82.a2.v1	2.16	1.38	3.83	39.21	4.2	19.59	239.5	100.43	258.52	401.37	375.95	353.76	0.48	2.71	2.64	8	5.61	32.22	200.78	274.45	138.86	459.78	433.33	523.77	6	5	7	78	9	59	850	581	1006	966	940	302	1	12	19	29	20	154	1343	1272	230	1279	2415	766	Chr01
Glyma.01G177200.Wm82.a2.v1	4.95	3.51	11.82	0	3.67	1.96	2.22	4.93	0.76	2.04	3.93	1.15	6.66	6.42	8.33	1.35	2.2	4.11	2.06	0.85	1.78	2.12	1.94	1.34	14	13	22	0	8	6	8	29	3	5	10	1	14	29	61	5	8	20	14	4	3	6	11	2	Chr01
Glyma.01G177300.Wm82.a2.v1	14.34	14.1	6.23	11.45	9.75	10.72	3.21	11.49	6.34	6.31	5.32	4.45	13.78	17.12	14.51	11.52	10.65	15.89	14.48	6.55	9.17	3.41	2.38	1.3	21	27	6	12	11	17	6	35	13	8	7	2	15	40	55	22	20	40	51	16	8	5	7	1	Chr01
Glyma.01G177400.Wm82.a2.v1	2.15	2.12	11.69	2.15	1.6	2.84	2.17	4.58	1.54	0.36	0.68	1	1.24	5.01	4.87	0.71	2.4	0.54	0.9	0.74	0	0	0.46	0	7	9	25	5	4	10	9	31	7	1	2	1	3	26	41	3	10	3	7	4	0	0	3	0	Chr01
Glyma.01G177500.Wm82.a2.v1	0	0	13.42	121.3	3.82	0.68	0	2.83	0	0	0	0	0.99	0.46	0.85	0	0	0	2.45	1.32	1.23	0.74	0.73	0	0	0	12	118	4	1	0	8	0	0	0	0	1	1	3	0	0	0	8	3	1	1	2	0	Chr01
Glyma.01G177600.Wm82.a2.v1	9.07	13.88	1.62	18.64	9	11.33	7.52	7.44	6.48	3.08	11.27	3.47	14.36	10.37	13.4	6.54	6.66	9	3.55	3.84	1.79	2.67	2.66	1.01	17	34	2	25	13	23	18	29	17	5	19	2	20	31	65	16	16	29	16	12	2	5	10	1	Chr01
Glyma.01G177700.Wm82.a2.v1	24.54	26.45	60.33	182.14	152.15	119.18	94.57	120.65	90.34	75.87	67.34	99.28	30.01	25.14	22.06	117.65	109.76	95.21	69.56	59.4	90.66	66.46	73.69	62.62	120	169	194	637	573	631	590	1227	618	321	296	149	109	196	279	750	688	800	818	484	264	325	722	161	Chr01
Glyma.01G178000.Wm82.a2.v1	34.19	37.54	36.92	26.32	25.09	34.78	34.95	29.78	30.1	16.03	28.66	27.44	36.69	33.56	30.84	31.92	25.12	24.22	23.07	28.54	27.46	13.38	19.78	20.73	69	99	49	38	39	76	90	125	85	28	52	17	55	108	161	84	65	84	112	96	33	27	80	22	Chr01
Glyma.01G178100.Wm82.a2.v1	4.08	3.65	0.52	2.86	3.98	0.94	1.33	0.65	0.97	0.39	1.51	0	5.96	2.13	3.82	2.35	2.39	1.98	0.99	0.82	1.71	0	0.34	0.65	12	14	1	6	9	3	5	4	4	1	4	0	13	10	29	9	9	10	7	4	3	0	2	1	Chr01
Glyma.01G178200.Wm82.a2.v1	76.56	75.55	58.97	77.45	75.2	72.09	49.34	55.21	50.76	30.85	38.1	49.23	82.04	89.38	97.73	73.01	93.11	70.92	56.12	55.31	59.2	33.74	37.95	43.1	152	196	77	110	115	155	125	228	141	53	68	30	121	283	502	189	237	242	268	183	70	67	151	45	Chr01
Glyma.01G178400.Wm82.a2.v1	0.62	0.94	4.22	1.72	3.6	4.55	0	1.63	2.42	2.85	2.06	1	1.24	2.51	2.5	1.18	2.4	3.59	2.05	2.59	2.07	1.85	2.46	2.93	2	4	9	4	9	16	0	11	11	8	6	1	3	13	21	5	10	20	16	14	4	6	16	5	Chr01
Glyma.01G178500.Wm82.a2.v1	3.72	1.58	2.51	18.5	8.05	3.82	3.89	2.98	1.77	0.96	2.76	5.39	2.78	1.56	3.2	5.71	4.51	3.61	1.89	0.74	3.47	3.31	2.68	1.57	9	5	4	32	15	10	12	15	6	2	6	4	5	6	20	18	14	15	11	3	5	8	13	2	Chr01
Glyma.01G178600.Wm82.a2.v1	17.88	13.69	14.07	25	4.8	21.64	9.67	11.56	4.41	9.26	10.98	6.03	15.77	18.17	19.55	5.68	7.22	10.05	7.95	13.69	9.32	7.4	7.69	8.21	29	29	15	29	6	38	20	39	10	13	16	3	19	47	82	12	15	28	31	37	9	12	25	7	Chr01
Glyma.01G178700.Wm82.a2.v1	4.52	7.86	24.35	0	1.6	1.14	0	1.38	0.59	0.47	0	0	5.53	9.01	9.52	0.31	0.96	1.43	0.34	0.49	0	0	0.2	0	11	25	39	0	3	3	0	7	2	1	0	0	10	35	60	1	3	6	2	2	0	0	1	0	Chr01
Glyma.01G178800.Wm82.a2.v1	0.91	1.63	2.31	3.4	0	1.12	2.86	3.94	2.82	2.46	1.35	0.99	4.5	3.43	1.29	3.03	1.66	3.71	6.56	4.92	4.08	1.52	3.33	1.15	3	7	5	8	0	4	12	27	13	7	4	1	11	18	11	13	7	21	52	27	8	5	22	2	Chr01
Glyma.01G179000.Wm82.a2.v1	1.08	0.41	0	0	0	0	0	0	0	0	0	0	0	0.51	0.1	0	0	0	0	0	0	0	0	0	4	2	0	0	0	0	0	0	0	0	0	0	0	3	1	0	0	0	0	0	0	0	0	0	Chr01
Glyma.01G179100.Wm82.a2.v1	0	0	0	0	0	0	0	0	0	0	0	0	0.55	0.25	0.71	0.94	2.06	2.13	1.35	0.98	0.68	0.41	0.81	0.77	0	0	0	0	0	0	0	0	0	0	0	0	2	2	9	6	13	18	16	8	2	2	8	2	Chr01
Glyma.01G179300.Wm82.a2.v1	4.11	2.65	1.76	3.41	2.67	3.32	2.01	2.72	1.28	1.04	0.71	0.84	3.63	3.46	2.68	3.54	3.81	2.39	3.31	1.93	1.08	0.77	0.77	0.49	32	27	9	19	16	28	20	44	14	7	5	2	21	43	54	36	38	32	62	25	5	6	12	2	Chr01
Glyma.01G179400.Wm82.a2.v1	0.41	0	0	0	0	0	0	0	0	0	0	0	1.67	0.26	0.32	0	0	0	0	0	0	0	0	0	1	0	0	0	0	0	0	0	0	0	0	0	3	1	2	0	0	0	0	0	0	0	0	0	Chr01
Glyma.01G179800.Wm82.a2.v1	3.3	2.06	3.19	3.77	1.56	2.21	3.05	3.03	2.14	2.77	1.33	0.98	2.42	4.14	4.29	1.15	1.64	2.97	2.99	2.52	1.51	3.6	1.05	2.28	11	9	7	9	4	8	13	21	10	8	4	1	6	22	37	5	7	17	24	14	3	12	7	4	Chr01
Glyma.01G179900.Wm82.a2.v1	0	0.17	8.64	1.91	1.77	3.78	9.8	5.79	11.7	12.08	9.86	11.85	0.31	0.71	0.62	6.8	5.5	4.5	6.52	11.73	8.78	10.68	8.62	9.51	0	1	25	6	6	18	55	53	72	46	39	16	1	5	7	39	31	34	69	86	23	47	76	22	Chr01
Glyma.01G180000.Wm82.a2.v1	7.16	5.71	2.27	7.51	3.1	5.23	2.81	4.16	1.71	2.07	0.66	1.94	10.04	7.11	8.99	4.12	3.96	2.6	2.36	1.43	3.01	0.6	1.64	0.57	24	25	5	18	8	19	12	29	8	6	2	2	25	38	78	18	17	15	19	8	6	2	11	1	Chr01
Glyma.01G180100.Wm82.a2.v1	1.07	0.91	0.36	0.99	0.62	1.53	0.56	1.08	0.42	0.41	0.53	0.77	0.48	1.41	0.92	1.64	1.2	1.45	0.64	0.85	0.8	0.83	0.65	0.45	9	10	2	6	4	14	6	19	5	3	4	2	3	19	20	18	13	21	13	12	4	7	11	2	Chr01
Glyma.01G180200.Wm82.a2.v1	2.19	4.67	4.82	1.02	1.9	1.35	1.72	2.35	1.92	1.69	1.63	0.79	2.3	3.36	2.92	0.94	1.14	1.56	1.83	0.59	1.23	1.22	2.43	1.86	9	25	13	3	6	6	9	20	11	6	6	1	7	22	31	5	6	11	18	4	3	5	20	4	Chr01
Glyma.01G180300.Wm82.a2.v1	4.96	1.9	0	38.13	16.09	6.87	6.8	12.52	11.52	2.86	0	0	1.67	3.11	2.4	18.06	11.6	17.31	12.37	8.93	4.16	2.48	1.86	0	4	2	0	22	10	6	7	21	13	2	0	0	1	4	5	19	12	24	24	12	2	2	3	0	Chr01
Glyma.01G180500.Wm82.a2.v1	7.87	1.21	28.73	15.41	11.24	4.36	0.62	9.46	1.13	4.55	2.63	2.57	23.32	18.27	25.57	6.04	5.53	4.12	2.95	0.94	0	1.57	0	0	10	2	24	14	11	6	1	25	2	5	3	1	22	37	84	10	9	9	9	2	0	2	0	0	Chr01
Glyma.01G180700.Wm82.a2.v1	8.44	3.23	24.61	3.93	1.83	0.65	0.55	2.03	0	1.63	0.78	0	10.42	8.38	14.14	2.16	1.1	1.64	2.63	1.27	1.18	4.92	0.35	0	12	6	23	4	2	1	1	6	0	2	1	0	11	19	52	4	2	4	9	3	1	7	1	0	Chr01
Glyma.01G180800.Wm82.a2.v1	254.85	206.77	382.5	46.74	90.36	199.41	159.77	158.89	224.84	162.13	164.6	182.12	281.1	159.46	240.23	239.6	178.26	218.44	200.76	175.29	321.16	160.55	204.31	143.83	465	493	459	61	127	394	372	603	574	256	270	102	381	464	1134	570	417	685	881	533	349	293	747	138	Chr01
Glyma.01G181000.Wm82.a2.v1	12.56	12.24	24.31	15.17	24.47	18.99	33.12	12.36	36.33	23.76	25.41	16.74	10.76	19.7	14.57	12.7	18.71	16.28	16.86	33.24	22.05	9.14	16.53	18.46	22	28	28	19	33	36	74	45	89	36	40	9	14	55	66	29	42	49	71	97	23	16	58	17	Chr01
Glyma.01G181200.Wm82.a2.v1	24.81	22.97	21.29	25.17	27.01	34.36	12.86	21.55	13.44	6.47	7.12	10.43	25.32	23.08	21.65	39.9	39.01	29.1	16.97	17.29	16.12	5.6	11.58	10.65	62	75	35	45	52	93	41	112	47	14	16	8	47	92	140	130	125	125	102	72	24	14	58	14	Chr01
Glyma.01G181500.Wm82.a2.v1	4.49	4.49	1.57	4.34	2.69	4.78	2.43	3.65	1.23	1.2	1.54	1.12	5.11	3.9	4	4.5	5.12	8.23	2.15	5.59	4.06	1.04	2.24	3.28	13	17	3	9	6	15	9	22	5	3	4	1	11	18	30	17	19	41	15	27	7	3	13	5	Chr01
Glyma.01G181700.Wm82.a2.v1	1.03	0.39	0.78	0	1.34	1.43	0	0.99	0.37	0	1.15	0	0.69	0.32	0.2	1.19	0.8	2.1	0.21	0.31	0	0	0.26	0	2	1	1	0	2	3	0	4	1	0	2	0	1	1	1	3	2	7	1	1	0	0	1	0	Chr01
Glyma.01G181800.Wm82.a2.v1	0	0	0	0	0.48	0	0	0	0	0	0	0	0	0	0.14	0	0.58	0	0	0	0	0	0	0	0	0	0	0	1	0	0	0	0	0	0	0	0	0	1	0	2	0	0	0	0	0	0	0	Chr01
Glyma.01G181900.Wm82.a2.v1	0	0	0	0	0	0	0	0.12	0	0	0	0	0	0	0	0	0	0	0	0	0	0	0	0	0	0	0	0	0	0	0	1	0	0	0	0	0	0	0	0	0	0	0	0	0	0	0	0	Chr01
Glyma.01G182000.Wm82.a2.v1	0	0	0	0	0	0	0	0	0	0	0	0	0	0	0.06	0	0	0	0	0.1	0	0	0	0	0	0	0	0	0	0	0	0	0	0	0	0	0	0	1	0	0	0	0	1	0	0	0	0	Chr01
Glyma.01G182200.Wm82.a2.v1	0	1.97	0	3.61	8.37	3.57	172.83	1.24	28.57	80.48	116.2	79.83	0	0	0.5	0	5.03	4.5	0	2.32	2.17	25.79	46.34	4.91	0	2	0	2	5	3	171	2	31	54	81	19	0	0	1	0	5	6	0	3	1	20	72	2	Chr01
Glyma.01G182300.Wm82.a2.v1	4.7	9.26	8.17	14.09	14.83	10.55	10.01	9.69	10.57	6.99	5.23	0	6.33	9.27	7.27	11.85	11.01	14.86	10.9	10.08	7.9	3.36	8.38	0	7	18	8	15	17	17	19	30	22	9	7	0	7	22	28	23	21	38	39	25	7	5	25	0	Chr01
Glyma.01G182400.Wm82.a2.v1	1.35	2.49	1.65	0.76	1.06	0	0	0.39	0.19	0	0.3	0	1.09	1.53	1.57	0.21	0	0.16	0.11	0	0	0.27	0	0	5	12	4	2	3	0	0	3	1	0	1	0	3	9	15	1	0	1	1	0	0	1	0	0	Chr01
Glyma.01G182500.Wm82.a2.v1	32.26	31.74	12.26	19.33	11.22	15.96	5.42	13.29	12.35	2	7.05	5.63	28.69	20.23	25.83	20.76	17.07	12.4	9.58	10.02	8.7	6.33	4.89	4.38	56	72	14	24	15	30	12	48	30	3	11	3	37	56	116	47	38	37	40	29	9	11	17	4	Chr01
Glyma.01G182600.Wm82.a2.v1	25.16	24.2	28.42	9.04	16.8	19.91	30.42	19.01	30.31	21.6	17.59	30.44	19.35	15.77	30.28	30.87	23.55	16.31	10.76	8.63	21.72	5.03	9.68	5.47	35	44	26	9	18	30	54	55	59	26	22	13	20	35	109	56	42	39	36	20	18	7	27	4	Chr01
Glyma.01G182700.Wm82.a2.v1	3.92	3.6	3.58	0	0	0	0	0	0	0	0	0	11.61	3.93	8.18	1.2	0	0.91	0.33	0	0	0.78	0.78	1.49	5	6	3	0	0	0	0	0	0	0	0	0	11	8	27	2	0	2	1	0	0	1	2	1	Chr01
Glyma.01G183000.Wm82.a2.v1	5.65	3.96	6.44	7.9	6.72	3.48	4.8	3.85	3.03	3.26	2.62	1.53	1.9	4.72	6.55	5.05	7.71	4.11	4.11	1.13	3.16	4.71	2.82	6.27	12	11	9	12	11	8	13	17	9	6	5	1	3	16	36	14	21	15	21	4	4	10	12	7	Chr01
Glyma.01G183100.Wm82.a2.v1	61.71	59.66	19.22	29.46	26.18	21.4	31.61	12.59	10.97	1.74	5.02	0.98	81.85	80.59	80.51	23.32	18.55	16.99	12.89	8.67	5.05	0.9	6.91	2.86	205	259	42	70	67	77	134	87	51	5	15	1	202	427	692	101	79	97	103	48	10	3	46	5	Chr01
Glyma.01G183200.Wm82.a2.v1	1.11	0.85	1.68	27.81	0	0	0	0.53	0	0	0	7.2	1.49	0	2.56	0	0	0	0.92	0.66	0	1.1	0.55	2.1	1	1	1	18	0	0	0	1	0	0	0	2	1	0	6	0	0	0	2	1	0	1	1	1	Chr01
Glyma.01G183300.Wm82.a2.v1	1.78	3.69	3.47	1.77	0	1.87	1.39	1.46	1.63	0.29	0	0	6.83	5.57	5.69	1.36	0.79	1.33	1.9	1.37	0.85	0.51	1.01	0.96	7	19	9	5	0	8	7	12	9	1	0	0	20	35	58	7	4	9	18	9	2	2	8	2	Chr01
Glyma.01G183400.Wm82.a2.v1	1.45	2.59	1.83	1.35	2.19	0.89	1.7	2.44	1.55	0.56	1.34	0	3.9	1.97	1.96	1.85	2.26	2.25	1.81	1.01	0.41	0.97	1.2	0.46	6	14	5	4	7	4	9	21	9	2	5	0	12	13	21	10	12	16	18	7	1	4	10	1	Chr01
Glyma.01G183500.Wm82.a2.v1	11.92	13.95	13.33	22.55	23.21	16.19	8.24	12.31	13.28	6.08	10.53	8	17.46	9.67	13.01	15.6	10.67	11.22	9.33	7.36	2.35	8.06	8.05	8	34	52	25	46	51	50	30	73	53	15	27	7	37	44	96	58	39	55	64	35	4	23	46	12	Chr01
Glyma.01G183600.Wm82.a2.v1	7.39	2.68	6.51	9.79	8.59	8.26	8.23	9.54	4.45	5.85	9.09	10.14	5.24	7.32	5.26	4.78	8.19	7.92	5.66	10.51	4.57	3.89	3.11	4.44	19	9	11	18	17	23	27	51	16	13	21	8	10	30	35	16	27	35	35	45	7	10	16	6	Chr01
Glyma.01G183700.Wm82.a2.v1	1.4	1.07	2.13	5.88	3.64	3.89	1.47	5.4	1.34	1.62	2.6	1.52	3.15	1.76	2.17	1.79	5.47	7.35	2.33	1.12	0.79	2.34	1.4	4.45	3	3	3	9	6	9	4	24	4	3	5	1	5	6	12	5	15	27	12	4	1	5	6	5	Chr01
Glyma.01G183800.Wm82.a2.v1	1.58	2.9	0.96	3.09	5.32	4.66	2.97	5.01	1.8	4.38	3.16	1.03	1.27	2.97	2.07	4.84	4.68	6.79	3.02	5.68	3.18	1.58	2.36	3.6	5	12	2	7	13	16	12	33	8	12	9	1	3	15	17	20	19	37	23	30	6	5	15	6	Chr01
Glyma.01G183900.Wm82.a2.v1	0.29	0.45	0	0.82	0	0.54	0.69	0.57	0.84	0.68	0.66	0	0.79	0.18	0.34	0.68	0.23	0.86	1.1	0.35	0.49	0.29	0.59	0	1	2	0	2	0	2	3	4	4	2	2	0	2	1	3	3	1	5	9	2	1	1	4	0	Chr01
Glyma.01G184100.Wm82.a2.v1	4	2.04	4.06	0	5.2	9.86	7.32	4.49	7.63	13.88	2.97	0	1.8	5.86	5.67	10.23	4.16	7.76	4.44	12.81	11.2	6.67	7.32	0	3	2	2	0	3	8	7	7	8	9	2	0	1	7	11	10	4	10	8	16	5	5	11	0	Chr01
Glyma.01G184200.Wm82.a2.v1	0	0	0	0.9	0	0	0.51	0	0	1.49	0	0	0	0	0	0	0	0	0	0.39	0	0	0.32	0	0	0	0	1	0	0	1	0	0	2	0	0	0	0	0	0	0	0	0	1	0	0	1	0	Chr01
Glyma.01G184300.Wm82.a2.v1	3.28	3.28	6.91	4.94	1.97	2.8	1.98	3.52	3.25	1.46	1.12	0.82	4.42	5.38	4.29	7.16	4.53	4.41	3.36	2.88	2.97	2.27	2.14	4.32	13	17	18	14	6	12	10	29	18	5	4	1	13	34	44	37	23	30	32	19	7	9	17	9	Chr01
Glyma.01G184400.Wm82.a2.v1	7.24	7.5	12.31	7.75	11.07	7.87	7.68	10.65	5.79	5.91	3.32	8.33	10.9	5.34	8.73	12.42	11.97	10.91	4.43	7.16	8.59	6.39	6.59	6.48	17	23	19	13	20	20	23	52	19	12	7	6	19	20	53	38	36	44	25	28	12	15	31	8	Chr01
Glyma.01G184500.Wm82.a2.v1	0.69	0.42	0.21	0	0.18	0.26	0.22	0.27	0.1	0	0.15	0	0.19	0.61	0.96	0.21	0.65	0.32	0.35	0.17	0	0	0.07	0.26	5	4	1	0	1	2	2	4	1	0	1	0	1	7	18	2	6	4	6	2	0	0	1	1	Chr01
Glyma.01G184600.Wm82.a2.v1	6.72	4.35	0	32.17	21.82	11.22	1.62	9.08	2.4	0	0	0	4.87	4.22	1.5	7.93	12.3	4.81	2.9	2.79	6.08	0.78	1.42	0.49	26	22	0	89	65	47	8	73	13	0	0	0	14	26	15	40	61	32	27	18	14	3	11	1	Chr01
Glyma.01G184700.Wm82.a2.v1	1.41	1.08	0.8	1.23	1.37	1.79	0.69	0.85	0.63	0.82	0.78	0.57	1.42	0.77	1.7	1.49	0.96	1.44	0.51	0.85	0.3	0.18	0.35	0.34	8	8	3	5	6	11	5	10	5	4	4	1	6	7	25	11	7	14	7	8	1	1	4	1	Chr01
Glyma.01G184900.Wm82.a2.v1	11.39	6.23	0	0	0	0	0	0	0	0	0	0	2.19	8.16	6.92	0	1.27	0	0	0	0	0	0	0	7	5	0	0	0	0	0	0	0	0	0	0	1	8	11	0	1	0	0	0	0	0	0	0	Chr01
Glyma.01G185000.Wm82.a2.v1	0	0.7	0	0	0	0.84	0	0	0	0	0	0	1.23	1.15	0	0	0	0	0	0	0	0	0	0	0	1	0	0	0	1	0	0	0	0	0	0	1	2	0	0	0	0	0	0	0	0	0	0	Chr01
Glyma.01G185200.Wm82.a2.v1	5.16	2.96	2.61	16.82	5.58	6.75	2.69	9.71	3.68	1.49	2.39	2.8	2.89	5.12	3.82	6.59	7.04	7.25	5.54	4.38	3.61	2.15	2.36	8.17	12	9	4	28	10	17	8	47	12	3	5	2	5	19	23	20	21	29	31	17	5	5	11	10	Chr01
Glyma.01G185300.Wm82.a2.v1	12.37	12.13	10.58	16.22	9.54	12.5	4.24	11.9	5.25	2.68	4.73	7.56	10.93	12.12	9.71	17.5	12.67	11.7	6.91	5.8	7.79	3.09	3.86	4.41	32	41	18	30	19	35	14	64	19	6	11	6	21	50	65	59	42	52	43	25	12	8	20	6	Chr01
Glyma.01G185400.Wm82.a2.v1	9.84	1.88	17.95	7.56	6.39	6.36	8.87	9.7	5.98	2.27	2.19	6.41	9.27	8.94	12.17	10.19	6.14	6.58	10.43	7.38	3.3	2.95	4.66	7.48	20	5	24	11	10	14	23	41	17	4	4	4	14	29	64	27	16	23	51	25	4	6	19	8	Chr01
Glyma.01G185500.Wm82.a2.v1	2.6	2.98	2.96	7.26	4.21	3	0	0.94	0.46	0	0	0	2.62	2.44	4.51	2.49	3.04	1.51	0.54	0	0	0	0	0	4	6	3	8	5	5	0	3	1	0	0	0	3	6	18	5	6	4	2	0	0	0	0	0	Chr01
Glyma.01G185600.Wm82.a2.v1	2.77	5.3	7.38	0	0.9	0	0.54	1.33	0	0	0	0	2.8	4.78	6.7	1.59	0.54	0.4	0.86	0	0	0	0	0	4	10	7	0	1	0	1	4	0	0	0	0	3	11	25	3	1	1	3	0	0	0	0	0	Chr01
Glyma.01G185700.Wm82.a2.v1	2.69	8.22	8.17	6.1	6.98	4.34	3.16	5.01	5.76	1.94	3.36	2.19	5.88	6.95	8.05	5.92	6.81	6.25	7.54	5.84	0.56	4.7	3.35	7.03	8	32	16	13	16	14	12	31	24	5	9	2	13	33	62	23	26	32	54	29	1	14	20	11	Chr01
Glyma.01G185800.Wm82.a2.v1	0	0	0.63	4.02	2.13	0.38	0.64	1.58	1.76	0.48	0.91	0	1.11	0.77	0.16	3.15	0	1.2	0.68	0.99	0	0.82	0.41	0.78	0	0	1	7	4	1	2	8	6	1	2	0	2	3	1	10	0	5	4	4	0	2	2	1	Chr01
Glyma.01G185900.Wm82.a2.v1	64.39	53.66	166.97	39.46	50.96	23.21	30.76	27.14	30.89	21.4	17.17	17.24	71.24	45.63	65.8	22.32	27.18	24.38	25.12	25.41	22.96	16.76	15.63	25.16	146	159	249	64	89	57	89	128	98	42	35	12	120	165	386	66	79	95	137	96	31	38	71	30	Chr01
Glyma.01G186000.Wm82.a2.v1	28.93	24.32	44.53	49.92	43.12	31	34.14	35.2	42.62	23.52	23.44	22.1	44.23	25.08	29.26	47.38	35.93	33.04	33.85	32.57	32.98	31.42	30.12	31.92	81	89	82	100	93	94	122	205	167	57	59	19	92	112	212	173	129	159	228	152	55	88	169	47	Chr01
Glyma.01G186100.Wm82.a2.v1	4.09	3.13	2.07	10.16	5.31	7.13	2.14	4.58	2.27	1.57	0	0	3.67	3.42	2.46	3.83	6.73	4.49	2.27	1.64	0.76	0	1.13	1.73	9	9	3	16	9	17	6	21	7	3	0	0	6	12	14	11	19	17	12	6	1	0	5	2	Chr01
Glyma.01G186300.Wm82.a2.v1	0.74	7.36	0.56	0	0.96	2.39	3.19	0.71	2.12	1.28	2.06	1.21	9.47	3.48	3.58	1.14	1.44	2.58	3.54	1.55	2.49	2.59	2.4	1.41	2	26	1	0	2	7	11	4	8	3	5	1	19	15	25	4	5	12	23	7	4	7	13	2	Chr01
Glyma.01G186400.Wm82.a2.v1	23.81	21.36	16.85	20.66	39.43	19.71	12.22	21.71	19.65	13.28	9.13	8.02	9.95	17.76	16.98	24.55	25.93	23.64	18.26	15.52	22.05	13.13	8.81	10.15	58	68	27	36	74	52	38	110	67	28	20	6	18	69	107	78	81	99	107	63	32	32	43	13	Chr01
Glyma.01G186500.Wm82.a2.v1	0	0.67	1.33	0	0	0	0	0	0	1.01	0	0	0	2.2	0.68	0	0.68	1.02	0	0	0	0	0	0	0	1	1	0	0	0	0	0	0	1	0	0	0	4	2	0	1	2	0	0	0	0	0	0	Chr01
Glyma.01G186600.Wm82.a2.v1	35.92	45.6	93.71	47.36	44.51	33.92	22.07	44.94	25.67	12.73	12.71	10.64	70.33	57.07	70.05	36	38.84	33.25	23.93	32.82	18.5	13.06	18.13	15.52	88	146	151	83	84	90	69	229	88	27	28	8	128	223	444	115	122	140	141	134	27	32	89	20	Chr01
Glyma.01G186800.Wm82.a2.v1	165.42	174.86	44.76	137.18	160.15	261.49	283.42	173.54	247.97	146.6	166.07	125.59	212.3	216.67	205.09	215.04	152.53	209.22	203.42	164.03	181.24	110.02	182.59	133.29	236	326	42	140	176	404	516	515	495	181	213	55	225	493	757	400	279	513	698	390	154	157	522	100	Chr01
Glyma.01G186900.Wm82.a2.v1	0	0	0	0	0	0	0	0.25	0	0	0	0	0	0	0	0	0	0	0	0	0	0	0	0	0	0	0	0	0	0	0	1	0	0	0	0	0	0	0	0	0	0	0	0	0	0	0	0	Chr01
Glyma.01G187300.Wm82.a2.v1	3.36	3.54	2.56	2.94	6	6.79	2.8	3.94	5.11	2.67	4.44	4.79	5.38	3.3	3.09	7.09	6.39	3.91	5.51	5.05	7.41	4.83	3.78	5.2	16	22	8	10	22	35	17	39	34	11	19	7	19	25	38	44	39	32	63	40	21	23	36	13	Chr01
Glyma.01G187400.Wm82.a2.v1	2.99	4.36	0.22	6.17	5.55	6.31	1.12	4.45	1.02	0	0.16	0	3.07	2.32	1.27	6.55	6	3.98	2.07	0.6	0.96	0.85	0.36	0.54	21	40	1	31	30	48	10	65	10	0	1	0	16	26	23	60	54	48	35	7	4	6	5	2	Chr01
Glyma.01G187500.Wm82.a2.v1	0	0.29	0	1.06	0	0	0	0	0	0	0	0	0	0.24	0.15	0	0.59	0	0	0	0	0	0	0	0	1	0	2	0	0	0	0	0	0	0	0	0	1	1	0	2	0	0	0	0	0	0	0	Chr01
Glyma.01G187600.Wm82.a2.v1	6.8	5.21	14.22	7.73	11.04	8.64	6	7.77	5.17	1.97	4.73	5.54	7.44	7.2	4.27	7.83	6.96	4.45	4.24	2.55	7.14	3.4	5.94	4.04	16	16	22	13	20	22	18	38	17	4	10	4	13	27	26	24	21	18	24	10	10	8	28	5	Chr01
Glyma.01G187700.Wm82.a2.v1	1.9	2.91	9.64	14.18	16.45	8.78	4.97	12.19	4.08	1.46	0	0	5.12	5.17	1.96	11.18	9.39	12.17	10.54	6.85	5.32	0	1.58	0	3	6	10	16	20	15	10	40	9	2	0	0	6	13	8	23	19	33	40	18	5	0	5	0	Chr01
Glyma.01G187800.Wm82.a2.v1	0.72	1.1	4.36	5.01	0	1.32	0.56	1.72	0.51	2.48	0	0	1.93	1.35	3.05	2.2	0.56	1.25	1.49	0	1.2	0.72	2.5	0	1	2	4	5	0	2	1	5	1	3	0	0	2	3	11	4	1	3	5	0	1	1	7	0	Chr01
Glyma.01G187900.Wm82.a2.v1	2.98	2.56	3.39	11.44	5.79	10.3	5.54	6.97	5.85	4.3	4.96	1.21	5.51	3.73	3.31	12.55	8.7	7.14	6.5	5.8	6.87	4.09	3.16	6.37	8	9	6	22	12	30	19	39	22	10	12	1	11	16	23	44	30	33	42	26	11	11	17	9	Chr01
Glyma.01G188000.Wm82.a2.v1	5.14	8.23	4.27	3.92	8.8	7.34	3.85	4.5	3.51	1.89	2.08	0.76	5.66	5.72	4.07	4.84	8.21	4.35	2.72	2.67	2.36	1.87	1.52	1.78	22	46	12	12	29	34	21	40	21	7	8	1	18	39	45	27	45	32	28	19	6	8	13	4	Chr01
Glyma.01G188100.Wm82.a2.v1	9.02	5.37	10.66	9.1	5.85	10.18	7.46	10.36	7.16	7.53	8.36	1.63	7.42	5.65	4.26	10.37	8.99	12.24	8.75	11.72	9.25	8.01	8.5	9.53	18	14	14	13	9	22	19	43	20	13	15	1	11	18	22	27	23	42	42	39	11	16	34	10	Chr01
Glyma.01G188200.Wm82.a2.v1	5.25	6.99	5.32	1.9	2.52	1.8	1.22	0.75	1.11	0.9	0.43	0.63	4.97	3.66	5.11	2.83	3.19	1.58	1.37	1.52	1.63	0.78	0.68	1.11	27	47	18	7	10	10	8	8	8	4	2	1	19	30	68	19	21	14	17	13	5	4	7	3	Chr01
Glyma.01G188300.Wm82.a2.v1	0	0	0	0	0	0	0	0	0	0	0	0	0	0	0	0	0	0	0	0.39	0	0	0	0	0	0	0	0	0	0	0	0	0	0	0	0	0	0	0	0	0	0	0	1	0	0	0	0	Chr01
Glyma.01G188400.Wm82.a2.v1	10.74	10.33	10.73	12.01	11.95	12.75	4.09	12.1	6.36	1.42	2.39	2	10.33	11.16	9.49	13.18	12.69	8.93	6.76	5.16	5.67	3.38	2.45	2.92	35	44	23	28	30	45	17	82	29	4	7	2	25	58	80	56	53	50	53	28	11	11	16	5	Chr01
Glyma.01G188500.Wm82.a2.v1	22.53	13.96	17.94	12.75	9.05	5.94	7.57	8.77	4.6	8.68	5.37	0	13	22.54	20.94	10.7	8.37	9.68	6.91	8.37	7.21	6.97	5.09	5.1	42	34	22	17	13	12	18	34	12	14	9	0	18	67	101	26	20	31	31	26	8	13	19	5	Chr01
Glyma.01G188600.Wm82.a2.v1	11.07	4.89	16.83	4.76	9.39	5.5	5	4.3	3.04	2.95	2.84	5.55	5.16	11.48	11.85	1.63	4.32	5.94	3.36	3.07	1.43	1.7	1.06	1.62	26	15	26	8	17	14	15	21	10	6	6	4	9	43	72	5	13	24	19	12	2	4	5	2	Chr01
Glyma.01G188700.Wm82.a2.v1	16.63	13.57	9.27	24.02	17.27	14.84	14.77	20.79	16.24	16.65	12.33	7.22	14.18	11.12	12.43	8.93	14.27	10	15.67	13.64	13.96	10.53	10.23	11.59	30	32	11	31	24	29	34	78	41	26	20	4	19	32	58	21	33	31	68	41	15	19	37	11	Chr01
Glyma.01G188900.Wm82.a2.v1	33.76	47.86	53.86	47.2	38.08	33.22	20.82	26.34	20.17	14.71	13.54	7.21	38.74	37.13	38.08	29.29	36.69	26.73	23.93	18.6	24.16	13.28	9.94	16.84	61	113	64	61	53	65	48	99	51	23	22	4	52	107	178	69	85	83	104	56	26	24	36	16	Chr01
Glyma.01G189000.Wm82.a2.v1	6.51	0.71	30.41	9.75	14.49	9.88	28.06	25.04	32.57	6.99	5.17	0	1.88	1.75	4.49	17.12	12.7	36.53	40.8	53.3	34.36	9.76	17.41	14.15	14	2	43	15	24	23	77	112	98	13	10	0	3	6	25	48	35	135	211	191	44	21	75	16	Chr01
Glyma.01G189100.Wm82.a2.v1	3.92	2.7	3.58	4.94	4.59	3.62	7.69	3.77	5.89	1.36	4.37	0	4.75	3.94	2.88	3.61	3.98	4.34	3.75	6.36	2.64	6.28	3.33	1.49	10	9	6	9	9	10	25	20	21	3	10	0	9	16	19	12	13	19	23	27	4	16	17	2	Chr01
Glyma.01G189200.Wm82.a2.v1	10.66	4.7	8.35	0.9	2.94	4.48	3.8	1.86	3	0.37	1.44	1.05	10.01	8.51	14.61	3.47	1.51	3.2	4.17	6.59	7.05	4.52	1.77	1.23	33	19	17	2	7	15	15	12	13	1	4	1	23	42	117	14	6	17	31	34	13	14	11	2	Chr01
Glyma.01G189300.Wm82.a2.v1	1.72	0.33	0.65	0	0	0.4	0.34	0	0.31	0.5	0.48	0	0.58	0.81	0.83	0	0.34	0.25	0	1.03	0	0	0.43	0	4	1	1	0	0	1	1	0	1	1	1	0	1	3	5	0	1	1	0	4	0	0	2	0	Chr01
Glyma.01G189400.Wm82.a2.v1	10.37	7.52	5.81	12.2	9.21	11.59	4.28	15.74	7.41	6.31	4.25	3.56	13.96	11.97	12.44	11.72	14.9	7.3	8.39	7.86	1.83	2.73	3.27	7.26	19	18	7	16	13	23	10	60	19	10	7	2	19	35	59	28	35	23	37	24	2	5	12	7	Chr01
Glyma.01G189500.Wm82.a2.v1	7.31	8.75	3.38	5.33	5.77	6.45	2.99	5.5	2.5	2.2	2.47	2.07	11.12	11.95	13.02	5.85	7.43	7.95	5.68	4.77	3.2	1.59	0.95	4.23	23	36	7	12	14	22	12	36	11	6	7	2	26	60	106	24	30	43	43	25	6	5	6	7	Chr01
Glyma.01G189600.Wm82.a2.v1	5.9	2.26	9.53	5.67	3.83	4.09	4.05	5.32	5.53	5.54	3.69	1.2	2.98	6.47	4.85	8.49	6.04	4.51	3.99	3.98	4.33	4.06	3.13	3.51	16	8	17	11	8	12	14	30	21	13	9	1	6	28	34	30	21	21	26	18	7	11	17	5	Chr01
Glyma.01G189700.Wm82.a2.v1	6.59	6.83	1.18	2.17	3.02	1.43	0.3	1.49	1.11	0.9	0.43	0	12.01	11.43	12.44	4.16	1.21	1.58	1.45	0	0.65	1.16	0.39	0	17	23	2	4	6	4	1	8	4	2	1	0	23	47	83	14	4	7	9	0	1	3	2	0	Chr01
Glyma.01G189800.Wm82.a2.v1	2.83	2.6	5.17	0	0	0.52	0.44	1.36	0.81	0.65	0	0	6.87	2.13	3.94	0.43	2.21	0.33	0.71	0	0	0	0.28	1.08	5	6	6	0	0	1	1	5	2	1	0	0	9	6	18	1	5	1	3	0	0	0	1	1	Chr01
Glyma.01G189900.Wm82.a2.v1	2.19	1.68	0	3.07	2.85	0	0	2.64	0	0	0	0	4.43	3.44	8.48	1.68	0.86	0.64	0.91	0.66	0	0	0	0	2	2	0	2	2	0	0	5	0	0	0	0	3	5	20	2	1	1	2	1	0	0	0	0	Chr01
Glyma.01G190000.Wm82.a2.v1	7.39	7.54	1.5	11.02	14.72	19.12	4.63	10.66	1.76	1.14	0.55	0	5.31	6.49	1.52	12.1	24.22	10.04	1.64	2.37	1.66	0.49	0.74	0	15	20	2	16	23	42	12	45	5	2	1	0	8	21	8	32	63	35	8	8	2	1	3	0	Chr01
Glyma.01G190100.Wm82.a2.v1	10.54	9.25	17.44	18.64	10.87	12.31	19.68	15.35	14.18	2.87	7.93	8.08	17.11	15.55	18.81	16.41	12.09	15.87	21.14	12.28	13.01	4.65	5.72	5.9	34	39	37	43	27	43	81	103	64	8	23	8	41	80	157	69	50	88	164	66	25	15	37	10	Chr01
Glyma.01G190300.Wm82.a2.v1	2.28	11.07	24.31	14.9	23.72	24.6	53.69	14.27	58.76	74.78	52.5	47.12	5.12	7.16	7.36	9.93	4.75	3.1	41.15	58.93	53.68	94.38	7.98	91.21	3	19	21	14	24	35	90	39	108	85	62	19	5	15	25	17	8	7	130	129	42	124	21	63	Chr01
Glyma.01G190500.Wm82.a2.v1	29.11	33.8	21.37	26.67	45.62	41.72	26.75	27.03	25.11	16.24	14.52	6.54	25.68	27.7	28.33	24.64	39.94	28.62	27.13	24.7	25.28	9.03	18.54	3.82	29	44	14	19	35	45	34	56	35	14	13	2	19	44	73	32	51	49	65	41	15	9	37	2	Chr01
Glyma.01G190600.Wm82.a2.v1	0.38	0.58	0	0.53	1.47	1.4	0.59	1.27	1.08	5.68	4.62	6.16	0	0.95	1.61	2.03	1.18	1.54	0.94	0.23	0	0	1.13	3.59	1	2	0	1	3	4	2	7	4	13	11	5	0	4	11	7	4	7	6	1	0	0	6	5	Chr01
Glyma.01G190700.Wm82.a2.v1	2.22	3.96	0	1.55	1.92	2.73	3.19	2.85	1.85	0.43	2.88	3.62	2.99	3.02	3	1.7	2.89	5.17	2.77	2.89	3.73	2.96	2.95	2.81	6	14	0	3	4	8	11	16	7	1	7	3	6	13	21	6	10	24	18	13	6	8	16	4	Chr01
Glyma.01G190800.Wm82.a2.v1	0.96	0.24	2.43	0.45	0.83	1.18	0.75	1.38	0.23	0.74	0.71	0	2.15	0.6	0.49	1.47	0.75	0.74	1.33	2.49	1.61	2.55	0.96	1.82	3	1	5	1	2	4	3	9	1	2	2	0	5	3	4	6	3	4	10	13	3	8	6	3	Chr01
Glyma.01G190900.Wm82.a2.v1	135.97	193.17	16.82	20.92	33.78	39.65	10.2	22.52	9.3	0.75	1.45	0	189.17	270.46	151.64	29.94	35.52	29.53	10.28	4.68	6.55	0	2.6	0	209	388	17	23	40	66	20	72	20	1	2	0	216	663	603	60	70	78	38	12	6	0	8	0	Chr01
Glyma.01G191100.Wm82.a2.v1	4.63	1.92	4.11	5.13	4.01	3.92	2.87	4.08	2.34	4.01	3.01	2.51	3.64	3.15	3.8	2.37	3.01	3.48	2.25	2.78	3.24	2.12	3.76	3.3	24	13	14	19	16	22	19	44	17	18	14	4	14	26	51	16	20	31	28	24	10	11	39	9	Chr01
Glyma.01G191200.Wm82.a2.v1	1.03	2.77	7.86	0	0	0	0	0.25	0.37	0	0.57	0	0	0.65	1.6	0.4	0	0	0.64	0	0	0	0	0	2	7	10	0	0	0	0	1	1	0	1	0	0	2	8	1	0	0	3	0	0	0	0	0	Chr01
Glyma.01G191300.Wm82.a2.v1	0	2.06	2.46	0.75	0	0	0.85	0.52	0.39	0.62	0	0	0.73	0.34	1.46	0	0.84	0.31	0.45	0.32	0	0	0.54	0	0	5	3	1	0	0	2	2	1	1	0	0	1	1	7	0	2	1	2	1	0	0	2	0	Chr01
Glyma.01G191400.Wm82.a2.v1	2.89	5.06	3.14	0.58	0.54	1.53	0	0.2	0.59	0	0	0	5	2.33	2.87	0	1.93	0.48	0	0.5	0	0	0	1.57	7	16	5	1	1	4	0	1	2	0	0	0	9	9	18	0	6	2	0	2	0	0	0	2	Chr01
Glyma.01G191500.Wm82.a2.v1	0	0	0	0	0	0	0	0	0	0	0	0	0	0	0	0	0	0	0	0.15	0.42	0.25	0	0	0	0	0	0	0	0	0	0	0	0	0	0	0	0	0	0	0	0	0	1	1	1	0	0	Chr01
Glyma.01G191600.Wm82.a2.v1	3.03	3.31	5.92	3.02	2.25	7.59	4.74	5.82	5.25	4	1.44	0	1.75	3.25	1.67	6.63	5.4	8.56	12.05	7.01	8.71	4.76	7.12	10.69	7	10	9	5	4	19	14	28	17	8	3	0	3	12	10	20	16	34	67	27	12	11	33	13	Chr01
Glyma.01G191700.Wm82.a2.v1	1.7	1.62	0	3.56	1.65	2.35	2.99	3.06	2.12	2.45	1.89	0	0	1.86	0.33	1.63	2.32	3.95	5.82	11.21	7.84	2.97	3.81	4.04	4	5	0	6	3	6	9	15	7	5	4	0	0	7	2	5	7	16	33	44	11	7	18	5	Chr01
Glyma.01G191800.Wm82.a2.v1	1.32	1.21	0.8	1.11	1.03	1.22	0.21	1.91	0.19	0	1.18	0	4.63	3.15	4.19	3.65	3.51	1.08	1.21	1.11	1.33	0.79	0.79	2.01	5	6	2	3	3	5	1	15	1	0	4	0	13	19	41	18	17	7	11	7	3	3	6	4	Chr01
Glyma.01G191900.Wm82.a2.v1	5.85	5.49	7.68	2.97	1.04	1.23	0.63	1.92	1.52	1.23	0.89	1.73	13.24	9.17	11.72	1.63	0.83	1.86	1.66	1.6	1.34	0.53	0.8	1.52	22	27	19	8	3	5	3	15	8	4	3	2	37	55	114	8	4	12	15	10	3	2	6	3	Chr01
Glyma.01G192000.Wm82.a2.v1	198.11	197.08	276.34	263.71	261.66	250.55	188.32	217.82	187.76	131.39	138.92	72.96	184.36	182.01	200.09	208.1	241.19	235.55	182.29	132.32	144.62	97.31	122.93	121.21	230	299	211	219	234	315	279	526	305	132	145	26	159	337	601	315	359	470	509	256	100	113	286	74	Chr01
Glyma.01G192100.Wm82.a2.v1	44.77	45.03	38.25	38.75	24.91	23.63	10.36	23.37	17.68	10.35	9.96	9.72	35.59	27.27	35.6	18.31	16.3	11.41	10.11	11	11.46	5.12	8.51	8.92	105	138	59	65	45	60	31	114	58	21	21	7	62	102	216	56	49	46	57	43	16	12	40	11	Chr01
Glyma.01G192200.Wm82.a2.v1	7.93	5.62	9.37	2.05	1.91	4.61	0.92	3.39	1.05	0.34	1.63	0	10.27	7.91	7.72	4.28	4.35	1.88	2.07	1.23	2.46	1.76	1.17	0.56	27	25	21	5	5	17	4	24	5	1	5	0	26	43	68	19	19	11	17	7	5	6	8	1	Chr01
Glyma.01G192300.Wm82.a2.v1	6.62	5.27	3.62	0	0	0	0	0.13	0.19	0	0.29	0	10.34	6.14	7.47	0.2	0	0	0	0.16	0	0	0	0	25	26	9	0	0	0	0	1	1	0	1	0	29	37	73	1	0	0	0	1	0	0	0	0	Chr01
Glyma.01G192400.Wm82.a2.v1	1.19	0.3	0	0	0	0	0	0	0	0	0	0	0.53	0.99	2.91	0	0	0	0	0	0	0	0	0	3	1	0	0	0	0	0	0	0	0	0	0	1	4	19	0	0	0	0	0	0	0	0	0	Chr01
Glyma.01G192500.Wm82.a2.v1	95.31	70.36	8.52	1.57	5.82	9.32	16.26	7.01	9.22	5.83	13.72	12.78	215.09	106.51	187.44	16.77	6.56	8.16	13.99	12.78	15.06	6.73	16.23	12.79	170	164	10	2	8	18	37	26	23	9	22	7	285	303	865	39	15	25	60	38	16	12	58	12	Chr01
Glyma.01G192600.Wm82.a2.v1	20.07	16.87	17.51	68.09	53.4	51.66	20.12	45.25	19.05	15.21	11.35	7.5	16.39	12.79	13.48	23.22	36.96	29.1	13.41	19.94	12.16	11.84	12.48	11.89	61	67	35	148	125	170	78	286	81	40	31	7	37	62	106	92	144	152	98	101	22	36	76	19	Chr01
Glyma.01G192700.Wm82.a2.v1	1.08	0.83	0	0	1.41	1	0.85	0.52	0	0	0	0	0	2.71	2.09	0	0	0	0	0.65	0	1.08	0	0	1	1	0	0	1	1	1	1	0	0	0	0	0	4	5	0	0	0	0	1	0	1	0	0	Chr01
Glyma.01G192900.Wm82.a2.v1	2.17	0.71	0.94	6.07	5.63	1.43	1.21	2.53	1.33	0	0.34	1.01	0.42	1.55	1.2	3.09	1.69	2.34	1.29	0.56	1.04	0.93	0.77	0	7	3	2	14	14	5	5	17	6	0	1	1	1	8	10	13	7	13	10	3	2	3	5	0	Chr01
Glyma.01G193000.Wm82.a2.v1	0	0	0	0	0.51	0	0	0	0	0	0	0	0	0	0	0	0	0	0	0	0	0	0	0	0	0	0	0	1	0	0	0	0	0	0	0	0	0	0	0	0	0	0	0	0	0	0	0	Chr01
Glyma.01G193100.Wm82.a2.v1	2.12	5.2	2.58	9.5	4.96	9.02	1.33	7.96	1.52	1.47	0.94	5.53	3.43	3.46	1.48	7.49	9.94	6.67	1.24	1.27	2.14	0.42	1.06	0	5	16	4	16	9	23	4	39	5	3	2	4	6	13	9	23	30	27	7	5	3	1	5	0	Chr01
Glyma.01G193200.Wm82.a2.v1	5.55	3.27	2.6	1.49	2.22	2.17	2.85	3.39	1.37	1.48	1.66	0	2.3	5.36	6.03	2.62	2.17	2.73	1.86	2.95	2.15	1.49	1.71	1.62	26	20	8	5	8	11	17	33	9	6	7	0	8	40	73	16	13	22	21	23	6	7	16	4	Chr01
Glyma.01G193400.Wm82.a2.v1	0.34	0.52	0	0	0	0	0	0	0	0	0	0	0.91	0	0.13	0	0.26	0	0	0	0	0	0	0	1	2	0	0	0	0	0	0	0	0	0	0	2	0	1	0	1	0	0	0	0	0	0	0	Chr01
Glyma.01G193500.Wm82.a2.v1	0.36	0.14	0	1.51	2.1	1.83	0.28	0.69	0.13	0	0	0	0.48	0.9	0.28	1.93	2.67	1.36	0.75	0.54	0	0.18	0.09	0	2	1	0	6	9	11	2	8	1	0	0	0	2	8	4	14	19	13	10	5	0	1	1	0	Chr01
Glyma.01G193600.Wm82.a2.v1	1.26	0.69	0	1.01	2.1	1.16	0.85	1.21	0.39	0.42	0.2	0	1.7	0.68	0.7	0.55	1.54	0.94	1.05	1.08	0	0.18	0.09	0	7	5	0	4	9	7	6	14	3	2	1	0	7	6	10	4	11	9	14	10	0	1	1	0	Chr01
Glyma.01G193700.Wm82.a2.v1	20.46	30.59	9.41	14.64	8.65	11.43	3.73	11.9	6.12	4.4	3.18	0	33.31	45.36	40.29	10.22	16.7	8.86	5.74	6.85	8.79	3.33	2.61	8.15	43	84	13	22	14	26	10	52	18	8	6	0	52	152	219	28	45	32	29	24	11	7	11	9	Chr01
Glyma.01G193800.Wm82.a2.v1	97.26	106.41	26.89	86.52	77.22	123.96	70.55	88.11	56.87	29.72	52.75	13.09	59.51	114.41	97.87	57.95	90.28	95.41	78.87	76.21	39.14	24.91	37.71	24.46	121	173	22	77	74	167	112	228	99	32	59	5	55	227	315	94	144	204	236	158	29	31	94	16	Chr01
Glyma.01G193900.Wm82.a2.v1	2.05	0.31	0	2.29	1.06	0	0	0.79	0.59	0.95	0	0	0	0.26	0.32	1.57	0.64	0	0.17	1.48	0	0	0.2	0.78	5	1	0	4	2	0	0	4	2	2	0	0	0	1	2	5	2	0	1	6	0	0	1	1	Chr01
Glyma.01G194000.Wm82.a2.v1	0.34	0	0	0	0	0	0	0	0	0	0	1.11	0	0.21	0.13	0.26	0.53	0	0	0.2	0	0.34	0.34	1.3	1	0	0	0	0	0	0	0	0	0	0	1	0	1	1	1	2	0	0	1	0	1	2	2	Chr01
Glyma.01G194100.Wm82.a2.v1	4.05	5.25	5.21	2.61	6.48	6.05	4.89	4.05	4.9	1.44	1.04	3.05	7.97	6.65	7.47	8.13	7.78	7.62	3.76	4.68	3.66	4.68	3.58	1.78	13	22	11	6	16	21	20	27	22	4	3	3	19	34	62	34	32	42	29	25	7	15	23	3	Chr01
Glyma.01G194200.Wm82.a2.v1	2.71	3.46	0.92	1.69	1.96	3.06	1.89	3.63	3.02	0.35	1.68	1.97	2.03	1.7	2.33	3.24	2.12	2.81	2.88	2.35	2.03	1.51	2.26	2.29	9	15	2	4	5	11	8	25	14	1	5	2	5	9	20	14	9	16	23	13	4	5	15	4	Chr01
Glyma.01G194300.Wm82.a2.v1	1.68	3.85	3.57	3.75	1.74	1.86	0.79	1.61	1.44	0.39	0.75	0	0	0.84	1.95	0.51	2.09	1.95	0.7	0.4	1.13	0.67	1.67	0.64	5	15	7	8	4	6	3	10	6	1	2	0	0	4	15	2	8	10	5	2	2	2	10	1	Chr01
Glyma.01G194500.Wm82.a2.v1	23.7	13.16	14.84	12.34	14.48	13.3	4.73	9.16	8.97	2.15	0.52	0	20.02	19.23	17.43	12.12	16.68	14.6	4.83	4.74	4.68	1.39	3.71	2.65	51	37	21	19	24	31	13	41	27	4	1	0	32	66	97	34	46	54	25	17	6	3	16	3	Chr01
Glyma.01G194600.Wm82.a2.v1	6.95	7.51	12.43	6.86	14.86	5.66	4.81	7.47	9.35	4.25	3.18	2.66	6.05	7.18	6.8	12.86	9.89	8.8	9.01	4.66	2.06	2.86	3.67	2.33	17	24	20	12	28	15	15	38	32	9	7	2	11	28	43	41	31	37	53	19	3	7	18	3	Chr01
Glyma.01G194700.Wm82.a2.v1	3.58	2.37	5.08	3.34	5.27	7.94	7.48	15.49	11.43	7.17	6.64	5.44	1.29	2.1	1.48	9.7	10.8	14.86	13	12.46	10.82	9.31	9.29	12.71	15	13	14	10	17	36	40	135	67	26	25	7	4	14	16	53	58	107	131	87	27	39	78	28	Chr01
Glyma.01G194800.Wm82.a2.v1	1.73	4.78	0.53	2.91	4.05	5.12	0.82	5.5	0.25	0.4	0.77	0	0.93	4.13	2.41	2.66	3.25	2.83	2.02	2.08	0.58	2.77	0.69	1.98	5	18	1	6	9	16	3	33	1	1	2	0	2	19	18	10	12	14	14	10	1	8	4	3	Chr01
Glyma.01G194900.Wm82.a2.v1	8.59	4.6	11.1	13.21	16.17	9.91	9.42	9.5	7.37	6.45	3.34	9.79	5.78	5.12	7.47	7.9	13.06	9.49	7.68	7.73	6.49	5.58	6.64	3.27	20	14	17	22	29	25	28	46	24	13	7	7	10	19	45	24	39	38	43	30	9	13	31	4	Chr01
Glyma.01G195000.Wm82.a2.v1	14.37	17.71	7.89	48.53	30.05	14	3.75	7.87	4.85	2.31	3.11	0	15.58	20.27	17.58	18.98	18.05	10.22	7.47	5.75	3.35	3.19	2.19	3.79	36	58	13	87	58	38	12	41	17	5	7	0	29	81	114	62	58	44	45	24	5	8	11	5	Chr01
Glyma.01G195100.Wm82.a2.v1	3.42	2.62	3.12	2.87	8.88	3.16	1.07	4.27	1.96	0.79	0.76	0	0.92	3.43	2.11	2.1	3.2	1.99	0.85	1.23	1.15	0.68	0.68	0	5	5	3	3	10	5	2	13	4	1	1	0	1	8	8	4	6	5	3	3	1	1	2	0	Chr01
Glyma.01G195200.Wm82.a2.v1	3.41	2.41	4.79	1.1	1.36	1.45	1.64	0.63	0.56	0.3	0.29	0	1.77	2.96	2.94	0.8	2.05	1.22	0.55	0.94	0.44	0	0.39	0	13	12	12	3	4	6	8	5	3	1	1	0	5	18	29	4	10	8	5	6	1	0	3	0	Chr01
Glyma.01G195400.Wm82.a2.v1	12.99	10.6	25.67	12.11	10.12	9.2	8.82	10.2	6.81	5.5	4.33	1.41	13.99	18.19	16.23	8.3	11.48	8.31	7.56	9.87	2.91	2.6	2.59	6.59	30	32	39	20	18	23	26	49	22	11	9	1	24	67	97	25	34	33	42	38	4	6	12	8	Chr01
Glyma.01G195500.Wm82.a2.v1	0	0	1.02	0.94	1.3	0.93	0.79	0.32	0	0	0	0	0	0	0.26	1.03	0.26	0.78	0.14	0	0	0.33	0.33	0.64	0	0	2	2	3	3	3	2	0	0	0	0	0	0	2	4	1	4	1	0	0	1	2	1	Chr01
Glyma.01G195600.Wm82.a2.v1	0	0	0	0	0	0	0	0.19	0.28	0.46	0	0	0	0	0	0	0	0	0	0	0	0	0.2	0	0	0	0	0	0	0	0	1	1	1	0	0	0	0	0	0	0	0	0	0	0	0	1	0	Chr01
Glyma.01G195700.Wm82.a2.v1	1.25	2.88	0	26.26	11.38	2.31	3.93	6.62	5.37	1.45	8.36	4.08	0	1.57	1.94	1.92	1.95	3.64	2.6	0.75	0	2.5	3.75	7.14	1	3	0	15	7	2	4	11	6	1	6	1	0	2	4	2	2	5	5	1	0	2	6	3	Chr01
Glyma.01G195800.Wm82.a2.v1	3.42	0	0	0	0	0	0	0	0	0	0	0	0	0.54	0.33	0	0	0	0	0	0	0	0	0	4	0	0	0	0	0	0	0	0	0	0	0	0	1	1	0	0	0	0	0	0	0	0	0	Chr01
Glyma.01G195900.Wm82.a2.v1	2.5	1.67	0	1.31	0.41	1.15	0	0.6	0.45	0	0	0	0	0.59	0.48	0.48	0	0.36	0.52	0	0	0.62	0.16	0	8	7	0	3	1	4	0	4	2	0	0	0	0	3	4	2	0	2	4	0	0	2	1	0	Chr01
Glyma.01G196000.Wm82.a2.v1	4.61	3.53	4.67	8.59	2.66	1.89	4.01	2.71	1.46	1.78	2.28	0	5.52	8.03	7.72	4.32	2.4	3.28	3.62	1.84	1.72	0.51	1.28	0	9	9	6	12	4	4	10	11	4	3	4	0	8	25	39	11	6	11	17	6	2	1	5	0	Chr01
Glyma.01G196300.Wm82.a2.v1	8.05	6.47	4.28	7.31	5.75	8.92	4.1	6.58	3.16	1.86	1.34	2.62	7.58	6.05	7.93	8.33	8.16	8.9	7.7	5.07	8.11	10.86	4.82	8.42	20	21	7	13	11	24	13	34	11	4	3	2	14	24	51	27	26	38	46	21	12	27	24	11	Chr01
Glyma.01G196600.Wm82.a2.v1	19.57	11.03	18.79	14.4	13.37	16.17	2.82	14.36	4.42	2.38	2.86	8.39	4.85	16.47	20.3	8.29	16.87	18.58	10.92	6.18	3.46	3.09	5.14	2.94	38	28	24	20	20	34	7	58	12	4	5	5	7	51	102	21	42	62	51	20	4	6	20	3	Chr01
Glyma.01G196700.Wm82.a2.v1	2.43	0	0	3.4	7.89	2.24	0	5.84	2.61	0	0	0	1.64	0	0.47	0	0.95	2.12	1.01	1.46	0	1.21	0	2.31	2	0	0	2	5	2	0	10	3	0	0	0	1	0	1	0	1	3	2	2	0	1	0	1	Chr01
Glyma.01G196800.Wm82.a2.v1	20.39	10.17	13.48	0	0	0	0	0	0	0	0	0	34	12.5	28.43	0	0	0	0	0	0	0	0	0	46	30	20	0	0	0	0	0	0	0	0	0	57	45	166	0	0	0	0	0	0	0	0	0	Chr01
Glyma.01G196900.Wm82.a2.v1	0	0.58	0	0	0	0.7	0.6	0	0	0	0	0	0	0	0.29	0.58	0.59	0.88	0	0	0	0	0	0	0	1	0	0	0	1	1	0	0	0	0	0	0	0	1	1	1	2	0	0	0	0	0	0	Chr01
Glyma.01G197000.Wm82.a2.v1	0	0	0	0	0	0	0	0	0.92	0	0	0	0	0	0.5	0.99	0	0	0	0	0	0	0	0	0	0	0	0	0	0	0	0	1	0	0	0	0	0	1	1	0	0	0	0	0	0	0	0	Chr01
Glyma.01G197100.Wm82.a2.v1	14.66	11.72	8.91	20.04	15.65	16.54	9.7	13.47	10.01	4.52	4.71	3.18	10.96	10.01	17	11.74	14.23	10.99	10.56	9.19	9.84	4.23	5.2	6.81	45	47	18	44	37	55	38	86	43	12	13	3	25	49	135	47	56	58	78	47	18	13	32	11	Chr01
Glyma.01G197300.Wm82.a2.v1	0.47	0.36	0	1.96	1.22	0.86	0.37	1.58	0.67	2.16	0	0	0	0.88	0	0.36	2.19	0.54	0.39	0.28	3.15	0.47	0.7	0	1	1	0	3	2	2	1	7	2	4	0	0	0	3	0	1	6	2	2	1	4	1	3	0	Chr01
Glyma.01G197400.Wm82.a2.v1	0	0	0	0	0.72	0	0.65	0.93	1.19	1.28	1.23	0	0	0	0	0	0	0.64	0.58	1.99	2.32	0.55	1.38	1.58	0	0	0	0	2	0	3	7	6	4	4	0	0	0	0	0	0	4	5	12	5	2	10	3	Chr01
Glyma.01G197500.Wm82.a2.v1	61.41	37.4	16.44	6.65	2.81	1.6	2.37	3.74	3.71	0	1.44	1.41	56.47	71.31	113.66	2.32	3.37	1.51	1.8	1.3	1.45	0.86	1.51	2.47	142	113	25	11	5	4	7	18	12	0	3	1	97	263	680	7	10	6	10	5	2	2	7	3	Chr01
Glyma.01G197600.Wm82.a2.v1	1.5	1.43	1.14	2.62	2.67	2.59	1.76	2.16	2.01	0.43	0.42	0.61	1.51	2.35	1.88	2.3	1.75	3.49	3.19	1.24	2.51	0.94	1.59	0.71	8	10	4	10	11	15	12	24	15	2	2	1	6	20	26	16	12	32	41	11	8	5	17	2	Chr01
Glyma.01G197700.Wm82.a2.v1	0.45	0.34	3.41	0.63	0	0.41	0	0	0.32	0.52	0	0	0	0	0	0	0	0.52	0.37	0	2.26	0	0.45	0	1	1	5	1	0	1	0	0	1	1	0	0	0	0	0	0	0	2	2	0	3	0	2	0	Chr01
Glyma.01G197800.Wm82.a2.v1	12.34	14.08	6.25	16.64	16.01	21.78	14.75	24.97	14.85	12.25	8.67	7.76	13.98	15.33	16.31	25.56	24.98	26.44	25.82	17.4	14.17	8.01	9.4	8.23	57	85	19	55	57	109	87	240	96	49	36	11	48	113	195	154	148	210	287	134	39	37	87	20	Chr01
Glyma.01G197900.Wm82.a2.v1	0	0	0	0	0	0	0	0	0	0	0	0	0	0	0	0	0.34	0	0	0	0	0	0	0	0	0	0	0	0	0	0	0	0	0	0	0	0	0	0	0	1	0	0	0	0	0	0	0	Chr01
Glyma.01G198000.Wm82.a2.v1	0	0	0	0.76	2.83	0	0	1.31	1.17	0	0	0	0	0	0	3.34	1.7	1.9	2.94	0.65	1.83	0	0	0	0	0	0	1	4	0	0	5	3	0	0	0	0	0	0	8	4	6	13	2	2	0	0	0	Chr01
Glyma.01G198100.Wm82.a2.v1	0	4.82	0	2.59	2.41	0.68	0.29	3.74	0	0.43	0.82	0	1	0.47	0.29	0.85	2.31	1.73	3.24	1.56	1.87	0.37	1.3	0	0	17	0	5	5	2	1	21	0	1	2	0	2	2	2	3	8	8	21	7	3	1	7	0	Chr01
Glyma.01G198200.Wm82.a2.v1	1.91	1.1	0	2	1.24	0	0.75	1.84	0.34	0.55	0.53	0	1.93	0.3	0.37	1.1	2.61	1.39	1.19	0.29	0.8	0.96	0.24	0	4	3	0	3	2	0	2	8	1	1	1	0	3	1	2	3	7	5	6	1	1	2	1	0	Chr01
Glyma.01G198500.Wm82.a2.v1	11.93	4.89	25.27	4.17	5.53	3.54	8.68	10.04	9.44	9.36	8.53	6.94	14.34	6.68	12.52	6.54	4.99	6.7	8.33	10.48	8.59	8.1	11.06	8.91	28	15	39	7	10	9	26	49	31	19	18	5	25	25	76	20	15	27	47	41	12	19	52	11	Chr01
Glyma.01G198700.Wm82.a2.v1	0	0	0	0.79	0.74	0	2.66	1.63	2.83	0	0	5.53	0	0	0	0.87	2.21	0.33	1.18	2.04	0.95	0.57	2.54	0	0	0	0	1	1	0	6	6	7	0	0	3	0	0	0	2	5	1	5	6	1	1	9	0	Chr01
Glyma.01G198900.Wm82.a2.v1	3.5	6.84	1.18	4.89	3.53	7.89	2.13	7.28	2.78	1.8	0.43	0	4.71	6.58	2.85	3.87	6.36	3.39	4.2	2.1	1.96	0.39	0.78	2.96	9	23	2	9	7	22	7	39	10	4	1	0	9	27	19	13	21	15	26	9	3	1	4	4	Chr01
Glyma.01G199000.Wm82.a2.v1	0	1.36	0.54	0.5	0	0.33	0.56	0.86	0	0.41	0.79	1.16	0	0.67	0.55	0.55	0.56	0.21	0.44	0.21	0	0	0.18	0.68	0	5	1	1	0	1	2	5	0	1	2	1	0	3	4	2	2	1	3	1	0	0	1	1	Chr01
Glyma.01G199100.Wm82.a2.v1	33.42	36.83	21.34	32.7	32.1	33.33	16.76	26.35	19.11	13.9	18.59	4.35	35.99	25.98	26.09	25.12	32.32	28.78	21.12	14.04	26.93	9.36	13.01	11.44	50	72	21	35	37	54	32	82	40	18	25	2	40	62	101	49	62	74	76	35	24	14	39	9	Chr01
Glyma.01G199200.Wm82.a2.v1	1.15	1.32	1.75	0.8	0	2.13	1.8	2.21	1.65	0	0.64	0	0	0.72	1.11	4.41	3.14	3.35	2.15	0.35	0	0	1.72	1.09	2	3	2	1	0	4	4	8	4	0	1	0	0	2	5	10	7	10	9	1	0	0	6	1	Chr01
Glyma.01G199300.Wm82.a2.v1	0.35	1.59	0	2.9	0.45	1.6	0	1.5	0.25	1.2	0.77	0	0.47	1.3	0.67	0.8	0.27	1.01	0.72	0.42	0.58	0	0.17	0	1	6	0	6	1	5	0	9	1	3	2	0	1	6	5	3	1	5	5	2	1	0	1	0	Chr01
Glyma.01G199400.Wm82.a2.v1	0	0.27	0.54	0	0	0	0	0	0	0	0	0	0	0.45	0.27	0	0	0	0	0	0	0	0	0	0	1	1	0	0	0	0	0	0	0	0	0	0	2	2	0	0	0	0	0	0	0	0	0	Chr01
Glyma.01G199600.Wm82.a2.v1	2.56	2.85	0.71	3.58	4.24	4.3	2.92	4.15	1.67	3.23	2.59	4.56	0.63	2.63	1.26	4.65	3.64	2.71	2.52	2.66	3.91	3.49	2.21	3.55	11	16	2	11	14	20	16	37	10	12	10	6	2	18	14	26	20	20	26	19	10	15	19	8	Chr01
Glyma.01G199700.Wm82.a2.v1	143.29	124.34	82.05	5.03	13.23	38.76	31.01	39.78	45.85	15.24	28.68	9.77	158.19	103.38	131.63	42.31	27.59	71.17	56.09	41.73	69.46	13.19	17.65	20.52	239	271	90	6	17	70	66	138	107	22	43	5	196	275	568	92	59	204	225	116	69	22	59	18	Chr01
Glyma.01G199900.Wm82.a2.v1	20.94	20.24	18.43	33.89	21.46	25.44	13.82	31.26	23.63	15.28	9.81	17.95	28.18	40.76	33.22	27.04	22.35	26.29	27.95	17.19	12.95	17.63	11	16.76	19	24	11	22	15	25	16	59	30	12	8	5	19	59	78	32	26	41	61	26	7	16	20	8	Chr01
Glyma.01G200000.Wm82.a2.v1	20.6	20.88	16.93	24.91	27.47	38.56	34.03	28.91	44.17	22.52	22.92	23.58	12.74	17.46	18.72	43.13	24.32	27.21	25.47	27.06	26.18	20.04	23.06	22.24	37	49	20	32	38	75	78	108	111	35	37	13	17	50	87	101	56	84	110	81	28	36	83	21	Chr01
Glyma.01G200100.Wm82.a2.v1	0.28	0	0.42	0.78	0	0	4.36	0.4	3.38	8.36	2.78	9.06	0	0.17	0	1.28	0.22	0.81	2.31	1.67	1.4	8.9	4.3	8.46	1	0	1	2	0	0	20	3	17	26	9	10	0	1	0	6	1	5	20	10	3	32	31	16	Chr01
Glyma.01G200200.Wm82.a2.v1	3.01	1.92	4.58	1.4	0.33	0.23	0.79	1.21	1.61	1.16	0.28	0.82	3.04	1.73	2.72	0.58	0.2	0	0.52	0.3	0.84	0.5	0.75	0	12	10	12	4	1	1	4	10	9	4	1	1	9	11	28	3	1	0	5	2	2	2	6	0	Chr01
Glyma.01G200300.Wm82.a2.v1	0.71	3.78	0	0	0	0	0	0	0	0	0	0	0	0.89	0.55	0	0	0	0	0	0	0	0	0	1	7	0	0	0	0	0	0	0	0	0	0	0	2	2	0	0	0	0	0	0	0	0	0	Chr01
Glyma.01G200400.Wm82.a2.v1	0	0	0	0.66	0	0.44	0.74	1.82	0.68	0.55	1.05	0	0.64	0	0	0	1.11	0.83	0	0.28	0	0.47	0.47	0.9	0	0	0	1	0	1	2	8	2	1	2	0	1	0	0	0	3	3	0	1	0	1	2	1	Chr01
Glyma.01G200500.Wm82.a2.v1	1.29	0.99	1.96	0.45	1.26	0.6	0.25	0.31	0.23	1.49	0.72	2.1	2.17	1.42	2.12	2.47	0.75	0.56	1.74	0.19	1.62	0.32	0.8	0	4	4	4	1	3	2	1	2	1	4	2	2	5	7	17	10	3	3	13	1	3	1	5	0	Chr01
Glyma.01G200600.Wm82.a2.v1	0	0.64	0	2.32	4.32	0	0	1.2	0	0	0	0	0	0.52	0	0	1.3	0	0	0	0	0	0	0	0	1	0	2	4	0	0	3	0	0	0	0	0	1	0	0	2	0	0	0	0	0	0	0	Chr01
Glyma.01G200700.Wm82.a2.v1	14.23	19.9	8.95	15.09	20.38	24.91	8.07	15.8	10.17	7.94	10.37	9.59	13.87	17.23	15.55	13.17	22.19	19.69	15.7	13.84	11.53	7.36	3.43	12.13	29	53	12	22	32	55	21	67	29	14	19	6	21	56	82	35	58	69	77	47	14	15	14	13	Chr01
Glyma.01G200800.Wm82.a2.v1	12.21	13.12	16.98	15.25	13.48	20.14	6.31	16.23	10.02	5.7	4.33	6.77	12.58	14	16.36	20.91	20.86	16.02	14.79	16.05	16.57	6.75	5.44	11.85	47	66	43	42	40	84	31	130	54	19	15	8	36	86	163	105	103	106	137	103	38	26	42	24	Chr01
Glyma.01G200900.Wm82.a2.v1	2.94	3.54	5.11	7.05	7.63	2.72	1.65	3.43	2.1	1.94	1.4	2.74	5.09	2.63	4.38	3.87	6.55	4.64	4.19	4.03	4.94	4.62	2.31	3.2	7	11	8	12	14	7	5	17	7	4	3	2	9	10	27	12	20	19	24	16	7	11	11	4	Chr01
Glyma.01G201000.Wm82.a2.v1	115.58	117.51	78.65	66.66	73.45	97.02	27.23	84.32	28.88	17.75	19.78	31.6	99.01	67.4	78.41	46.49	58.63	52.2	38.64	26.67	24.43	9.7	11.7	10.76	143	190	64	59	70	130	43	217	50	19	22	12	91	133	251	75	93	111	115	55	18	12	29	7	Chr01
Glyma.01G201100.Wm82.a2.v1	31.88	19.2	27.84	18.02	17.61	18.79	13.29	10.11	14.06	7.84	8.3	8.84	30.13	16.59	30.67	17.17	21.16	12.63	12.69	10.17	13.67	8.14	7.45	6.45	47	37	27	19	20	30	25	31	29	10	11	4	33	39	117	33	40	32	45	25	12	12	22	5	Chr01
Glyma.01G202000.Wm82.a2.v1	10.79	7.88	8.95	15.09	12.1	8.15	3.84	9.91	3.86	2.83	0	0	9.25	16.3	14.03	5.27	12.24	11.13	5.91	5.3	1.65	2.45	1.47	3.73	22	21	12	22	19	18	10	42	11	5	0	0	14	53	74	14	32	39	29	18	2	5	6	4	Chr01
Glyma.01G202200.Wm82.a2.v1	0	0	0	0	0	0	0	0	0	0	0	0	0	0	0.28	0	0.56	0	0	0.22	0	0	0.18	0	0	0	0	0	0	0	0	0	0	0	0	0	0	0	2	0	2	0	0	1	0	0	1	0	Chr01
Glyma.01G202400.Wm82.a2.v1	1.39	0.53	0	1.94	1.8	1.92	1.09	3.33	2.48	0	0.77	0	7.47	6.09	4.83	1.6	4.33	0.81	2.31	1.25	2.33	0.69	0.69	0	2	1	0	2	2	3	2	10	5	0	1	0	8	14	18	3	8	2	8	3	2	1	2	0	Chr01
Glyma.01G202500.Wm82.a2.v1	126.6	100.51	402.49	299.07	204.78	215.06	184.09	234.67	196.93	183.06	161.15	149.97	123.03	126.93	150.46	146.94	191.16	206.8	247.14	198.25	169.37	295.78	181.42	184.11	187	194	391	316	233	344	347	721	407	234	214	68	135	299	575	283	362	525	878	488	149	437	537	143	Chr01
Glyma.01G202600.Wm82.a2.v1	6.91	6.94	7.01	12.46	7.58	8.37	5.66	7.83	6.04	3.02	2.73	2.5	7.65	7.71	6.06	8.49	9.35	8.85	6.39	6.73	5.16	4.61	4.83	2.34	45	59	30	58	38	59	47	106	55	17	16	5	37	80	102	72	78	99	100	73	20	30	63	8	Chr01
Glyma.01G202700.Wm82.a2.v1	0.34	1.05	1.57	1.44	1.34	0.32	2.7	2.48	1.97	1.19	1.91	2.24	0	0	0.13	2.64	1.07	1	2.15	0.83	2.31	4.47	3.78	3.93	1	4	3	3	3	1	10	15	8	3	5	2	0	0	1	10	4	5	15	4	4	13	22	6	Chr01
Glyma.01G202900.Wm82.a2.v1	0	0	0	0	0	0	0	0	0	0	0	0	0	0	0	0	0	0.32	0.46	0	0	0	0	0	0	0	0	0	0	0	0	0	0	0	0	0	0	0	0	0	0	1	2	0	0	0	0	0	Chr01
Glyma.01G203000.Wm82.a2.v1	1.19	0.91	1.6	0.37	1.37	1.09	1.55	1.2	1.32	0.61	0.73	0.86	1.95	2.31	1.83	1.11	0.41	1.84	1.86	1.5	2.43	1.45	0.92	1	9	9	8	2	8	9	15	19	14	4	5	2	11	28	36	11	4	24	34	19	11	11	14	4	Chr01
Glyma.01G203100.Wm82.a2.v1	2.05	1.41	4.05	4.29	1.59	1.32	0.16	1.67	1.17	0	0.91	0	1.93	1.54	1.42	2.04	2.23	1.19	0.26	0.61	1.72	1.43	1.02	1.17	10	9	13	15	6	7	1	17	8	0	4	0	7	12	18	13	14	10	3	5	5	7	10	3	Chr01
Glyma.01G203200.Wm82.a2.v1	11.96	16.39	0.76	21.59	24.58	11.96	1.95	16.29	1.07	0	0	0	21.46	27.8	15.6	14.52	18.26	10.73	4.35	1.79	2.51	0	1.24	0	24	43	1	31	38	26	5	68	3	0	0	0	32	89	81	38	47	37	21	6	3	0	5	0	Chr01
Glyma.01G203300.Wm82.a2.v1	3.73	1.82	2.58	6.17	4.85	5.64	4.79	4.73	4.37	3.14	3.4	3.32	4.57	2.55	1.44	3.12	2.91	1.78	3.67	4.68	1.71	4.07	3.73	2.58	11	7	5	13	11	18	18	29	18	8	9	3	10	12	11	12	11	9	26	23	3	12	22	4	Chr01
Glyma.01G203400.Wm82.a2.v1	1.8	3.03	4.92	4.02	2.8	0.33	0	1.04	0.26	0.42	0	2.34	1.94	0.9	3.34	2.48	1.68	2.72	0.75	0.22	0.6	0.72	0.18	0	5	11	9	8	6	1	0	6	1	1	0	2	4	4	24	9	6	13	5	1	1	2	1	0	Chr01
Glyma.01G203500.Wm82.a2.v1	0	0	0	1.77	1.1	0.39	0.66	0.61	0.3	0	0.47	0	0.57	0.79	0.65	0	0.33	0.49	0.7	0.51	0	0	0	0	0	0	0	3	2	1	2	3	1	0	1	0	1	3	4	0	1	2	4	2	0	0	0	0	Chr01
Glyma.01G203600.Wm82.a2.v1	129.5	197.31	99.34	215.3	251.43	258.57	149.94	208.1	212.63	126.73	119.39	190.05	168.05	132.41	100.57	358.83	256.63	251.18	207.62	212.83	333.03	178.47	225.32	181.94	111	221	56	132	166	240	164	371	255	94	92	50	107	181	223	401	282	370	428	304	170	153	387	82	Chr01
Glyma.01G203700.Wm82.a2.v1	3.07	7.05	9.34	7.51	3.99	2.13	4.21	1.85	3.84	0	0.85	0	6.2	3.85	6.23	5.89	9.58	2.68	4.15	4.61	0	0	1.92	2.92	4	12	8	7	4	3	7	5	7	0	1	0	6	8	21	10	16	6	13	10	0	0	5	2	Chr01
Glyma.01G203800.Wm82.a2.v1	34.02	35.7	59.12	45.52	40.38	26.03	26.66	34.11	37.17	10.11	16.76	30.08	34.67	38.09	37.01	38.02	36.77	40.44	27.48	29.45	26.11	19.92	18.19	20.33	70	96	80	67	64	58	70	146	107	18	31	19	53	125	197	102	97	143	136	101	32	41	75	22	Chr01
Glyma.01G204000.Wm82.a2.v1	9.55	8.71	10.05	10.27	15.74	17.98	7.48	16.25	8.14	5.94	5.72	3.59	9.39	11.98	9.09	16.06	15.47	13.89	10.54	11.02	14.18	7.34	5.68	6.29	26	31	18	20	33	53	26	92	31	14	14	3	19	52	64	57	54	65	69	50	23	20	31	9	Chr01
Glyma.01G204200.Wm82.a2.v1	36.49	39.23	24.58	7.1	8.99	4.69	7.24	4.44	3.96	4.8	2.05	6.02	48.49	53.86	48.73	4.96	3.24	1.61	6.72	3.6	7.75	6.46	7.61	11.42	79	111	35	11	15	11	20	20	12	9	4	4	78	186	273	14	9	6	35	13	10	14	33	13	Chr01
Glyma.01G204300.Wm82.a2.v1	7.14	5.12	4.07	4.99	4.63	8.24	3.85	6.43	3.19	1.03	1.98	1.45	9.61	10.07	10.17	4.45	7.66	5.97	4.27	4.82	5.24	2.68	3.34	0.85	16	15	6	8	8	20	11	30	10	2	4	1	16	36	59	13	22	23	23	18	7	6	15	1	Chr01
Glyma.01G204400.Wm82.a2.v1	3.73	1.79	1.42	0.65	0	0	0	0.22	0	0	0	0	10.06	0.59	8.66	0	0	0.27	0	0	0	0	0	0	8	5	2	1	0	0	0	1	0	0	0	0	16	2	48	0	0	1	0	0	0	0	0	0	Chr01
Glyma.01G204600.Wm82.a2.v1	9.91	6.21	1.37	18.89	26.9	27.87	29.65	56.1	56.02	22.39	19.04	39.63	12.13	9.6	5.22	63.23	47.44	56.62	85.22	73.53	90.77	49.09	62.5	60.83	22	18	2	30	46	67	84	259	174	43	38	27	20	34	30	183	135	216	455	272	120	109	278	71	Chr01
Glyma.01G204700.Wm82.a2.v1	0	0.63	0	5.77	6.43	0.76	6.47	3.57	7.67	3.82	1.84	8.07	1.11	0.52	0.64	6.33	4.51	4.8	8.58	4.46	9.7	2.48	2.88	3.14	0	1	0	5	6	1	10	9	13	4	2	3	1	1	2	10	7	10	25	9	7	3	7	2	Chr01
Glyma.01G204800.Wm82.a2.v1	0	0	0	5.19	0	0	0	0	0	0	0	0	0	0.39	0	0	0	0	0.77	0	0	0	0	0	0	0	0	6	0	0	0	0	0	0	0	0	0	1	0	0	0	0	3	0	0	0	0	0	Chr01
Glyma.01G204900.Wm82.a2.v1	0.94	1.58	2.86	2.89	1.46	2.43	1.77	1.99	2.15	1.09	0.63	1.22	1.52	2.24	1.31	2.59	2.2	1.86	1.8	1.01	0.95	0.94	0.66	2.14	5	11	10	11	6	14	12	22	16	5	3	2	6	19	18	18	15	17	23	9	3	5	7	6	Chr01
Glyma.01G205100.Wm82.a2.v1	0.27	0	3.33	2.3	2.49	1.26	0.86	1.45	1.56	1.58	0.3	2.67	2.21	1.89	1.37	2.73	2.56	3.18	2.62	2.3	0.92	3.28	1.37	4.68	1	0	8	6	7	5	4	11	8	5	1	3	6	11	13	13	12	20	23	14	2	12	10	9	Chr01
Glyma.01G205200.Wm82.a2.v1	29.29	27.15	6.85	32.28	26.32	32.77	21.19	38.99	15.7	23.43	26.94	20.18	21.23	26.49	30.48	14.69	16.69	32.44	27.4	36.5	25.53	27.59	23.89	18.21	52	63	8	41	36	63	48	144	39	36	43	11	28	75	140	34	38	99	117	108	27	49	85	17	Chr01
Glyma.01G205300.Wm82.a2.v1	1.4	0	1.06	1.96	0.91	4.53	0.55	0.67	3	0.81	2.34	0	0	0	0	6.44	2.73	3.26	2.62	1.68	2.35	0	1.05	1.33	2	0	1	2	1	7	1	2	6	1	3	0	0	0	0	12	5	8	9	4	2	0	3	1	Chr01
Glyma.01G205400.Wm82.a2.v1	85.42	82.42	50.82	34.27	30.86	53.5	43.66	49.64	60.52	60.08	39.66	45.98	80.99	51.23	67.76	80.33	74.74	54.02	51.57	38.33	59.86	37.13	45.22	59.33	115	145	45	33	32	78	75	139	114	70	48	19	81	110	236	141	129	125	167	86	48	50	122	42	Chr01
Glyma.01G205500.Wm82.a2.v1	1.51	4.62	1.15	0	0	0	0	1.09	0	0	0	0	2.03	2.37	4.38	0	0.59	0	0	0.45	0	0	0.38	0	2	8	1	0	0	0	0	3	0	0	0	0	2	5	15	0	1	0	0	1	0	0	1	0	Chr01
Glyma.01G205600.Wm82.a2.v1	2.51	3.52	5.72	6.42	2.17	4.24	4.58	3.01	2.99	1.93	2.79	0	1.69	2.36	1.78	2.56	2.61	2.43	1.74	1.5	2.81	1.67	1.46	3.18	6	11	9	11	4	11	14	15	10	4	6	0	3	9	11	8	8	10	10	6	4	4	7	4	Chr01
Glyma.01G205700.Wm82.a2.v1	6.36	4.22	9.03	1.78	1.65	2.74	2.99	3.06	3.94	4.41	4.72	4.15	5.14	3.72	10.33	3.25	1.65	4.2	1.76	2.29	3.56	2.12	1.48	2.42	15	13	14	3	3	7	9	15	13	9	10	3	9	14	63	10	5	17	10	9	5	5	7	3	Chr01
Glyma.01G205800.Wm82.a2.v1	9.77	16.32	31.07	38.5	26.53	13.13	9.05	14.52	9.52	5.13	8.89	11.58	16.74	8.91	19.23	20.44	20.1	10.86	15.15	14.39	14.92	6.22	6.65	10.14	11	24	23	31	23	16	13	34	15	5	9	4	14	16	56	30	29	21	41	27	10	7	15	6	Chr01
Glyma.01G205900.Wm82.a2.v1	4.33	2.98	0.66	0	0.56	0.8	0.34	0.42	0.31	1	0.48	0	4.08	1.63	2.18	1	1.01	0.76	0.18	0.52	0	0	0.43	0	10	9	1	0	1	2	1	2	1	2	1	0	7	6	13	3	3	3	1	2	0	0	2	0	Chr01
Glyma.01G206000.Wm82.a2.v1	3.57	4.1	5.43	3.33	1.93	1.37	1.63	3.44	2.13	3.1	1.66	1.94	2	4.67	3.57	4.57	4.64	3.46	2.97	1.61	0.5	0.89	2.08	1.7	12	18	12	8	5	5	7	24	10	9	5	2	5	25	31	20	20	20	24	9	1	3	14	3	Chr01
Glyma.01G206100.Wm82.a2.v1	2.91	2.97	0	5.42	1.89	3.58	0.76	3.26	0.69	0	0.54	1.58	1.3	2.13	0.75	8.54	7.93	1.69	0.81	0.87	0	0	0.24	0	6	8	0	8	3	8	2	14	2	0	1	1	2	7	4	23	21	6	4	3	0	0	1	0	Chr01
Glyma.01G206200.Wm82.a2.v1	18.61	13.23	21.23	25.09	21.57	27.01	26.05	25.89	21.85	13.83	22.92	19.49	16.11	16.67	17.73	21.41	26.96	33.65	22.11	20.74	22.32	20.6	18.91	21.49	28	26	21	27	25	44	50	81	46	18	31	9	18	40	69	42	52	87	80	52	20	31	57	17	Chr01
Glyma.01G206400.Wm82.a2.v1	0	0	0	0.3	0	0.2	0	0.1	0	0	0	0	0	0.4	0	0.16	0	0.12	0	0	0	0	0	0	0	0	0	1	0	1	0	1	0	0	0	0	0	3	0	1	0	1	0	0	0	0	0	0	Chr01
Glyma.01G206500.Wm82.a2.v1	5.46	7.56	5.53	3.63	1.69	0.72	0.41	1	0	0	0	0	6.65	5.87	6.83	1.2	1.01	0.3	0.32	0.78	0	0	0	0	21	38	14	10	5	3	2	8	0	0	0	0	19	36	68	6	5	2	3	5	0	0	0	0	Chr01
Glyma.01G206600.Wm82.a2.v1	0.97	0.37	2.21	0	0	0	0.38	0.23	0	0	0	0	3.25	0.61	0.75	0.37	0	0	0	0	0	0	0	0	2	1	3	0	0	0	1	1	0	0	0	0	5	2	4	1	0	0	0	0	0	0	0	0	Chr01
Glyma.01G206900.Wm82.a2.v1	0	0	0	0.32	0	0	0	0	0	0.26	0	0	0	0	0	0	0	0	0	0	0	0	0	0	0	0	0	1	0	0	0	0	0	1	0	0	0	0	0	0	0	0	0	0	0	0	0	0	Chr01
Glyma.01G207000.Wm82.a2.v1	9.53	9.32	14.49	8.14	11.69	6.85	7.88	4.58	5.68	7.95	4.12	8.62	12.83	10.96	10.44	11.78	5.78	4.93	7.26	3.18	5.33	4.23	2.38	7.05	18	23	18	11	17	14	19	18	15	13	7	5	18	33	51	29	14	16	33	10	6	8	9	7	Chr01
Glyma.01G207100.Wm82.a2.v1	0	0.29	0.58	3.19	0	0.35	0	0	0	0	0	0	0	0.24	0.15	0	0	0	0	0	0	0	0	0	0	1	1	6	0	1	0	0	0	0	0	0	0	1	1	0	0	0	0	0	0	0	0	0	Chr01
Glyma.01G207200.Wm82.a2.v1	10.37	8.69	15.02	6.21	9.62	6.38	2.71	4.99	5.29	1.14	1.65	1.61	13.3	7.74	10.88	4.17	4.62	4.31	4.72	3.56	3.32	2.47	1.73	3.76	21	23	20	9	15	14	7	21	15	2	3	1	20	25	57	11	12	15	23	12	4	5	7	4	Chr01
Glyma.01G207300.Wm82.a2.v1	5.76	16.3	2.63	3.22	11.21	8.5	18.04	13.84	19.75	18.62	23.05	30	16.27	4.69	2.45	7.95	6.73	13.06	15.79	20.38	23.19	31.07	28.44	32.84	10	37	3	4	15	16	40	50	48	28	36	16	21	13	11	18	15	39	66	59	24	54	99	30	Chr01
Glyma.01G207400.Wm82.a2.v1	3.66	4.28	1.96	4.82	3.35	4.77	2.53	4.14	1.69	1	1.68	3.51	2.61	2.97	3.49	4.95	5.37	4.26	2.33	3.36	2.89	1.08	1.72	3.28	17	26	6	16	12	24	15	40	11	4	7	5	9	22	42	30	32	34	26	26	8	5	16	8	Chr01
Glyma.01G207500.Wm82.a2.v1	11.64	9.14	5.59	9.42	10.34	11.6	4.32	8.1	6.35	3.19	4.09	3.99	16.08	8.45	9.35	11.51	12.42	14.08	10.06	6.25	4.63	2.45	6.57	2.91	38	39	12	22	26	41	18	55	29	9	12	4	39	44	79	49	52	79	79	34	9	8	43	5	Chr01
Glyma.01G207600.Wm82.a2.v1	0	0	0	0	0	0	0	0	0	0	0	0	0	0	0	0	0	0	0	0	0	0	0.5	0	0	0	0	0	0	0	0	0	0	0	0	0	0	0	0	0	0	0	0	0	0	0	1	0	Chr01
Glyma.01G207700.Wm82.a2.v1	148.26	162.54	47.35	151.39	172.56	269.96	158.07	195.51	98.65	106.88	160.78	25.74	90.09	155.33	106.71	95.89	168.57	179.56	135.85	137.21	91.3	53.9	83.03	54.8	319	457	67	233	286	629	434	875	297	199	311	17	144	533	594	269	465	664	703	492	117	116	358	62	Chr01
Glyma.01G207800.Wm82.a2.v1	5.56	2.95	1.3	5.38	5	6.72	3.02	5.55	3.06	3.96	4.76	4.18	8.06	5.37	4.96	3.94	3	7.47	4.09	4.11	2.16	4.71	3.2	3.26	13	9	2	9	9	17	9	27	10	8	10	3	14	20	30	12	9	30	23	16	3	11	15	4	Chr01
Glyma.01G207900.Wm82.a2.v1	2.63	1.21	8.81	1.47	2.05	0	0	1.27	0.38	0	0	0	2.13	3.3	2.24	0.4	0.41	0.31	0.88	0.63	0	0	0.79	0	5	3	11	2	3	0	0	5	1	0	0	0	3	10	11	1	1	1	4	2	0	0	3	0	Chr01
Glyma.01G208000.Wm82.a2.v1	0	0	0	0	0	0	0	0	0	0	0	0	0.84	0	0	0	0	0	0	0	0	0	0	0	0	0	0	0	0	0	0	0	0	0	0	0	1	0	0	0	0	0	0	0	0	0	0	0	Chr01
Glyma.01G208100.Wm82.a2.v1	5.67	6.5	3.45	6.6	7.35	10.11	6.96	6.36	6.88	3.49	3.36	3.69	3.56	4.5	5.77	6.37	6.48	6.81	5.5	6.57	3.17	2.64	3.96	4.31	30	45	12	25	30	58	47	70	51	16	16	6	14	38	79	44	44	62	70	58	10	14	42	12	Chr01
Glyma.01G208200.Wm82.a2.v1	130.28	59.73	99.46	19.98	11.42	12.69	0.86	3.96	4.32	0	0	0	131.72	59.29	196.12	8.01	16.72	6.08	3.89	1.98	4.61	0	1.92	0	237	142	119	26	16	25	2	15	11	0	0	0	178	172	923	19	39	19	17	6	5	0	7	0	Chr01
Glyma.01G208300.Wm82.a2.v1	1.09	2.5	0	4.94	2.82	4.77	1.28	2.75	0.19	0.94	0.6	0	2.2	2.22	1.89	3.34	2.76	3.01	1.36	1.14	0	0.54	0.27	1.03	4	12	0	13	8	19	6	21	1	3	2	0	6	13	18	16	13	19	12	7	0	2	2	2	Chr01
Glyma.01G208400.Wm82.a2.v1	30.21	18.23	16.79	41.43	32.44	31.66	25.5	21.23	27.82	12.76	17.45	9.46	17.99	24.77	23.13	19.16	24.02	16.23	16.43	14.64	16.59	16.85	17.11	20.99	52	41	19	51	43	59	56	76	67	19	27	5	23	68	103	43	53	48	68	42	17	29	59	19	Chr01
Glyma.01G208700.Wm82.a2.v1	6.5	6.29	8.33	11.48	10.66	6.32	9.12	7.08	4.4	5.14	3.81	11.15	5.53	6.87	7.94	9.45	9.88	9.96	7.97	7.8	8.05	6.16	8.03	5.21	19	24	16	24	24	20	34	43	18	13	10	10	12	32	60	36	37	50	56	38	14	18	47	8	Chr01
Glyma.01G209000.Wm82.a2.v1	0	0	0	0	0.96	0	0	0.18	0.26	0	0	0	0	0	0	0.57	0	0.22	0	0.22	0	0	0	0	0	0	0	0	2	0	0	1	1	0	0	0	0	0	0	2	0	1	0	1	0	0	0	0	Chr01
Glyma.01G209100.Wm82.a2.v1	0.96	1.1	0.73	3.35	5.6	1.77	1.88	1.84	0.34	0	0.53	0	3.87	1.5	1.3	1.47	2.99	2.51	0.4	0.86	1.61	0.96	0.96	0	2	3	1	5	9	4	5	8	1	0	1	0	6	5	7	4	8	9	2	3	2	2	4	0	Chr01
Glyma.01G209200.Wm82.a2.v1	5.2	5.48	2.99	4.71	3.47	2.98	3.19	4.12	1.91	2.44	1.09	2.29	6.43	6.96	6.79	3.45	3.51	4.01	3.91	2.7	3.54	1.83	2.38	2.14	37	51	14	24	19	23	29	61	19	15	7	5	34	79	125	32	32	49	67	32	15	13	34	8	Chr01
Glyma.01G209300.Wm82.a2.v1	3.07	1.92	2.54	1.56	3.44	2.58	1.86	2.61	2.19	1.13	1.09	0.45	3	3.15	2.21	3.85	2.83	2.52	2.2	2.26	1.17	1.67	1.88	0.8	22	18	12	8	19	20	17	39	22	7	7	1	16	36	41	36	26	31	38	27	5	12	27	3	Chr01
Glyma.01G209500.Wm82.a2.v1	1.02	4.28	0	6.4	29.05	53.07	2.39	13.94	5.09	0	1.7	1.66	6.16	2.55	1.77	37.45	64.26	21.31	9.3	5.19	7.69	0	0.25	0	2	11	0	9	44	113	6	57	14	0	3	1	9	8	9	96	162	72	44	17	9	0	1	0	Chr01
Glyma.01G209700.Wm82.a2.v1	20.78	18.63	4.51	7.47	8.48	8.22	5.58	12.85	3.39	0.69	0	0	13.59	13.77	11.7	13.21	9.26	20.38	13.58	9.98	1	0	0.3	0	35	41	5	9	11	15	12	45	8	1	0	0	17	37	51	29	20	59	55	28	1	0	1	0	Chr01
Glyma.01G209800.Wm82.a2.v1	7.87	5.54	6.7	15.84	10.22	6.69	6.41	5.6	4.5	4	4.55	3.08	6.36	5.33	5.72	3.86	7.86	7.33	4.32	5.48	3.17	4.09	3.46	4.19	25	23	14	36	25	23	26	37	20	11	13	3	15	27	47	16	32	40	33	29	6	13	22	7	Chr01
Glyma.01G209900.Wm82.a2.v1	0.4	1.23	0.61	1.12	1.04	0.37	0	1.35	0.57	0	0	0	1.08	0.5	0.47	0.31	0	0.7	0.67	0.48	1.35	0.4	0.2	0.76	1	4	1	2	2	1	0	7	2	0	0	0	2	2	3	1	0	3	4	2	2	1	1	1	Chr01
Glyma.01G210100.Wm82.a2.v1	0.5	0.38	0.76	0	0	2.31	3.53	2.64	1.79	2.31	3.34	3.26	0	0	0.19	0.77	1.17	1.16	4.16	2.4	4.2	1	2.25	5.7	1	1	1	0	0	5	9	11	5	4	6	2	0	0	1	2	3	4	20	8	5	2	9	6	Chr01
Glyma.01G210200.Wm82.a2.v1	19.06	8.62	27.67	50.87	22.5	22.4	8.83	22.91	13.62	11.01	4.82	8.47	20.99	11.41	16.74	27.25	23.65	12.1	12.61	10.4	14.55	5.2	6.49	8.24	22	13	21	42	20	28	13	55	22	11	5	3	18	21	50	41	35	24	35	20	10	6	15	5	Chr01
Glyma.01G210400.Wm82.a2.v1	0	0	0.64	0.59	0	0	0	0	0	0	0	0	0.57	0.27	0.16	0	0.66	0	0	0	0	0	0	0	0	0	1	1	0	0	0	0	0	0	0	0	1	1	1	0	2	0	0	0	0	0	0	0	Chr01
Glyma.01G210500.Wm82.a2.v1	0	0	0	0	0	0	0	0	0	0	0	0	0	0	0	0.27	0	0	0	0	0	0	0	0	0	0	0	0	0	0	0	0	0	0	0	0	0	0	0	1	0	0	0	0	0	0	0	0	Chr01
Glyma.01G210600.Wm82.a2.v1	10.76	11.34	4.63	12.77	7.38	7.87	3.02	8.88	3.77	0.7	1.13	1.98	7.38	10.44	6.91	8.56	9.5	7.8	5.74	4.02	3.75	1.42	2.23	1.16	53	73	15	45	28	42	19	91	26	3	5	3	27	82	88	55	60	66	68	33	11	7	22	3	Chr01
Glyma.01G210700.Wm82.a2.v1	0.65	0.5	0	0.91	0.84	1.8	0.51	1.56	0	0	0.72	0	0	0.41	0	2.49	2.54	2.65	2.16	1.56	1.09	0	0.32	0	1	1	0	1	1	3	1	5	0	0	1	0	0	1	0	5	5	7	8	4	1	0	1	0	Chr01
Glyma.01G210800.Wm82.a2.v1	3.98	17.77	3.03	12.99	20.67	12.87	2.6	7.66	3.79	0	5.9	4.32	8.93	9.99	6.92	9.67	8.28	6.18	3.59	1.99	2.23	3.32	2.32	1.26	6	35	3	14	24	21	5	24	8	0	8	2	10	24	27	19	16	16	13	5	2	5	7	1	Chr01
Glyma.01G211000.Wm82.a2.v1	0.59	0.23	0	0	0	0	0	0	0	0	0	0	1.2	0.37	0.8	0	0	0	0	0	0	0	0	0	2	1	0	0	0	0	0	0	0	0	0	0	3	2	7	0	0	0	0	0	0	0	0	0	Chr01
Glyma.01G211200.Wm82.a2.v1	13.47	14.99	20.95	16.69	19.87	16.96	23.03	16.49	12.69	21.23	14.98	19.95	18.13	22.84	17.4	19.96	20.3	24.05	16.42	18	19.02	18.98	21.24	20.38	44	64	45	39	50	60	96	112	58	60	44	20	44	119	147	85	85	135	129	98	37	62	139	35	Chr01
Glyma.01G211300.Wm82.a2.v1	13.48	4.64	48.16	65	12.25	8.09	0	5.18	1.93	0.78	0.75	6.59	10.89	11.41	23.44	4.65	3.68	1.96	2.52	1.62	1.13	5.39	4.04	0	20	9	47	69	14	13	0	16	4	1	1	3	12	27	90	9	7	5	9	4	1	8	12	0	Chr01
Glyma.01G211500.Wm82.a2.v1	3.67	1.4	17.44	1.28	2.38	0.42	2.52	1.98	0.66	2.12	3.06	1.49	0.62	3.74	8.16	1.06	0.36	1.6	2.1	1.93	2.31	2.29	0.92	0.87	8	4	25	2	4	1	7	9	2	4	6	1	1	13	46	3	1	6	11	7	3	5	4	1	Chr01
Glyma.01G211700.Wm82.a2.v1	89.75	84.3	103.95	62.51	74.87	66.12	45.96	73.52	53.49	28.83	36.04	63.33	126.92	101.17	98.31	113.32	98.31	81.25	62.51	42.38	78.34	43.73	53.36	38.82	277	340	211	138	178	221	181	472	231	77	100	60	291	498	785	456	389	431	464	218	144	135	330	63	Chr01
Glyma.01G211800.Wm82.a2.v1	0	0	0	0	0.58	0	0	0	0	0	0	0	0.6	0.84	0	0	0	0	0	0	0	0	0	0	0	0	0	0	1	0	0	0	0	0	0	0	1	3	0	0	0	0	0	0	0	0	0	0	Chr01
Glyma.01G211900.Wm82.a2.v1	4.21	4.83	2	1.47	2.73	1.7	1.44	1.52	0	0.61	0.88	0	5.66	4.12	3.96	0.81	1.03	1.07	0.55	0.63	0.44	0.79	0.26	0.5	16	24	5	4	8	7	7	12	0	2	3	0	16	25	39	4	5	7	5	4	1	3	2	1	Chr01
Glyma.01G212000.Wm82.a2.v1	6.04	6.93	6.89	16.89	15.68	12.9	19.52	12.16	11.6	28.36	25.19	45.5	2.03	0.71	0.73	2.32	2.36	2.64	2.98	4.76	17.75	18.12	13	9.33	16	24	12	32	32	37	66	67	43	65	60	37	4	3	5	8	8	12	19	21	28	48	69	13	Chr01
Glyma.01G212100.Wm82.a2.v1	0	0.44	0	0	1.48	0	0	0	0	0	0.64	0	3.84	0.36	0.22	0	0	0	0.24	0	0	0	0.28	0	0	1	0	0	2	0	0	0	0	0	1	0	5	1	1	0	0	0	1	0	0	0	1	0	Chr01
Glyma.01G212200.Wm82.a2.v1	2.21	2.07	2.24	3.78	1.28	1.59	0.96	0.95	0.88	0.85	0.82	0	1.99	2.47	1.23	1.51	0.77	0.86	1.23	2.21	0.83	0.74	1.59	2.34	9	11	6	11	4	7	5	8	5	3	3	0	6	16	13	8	4	6	12	15	2	3	13	5	Chr01
Glyma.01G212400.Wm82.a2.v1	4.24	3.24	0	0.62	0.58	1.03	0.17	0.64	0.48	0	0.25	0	4.21	7.14	3.54	0.86	0.7	1.04	0.28	0.27	0	0	0.11	0.42	19	19	0	2	2	5	1	6	3	0	1	0	14	51	41	5	4	8	3	2	0	0	1	1	Chr01
Glyma.01G212500.Wm82.a2.v1	4.72	2.58	1.03	2.83	2.63	1.25	0.53	3.24	0.96	0	1.5	0	3.63	3.81	2.87	1.03	1.05	1.96	0.84	1.62	3.4	1.35	0.34	1.28	7	5	1	3	3	2	1	10	2	0	2	0	4	9	11	2	2	5	3	4	3	2	1	1	Chr01
Glyma.01G212600.Wm82.a2.v1	1.9	2.91	0	0	0	1.76	0	3.2	1.36	3.3	1.06	0	1.28	1.79	0.73	5.1	2.97	3.32	4.74	3.99	3.19	0	0.47	0	2	4	0	0	0	2	0	7	2	3	1	0	1	3	2	7	4	6	12	7	2	0	1	0	Chr01
Glyma.01G212700.Wm82.a2.v1	0	0.53	8.36	2.88	1.78	8.25	5.38	3.96	8.35	7.15	3.06	0	3.7	0	1.86	5.27	3.22	4.8	5.14	5.36	3.46	2.06	3.09	0	0	1	8	3	2	13	10	12	17	9	4	0	4	0	7	10	6	12	18	13	3	3	9	0	Chr01
Glyma.01G212800.Wm82.a2.v1	2.99	2.8	1.01	1.39	1.29	1.84	0.78	1.92	0.71	0.38	1.11	2.17	3.58	6.04	4.88	1.53	1.3	1.74	2.21	3.79	0	2.99	1.66	0.63	9	11	2	3	3	6	3	12	3	1	3	2	8	29	38	6	5	9	16	19	0	9	10	1	Chr01
Glyma.01G212900.Wm82.a2.v1	8.76	11.18	7.77	11.23	18.01	13.49	5.72	20.01	6.78	1.69	1.62	0	9.83	14.19	7.9	8.4	14.81	14.45	11.54	8.33	8.58	2.92	5.83	1.39	12	20	7	11	19	20	10	57	13	2	2	0	10	31	28	15	26	34	38	19	7	4	16	1	Chr01
Glyma.01G213000.Wm82.a2.v1	0	0.63	6.29	0.58	7.52	3.44	1.95	2.98	2.37	3.35	2.76	0	0	0.26	1.44	3.17	3.23	2.17	1.89	1.74	2.08	2.07	3.1	0.79	0	2	10	1	14	9	6	15	8	7	6	0	0	1	9	10	10	9	11	7	3	5	15	1	Chr01
Glyma.01G213100.Wm82.a2.v1	0	0	0	0.59	0	0	0	0	0	0	0	0	0	0	0	0.32	0	0.24	0	0.25	0	0.42	0.21	0	0	0	0	1	0	0	0	0	0	0	0	0	0	0	0	1	0	1	0	1	0	1	1	0	Chr01
Glyma.01G213200.Wm82.a2.v1	8.07	9.75	5.49	3.56	3.58	7.26	4.49	6.74	4.55	1.23	2.6	2.77	8.86	6.52	9.36	3.42	4.31	5.93	3.71	5.86	2.14	2.55	3.18	2.42	38	60	17	12	13	37	27	66	30	5	11	4	31	49	114	21	26	48	42	46	6	12	30	6	Chr01
Glyma.01G213300.Wm82.a2.v1	11.42	13.4	9.26	8.51	6.92	7.03	4.77	3.66	5.44	4.4	1.69	4.96	4.1	11.46	4.12	1.75	1.19	3.54	4.43	2.28	0	0.76	0.38	0	15	23	8	8	7	10	8	10	10	5	2	2	4	24	14	3	2	8	14	5	0	1	1	0	Chr01
Glyma.01G213400.Wm82.a2.v1	13.23	11.43	3.24	16.7	13.85	15.37	2.67	12.1	6.71	2.47	1.9	4.17	16.66	11.77	14.02	12.11	14.31	11.67	8.34	5.63	6.45	2.56	2.56	4.87	31	35	5	28	25	39	8	59	22	5	4	3	29	44	85	37	43	47	47	22	9	6	12	6	Chr01
Glyma.01G213500.Wm82.a2.v1	3.74	3.93	5.68	8.49	11.52	5.61	6.59	5.84	3.34	4.32	3.64	9.13	1.89	2.05	2.17	4.66	1.82	1.36	3.88	1.96	0	1.87	1.4	4.44	8	11	8	13	19	13	18	26	10	8	7	6	3	7	12	13	5	5	20	7	0	4	6	5	Chr01
Glyma.01G213600.Wm82.a2.v1	2.57	2.67	0.28	3.08	2.62	1.7	0.86	2.21	1.05	1.27	0.82	0	4.2	2.88	2.63	3.1	2.29	1.82	1.91	0.88	2.16	0.18	1.28	0.35	14	19	1	12	11	10	6	25	8	6	4	0	17	25	37	22	16	17	25	8	7	1	14	1	Chr01
Glyma.01G213700.Wm82.a2.v1	0	0.23	1.35	0	0	0.82	1.62	0.71	1.06	1.37	0	0.96	1.19	0.37	0.57	0.45	0.92	0.86	0.74	1.06	1.49	0.59	0.74	0.56	0	1	3	0	0	3	7	5	5	4	0	1	3	2	5	2	4	5	6	6	3	2	5	1	Chr01
Glyma.01G213800.Wm82.a2.v1	1	2.28	0.5	0.93	5.17	4.6	1.3	2.71	1.19	1.15	0.37	1.08	0.89	1.66	1.67	10.69	7.25	4.44	1.79	2.79	2.23	0	1.66	0	3	9	1	2	12	15	5	17	5	3	1	1	2	8	13	42	28	23	13	14	4	0	10	0	Chr01
Glyma.01G214100.Wm82.a2.v1	10.58	11.21	19.8	12.52	4.76	6.77	4.47	8.41	8.73	2.82	3.62	2.65	16.99	11.48	11.96	5.93	10.16	10.42	8.29	7.33	6.83	2.85	2.84	2.32	26	36	32	22	9	18	14	43	30	6	8	2	31	45	76	19	32	44	49	30	10	7	14	3	Chr01
Glyma.01G214200.Wm82.a2.v1	43.92	25.53	1.69	231.61	182.6	221.79	28.32	184.16	28.61	1.93	2.47	1.81	24.7	26.15	15.47	194.01	227.23	212.21	146.32	66.39	37.34	2.22	12.76	11.63	79	60	2	298	253	432	65	689	72	3	4	1	33	75	72	455	524	656	633	199	40	4	46	11	Chr01
Glyma.01G214300.Wm82.a2.v1	4.21	1.43	12.09	3.27	3.64	12.53	7.7	10.12	14.71	15.13	8.84	13.71	7.56	1.47	3.98	19.37	8.76	21.77	21	16.84	14.92	11.22	14.7	14.23	9	4	17	5	6	29	21	45	44	28	17	9	12	5	22	54	24	80	108	60	19	24	63	16	Chr01
Glyma.01G214500.Wm82.a2.v1	0.76	3.77	5.19	6.36	5.91	1.05	1.19	3.83	1.35	0	0.42	0	1.53	2.38	2.78	2.33	5.62	2.65	1.89	1.82	1.91	0	0.19	0.72	2	13	9	12	12	3	4	21	5	0	1	0	3	10	19	8	19	12	12	8	3	0	1	1	Chr01
Glyma.01G214600.Wm82.a2.v1	4.48	1.29	3.4	8.61	1.45	3.62	0.44	2.42	1.6	0	0.62	1.82	0.75	1.4	2.16	0.86	2.18	3.58	1.4	0.67	0	1.68	0.56	0	8	3	4	11	2	7	1	9	4	0	1	1	1	4	10	2	5	11	6	2	0	3	2	0	Chr01
Glyma.01G214700.Wm82.a2.v1	2.46	3.96	4.87	3.1	5.12	3.41	3.28	3.55	3.35	0.57	0.55	2.41	5.31	4.48	4.57	3.97	5.76	4.73	3.79	3.84	3.72	2.96	1.23	2.81	10	21	13	9	16	15	17	30	19	2	2	3	16	29	48	21	30	33	37	26	9	12	10	6	Chr01
Glyma.01G214800.Wm82.a2.v1	8.95	6.85	16.7	6.82	2.64	12.02	6.06	12.32	5.52	7.05	7.69	5.3	11.5	10.46	15.57	13.73	7.93	9.7	9.98	10.5	6.83	10.17	6.29	6.96	22	22	27	12	5	32	19	63	19	15	17	4	21	41	99	44	25	41	59	43	10	25	31	9	Chr01
Glyma.01G215100.Wm82.a2.v1	0.65	1.33	0.33	0.61	0	0.2	0.17	0.31	0.31	0	0.24	0	0.29	0.55	0.93	0.5	0.17	0.25	0	0.13	0	0	0.22	0.83	3	8	1	2	0	1	1	3	2	0	1	0	1	4	11	3	1	2	0	1	0	0	2	2	Chr01
Glyma.01G215500.Wm82.a2.v1	22.38	47.8	5.08	16.81	15.61	12.34	9.16	20.72	7.64	5.4	4.46	0	28.78	32.67	27.37	7.69	11.72	14.97	13.05	9.42	7.29	2.34	3.67	2.54	67	187	10	36	36	40	35	129	32	14	12	0	64	156	212	30	45	77	94	47	13	7	22	4	Chr01
Glyma.01G215700.Wm82.a2.v1	0.53	0.41	0.61	0.19	0.52	0.49	0.73	1.28	0.76	0.15	0.59	1.74	0.18	0.84	0.41	1.23	1.46	1.86	1	1.04	0.9	1.07	0.6	1.52	4	4	3	1	3	4	7	20	8	1	4	4	1	10	8	12	14	24	18	13	4	8	9	6	Chr01
Glyma.01G215800.Wm82.a2.v1	4.74	5.61	1.97	7.84	6.16	6.77	3.38	4.56	1.54	4.48	2.4	2.81	3.48	7.03	3.67	6.28	7.06	4.01	4.66	5.69	2.17	2.16	2.37	4.92	11	17	3	13	11	17	10	22	5	9	5	2	6	26	22	19	21	16	26	22	3	5	11	6	Chr01
Glyma.01G216000.Wm82.a2.v1	0	0.12	0	0	0	0	0	0	0	0	0	0	0.42	0	0.03	0	0	0	0	0	0	0	0	0	0	2	0	0	0	0	0	0	0	0	0	0	4	0	1	0	0	0	0	0	0	0	0	0	Chr01
Glyma.01G216400.Wm82.a2.v1	12.15	18.6	9.95	33.98	35.2	31.94	17.58	24.27	22.05	9.72	10.4	3.05	22.65	15.24	20.24	22.94	23.33	19.58	19.05	10.66	25.11	2.8	12.6	3.56	13	26	7	26	29	37	24	54	33	9	10	1	18	26	56	32	32	36	49	19	16	3	27	2	Chr01
Glyma.01G216500.Wm82.a2.v1	2.15	3.01	0	3.5	3.72	4.96	3.09	3.27	2.81	1.24	1.19	0	1.45	2.02	2.77	3.84	3.35	2.08	2.53	1.29	2.4	2.15	0.54	3.4	6	11	0	7	8	15	11	19	11	3	3	0	3	9	20	14	12	10	17	6	4	6	3	5	Chr01
Glyma.01G216900.Wm82.a2.v1	0	0.28	0	0	0.48	0	0	0.18	0	0	0	0	0	0	0	0.57	0	0.64	0	0.44	0	0	0	0	0	1	0	0	1	0	0	1	0	0	0	0	0	0	0	2	0	3	0	2	0	0	0	0	Chr01
Glyma.01G217100.Wm82.a2.v1	0	0	0	0.84	0.78	1.85	0.16	0.96	0.43	0.46	0.44	0	0.54	0.13	0.39	3.68	3.9	1.28	0.58	0.84	0	0.2	0.1	0	0	0	0	3	3	10	1	10	3	2	2	0	2	1	5	24	25	11	7	7	0	1	1	0	Chr01
Glyma.01G217200.Wm82.a2.v1	2.55	2.28	0	1.78	3.87	0.79	1	0.41	0.3	2.46	0.95	0	1.72	2.4	1.64	0.65	0.66	2.23	1.42	1.28	0	2.13	0.21	0.81	6	7	0	3	7	2	3	2	1	5	2	0	3	9	10	2	2	9	8	5	0	5	1	1	Chr01
Glyma.01G217300.Wm82.a2.v1	9.7	7.76	20.79	14.18	12.6	10.59	9.33	10.39	6.62	5.61	3.92	20.11	8.91	11.06	10.4	16.91	14.1	10.26	7.88	9.53	8.89	10.58	7.04	7.55	22	23	31	23	22	26	27	49	21	11	8	14	15	40	61	50	41	40	43	36	12	24	32	9	Chr01
Glyma.01G217400.Wm82.a2.v1	0.69	0.53	1.04	1.44	0.89	1.9	1.34	2.64	0.98	4.36	1.53	2.24	0	0.65	0	0.79	0.8	0.6	0.71	0.41	0	4.8	1.71	0.65	2	2	2	3	2	6	5	16	4	11	4	2	0	3	0	3	3	3	5	2	0	14	10	1	Chr01
Glyma.01G217500.Wm82.a2.v1	3.96	2.73	0.6	6.64	6.68	2.56	1.86	3.81	3.39	2.29	0.88	5.16	3.2	2.23	2.29	2.43	4.32	2.3	2.14	3.09	1.33	0.4	1.58	2.26	10	9	1	12	13	7	6	20	12	5	2	4	6	9	15	8	14	10	13	13	2	1	8	3	Chr01
Glyma.01G217600.Wm82.a2.v1	0	0	1.43	12.45	0.61	0	0	0	0	0.54	0	0	0	0	0.18	0.36	0.37	0	0	0	0	0	0.23	0	0	0	2	19	1	0	0	0	0	1	0	0	0	0	1	1	1	0	0	0	0	0	1	0	Chr01
Glyma.01G217800.Wm82.a2.v1	0	0	0	0	0	0	0	0.34	0	0	0	0	0	0	0	0	0	0	0	0	0	0	0	0	0	0	0	0	0	0	0	1	0	0	0	0	0	0	0	0	0	0	0	0	0	0	0	0	Chr01
Glyma.01G217900.Wm82.a2.v1	4.2	5.36	5.86	4.41	6.36	5.5	1.92	5.72	1.25	0.81	3.12	1.14	5.18	3.29	4.06	4.57	6.55	6.11	3.93	1.68	4.7	2.45	1.92	3.33	12	20	11	9	14	17	7	34	5	2	8	1	11	15	30	17	24	30	27	8	8	7	11	5	Chr01
Glyma.01G218000.Wm82.a2.v1	0	5.17	3.85	1.18	1.1	0	1.99	4.47	0.6	0	0	5.5	3.41	4.24	2.61	6.48	1.32	1.97	3.16	3.55	1.42	0.84	0.84	1.61	0	8	3	1	1	0	3	11	1	0	0	2	3	8	8	10	2	4	9	7	1	1	2	1	Chr01
Glyma.01G218100.Wm82.a2.v1	0.77	0.88	0.58	2.41	1.49	2.47	0.45	2.48	2.19	0.22	1.06	0	0	1.2	0.96	2.2	2.09	0.89	1.27	1.61	1.61	0.77	0.86	0.73	4	6	2	9	6	14	3	27	16	1	5	0	0	10	13	15	14	8	16	14	5	4	9	2	Chr01
Glyma.01G218200.Wm82.a2.v1	0	0	1.31	7.2	0	0	0	0	0	0	0	0	0	0	0	0	0	0	0	0	0	0	0	0	0	0	1	6	0	0	0	0	0	0	0	0	0	0	0	0	0	0	0	0	0	0	0	0	Chr01
Glyma.01G218300.Wm82.a2.v1	29.45	14.56	43.85	40.32	40.63	33.43	18.75	24.78	25.44	23.4	11.6	9.99	19.82	23.08	21.58	25.88	35.9	20.35	19.13	14.36	17.51	9.82	14.39	9.34	48	31	47	47	51	59	39	84	58	33	17	5	24	60	91	55	75	57	75	39	17	16	47	8	Chr01
Glyma.01G218400.Wm82.a2.v1	2.87	4.15	2.42	0.45	0.41	0.29	0.75	0.61	0.23	0.74	2.48	0	9.01	11.99	9	0.24	0.75	0.56	0.66	1.15	0	1.27	0.48	0	9	17	5	1	1	1	3	4	1	2	7	0	21	60	73	1	3	3	5	6	0	4	3	0	Chr01
Glyma.01G218500.Wm82.a2.v1	1.44	1.1	0	0	0	0	1.13	0	1.03	1.66	0	0	3.87	3.61	5.01	3.31	4.49	4.19	0	0.86	2.42	4.32	2.87	0	1	1	0	0	0	0	1	0	1	1	0	0	2	4	9	3	4	5	0	1	1	3	4	0	Chr01
Glyma.01G218600.Wm82.a2.v1	0	0.32	0	0	0.55	0.78	0.99	0	0.9	0	0	0	0	0.26	0.33	0.32	0.99	0.49	0.53	0.25	0	0	0	0	0	1	0	0	1	2	3	0	3	0	0	0	0	1	2	1	3	2	3	1	0	0	0	0	Chr01
Glyma.01G218800.Wm82.a2.v1	3	2.3	2.85	3.41	3.17	1.91	1.47	1.99	2.95	0.43	0.63	0.61	7.83	4.12	5.8	4.17	2.2	3.28	2.81	2.37	2.21	0.56	1.12	1.43	16	16	10	13	13	11	10	22	22	2	3	1	31	35	80	29	15	30	36	21	7	3	12	4	Chr01
Glyma.01G219000.Wm82.a2.v1	1.96	1.29	2.56	28.61	14.56	10.35	5.71	13.21	6.81	6.15	4.37	1.83	0.38	2.81	1.41	10.1	8.96	8.81	6.76	4.88	6.59	5.61	4.76	3.2	7	6	6	73	40	40	26	98	34	19	14	2	1	16	13	47	41	54	58	29	14	20	34	6	Chr01
Glyma.01G219100.Wm82.a2.v1	0	0	0	0	0	0.65	0	0.11	0.33	0	0	0	0	0.29	0.09	1.44	1.46	0.27	0.1	0	0	0	0	0	0	0	0	0	0	3	0	1	2	0	0	0	0	2	1	8	8	2	1	0	0	0	0	0	Chr01
Glyma.01G219200.Wm82.a2.v1	0.94	0.9	0	1.98	1.53	2.83	0.37	2.27	0.17	0	0	0	0.32	1.62	0.55	6.32	4.96	3.43	1.47	0.99	0.4	0.24	0.35	0	4	5	0	6	5	13	2	20	1	0	0	0	1	11	6	35	27	25	15	7	1	1	3	0	Chr01
Glyma.01G219400.Wm82.a2.v1	12.53	3.42	5.44	37.53	24.4	38.84	181.64	75.3	149.03	170.64	163.26	183.68	6.02	15.15	6.57	25.4	32.11	47.39	125.77	126.2	108.19	187.01	166.14	171.9	14	5	4	30	21	47	259	175	233	165	164	63	5	27	19	37	46	91	338	235	72	209	372	101	Chr01
Glyma.01G219600.Wm82.a2.v1	18.05	30.5	21.15	35.74	52.22	47.91	27.1	36.33	39.23	9.12	12.96	23.27	25.3	20.98	14.24	91.98	66.57	46.81	35.64	30.23	44.82	12.78	21.95	12.87	48	106	37	68	107	138	92	201	146	21	31	19	50	89	98	319	227	214	228	134	71	34	117	18	Chr01
Glyma.01G219700.Wm82.a2.v1	5.73	5.64	7.47	9.16	8.51	3.03	4.81	5.91	6.73	0	4.1	2.67	2.21	4.62	5.22	5.97	6.39	8.34	6.64	6.63	5.5	3.68	3.27	2.34	14	18	12	16	16	8	15	30	23	0	9	2	4	18	33	19	20	35	39	27	8	9	16	3	Chr01
Glyma.01G219800.Wm82.a2.v1	1.56	1.29	1.09	0.84	2.18	1.11	0.66	1.15	0.51	0.14	0.8	0.39	1.62	0.83	1.39	0.92	0.75	0.98	0.85	1.3	0.81	0.84	0.54	0.46	13	14	6	5	14	10	7	20	6	1	6	1	10	11	30	10	8	14	17	18	4	7	9	2	Chr01
Glyma.01G219900.Wm82.a2.v1	0.4	0	0.6	3.88	0	0	0	0.57	0	0	0	0	0	0	0.31	0	0	0	0.33	0.24	0	0.4	0	0	1	0	1	7	0	0	0	3	0	0	0	0	0	0	2	0	0	0	2	1	0	1	0	0	Chr01
Glyma.01G220000.Wm82.a2.v1	2.24	3.86	2.56	5.48	4.36	3.62	2.63	1.89	0.8	1.29	2.49	1.83	4.52	5.97	5.63	4.3	2.62	3.26	1.86	1.01	3.76	1.12	2.24	4.26	4	9	3	7	6	7	6	7	2	2	4	1	6	17	26	10	6	10	8	3	4	2	8	4	Chr01
Glyma.01G220100.Wm82.a2.v1	0.7	0	0	5.87	0	1.29	0	0.67	0	0	0	0	0	1.32	0	0.54	0.55	0	0.29	0	0	0	0	0	1	0	0	6	0	2	0	2	0	0	0	0	0	3	0	1	1	0	1	0	0	0	0	0	Chr01
Glyma.01G220200.Wm82.a2.v1	5.05	4.12	6.65	9.41	10.49	7.77	5.54	7.44	8.18	3.5	3.74	3.29	9.06	7.39	5.46	10.59	15.49	10.58	7.98	8.48	11.87	6.39	5.54	4.48	15	16	13	20	24	25	21	46	34	9	10	3	20	35	42	41	59	54	57	42	21	19	33	7	Chr01
Glyma.01G220300.Wm82.a2.v1	1.87	3.04	0.71	0.98	3.03	2.16	1.28	1.24	0.33	0.81	0.26	0.76	5.03	2.64	1.63	1.25	1.46	2.04	0.78	0.14	1.18	0	0.23	0	8	17	2	3	10	10	7	11	2	3	1	1	16	18	18	7	8	15	8	1	3	0	2	0	Chr01
Glyma.01G220400.Wm82.a2.v1	19.87	18.8	12.09	24.75	17.36	31.36	15.86	22.24	19.11	12.94	10.45	9.42	25.29	20.39	20.11	25.22	27.06	20.81	21.63	21.03	9.71	14.09	13.16	18.55	55	68	22	49	37	94	56	128	74	31	26	8	52	90	144	91	96	99	144	97	16	39	73	27	Chr01
Glyma.01G220600.Wm82.a2.v1	84.23	37.07	5.86	36.94	51.46	64.06	54.79	51.61	40.13	25.45	26.33	30.49	138.59	79.74	97.04	89.09	71.28	89.05	67.75	40.63	30.5	31.37	32.42	26.17	153	88	7	48	72	126	127	195	102	40	43	17	187	231	456	211	166	278	296	123	33	57	118	25	Chr01
Glyma.01G220700.Wm82.a2.v1	2.36	3.01	2.39	4.95	5.62	4.54	2.31	3.6	4.22	2.05	3.28	3.21	2.65	3.58	1.98	5.89	3.68	5.27	4.42	2.48	3.97	1.97	3.34	3.74	12	20	8	18	22	25	15	38	30	9	15	5	10	29	26	39	24	46	54	21	12	10	34	10	Chr01
Glyma.01G220800.Wm82.a2.v1	0.36	0	1.1	0.51	0.94	0	0	0	0	0	0	0	0	0.23	0.28	0.28	0	0	0	0	0	0	0	0	1	0	2	1	2	0	0	0	0	0	0	0	0	1	2	1	0	0	0	0	0	0	0	0	Chr01
Glyma.01G220900.Wm82.a2.v1	0.79	0.36	0	0.44	0.41	0.59	0.12	0.08	0.11	0	0	0	0	0.6	0.31	0.61	0.12	0.09	0.2	0	0	0	0	0	5	3	0	2	2	4	1	1	1	0	0	0	0	6	5	5	1	1	3	0	0	0	0	0	Chr01
Glyma.01G221000.Wm82.a2.v1	0	0	0	0	0	0	0	0.38	0	1.81	0.87	0	0	0	0	0	0.61	0.91	0.33	0	0	0.78	0	0	0	0	0	0	0	0	0	1	0	2	1	0	0	0	0	0	1	2	1	0	0	1	0	0	Chr01
Glyma.01G221100.Wm82.a2.v1	0.99	0	0	0	0	0.46	5.44	0.95	4.6	3.44	2.76	4.84	1.33	0.31	0.96	1.14	1.16	3.46	7.42	7.43	7.49	2.48	5.69	8.48	2	0	0	0	0	1	14	4	13	6	5	3	2	1	5	3	3	12	36	25	9	5	23	9	Chr01
Glyma.01G221200.Wm82.a2.v1	0.57	0	2.59	0	0	0	0.89	0.27	1.62	0	0	0	1.53	2.14	3.51	2.18	0.44	0.99	1.89	3.75	1.91	0.57	0.85	4.32	1	0	3	0	0	0	2	1	4	0	0	0	2	6	16	5	1	3	8	11	2	1	3	4	Chr01
Glyma.01G221300.Wm82.a2.v1	9.62	16.11	10.98	12.61	12.49	12.78	4.24	10.7	4.73	7.65	4.01	5.88	12.15	15.09	14.42	11.07	5.63	11.9	7	4.69	3.03	4.21	7.2	3.43	16	35	12	15	16	23	9	37	11	11	6	3	15	40	62	24	12	34	28	13	3	7	24	3	Chr01
Glyma.01G221500.Wm82.a2.v1	2.37	1.65	1.64	2.71	5.31	2.58	0.84	2.69	0.31	0.5	0.48	0	1.16	1.08	1.58	1.49	3.36	3.51	2.06	1.29	0.36	1.29	0.64	0.82	11	10	5	9	19	13	5	26	2	2	2	0	4	8	19	9	20	28	23	10	1	6	6	2	Chr01
Glyma.01G221600.Wm82.a2.v1	0	0.26	0	1.44	2.23	10.16	11.05	16.04	12.29	7.15	10.33	5.6	0	0	0.13	19.52	12.34	12.81	20.59	26	26.56	3.44	8.41	7.85	0	1	0	3	5	32	41	97	50	18	27	5	0	0	1	74	46	64	144	126	46	10	49	12	Chr01
Glyma.01G221700.Wm82.a2.v1	0.74	1.14	0.56	1.56	0.48	0.69	1.16	0.89	0.53	2.14	0.41	0	1.5	1.16	1	1.99	0.58	0.86	0.93	0.67	1.87	1.11	0.56	2.82	2	4	1	3	1	2	4	5	2	5	1	0	3	5	7	7	2	4	6	3	3	3	3	4	Chr01
Glyma.01G221800.Wm82.a2.v1	7.19	1.84	7.29	0	0	0	1.88	2.88	2.57	1.39	1.33	0	3.23	1.5	2.78	0.92	1.87	1.4	2.49	7.92	2.01	2.4	1.8	6.84	6	2	4	0	0	0	2	5	3	1	1	0	2	2	6	1	2	2	5	11	1	2	3	3	Chr01
Glyma.01G221900.Wm82.a2.v1	1.45	1.11	0	0	0.94	0	0	1.75	0	0	0	0	0	0.46	1.4	0.56	0.57	2.96	0.6	0.87	0	0	0	0	2	2	0	0	1	0	0	5	0	0	0	0	0	1	5	1	1	7	2	2	0	0	0	0	Chr01
Glyma.01G222000.Wm82.a2.v1	3.53	3.9	0.6	1.64	1.53	2.9	2.46	3.77	3.08	0.91	0.87	0	8.44	4.18	4.55	2.41	1.22	2.74	2.93	1.65	4.61	1.18	0.59	1.49	9	13	1	3	3	8	8	20	11	2	2	0	16	17	30	8	4	12	18	7	7	3	3	2	Chr01
Glyma.01G222100.Wm82.a2.v1	118.98	161.18	37.08	143.61	152.55	246.37	124.51	209.63	87.68	78.57	121.66	62.6	108.44	172.85	129.97	117.9	175.24	192.64	141.96	134.37	68.25	66.5	89.62	59.03	161	285	33	139	159	361	215	590	166	92	148	26	109	373	455	208	304	448	462	303	55	90	243	42	Chr01
Glyma.01G222200.Wm82.a2.v1	1.97	0	3.75	0	0	0	0	0	0	0	0	0	0	0	0.57	0	0	0	0	0	0	0	0	0	4	0	5	0	0	0	0	0	0	0	0	0	0	0	3	0	0	0	0	0	0	0	0	0	Chr01
Glyma.01G222400.Wm82.a2.v1	30.38	20.66	27.86	19.55	20.66	24.04	27.96	23.18	16.54	18.94	17.7	23.56	31.81	28.12	30.19	24.04	24.45	28.9	21.65	19.67	20.24	12.05	16.12	10.09	63	56	38	29	33	54	74	100	48	34	33	15	49	93	162	65	65	103	108	68	25	25	67	11	Chr01
Glyma.01G222500.Wm82.a2.v1	1.35	2.75	1.36	5.33	2.33	3.11	1.58	2.7	1.28	2.33	3	2.92	1.81	3.38	2.78	2.07	2.63	2.61	2.61	2.83	1.51	2.92	1.57	3.41	6	16	4	17	8	15	9	25	8	9	12	4	6	24	32	12	15	20	28	21	4	13	14	8	Chr01
Glyma.01G222600.Wm82.a2.v1	11.21	24.14	6.39	22.54	20.02	23.3	18.68	31	15.03	34.83	25.73	22.83	8.49	9.67	11.92	6.45	9.29	12.23	12.24	13.04	7.06	16.12	12.24	19.99	16	45	6	23	22	36	34	92	30	43	33	10	9	22	44	12	17	30	42	31	6	23	35	15	Chr01
Glyma.01G222700.Wm82.a2.v1	1.41	2.92	3.06	0.28	1.3	0.56	0.31	0.1	0.14	0	0	0	0.54	1.39	1.09	0.15	0.78	0	0.33	0	0	0.4	0.1	0	7	19	10	1	5	3	2	1	1	0	0	0	2	11	14	1	5	0	4	0	0	2	1	0	Chr01
Glyma.01G222800.Wm82.a2.v1	0	0	0	2.36	1.09	0	0	0	0.6	0	0	0	0	0	0.33	0	0	0	0	0.51	0	1.68	0	0	0	0	0	2	1	0	0	0	1	0	0	0	0	0	1	0	0	0	0	1	0	2	0	0	Chr01
Glyma.01G222900.Wm82.a2.v1	0.85	0	2.57	0	0	0	0	1.63	0	0	0.94	0	0	0	0.65	0.65	0.66	0.49	0.7	0	1.42	0.85	0	1.61	1	0	2	0	0	0	0	4	0	0	1	0	0	0	2	1	1	1	2	0	1	1	0	1	Chr01
Glyma.01G223000.Wm82.a2.v1	2.42	5.56	0	5.08	2.1	4.48	2.22	6.99	4.91	1.87	1.8	5.26	2.17	1.77	1.25	8.36	5.99	7.52	8.4	8.72	5.43	0.81	2.22	0	6	18	0	9	4	12	7	36	17	4	4	4	4	7	8	27	19	32	50	36	8	2	11	0	Chr01
Glyma.01G223100.Wm82.a2.v1	1.56	0.68	3.39	0.94	0.58	2.27	0.52	1.93	0.64	0.26	0.25	0	1.5	0.14	0.95	2.4	1.22	1.3	2.04	0.27	0.37	0	0.45	0	7	4	10	3	2	11	3	18	4	1	1	0	5	1	11	14	7	10	22	2	1	0	4	0	Chr01
Glyma.01G223200.Wm82.a2.v1	10.61	6.67	3.46	12.71	11.8	7.7	8.61	10.56	6.77	3.94	5.06	4.94	8.16	9.03	11.13	11.91	16.84	10.58	11.03	7.5	6.36	3.79	6.05	2.16	28	23	6	24	24	22	29	58	25	9	12	4	16	38	76	41	57	48	70	33	10	10	32	3	Chr01
Glyma.01G223400.Wm82.a2.v1	1.19	2.73	3.61	4.98	2.77	3.07	1.86	4.22	3.39	0.27	1.58	2.32	2.24	2.68	0.73	2.91	2.04	1.66	1.48	1.57	2.39	0.95	0.47	1.35	5	15	10	15	9	14	10	37	20	1	6	3	7	18	8	16	11	12	15	11	6	4	4	3	Chr01
Glyma.01G223500.Wm82.a2.v1	10.46	11.06	10.61	5.57	5.17	11.96	3.12	11.5	8.55	4.61	7.2	6.49	10.73	9.06	13.67	13.76	13.99	8.99	10.98	6.28	3.35	4.98	2.98	0.95	21	29	14	8	8	26	8	48	24	8	13	4	16	29	71	36	36	31	53	21	4	10	12	1	Chr01
Glyma.01G223600.Wm82.a2.v1	1.18	1.08	0.36	1.32	0.92	1.3	2.58	2.38	1.18	0.27	0	0.77	2.85	0.59	1.82	4.51	2.39	2.47	2.15	1.41	3.56	1.18	0.59	1.79	5	6	1	4	3	6	14	21	7	1	0	1	9	4	20	25	13	18	22	10	9	5	5	4	Chr01
Glyma.01G223700.Wm82.a2.v1	1.12	0.43	1.28	0.78	1.45	2.07	1.54	1.62	0.4	0.32	0.93	0	1.13	0.7	0.65	1.07	0.87	0.81	0.12	1.85	1.41	0.56	1.12	1.07	4	2	3	2	4	8	7	12	2	1	3	0	3	4	6	5	4	5	1	11	3	2	8	2	Chr01
Glyma.01G223800.Wm82.a2.v1	12.61	6.81	4.51	6.22	5.78	10.28	5.23	3.92	1.59	0.86	0.83	2.42	4.99	5.12	6.6	5.12	6.95	4.32	2.47	1.34	0	2.97	1.48	0	17	12	4	6	6	15	9	11	3	1	1	1	5	11	23	9	12	10	8	3	0	4	4	0	Chr01
Glyma.01G223900.Wm82.a2.v1	1.64	1.08	0	0.33	0	0	0.18	0.23	0.34	0.27	0.26	0	2.21	1.77	1.81	0.18	0.37	0.41	0.68	0.84	0.39	0	0.35	0.89	7	6	0	1	0	0	1	2	2	1	1	0	7	12	20	1	2	3	7	6	1	0	3	2	Chr01
Glyma.01G224000.Wm82.a2.v1	6.01	7.4	0.8	5.85	7.81	9.9	2.66	8.04	2.8	0.91	1.16	0	2.11	6.39	3.94	13.84	9.18	14.6	9.78	7.06	2.63	1.83	2.61	1.49	23	37	2	16	23	41	13	64	15	3	4	0	6	39	39	69	45	96	90	45	6	7	20	3	Chr01
Glyma.01G224100.Wm82.a2.v1	2.2	2.95	0.84	0	0	2.04	1.3	0.53	0.39	0.64	0	0	1.48	1.73	0.85	0	0	1.6	0.69	0.33	0	0	0.27	0	4	7	1	0	0	4	3	2	1	1	0	0	2	5	4	0	0	5	3	1	0	0	1	0	Chr01
Glyma.01G224200.Wm82.a2.v1	1.48	1.51	1.25	2.07	0.86	1.07	0.39	1.27	0.35	0.76	0.37	0	0.67	1.96	1.78	1.64	0.77	1.44	1.16	0.49	0.28	0.99	0.74	0	9	12	5	9	4	7	3	16	3	4	2	0	3	19	28	13	6	15	17	5	1	6	9	0	Chr01
Glyma.01G224300.Wm82.a2.v1	11.23	10.35	16.63	13.68	14.2	9.84	8.8	12.32	10.08	5.66	9.61	8.44	11.63	14.08	12.13	16.78	15.27	12.56	12.21	11.75	18.37	9.5	10.78	12.59	39	47	38	34	38	37	39	89	49	17	30	9	30	78	109	76	68	75	102	68	38	33	75	23	Chr01
Glyma.01G224400.Wm82.a2.v1	0	0	0	1.51	0	0	0	0	0	0	0	0	2.18	0	0.42	0	0.42	0	0	0	0	0	0	0	0	0	0	2	0	0	0	0	0	0	0	0	3	0	2	0	1	0	0	0	0	0	0	0	Chr01
Glyma.01G224500.Wm82.a2.v1	0.38	1.44	1.14	0	0	0	0.29	0	0	0	0	0	0.51	0.71	0.44	0.29	0.59	0	0	0	0	0	0	0	1	5	2	0	0	0	1	0	0	0	0	0	1	3	3	1	2	0	0	0	0	0	0	0	Chr01
Glyma.01G224600.Wm82.a2.v1	0	0.59	0	2.15	0	4.26	0	1.11	0	0	0	0	0	0.48	0.89	0.59	1.2	0.45	0	0	0	0	0	0	0	1	0	2	0	6	0	3	0	0	0	0	0	1	3	1	2	1	0	0	0	0	0	0	Chr01
Glyma.01G224700.Wm82.a2.v1	0.45	2.07	0	0.63	1.76	5	2.12	1.3	3.54	0.52	2.01	1.47	3.64	1.98	1.57	6.57	7.74	5.51	3.19	5.95	3.78	1.8	3.15	7.72	1	6	0	1	3	12	6	6	11	1	4	1	6	7	9	19	22	21	17	22	5	4	14	9	Chr01
Glyma.01G224800.Wm82.a2.v1	0	0	0	0.6	0	0	0	0	0	0.5	0	0	0	0	0.5	0	0	0	0.18	0	0	0	0	0	0	0	0	1	0	0	0	0	0	1	0	0	0	0	3	0	0	0	1	0	0	0	0	0	Chr01
Glyma.01G224900.Wm82.a2.v1	1.11	0	0	3.86	1.43	2.55	0	1.33	0	0	0	0	0	0.35	0	1.27	1.72	4.18	2.3	0.66	0	0	0.83	0	2	0	0	5	2	5	0	5	0	0	0	0	0	1	0	3	4	13	10	2	0	0	3	0	Chr01
Glyma.01G225100.Wm82.a2.v1	0.49	0	0	2.05	1.27	0	0	0.71	0	0.57	1.09	0	0	0	0	1.13	0.38	1.14	0.61	0	0.82	0	0.49	0.93	1	0	0	3	2	0	0	3	0	1	2	0	0	0	0	3	1	4	3	0	1	0	2	1	Chr01
Glyma.01G225200.Wm82.a2.v1	18.54	18.18	14.1	22.28	24.07	20.33	11.35	23.96	10.56	3.35	7.41	7.55	18.72	21.25	19.49	20.44	23.28	25.79	19.39	15.99	12.65	9.85	6.36	8.26	64	82	32	55	64	76	50	172	51	10	23	8	48	117	174	92	103	153	161	92	26	34	44	15	Chr01
Glyma.01G225300.Wm82.a2.v1	31.78	33.78	50.11	49.36	46.6	41.85	31.36	40.18	34.91	27.2	30.11	42.18	40.4	39.85	41.63	52.36	50.03	40.41	40.13	42.02	45.45	37.66	28.19	36.93	54	75	56	60	61	77	68	142	83	40	46	22	51	108	183	116	109	118	164	119	46	64	96	33	Chr01
Glyma.01G225400.Wm82.a2.v1	36.52	32.32	29.5	51.06	41.49	35.83	20.57	26.34	13.87	7.91	6.35	3.72	52.24	40.79	56.47	40.27	48.96	39.18	33.22	21.92	19.16	11.41	17.09	23.87	32	37	17	32	28	34	23	48	17	6	5	1	34	57	128	46	55	59	70	32	10	10	30	11	Chr01
Glyma.01G225700.Wm82.a2.v1	17.27	18.92	8.95	17.01	16.81	16.67	4	17.36	5.05	7.26	2.62	6.39	11.62	15.01	11.53	14.75	21.43	15.53	14.36	14.13	7.91	8.24	6.07	2.24	44	63	15	31	33	46	13	92	18	16	6	5	22	61	76	49	70	68	88	60	12	21	31	3	Chr01
Glyma.01G225800.Wm82.a2.v1	1.61	2.16	0.61	6.75	2.09	3.72	1.89	6.19	1.44	0	1.34	1.31	3.25	4.04	3.42	3.09	4.71	3.98	2.51	1.93	0	2.01	1.61	1.53	4	7	1	12	4	10	6	32	5	0	3	1	6	16	22	10	15	17	15	8	0	5	8	2	Chr01
Glyma.01G225900.Wm82.a2.v1	9.48	6.32	2.32	11.96	18.25	23.43	7.19	13.81	9.83	6.36	4.42	7.97	5.35	5.37	3.78	16.18	18.12	12.27	10.29	8.62	12.83	6.11	4.27	6.39	31	27	5	28	46	83	30	94	45	18	13	8	13	28	32	69	76	69	81	47	25	20	28	11	Chr01
Glyma.01G226000.Wm82.a2.v1	7.03	9.99	3.05	5.61	7.39	7.42	3.93	5.47	6.46	2.71	2.61	2.18	12.61	11.75	11.12	11.81	6	8.57	8.07	3.82	2.81	1.34	3.51	3.18	21	39	6	12	17	24	15	34	27	7	7	2	28	56	86	46	23	44	58	19	5	4	21	5	Chr01
Glyma.01G226100.Wm82.a2.v1	8.56	14.85	6.07	8.78	7.41	13.17	14.76	10.15	11.42	16.49	12.7	13.01	13.83	13.6	11.91	9.19	11.13	9.3	18.27	14.38	12.46	14.26	13.38	16.28	15	34	7	11	10	25	33	37	28	25	20	7	18	38	54	21	25	28	77	42	13	25	47	15	Chr01
Glyma.01G226200.Wm82.a2.v1	1.85	3.44	1.21	0	2.74	3.42	0.21	3.3	0	0	0	0	2.49	3.48	1.84	2.03	4.12	2.61	0.66	0.95	0.44	0	0.13	0	7	17	3	0	8	14	1	26	0	0	0	0	7	21	18	10	20	17	6	6	1	0	1	0	Chr01
Glyma.01G226300.Wm82.a2.v1	0.57	0.43	0	0	0	0	0	0	0	0	0	0	0	0	0	0	0	0	0	0	0	0	0	0	1	1	0	0	0	0	0	0	0	0	0	0	0	0	0	0	0	0	0	0	0	0	0	0	Chr01
Glyma.01G226400.Wm82.a2.v1	0	0	0	0	0	0	0	0	0	0	0	0	0	0	0	0	0	0.23	0	0	0	0	0	0	0	0	0	0	0	0	0	0	0	0	0	0	0	0	0	0	0	1	0	0	0	0	0	0	Chr01
Glyma.01G226600.Wm82.a2.v1	1	0.77	1.53	2.1	3.58	1.39	1.57	2.89	1.61	0.87	1.4	0.82	0.68	1.26	0.87	4.23	3.13	3.65	1.67	1.66	1.26	0.5	1.13	0.48	4	4	4	6	11	6	8	24	9	3	5	1	2	8	9	22	16	25	16	11	3	2	9	1	Chr01
Glyma.01G226700.Wm82.a2.v1	9.39	12.85	17.75	8.36	6.28	7.1	4.68	6.57	6.51	5.26	3.8	7.42	12.65	9.82	12.43	5.68	5.55	6.79	6.04	3.59	6.21	3.42	4.12	4.33	33	59	41	21	17	27	21	48	32	16	12	8	33	55	113	26	25	41	51	21	13	12	29	8	Chr01
Glyma.01G226800.Wm82.a2.v1	15.48	12.21	7.85	21.65	19.49	22.96	19.49	25.27	11.74	21.69	18.79	22.93	8.21	12.95	11.24	14.4	15.74	22.39	14.05	18.86	8.67	20.64	10.07	16.95	33	34	11	33	32	53	53	112	35	40	36	15	13	44	62	40	43	82	72	67	11	44	43	19	Chr01
Glyma.01G226900.Wm82.a2.v1	2.07	2.11	3.67	3.85	2.68	1.27	1.35	1.32	0.98	0.4	1.92	1.12	0.93	2.81	2.4	0.79	0.54	1.4	3.15	3.1	1.73	2.75	1.72	0	6	8	7	8	6	4	5	8	4	1	5	1	2	13	18	3	2	7	22	15	3	8	10	0	Chr01
Glyma.01G227000.Wm82.a2.v1	12.2	11.13	6.42	12.14	8.22	8.67	6.8	8.12	4.36	6.24	4.96	1.53	11.69	16.77	16.78	7.56	9.15	9.28	6.54	7.32	5.91	7.04	4.21	5.35	52	62	18	37	27	40	37	72	26	23	19	2	37	114	185	42	50	68	67	52	15	30	36	12	Chr01
Glyma.01G227100.Wm82.a2.v1	1.51	0.19	0	0	0	0	0	0.36	0.18	0	0	0	0.34	0.47	0.58	0	0.39	0	0.21	0.15	0	0	0.13	0.48	6	1	0	0	0	0	0	3	1	0	0	0	1	3	6	0	2	0	2	1	0	0	1	1	Chr01
Glyma.01G227200.Wm82.a2.v1	5.43	4.55	5.11	10.13	9.4	9.55	11.35	9.95	8.32	4.78	5.47	5.06	8.01	6	3.8	10.91	11.1	9.63	7.53	9.78	7.82	3.36	7.1	6.89	21	23	13	28	28	40	56	80	45	16	19	6	23	37	38	55	55	64	70	63	18	13	55	14	Chr01
Glyma.01G227300.Wm82.a2.v1	45.23	57.84	47.06	69.06	61.04	55.51	50.37	51.22	48.92	28.2	31.12	17.45	56.89	64.94	51.3	78.06	81.71	59.57	45.29	39.64	45.97	18.45	25.84	29.43	76	127	52	83	79	101	108	179	115	41	47	9	71	174	223	171	176	172	183	111	46	31	87	26	Chr01
Glyma.01G227400.Wm82.a2.v1	8.99	18.1	2.88	4.63	5.53	5.24	3.71	7.73	3.72	2.73	3.68	1.54	8.92	11.87	10.61	7.26	6.64	6.61	7.28	2.27	3.97	0.95	0.94	5.4	19	50	4	7	9	12	10	34	11	5	7	1	14	40	58	20	18	24	37	8	5	2	4	6	Chr01
Glyma.01G227500.Wm82.a2.v1	0.6	0.31	2.13	0.28	0.52	0.19	0.16	0.19	0	0.23	0.45	0.65	1.35	0.38	1.01	0.15	0.16	0	0.25	0	0.34	0.4	0.4	0.38	3	2	7	1	2	1	1	2	0	1	2	1	5	3	13	1	1	0	3	0	1	2	4	1	Chr01
Glyma.01G227600.Wm82.a2.v1	3.62	6.46	3.66	3.37	4.69	7.79	3.78	2.32	5.17	2.79	0	3.93	8.11	5.29	4.19	5.55	3.76	3.51	4.51	3.62	8.09	2.41	0.6	4.58	3	7	2	2	3	7	4	4	6	2	0	1	5	7	9	6	4	5	9	5	4	2	1	2	Chr01
Glyma.01G227700.Wm82.a2.v1	10.8	7.9	15.71	8.53	12.19	7.8	5.89	6.32	6.71	3.8	1.57	1.53	6.95	9.72	9.44	18.37	12.82	10.93	6.25	4.23	7.1	2.82	5.15	3.57	23	22	22	13	20	18	16	28	20	7	3	1	11	33	52	51	35	40	32	15	9	6	22	4	Chr01
Glyma.01G227800.Wm82.a2.v1	0	0	0	0	0	0	0.41	0	0	0	0	0	0	0	0	0	0	0	0	0	0	0	0	0	0	0	0	0	0	0	2	0	0	0	0	0	0	0	0	0	0	0	0	0	0	0	0	0	Chr01
Glyma.01G227900.Wm82.a2.v1	3.73	3.93	6.38	27.39	20.59	86.16	656.61	211.74	685.87	541.82	430.72	1018.32	5.02	4.1	3.43	216.84	80.79	277.16	438.19	485.16	762.19	717.38	705.2	583.79	8	11	9	42	34	200	1796	944	2057	1005	830	670	8	14	19	606	222	1021	2259	1733	973	1538	3029	658	Chr01
Glyma.01G228000.Wm82.a2.v1	0	0.14	0.27	0.25	0.23	0.17	0.42	0.35	0.64	0.21	0.2	0	0.24	0.45	0.07	0.14	0.84	0.52	0.15	0.11	0	0.18	0	0	0	1	1	1	1	1	3	4	5	1	1	0	1	4	1	1	6	5	2	1	0	1	0	0	Chr01
Glyma.01G228100.Wm82.a2.v1	1.31	1.76	2.5	1.84	0.43	3.34	1.29	2.05	1.88	0.76	1.83	0	0.88	1.24	0.89	0.76	1.54	0.96	1.5	1.97	1.66	2.3	1.31	1.25	4	7	5	4	1	11	5	13	8	2	5	0	2	6	7	3	6	5	11	10	3	7	8	2	Chr01
Glyma.01G228200.Wm82.a2.v1	0.78	0.3	2.06	0.27	1.01	0.72	0.15	1.21	0.14	0.22	0.43	0	0.52	0.36	0.37	0.59	0.6	0.68	0.48	0.58	0.33	0.58	0.58	0.37	4	2	7	1	4	4	1	13	1	1	2	0	2	3	5	4	4	6	6	5	1	3	6	1	Chr01
Glyma.01G228300.Wm82.a2.v1	7.05	6.94	4.6	5.63	11.12	6.98	4.34	5.09	7.2	4.66	2.24	4.92	6.1	6	6.04	3.09	6.29	7.62	6.49	6.95	5.07	6.04	4.27	3.83	14	18	6	8	17	15	11	21	20	8	4	3	9	19	31	8	16	26	31	23	6	12	17	4	Chr01
Glyma.01G228400.Wm82.a2.v1	30.24	21.78	9.47	28.6	26.56	18.89	10.46	20.96	10.81	12.34	14.84	0	46.7	38.49	29.57	15.69	27.75	18.12	20.34	12.28	14.94	8	11.99	8.46	34	32	7	23	23	23	15	49	17	12	15	0	39	69	86	23	40	35	55	23	10	9	27	5	Chr01
Glyma.01G228500.Wm82.a2.v1	12.46	12.19	7.93	12.56	13.92	11.77	5.9	10.45	8.08	6.36	3.54	5.66	10.14	10.17	11.31	7.11	9.94	8.6	6.87	8	9.24	4.63	5.2	6.06	43	55	18	31	37	44	26	75	39	19	11	6	26	56	101	32	44	51	57	46	19	16	36	11	Chr01
Glyma.01G228600.Wm82.a2.v1	0	0	0	0	0	0	0	0	0	0	0	0	0	0	0.28	0	0	0	0	0.43	0	0	0	0	0	0	0	0	0	0	0	0	0	0	0	0	0	0	1	0	0	0	0	1	0	0	0	0	Chr01
Glyma.01G228700.Wm82.a2.v1	16.68	19.9	0.75	58.98	23.56	33.97	11.92	52.36	10.52	3.4	3.82	1.6	32.36	43.06	25.6	12.79	21.43	22.83	16.93	13.54	6.59	1.96	4.41	0.93	34	53	1	86	37	75	31	222	30	6	7	1	49	140	135	34	56	80	83	46	8	4	18	1	Chr01
Glyma.01G228800.Wm82.a2.v1	0.47	0.89	0.71	1.31	0	2.16	0.73	1.57	0.5	0.27	0.52	0	0.94	1.91	1.27	0.9	1.64	1.63	0.97	1.12	0.39	0.47	0.47	0.44	2	5	2	4	0	10	4	14	3	1	2	0	3	13	14	5	9	12	10	8	1	2	4	1	Chr01
Glyma.01G228900.Wm82.a2.v1	2.27	2.11	2.22	2.04	4.43	2.55	1.02	2.34	1.63	0.94	0.72	1.06	0.87	3.16	2.01	3.49	4.69	2.93	2.16	1.95	1.36	0.49	0.89	0.62	14	17	9	9	21	17	8	30	14	5	4	2	4	31	32	28	37	31	32	20	5	3	11	2	Chr01
Glyma.01G229000.Wm82.a2.v1	6.35	5.46	20.51	37.71	16.48	8.06	2.49	7.63	5.67	0.92	2.65	0	7.48	7.96	6.13	7.3	10.52	7.85	3.3	2.38	6.66	4.76	5.15	6.03	8	9	17	34	16	11	4	20	10	1	3	0	7	16	20	12	17	17	10	5	5	6	13	4	Chr01
Glyma.01G229200.Wm82.a2.v1	1.45	0.47	1.57	0.29	0.8	0.38	0.16	0.2	0.15	0	0.23	0	0.56	0.39	1.12	0.32	0.48	0.36	0.34	0	0	0	0.1	0.39	7	3	5	1	3	2	1	2	1	0	1	0	2	3	14	2	3	3	4	0	0	0	1	1	Chr01
Glyma.01G229400.Wm82.a2.v1	2.83	3.66	9.69	2.72	5.51	3.11	4.16	4.68	4.93	2.45	1.77	6.92	3.1	3	3.01	5.7	5.52	3.91	3.39	4.14	5.65	4.78	3.44	4.71	16	27	36	11	24	19	30	55	39	12	9	12	13	27	44	42	40	38	46	39	19	27	39	14	Chr01
Glyma.01G229500.Wm82.a2.v1	1.6	1.43	3.65	1.87	1.73	2.96	0.42	1.93	2.48	0.93	1.49	1.74	1.8	1.84	1.65	1.64	3.33	1.71	2.11	1.12	1.35	1.33	0.8	1.52	6	7	9	5	5	12	2	15	13	3	5	2	5	11	16	8	16	11	19	7	3	5	6	3	Chr01
Glyma.01G229600.Wm82.a2.v1	0.65	3.25	0	3.66	11.03	7.85	0.26	1.89	0.7	0	0.36	0	2.64	1.43	0.51	4.51	6.63	2.09	0.68	0.78	1.1	0.33	0.65	0.62	2	13	0	8	26	26	1	12	3	0	1	0	6	7	4	18	26	11	5	4	2	1	4	1	Chr01
Glyma.01G229700.Wm82.a2.v1	10	12.21	5.43	9.66	12.99	8.36	8.4	9.16	11.07	6.06	3.97	6.21	5.45	7.32	7.73	15.71	13.01	5.82	10.2	8.29	8.8	4.76	5.35	4.08	42	67	15	29	42	38	45	80	65	22	15	8	17	49	84	86	70	42	103	58	22	20	45	9	Chr01
Glyma.01G229800.Wm82.a2.v1	19.45	11.28	4.48	9.89	3.83	6.53	2.77	6.23	3.37	2.72	3.93	3.84	19.04	8.87	12.99	5.43	3.68	5.14	6.13	2.48	1.98	2.36	1.76	3.36	33	25	5	12	5	12	6	22	8	4	6	2	24	24	57	12	8	15	25	7	2	4	6	3	Chr01
Glyma.01G229900.Wm82.a2.v1	2.46	2.58	1.87	3.43	4.78	3.12	1.92	3.54	1.98	0.35	0	2	2.89	4.24	2.14	5.18	5.51	4.65	3.19	2.03	3.09	0.61	0.92	0.58	8	11	4	8	12	11	8	24	9	1	0	2	7	22	18	22	23	26	25	11	6	2	6	1	Chr01
Glyma.01G230000.Wm82.a2.v1	1.07	0	0	0	2.09	0.5	0	0.26	0	0	0	0	0	0	0	0.41	0.84	0	0	0	0	0	0	0	2	0	0	0	3	1	0	1	0	0	0	0	0	0	0	1	2	0	0	0	0	0	0	0	Chr01
Glyma.01G230100.Wm82.a2.v1	0	0	1.77	0	0	0.36	0	0.37	0	0	0	0	0	0	0	0.3	0	0	0.16	0	0	0	0	0	0	0	3	0	0	1	0	2	0	0	0	0	0	0	0	1	0	0	1	0	0	0	0	0	Chr01
Glyma.01G230200.Wm82.a2.v1	618.49	512.41	971.5	499.18	483.46	612.27	438.32	697.21	515.1	403.35	454.85	368.73	455.13	457.87	580.3	474.37	616.84	576.13	453.59	359.3	389.89	416.86	465.7	413.82	847	917	875	489	510	908	766	1986	987	478	560	155	463	1000	2056	847	1083	1356	1494	820	318	571	1278	298	Chr01
Glyma.01G230300.Wm82.a2.v1	17.6	15.58	20.08	25.38	36.42	50.8	25	39.67	41.28	30.51	22.64	21.51	16.29	12.07	14.03	36.29	32.61	38.73	46.66	33.34	45.26	16.5	29.92	20.92	32	37	24	33	51	100	58	150	105	48	37	12	22	35	66	86	76	121	204	101	49	30	109	20	Chr01
Glyma.01G230400.Wm82.a2.v1	3.46	4.54	0.75	6.23	7.07	2.28	0.78	3.33	3.18	2.29	0	6.45	3.33	3.1	2.3	2.28	2.7	4.61	0.82	2.67	0.83	1.48	2.22	1.88	7	12	1	9	11	5	2	14	9	4	0	4	5	10	12	6	7	16	4	9	1	3	9	2	Chr01
Glyma.01G230600.Wm82.a2.v1	0.57	0.22	0	0.79	0.37	2.09	0	1.9	0.61	0.33	0	0	1.52	1.42	0.98	0.65	1.32	2.14	0.59	0.85	0	0.28	0.56	0	2	1	0	2	1	8	0	14	3	1	0	0	4	8	9	3	6	13	5	5	0	1	4	0	Chr01
Glyma.01G230700.Wm82.a2.v1	15.07	11.33	5.53	11.26	12.82	12.23	6.51	8.99	9.28	3.6	6.36	1.69	14.69	10.42	7.73	12.35	16.01	9.67	6.91	8.26	9.6	3.9	4.54	3.46	58	57	14	31	38	51	32	72	50	12	22	2	42	64	77	62	79	64	64	53	22	15	35	7	Chr01
Glyma.01G230900.Wm82.a2.v1	16.52	9.89	3.28	10.04	10.25	9.28	5.06	6.21	5.13	2.49	1.6	0	9.67	15.31	24.98	2.75	6.72	6.27	3.28	3.88	2.41	0.72	0.36	2.73	23	18	3	10	11	14	9	18	10	3	2	0	10	34	90	5	12	15	11	9	2	1	1	2	Chr01
Glyma.01G231400.Wm82.a2.v1	4.63	4.91	6.5	4.98	11.57	7.24	6.98	4.11	6.88	2.88	4.76	1.16	8.64	3.35	3.03	6.29	8.06	6.43	4.3	4.06	4.19	1.78	2.67	2.03	13	18	12	10	25	22	25	24	27	7	12	1	18	15	22	23	29	31	29	19	7	5	15	3	Chr01
Glyma.01G231600.Wm82.a2.v1	3.95	4.27	2.12	4.23	5.13	5.37	2.55	3.8	2.66	2.15	1.81	2.27	4.7	3.65	4.31	4.28	5.44	5.14	3.09	4.19	1.56	1.39	1.39	3.1	17	24	6	13	17	25	14	34	16	8	7	3	15	25	48	24	30	38	32	30	4	6	12	7	Chr01
Glyma.01G231700.Wm82.a2.v1	1.71	2.62	4.17	1.92	3.56	2.22	2.15	4.29	4.17	5.15	1.91	4.47	4.62	1.94	2.39	6.84	4.01	2.99	2.28	2.47	6.91	3.43	2.4	0	5	10	8	4	8	7	8	26	17	13	5	4	10	9	18	26	15	15	16	12	12	10	14	0	Chr01
Glyma.01G231800.Wm82.a2.v1	4.35	2.85	23.6	0.87	0.81	0.57	0	0.3	0	0	0	0	0.84	2.73	4.8	1.43	1.45	0.36	4.9	0.37	4.17	1.24	0.31	2.36	7	6	25	1	1	1	0	1	0	0	0	0	1	7	20	3	3	1	19	1	4	2	1	2	Chr01
Glyma.01G231900.Wm82.a2.v1	19.65	19.01	13.18	6.46	6	4.8	14.49	10.83	17.76	10.02	14.78	15.06	17.89	12.68	18.31	9.75	13.97	8.41	12.73	12.48	11.64	8.67	10.09	15.38	34	43	15	8	8	9	32	39	43	15	23	8	23	35	82	22	31	25	53	36	12	15	35	14	Chr01
Glyma.01G232000.Wm82.a2.v1	0	0	0	0	0	0	0	0	0	0	0	0	0	0	0	0.64	0	0	0	0	0	0	0	0	0	0	0	0	0	0	0	0	0	0	0	0	0	0	0	1	0	0	0	0	0	0	0	0	Chr01
Glyma.01G232100.Wm82.a2.v1	11.01	16.03	16.2	22.34	19.82	15.08	10.29	17.24	17.25	11.49	10.66	11.57	22.46	13.58	13.04	23.15	15.78	14.25	17.86	16.62	23.25	12.42	12.23	12.83	31	59	30	45	43	46	37	101	68	28	27	10	47	61	95	85	57	69	121	78	39	35	69	19	Chr01
Glyma.01G232300.Wm82.a2.v1	25.61	22.3	28.2	46.91	37.83	22.83	22.84	27.17	22.72	12.25	18.66	20.14	23.78	28.24	20.48	24.38	28.24	32.89	23.13	14.84	29.66	19.42	17.63	25.19	29	33	21	38	33	28	33	64	36	12	19	7	20	51	60	36	41	64	63	28	20	22	40	15	Chr01
Glyma.01G232500.Wm82.a2.v1	7.01	4.02	1.86	3.43	3.87	4.85	2.88	4.29	1.38	0.4	1.75	1.14	7.54	7.25	8.87	3.22	2.32	2.96	2.55	2	2.06	0.7	1.05	1	40	30	7	14	17	30	21	51	11	2	9	2	32	66	131	24	17	29	35	19	7	4	12	3	Chr01
Glyma.01G232600.Wm82.a2.v1	43.33	44.42	44.13	51.13	41.29	41.85	22.43	38.03	21.31	20.21	26.09	10.36	46.56	52.6	50.71	32.93	32.87	31	23.97	23.62	18.69	14.71	16.86	18.9	109	146	73	92	80	114	72	199	75	44	59	8	87	211	330	108	106	134	145	99	28	37	85	25	Chr01
Glyma.01G233000.Wm82.a2.v1	7.85	11.11	13.72	11.52	10.19	8.7	9.84	8.49	11.22	7.71	5.24	10.23	7.92	7.14	6.98	6.32	7.96	6.17	6.53	5.89	7.91	9.81	5.09	8.96	20	37	23	21	20	24	32	45	40	17	12	8	15	29	46	21	26	27	40	25	12	25	26	12	Chr01
Glyma.01G233100.Wm82.a2.v1	0	0.48	0	0.87	0	0.58	0	0.3	0	0	0	0	0	0	0	0.48	0.49	0.18	0	0	0	0	0	0	0	2	0	2	0	2	0	2	0	0	0	0	0	0	0	2	2	1	0	0	0	0	0	0	Chr01
Glyma.01G233200.Wm82.a2.v1	4.85	2.72	5.41	6.78	3.36	2.69	2.28	3.89	1.16	1.49	2.88	1.05	4.79	4.66	4.13	4.22	2.27	4.14	3.23	3.11	2.72	2.26	1.45	2.46	15	11	11	15	8	9	9	25	5	4	8	1	11	23	33	17	9	22	24	16	5	7	9	4	Chr01
Glyma.01G233300.Wm82.a2.v1	5.4	5.22	3.62	6.22	5.15	3.67	1.99	4.2	2.72	4.22	1.94	3.62	5.56	4.38	6.75	5.85	4.71	3.79	4.42	1.71	1.87	1.9	1.98	3.93	34	43	15	28	25	25	16	55	24	23	11	7	26	44	110	48	38	41	67	18	7	12	25	13	Chr01
Glyma.01G233400.Wm82.a2.v1	0	0	0.81	0	0	0	0	0	0	0	0	0	0	0	0	0	0	0	0	0	0	0	0	0	0	0	1	0	0	0	0	0	0	0	0	0	0	0	0	0	0	0	0	0	0	0	0	0	Chr01
Glyma.01G233500.Wm82.a2.v1	9.61	6.54	6.5	10.45	8.32	12.33	7.53	7.7	5.34	3.7	6.54	6.96	8.63	12.73	9.91	9.83	8.33	6.53	8.22	9.94	6.28	3.2	6.93	5.08	18	16	8	14	12	25	18	30	14	6	11	4	12	38	48	24	20	21	37	31	7	6	26	5	Chr01
Glyma.01G233600.Wm82.a2.v1	12.56	11.26	5.46	11.04	8.85	10.77	3.66	10.01	6.16	3.32	5.39	1.17	7	12.83	11.72	11.84	13.16	9.81	7.31	7	3.92	2.51	2.33	3.75	70	82	20	44	38	65	26	116	48	16	27	2	29	114	169	86	94	94	98	65	13	14	26	11	Chr01
Glyma.01G233700.Wm82.a2.v1	6.58	12.59	5.84	8.43	12.1	14.18	8.17	8.44	9.02	8.24	4.88	5.36	6.65	14.44	12.93	7.57	6.42	12.13	11.63	6.25	6.45	8.23	7.39	4.17	12	30	7	11	17	28	19	32	23	13	8	3	9	42	61	18	15	38	51	19	7	15	27	4	Chr01
Glyma.01G234000.Wm82.a2.v1	1.48	0	10.53	5.53	1.28	1.37	0.78	0.95	0.35	1.14	2.2	0	0	0.93	1.53	0.76	0	0.58	0.21	0.59	1.66	0.99	0.25	0.94	3	0	14	8	2	3	2	4	1	2	4	0	0	3	8	2	0	2	1	2	2	2	1	1	Chr01
Glyma.01G234100.Wm82.a2.v1	0	0.19	0.38	0	0.65	1.84	0.59	1.08	0.53	0.58	0	0	0.67	0.78	0.77	0.96	1.94	0.73	1.24	0.45	0	0.75	0.62	0.47	0	1	1	0	2	8	3	9	3	2	0	0	2	5	8	5	10	5	12	3	0	3	5	1	Chr01
Glyma.01G234200.Wm82.a2.v1	79.81	72.36	118.71	70.34	93.47	98.53	61.18	94.67	89.89	43.1	52.1	50.87	86.41	73.97	96.9	129.74	85.93	112.55	99.54	83.8	90.3	48.57	51.51	41.24	92	109	90	58	83	123	90	227	145	43	54	18	74	136	289	195	127	223	276	161	62	56	119	25	Chr01
Glyma.01G234300.Wm82.a2.v1	3.45	3.91	10.29	8.5	8.25	5.87	4.98	8.77	7.11	3.83	4.46	5.4	6.51	4.59	4.22	9	8.62	8.36	7.52	6.46	10.2	3.87	4.2	4.2	25	37	49	44	46	46	46	132	72	24	29	12	35	53	79	85	80	104	131	78	44	28	61	16	Chr01
Glyma.01G234400.Wm82.a2.v1	2.64	1.35	0	3.07	9.13	21.1	7.23	15.63	14.76	7.62	6.84	5.73	0.59	0.28	0.17	14.16	16.8	19.18	14.62	9.49	11.81	6.15	6.36	8.36	6	4	0	5	16	52	21	74	47	15	14	4	1	1	1	42	49	75	80	36	16	14	29	10	Chr01
Glyma.01G234500.Wm82.a2.v1	76.7	93.65	23.58	43.36	37.54	27.09	40.07	21.16	18.27	11.14	13.52	8.19	95.91	96.97	110.16	22.18	27.79	25.12	15.86	10.81	11.96	9.64	14.01	8.77	183	292	37	74	69	70	122	105	61	23	29	6	170	369	680	69	85	103	91	43	17	23	67	11	Chr01
Glyma.01G234600.Wm82.a2.v1	1.39	0.46	0.91	0	0.77	0.73	0.31	0.57	0.14	0.23	0.22	0	0.27	1.12	1	0.61	0.46	0.12	0.41	0.24	0	0.4	0.4	0	7	3	3	0	3	4	2	6	1	1	1	0	1	9	13	4	3	1	5	2	0	2	4	0	Chr01
Glyma.01G234700.Wm82.a2.v1	15.21	12.17	12.09	17.4	14.36	17.24	6.23	12.96	9.39	4.79	3.85	7.88	14.89	11.49	14.96	10.34	19.41	10.46	6.32	7.47	4.06	6.22	4.83	4.6	44	46	23	36	32	54	23	78	38	12	10	7	32	53	112	39	72	52	44	36	7	18	28	7	Chr01
Glyma.01G234800.Wm82.a2.v1	0.84	0	1.28	2.35	2.19	3.11	0.66	2.43	1.2	0	1.87	0	2.27	0	1.3	1.29	5.91	0.98	2.45	4.55	4.24	2.52	2.1	4.8	1	0	1	2	2	4	1	6	2	0	2	0	2	0	4	2	9	2	7	9	3	3	5	3	Chr01
Glyma.01G234900.Wm82.a2.v1	0	1.26	1.26	0	1.07	0	0	0	0	0	0	0	1.11	0.52	0	0	0	0	0	0	1.39	0	0	0	0	2	1	0	1	0	0	0	0	0	0	0	1	1	0	0	0	0	0	0	1	0	0	0	Chr01
Glyma.01G235000.Wm82.a2.v1	0	0	1.05	0	0	0	0	0.33	0	0.8	0.77	0	0	0	0.27	0	0	0	0	0	0	0	0	0	0	0	1	0	0	0	0	1	0	1	1	0	0	0	1	0	0	0	0	0	0	0	0	0	Chr01
Glyma.01G235100.Wm82.a2.v1	0	1.62	0	0.99	3.66	1.95	0	3.05	1.01	0.81	0.78	0	0	0	0.82	1.08	0.55	1.64	2.34	1.69	2.37	2.82	2.46	2.68	0	3	0	1	4	3	0	9	2	1	1	0	0	0	3	2	1	4	8	4	2	4	7	2	Chr01
Glyma.01G235200.Wm82.a2.v1	8.85	7.37	5.68	5.5	8.93	8.17	3.24	7.56	4.5	0.23	2.62	1.92	10.32	5.43	6.92	7.99	6.6	5.03	4.5	3.89	4.29	1.57	2.06	1.5	45	49	19	20	35	45	21	80	32	1	12	3	39	44	91	53	43	44	55	33	13	8	21	4	Chr01
Glyma.01G235300.Wm82.a2.v1	1.32	1.01	1.61	1.48	1.03	0.73	0	2.41	0.19	0	0.29	0.86	1.78	1.66	1.12	2.23	1.44	0.61	0.88	0.95	0	0.26	0.4	0.5	5	5	4	4	3	3	0	19	1	0	1	1	5	10	11	11	7	4	8	6	0	1	3	1	Chr01
Glyma.01G235400.Wm82.a2.v1	1.12	0	0	0	0	0	0	0	0	0	1.24	0	0	0	0.43	0	0	0	0	0	0	0	0	0	1	0	0	0	0	0	0	0	0	0	1	0	0	0	1	0	0	0	0	0	0	0	0	0	Chr01
Glyma.01G235500.Wm82.a2.v1	0.69	0	0	0	0	0.64	0	0	0	0	0	0	0	0.43	0	0	0.54	0	0	0	0	0	0	0	1	0	0	0	0	1	0	0	0	0	0	0	0	1	0	0	1	0	0	0	0	0	0	0	Chr01
Glyma.01G235600.Wm82.a2.v1	13.98	12.84	8.5	13.68	7.26	6.02	1.83	5.6	1.33	0	1.55	3.04	15.68	10.52	11.71	6.08	6.54	6.51	4.65	4.47	3.91	0.47	2.33	1.77	30	36	12	21	12	14	5	25	4	0	3	2	25	36	65	17	18	24	24	16	5	1	10	2	Chr01
Glyma.01G235700.Wm82.a2.v1	1.97	1.51	0.5	1.83	1.28	1.51	3.08	2.05	0.94	1.14	1.09	1.07	1.77	2.88	1.9	1.01	1.79	2.29	3	1.57	4.41	0.33	0.49	1.25	6	6	1	4	3	5	12	13	4	3	3	1	4	14	15	4	7	12	22	8	8	1	3	2	Chr01
Glyma.01G235900.Wm82.a2.v1	7.65	10.25	12.6	19.61	26.49	29.44	15.49	16.86	21.87	19.89	20.57	8.31	10.3	13.99	12.57	13.69	12.93	11.13	15.91	15.3	18.2	16.57	14.64	13.34	12	21	13	22	32	50	31	55	48	27	29	4	12	35	51	28	26	30	60	40	17	26	46	11	Chr01
Glyma.01G236100.Wm82.a2.v1	5.04	3.58	3.83	6.54	9.34	3.65	2.82	6.92	2.06	1.25	1.6	0	1.94	4.06	2.78	5.52	4.21	3.56	4.64	2.81	1.81	1.08	1.44	2.74	14	13	7	13	20	11	10	40	8	3	4	0	4	18	20	20	15	17	31	13	3	3	8	4	Chr01
Glyma.01G236200.Wm82.a2.v1	0	0.66	0	1.21	0	0	0	1.25	1.24	1	0	0	1.16	1.08	0.33	0	0	0	0	0	0	0	0	1.64	0	1	0	1	0	0	0	3	2	1	0	0	1	2	1	0	0	0	0	0	0	0	0	1	Chr01
Glyma.01G236300.Wm82.a2.v1	2.96	3.59	0.37	3.45	5.44	13.89	1.55	7.47	3	1.99	2.47	0	1.33	1.7	1.72	9.27	8.27	9.9	5.02	5.77	1.66	0.99	1.72	0	12	19	1	10	17	61	8	63	17	7	9	0	4	11	18	49	43	69	49	39	4	4	14	0	Chr01
Glyma.01G236400.Wm82.a2.v1	0.69	0.79	1.4	0.64	0.3	0.53	0.18	0.66	0	0	0.13	0.37	0.31	0.65	1.56	0.88	0.45	0.6	0.53	0.34	0.39	0.11	0.23	0	6	9	8	4	2	5	2	12	0	0	1	1	2	9	35	10	5	9	11	5	2	1	4	0	Chr01
Glyma.01G236500.Wm82.a2.v1	3.49	1.34	0	3.66	0	4.03	3.42	2.1	1.87	1.01	0	0	0	2.74	3.71	1.34	1.36	3.56	1.09	1.05	0	0	0	0	4	2	0	3	0	5	5	5	3	1	0	0	0	5	11	2	2	7	3	2	0	0	0	0	Chr01
Glyma.01G236600.Wm82.a2.v1	73.43	78.32	57.92	103.3	129.29	125.45	93.15	103.48	80.03	68.42	69.94	61.3	67.96	84.32	67.06	95.39	109.54	116.7	82.44	81.24	98.64	40.84	59.09	51.49	160	223	83	161	217	296	259	469	244	129	137	41	110	293	378	271	306	437	432	295	128	89	258	59	Chr01
Glyma.01G236700.Wm82.a2.v1	0.69	0	0	0	0	0	0	0	0	0	0	0	0	0	0	0.53	0	0.4	0	0	0	0	0	0	1	0	0	0	0	0	0	0	0	0	0	0	0	0	0	1	0	1	0	0	0	0	0	0	Chr01
Glyma.01G236800.Wm82.a2.v1	0.66	0.25	2.02	2.32	2.15	3.98	1.3	2.55	1.42	2.68	2.58	2.16	0.45	0.21	0.13	3.56	1.55	2.9	1.79	2.79	4.46	1.99	2.65	0	2	1	4	5	5	13	5	16	6	7	7	2	1	1	1	14	6	15	13	14	8	6	16	0	Chr01
Glyma.01G236900.Wm82.a2.v1	0	0	0	0	0	0	0	0	0	0	0	0	0	0	0	0	0	1.06	0	0	3.07	0.91	0	0	0	0	0	0	0	0	0	0	0	0	0	0	0	0	0	0	0	2	0	0	2	1	0	0	Chr01
Glyma.01G237000.Wm82.a2.v1	0.74	3.96	2.25	0	0	0	0	0	0	0	0	0	5.98	5.1	4.58	0	0	0	0.31	0	0	0	0	0	1	7	2	0	0	0	0	0	0	0	0	0	6	11	16	0	0	0	1	0	0	0	0	0	Chr01
Glyma.01G237200.Wm82.a2.v1	14.84	21.45	27.58	24.21	24.62	17.51	16.48	19.42	14.73	6.67	8.25	13.43	30.53	21.2	21.19	37	27.66	29.27	19.71	14.6	28.38	12.37	16.25	8.62	36	68	44	42	46	46	51	98	50	14	18	10	55	82	133	117	86	122	115	59	41	30	79	11	Chr01
Glyma.01G237300.Wm82.a2.v1	6.75	2.95	5.87	0	0	3.56	2.27	3.71	1.38	0	1.07	3.14	3.89	5.44	4.1	7.4	1.5	1.12	3.21	5.21	0	0.96	2.41	0	7	4	4	0	0	4	3	8	2	0	1	1	3	9	11	10	2	2	8	9	0	1	5	0	Chr01
Glyma.01G237400.Wm82.a2.v1	2.54	1.39	4.97	5.59	3.77	4.03	3.13	2.27	1.3	2.1	2.02	1.18	4.89	4.79	2.11	3.35	6.24	2.54	3.32	2.84	3.05	2.91	2.72	0	7	5	9	11	8	12	11	13	5	5	5	1	10	21	15	12	22	12	22	13	5	8	15	0	Chr01
Glyma.01G237500.Wm82.a2.v1	0.46	0	0	0	0.6	0	0	0	0	0	0	0	0	0	0	0	0	0.27	0.38	0	0	0	0	0	1	0	0	0	1	0	0	0	0	0	0	0	0	0	0	0	0	1	2	0	0	0	0	0	Chr01
Glyma.01G237700.Wm82.a2.v1	0	0	0	0	0	0	0	0	0	0	0	0	0.68	0.32	0.59	0	0	0	0	0	0	0	0	1.92	0	0	0	0	0	0	0	0	0	0	0	0	1	1	3	0	0	0	0	0	0	0	0	2	Chr01
Glyma.01G237800.Wm82.a2.v1	4.25	4.67	4.04	3.34	2.07	1.47	1.67	2.43	3.99	1.84	1.48	4.33	3.93	5.5	4.93	2.65	4.97	4.95	3.31	3.19	1.78	1.06	0.8	1.52	16	23	10	9	6	6	8	19	21	6	5	5	11	33	48	13	24	32	30	20	4	4	6	3	Chr01
Glyma.01G237900.Wm82.a2.v1	12.15	16.14	5.83	20.55	19.09	14.76	16.53	16.6	15.99	4.43	8.53	2.08	8.61	17.24	14.58	10.3	13.46	11.53	7.44	7.29	2.15	4.47	7.98	6.08	19	33	6	23	23	25	33	54	35	6	12	1	10	43	59	21	27	31	28	19	2	7	25	5	Chr01
Glyma.01G238000.Wm82.a2.v1	76.26	72.77	27.28	12.54	11.65	33.97	24.61	28.47	30.14	22.81	22.95	5.85	45.89	36	50.98	31.65	24.49	35.5	31.71	21.53	22.6	11.66	15.22	15.35	85	106	20	10	10	41	35	66	47	22	23	2	38	64	147	46	35	68	85	40	15	13	34	9	Chr01
Glyma.01G238100.Wm82.a2.v1	0	0	0	0	0	0	0	0	0	0	0	0	0	0.26	0	0	0	0	0	0	0	0	0	0	0	0	0	0	0	0	0	0	0	0	0	0	0	1	0	0	0	0	0	0	0	0	0	0	Chr01
Glyma.01G238200.Wm82.a2.v1	2.92	2.64	4.64	2.6	2.76	1.84	1.56	1.85	0.95	0.61	0.74	1.73	1.79	2.66	2.1	1.43	1.45	2.16	1.93	1.51	2.68	0.8	0.99	1.26	22	26	23	14	16	15	15	29	10	4	5	4	10	32	41	14	14	28	35	19	12	6	15	5	Chr01
Glyma.01G238300.Wm82.a2.v1	3.36	3.8	3.33	4.9	3.98	3.77	2.74	3.16	1.36	0.67	1.95	3.33	2.55	2.84	3.05	4.92	3.19	3.82	3.7	2.98	2.45	0.88	2.18	1.94	23	34	15	24	21	28	24	45	13	4	12	7	13	31	54	44	28	45	61	34	10	6	30	7	Chr01
Glyma.01G238400.Wm82.a2.v1	16.59	10.16	12.11	10.2	12.92	6.74	6.24	12.44	9.48	4.6	2.21	6.48	9.83	9.15	11.54	11.2	8.28	15.83	5.79	5.57	8.91	6.63	1.99	6.31	25	20	12	11	15	11	12	39	20	6	3	3	11	22	45	22	16	41	21	14	8	10	6	5	Chr01
Glyma.01G238500.Wm82.a2.v1	1.91	0.37	5.09	2.01	3.72	2.21	2.62	3.68	2.73	0.55	0.53	0	1.29	3.3	2.59	1.1	2.61	3.89	1.39	2.3	6.42	0.96	0.72	0.91	4	1	7	3	6	5	7	16	8	1	1	0	2	11	14	3	7	14	7	8	8	2	3	1	Chr01
Glyma.01G238600.Wm82.a2.v1	0.71	1.09	0.54	6.97	4.16	6.25	13.39	5.31	7.63	12.76	15.84	19.72	3.36	2.9	2.48	6.28	3.06	3.11	5.33	4.49	8.97	12.82	7.46	6.09	2	4	1	14	9	19	48	31	30	31	40	17	7	13	18	23	11	15	36	21	15	36	42	9	Chr01
Glyma.01G238700.Wm82.a2.v1	13.7	11.41	4.29	6.2	6.8	3.35	2.84	7.36	2.3	1.4	1.79	0	9.22	13.14	14.8	4.33	8.8	5.39	4.19	2.42	4.74	1.61	3.02	3.07	34	37	7	11	13	9	9	38	8	3	4	0	17	52	95	14	28	23	25	10	7	4	15	4	Chr01
Glyma.01G238800.Wm82.a2.v1	0.36	0.28	0	3.03	0.47	0	0	0	0	0	0	0	0.97	0.68	0.42	1.11	0.28	0.63	0.15	0.43	1.21	0	0	0	1	1	0	6	1	0	0	0	0	0	0	0	2	3	3	4	1	3	1	2	2	0	0	0	Chr01
Glyma.01G238900.Wm82.a2.v1	8.89	6.8	1.23	1.13	1.05	3.73	1.27	4.27	1.16	0	0	0	13.06	20.78	20.31	8.68	12.61	6.58	1.34	0.97	0	0	0.4	0	11	11	1	1	1	5	2	11	2	0	0	0	12	41	65	14	20	14	4	2	0	0	1	0	Chr01
Glyma.01G239000.Wm82.a2.v1	4.69	3.59	7.49	8.85	8.83	6.5	4.59	4.96	3.02	4.88	3.13	5.35	6.31	4.85	5.53	5.93	6.22	6.14	5.75	3.8	6.3	7.03	4.91	7.13	20	20	21	27	29	30	25	44	18	18	12	7	20	33	61	33	34	45	59	27	16	30	42	16	Chr01
Glyma.01G239200.Wm82.a2.v1	6.04	8.4	8.77	14.97	14.26	9.38	13.12	10.43	11.58	6.66	10.99	8.94	5.91	5.68	3.71	8.42	5.35	7.19	5.14	4.78	5.53	8.23	6.3	5.74	22	40	21	39	40	37	61	79	59	21	36	10	16	33	35	40	25	45	45	29	12	30	46	11	Chr01
Glyma.01G239300.Wm82.a2.v1	1.26	0.32	0.64	2.35	3.28	1.94	0.33	0.61	0.3	0	0	2.74	0.57	1.06	0.98	2.26	4.27	1.22	0.52	1.01	0	0	0	2.4	3	1	1	4	6	5	1	3	1	0	0	2	1	4	6	7	13	5	3	4	0	0	0	3	Chr01
Glyma.01G239400.Wm82.a2.v1	1.23	0	1.88	0	0	0	0	0	0	1.43	0	0	0	0	0	0	0	0	0	0	0	0	0	0	2	0	2	0	0	0	0	0	0	2	0	0	0	0	0	0	0	0	0	0	0	0	0	0	Chr01
Glyma.01G239500.Wm82.a2.v1	39.37	43.2	95.93	128.66	110.85	89.36	128.25	98.52	75.27	123.89	116.61	106.63	33.21	21.12	34.29	62.58	77.33	53.82	51.08	47.25	45.4	45.06	56.58	38.79	83	119	133	194	180	204	345	432	222	226	221	69	52	71	187	172	209	195	259	166	57	95	239	43	Chr01
Glyma.01G239600.Wm82.a2.v1	32.53	42.23	13.78	29.36	14.97	17.49	6.13	15.05	2.35	2.86	2.75	2.68	31.05	26.86	25.79	15.48	14.45	12.7	11.64	5.44	8.3	2.47	4.52	1.57	79	134	22	51	28	46	19	76	8	6	6	2	56	104	162	49	45	53	68	22	12	6	22	2	Chr01
Glyma.01G239700.Wm82.a2.v1	6.61	6.38	4.23	7.29	10.38	6.42	5.18	7.02	5.47	6.03	6.96	13.59	8.42	6.1	8.2	10.93	5.42	9.1	7.37	7.93	7.59	7.65	6.07	4.63	19	24	8	15	23	20	19	42	22	15	18	12	18	28	61	41	20	45	51	38	13	22	35	7	Chr01
Glyma.01G239800.Wm82.a2.v1	0	0	0	0	0	0	0	0	0	0	0	0	0.92	0	0	0	0	0	0	0	0	0	0	0	0	0	0	0	0	0	0	0	0	0	0	0	1	0	0	0	0	0	0	0	0	0	0	0	Chr01
Glyma.01G239900.Wm82.a2.v1	55.89	69.75	18.21	42.79	39.73	54.07	22.94	47.66	26.15	16.15	12.58	8.67	49.26	54.65	49.12	39.29	45.15	38.33	26.28	32.34	17.87	15.3	13.61	11.39	84	137	18	46	46	88	44	149	55	21	17	4	55	131	191	77	87	99	95	81	16	23	41	9	Chr01
Glyma.01G240000.Wm82.a2.v1	133.92	152.35	67.87	112.33	147.19	187.14	146.92	172.12	120.59	99.04	106.26	52.35	134.61	134.35	119.4	121.88	159.47	189.08	148.48	144.65	134.91	66.05	92.22	73.01	150	223	50	90	127	227	210	401	189	96	107	18	112	240	346	178	229	364	400	270	90	74	207	43	Chr01
Glyma.01G240100.Wm82.a2.v1	0.21	0.32	0	0.87	0.81	0.38	0	0.5	0	0	0	0	0	0	0.16	0.16	0.32	0.24	0.17	0.37	0	0	0	0	1	2	0	3	3	2	0	5	0	0	0	0	0	0	2	1	2	2	2	3	0	0	0	0	Chr01
Glyma.01G240300.Wm82.a2.v1	0	0	0	3.74	1.49	1.06	0.9	1.29	1.37	0	0.42	1.24	0	0.24	0	9.08	2.38	5.11	3.49	2.98	3.85	2.29	2.1	4.36	0	0	0	7	3	3	3	7	5	0	1	1	0	1	0	31	8	23	22	13	6	6	11	6	Chr01
Glyma.01G240500.Wm82.a2.v1	5.1	2.1	1.19	16.47	9.18	7.61	1.85	8.68	0.56	0	0.44	2.56	5.81	6.4	6.68	6.93	12.25	8.45	3.1	2.59	1.98	1.57	0.2	0.75	13	7	2	30	18	21	6	46	2	0	1	2	11	26	44	23	40	37	19	11	3	4	1	1	Chr01
Glyma.01G240700.Wm82.a2.v1	5.15	5.73	4.98	5.24	12.16	6.49	5.14	3.38	6.02	1.08	1.56	6.1	6.93	3.52	1.81	7.54	9.5	5.72	5.65	3.37	10.22	3.75	5.14	2.67	11	16	7	8	20	15	14	15	18	2	3	4	11	12	10	21	26	21	29	12	13	8	22	3	Chr01
Glyma.01G240800.Wm82.a2.v1	0	0.25	0	0	0	0	0	0	0	0	0	0	0	0	0	0	0	0	0	0	0	0	0	0	0	1	0	0	0	0	0	0	0	0	0	0	0	0	0	0	0	0	0	0	0	0	0	0	Chr01
Glyma.01G241000.Wm82.a2.v1	8.52	15.07	27.93	10.79	6.91	3.69	2.92	6.4	3.04	2.46	2.37	3.47	18.63	13.69	14.92	8.57	4.98	4.18	4.98	4.79	5.81	2.93	2.66	4.56	32	74	69	29	20	15	14	50	16	8	8	4	52	82	145	42	24	27	45	30	13	11	20	9	Chr01
Glyma.01G241200.Wm82.a2.v1	11.1	12.14	6.63	11.64	7.72	9.15	9.32	8.39	3.68	2.75	4.85	2.58	20.28	20.88	17.62	5.17	4.33	8.54	5.11	2.62	6.66	1.19	3.56	0	28	40	11	21	15	25	30	44	13	6	11	2	38	84	115	17	14	37	31	11	10	3	18	0	Chr01
Glyma.01G241300.Wm82.a2.v1	1.53	1.17	1.36	1.76	1.28	1.74	0.7	1.6	0.77	1.04	0.7	0.88	2.42	2.36	1.94	1.58	1.12	1.67	1.98	1.56	0.75	0.81	1.03	1.88	17	17	10	14	11	21	10	37	12	10	7	3	20	42	56	23	16	32	53	29	5	9	23	11	Chr01
Glyma.01G241400.Wm82.a2.v1	3.95	0.5	2	0	0.86	0.61	3.1	1.58	0.94	0.76	0.73	0	1.77	3.3	2.55	2.02	0	2.3	1.92	1.58	2.21	0.66	1.31	1.25	6	1	2	0	1	1	6	5	2	1	1	0	2	8	10	4	0	6	7	4	2	1	4	1	Chr01
Glyma.01G241500.Wm82.a2.v1	0.38	0	0.58	0	1.49	0.35	0.3	0	0	0	0	0	0.51	1.2	0.59	0.59	0	0	0	0	0	0	0.19	0	1	0	1	0	3	1	1	0	0	0	0	0	1	5	4	2	0	0	0	0	0	0	1	0	Chr01
Glyma.01G241600.Wm82.a2.v1	21.94	25.19	44.49	27.27	30.07	37.15	24.84	38.1	26.14	28.17	39.32	27.8	26.26	22.93	18.85	35.53	20.92	30.5	30.41	24.87	12.28	12.19	21.29	13.91	18	27	24	16	19	33	26	65	30	20	29	7	16	30	40	38	22	43	60	34	6	10	35	6	Chr01
Glyma.01G241700.Wm82.a2.v1	2.42	4.63	3.68	1.69	0	1.12	5.68	3.49	0.86	2.79	1.34	0	6.51	12.89	12.62	0	0	2.11	1.01	0	0	0	1.21	0	2	5	2	1	0	1	6	6	1	2	1	0	4	17	27	0	0	3	2	0	0	0	2	0	Chr01
Glyma.01G242000.Wm82.a2.v1	69.34	46.74	256.27	129.69	90.62	69.97	53.98	81.91	69.58	53.6	55.17	46.38	40.18	37.43	49.7	69.04	60.18	60.12	66.45	64.48	64	72.09	76.54	75.98	151	133	367	202	152	165	150	371	212	101	108	31	65	130	280	196	168	225	348	234	83	157	334	87	Chr01
Glyma.01G242100.Wm82.a2.v1	0	0.47	0	5.11	9.5	0.56	1.43	0.88	0.87	2.11	2.03	3.97	3.28	0.76	0	0.47	2.38	0	1.27	1.1	0	1.83	1.22	2.32	0	1	0	6	12	1	3	3	2	3	3	2	4	2	0	1	5	0	5	3	0	3	4	2	Chr01
Glyma.01G242200.Wm82.a2.v1	227.03	163.83	199.85	69.6	82.73	120.46	47.6	91.44	61.91	18.41	12.18	22.71	297.58	270.35	407.21	208.49	139.03	151.8	103.09	95.6	85.27	26.88	43.23	34.09	228	215	132	50	64	131	61	191	87	16	11	7	222	433	1058	273	179	262	249	160	51	27	87	18	Chr01
Glyma.01G242300.Wm82.a2.v1	5.11	5	9.07	5.56	11.43	9.44	3.12	5.87	7.11	2.63	3.16	3.7	6.12	6.41	6.26	5.45	6.43	6.28	6.73	6.65	5.25	5.68	4.25	5.4	18	23	21	14	31	36	14	43	35	8	10	4	16	36	57	25	29	38	57	39	11	20	30	10	Chr01
Glyma.01G242500.Wm82.a2.v1	10.65	2.61	6.48	11.92	11.07	9.84	7.68	10.24	10.05	6.4	9.48	5.55	10.9	4.28	6.59	9.81	10.64	11.9	11.87	6.9	10.02	5.97	9.36	8.1	25	8	10	20	20	25	23	50	33	13	20	4	19	16	40	30	32	48	67	27	14	14	44	10	Chr01
Glyma.01G242700.Wm82.a2.v1	0.92	0	0	0	0	0	0	0	0	0	0	0	0	0	1.07	0	0	0	0	0	0	0	0	0	1	0	0	0	0	0	0	0	0	0	0	0	0	0	3	0	0	0	0	0	0	0	0	0	Chr01
Glyma.01G242800.Wm82.a2.v1	45.11	47.92	82.12	29.87	43.15	47.13	70	57.64	79.96	53.5	48.52	63.81	46.74	37.4	51.39	58.49	47.68	51.63	74.15	64.64	93.17	64.68	69.45	66.59	152	211	182	72	112	172	301	404	377	156	147	66	117	201	448	257	206	299	601	363	187	218	469	118	Chr01
Glyma.01G242900.Wm82.a2.v1	369.87	401.35	246.97	366.6	439.52	375.89	216.23	322.71	331.48	151.52	137.14	127.51	268.71	332.54	303.33	376.74	425.87	397.39	284.78	274.79	351.59	136.96	205.08	200.97	189	268	83	134	173	208	141	343	237	67	63	20	102	271	401	251	279	349	350	234	107	70	210	54	Chr01
Glyma.01G243000.Wm82.a2.v1	9.54	9.73	4.84	8.89	3.1	15.42	10.59	16.05	7.39	4.59	10.61	0	10.7	16.95	16.6	10.37	17.98	11.1	14.88	11.45	6.67	2.38	5.16	4.54	12	16	4	8	3	21	17	42	13	5	12	0	10	34	54	17	29	24	45	24	5	3	13	3	Chr01
Glyma.01G243100.Wm82.a2.v1	3.47	2.95	2.93	2.69	2	1.78	4.53	3.52	1.93	0.89	0.43	1.26	3.63	5.56	3.87	2.36	1.5	3.14	2.08	0.69	1.94	2.31	0.96	0	9	10	5	5	4	5	15	19	7	2	1	1	7	23	26	8	5	14	13	3	3	6	5	0	Chr01
Glyma.01G243200.Wm82.a2.v1	5.97	3.74	0.82	39.43	42.95	22.54	4.25	14.6	8.14	0.63	2.41	0	7.3	4.76	2.1	49.92	33.85	17.99	13.31	9.44	4.55	1.08	2.44	2.06	11	9	1	52	61	45	10	56	21	1	4	0	10	14	10	120	80	57	59	29	5	2	9	2	Chr01
Glyma.01G243300.Wm82.a2.v1	47.82	54.27	31.34	38.04	34.25	78.43	29.08	59.07	31.23	20.01	19.26	10.75	24.42	34.64	36.02	44.27	55.95	57.57	42.17	37.11	16.61	18.96	14.81	29.79	58	86	25	33	32	103	45	149	53	21	21	4	22	67	113	70	87	120	123	75	12	23	36	19	Chr01
Glyma.01G243400.Wm82.a2.v1	1175.06	602.1	248.21	60.65	60.14	98.46	218.97	150.6	193.92	42.49	58.07	47.91	863.18	827.18	1311.14	82.34	61.37	145.9	167.24	197.68	162.98	51.46	97.61	83.9	1598	1070	222	59	63	145	380	426	369	50	71	20	872	1794	4613	146	107	341	547	448	132	70	266	60	Chr01
Glyma.01G243500.Wm82.a2.v1	2.66	1.02	0	0	0	1.23	1.04	0.64	1.9	1.54	0	0	7.16	3.33	8.22	0	0	3.09	1.66	1.6	0	0	0.66	2.53	2	1	0	0	0	1	1	1	2	1	0	0	4	4	16	0	0	4	3	2	0	0	1	1	Chr01
Glyma.01G243600.Wm82.a2.v1	7.86	6.01	13.88	4.25	10.53	3.75	6.16	5.12	6.88	3.81	2.26	4.13	7.51	4.61	5.78	5.64	4.35	4.13	4.32	4.26	6.38	4.31	3.67	6.27	31	31	36	12	32	16	31	42	38	13	8	5	22	29	59	29	22	28	41	28	15	17	29	13	Chr01
Glyma.01G243800.Wm82.a2.v1	72.79	60.28	53.06	39.03	69.9	58.93	32.82	37.87	49.88	13.83	19.96	29.24	89.93	61.9	67.45	78.77	57.55	40.61	30.68	21.54	33.48	8.97	30.85	22.75	73	79	35	28	54	64	42	79	70	12	18	9	67	99	175	103	74	70	74	36	20	9	62	12	Chr01
Glyma.01G243900.Wm82.a2.v1	1.55	0.79	0.26	2.16	1.79	1.91	0.94	1.82	0.86	1.19	1.53	0.56	1.16	0.75	0.66	0.53	0.54	1	1.86	0.72	0.87	1.2	0.43	0	9	6	1	9	8	12	7	22	7	6	8	1	5	7	10	4	4	10	26	7	3	7	5	0	Chr01
Glyma.01G244300.Wm82.a2.v1	0	1.05	1.4	3.85	4.17	0.42	2.52	5.3	0	3.71	0	0	3.09	1.73	3.02	2.11	4.65	3.2	1.91	3.03	0	0.92	0.92	0.87	0	3	2	6	7	1	7	24	0	7	0	0	5	6	17	6	13	12	10	11	0	2	4	1	Chr01
Glyma.01G244400.Wm82.a2.v1	1.8	1.75	0.25	1.83	2.54	1.81	1.66	1.33	1.28	0.75	0.54	1.06	5.28	2.36	2.15	4.88	2.42	3.04	1.49	1.86	3.02	0.16	0.98	0.62	11	14	1	8	12	12	13	17	11	4	3	2	24	23	34	39	19	32	22	19	11	1	12	2	Chr01
Glyma.01G244500.Wm82.a2.v1	3.98	7.23	6.05	12.52	10.33	16.08	24.17	8.13	19.2	20.12	22.14	24.31	6.7	5.93	5.77	16.03	10.87	11	13.03	26.87	24.23	36.31	41.46	35.95	8	19	8	18	16	35	62	34	54	35	40	15	10	19	30	42	28	38	63	90	29	73	167	38	Chr01
Glyma.01G244600.Wm82.a2.v1	3.74	0	0.63	0	0	0.77	0	0	0	0	0	0	0.56	0.52	2.89	0	0.32	0	0	0	0	0	0.41	0	9	0	1	0	0	2	0	0	0	0	0	0	1	2	18	0	1	0	0	0	0	0	2	0	Chr01
Glyma.01G244700.Wm82.a2.v1	1.31	2.81	0.4	2.2	4.43	5.33	0.21	2.14	0.56	0	0	0	2.12	2.14	1.42	1.61	4.09	1.53	0.76	0.31	0.44	0.26	0	1	5	14	1	6	13	22	1	17	3	0	0	0	6	13	14	8	20	10	7	2	1	1	0	2	Chr01
Glyma.01G244800.Wm82.a2.v1	0	0	0	0.72	0.67	0.48	10.1	1.98	2.95	8.93	14.33	8.39	0	0.32	0	0.4	0.4	0.3	1.07	1.55	1.73	1.55	4.11	2.94	0	0	0	1	1	1	25	8	8	15	25	5	0	1	0	1	1	1	5	5	2	3	16	3	Chr01
Glyma.01G244900.Wm82.a2.v1	13.54	7.53	11.54	10.9	9.59	12.5	5.79	12.33	5.72	2.61	4.33	1.34	11.87	10.67	13.08	6.45	8	8.95	6.65	3.82	4.13	1.64	2.97	2.73	66	48	37	38	36	66	36	125	39	11	19	2	43	83	165	41	50	75	78	31	12	8	29	7	Chr01
Glyma.01G245100.Wm82.a2.v1	10.19	12.22	4.61	7.7	8.22	12.71	7.34	8.21	5.71	3.82	3.06	7.18	14.46	10.71	8.62	11.19	11.38	10.74	7.1	8.1	11.1	3.85	4.12	5.76	37	58	11	20	23	50	34	62	29	12	10	8	39	62	81	53	53	67	62	49	24	14	30	11	Chr01
Glyma.01G245200.Wm82.a2.v1	2.9	4.2	4.87	2.35	5.54	4.51	2.63	3.52	3.71	1.94	2.88	3.98	3.7	2.49	3.07	5.03	6.19	3.99	2.98	3.39	2.82	2.44	1.75	3.48	19	36	21	11	28	32	22	48	34	11	17	8	18	26	52	43	52	45	47	37	11	16	23	12	Chr01
Glyma.01G245300.Wm82.a2.v1	0.75	0.57	0	1.05	0.49	1.04	0.59	0.36	0.27	0.43	0.42	1.22	0	0.47	0.44	0	1.76	0.22	0	0.23	0	0	0	0	2	2	0	2	1	3	2	2	1	1	1	1	0	2	3	0	6	1	0	1	0	0	0	0	Chr01
Glyma.01G245400.Wm82.a2.v1	9.43	13.19	11.06	9.79	10.84	7.46	7.81	8.68	8.09	3.42	4.79	6.14	7.98	9.97	11.14	7.85	6.72	6.74	6.05	5.01	5.43	3.5	4.44	3.07	35	64	27	26	31	30	37	67	42	11	16	7	22	59	107	38	32	43	54	31	12	13	33	6	Chr01
Glyma.01G245500.Wm82.a2.v1	29.59	26.32	15.81	16.77	22.33	18.83	13.48	14.8	19.72	1.85	7.56	9.12	37.69	34.1	39.73	23.62	18.72	20.94	16.96	12.24	18.13	4.4	6.59	11.41	74	86	26	30	43	51	43	77	69	4	17	7	70	136	257	77	60	90	102	51	27	11	33	15	Chr01
Glyma.01G245700.Wm82.a2.v1	0	0	0	0	0	0	0.33	0.21	0	0.49	0	1.39	0	0	0	0	0.33	0.25	0	0.26	0	0	0	0	0	0	0	0	0	0	1	1	0	1	0	1	0	0	0	0	1	1	0	1	0	0	0	0	Chr01
Glyma.02G000100.Wm82.a2.v1	0.23	1.03	0.34	0.94	0.15	1.04	0.09	0.16	0.64	0.26	0	0	0.3	0.35	0.65	0.17	0.79	0.26	0.28	0.2	0.38	0.34	0.11	0	2	12	2	6	1	10	1	3	8	2	0	0	2	5	15	2	9	4	6	3	2	3	2	0	Chr02
Glyma.02G000200.Wm82.a2.v1	45.42	61.03	54.74	81.38	64.21	59.66	49.57	49.18	54.11	33.44	42.29	46.04	42.58	29.75	41.62	45.16	54.33	44.05	38.89	40.58	34.46	29.6	29.55	21.76	135	237	107	173	147	192	188	304	225	86	113	42	94	141	320	175	207	225	278	201	61	88	176	34	Chr02
Glyma.02G000400.Wm82.a2.v1	2.37	2.72	8.1	5.79	2.69	0.27	0.93	1.28	0.63	0.34	1.32	0.96	0.8	3.89	4.12	0.45	0.69	0.69	0.86	0.18	0.5	0.59	0.74	0.56	8	12	18	14	7	1	4	9	3	1	4	1	2	21	36	2	3	4	7	1	1	2	5	1	Chr02
Glyma.02G000500.Wm82.a2.v1	13.3	12.11	1.93	1.77	5.75	4.09	0.5	4.26	1.81	1.46	1.41	0	17.05	26.2	26.92	0.97	3.95	4.05	4.21	3.42	4.25	2.53	2.53	1.2	21	25	2	2	7	7	1	14	4	2	2	0	20	66	110	2	8	11	16	9	4	4	8	1	Chr02
Glyma.02G000600.Wm82.a2.v1	11.58	11.39	7.55	7.86	13.32	15.89	8.04	11.29	7.33	3.06	3.68	0	8.02	14.11	8.82	10.15	12.13	10.01	7.98	6.35	5.56	1.98	2.81	3.78	35	45	15	17	31	52	31	71	31	8	10	0	18	68	69	40	47	52	58	32	10	6	17	6	Chr02
Glyma.02G000700.Wm82.a2.v1	28.63	32.98	6.55	7.75	11.19	4.55	0.48	5.62	1.54	1.42	2.4	1	38.95	29.34	27.6	5.19	3.84	3.76	2.43	1.11	0.52	2.46	0.31	2.93	93	140	14	18	28	16	2	38	7	4	7	1	94	152	232	22	16	21	19	6	1	8	2	5	Chr02
Glyma.02G000900.Wm82.a2.v1	106.84	95.29	70.58	43.26	73.65	97.3	43.3	61.64	46.34	24.69	41.8	16.8	89.27	76.69	89.43	72.33	82.18	76.74	57.9	41.56	34.64	21.36	33.09	21.02	145	169	63	42	77	143	75	174	88	29	51	7	90	166	314	128	143	179	189	94	28	29	90	15	Chr02
Glyma.02G001000.Wm82.a2.v1	0.63	0.64	0.32	0.58	1.09	0.19	0	0.1	0	0	0.23	0	0.84	0.13	0.73	0	0.82	0.36	0.43	0.13	0	0	0	0	3	4	1	2	4	1	0	1	0	0	1	0	3	1	9	0	5	3	5	1	0	0	0	0	Chr02
Glyma.02G001100.Wm82.a2.v1	29.56	32.1	29.76	3.91	5.19	2.95	3.44	5.38	3.43	2.31	1.33	2.6	31.73	26.8	23.78	7.05	8.72	5.35	2.82	5.51	5.37	1.2	4.78	1.52	74	105	49	7	10	8	11	28	12	5	3	2	59	107	154	23	28	23	17	23	8	3	24	2	Chr02
Glyma.02G001200.Wm82.a2.v1	3.1	1.42	2.36	3.9	8.86	8.31	2.67	5.07	2.66	2.87	1.73	1.01	1.67	3.89	1.2	2.86	1.94	2.71	2.45	2.98	0	1.24	1.24	0.59	10	6	5	9	22	29	11	34	12	8	5	1	4	20	10	12	8	15	19	16	0	4	8	1	Chr02
Glyma.02G001300.Wm82.a2.v1	138.68	103.47	103.68	58.16	87.02	69.37	59.77	64.45	51.21	41.4	55.28	30.12	101.12	131.89	167.07	54.07	83.83	73.97	55.74	65.19	58.21	45.06	43.83	43.96	120	117	59	36	58	65	66	116	62	31	43	8	65	182	374	61	93	110	116	94	30	39	76	20	Chr02
Glyma.02G001400.Wm82.a2.v1	0	0.15	0	0	0.26	0	0	0.09	0.14	0.23	0	0.64	0	0.12	0	0.15	0.31	0.34	0.08	0.35	0	0.2	0.2	0	0	1	0	0	1	0	0	1	1	1	0	1	0	1	0	1	2	3	1	3	0	1	2	0	Chr02
Glyma.02G001500.Wm82.a2.v1	3.27	0.84	1.66	0	0	0	0	0	0	0	0	0	2.94	2.05	4.22	0	0	0	0	0	0	0	0	0	9	3	3	0	0	0	0	0	0	0	0	0	6	9	30	0	0	0	0	0	0	0	0	0	Chr02
Glyma.02G001600.Wm82.a2.v1	7.9	6.95	4.8	7.73	12.31	9.48	5.26	10.44	7.34	5.48	4.39	1.29	8.51	10.65	8.24	11.21	12.02	8.5	6.57	7.35	4.64	4.74	5.52	3.76	20	23	8	14	24	26	17	55	26	12	10	1	16	43	54	37	39	37	40	31	7	12	28	5	Chr02
Glyma.02G001700.Wm82.a2.v1	8.57	4.99	19.23	3.99	3.71	4.14	3.52	4.31	2.62	0.47	0.91	1.33	8.24	12.02	13.72	3.13	7.32	5.46	3.39	3.43	1.37	2.04	1.63	1.55	21	16	31	7	7	11	11	22	9	1	2	1	15	47	87	10	23	23	20	14	2	5	8	2	Chr02
Glyma.02G001800.Wm82.a2.v1	0	0.59	0	7.49	0.99	2.12	8.4	17.29	15.31	33.6	29.79	29.92	0	0.96	0.89	1.76	1.19	2.23	17.82	15.61	14.13	36.72	21.77	20.37	0	1	0	7	1	3	14	47	28	38	35	12	0	2	3	3	2	5	56	34	11	48	57	14	Chr02
Glyma.02G001900.Wm82.a2.v1	11.26	15.29	18.23	10.67	13.21	14.43	10.53	17.99	14.54	7.98	4.85	10.65	21.03	14.58	18.11	18.11	13.89	15.43	13.9	10.68	12.81	8.35	7.61	4.84	31	55	33	21	28	43	37	103	56	19	12	9	43	64	129	65	49	73	92	49	21	23	42	7	Chr02
Glyma.02G002000.Wm82.a2.v1	2.54	4.61	3.37	6.2	3.29	3.81	0.5	3.81	2.04	1.1	0.71	0	2.56	4.77	2.08	2.67	2.23	2.21	1.58	0.95	0.53	0.63	0.79	1.21	8	19	7	14	8	13	2	25	9	3	2	0	6	24	17	11	9	12	12	5	1	2	5	2	Chr02
Glyma.02G002100.Wm82.a2.v1	0	0	0	0	0	0	0	0	0	0	0	0	0	0	0.27	0	0.54	0	0	0.41	0	0	0	0	0	0	0	0	0	0	0	0	0	0	0	0	0	0	1	0	1	0	0	1	0	0	0	0	Chr02
Glyma.02G002200.Wm82.a2.v1	0	0.11	0	0	0	0	0	0	0	0.17	0	0	0	0	0.06	0	0	0.09	0	0.09	0	0	0	0	0	1	0	0	0	0	0	0	0	1	0	0	0	0	1	0	0	1	0	1	0	0	0	0	Chr02
Glyma.02G002300.Wm82.a2.v1	155.6	196.2	126.41	179.86	257.47	242.33	158.33	174.4	217.76	110.57	100.23	149.8	168.82	140.38	132.49	283.56	279.32	234.85	177.47	165.56	238.64	98.45	144.63	109.53	335	552	179	277	427	565	435	781	656	206	194	99	270	482	738	796	771	869	919	594	306	212	624	124	Chr02
Glyma.02G002500.Wm82.a2.v1	6.85	7.37	12.95	2.33	4.81	4.79	1.89	5.61	3.71	1.71	1.85	6.03	7.73	5.92	5.44	10.65	9.24	6.14	3.39	4.56	4.97	5	2.31	5.63	37	52	46	9	20	28	13	63	28	8	9	10	31	51	76	75	64	57	44	41	16	27	25	16	Chr02
Glyma.02G002600.Wm82.a2.v1	0	1.05	0	0	0	0	0	0	0	0	0	0	0	0	0.26	0	0	0.4	0.28	0	0	0	0	0	0	2	0	0	0	0	0	0	0	0	0	0	0	0	1	0	0	1	1	0	0	0	0	0	Chr02
Glyma.02G002700.Wm82.a2.v1	0	0	0	0	0	0	0	0.3	0	0	0	0	0	0	0	0.24	0	0	0	0	0	0	0.16	0	0	0	0	0	0	0	0	2	0	0	0	0	0	0	0	1	0	0	0	0	0	0	1	0	Chr02
Glyma.02G002800.Wm82.a2.v1	111.6	138.15	146.16	161.26	186.28	207.42	153.6	167.73	152.49	136.01	126.75	122.21	108.58	102.32	80.11	201.05	220.92	174.07	163.77	168.55	161.41	144.87	136.43	107.9	238	385	205	246	306	479	418	744	455	251	243	80	172	348	442	559	604	638	840	599	205	309	583	121	Chr02
Glyma.02G002900.Wm82.a2.v1	13.48	10.72	2.41	9.61	6.86	8.06	4.35	12.84	3.78	2.44	3.82	0.86	13.88	26.36	26.26	8.31	7.01	9.54	7.36	5.87	7.1	2.64	2.77	1.51	51	53	6	26	20	33	21	101	20	8	13	1	39	159	257	41	34	62	67	37	16	10	21	3	Chr02
Glyma.02G003000.Wm82.a2.v1	0	0	4.92	1.81	0.84	2.99	0	0.62	0.93	0	0.72	0	0	2.03	1.75	0.99	0	0.75	0.27	0	1.09	1.3	0.32	1.23	0	0	5	2	1	5	0	2	2	0	1	0	0	5	7	2	0	2	1	0	1	2	1	1	Chr02
Glyma.02G003100.Wm82.a2.v1	2.11	1.13	3.54	2.66	4.67	3.91	3.48	3.56	3.93	0.98	1.18	0.69	1.99	4.24	1.8	4.54	1.81	3.57	2.9	3.05	2.13	0.85	0.95	1.61	10	7	11	9	17	20	21	35	26	4	5	1	7	32	22	28	11	29	33	24	6	4	9	4	Chr02
Glyma.02G003200.Wm82.a2.v1	2.85	0.73	3.61	2.66	1.23	2.63	0.93	2.06	1.19	0.55	0.79	0	0.32	1.34	2.75	1.82	0.93	1.93	1.78	2.57	0.8	0.24	1.07	1.81	12	4	10	8	4	12	5	18	7	2	3	0	1	9	30	10	5	14	18	18	2	1	9	4	Chr02
Glyma.02G003300.Wm82.a2.v1	35.12	37.17	25.95	27.07	39.2	31.22	17.75	28.56	15.95	14.41	11.32	16.04	40.65	35.19	41.23	40.78	43.01	32.85	25.38	25.41	24.8	15.09	15.07	13.11	107	148	52	59	92	103	69	181	68	38	31	15	92	171	325	162	168	172	186	129	45	46	92	21	Chr02
Glyma.02G003400.Wm82.a2.v1	1.26	1.92	0	0	0	0	0	0.15	0	0	0	0	0.84	3.34	1.82	0	0	0	0	0	0	0	0	0	4	8	0	0	0	0	0	1	0	0	0	0	2	17	15	0	0	0	0	0	0	0	0	0	Chr02
Glyma.02G003500.Wm82.a2.v1	1.54	0.59	1.17	1.08	1	1.78	0.6	0.37	0.82	0	0	0	1.55	1.21	1.19	0.59	0.3	0.9	0.48	0	0	0	0	0.73	4	2	2	2	2	5	2	2	3	0	0	0	3	5	8	2	1	4	3	0	0	0	0	1	Chr02
Glyma.02G003600.Wm82.a2.v1	0.26	0.6	1.2	0.73	0	0.73	0.21	0.76	0.19	0.3	0	0.86	0	0.16	0.2	0.2	0	0	0.22	0.47	0	0.26	0.26	1	1	3	3	2	0	3	1	6	1	1	0	1	0	1	2	1	0	0	2	3	0	1	2	2	Chr02
Glyma.02G003700.Wm82.a2.v1	0	0	0	0	0	0	0	0	0	0	0	0	0	0	0	0	0	0.16	0	0	0	0	0	0	0	0	0	0	0	0	0	0	0	0	0	0	0	0	0	0	0	1	0	0	0	0	0	0	Chr02
Glyma.02G003800.Wm82.a2.v1	1.75	1.78	0	1.22	1.89	2.96	1.14	1.26	0.62	0	0.32	0	0	0.73	0.23	2.46	2.5	1.36	1.09	1.22	1.96	1.46	0.29	0.55	6	8	0	3	5	11	5	9	3	0	1	0	0	4	2	11	11	8	9	7	4	5	2	1	Chr02
Glyma.02G003900.Wm82.a2.v1	0	0	0	0	0	0	0	0	0	0	0	0	0	0	0	0.4	0	0	0	0	0	0	0	0	0	0	0	0	0	0	0	0	0	0	0	0	0	0	0	1	0	0	0	0	0	0	0	0	Chr02
Glyma.02G004000.Wm82.a2.v1	20.98	14.27	9.45	23.9	18.16	19.01	12.18	18.12	9.72	7.63	5.19	1.27	21.97	22.65	20.72	20.56	22.12	19.89	15.02	12.82	11.09	6.99	9.89	7.39	54	48	16	44	36	53	40	97	35	17	12	1	42	93	138	69	73	88	93	55	17	18	51	10	Chr02
Glyma.02G004100.Wm82.a2.v1	145.93	197.04	151.75	172.36	264.58	241.64	197.17	218.14	285.92	165.73	155.8	232.25	154.68	144.09	107.63	297.83	284.57	261.57	201.21	210.87	280.24	114.88	194.2	129.19	174	307	119	147	243	312	300	541	477	171	167	85	137	274	332	463	435	536	577	419	199	137	464	81	Chr02
Glyma.02G004200.Wm82.a2.v1	0.64	2.22	2.45	1.57	1.67	1.19	0.38	1.62	1.15	0.37	0.54	0	2.17	1.31	1.87	1.73	1.38	0.56	0.47	0.39	1.08	0.48	0.56	0.31	4	18	10	7	8	8	3	21	10	2	3	0	10	13	30	14	11	6	7	4	4	3	7	1	Chr02
Glyma.02G004400.Wm82.a2.v1	11.87	15.52	13.53	7.6	14.12	8.22	6.98	13.31	7.78	5.71	6.05	11.28	9.32	15.19	8.98	17.45	13.5	12.37	8.64	8.31	8.3	10.88	7.4	4.7	24	41	18	11	22	18	18	56	22	10	11	7	14	49	47	46	35	43	42	28	10	22	30	5	Chr02
Glyma.02G004500.Wm82.a2.v1	0	0	0	8.36	0	1.84	0	0	2.85	0	0	0	0	5	2.31	0	0	3.48	1.66	2.39	0	0	1	0	0	0	0	3	0	1	0	0	2	0	0	0	0	4	3	0	0	3	2	2	0	0	1	0	Chr02
Glyma.02G004600.Wm82.a2.v1	2.06	1.18	0	7.2	6.02	2.38	0.81	1.73	2.21	0	0	0	2.08	1.29	2.39	3.56	1.61	2.4	1.29	1.24	0	0.52	0.26	0	4	3	0	10	9	5	2	7	6	0	0	0	3	4	12	9	4	8	6	4	0	1	1	0	Chr02
Glyma.02G004800.Wm82.a2.v1	2.64	3.03	4.01	13.83	15.41	16.44	9.3	22.51	1.88	0.76	1.47	0	7.1	6.2	3.31	12.64	18	19.95	16.45	10.29	8.86	3.96	2.63	0	4	6	4	15	18	27	18	71	4	1	2	0	8	15	13	25	35	52	60	26	8	6	8	0	Chr02
Glyma.02G004900.Wm82.a2.v1	0.83	0	0	2.32	4.32	2.3	0.65	3.6	0.59	0	0	0	0	0.52	0.64	4.46	1.3	2.42	3.8	0.5	0	0	0	0	1	0	0	2	4	3	1	9	1	0	0	0	0	1	2	7	2	5	11	1	0	0	0	0	Chr02
Glyma.02G005000.Wm82.a2.v1	10.55	10.95	4.01	8.43	9.29	10.09	5.02	8.33	10.23	2.61	5.87	7.36	12.17	5.43	10.78	14.74	14.69	9.21	8.93	7.46	15.18	4.52	6.77	7.88	28	38	7	16	19	29	17	46	38	6	14	6	24	23	74	51	50	42	57	33	24	12	36	11	Chr02
Glyma.02G005100.Wm82.a2.v1	3.7	1.03	2.56	6.12	3.06	1.24	0.53	1.94	0.48	0	0.37	0	3.17	3.16	2.6	1.81	1.31	0.78	0.84	0.61	0.56	0	0.34	0	11	4	5	13	7	4	2	12	2	0	1	0	7	15	20	7	5	4	6	3	1	0	2	0	Chr02
Glyma.02G005200.Wm82.a2.v1	5.57	6.75	2.82	5.19	3.62	10.29	2.55	5.36	4.65	2.68	4.13	4.54	8.75	5.24	7.54	7.12	3.99	7.03	5.02	3.62	3.12	2.32	2.78	4.42	12	19	4	8	6	24	7	24	14	5	8	3	14	18	42	20	11	26	26	13	4	5	12	5	Chr02
Glyma.02G005300.Wm82.a2.v1	0	0.15	0.3	0.28	0	0	0	0	0	0	0	0	0	0.12	0	0.15	0	0.12	0	0.12	0	0	0	0	0	1	1	1	0	0	0	0	0	0	0	0	0	1	0	1	0	1	0	1	0	0	0	0	Chr02
Glyma.02G005400.Wm82.a2.v1	0	0	1.82	1.67	0	0	0	0	0	0	0	0	0	1.88	0.23	0.92	0	0	0	0	0	0	0	0	0	0	2	2	0	0	0	0	0	0	0	0	0	5	1	2	0	0	0	0	0	0	0	0	Chr02
Glyma.02G005500.Wm82.a2.v1	392.74	327.54	135.39	316.32	373.6	445.3	248.78	327.59	247.49	153.6	181.82	149.95	366.56	398.93	341.02	351.37	405.99	398.47	272.75	246.51	232.57	137.62	164.43	159.52	913	995	207	526	669	1121	738	1584	805	309	380	107	633	1479	2051	1065	1210	1592	1525	955	322	320	766	195	Chr02
Glyma.02G005600.Wm82.a2.v1	0	0	0	0	0	0	0	1.14	0.34	0	0	0	0	0.3	0.37	0	0.74	0.83	0	0	0.8	0	0	0	0	0	0	0	0	0	0	5	1	0	0	0	0	1	2	0	2	3	0	0	1	0	0	0	Chr02
Glyma.02G005700.Wm82.a2.v1	1.5	1.91	3.42	0.35	0.97	2.54	1.17	1.68	2.5	3.18	1.94	3.25	0.34	1.25	2.41	2.87	2.34	3.05	2.49	2.25	2.52	2.5	2.37	3.8	6	10	9	1	3	11	6	14	14	11	7	4	1	8	25	15	12	21	24	15	6	10	19	8	Chr02
Glyma.02G006000.Wm82.a2.v1	0.84	1.61	0.64	0	0	0	0	0	0	0	0	0	1.7	1.32	1.63	0	0	0	0.7	0	0	0.42	0	0.8	2	5	1	0	0	0	0	0	0	0	0	0	3	5	10	0	0	0	4	0	0	1	0	1	Chr02
Glyma.02G006100.Wm82.a2.v1	198.96	79.04	18.18	30.4	0	6.02	1.7	4.7	0.78	0	24.19	60.21	301.49	273.37	663.13	0	80.56	1.27	417.23	22.83	246.44	338.05	4.88	217.09	183	95	11	20	0	6	2	9	1	0	20	17	206	401	1578	0	95	2	923	35	135	311	9	105	Chr02
Glyma.02G006200.Wm82.a2.v1	0	0	0	0	0	0	0	0	0	0	0	0	0	0	0.23	0	0	0	0	0	0	0	0	0	0	0	0	0	0	0	0	0	0	0	0	0	0	0	1	0	0	0	0	0	0	0	0	0	Chr02
Glyma.02G006400.Wm82.a2.v1	4.03	4.63	8.43	6.34	9.82	9.77	4.74	7.75	2.16	3.49	1.68	0	7.46	4.11	3.7	12.76	9.04	6.75	3.35	4.54	5.08	1.51	2.26	5.75	8	12	11	9	15	21	12	32	6	6	3	0	11	13	19	33	23	23	16	15	6	3	9	6	Chr02
Glyma.02G006500.Wm82.a2.v1	3.82	1.95	1.94	1.78	2.48	2.06	2.25	2.45	2.73	2.21	0.35	3.11	3	0.8	0.62	3.17	1.99	1.48	1.06	2.1	0.53	0.32	0.32	0	12	8	4	4	6	7	9	16	12	6	1	3	7	4	5	13	8	8	8	11	1	1	2	0	Chr02
Glyma.02G006600.Wm82.a2.v1	6.37	10.98	4.24	3.9	12.41	16.56	11.86	14.75	8.26	1.38	4.43	0	12.34	12.24	10.01	20.47	14.29	15.76	14.25	11.48	10.7	2.79	4.18	4.55	16	36	7	7	24	45	38	77	29	3	10	0	23	49	65	67	46	68	86	48	16	7	21	6	Chr02
Glyma.02G006700.Wm82.a2.v1	0	0	0	0	0	0	0	0	0.95	6.11	7.35	8.62	0	0	0	0	0	0	0.55	0.79	0	13.22	2.64	0	0	0	0	0	0	0	0	0	1	4	5	2	0	0	0	0	0	0	1	1	0	10	4	0	Chr02
Glyma.02G006800.Wm82.a2.v1	0.36	0	0.55	0.5	2.81	1.67	1.13	2.08	2.06	0	0	0	0.49	1.81	1.26	3.6	1.97	1.68	0.3	1.3	0	0.36	0	0	1	0	1	1	6	5	4	12	8	0	0	0	1	8	9	13	7	8	2	6	0	1	0	0	Chr02
Glyma.02G006900.Wm82.a2.v1	0.28	1.26	0.84	1.15	1.79	0.51	1.29	0.79	0.39	0	0	0	0.37	0.86	0.64	1.27	1.29	0.8	0.23	0.66	0.46	0.28	0.27	0.52	1	6	2	3	5	2	6	6	2	0	0	0	1	5	6	6	6	5	2	4	1	1	2	1	Chr02
Glyma.02G007000.Wm82.a2.v1	0	0	0	0	0	0	0.6	0	0	0	0.85	0	0	0	0	0	0	0.44	0	0	0	0	0	0	0	0	0	0	0	0	1	0	0	0	1	0	0	0	0	0	0	1	0	0	0	0	0	0	Chr02
Glyma.02G007100.Wm82.a2.v1	0.24	0.19	0	0.34	0.94	1.79	0.95	0.58	0	0	0	0	0.65	0.3	0.37	0.19	0.38	0.7	0.2	0	0	0	0.12	0	1	1	0	1	3	8	5	5	0	0	0	0	2	2	4	1	2	5	2	0	0	0	1	0	Chr02
Glyma.02G007300.Wm82.a2.v1	0	0	0	0	0	0	0	0	0	0	0	0	0	0	0.26	0	0	0	0	0	0	0	0	0	0	0	0	0	0	0	0	0	0	0	0	0	0	0	1	0	0	0	0	0	0	0	0	0	Chr02
Glyma.02G007400.Wm82.a2.v1	3.65	5.58	3.69	1.7	0	0	1.43	0.58	0.43	1.4	0	0	4.09	0	2.11	0.93	0	0.71	0.51	0	0	0	0	0	6	12	4	2	0	0	3	2	1	2	0	0	5	0	9	2	0	2	2	0	0	0	0	0	Chr02
Glyma.02G007500.Wm82.a2.v1	1.17	0	1.77	0	0	0	0	0	0	0	0	0	0.52	0.97	0.3	0	0	0	0	0	0	0	0	0	3	0	3	0	0	0	0	0	0	0	0	0	1	4	2	0	0	0	0	0	0	0	0	0	Chr02
Glyma.02G007600.Wm82.a2.v1	5.55	6.58	1.69	1.94	3.6	2.31	2.39	2.53	1.98	1.28	1.54	0.9	6.35	7.65	4.5	4.04	3.25	3.07	1.5	2.33	3.73	0.83	1.38	1.06	20	31	4	5	10	9	11	19	10	4	5	1	17	44	42	19	15	19	13	14	8	3	10	2	Chr02
Glyma.02G007800.Wm82.a2.v1	1.52	1.36	1.16	1.78	0.66	2.11	0.8	1.59	1.82	0.88	0.85	0.83	1.37	1.59	0.98	1.95	1.59	1.48	2.43	1.22	0.85	1.52	0.51	0.48	6	7	3	5	2	9	4	13	10	3	3	1	4	10	10	10	8	10	23	8	2	6	4	1	Chr02
Glyma.02G008000.Wm82.a2.v1	1.34	0.13	1.78	3.75	2.61	1.24	0.39	1.93	0.84	0	0.37	0	0.68	1.36	1.29	1.28	2.09	2.24	0.97	1.71	0.84	0.84	0.33	0.32	8	1	7	16	12	8	3	24	7	0	2	0	3	13	20	10	16	23	14	17	3	5	4	1	Chr02
Glyma.02G008100.Wm82.a2.v1	9.12	5.58	2.22	24.99	36.46	26.95	8.29	19.29	10.69	0.42	3.65	2.38	11.78	11.21	6.49	16.23	23.61	19.52	10.92	9.41	4.9	4.38	4.37	2.77	25	20	4	49	77	80	29	110	41	1	9	2	24	49	46	58	83	92	72	43	8	12	24	4	Chr02
Glyma.02G008400.Wm82.a2.v1	0	0	0	0	0	0	0	0	0	0	0	0	0	0	0	0	0	0	0	0.21	0	0	0	0	0	0	0	0	0	0	0	0	0	0	0	0	0	0	0	0	0	0	0	1	0	0	0	0	Chr02
Glyma.02G008500.Wm82.a2.v1	20.59	21.52	11.44	7.2	15.94	13.53	9.93	14.28	9.34	5.03	6.17	5.16	21.33	31.04	23.12	17.92	13.59	15.67	14	8.56	11.3	5.54	8.7	15.82	52	71	19	13	31	37	32	75	33	11	14	4	40	125	151	59	44	68	85	36	17	14	44	21	Chr02
Glyma.02G008600.Wm82.a2.v1	21.66	21.05	21.66	17.19	18.24	10.63	8.26	15.85	7.25	6.31	9.33	5.09	30.21	24.47	26.77	15.26	18.11	11.13	10.79	8.78	10.81	6.24	7.21	12.62	111	141	73	63	72	59	54	169	52	28	43	8	115	200	355	102	119	98	133	75	33	32	74	34	Chr02
Glyma.02G008800.Wm82.a2.v1	32.74	17.11	41.28	62.52	36.28	24.33	28.79	33.78	34.24	24.92	37.31	23.41	32.25	44.56	48.77	23.27	28.03	28.81	28.55	28.27	28.16	26.35	27.1	33.41	41	28	34	56	35	33	46	88	60	27	42	9	30	89	158	38	45	62	86	59	21	33	68	22	Chr02
Glyma.02G009100.Wm82.a2.v1	1.78	6.81	8.12	6.22	8.08	5.75	5.23	3.42	6.04	3.08	3.46	7.24	20.36	6.97	6.7	8.19	7.98	5.95	3.88	6.14	5.23	4.89	2.89	3.38	4	20	12	10	14	14	15	16	19	6	7	5	34	25	39	24	23	23	21	23	7	11	13	4	Chr02
Glyma.02G009200.Wm82.a2.v1	22.39	17.57	25.86	15.45	25.76	18.85	17.55	17.72	15.8	12.77	11.35	8.31	15.26	16.17	18.3	13.26	13.04	12.04	10.02	9.36	3.81	4.82	6.37	9.7	79	81	60	39	70	72	79	130	78	39	36	9	40	91	167	61	59	73	85	55	8	17	45	18	Chr02
Glyma.02G009300.Wm82.a2.v1	0	0	0	0	0	0	0	0.19	0	0	0	0	0	0	0	0	0.31	0	0	0	0	0	0	0	0	0	0	0	0	0	0	1	0	0	0	0	0	0	0	0	1	0	0	0	0	0	0	0	Chr02
Glyma.02G009400.Wm82.a2.v1	2.89	1.66	3.29	1.01	0.94	0	5.66	1.04	1.55	8.35	4.82	2.35	0.97	2.26	4.47	1.66	0	2.1	3.6	6.07	0	10.11	13.7	10.99	4	3	3	1	1	0	10	3	3	10	6	1	1	5	16	3	0	5	12	14	0	14	38	8	Chr02
Glyma.02G009500.Wm82.a2.v1	8.84	11.28	10.46	17.85	28.06	7.26	5.39	6.14	2.11	4.54	10.93	0	15.87	27.72	31.14	5.27	8.43	4	5.31	1.77	6.6	4.91	6.37	11.21	9	15	7	13	22	8	7	13	3	4	10	0	12	45	82	7	11	7	13	3	4	5	13	6	Chr02
Glyma.02G009700.Wm82.a2.v1	72.93	79.68	20.92	61.23	62.82	77.3	54.27	58.1	55.4	28.62	29.85	14.94	99.41	83.12	81.29	60.68	69.05	61.11	47.48	44.45	56.6	19.26	27.01	27.48	318	454	60	191	211	365	302	527	338	108	117	20	322	578	917	345	386	458	498	323	147	84	236	63	Chr02
Glyma.02G009800.Wm82.a2.v1	0.54	0	0	0	0	1.51	0.43	0	0	0	0	0	0	0	0.42	0.83	1.27	0	0.23	0.65	0	0	0.54	0	1	0	0	0	0	3	1	0	0	0	0	0	0	0	2	2	3	0	1	2	0	0	2	0	Chr02
Glyma.02G010000.Wm82.a2.v1	0	0	0	0	0	0	0	0	0	0	0	0	0	1.89	0	0	0	0	0	0	0	0	0	0	0	0	0	0	0	0	0	0	0	0	0	0	0	3	0	0	0	0	0	0	0	0	0	0	Chr02
Glyma.02G010100.Wm82.a2.v1	0.95	0	0	0	0	0	0	0	0	0	0	0	0	0	0	0	0	0	0	0	0	0	0	0	2	0	0	0	0	0	0	0	0	0	0	0	0	0	0	0	0	0	0	0	0	0	0	0	Chr02
Glyma.02G010200.Wm82.a2.v1	9.06	11.73	14.84	1.95	4.52	3.22	1.64	2.35	3.49	4.03	2.33	0	10.32	6.99	10.24	5.88	1.09	3.65	1.16	4.6	4.68	1.39	2.43	5.3	13	22	14	2	5	5	3	7	7	5	3	0	11	16	38	11	2	9	4	11	4	2	7	4	Chr02
Glyma.02G010300.Wm82.a2.v1	5.1	5.47	6.98	4.28	2.32	2.36	1	2.33	0.55	2.36	2.84	0.83	8.58	9.6	5.92	1.76	3.58	1.34	2.23	0.77	1.28	2.04	1.15	0.49	20	28	18	12	7	10	5	19	3	8	10	1	25	60	60	9	18	9	21	5	3	8	9	1	Chr02
Glyma.02G010500.Wm82.a2.v1	5.33	5.38	4.05	7.79	5.35	6.71	6.84	5.71	4.33	4.2	6.47	2.37	4.57	7.75	4.78	5.76	7.37	3.95	5.04	3.34	4.48	5.09	3.02	5.99	22	29	11	23	17	30	36	49	25	15	24	3	14	51	51	31	39	28	50	23	11	21	25	13	Chr02
Glyma.02G010600.Wm82.a2.v1	2.95	7.77	0	0	0.43	0	0	0	0	0	0	0	6.17	5.96	3.55	0	0	0	0	0	0	0	0	0	9	31	0	0	1	0	0	0	0	0	0	0	14	29	28	0	0	0	0	0	0	0	0	0	Chr02
Glyma.02G010700.Wm82.a2.v1	4.28	2.87	1.63	0.75	5.56	1.98	1.68	4.63	2.68	3.09	3.57	3.49	3.6	1.68	1.45	2.05	3.34	4.36	1.34	3.21	6.29	2.14	0.8	1.02	8	7	2	1	8	4	4	18	7	5	6	2	5	5	7	5	8	14	6	10	7	4	3	1	Chr02
Glyma.02G010800.Wm82.a2.v1	0	0	0	0	0	0	0	0	1.65	1.34	0	0	0	0.73	0	0	0	0	0	0	0	0	0	0	0	0	0	0	0	0	0	0	2	1	0	0	0	1	0	0	0	0	0	0	0	0	0	0	Chr02
Glyma.02G010900.Wm82.a2.v1	1.4	3.57	3.55	2.61	1.21	0.86	0.73	1.35	0	0.54	0.52	1.52	1.89	3.51	1.81	0.36	0	0	0	0	0	0	0.23	0	3	10	5	4	2	2	2	6	0	1	1	1	3	12	10	1	0	0	0	0	0	0	1	0	Chr02
Glyma.02G011100.Wm82.a2.v1	20.13	17.15	12.84	10.89	10.96	12.29	7.89	10.77	3.48	2.25	0.36	6.35	24.92	16.29	20.21	16.44	15.45	13.79	10.8	9.35	8.18	4.55	5.02	6.79	62	69	26	24	26	41	31	69	15	6	1	6	57	80	161	66	61	73	80	48	15	14	31	11	Chr02
Glyma.02G011300.Wm82.a2.v1	2.15	4.93	2.18	7	3.71	6.61	3.36	8.25	4.09	0.83	4.77	0	2.89	5.38	5.25	3.84	3.91	5.83	5.95	6.87	1.2	2.86	2.5	2.72	3	9	2	7	4	10	6	24	8	1	6	0	3	12	19	7	7	14	20	16	1	4	7	2	Chr02
Glyma.02G011400.Wm82.a2.v1	3.4	2.2	2.39	3.29	3.06	3.62	3.89	4.65	5.61	0.91	2.04	3.41	4.22	3.77	3.03	4.61	5.3	5.17	5.44	3.45	3.51	2.61	2.87	0.99	13	11	6	9	9	15	19	37	30	3	7	4	12	23	30	23	26	34	50	22	8	10	22	2	Chr02
Glyma.02G011800.Wm82.a2.v1	20.35	25.26	20.08	15.38	20	19.3	13.36	20.37	14.55	9.54	8.57	1.79	29.62	28.63	25.3	23.21	19.31	25.29	19.44	15.52	11.08	7.15	10.43	8.37	37	60	24	20	28	38	31	77	37	15	14	1	40	83	119	55	45	79	85	47	12	13	38	8	Chr02
Glyma.02G011900.Wm82.a2.v1	1.56	0	7.1	4.35	4.04	0.48	7.32	2.74	4.82	4.2	1.15	5.07	0	1.3	1.6	4.78	2.43	3.93	4.53	12.15	7.84	0.52	4.66	4.93	3	0	9	6	6	1	18	11	13	7	2	3	0	4	8	12	6	13	21	39	9	1	18	5	Chr02
Glyma.02G012100.Wm82.a2.v1	5.34	5.07	4.55	5.38	6.38	8.69	11.73	6.99	5.19	8.15	7.13	3.48	2.88	4.29	2.97	3.61	5.34	6.34	5.95	5.64	5.38	5.34	5.12	4.88	25	31	14	18	23	44	70	68	34	33	30	5	10	32	36	22	32	51	67	44	15	25	48	12	Chr02
Glyma.02G012200.Wm82.a2.v1	0	2.11	2.79	0	2.38	1.7	0.72	1.77	0	1.06	1.02	2.99	0	2.3	1.42	2.11	1.43	2.67	1.15	0.55	3.08	5.51	3.67	0	0	3	2	0	2	2	1	4	0	1	1	1	0	4	4	3	2	5	3	1	2	6	8	0	Chr02
Glyma.02G012300.Wm82.a2.v1	5.78	7.97	3.52	19.4	35.29	44.32	36.71	34.75	44.22	25.39	22.51	26.38	7.78	7.61	4.47	54.11	48.72	46.77	40.15	48.58	50.49	27.75	50.5	37.39	10	18	4	24	47	83	81	125	107	38	35	14	10	21	20	122	108	139	167	140	52	48	175	34	Chr02
Glyma.02G012400.Wm82.a2.v1	96.68	95.83	50.32	89.8	90.13	104.26	60.51	72.37	55.65	38.99	46.91	54.96	75.99	88.7	92.8	86.59	90.09	87.59	48.83	53.34	59.92	20.11	44.68	23.44	149	193	51	99	107	174	119	232	120	52	65	26	87	218	370	174	178	232	181	137	55	31	138	19	Chr02
Glyma.02G012500.Wm82.a2.v1	0	0.77	1.53	2.81	1.3	11.12	14.95	17.86	21.52	20.88	17.87	35.98	0	0	0.39	13.86	13.31	28.62	23.37	31.93	15.17	24.09	19.54	13.36	0	1	1	2	1	12	19	37	30	18	16	11	0	0	1	18	17	49	56	53	9	24	39	7	Chr02
Glyma.02G012600.Wm82.a2.v1	29.33	44.36	42.52	33.85	40.73	741.6	2430.21	2367.26	4436.22	4016.75	4371.28	2701.85	17.9	44.69	39.02	922.22	358.82	1907.21	6159.62	6833.85	5351.35	5903.41	6041.45	6929.33	86	170	82	71	92	2355	9094	14439	18202	10193	11524	2432	39	209	296	3526	1349	9612	43443	33396	9346	17315	35501	10685	Chr02
Glyma.02G012700.Wm82.a2.v1	28.72	34.44	24.75	36.81	24.86	43.32	40.51	31.07	43.79	29.87	29.82	26.51	36.09	35.72	36.82	40.02	45.55	34.54	37.62	39.35	51.44	27.76	32.97	36.41	60	94	34	55	40	98	108	135	128	54	56	17	56	119	199	109	122	124	189	137	64	58	138	40	Chr02
Glyma.02G012800.Wm82.a2.v1	4.77	4.72	5.55	5.1	6.19	5.18	4.62	4.59	6.42	1.3	1.87	3.66	6.42	4.4	3.58	6.03	6.57	6.69	5.48	3.37	3.77	2.53	3.64	2.13	17	22	13	13	17	20	21	34	32	4	6	4	17	25	33	28	30	41	47	20	8	9	26	4	Chr02
Glyma.02G012900.Wm82.a2.v1	3.34	2.47	3.27	4.17	4.49	4.08	2.25	4.02	2.47	2.21	1.46	1.17	4.66	4.34	3.05	5.95	3.82	3.26	3.33	2.65	2.21	1.31	1.79	4.09	28	27	18	25	29	37	24	70	29	16	11	3	29	58	66	65	41	47	67	37	11	11	30	18	Chr02
Glyma.02G013000.Wm82.a2.v1	0.54	0.82	0	0.75	3.49	5.96	0.42	1.03	0.38	0	0	3.51	1.45	1.01	1.04	3.3	3.78	1.57	0.89	0.32	2.71	0.54	0.27	0	1	2	0	1	5	12	1	4	1	0	0	2	2	3	5	8	9	5	4	1	3	1	1	0	Chr02
Glyma.02G013100.Wm82.a2.v1	0	0	0.95	0.87	0	0.57	2.92	0.9	4.44	15.09	9.68	22.29	0	0.78	0	0.48	0.49	0.72	0.52	3.36	4.18	11.19	6.83	2.37	0	0	1	1	0	1	6	3	10	21	14	11	0	2	0	1	1	2	2	9	4	18	22	2	Chr02
Glyma.02G013200.Wm82.a2.v1	0	0	7.83	0	0.74	0	0	0.28	0	0	0	0	0.77	0.72	2.21	0	0	0	0.48	0	0	0	0	0	0	0	9	0	1	0	0	1	0	0	0	0	1	2	10	0	0	0	2	0	0	0	0	0	Chr02
Glyma.02G013300.Wm82.a2.v1	0.25	0.19	1.51	0.69	0	0	0	0.24	0	0	0	0	0	0.47	1.25	0	0.19	0	0.1	0	0	0	0	0	1	1	4	2	0	0	0	2	0	0	0	0	0	3	13	0	1	0	1	0	0	0	0	0	Chr02
Glyma.02G013400.Wm82.a2.v1	2.71	1.55	1.03	15.13	14.05	15.61	2.12	8.13	2.9	2.34	3.76	2.2	0.91	2.54	1.83	14.01	19.52	9.84	4.5	4.46	4.54	0.68	1.35	3.86	4	3	1	16	16	25	4	25	6	3	5	1	1	6	7	27	37	25	16	11	4	1	4	3	Chr02
Glyma.02G013500.Wm82.a2.v1	0.34	0.78	0.26	1.18	2.42	2.19	0.4	1.55	0.36	0	0.38	1.1	0.46	0.32	0.65	1.3	1.32	1.67	0.42	0.61	0.57	0	0.08	0.32	2	6	1	5	11	14	3	19	3	0	2	2	2	3	10	10	10	17	6	6	2	0	1	1	Chr02
Glyma.02G013600.Wm82.a2.v1	37.85	30.93	34.14	62.78	70.79	57.46	37.7	41.02	40.8	14.08	24.97	20.9	37.13	30.97	32.98	56.58	69.55	43.3	32.81	32.33	33.39	19.24	26.89	40.26	59	63	35	70	85	97	75	133	89	19	35	10	43	77	133	115	139	116	123	84	31	30	84	33	Chr02
Glyma.02G013700.Wm82.a2.v1	3.08	2.15	2.13	0.78	3.28	0.78	2.64	4.72	1.8	3.24	1.56	1.83	5.28	4.92	3.9	1.72	2.62	3.91	2.33	4.21	1.88	1.68	1.4	0.53	11	10	5	2	9	3	12	35	9	10	5	2	14	28	36	8	12	24	20	25	4	6	10	1	Chr02
Glyma.02G013800.Wm82.a2.v1	0	1.79	0	2.62	0	0	0	0	0.67	0	0	0	0	0	0.18	0	0	0.82	0.19	0	0	0	0	0	0	5	0	4	0	0	0	0	2	0	0	0	0	0	1	0	0	3	1	0	0	0	0	0	Chr02
Glyma.02G013900.Wm82.a2.v1	0	1.36	0	0	0	0	0	0.43	0.32	0	0	0	2.4	1.68	1.9	0.68	0.35	0.26	0.74	0	0.75	0	0.22	0	0	4	0	0	0	0	0	2	1	0	0	0	4	6	11	2	1	1	4	0	1	0	1	0	Chr02
Glyma.02G014000.Wm82.a2.v1	60.05	67.44	25.49	68.69	72.39	88.94	58.36	65.43	56.02	47.76	68.96	29.22	44.09	65.28	54.41	51.14	70.56	64.66	57.56	57.56	48.45	32.75	39.5	43.75	154	226	43	126	143	247	191	349	201	106	159	23	84	267	361	171	232	285	355	246	74	84	203	59	Chr02
Glyma.02G014100.Wm82.a2.v1	5.61	8.15	1.7	6.27	8.01	7.77	8.79	9.16	3.61	4.53	3.74	3.65	6.04	7.73	5.85	4.73	4.37	9.79	4.43	5.38	9.41	2.24	3.92	2.13	10	19	2	8	11	15	20	34	9	7	6	2	8	22	27	11	10	30	19	16	10	4	14	2	Chr02
Glyma.02G014200.Wm82.a2.v1	6.15	6.72	4.45	11.87	7.22	10.82	1.61	5.49	2.93	3.05	1.63	1.91	4.73	5.14	6.9	4.94	7.99	6.47	4.26	2.81	0.98	0.29	0.88	1.67	21	30	10	29	19	40	7	39	14	9	5	2	12	28	61	22	35	38	35	16	2	1	6	3	Chr02
Glyma.02G014300.Wm82.a2.v1	0	0	0	0	0	0	2.2	0	0	0	0	0	0	0	0	0	0	0	0	0	0	0	0	0	0	0	0	0	0	0	4	0	0	0	0	0	0	0	0	0	0	0	0	0	0	0	0	0	Chr02
Glyma.02G014500.Wm82.a2.v1	0	0	0	1.3	0	2.58	0	1.79	0.67	0	0	0	1.26	0.58	0	0.72	4.36	1.09	0.78	0.56	1.57	0	1.4	0	0	0	0	1	0	3	0	4	1	0	0	0	1	1	0	1	6	2	2	1	1	0	3	0	Chr02
Glyma.02G014600.Wm82.a2.v1	0	0	0	0	0	0	0	0	0	0	0	0	0	0	0	0	0	0.94	0	0	0	0	0	0	0	0	0	0	0	0	0	0	0	0	0	0	0	0	0	0	0	1	0	0	0	0	0	0	Chr02
Glyma.02G014700.Wm82.a2.v1	2.25	0	1.14	0	0	2.08	0	1.08	0.54	0	0	0	0	1.41	0.87	1.72	1.75	0.87	0	1.35	0	0	0	0	3	0	1	0	0	3	0	3	1	0	0	0	0	3	3	3	3	2	0	3	0	0	0	0	Chr02
Glyma.02G014800.Wm82.a2.v1	7.79	7.37	11.15	5.13	2.98	4.66	4.31	9.04	3.6	4.24	6.12	2.99	5.55	6.61	6.56	6.68	5.36	7.2	11.05	6.88	0.77	8.71	6.63	9.59	17	21	16	8	5	11	12	41	11	8	12	2	9	23	37	19	15	27	58	25	1	19	29	11	Chr02
Glyma.02G014900.Wm82.a2.v1	13.61	5.55	22.07	0	0	0	0	0	0	0	0	0	4.88	2.84	7.01	0	0	0	0	0	0	0	0	0	15	8	16	0	0	0	0	0	0	0	0	0	4	5	20	0	0	0	0	0	0	0	0	0	Chr02
Glyma.02G015000.Wm82.a2.v1	2.07	0	12.6	0	0	0	0	0	0	0	0	0	0	0	1.33	0	0	0	0	0	0	0	0	0	3	0	12	0	0	0	0	0	0	0	0	0	0	0	5	0	0	0	0	0	0	0	0	0	Chr02
Glyma.02G015100.Wm82.a2.v1	12.95	18.77	4.14	12.38	22.11	27.69	7.48	15.72	10.23	7.87	6.06	8.88	13.76	18.37	11.59	36.58	34.55	25.77	6.23	10.22	4.58	7.49	3.06	7.77	19	36	4	13	25	44	14	48	21	10	8	4	15	43	44	70	65	65	22	25	4	11	9	6	Chr02
Glyma.02G015200.Wm82.a2.v1	22.06	13.51	21.24	2.06	5.73	6.79	4.03	6.36	4.73	0.85	2.45	2.4	10.89	23.98	27	10.15	2.87	4.28	7.34	1.76	2.47	0.74	4.77	1.4	30	24	19	2	6	10	7	18	9	1	3	1	11	52	95	18	5	10	24	4	2	1	13	1	Chr02
Glyma.02G015300.Wm82.a2.v1	18	11.42	6.48	8.28	5.53	10.5	30.43	13.66	25.05	23.53	23.18	24.69	21.04	20.05	24.44	9.63	8.68	15.57	22.05	25.29	22.27	23.44	19.03	22.97	76	63	18	25	18	48	164	120	148	86	88	32	66	135	267	53	47	113	224	178	56	99	161	51	Chr02
Glyma.02G015400.Wm82.a2.v1	0	1.76	0	0	0	0	0.6	0	1.09	3.54	0	0	0	0	0.59	1.17	0	0	0	0.92	1.28	0.77	0.76	1.46	0	3	0	0	0	0	1	0	2	4	0	0	0	0	2	2	0	0	0	2	1	1	2	1	Chr02
Glyma.02G015500.Wm82.a2.v1	0.74	1.13	0	1.81	1.2	1.2	1.16	1.51	0.66	1.07	0.21	0	2.24	2.32	1.93	1.14	1.73	1.18	0.62	0.67	1.24	0	0.18	0.7	4	8	0	7	5	7	8	17	5	5	1	0	9	20	27	8	12	11	8	6	4	0	2	2	Chr02
Glyma.02G015600.Wm82.a2.v1	11.33	6.04	7.83	2.88	1.34	1.9	2.96	2.48	3.68	3.17	1.53	7.83	8.78	9.69	11.14	3.69	4.28	3.4	4	3.09	1.15	4.12	1.71	1.31	33	23	15	6	3	6	11	15	15	8	4	7	19	45	84	14	16	17	28	15	2	12	10	2	Chr02
Glyma.02G015700.Wm82.a2.v1	25.81	33.73	24.76	27.2	30.93	27.5	11.51	19.28	11.35	5.05	3.98	5.17	41.16	34.86	37.45	18.27	30.66	21.03	14.69	12.87	8	5.16	8.72	9.06	65	111	41	49	60	75	37	101	40	11	9	4	77	140	244	60	99	91	89	54	12	13	44	12	Chr02
Glyma.02G015800.Wm82.a2.v1	37.45	20.47	2.03	0	0	1.23	0	0.64	0	0	0	0	21.6	30.61	34.89	0	0	0	0.56	0.2	0	0	0	0	112	80	4	0	0	4	0	4	0	0	0	0	48	146	270	0	0	0	4	1	0	0	0	0	Chr02
Glyma.02G015900.Wm82.a2.v1	50.09	56.66	46.36	44.65	53.71	42.23	23.32	26.87	31.13	18.45	16.15	28.38	53.74	62.36	39.28	60.13	48.69	45.61	40.74	30.05	45.1	23.95	25.72	13.8	69	102	42	44	57	63	41	77	60	22	20	12	55	137	140	108	86	108	135	69	37	33	71	10	Chr02
Glyma.02G016000.Wm82.a2.v1	91.55	97.18	65.11	82.57	129.39	113.86	87.94	99.39	84.95	57.16	49.27	57.73	92.43	85.18	81.62	120.61	134.75	110.4	66.92	66.45	102.89	43.55	62.63	47.74	124	172	58	80	135	167	152	280	161	67	60	24	93	184	286	213	234	257	218	150	83	59	170	34	Chr02
Glyma.02G016100.Wm82.a2.v1	6.91	7.18	12.01	43.49	39.11	18.7	89.01	4.51	37.06	26.82	40.65	72.4	8.64	6.5	10.5	10.23	15.41	16.95	3.9	13.63	15.75	33.57	37.21	23.48	14	19	16	63	61	41	230	19	105	47	74	45	13	21	55	27	40	59	19	46	19	68	151	25	Chr02
Glyma.02G016200.Wm82.a2.v1	0.77	1.77	0	0	0	0	0	0	0	0	0	0	1.04	0.97	0.3	0	0	0	0	0	0	0	0	0	1	3	0	0	0	0	0	0	0	0	0	0	1	2	1	0	0	0	0	0	0	0	0	0	Chr02
Glyma.02G016400.Wm82.a2.v1	23.38	24.75	0	1.09	3.04	2.52	0.61	2.06	0.28	0	0	0	27.81	21.02	10.54	8.67	7.3	4.08	3.4	0.7	1.31	0	0.58	0	60	83	0	2	6	7	2	11	1	0	0	0	53	86	70	29	24	18	21	3	2	0	3	0	Chr02
Glyma.02G016500.Wm82.a2.v1	4.45	2.88	1.04	0	0	0	0	0	0	0	0	0	15.67	16.96	22.89	0.53	0	0	0.14	0	0	1.03	0	0	13	11	2	0	0	0	0	0	0	0	0	0	34	79	173	2	0	0	1	0	0	3	0	0	Chr02
Glyma.02G016600.Wm82.a2.v1	0.36	0.27	0	0	0	0	0	0	0	0	0	0	4.32	2.69	3.31	0	0	0	0	0	0	0	0	0	1	1	0	0	0	0	0	0	0	0	0	0	9	12	24	0	0	0	0	0	0	0	0	0	Chr02
Glyma.02G016700.Wm82.a2.v1	0	0.5	0	4.57	0	0	0	0	0	0	0	0	0.88	0	0.51	0	0	0	0	0	0	0	0	0	0	1	0	5	0	0	0	0	0	0	0	0	1	0	2	0	0	0	0	0	0	0	0	0	Chr02
Glyma.02G016900.Wm82.a2.v1	65.4	65.76	27.75	36.15	51.34	54.07	17.28	30.71	25	10.55	11	0	87.02	102.52	92.59	60.08	72.96	53.98	41.1	31.03	19.15	7.6	7.21	8.68	86	113	24	34	52	77	29	84	46	12	13	0	85	215	315	103	123	122	130	68	15	10	19	6	Chr02
Glyma.02G017000.Wm82.a2.v1	2.41	4.3	0	3.36	5.21	1.48	5.03	2.7	2.87	3.71	2.68	2.61	4.32	2.51	1.24	1.85	1.25	1.87	2	0.96	1.35	1.6	4	3.05	3	7	0	3	5	2	8	7	5	4	3	1	4	5	4	3	2	4	6	2	1	2	10	2	Chr02
Glyma.02G017100.Wm82.a2.v1	7.9	12.09	15.61	16.56	7.18	3.65	17.33	6.84	1.69	2.74	7.03	7.72	5.32	5.45	7.63	8.48	6.16	2.76	5.91	6.64	5.31	3.16	8.28	6.01	10	20	13	15	7	5	28	18	3	3	8	3	5	11	25	14	10	6	18	14	4	4	21	4	Chr02
Glyma.02G017300.Wm82.a2.v1	0	0	0	0	0	1.01	0	0	0	0	0	0	0	0	0	0	0	0	0	0	0	0	0	0	0	0	0	0	0	1	0	0	0	0	0	0	0	0	0	0	0	0	0	0	0	0	0	0	Chr02
Glyma.02G017400.Wm82.a2.v1	3.05	3.69	4.25	4.26	3.63	4.93	2.39	4.4	2.36	0.88	1.7	3.31	2.05	2.39	2.65	5.85	4.56	3.55	2.01	1.98	1.28	0.25	1.52	0	12	19	11	12	11	21	12	36	13	3	6	4	6	15	27	30	23	24	19	13	3	1	12	0	Chr02
Glyma.02G017500.Wm82.a2.v1	22.49	18.12	23.4	19.19	23.05	26.67	15.77	16.96	14.04	9.3	6.85	12.34	22.63	17.22	17.93	22.7	28.25	21.35	15.65	13.5	12.72	5.44	10.99	5.85	95	100	65	58	75	122	85	149	83	34	26	16	71	116	196	125	153	155	159	95	32	23	93	13	Chr02
Glyma.02G017600.Wm82.a2.v1	2.32	0	5.29	0	0	1.07	0	0.56	0	0	0	0	0	0.73	0.45	0.89	0.9	0	0.48	0	3.89	1.16	0.58	0	2	0	3	0	0	1	0	1	0	0	0	0	0	1	1	1	1	0	1	0	2	1	1	0	Chr02
Glyma.02G017700.Wm82.a2.v1	0	0	0	0	0	0	0	0	0	0	0	0	0	0	0.21	0	0	0	0	0	0	0	0	0	0	0	0	0	0	0	0	0	0	0	0	0	0	0	1	0	0	0	0	0	0	0	0	0	Chr02
Glyma.02G017800.Wm82.a2.v1	140.31	163.62	59.26	154.9	168.42	196.41	95.99	153.12	99.88	62.41	88.57	52.6	108.68	134.42	120.09	130.68	153.74	116.63	86.58	79.19	80.4	25.61	58.07	56.12	252	384	70	199	233	382	220	572	251	97	143	29	145	385	558	306	354	360	374	237	86	46	209	53	Chr02
Glyma.02G018000.Wm82.a2.v1	192.83	126.43	102.48	77.21	82.03	59.21	40.71	67.5	31.11	28.66	19.78	21.35	216.73	214.52	299.76	66.05	80.68	58.55	56.24	44.09	25.15	20.59	29.19	21.36	412	353	144	118	135	137	111	300	93	53	38	14	344	731	1657	184	221	215	289	157	32	44	125	24	Chr02
Glyma.02G018200.Wm82.a2.v1	28.09	32.24	13.35	9.82	13.68	27.56	11.01	22.79	6.27	18.26	19.53	11.44	33.09	45.14	33.25	21.54	17.8	23.5	22.63	14.75	14.74	12.29	18.4	10.02	16	24	5	4	6	17	8	27	5	9	10	2	14	41	49	16	13	23	31	14	5	7	21	3	Chr02
Glyma.02G018300.Wm82.a2.v1	7.51	7.96	11.42	11.31	16.5	8	7.25	8.33	8.26	10.68	9	13.18	7	6.16	8.71	10.19	9.01	4.71	3.84	5.89	9.7	4.04	4.33	8.79	13	18	13	14	22	15	16	30	20	16	14	7	9	17	39	23	20	14	16	17	10	7	15	8	Chr02
Glyma.02G018500.Wm82.a2.v1	7.95	2.61	6.9	9.52	5.16	7.34	8.9	3.82	3.25	3.28	1.89	5.55	3.06	2.14	5.48	6.96	7.97	4.29	4.25	3.41	2.86	1.7	2.83	1.08	14	6	8	12	7	14	20	14	8	5	3	3	4	6	25	16	18	13	18	10	3	3	10	1	Chr02
Glyma.02G018600.Wm82.a2.v1	0	0	0.46	1.27	1.18	0	0	0.15	0	0	0	0.99	0	0	0	0	0.47	0.18	0.38	0	0	0	0	0.58	0	0	1	3	3	0	0	1	0	0	0	1	0	0	0	0	2	1	3	0	0	0	0	1	Chr02
Glyma.02G018700.Wm82.a2.v1	0	0	0	1.07	0	0.71	0.9	0	0.27	0.89	0.85	4.99	0	0	0	0	0.6	0	0	0.92	0	1.91	0.96	1.46	0	0	0	2	0	2	3	0	1	2	2	4	0	0	0	0	2	0	0	4	0	5	5	2	Chr02
Glyma.02G018900.Wm82.a2.v1	0	2.52	0	0	0	0.76	0	2.37	0	0	0	0	1.11	0.52	0	2.52	3.85	0	0	0	0	0	0	0	0	4	0	0	0	1	0	6	0	0	0	0	1	1	0	4	6	0	0	0	0	0	0	0	Chr02
Glyma.02G019000.Wm82.a2.v1	3.75	8.98	8.56	3.94	3.05	3.9	2.57	4.96	1.34	3.8	1.57	0	3.16	5.3	6.53	4.32	4.39	6.01	4.49	3.66	1.58	3.75	2.81	2.68	8	25	12	6	5	9	7	22	4	7	3	0	5	18	36	12	12	22	23	13	2	8	12	3	Chr02
Glyma.02G019100.Wm82.a2.v1	13.22	10.12	6.35	0.97	0	1.93	4.64	6.02	3.73	5.63	5.42	2.27	14.05	15.27	12.51	0.8	0.81	1.21	2.89	2.92	0.58	4.17	2.43	4.63	38	38	12	2	0	6	17	36	15	14	14	2	30	70	93	3	3	6	20	14	1	12	14	7	Chr02
Glyma.02G019200.Wm82.a2.v1	4.35	6.65	3.3	0	1.88	0	0	0.7	1.55	0.84	1.61	2.36	1.95	3.63	5.6	0.56	1.13	0.84	1.2	0.43	2.43	1.45	1.08	0	6	12	3	0	2	0	0	2	3	1	2	1	2	8	20	1	2	2	4	1	2	2	3	0	Chr02
Glyma.02G019300.Wm82.a2.v1	3.57	3.34	12.38	8.33	9.02	6.24	0.62	6.97	0.85	0.23	0.66	0	2.94	1.99	3.3	5.94	4.03	5.2	3.8	1.55	0.67	0.6	0.99	0.38	18	22	41	30	35	34	4	73	6	1	3	0	11	16	43	39	26	45	46	13	2	3	10	1	Chr02
Glyma.02G019400.Wm82.a2.v1	5.38	3.74	5.2	8.2	3.17	4.51	7.66	8.23	7.34	12.99	8.7	14.34	9.21	7.05	7.37	8.25	6.86	5.12	9.35	6.45	6.57	10.75	12.44	12.09	11	10	7	12	5	10	20	35	21	23	16	9	14	23	39	22	18	18	46	22	8	22	51	13	Chr02
Glyma.02G019500.Wm82.a2.v1	4.67	5.36	5.91	4.35	0.5	7.9	2.13	3.93	2.78	1.35	2.16	1.27	5.76	4.63	5.56	4.47	3.64	1.58	4.04	2.1	1.96	1.17	2.91	0	12	18	10	8	1	22	7	21	10	3	5	1	11	19	37	15	12	7	25	9	3	3	15	0	Chr02
Glyma.02G019600.Wm82.a2.v1	78.83	63.68	89.42	119.82	134.01	255.36	141.69	232.2	206.13	106.28	130.13	138.6	69.9	42.37	50.54	238.48	178.12	301.05	285.09	216.62	202.74	158.25	209.49	182.03	126	133	94	137	165	442	289	772	461	147	187	68	83	108	209	497	365	827	1096	577	193	253	671	153	Chr02
Glyma.02G019700.Wm82.a2.v1	3.31	2.85	1.57	3.18	1.61	1.72	0.81	2.29	2.22	2.87	1.38	0	3.34	2.33	3.12	2.06	3.39	3.01	2.06	1.86	1.39	2.48	2.06	1.57	16	18	5	11	6	9	5	23	15	12	6	0	12	18	39	13	21	25	24	15	4	12	20	4	Chr02
Glyma.02G019800.Wm82.a2.v1	0.28	0.85	0.42	1.55	2.52	0.77	0	1.87	0.6	0	0.31	0	0	2.09	0.21	0.43	1.95	0.65	0.35	1.17	0.93	0	0.28	0	1	4	1	4	7	3	0	14	3	0	1	0	0	12	2	2	9	4	3	7	2	0	2	0	Chr02
Glyma.02G019900.Wm82.a2.v1	4.19	2.85	2.12	0.65	0.6	1.29	1.09	3.36	0.67	2.69	0	0	2.51	0.88	3.96	1.43	1.81	1.08	1.74	2.79	2.34	0.93	0	0.88	9	8	3	1	1	3	3	15	2	5	0	0	4	3	22	4	5	4	9	10	3	2	0	1	Chr02
Glyma.02G020000.Wm82.a2.v1	155.88	77.07	1373.34	47.53	39.97	17.18	21.11	32.69	16.96	17.05	17.13	29.26	149.4	125.1	235.31	22.63	37.03	27.99	36.27	14.24	49.55	54.51	19.21	73.2	243	157	1408	53	48	29	42	106	37	23	24	14	173	311	949	46	74	75	136	37	46	85	60	60	Chr02
Glyma.02G020200.Wm82.a2.v1	1.84	2.11	0.7	3.21	1.79	3.39	7.91	3.97	4.59	7.96	8.17	14.95	1.24	0.29	0.89	3.17	3.58	2.94	5.72	6.06	4.62	9.18	11.45	12.22	4	6	1	5	3	8	22	18	14	15	16	10	2	1	5	9	10	11	30	22	6	20	50	14	Chr02
Glyma.02G020400.Wm82.a2.v1	2.13	1.63	3.89	3.58	2.21	0.79	1.34	2.26	0.3	3.45	1.42	6.95	1.15	0.8	1.98	1.31	0.67	0.74	1.42	0.77	1.43	0	0.43	0	5	5	6	6	4	2	4	11	1	7	3	5	2	3	12	4	2	3	8	3	2	0	2	0	Chr02
Glyma.02G020500.Wm82.a2.v1	0.35	0.41	1.08	0.74	1.61	0.33	0	0.51	1.14	0.2	0	0	0.24	0.44	0.21	0.54	1.24	1.13	0.96	0.43	0.3	0.35	0.35	0	2	3	4	3	7	2	0	6	9	1	0	0	1	4	3	4	9	11	13	4	1	2	4	0	Chr02
Glyma.02G020600.Wm82.a2.v1	0	1.25	2.48	1.14	0.53	0.38	0.32	0.2	1.75	0.94	0.91	0	0	0	0.63	0.31	0.32	0.48	0.34	0.25	0	1.63	0.61	0	0	4	4	2	1	1	1	1	6	2	2	0	0	0	4	1	1	2	2	1	0	4	3	0	Chr02
Glyma.02G020700.Wm82.a2.v1	2	2.3	0	6.99	2.6	1.85	1.57	3.36	1.43	4.62	0	0	0	3.76	3.09	0.77	2.34	2.33	2.49	3	0	0	0.5	1.9	2	3	0	5	2	2	2	7	2	4	0	0	0	6	8	1	3	4	6	5	0	0	1	1	Chr02
Glyma.02G020800.Wm82.a2.v1	9.47	5.02	6.09	10.7	11.35	5.38	4.85	8.93	5.99	4.21	3.65	1.19	11.77	7.77	8.87	7.83	10.52	9.12	6.36	7.43	4.89	4.01	5.64	5.54	26	18	11	21	24	16	17	51	23	10	9	1	24	34	63	28	37	43	42	34	8	11	31	8	Chr02
Glyma.02G020900.Wm82.a2.v1	0	0.35	0	3.83	0.59	2.53	0	1.32	0	0	0	0	0	0.57	0.35	1.4	1.43	0.8	0.38	0	0	0	0	0	0	1	0	6	1	6	0	6	0	0	0	0	0	2	2	4	4	3	2	0	0	0	0	0	Chr02
Glyma.02G021000.Wm82.a2.v1	0	0	0	1.46	4.07	0	0	1	1.49	0	0	0	0	0	0	2.4	2.44	3.64	2.17	0.63	1.75	0	0	0	0	0	0	1	3	0	0	2	2	0	0	0	0	0	0	3	3	6	5	1	1	0	0	0	Chr02
Glyma.02G021200.Wm82.a2.v1	3.39	1.04	0	18.02	26.42	11.9	0	10.11	0.48	0	0	0	4.57	0	0.52	10.92	7.41	3.95	0.85	0	0	0	0	0	5	2	0	19	30	19	0	31	1	0	0	0	5	0	2	21	14	10	3	0	0	0	0	0	Chr02
Glyma.02G021400.Wm82.a2.v1	6.07	4.65	8.4	15.44	13.62	12.75	7.79	13.27	9.87	3.19	2.46	0	3.72	4.85	4.7	16.09	17.23	9	11.71	8.28	2.78	6.62	6.34	7.35	11	11	10	20	19	25	18	50	25	5	4	0	5	14	22	38	40	28	51	25	3	12	23	7	Chr02
Glyma.02G021500.Wm82.a2.v1	160.6	115.4	56.29	516.01	498.97	392.13	156.14	377.16	140.85	117.64	115.66	86.91	232.32	285.38	204.96	387.48	429.31	382.97	242.42	209.4	166.36	90.9	103.51	124.24	295	277	68	678	706	780	366	1441	362	187	191	49	317	836	974	928	1011	1209	1071	641	182	167	381	120	Chr02
Glyma.02G021600.Wm82.a2.v1	8.88	4.08	10.8	80.06	62.82	36.49	20.87	45.89	23.48	13.34	11.85	8.68	7.77	5.57	4.46	45.63	38.78	41.85	24.18	22.64	18.64	10.65	17.5	12.66	20	12	16	129	109	89	60	215	74	26	24	6	13	20	26	134	112	162	131	85	25	24	79	15	Chr02
Glyma.02G021700.Wm82.a2.v1	8.59	7.89	9.58	12.81	10.78	12.96	11.22	14.04	11.87	7.28	7.96	11.19	10.02	8.8	9.63	15.15	14.74	12.83	9.88	11.86	6.73	7.16	7	4.9	30	36	22	32	29	49	50	102	58	22	25	12	26	49	87	69	66	77	83	69	14	25	49	9	Chr02
Glyma.02G021900.Wm82.a2.v1	1.62	2.12	4.21	1.29	3.3	0.64	0.54	1	2.8	1.87	1.54	0.75	3.11	2.17	1.16	4.25	1.8	2.15	1.54	2.35	1.94	2.08	2.07	2.19	7	12	12	4	11	3	3	9	17	7	6	1	10	15	13	24	10	16	16	17	5	9	18	5	Chr02
Glyma.02G022000.Wm82.a2.v1	12.25	9.64	25.88	21.41	11.05	7.54	6.13	6.87	8.03	7.87	6.06	6.65	18.33	13.23	16.84	7.05	6.37	5.35	5.94	7.15	4	6.13	4.25	8.41	36	37	50	45	25	24	23	42	33	20	16	6	40	62	128	27	24	27	42	35	7	18	25	13	Chr02
Glyma.02G022200.Wm82.a2.v1	0.36	0	0	0.5	1.87	2.66	1.69	2.25	2.06	1.25	2	2.34	0	0	0	4.14	1.12	3.35	1.49	1.51	1.81	1.08	1.26	1.37	1	0	0	1	4	8	6	13	8	3	5	2	0	0	0	15	4	16	10	7	3	3	7	2	Chr02
Glyma.02G022300.Wm82.a2.v1	8.79	5.45	8.27	14.63	10.33	13.53	4.92	9.06	5.98	2.42	5.59	4.09	1.13	7.87	8.74	8.67	10.45	8.28	6.96	6.03	4.22	2.51	6.06	4.78	21	17	13	25	19	35	15	45	20	5	12	3	2	30	54	27	32	34	40	24	6	6	29	6	Chr02
Glyma.02G022500.Wm82.a2.v1	2.7	3.67	2.74	0.84	1.56	3.05	1.88	1.88	2.57	0.35	2	0.98	1.62	1.88	3.36	2.99	2.11	3.32	1.62	2.7	3.02	1.2	0.3	1.71	9	16	6	2	4	11	8	13	12	1	6	1	4	10	29	13	9	19	13	15	6	4	2	3	Chr02
Glyma.02G022700.Wm82.a2.v1	2.07	1.85	0.52	0	0	0	0	0	0	0	0	0	4.65	4.55	4.27	0	0	0.2	0	0	0	0	0	0	6	7	1	0	0	0	0	0	0	0	0	0	10	21	32	0	0	1	0	0	0	0	0	0	Chr02
Glyma.02G022800.Wm82.a2.v1	42.97	37.28	18.67	34.32	51.79	39.32	30.96	34.49	26.59	17.29	13.23	15	32.02	25.74	25.06	49.14	48.77	34.6	27.91	21.18	33.49	11.51	15.51	12.4	112	127	32	64	104	111	103	187	97	39	31	12	62	107	169	167	163	155	175	92	52	30	81	17	Chr02
Glyma.02G023100.Wm82.a2.v1	2.96	3.78	3	2.76	0	0	1.55	2.37	0.71	1.14	2.2	0	2.66	3.1	1.91	1.52	1.54	0.57	0.41	0.59	0	1.97	0.99	1.88	3	5	2	2	0	0	2	5	1	1	2	0	2	5	5	2	2	1	1	1	0	2	2	1	Chr02
Glyma.02G023400.Wm82.a2.v1	7.77	6.54	22.46	0	1.01	0	0	0.37	0	0	0	0	4.19	12.67	13.82	0	0	0.45	0.32	0	0	0	0	0	10	11	19	0	1	0	0	1	0	0	0	0	4	26	46	0	0	1	1	0	0	0	0	0	Chr02
Glyma.02G023500.Wm82.a2.v1	1.99	4.19	9.08	4.17	0	1.38	3.51	2.87	0.71	2.3	2.21	1.62	6.03	4.68	5.19	2.29	2.33	3.47	3.31	3.28	1.67	0.5	2.73	0	4	11	12	6	0	3	9	12	2	4	4	1	9	15	27	6	6	12	16	11	2	1	11	0	Chr02
Glyma.02G023800.Wm82.a2.v1	4.39	2.35	0	2.45	2.85	2.84	1.03	2.95	0.31	0	1.95	0	2.36	4.95	3.22	2.02	0.68	2.04	2.37	0.79	2.21	1.32	0.44	0.83	10	7	0	4	5	7	3	14	1	0	4	0	4	18	19	6	2	8	13	3	3	3	2	1	Chr02
Glyma.02G023900.Wm82.a2.v1	0	1.55	2.06	2.84	0.88	0	0.53	0.33	0.97	0	1.5	0	0	0.42	1.05	0	0	0	1.41	0.41	2.27	0.68	0.34	0	0	3	2	3	1	0	1	1	2	0	2	0	0	1	4	0	0	0	5	1	2	1	1	0	Chr02
Glyma.02G024100.Wm82.a2.v1	0.52	0.39	0	1.44	0.67	1.9	0.4	0.99	0	1.19	0.57	0	0	0	0.2	2.37	1.21	0.9	0.64	0	0	0	1.29	0.98	1	1	0	2	1	4	1	4	0	2	1	0	0	0	1	6	3	3	3	0	0	0	5	1	Chr02
Glyma.02G024200.Wm82.a2.v1	0.33	0	1.01	3.26	0	0.31	0	0.96	0	0.39	0	0	0.45	0.63	0.52	0.51	0.26	0	0	0.8	0	1	0.33	0.63	1	0	2	7	0	1	0	6	0	1	0	0	1	3	4	2	1	0	0	4	0	3	2	1	Chr02
Glyma.02G024400.Wm82.a2.v1	6	2.99	5.15	6.2	3.72	9.15	3.68	9.65	3.54	1.21	2.32	0	1.4	3.92	4.13	7.8	8.95	6.37	8.46	4.69	4.38	2.61	2.86	0.99	23	15	13	17	11	38	18	77	19	4	8	0	4	24	41	39	44	42	78	30	10	10	22	2	Chr02
Glyma.02G024500.Wm82.a2.v1	4.29	6.57	13.05	2.18	3.55	2.16	1.22	4.31	2.79	0.45	0.43	2.54	7.35	5.38	5.13	6.28	7	3.41	2.92	3.51	1.31	1.17	2.73	1.48	11	22	22	4	7	6	4	23	10	1	1	2	14	22	34	21	23	15	18	15	2	3	14	2	Chr02
Glyma.02G024600.Wm82.a2.v1	0.77	1.18	0	1.07	0	0	0	0	0	0	0	0	1.03	0.96	0	0	0	0	0	0	0	0	0	0	1	2	0	1	0	0	0	0	0	0	0	0	1	2	0	0	0	0	0	0	0	0	0	0	Chr02
Glyma.02G024800.Wm82.a2.v1	0.66	0	0	0	0	0	0	0	0	0	0	0	0	0	0.51	0	0	0	0	0	0	0	0	0	1	0	0	0	0	0	0	0	0	0	0	0	0	0	2	0	0	0	0	0	0	0	0	0	Chr02
Glyma.02G024900.Wm82.a2.v1	0	0	0	0	0	0	0.86	0.53	0	0	0.61	0	1.48	0.69	0.64	0	0	0	0	0.33	0.92	0.55	0.27	2.09	0	0	0	0	0	0	2	2	0	0	1	0	2	2	3	0	0	0	0	1	1	1	1	2	Chr02
Glyma.02G025000.Wm82.a2.v1	3.54	1.88	3.31	5.33	4.95	5.28	6.83	7.99	5.26	5.35	3.33	3.55	1.47	3.25	1.47	7.32	5.31	8.56	5.67	6.05	5.49	7.36	3.4	6.74	13	9	8	14	14	21	32	61	27	17	11	4	4	19	14	35	25	54	50	37	12	27	25	13	Chr02
Glyma.02G025100.Wm82.a2.v1	0	0	0	0.35	0	0.23	0	0.24	0	0	0	0	0	0	0	0	0	0.14	0	0	0.83	0	0	0	0	0	0	1	0	1	0	2	0	0	0	0	0	0	0	0	0	1	0	0	2	0	0	0	Chr02
Glyma.02G025200.Wm82.a2.v1	3.11	1.06	4.2	0.97	0.45	1.28	0.81	1.49	0.25	0	1.15	0	4.18	2.6	2.14	0.53	1.08	1	0.29	1.45	2.32	0.35	1.03	1.31	9	4	8	2	1	4	3	9	1	0	3	0	9	12	16	2	4	5	2	7	4	1	6	2	Chr02
Glyma.02G025300.Wm82.a2.v1	0.56	0.43	0	0.78	0.73	0	0	0	0	0	0	0	0	0	0	0	1.74	0	0	0	0	0	0	0	1	1	0	1	1	0	0	0	0	0	0	0	0	0	0	0	4	0	0	0	0	0	0	0	Chr02
Glyma.02G025400.Wm82.a2.v1	4.18	4.79	0.79	0.73	2.71	0.48	0	2.01	0.75	0	1.16	0	4.92	5.89	5.65	0	0.81	2.13	1.74	1.25	0	0.52	0.52	0	8	12	1	1	4	1	0	8	2	0	2	0	7	18	28	0	2	7	8	4	0	1	2	0	Chr02
Glyma.02G025500.Wm82.a2.v1	5.26	5.23	4	5.14	4.78	6.8	5.77	6.82	4.51	1.21	2.92	3.43	4.25	8.24	4.88	3.63	5.33	5.2	3.5	5.68	2.65	0.53	2.1	1	10	13	5	7	7	14	14	27	12	2	5	2	6	25	24	9	13	17	16	18	3	1	8	1	Chr02
Glyma.02G025600.Wm82.a2.v1	15.99	15.29	15.8	16.76	11.42	8.12	13.16	18.45	11.43	6.47	8	7.81	23.68	18.05	17.61	22.07	16.21	18.61	15.29	12.47	8.05	8.79	8.78	9.12	20	25	13	15	11	11	21	48	20	7	9	3	22	36	57	36	26	40	46	26	6	11	22	6	Chr02
Glyma.02G025700.Wm82.a2.v1	0	0	0	0	0.8	0	0.49	0	0	0	0	0	0	0.39	0.24	0	0	0	0.26	0.37	0	0	0	0	0	0	0	0	1	0	1	0	0	0	0	0	0	1	1	0	0	0	1	1	0	0	0	0	Chr02
Glyma.02G025800.Wm82.a2.v1	8.79	11.77	10.02	0	8.56	0	5.17	1.06	1.57	0	2.44	7.16	2.96	9.64	17.83	3.37	5.14	5.11	5.48	1.32	3.69	2.2	3.29	4.18	4	7	3	0	3	0	3	1	1	0	1	1	1	7	21	2	3	4	6	1	1	1	3	1	Chr02
Glyma.02G025900.Wm82.a2.v1	21.61	30.48	30.28	40.28	33.55	23.48	21.25	25.26	19.38	11.26	9.9	23.47	24.53	37.99	30.46	26.97	29.08	27.37	19.03	19.32	24.19	14.83	11.63	12.09	51	94	47	68	61	60	64	124	64	23	21	17	43	143	186	83	88	111	108	76	34	35	55	15	Chr02
Glyma.02G026000.Wm82.a2.v1	8.78	3.95	1.57	3.61	9.39	7.15	2.43	5.96	4.06	1.79	1.72	0	11.82	9.07	12.18	7.13	6.45	6.01	5.37	5.27	4.34	2.07	2.32	0	17	10	2	5	14	15	6	24	11	3	3	0	17	28	61	18	16	20	25	17	5	4	9	0	Chr02
Glyma.02G026300.Wm82.a2.v1	5.14	9.99	10.23	13.83	20.54	15.71	7.13	15.03	12.16	7.77	9.24	6.44	13.31	14.14	9.94	15.47	16.35	12.66	5.26	7.6	4.65	7.91	5.73	7.52	13	33	17	25	40	43	23	79	43	17	21	5	25	57	65	51	53	55	32	32	7	20	29	10	Chr02
Glyma.02G026400.Wm82.a2.v1	2.36	5.43	0.9	4.13	7.67	8.18	1.39	6.82	2.96	1.37	0.66	0	11.93	5.56	4.8	3.63	8.3	4.47	3.93	5.32	1.98	1.18	0.88	0	4	12	1	5	10	15	3	24	7	2	1	0	15	15	21	8	18	13	16	15	2	2	3	0	Chr02
Glyma.02G026600.Wm82.a2.v1	4.54	2.92	9.44	0.67	0.62	0.44	0.75	1.15	0.17	0.28	0.53	0	4.18	5.54	6.37	2.01	1.49	1.94	0.6	1	0.4	0	0.36	0.45	19	16	26	2	2	2	4	10	1	1	2	0	13	37	69	11	8	14	6	7	1	0	3	1	Chr02
Glyma.02G026700.Wm82.a2.v1	2.78	3.19	5.19	4.41	4.1	3.15	2.97	3.58	2.53	1.02	1.12	2.47	4.42	3.33	4.25	4.07	4.53	4.63	4.04	4.62	4.24	1.39	2.4	2.4	22	33	27	25	25	27	30	59	28	7	8	6	26	42	87	42	46	63	77	61	20	11	38	10	Chr02
Glyma.02G026800.Wm82.a2.v1	33.12	38.17	26.73	33.15	37.68	32.85	12.49	26.14	16.66	3.31	6.37	5.33	37.98	41.27	37.29	35.12	41.77	31.4	24.82	13.98	6.18	2.86	7.75	7.77	81	122	43	58	71	87	39	133	57	7	14	4	69	161	236	112	131	132	146	57	9	7	38	10	Chr02
Glyma.02G026900.Wm82.a2.v1	2.88	4.13	0	5.03	4.2	3.99	1.69	3.46	2.57	1.25	1.6	1.17	5.81	4.74	6.26	0.83	3.09	3.35	1.2	2.16	2.42	1.08	0.54	1.37	8	15	0	10	9	12	6	20	10	3	4	1	12	21	45	3	11	16	8	10	4	3	3	2	Chr02
Glyma.02G027000.Wm82.a2.v1	1.94	0	0	0	0.63	0	0	0.47	0	0	0	0	0	2.44	1.13	0	0	0.28	1.41	0	0	0	0.24	0	4	0	0	0	1	0	0	2	0	0	0	0	0	8	6	0	0	1	7	0	0	0	1	0	Chr02
Glyma.02G027100.Wm82.a2.v1	3.73	3.39	4.61	3.26	3.64	5.6	2.19	4.49	4	1.62	0.78	0.76	4.08	3.37	3.34	5.01	4.37	3.94	4.17	4.48	6.27	1.4	1.63	0.89	16	19	13	10	12	26	12	40	24	6	3	1	13	23	37	28	24	29	43	32	16	6	14	2	Chr02
Glyma.02G027200.Wm82.a2.v1	0	0	0	0	0	0	0	0	0	0	0.26	0	0	0.14	0	0	0	0.13	0	0.28	0	0	0	0	0	0	0	0	0	0	0	0	0	0	1	0	0	1	0	0	0	1	0	2	0	0	0	0	Chr02
Glyma.02G027400.Wm82.a2.v1	22.47	33.86	31.05	38.07	53.03	12.57	8.54	17.02	5.84	6.29	8.33	13.31	34.82	24.76	15.79	26.11	23.89	13.07	5.38	4.49	11.43	6.13	4.76	3.88	33	65	30	40	60	20	16	52	12	8	11	6	38	58	60	50	45	33	19	11	10	9	14	3	Chr02
Glyma.02G027500.Wm82.a2.v1	1.6	3.26	5.66	8.92	5.52	5.4	7.92	4.86	6.84	6.15	2.37	5.2	7.16	2	1.44	2.86	5.81	5.26	4.64	6.38	7.14	3.19	3.45	2.02	3	8	7	12	8	11	19	19	18	10	4	3	10	6	7	7	14	17	21	20	8	6	13	2	Chr02
Glyma.02G027600.Wm82.a2.v1	10.75	7.52	12.61	11.59	9.97	11.63	6.5	6.5	7.24	3.9	3.76	4	4.55	6.36	8.67	6.6	10.06	7.86	5.62	5.9	3.61	3.07	4.75	0.58	35	32	27	27	25	41	27	44	33	11	11	4	11	33	73	28	42	44	44	32	7	10	31	1	Chr02
Glyma.02G028000.Wm82.a2.v1	1.7	12.17	0	0	0	0	0	0	0	0	0	0	21.41	54.49	18.22	0	0	0	0	0	0	0	0	0	3	28	0	0	0	0	0	0	0	0	0	0	28	153	83	0	0	0	0	0	0	0	0	0	Chr02
Glyma.02G028100.Wm82.a2.v1	0	0	0	0	0	0	0	0	0	0	0	0	0	0.3	0	0	0	0	0	0	0	0	0	0	0	0	0	0	0	0	0	0	0	0	0	0	0	1	0	0	0	0	0	0	0	0	0	0	Chr02
Glyma.02G028200.Wm82.a2.v1	312.2	488.78	9.83	0	0	0.43	0	0	0	0	0	0	0	0	0	0	0	0	0	0	0	0	0	0	676	1383	14	0	0	1	0	0	0	0	0	0	0	0	0	0	0	0	0	0	0	0	0	0	Chr02
Glyma.02G028400.Wm82.a2.v1	0.9	1.38	1.37	47.83	45.59	39.08	58.57	6.49	6.44	19.77	35.06	14.67	1.21	2.82	1.04	0	0	0	0	1.08	1.51	0	0	0	1	2	1	38	39	47	83	15	10	19	35	5	1	5	3	0	0	0	0	2	1	0	0	0	Chr02
Glyma.02G028700.Wm82.a2.v1	0	0	0	0	0	0	0.2	0	0	0	0	0.85	7.73	19.3	11.39	0	0	0.3	0	0	0	0	0	0	0	0	0	0	0	0	1	0	0	0	0	1	22	118	113	0	0	2	0	0	0	0	0	0	Chr02
Glyma.02G028800.Wm82.a2.v1	0	0.59	0	1.07	1	0	1.2	0	0.55	0	0	0	0	0	0.3	0.29	0	0	0	0	0	0	0.38	0	0	2	0	2	2	0	4	0	2	0	0	0	0	0	2	1	0	0	0	0	0	0	2	0	Chr02
Glyma.02G029200.Wm82.a2.v1	0	0	0.65	0.6	0	0	0	0	0.61	0	0.48	0	0.58	1.07	1.32	0.33	0.33	0	0.71	0.26	0	0.43	0.21	0	0	0	1	1	0	0	0	0	2	0	1	0	1	4	8	1	1	0	4	1	0	1	1	0	Chr02
Glyma.02G029300.Wm82.a2.v1	12.44	7.82	18.24	21.11	15.57	18.05	8.01	12.6	4.13	5.13	5.93	8.68	8.97	10.86	7.9	11.58	12.13	11.89	8.31	9.86	8.2	3.11	6.87	3.38	28	23	27	34	27	44	23	59	13	10	12	6	15	39	46	34	35	46	45	37	11	7	31	4	Chr02
Glyma.02G029400.Wm82.a2.v1	0.67	0	0	0	0	0	0	0	0	0	0	0	0	0	0	0	0	0	0	0	0	0	0	0	1	0	0	0	0	0	0	0	0	0	0	0	0	0	0	0	0	0	0	0	0	0	0	0	Chr02
Glyma.02G029500.Wm82.a2.v1	0	0	0	1.54	0	2.04	0.86	1.06	1.58	0	0	0	0	0	0	1.69	0	0	1.84	5.3	1.85	2.21	1.65	2.1	0	0	0	1	0	2	1	2	2	0	0	0	0	0	0	2	0	0	4	8	1	2	3	1	Chr02
Glyma.02G029600.Wm82.a2.v1	22.49	15.27	14.34	30.43	30.14	25.79	17.34	19.53	16.85	7.96	9.68	11.82	16.6	17.29	20.75	26.99	26.88	24.48	15.69	17.85	21.32	8.7	10.14	14.49	62	55	26	60	64	77	61	112	65	19	24	10	34	76	148	97	95	116	104	82	35	24	56	21	Chr02
Glyma.02G029800.Wm82.a2.v1	1.8	2.99	1.83	2.52	3.12	5.28	1.89	3.61	0.86	0.35	1	3.92	1.62	2.64	2.44	3.46	2.58	4.2	1.88	1.8	1.01	0	0.6	0	6	13	4	6	8	19	8	25	4	1	3	4	4	14	21	15	11	24	15	10	2	0	4	0	Chr02
Glyma.02G029900.Wm82.a2.v1	0	0	0	0	0	0	0	0	0	0	0	0	0	0.82	0.67	0	0	0	0	0	0	0	0	0	0	0	0	0	0	0	0	0	0	0	0	0	0	3	4	0	0	0	0	0	0	0	0	0	Chr02
Glyma.02G030100.Wm82.a2.v1	5.27	2.69	6.01	1.23	3.42	5.27	3.79	3.38	3.77	2.03	1.95	0	5.32	6.33	4.41	5.39	4.11	2.56	2.74	2.11	5.9	1.32	1.75	2.51	12	8	9	2	6	13	11	16	12	4	4	0	9	23	26	16	12	10	15	8	8	3	8	3	Chr02
Glyma.02G030200.Wm82.a2.v1	13.15	11.02	8.57	2.63	4.47	15.61	15.7	14.75	12.31	4.34	18.81	0	5.9	14.13	7.38	13.45	26.62	18.03	18.88	15.59	9.99	4.7	26.56	10.72	42	46	18	6	11	54	64	98	55	12	54	0	14	72	61	56	109	99	145	83	19	15	170	18	Chr02
Glyma.02G030300.Wm82.a2.v1	0.61	0	0	0	0	1.12	0	0	0	0	0	0	1.63	0	0.47	0.46	0	0	0	0	0	0	0	0	1	0	0	0	0	2	0	0	0	0	0	0	2	0	2	1	0	0	0	0	0	0	0	0	Chr02
Glyma.02G030500.Wm82.a2.v1	0.81	0	0	1.7	1.58	0	0	0.2	1.16	0	0.45	0	2.73	0.76	1.1	0.62	0.32	0	0	0	0	0	0.41	0	2	0	0	3	3	0	0	1	4	0	1	0	5	3	7	2	1	0	0	0	0	0	2	0	Chr02
Glyma.02G030700.Wm82.a2.v1	0.21	0	0	0	0	0.4	0	0.62	0.15	0.5	0	0	0	0	0.41	0	0	0	0.18	0.26	0	0.21	0.11	0	1	0	0	0	0	2	0	6	1	2	0	0	0	0	5	0	0	0	2	2	0	1	1	0	Chr02
Glyma.02G030800.Wm82.a2.v1	8.76	12.93	2.85	7	0.81	0.58	0	0.9	0	0	0	0	21.06	18.44	25.63	0	0	0.36	1.04	0	0	0	0.31	0	14	27	3	8	1	1	0	3	0	0	0	0	25	47	106	0	0	1	4	0	0	0	1	0	Chr02
Glyma.02G030900.Wm82.a2.v1	18.74	23.75	19.59	26.2	31.93	28.66	14.69	28.44	17.16	15.57	13.68	9.54	11.04	21.67	29.66	27.4	30.15	34.76	23.38	16.17	14.75	10.54	16.08	16.71	32	53	22	32	42	53	32	101	41	23	21	5	14	59	131	61	66	102	96	46	15	18	55	15	Chr02
Glyma.02G031000.Wm82.a2.v1	3.5	2.68	0	5.78	4.13	2.06	0	2.14	1.14	0	0.35	0	3.43	5.19	4.43	1.46	4.22	3.33	1.59	0.57	0.53	0	0.16	0.6	11	11	0	13	10	7	0	14	5	0	1	0	8	26	36	6	17	18	12	3	1	0	1	1	Chr02
Glyma.02G031100.Wm82.a2.v1	0.49	2.24	2.22	0	0	0	0	0	0	0	0	0	0.66	1.83	1.13	0	0.38	0	0	0	0	0	0	0	1	6	3	0	0	0	0	0	0	0	0	0	1	6	6	0	1	0	0	0	0	0	0	0	Chr02
Glyma.02G031200.Wm82.a2.v1	2.68	4.4	0.58	0	0.5	0.35	0	0.37	0	0	0.43	0	5.16	4.57	4.59	1.47	0.6	0.45	0.8	0	0.64	0	0	0	7	15	1	0	1	1	0	2	0	0	1	0	10	19	31	5	2	2	5	0	1	0	0	0	Chr02
Glyma.02G031300.Wm82.a2.v1	5.33	3.74	1.35	0	0	0.41	0.7	0.64	0	1.03	0.49	0	4.19	4.74	3.44	0.34	0	1.55	0.55	0	0	0.44	0	0	12	11	2	0	0	1	2	3	0	2	1	0	7	17	20	1	0	6	3	0	0	1	0	0	Chr02
Glyma.02G031600.Wm82.a2.v1	8.39	7.65	6.08	0.56	0.52	0.37	0	0.58	0.86	0	0	0	6.99	7.02	7.57	0.31	1.87	0.23	1.66	0.24	0	0.8	0.4	1.52	21	25	10	1	1	1	0	3	3	0	0	0	13	28	49	1	6	1	10	1	0	2	2	2	Chr02
Glyma.02G031700.Wm82.a2.v1	5.69	2.31	2.04	0.47	0	0	0.52	0.32	0	0	0	0	3.15	2.52	2.85	0	0.26	0.58	0	0	0	0	0	0	17	9	4	1	0	0	2	2	0	0	0	0	7	12	22	0	1	3	0	0	0	0	0	0	Chr02
Glyma.02G031800.Wm82.a2.v1	7.64	6.46	4.89	2.81	0	0	0	1.16	0.29	0	0.89	0	5.41	5.8	4.97	1.23	3.14	1.17	0.5	0	0	0	0.2	0	19	21	8	5	0	0	0	6	1	0	2	0	10	23	32	4	10	5	3	0	0	0	1	0	Chr02
Glyma.02G031900.Wm82.a2.v1	5.56	7.18	3.17	1.46	1.8	2.89	3	2.17	3.73	2.81	1.16	0	2.34	4.58	4.43	3.73	4.88	1.42	2.6	2.09	1.75	2.08	2.08	1.32	16	27	6	3	4	9	11	13	15	7	3	0	5	21	33	14	18	7	18	10	3	6	12	2	Chr02
Glyma.02G032100.Wm82.a2.v1	0.24	0.74	0	0	0	0.67	0.38	0.35	0	0	0.27	0	0.32	0.15	0.47	0.19	0.38	0.28	0.1	0.14	0	0.24	0	0	1	4	0	0	0	3	2	3	0	0	1	0	1	1	5	1	2	2	1	1	0	1	0	0	Chr02
Glyma.02G032200.Wm82.a2.v1	1.09	2.08	7.87	1.14	0.71	1.01	0.43	0.26	0.78	0	0.61	0	3.3	3.59	4.21	1.25	1.06	1.58	0.45	1.14	0	1.09	0.54	0.52	4	10	19	3	2	4	2	2	4	0	2	0	9	21	40	6	5	10	4	7	0	4	4	1	Chr02
Glyma.02G032300.Wm82.a2.v1	631.32	507.11	336.3	362.51	281.63	244.93	5.31	235.48	1.21	2.94	0.94	2.76	792.84	837.95	897.16	376.97	409.15	309.65	77.87	7.12	8.54	0.85	3.81	0	745	782	261	306	256	313	8	578	2	3	1	1	695	1577	2739	580	619	628	221	14	6	1	9	0	Chr02
Glyma.02G032400.Wm82.a2.v1	0	0	0	0	0	0	0	0	0	0	0	0	1.63	3.03	2.8	2.78	4.72	0.35	1.01	0	0	0	0.3	0	0	0	0	0	0	0	0	0	0	0	0	0	2	8	12	6	10	1	4	0	0	0	1	0	Chr02
Glyma.02G032500.Wm82.a2.v1	1.96	1.13	10.45	6.86	5.1	9.07	10.77	8.73	8.07	20.99	10.92	11.19	0	1.23	2.09	3.39	1.15	4.28	3.47	5.6	6.59	6.87	8.82	11.2	4	3	14	10	8	20	28	37	23	37	20	7	0	4	11	9	3	15	17	19	8	14	36	12	Chr02
Glyma.02G032600.Wm82.a2.v1	1.53	2.34	3.1	0	0	0	0	0	0	0	0	0	1.37	1.6	2.56	0	0	0	0	0	0	0	0	0	3	6	4	0	0	0	0	0	0	0	0	0	2	5	13	0	0	0	0	0	0	0	0	0	Chr02
Glyma.02G032700.Wm82.a2.v1	6.88	13.32	0.62	6.22	6.31	5.98	2.85	5.45	4.92	3.27	1.35	2.64	7.08	7.61	6.26	5.9	5.68	6.59	6.4	2.91	3.4	2.43	4.24	4.62	17	43	1	11	12	16	9	28	17	7	3	2	13	30	40	19	18	28	38	12	5	6	21	6	Chr02
Glyma.02G032800.Wm82.a2.v1	14.77	12.54	11.84	13.89	18.48	18.85	11.37	13.82	13.63	8.07	7.47	2.63	15.19	18.02	14.64	14.63	21.58	15.63	11.84	12.41	9.02	5.91	8.45	5.62	55	61	29	37	53	76	54	107	71	26	25	3	42	107	141	71	103	100	106	77	20	22	63	11	Chr02
Glyma.02G033100.Wm82.a2.v1	3.14	1.72	6.14	3.14	3.49	2.07	4.22	3.67	4.49	4.67	2.99	2.92	6.64	5.34	4.85	2.75	2.8	1.83	2.05	2.15	2.26	4.04	2.91	4.27	7	5	9	5	6	5	12	17	14	9	6	2	11	19	28	8	8	7	11	8	3	9	13	5	Chr02
Glyma.02G033200.Wm82.a2.v1	0.75	0.29	2.29	2.63	6.36	0.7	1.18	3.08	3.23	0	0	0	1.01	0.95	1.6	2.89	3.23	1.75	3.92	1.58	1.9	1.88	1.69	2.15	2	1	4	5	13	2	4	17	12	0	0	0	2	4	11	10	11	8	25	7	3	5	9	3	Chr02
Glyma.02G033300.Wm82.a2.v1	4.86	3.88	3.36	3.39	3.15	6.11	3.11	4.67	3.79	2.3	2.46	2.88	3.86	5.54	6.23	3.89	4.99	3.98	2.2	3.05	3.34	3.53	2.42	1.26	22	23	10	11	11	30	18	44	24	9	10	4	13	40	73	23	29	31	24	23	9	16	22	3	Chr02
Glyma.02G033400.Wm82.a2.v1	27.18	19.02	14.11	19	22.81	11.33	6.49	14.18	9.48	2.3	2.95	2.16	28.11	28.68	20.37	27.96	27.15	13.31	8.13	5.37	6.12	3.65	3.31	3.15	82	75	28	41	53	37	25	89	40	6	8	2	63	138	159	110	105	69	59	27	11	11	20	5	Chr02
Glyma.02G033500.Wm82.a2.v1	3.11	2.72	10.47	6.52	2.02	2.87	0.87	2.46	0.48	0.51	0	0	5.68	3.9	4.21	4.26	3.81	2.2	1.11	1.33	2.24	0.44	0.89	1.27	14	16	31	21	7	14	5	23	3	2	0	0	19	28	49	25	22	17	12	10	6	2	8	3	Chr02
Glyma.02G033600.Wm82.a2.v1	0.32	1.48	1.96	10.8	3.76	2.68	0.76	3.4	0.92	0.37	0.36	1.05	0.87	0.4	0.75	4.2	6.78	1.12	1.74	1.74	1.08	0.97	1.12	1.22	1	6	4	24	9	9	3	22	4	1	1	1	2	2	6	17	27	6	13	9	2	3	7	2	Chr02
Glyma.02G033700.Wm82.a2.v1	0.65	0	0.99	1.83	1.7	1.21	4.1	1.89	0	1.51	0	0	0	0.41	0	0.5	1.02	4.18	1.36	1.57	1.1	0.65	0	0	1	0	1	2	2	2	8	6	0	2	0	0	0	1	0	1	2	11	5	4	1	1	0	0	Chr02
Glyma.02G033900.Wm82.a2.v1	31.02	35.61	40.66	44.87	50.69	46.43	43.59	49.37	56.96	25.34	16.66	38.34	34.56	28.51	26.26	87.38	74.26	62.56	45.15	40.76	72.75	21.39	28.29	24.41	58	87	50	60	73	94	104	192	149	41	28	22	48	85	127	213	178	201	203	127	81	40	106	24	Chr02
Glyma.02G034000.Wm82.a2.v1	2.25	2.46	7.34	20.25	3.34	0.59	0.5	1.7	1.61	0.37	0.36	0	5.63	3.63	5.1	1.23	0.5	1.69	1.47	1.93	0.54	0	0.64	1.22	7	10	15	45	8	2	2	11	7	1	1	0	13	18	41	5	2	9	11	10	1	0	4	2	Chr02
Glyma.02G034200.Wm82.a2.v1	0	0	0	0	0.37	0	0.23	0	0	0	0	0	0	0	0	0	0	0.17	0	0	0	0	0	0	0	0	0	0	1	0	1	0	0	0	0	0	0	0	0	0	0	1	0	0	0	0	0	0	Chr02
Glyma.02G034300.Wm82.a2.v1	7.58	5.8	9.21	8.74	7.87	8.74	7.72	10.93	7.72	4.6	7.37	9.87	8.16	8.91	9.22	8.86	8.72	8.04	7.95	10.91	10.49	8.14	8.22	12.61	40	40	32	33	32	50	52	120	57	21	35	16	32	75	126	61	59	73	101	96	33	43	87	35	Chr02
Glyma.02G034400.Wm82.a2.v1	3.52	1.66	6.99	6.43	1.76	1.5	1.7	1.43	1.35	0	0	0	1.09	1.36	2.61	0.62	2.53	1.1	1.58	1.3	1.36	0.27	0.14	0	13	8	17	17	5	6	8	11	7	0	0	0	3	8	25	3	12	7	14	8	3	1	1	0	Chr02
Glyma.02G034500.Wm82.a2.v1	0.64	1.72	0	2.69	1.66	1.48	0	0.77	0.23	0	0.36	0	0	0.8	0.5	0.49	2	1.3	0.27	0.19	0	0	0	0	2	7	0	6	4	5	0	5	1	0	1	0	0	4	4	2	8	7	2	1	0	0	0	0	Chr02
Glyma.02G034600.Wm82.a2.v1	13.62	15.94	3.65	20.16	17.68	20.72	8.16	14.64	14.89	5.55	9.8	7.83	10.79	21.1	13.01	12.29	19.37	10.72	10.33	10.1	4.04	7.21	4	6.09	17	26	3	18	17	28	13	38	26	6	11	3	10	42	42	20	31	23	31	21	3	9	10	4	Chr02
Glyma.02G034700.Wm82.a2.v1	20.91	24.21	8.15	4.12	3.48	1.73	2.31	6.06	1.53	0.93	0.89	2.62	22.74	39.17	31.82	6.38	3.97	6.24	4.46	3.06	0	1.07	0.54	0	78	118	20	11	10	7	11	47	8	3	3	3	63	233	307	31	19	40	40	19	0	4	4	0	Chr02
Glyma.02G034800.Wm82.a2.v1	71.31	69.8	70.61	81.15	97.96	70.45	46.14	72.96	49.19	37.37	44.27	32.42	87.07	72.79	81.41	94.13	95.08	71.41	49.99	55.73	65.44	32.33	31.86	31.54	86	110	56	70	91	92	71	183	83	39	48	12	78	140	254	148	147	148	145	112	47	39	77	20	Chr02
Glyma.02G034900.Wm82.a2.v1	35.81	44.47	41.1	50.07	55.27	41.81	31.24	49.06	35.26	22.65	19.54	17.61	48.21	36.86	33.96	59.6	59.56	49.15	30.06	38.12	37.44	13.51	22.26	26.99	53	86	40	53	63	67	59	151	73	29	26	8	53	87	130	115	113	125	107	94	33	20	66	21	Chr02
Glyma.02G035000.Wm82.a2.v1	5.12	2.49	1.42	24.09	23.58	13.76	7.66	16.57	8.99	5.92	7.77	1.52	5.64	6.72	1.98	13.57	10.17	16.26	9.68	15.93	12.51	6.05	10.46	8.86	11	7	2	37	39	32	21	74	27	11	15	1	9	23	11	38	28	60	50	57	16	13	45	10	Chr02
Glyma.02G035200.Wm82.a2.v1	2.14	2.46	0	0.75	0	1.98	1.26	2.32	0.38	2.47	1.19	1.74	8.65	2.01	2.69	2.05	0.84	0.62	2.23	0.32	0	1.07	1.34	0	4	6	0	1	0	4	3	9	1	4	2	1	12	6	13	5	2	2	10	1	0	2	5	0	Chr02
Glyma.02G035400.Wm82.a2.v1	5.07	26.61	4.41	11.14	20.69	4.01	2.27	6.97	2.07	5.02	4.03	0	11.7	16.35	10.92	13.34	9.61	12.22	3.31	5.22	3.65	2.17	2.53	8.27	7	48	4	11	22	6	4	20	4	6	5	0	12	36	39	24	17	29	11	12	3	3	7	6	Chr02
Glyma.02G035600.Wm82.a2.v1	217.02	238.13	120.82	223.11	225.39	260.22	156.46	201.93	151.29	100.31	127.01	167.51	271.47	250.8	251.14	242.25	254.17	234.67	197.12	161.48	220.88	99.47	126.96	107.94	325	466	119	239	260	422	299	629	317	130	171	77	302	599	973	473	488	604	710	403	197	149	381	85	Chr02
Glyma.02G035700.Wm82.a2.v1	0	0	0	0	0	0	0	0	0	0.4	0.39	0	0	0.22	0	0	0	0	0	0.21	0	0.35	0.17	0.66	0	0	0	0	0	0	0	0	0	1	1	0	0	1	0	0	0	0	0	1	0	1	1	1	Chr02
Glyma.02G035800.Wm82.a2.v1	8.66	6.63	6.58	9.51	7.63	6.85	3.39	6.24	2.65	3.22	3.1	5.04	4.16	6.21	7.41	7.12	6.75	4.86	6.3	6.31	8.83	5.26	4.32	4.12	28	28	14	22	19	24	14	42	12	9	9	5	10	32	62	30	28	27	49	34	17	17	28	7	Chr02
Glyma.02G035900.Wm82.a2.v1	38.86	41.99	34.76	59.13	78.65	57	43	64.85	41.67	14.53	16.53	7.45	43.09	48.02	41.09	63.12	74.9	62.52	48.48	46.64	38.39	24	29.09	30.43	34	48	20	37	53	54	48	118	51	11	13	2	28	67	93	72	84	94	102	68	20	21	51	14	Chr02
Glyma.02G036000.Wm82.a2.v1	203.09	201.98	62.96	183.24	197.74	337.51	148.71	256.22	132.28	119.01	171.03	59.83	124.58	219.47	169.81	126.21	228.63	257.08	191.34	172.21	107.62	61.92	109.79	83.54	564	733	115	364	423	1015	527	1480	514	286	427	51	257	972	1220	457	814	1227	1278	797	178	172	611	122	Chr02
Glyma.02G036100.Wm82.a2.v1	6	3.32	3.55	4.66	3.9	3.08	3.66	4.97	1.91	2.31	2.23	2.17	4.94	5.65	5.16	3.84	3.38	3.11	2.08	1.8	1.68	2.33	1.66	2.54	18	13	7	10	9	10	14	31	8	6	6	2	11	27	40	15	13	16	15	9	3	7	10	4	Chr02
Glyma.02G036200.Wm82.a2.v1	0	1.74	1.73	0	2.22	2.63	0	2.74	2.03	3.29	1.27	1.85	1.53	1.78	1.32	0	3.11	0.99	1.18	3.41	1.91	1.14	1.14	2.16	0	4	2	0	3	5	0	10	5	5	2	1	2	5	6	0	7	3	5	10	2	2	4	2	Chr02
Glyma.02G036300.Wm82.a2.v1	88.16	77.66	38.72	62.44	67.65	65.13	25.18	56.32	27.44	12.22	18.3	12.76	84.92	92.87	115.4	58.3	66.32	58.36	40.08	33.15	27.63	11.36	22.29	14.9	225	259	65	114	133	180	82	299	98	27	42	10	161	378	762	194	217	256	246	141	42	29	114	20	Chr02
Glyma.02G036400.Wm82.a2.v1	17.18	14.67	41.3	3.35	3.63	2.95	0.63	2.88	0.86	0.46	0.89	1.3	23.66	13.78	24.86	3.98	3.43	2.32	2.33	1.68	4.02	0.4	1.79	1.52	43	48	68	6	7	8	2	15	3	1	2	1	44	55	161	13	11	10	14	7	6	1	9	2	Chr02
Glyma.02G036500.Wm82.a2.v1	11.97	11.27	11.55	9.01	9.56	11.26	5.77	10.4	9.54	3.19	5.89	0.75	23.54	14.72	14.32	14.47	17.41	14.19	11.96	12.43	12.36	4.37	5.51	3.5	52	64	33	28	32	53	32	94	58	12	23	1	76	102	161	82	97	106	125	90	32	19	48	8	Chr02
Glyma.02G036600.Wm82.a2.v1	0	0	0	0.91	0	0	0	0	1.4	0.76	0	2.13	1.76	0.41	0.76	0.5	0	0.76	0.27	0.78	0	0	0.98	0	0	0	0	1	0	0	0	0	3	1	0	1	2	1	3	1	0	2	1	2	0	0	3	0	Chr02
Glyma.02G036700.Wm82.a2.v1	0.36	1.09	0.54	1.49	0.46	0.99	0.28	0.34	0.25	1.23	0	1.16	2.87	1.56	2.2	0.55	0.28	1.86	0.44	0.85	1.19	0.36	0.71	0.68	1	4	1	3	1	3	1	2	1	3	0	1	6	7	16	2	1	9	3	4	2	1	4	1	Chr02
Glyma.02G036900.Wm82.a2.v1	0.54	0	0.82	0	0	0.5	0	0	0	0	0	0	0	0	0.63	0	0.42	0	0.23	0.65	0.91	0	0.54	0	1	0	1	0	0	1	0	0	0	0	0	0	0	0	3	0	1	0	1	2	1	0	2	0	Chr02
Glyma.02G037000.Wm82.a2.v1	0	0.51	0	0	0.87	0	0	0.32	0	0	0	0	5.38	10.03	7.47	8.69	0.52	7.37	5.54	6.8	7.83	2.67	4.32	8.87	0	1	0	0	1	0	0	1	0	0	0	0	6	24	29	17	1	19	20	17	7	4	13	7	Chr02
Glyma.02G037100.Wm82.a2.v1	0.61	1.87	2.48	3.99	2.12	0.94	1.92	2.84	0.29	0.71	1.13	0.66	2.74	1.66	1.42	2.03	0.64	1.19	1.1	0.86	0.68	0.61	0.81	0.77	3	12	8	14	8	5	12	29	2	3	5	1	10	13	18	13	4	10	13	7	2	3	8	2	Chr02
Glyma.02G037200.Wm82.a2.v1	0	0	0	2.85	1.51	3.5	1.14	3.36	2.08	1.01	0.97	0.95	0	0	0.11	1.12	2.05	1.7	3.51	3.67	2.94	2.91	1.6	0.55	0	0	0	7	4	13	5	24	10	3	3	1	0	0	1	5	9	10	29	21	6	10	11	1	Chr02
Glyma.02G037300.Wm82.a2.v1	0	0	0	0	0	0	0	0	0	0	0	0	0	0	0	0	0	0	0	0.26	0	0	0	0	0	0	0	0	0	0	0	0	0	0	0	0	0	0	0	0	0	0	0	1	0	0	0	0	Chr02
Glyma.02G037400.Wm82.a2.v1	1.09	1.68	1.11	3.57	1.89	1.01	1.43	2.98	1.04	0	0.41	0	0.98	1.37	3.39	1.4	1.71	1.27	1.52	2.85	0.61	1.09	0.91	0.69	3	6	2	7	4	3	5	17	4	0	1	0	2	6	24	5	6	6	10	13	1	3	5	1	Chr02
Glyma.02G037500.Wm82.a2.v1	3.35	1.14	2.26	2.6	0.48	4.46	2.62	2.5	1.86	0.86	0.41	2.42	4	5.59	7.04	3.71	6.09	4.54	2.16	2.68	3.12	1.12	0.37	0.71	9	4	4	5	1	13	9	14	7	2	1	2	8	24	49	13	21	21	14	12	5	3	2	1	Chr02
Glyma.02G037600.Wm82.a2.v1	0	0	0	0	0	0	0	0	0	0	0	0	0	0	0	0	0	0	0	0	0	0	0	0.97	0	0	0	0	0	0	0	0	0	0	0	0	0	0	0	0	0	0	0	0	0	0	0	1	Chr02
Glyma.02G037700.Wm82.a2.v1	10.42	13.59	6.46	13.49	8.52	9.63	11.5	12.25	10.21	6.25	4.72	8.8	19.23	18.15	20.89	15.99	12.35	8.54	8.83	10.42	11.02	5.02	5.97	5.14	27	46	11	25	17	27	38	66	37	14	11	7	37	75	140	54	41	38	55	45	17	13	31	7	Chr02
Glyma.02G037800.Wm82.a2.v1	0	0	0	0	0	0	0	0	0.36	0	0	0	0	0	0	0	0	0	0	0.3	0	0.5	0	0	0	0	0	0	0	0	0	0	1	0	0	0	0	0	0	0	0	0	0	1	0	1	0	0	Chr02
Glyma.02G037900.Wm82.a2.v1	6.73	8.42	3.72	5.98	11.91	8.47	9.11	13.23	3.93	4.24	6.8	0	7.41	9.97	6.15	6.1	8.11	7.12	6.36	3.67	4.11	2.45	3.97	2.33	11	18	4	7	15	15	19	45	9	6	10	0	9	26	26	13	17	20	25	10	4	4	13	2	Chr02
Glyma.02G038000.Wm82.a2.v1	6.78	8.75	3.86	13.02	10.99	16.81	8.63	11.2	11.2	6.85	4.71	6.9	13.68	6.37	4.58	14.94	20.48	12.57	17.43	11.43	9.95	8.89	6.55	10.47	16	27	6	22	20	43	26	55	37	14	10	5	24	24	28	46	62	51	99	45	14	21	31	13	Chr02
Glyma.02G038100.Wm82.a2.v1	11.5	11.2	12.32	8.04	8.14	6.52	4.92	8.04	4.48	2.72	2.62	1.7	16.54	15.4	15.96	10.82	8.36	9.12	5.54	5.18	3.51	3.4	4.7	0.99	44	56	31	22	24	27	24	64	24	9	9	2	47	94	158	54	41	60	51	33	8	13	36	2	Chr02
Glyma.02G038200.Wm82.a2.v1	1.67	0.64	3.81	0	0	0.77	1.96	1.2	0	0	0	0	0	1.57	1.61	1.28	0	0.49	0	0.5	0	0.83	0.42	1.59	2	1	3	0	0	1	3	3	0	0	0	0	0	3	5	2	0	1	0	1	0	1	1	1	Chr02
Glyma.02G038300.Wm82.a2.v1	5.17	6.33	19.91	15.41	9.39	5.41	5.67	9.94	3.45	3.98	4.6	3.37	8.81	6.48	6.66	6.61	10.21	7.02	6.16	4.34	5.78	2.76	3.44	3.28	15	24	38	32	21	17	21	60	14	10	12	3	19	30	50	25	38	35	43	21	10	8	20	5	Chr02
Glyma.02G038400.Wm82.a2.v1	1.37	0.26	0.52	4.3	0.89	1.26	2.68	1.81	0.73	0	0	0	1.84	4.07	1.59	0.79	2.4	1.59	2.7	1.03	0	0.34	0.85	0	4	1	1	9	2	4	10	11	3	0	0	0	4	19	12	3	9	8	19	5	0	1	5	0	Chr02
Glyma.02G038500.Wm82.a2.v1	4.65	2.67	4.24	2.6	2.71	1.72	0.55	1.12	1.16	0	0.52	0	4.69	4.81	5.39	2.67	2.54	1.76	1.26	0.42	0.78	0	0.46	3.09	20	15	12	8	9	8	3	10	7	0	2	0	15	33	60	15	14	13	13	3	2	0	4	7	Chr02
Glyma.02G038700.Wm82.a2.v1	73.13	80.57	75.73	87.26	89.21	136.23	121.54	119.12	115.8	88.16	135.35	100.64	71.29	91.32	60.92	94.78	118.51	134.26	110.88	97.99	120.68	68.08	84	83.93	116	167	79	99	109	234	246	393	257	121	193	49	84	231	250	196	241	366	423	259	114	108	267	70	Chr02
[truncated: 39,040 more rows]
[truncated: 11 more columns]
