# Supplementary material for: Using transcriptomic and metabolomic data to investigate the molecular mechanisms that determine protein and oil contents during seed development in soybean
Source: Front Plant Sci. 2022 Sep 29;13:1012394. doi: 10.3389/fpls.2022.1012394 (PMC9557928; doi:10.3389/fpls.2022.1012394)
Supplement: Supplementary file 6 [file Table_6.xlsx]

## Sheet: diff1
Table S6. Differentially expressed genes detected.
ID	Swissprot	log2FoldChange	pvalue	padj	regulated	diff
Glyma.01G142400	RecName: Full=RuBisCO-associated protein;	-11.9543	6.36254e-26	7.2335e-23	down	NPS233-1_vs_NPS233-2
novel.447	RecName: Full=Linoleate 9S-lipoxygenase; EC=1.13.11.58; AltName: Full=Lipoxygenase;	-11.5215	2.73765e-20	1.5562e-17	down	NPS233-1_vs_NPS233-2
Glyma.08G138200	RecName: Full=Inositol-3-phosphate synthase; Short=MIP synthase; EC=5.5.1.4; AltName: Full=Myo-inositol 1-phosphate synthase; Short=IPS; Short=MI-1-P synthase;	-11.378	8.52322e-08	5.21827e-06	down	NPS233-1_vs_NPS233-2
Glyma.04G079600	RecName: Full=BURP domain protein RD22 {ECO:0000303|PubMed:9790599}; AltName: Full=Dehydration-responsive protein RD22 {ECO:0000303|PubMed:8479424}; Flags: Precursor;	-11.2475	7.57534e-07	3.5447e-05	down	NPS233-1_vs_NPS233-2
novel.372	--	-11.2473	0.00399215	0.0394283	down	NPS233-1_vs_NPS233-2
Glyma.02G028200	RecName: Full=Metalloendoproteinase 5-MMP {ECO:0000303|PubMed:10574937}; Short=At5-MMP {ECO:0000303|PubMed:10574937}; EC=3.4.24.- {ECO:0000305}; Flags: Precursor;	-10.5933	1.10333e-07	6.51306e-06	down	NPS233-1_vs_NPS233-2
Glyma.08G200100	RecName: Full=Stem 31 kDa glycoprotein; AltName: Full=Vegetative storage protein B; Flags: Precursor;	-10.3917	1.27299e-129	3.90757e-125	down	NPS233-1_vs_NPS233-2
Glyma.20G142000	RecName: Full=Thiamine thiazole synthase 2, chloroplastic {ECO:0000255|HAMAP-Rule:MF_03158}; AltName: Full=Thiazole biosynthetic enzyme 2 {ECO:0000255|HAMAP-Rule:MF_03158}; Flags: Precursor;	-10.2631	3.62321e-16	1.10117e-13	down	NPS233-1_vs_NPS233-2
Glyma.08G271600	--	-10.1473	4.16131e-15	1.06531e-12	down	NPS233-1_vs_NPS233-2
Glyma.12G109800	RecName: Full=(R,S)-reticuline 7-O-methyltransferase {ECO:0000303|PubMed:14675446}; Short=7OMT {ECO:0000303|PubMed:14675446}; EC=2.1.1.291 {ECO:0000269|PubMed:14675446};	-10.0179	4.19118e-07	2.12649e-05	down	NPS233-1_vs_NPS233-2
Glyma.20G158700	RecName: Full=Lectin; AltName: Full=Agglutinin; AltName: Full=BMA; Contains: RecName: Full=Lectin beta chain; Contains: RecName: Full=Lectin alpha chain;	-9.97709	1.97847e-14	4.56626e-12	down	NPS233-1_vs_NPS233-2
Glyma.03G252700	RecName: Full=GDSL esterase/lipase At5g33370; EC=3.1.1.-; AltName: Full=Extracellular lipase At5g33370; Flags: Precursor;	-9.80248	8.58529e-07	3.88693e-05	down	NPS233-1_vs_NPS233-2
Glyma.15G119500	RecName: Full=Hydrophobic seed protein; Short=HPS; AltName: Allergen=Gly m 1;	-9.74816	9.21104e-25	9.74973e-22	down	NPS233-1_vs_NPS233-2
Glyma.10G042500	RecName: Full=GDSL esterase/lipase At4g28780; EC=3.1.1.-; AltName: Full=Extracellular lipase At4g28780; Flags: Precursor;	-9.74537	3.56088e-07	1.8309e-05	down	NPS233-1_vs_NPS233-2
Glyma.18G023600	RecName: Full=Laccase-5; EC=1.10.3.2; AltName: Full=Benzenediol:oxygen oxidoreductase 5; AltName: Full=Diphenol oxidase 5; AltName: Full=Urishiol oxidase 5; Flags: Precursor;	-9.70084	4.67377e-12	7.17331e-10	down	NPS233-1_vs_NPS233-2
Glyma.04G169600	RecName: Full=Gibberellin-regulated protein 4; AltName: Full=GAST1 protein homolog 4; Flags: Precursor;	-9.62399	1.62582e-05	0.000467723	down	NPS233-1_vs_NPS233-2
Glyma.16G209100	RecName: Full=Putative UPF0481 protein At3g02645;	-9.46783	9.44521e-14	1.96561e-11	down	NPS233-1_vs_NPS233-2
Glyma.07G115400	RecName: Full=Patatin-like protein 1; Short=AtPLP1; EC=3.1.1.-; AltName: Full=Patatin-related phospholipase A IIgamma; Short=pPLAIIg; AltName: Full=Phospholipase A IVA; Short=AtPLAIVA;	-9.37042	2.40024e-28	3.87777e-25	down	NPS233-1_vs_NPS233-2
Glyma.18G057900	RecName: Full=Cinnamoyl-CoA reductase 1; Short=AtCCR1; EC=1.2.1.44; AltName: Full=Protein IRREGULAR XYLEM 4;	-9.24977	1.11542e-13	2.28259e-11	down	NPS233-1_vs_NPS233-2
Glyma.07G181200	--	-9.23908	9.99731e-12	1.43401e-09	down	NPS233-1_vs_NPS233-2
Glyma.17G069200	RecName: Full=WAT1-related protein At4g28040;	-9.14937	3.39377e-13	6.59336e-11	down	NPS233-1_vs_NPS233-2
Glyma.18G197800	RecName: Full=Glycerol-3-phosphate 2-O-acyltransferase 6; Short=AtGPAT6; EC=2.3.1.198; AltName: Full=Glycerol-3-phosphate acyltransferase 6;	-9.07236	6.08832e-13	1.13265e-10	down	NPS233-1_vs_NPS233-2
Glyma.05G007100	RecName: Full=Carbonic anhydrase, chloroplastic; EC=4.2.1.1; AltName: Full=Carbonate dehydratase; Contains: RecName: Full=Carbonic anhydrase, 27 kDa isoform; Contains: RecName: Full=Carbonic anhydrase, 25 kDa isoform; Flags: Precursor;	-9.06583	1.62041e-11	2.22589e-09	down	NPS233-1_vs_NPS233-2
Glyma.07G014500	RecName: Full=Stem 28 kDa glycoprotein; AltName: Full=Vegetative storage protein A; Flags: Precursor;	-9.0603	3.87234e-44	2.97163e-40	down	NPS233-1_vs_NPS233-2
Glyma.06G205800	RecName: Full=Agamous-like MADS-box protein AGL8; AltName: Full=Floral homeotic protein AGL8; AltName: Full=Transcription factor FRUITFULL;	-9.00431	6.58301e-13	1.2173e-10	down	NPS233-1_vs_NPS233-2
Glyma.18G052600	RecName: Full=Non-specific lipid-transfer protein; Short=LTP; AltName: Allergen=Pru av 3; Flags: Precursor;	-8.98123	0.000233057	0.00413283	down	NPS233-1_vs_NPS233-2
Glyma.19G007700	RecName: Full=Carbonic anhydrase, chloroplastic; EC=4.2.1.1; AltName: Full=Carbonate dehydratase; Contains: RecName: Full=Carbonic anhydrase, 27 kDa isoform; Contains: RecName: Full=Carbonic anhydrase, 25 kDa isoform; Flags: Precursor;	-8.97386	1.71067e-11	2.3338e-09	down	NPS233-1_vs_NPS233-2
Glyma.19G250200	RecName: Full=GDSL esterase/lipase LTL1; EC=3.1.1.-; AltName: Full=Extracellular lipase LTL1; AltName: Full=Lithium-tolerant lipase 1; Short=AtLTL1; Short=Li-tolerant lipase 1; Flags: Precursor;	-8.96654	5.35993e-05	0.00125403	down	NPS233-1_vs_NPS233-2
Glyma.14G177600	RecName: Full=Blue copper protein; Flags: Precursor;	-8.96438	2.99968e-11	4.02087e-09	down	NPS233-1_vs_NPS233-2
Glyma.03G040300	RecName: Full=Non-specific lipid-transfer protein; Short=LTP; Flags: Precursor;	-8.82681	2.95531e-12	4.77454e-10	down	NPS233-1_vs_NPS233-2
Glyma.11G137500	RecName: Full=Laccase-2; EC=1.10.3.2; AltName: Full=Benzenediol:oxygen oxidoreductase 2; AltName: Full=Diphenol oxidase 2; AltName: Full=Urishiol oxidase 2; Flags: Precursor;	-8.82389	0.0041731	0.0406788	down	NPS233-1_vs_NPS233-2
Glyma.05G057500	RecName: Full=14 kDa proline-rich protein DC2.15; Flags: Precursor;	-8.82177	5.15902e-06	0.000178737	down	NPS233-1_vs_NPS233-2
Glyma.10G139800	RecName: Full=Germin-like protein subfamily 2 member 4; Flags: Precursor;	-8.77503	2.22277e-10	2.51772e-08	down	NPS233-1_vs_NPS233-2
Glyma.09G040600	RecName: Full=Protein LlR18B; EC=3.1.27.-; AltName: Full=LlPR10.1B;	-8.73949	3.10373e-09	2.72206e-07	down	NPS233-1_vs_NPS233-2
Glyma.10G274400	RecName: Full=3-ketoacyl-CoA synthase 6 {ECO:0000303|PubMed:18465198}; Short=KCS-6 {ECO:0000303|PubMed:18465198}; EC=2.3.1.199 {ECO:0000269|PubMed:10330468}; AltName: Full=Cuticular protein 1 {ECO:0000303|PubMed:10330468}; AltName: Full=Eceriferum 6 {ECO:0000303|PubMed:11041893}; AltName: Full=Very long-chain fatty acid condensing enzyme 6 {ECO:0000303|PubMed:18465198}; Short=VLCFA condensing enz…	-8.71342	1.89508e-10	2.2025e-08	down	NPS233-1_vs_NPS233-2
novel.813	--	-8.71025	8.71732e-39	5.35174e-35	down	NPS233-1_vs_NPS233-2
novel.744	--	-8.66236	1.21444e-11	1.71002e-09	down	NPS233-1_vs_NPS233-2
Glyma.06G081100	RecName: Full=BURP domain protein RD22 {ECO:0000303|PubMed:9790599}; AltName: Full=Dehydration-responsive protein RD22 {ECO:0000303|PubMed:8479424}; Flags: Precursor;	-8.64856	1.94311e-11	2.62757e-09	down	NPS233-1_vs_NPS233-2
Glyma.20G017900	RecName: Full=MLP-like protein 328;	-8.63923	7.28634e-24	7.21489e-21	down	NPS233-1_vs_NPS233-2
Glyma.05G116300	RecName: Full=GDSL esterase/lipase At5g33370; EC=3.1.1.-; AltName: Full=Extracellular lipase At5g33370; Flags: Precursor;	-8.616	1.49435e-11	2.07559e-09	down	NPS233-1_vs_NPS233-2
Glyma.01G160100	RecName: Full=Endochitinase; EC=3.2.1.14; Flags: Precursor;	-8.57095	1.56286e-10	1.85226e-08	down	NPS233-1_vs_NPS233-2
Glyma.15G238600	--	-8.53048	9.20043e-12	1.33847e-09	down	NPS233-1_vs_NPS233-2
Glyma.13G129900	RecName: Full=GDSL esterase/lipase At4g28780; EC=3.1.1.-; AltName: Full=Extracellular lipase At4g28780; Flags: Precursor;	-8.47995	2.60656e-06	0.000101024	down	NPS233-1_vs_NPS233-2
Glyma.05G203000	RecName: Full=Omega-hydroxypalmitate O-feruloyl transferase; EC=2.3.1.188; AltName: Full=Omega-hydroxyacid hydroxycinnamoyltransferase; AltName: Full=Protein ALIPHATIC SUBERIN FERULOYL TRANSFERASE;	-8.46752	1.82492e-09	1.7451e-07	down	NPS233-1_vs_NPS233-2
Glyma.20G008200	RecName: Full=Cytochrome P450 71D11; EC=1.14.-.-; Flags: Fragment;	-8.44916	1.84747e-09	1.76118e-07	down	NPS233-1_vs_NPS233-2
Glyma.06G193800	RecName: Full=Gibberellin-regulated protein 6; AltName: Full=GAST1 protein homolog 6; Flags: Precursor;	-8.40803	1.34702e-06	5.71108e-05	down	NPS233-1_vs_NPS233-2
Glyma.08G070800	RecName: Full=ABC transporter G family member 11; Short=ABC transporter ABCG.11; Short=AtABCG11; AltName: Full=Protein CUTICULAR DEFECT AND ORGAN FUSION 1; AltName: Full=Protein DESPERADO; AltName: Full=Protein PERMEABLE LEAVES 1; AltName: Full=White-brown complex homolog protein 11; Short=AtWBC11;	-8.40528	1.01362e-10	1.2236e-08	down	NPS233-1_vs_NPS233-2
Glyma.19G039700	RecName: Full=Coumaroyl-CoA:anthocyanidin 3-O-glucoside-6''-O-coumaroyltransferase 2; EC=2.3.1.-;	-8.36933	1.72424e-10	2.03567e-08	down	NPS233-1_vs_NPS233-2
Glyma.08G230400	RecName: Full=MLP-like protein 43;	-8.34929	0.000613245	0.00902837	down	NPS233-1_vs_NPS233-2
Glyma.13G315400	--	-8.3103	8.63412e-10	8.83443e-08	down	NPS233-1_vs_NPS233-2
Glyma.18G159700	--	-8.28552	1.76311e-10	2.0688e-08	down	NPS233-1_vs_NPS233-2
Glyma.U041200	--	-8.24777	3.26154e-08	2.24476e-06	down	NPS233-1_vs_NPS233-2
Glyma.04G209700	RecName: Full=Lipase-like PAD4; EC=2.3.1.-; AltName: Full=Protein ENHANCED DISEASE SUSCEPTIBILITY 9; AltName: Full=Protein PHYTOALEXIN DEFICIENT 4; Short=AtPAD4;	-8.23556	1.58353e-08	1.19138e-06	down	NPS233-1_vs_NPS233-2
Glyma.15G238400	RecName: Full=Annexin D4; AltName: Full=AnnAt4;	-8.23516	3.73249e-11	4.91728e-09	down	NPS233-1_vs_NPS233-2
Glyma.20G149700	RecName: Full=E3 ubiquitin-protein ligase SIRP1 {ECO:0000305}; EC=2.3.2.27 {ECO:0000269|PubMed:27118216}; AltName: Full=Salt-induced RING finger protein 1 {ECO:0000303|PubMed:27118216}; Short=OsSIRP1 {ECO:0000303|PubMed:27118216};	-8.22847	1.42593e-08	1.08075e-06	down	NPS233-1_vs_NPS233-2
Glyma.15G239600	--	-8.17947	1.31095e-09	1.3023e-07	down	NPS233-1_vs_NPS233-2
Glyma.16G061400	RecName: Full=Germin-like protein subfamily 1 member 7; Flags: Precursor;	-8.16863	6.13691e-10	6.4293e-08	down	NPS233-1_vs_NPS233-2
Glyma.03G145600	RecName: Full=Peroxidase 15 {ECO:0000303|PubMed:17936696}; Short=Prx15 {ECO:0000303|PubMed:17936696}; EC=1.11.1.7; AltName: Full=Anionic peroxidase {ECO:0000303|PubMed:17936696}; Flags: Precursor;	-8.10902	0.00256409	0.0282023	down	NPS233-1_vs_NPS233-2
Glyma.02G205800	RecName: Full=Cellulose synthase A catalytic subunit 7 [UDP-forming]; Short=AtCesA7; EC=2.4.1.12; AltName: Full=Protein FRAGILE FIBER 5; AltName: Full=Protein IRREGULAR XYLEM 3; Short=AtIRX3;	-8.10163	0.00143518	0.0178502	down	NPS233-1_vs_NPS233-2
Glyma.12G207600	RecName: Full=Fasciclin-like arabinogalactan protein 13; Flags: Precursor;	-8.04283	1.97288e-10	2.27582e-08	down	NPS233-1_vs_NPS233-2
Glyma.13G263800	RecName: Full=Protein SRG1; Short=AtSRG1; AltName: Full=Protein SENESCENCE-RELATED GENE 1;	-8.02927	1.88475e-09	1.78563e-07	down	NPS233-1_vs_NPS233-2
Glyma.15G119200	RecName: Full=Cortical cell-delineating protein; AltName: Full=Root-specific protein ZRP3; Flags: Precursor;	-8.00823	0.000254324	0.00445335	down	NPS233-1_vs_NPS233-2
Glyma.14G018900	--	-7.98023	1.94555e-21	1.4566e-18	down	NPS233-1_vs_NPS233-2
Glyma.06G295700	RecName: Full=(R,S)-reticuline 7-O-methyltransferase {ECO:0000303|PubMed:14675446}; Short=7OMT {ECO:0000303|PubMed:14675446}; EC=2.1.1.291 {ECO:0000269|PubMed:14675446};	-7.978	9.57532e-09	7.59494e-07	down	NPS233-1_vs_NPS233-2
Glyma.08G169000	RecName: Full=LOB domain-containing protein 4; AltName: Full=ASYMMETRIC LEAVES 2-like protein 6; Short=AS2-like protein 6;	-7.96992	3.11965e-08	2.15678e-06	down	NPS233-1_vs_NPS233-2
Glyma.08G293800	--	-7.9569	1.25038e-09	1.2543e-07	down	NPS233-1_vs_NPS233-2
Glyma.02G265700	--	-7.91875	3.22582e-09	2.79717e-07	down	NPS233-1_vs_NPS233-2
Glyma.02G120600	RecName: Full=Primary amine oxidase; EC=1.4.3.21 {ECO:0000250|UniProtKB:P12807}; AltName: Full=Amine oxidase [copper-containing]; Flags: Precursor;	-7.8967	2.12936e-26	2.61451e-23	down	NPS233-1_vs_NPS233-2
Glyma.15G139800	--	-7.89334	1.35082e-14	3.21431e-12	down	NPS233-1_vs_NPS233-2
Glyma.11G044800	RecName: Full=Probable xyloglucan endotransglucosylase/hydrolase protein 6; Short=At-XTH6; Short=XTH-6; EC=2.4.1.207; Flags: Precursor;	-7.86497	2.41314e-09	2.21115e-07	down	NPS233-1_vs_NPS233-2
Glyma.19G130400	RecName: Full=Sigma factor binding protein 2, chloroplastic; Short=Sigma factor binding protein II; AltName: Full=VQ motif-containing protein 16 {ECO:0000303|PubMed:22535423}; Short=AtVQ16 {ECO:0000303|PubMed:22535423}; Flags: Precursor;	-7.8034	5.83543e-10	6.1344e-08	down	NPS233-1_vs_NPS233-2
Glyma.15G141600	--	-7.79444	0.00081197	0.0112474	down	NPS233-1_vs_NPS233-2
Glyma.08G080600	RecName: Full=Berberine bridge enzyme-like 13 {ECO:0000303|PubMed:26037923}; Short=AtBBE-like 13 {ECO:0000303|PubMed:26037923}; EC=1.1.1.194 {ECO:0000269|PubMed:26037923}; EC=1.1.1.195 {ECO:0000269|PubMed:26037923}; Flags: Precursor;	-7.78807	3.21037e-09	2.79166e-07	down	NPS233-1_vs_NPS233-2
Glyma.15G239700	--	-7.76994	3.32052e-08	2.27515e-06	down	NPS233-1_vs_NPS233-2
Glyma.06G100300	RecName: Full=Blue copper protein; Flags: Precursor;	-7.76041	2.29386e-33	5.8677e-30	down	NPS233-1_vs_NPS233-2
Glyma.15G142000	--	-7.74998	1.49395e-07	8.57164e-06	down	NPS233-1_vs_NPS233-2
Glyma.04G230000	--	-7.72081	5.40769e-10	5.70427e-08	down	NPS233-1_vs_NPS233-2
Glyma.13G229700	RecName: Full=Protein LIGHT-DEPENDENT SHORT HYPOCOTYLS 10; AltName: Full=Protein ORGAN BOUNDARY 10;	-7.69351	2.58932e-09	2.32403e-07	down	NPS233-1_vs_NPS233-2
Glyma.08G203000	RecName: Full=Aquaporin TIP2-1; AltName: Full=Delta-tonoplast intrinsic protein; Short=Delta-TIP; AltName: Full=Tonoplast intrinsic protein 2-1; Short=AtTIP2;1; Contains: RecName: Full=Aquaporin TIP2-1, N-terminally processed;	-7.6724	0.000884624	0.0120405	down	NPS233-1_vs_NPS233-2
Glyma.14G084600	RecName: Full=WUSCHEL-related homeobox 4;	-7.6614	5.43706e-09	4.57249e-07	down	NPS233-1_vs_NPS233-2
Glyma.12G195500	RecName: Full=Peroxidase 3; Short=Atperox P3; EC=1.11.1.7; AltName: Full=ATPRC; AltName: Full=RCI3A; AltName: Full=Rare cold-inducible protein; Flags: Precursor;	-7.56843	1.94506e-12	3.29864e-10	down	NPS233-1_vs_NPS233-2
Glyma.15G141900	--	-7.56443	2.32978e-08	1.68667e-06	down	NPS233-1_vs_NPS233-2
Glyma.18G192000	RecName: Full=17.5 kDa class I heat shock protein; AltName: Full=HSP 17.5-E;	-7.55483	0.00203956	0.0235806	down	NPS233-1_vs_NPS233-2
Glyma.01G163100	RecName: Full=Peroxidase 64; Short=Atperox P64; EC=1.11.1.7; AltName: Full=ATP17a; AltName: Full=PRXR4; Flags: Precursor;	-7.53444	7.89238e-11	9.65197e-09	down	NPS233-1_vs_NPS233-2
Glyma.07G057900	RecName: Full=Jasmonic acid-amido synthetase JAR1 {ECO:0000305}; EC=6.3.2.-; AltName: Full=Auxin-responsive GH3-like protein 5 {ECO:0000303|PubMed:15856348}; Short=OsGH3-5 {ECO:0000303|PubMed:15856348}; AltName: Full=Indole-3-acetic acid-amido synthetase GH3.5 {ECO:0000305}; AltName: Full=Jasmonate-amino acid synthetase JAR1 {ECO:0000305}; AltName: Full=Protein JASMONATE RESISTANT 1 {ECO:0000303|…	-7.49998	1.28277e-08	9.90074e-07	down	NPS233-1_vs_NPS233-2
Glyma.20G145300	RecName: Full=Primary amine oxidase; EC=1.4.3.21 {ECO:0000250|UniProtKB:P12807}; AltName: Full=Amine oxidase [copper-containing]; Flags: Precursor;	-7.47531	1.09129e-08	8.52371e-07	down	NPS233-1_vs_NPS233-2
Glyma.01G196800	RecName: Full=Probable xyloglucan endotransglucosylase/hydrolase protein 6; Short=At-XTH6; Short=XTH-6; EC=2.4.1.207; Flags: Precursor;	-7.43428	2.18173e-08	1.59268e-06	down	NPS233-1_vs_NPS233-2
Glyma.07G050600	RecName: Full=NAC domain-containing protein 43; Short=ANAC043; AltName: Full=Protein EMBRYO DEFECTIVE 2301; AltName: Full=Protein NAC SECONDARY WALL THICKENING PROMOTING FACTOR 1;	-7.42881	5.95259e-07	2.86846e-05	down	NPS233-1_vs_NPS233-2
Glyma.13G272300	RecName: Full=Sodium/calcium exchanger NCL {ECO:0000305}; AltName: Full=Na(+)/Ca(2+)-exchange protein NCL {ECO:0000305}; AltName: Full=Protein NCX-like {ECO:0000303|PubMed:23148213}; Short=AtNCL {ECO:0000303|PubMed:23148213};	-7.40241	2.18439e-08	1.59268e-06	down	NPS233-1_vs_NPS233-2
Glyma.15G143900	--	-7.3966	1.23566e-07	7.211e-06	down	NPS233-1_vs_NPS233-2
Glyma.13G356600	RecName: Full=Auxin-responsive protein IAA27; AltName: Full=Auxin-induced protein 27; AltName: Full=Indoleacetic acid-induced protein 27; AltName: Full=Phytochrome-associated protein 2;	-7.37466	3.37654e-08	2.30838e-06	down	NPS233-1_vs_NPS233-2
Glyma.03G121500	RecName: Full=Beta-amyrin synthase; EC=5.4.99.39;	-7.35973	1.33055e-07	7.73514e-06	down	NPS233-1_vs_NPS233-2
Glyma.02G230800	RecName: Full=Protein CHLOROPLAST IMPORT APPARATUS 2; Flags: Precursor;	-7.34202	5.07333e-08	3.34187e-06	down	NPS233-1_vs_NPS233-2
Glyma.02G245600	RecName: Full=Protein RSI-1; AltName: Full=TR132; Flags: Precursor;	-7.33822	2.34974e-11	3.1635e-09	down	NPS233-1_vs_NPS233-2
Glyma.10G251500	RecName: Full=Thiamine thiazole synthase 2, chloroplastic {ECO:0000255|HAMAP-Rule:MF_03158}; AltName: Full=Thiazole biosynthetic enzyme 2 {ECO:0000255|HAMAP-Rule:MF_03158}; Flags: Precursor;	-7.33759	1.23866e-38	6.33697e-35	down	NPS233-1_vs_NPS233-2
Glyma.13G347700	RecName: Full=Linoleate 9S-lipoxygenase-4; EC=1.13.11.58; AltName: Full=Lipoxygenase-4; Short=L-4; AltName: Full=VSP94;	-7.32662	4.29953e-29	7.76343e-26	down	NPS233-1_vs_NPS233-2
Glyma.11G055400	RecName: Full=Phospholipase A1-Igamma2, chloroplastic; EC=3.1.1.-; Flags: Precursor;	-7.27873	2.14852e-07	1.16727e-05	down	NPS233-1_vs_NPS233-2
Glyma.05G023700	RecName: Full=Flavin-containing monooxygenase FMO GS-OX-like 8 {ECO:0000303|PubMed:17461789}; EC=1.8.-.- {ECO:0000305}; AltName: Full=Flavin-monooxygenase glucosinolate S-oxygenase-like 8 {ECO:0000303|PubMed:17461789};	-7.26937	2.36733e-08	1.70982e-06	down	NPS233-1_vs_NPS233-2
Glyma.03G217900	RecName: Full=Zinc finger protein 6 {ECO:0000305};	-7.26265	5.47775e-07	2.66474e-05	down	NPS233-1_vs_NPS233-2
Glyma.18G197400	RecName: Full=Laccase-4; EC=1.10.3.2; AltName: Full=Benzenediol:oxygen oxidoreductase 4; AltName: Full=Diphenol oxidase 4; AltName: Full=Protein IRREGULAR XYLEM 12; AltName: Full=Urishiol oxidase 4; Flags: Precursor;	-7.24842	0.00390156	0.0387706	down	NPS233-1_vs_NPS233-2
Glyma.19G051100	RecName: Full=GDSL esterase/lipase At5g33370; EC=3.1.1.-; AltName: Full=Extracellular lipase At5g33370; Flags: Precursor;	-7.23291	4.0385e-11	5.23062e-09	down	NPS233-1_vs_NPS233-2
Glyma.11G054500	RecName: Full=Caffeoyl-CoA O-methyltransferase 2; EC=2.1.1.104; AltName: Full=Trans-caffeoyl-CoA 3-O-methyltransferase 2; Short=CCoAMT-2; Short=CCoAOMT-2;	-7.23051	6.72804e-07	3.21188e-05	down	NPS233-1_vs_NPS233-2
Glyma.15G011000	--	-7.22965	0.000510759	0.00779238	down	NPS233-1_vs_NPS233-2
Glyma.07G034900	RecName: Full=Linoleate 9S-lipoxygenase 1; EC=1.13.11.58; AltName: Full=Lipoxygenase 1; EC=1.13.11.12;	-7.22254	6.29199e-19	2.79912e-16	down	NPS233-1_vs_NPS233-2
Glyma.09G084900	RecName: Full=14 kDa proline-rich protein DC2.15; Flags: Precursor;	-7.21467	1.35629e-06	5.74243e-05	down	NPS233-1_vs_NPS233-2
Glyma.13G231300	RecName: Full=GDSL esterase/lipase At5g45910; EC=3.1.1.-; AltName: Full=Extracellular lipase At5g45910; Flags: Precursor;	-7.1925	5.36668e-08	3.49736e-06	down	NPS233-1_vs_NPS233-2
Glyma.16G150600	RecName: Full=Omega-hydroxypalmitate O-feruloyl transferase; EC=2.3.1.188; AltName: Full=Omega-hydroxyacid hydroxycinnamoyltransferase; AltName: Full=Protein ALIPHATIC SUBERIN FERULOYL TRANSFERASE;	-7.17622	1.71105e-07	9.6019e-06	down	NPS233-1_vs_NPS233-2
Glyma.19G102700	RecName: Full=Germin-like protein subfamily 1 member 16; Flags: Precursor;	-7.16147	8.37363e-07	3.82495e-05	down	NPS233-1_vs_NPS233-2
Glyma.13G175300	RecName: Full=Protein E6;	-7.13903	6.52978e-17	2.27771e-14	down	NPS233-1_vs_NPS233-2
Glyma.13G283900	RecName: Full=Unknown seed protein USP {ECO:0000303|PubMed:2017140}; Short=VfUSP {ECO:0000303|PubMed:2017140}; Flags: Precursor;	-7.13829	1.23302e-06	5.32331e-05	down	NPS233-1_vs_NPS233-2
Glyma.19G161100	RecName: Full=Auxin-induced protein AUX28;	-7.12194	1.48803e-06	6.19116e-05	down	NPS233-1_vs_NPS233-2
Glyma.01G034000	RecName: Full=MLP-like protein 423;	-7.11794	2.18691e-06	8.68426e-05	down	NPS233-1_vs_NPS233-2
Glyma.05G125800	RecName: Full=Berberine bridge enzyme-like 13 {ECO:0000303|PubMed:26037923}; Short=AtBBE-like 13 {ECO:0000303|PubMed:26037923}; EC=1.1.1.194 {ECO:0000269|PubMed:26037923}; EC=1.1.1.195 {ECO:0000269|PubMed:26037923}; Flags: Precursor;	-7.10641	1.01902e-06	4.50718e-05	down	NPS233-1_vs_NPS233-2
Glyma.13G351600	RecName: Full=Inorganic pyrophosphatase 2; Short=AtPPsPase2; Short=PPi phosphatase 2; Short=Pyrophosphate-specific phosphatase 2; EC=3.6.1.1;	-7.09321	1.08098e-07	6.39522e-06	down	NPS233-1_vs_NPS233-2
Glyma.08G200200	RecName: Full=Stem 28 kDa glycoprotein; AltName: Full=Vegetative storage protein A; Flags: Precursor;	-7.09304	1.40674e-10	1.6737e-08	down	NPS233-1_vs_NPS233-2
Glyma.10G216100	RecName: Full=Gibberellin-regulated protein 3; AltName: Full=GAST1 protein homolog 3; Flags: Precursor;	-7.09168	1.06671e-05	0.000329747	down	NPS233-1_vs_NPS233-2
Glyma.04G104400	RecName: Full=Phosphatidylinositol/phosphatidylcholine transfer protein SFH2; AltName: Full=Protein SEC FOURTEEN HOMOLOGS 2; Short=AtSFH2;	-7.04173	8.29705e-08	5.11418e-06	down	NPS233-1_vs_NPS233-2
Glyma.18G250100	RecName: Full=Subtilisin-like protease Glyma18g48580; EC=3.4.21.-; Contains: RecName: Full=Subtilase peptide GmSubPep; AltName: Full=Glycine max subtilase peptide; Short=GmSubPep; Flags: Precursor;	-7.02704	4.93046e-10	5.2918e-08	down	NPS233-1_vs_NPS233-2
novel.367	--	-7.00736	2.39798e-07	1.28015e-05	down	NPS233-1_vs_NPS233-2
Glyma.15G017500	RecName: Full=Auxin-responsive protein IAA27; AltName: Full=Auxin-induced protein 27; AltName: Full=Indoleacetic acid-induced protein 27; AltName: Full=Phytochrome-associated protein 2;	-7.00038	1.6579e-07	9.37215e-06	down	NPS233-1_vs_NPS233-2
Glyma.14G052100	RecName: Full=Nodulin-16; Short=N-16; Flags: Precursor;	-6.99026	6.80239e-07	3.24233e-05	down	NPS233-1_vs_NPS233-2
Glyma.10G252900	RecName: Full=Cysteine-rich receptor-like protein kinase 25; Short=Cysteine-rich RLK25; EC=2.7.11.-; Flags: Precursor;	-6.96629	8.73987e-07	3.94528e-05	down	NPS233-1_vs_NPS233-2
Glyma.05G114000	RecName: Full=Probable pectate lyase 5; EC=4.2.2.2; Flags: Precursor;	-6.94672	3.86796e-06	0.00014051	down	NPS233-1_vs_NPS233-2
Glyma.14G200900	RecName: Full=Probable O-methyltransferase 3 {ECO:0000303|PubMed:18223037}; Short=HlOMT3 {ECO:0000303|PubMed:18223037}; EC=2.1.1.- {ECO:0000305};	-6.91802	4.62075e-09	3.92904e-07	down	NPS233-1_vs_NPS233-2
Glyma.15G062300	RecName: Full=Basic form of pathogenesis-related protein 1; Short=PRP 1; Flags: Precursor;	-6.86526	4.68385e-07	2.33402e-05	down	NPS233-1_vs_NPS233-2
Glyma.08G257300	RecName: Full=Ethylene-responsive transcription factor ERF115;	-6.85547	6.06293e-07	2.91249e-05	down	NPS233-1_vs_NPS233-2
Glyma.11G049700	--	-6.84511	2.74995e-06	0.000105516	down	NPS233-1_vs_NPS233-2
Glyma.19G024200	RecName: Full=Expansin-A15; Short=AtEXPA15; AltName: Full=Alpha-expansin-15; Short=At-EXP15; Short=AtEx15; AltName: Full=Ath-ExpAlpha-1.3; Flags: Precursor;	-6.82551	7.90155e-13	1.44373e-10	down	NPS233-1_vs_NPS233-2
Glyma.15G026500	RecName: Full=Linoleate 9S-lipoxygenase-4; EC=1.13.11.58; AltName: Full=Lipoxygenase-4; Short=L-4; AltName: Full=VSP94;	-6.7975	1.26383e-49	1.93973e-45	down	NPS233-1_vs_NPS233-2
Glyma.14G050900	RecName: Full=GDSL esterase/lipase At2g04570; EC=3.1.1.-; AltName: Full=Extracellular lipase At2g04570; Flags: Precursor;	-6.79416	1.62323e-09	1.5818e-07	down	NPS233-1_vs_NPS233-2
Glyma.15G089100	RecName: Full=GDSL esterase/lipase At1g29660 {ECO:0000303|PubMed:18819574}; EC=3.1.1.- {ECO:0000305}; AltName: Full=Apoplastic EDS1-dependent protein 3 {ECO:0000303|PubMed:24755512}; AltName: Full=Extracellular lipase At1g29660; Flags: Precursor;	-6.79391	7.64946e-06	0.000248474	down	NPS233-1_vs_NPS233-2
Glyma.06G131000	--	-6.75524	1.81731e-05	0.000510376	down	NPS233-1_vs_NPS233-2
novel.60	--	-6.7519	1.60542e-06	6.58138e-05	down	NPS233-1_vs_NPS233-2
Glyma.17G021400	RecName: Full=Probable uridine nucleosidase 1; EC=3.2.2.3; AltName: Full=Uridine ribohydrolase 1;	-6.7351	1.15844e-06	5.04866e-05	down	NPS233-1_vs_NPS233-2
Glyma.01G081600	RecName: Full=Protein NRT1/ PTR FAMILY 3.1; Short=AtNPF3.1;	-6.73403	2.89378e-05	0.000755979	down	NPS233-1_vs_NPS233-2
Glyma.15G062500	RecName: Full=Pathogenesis-related protein 1 {ECO:0000303|PubMed:11725949}; Short=AtPRB1 {ECO:0000303|PubMed:11725949}; Flags: Precursor;	-6.72777	7.2996e-07	3.43137e-05	down	NPS233-1_vs_NPS233-2
Glyma.15G021700	RecName: Full=LRR receptor-like serine/threonine-protein kinase IOS1 {ECO:0000303|PubMed:21711359}; EC=2.7.11.- {ECO:0000255|PROSITE-ProRule:PRU00159}; AltName: Full=Protein IMPAIRED OOMYCETE SUSCEPTIBILITY 1 {ECO:0000303|PubMed:21711359}; Flags: Precursor;	-6.72603	1.1677e-05	0.00035472	down	NPS233-1_vs_NPS233-2
Glyma.04G252300	RecName: Full=Auxin transporter-like protein 3; AltName: Full=AUX1-like protein 3; AltName: Full=MtLAX3;	-6.71328	1.91827e-11	2.60545e-09	down	NPS233-1_vs_NPS233-2
Glyma.13G237400	RecName: Full=Squamosa promoter-binding protein 1;	-6.69151	3.44112e-12	5.44478e-10	down	NPS233-1_vs_NPS233-2
Glyma.15G025500	RecName: Full=Transcription factor MYB26 {ECO:0000305}; AltName: Full=Myb-related protein 26 {ECO:0000305}; Short=AtMYB26 {ECO:0000303|PubMed:11597504}; AltName: Full=Protein MALE STERILE 35 {ECO:0000303|PubMed:12753590};	-6.68927	1.10076e-05	0.000338227	down	NPS233-1_vs_NPS233-2
Glyma.15G140200	RecName: Full=ATP-citrate synthase beta chain protein 1; Short=ATP-citrate synthase B-1; EC=2.3.3.8; AltName: Full=ATP-citrate lyase B-1; AltName: Full=Citrate cleavage enzyme B-1;	-6.68064	1.36162e-06	5.75708e-05	down	NPS233-1_vs_NPS233-2
Glyma.01G192300	RecName: Full=BTB/POZ domain-containing protein SR1IP1 {ECO:0000305}; AltName: Full=Protein ATSR1-INTERACTION PROTEIN 1 {ECO:0000303|PubMed:24528504};	-6.6791	1.18218e-06	5.11821e-05	down	NPS233-1_vs_NPS233-2
Glyma.02G154500	--	-6.66526	3.2244e-05	0.000827561	down	NPS233-1_vs_NPS233-2
Glyma.11G224600	RecName: Full=Cucumisin; EC=3.4.21.25; AltName: Allergen=Cuc m 1; Flags: Precursor;	-6.66466	2.90919e-19	1.39532e-16	down	NPS233-1_vs_NPS233-2
Glyma.14G197900	RecName: Full=Protein CHLOROPLAST IMPORT APPARATUS 2; Flags: Precursor;	-6.65724	2.42991e-06	9.5496e-05	down	NPS233-1_vs_NPS233-2
Glyma.01G068200	RecName: Full=Protein SRG1; Short=AtSRG1; AltName: Full=Protein SENESCENCE-RELATED GENE 1;	-6.64957	1.23676e-06	5.32447e-05	down	NPS233-1_vs_NPS233-2
Glyma.09G038800	--	-6.64574	9.08444e-06	0.00028927	down	NPS233-1_vs_NPS233-2
Glyma.10G180100	RecName: Full=Auxin-responsive protein IAA14; AltName: Full=Indoleacetic acid-induced protein 14; AltName: Full=Protein SOLITARY ROOT;	-6.64454	5.80803e-06	0.000198313	down	NPS233-1_vs_NPS233-2
Glyma.03G005700	RecName: Full=Probable 2-isopropylmalate synthase; EC=2.3.3.13; AltName: Full=Alpha-IPM synthase; AltName: Full=Alpha-isopropylmalate synthase; AltName: Full=Late nodulin-56; Short=N-56;	-6.64407	9.28598e-06	0.000294161	down	NPS233-1_vs_NPS233-2
novel.816	--	-6.64198	0.000143649	0.00277673	down	NPS233-1_vs_NPS233-2
Glyma.11G051000	RecName: Full=Probable esterase KAI2; AltName: Full=Protein DWARF-14-like; Short=Protein D14-like; AltName: Full=Protein HYPOSENSITIVE TO LIGHT; AltName: Full=Protein KARRIKIN INSENSITIVE 2;	-6.62084	2.82526e-06	0.000107465	down	NPS233-1_vs_NPS233-2
Glyma.10G202300	RecName: Full=Trihelix transcription factor PTL; AltName: Full=Trihelix DNA-binding protein PETAL LOSS;	-6.6186	2.22452e-06	8.8222e-05	down	NPS233-1_vs_NPS233-2
Glyma.03G259100	RecName: Full=Calcium-binding protein KIC; AltName: Full=KCBP-interacting calcium-binding protein;	-6.61809	1.432e-06	6.00501e-05	down	NPS233-1_vs_NPS233-2
Glyma.02G210800	RecName: Full=Protein DMR6-LIKE OXYGENASE 2 {ECO:0000303|PubMed:25376907}; EC=1.14.11.- {ECO:0000255|PROSITE-ProRule:PRU00805}; AltName: Full=2-oxoglutarate (2OG)-Fe(II) oxygenase-like protein DLO2 {ECO:0000303|PubMed:25376907}; AltName: Full=Salicylate 3-hydroxylase DLO2 {ECO:0000305}; Short=S3H DLO2 {ECO:0000305}; Short=SA 3-hydroxylase DLO2 {ECO:0000305}; Short=Salicylic acid 3-hydroxylase DLO…	-6.61432	1.71268e-05	0.000485883	down	NPS233-1_vs_NPS233-2
Glyma.01G040700	RecName: Full=Thioredoxin H2; Short=AtTrxh2; AltName: Full=Thioredoxin 2; Short=AtTRX2;	-6.59467	1.95836e-06	7.87863e-05	down	NPS233-1_vs_NPS233-2
Glyma.14G038500	RecName: Full=Multicystatin; Short=MC;	-6.59227	1.5834e-12	2.746e-10	down	NPS233-1_vs_NPS233-2
Glyma.04G005100	--	-6.58781	2.39748e-12	4.04357e-10	down	NPS233-1_vs_NPS233-2
Glyma.15G239500	--	-6.5779	2.56655e-06	9.9725e-05	down	NPS233-1_vs_NPS233-2
Glyma.02G156800	RecName: Full=Lectin DB58; Contains: RecName: Full=Lectin DB58 subunit alpha; Contains: RecName: Full=Lectin DB58 subunit beta; Flags: Precursor;	-6.57718	2.12225e-48	2.17149e-44	down	NPS233-1_vs_NPS233-2
Glyma.17G127000	RecName: Full=GDSL esterase/lipase At3g48460; EC=3.1.1.-; AltName: Full=Extracellular lipase At3g48460; Flags: Precursor;	-6.5647	4.79649e-09	4.06721e-07	down	NPS233-1_vs_NPS233-2
Glyma.02G058000	RecName: Full=Probable polyol transporter 3;	-6.55874	5.00449e-05	0.00118486	down	NPS233-1_vs_NPS233-2
Glyma.13G083700	RecName: Full=Probable calcium-binding protein CML29; AltName: Full=Calmodulin-like protein 29;	-6.55367	1.65165e-05	0.00047294	down	NPS233-1_vs_NPS233-2
Glyma.12G154300	RecName: Full=Metallothionein-like protein type 3; Short=MT-3; AltName: Full=MWMT3;	-6.54429	1.76871e-14	4.14445e-12	down	NPS233-1_vs_NPS233-2
Glyma.10G252800	RecName: Full=Cysteine-rich receptor-like protein kinase 10; Short=Cysteine-rich RLK10; EC=2.7.11.-; AltName: Full=Receptor-like protein kinase 4; Flags: Precursor;	-6.54188	1.72237e-06	7.02125e-05	down	NPS233-1_vs_NPS233-2
Glyma.20G192700	RecName: Full=Lupeol synthase; Short=GgLUS1; EC=5.4.99.41;	-6.53589	3.00549e-06	0.000113059	down	NPS233-1_vs_NPS233-2
Glyma.11G200100	RecName: Full=Root phototropism protein 2; AltName: Full=BTB/POZ domain-containing protein RPT2;	-6.52812	2.74952e-06	0.000105516	down	NPS233-1_vs_NPS233-2
Glyma.08G080700	RecName: Full=Berberine bridge enzyme-like 13 {ECO:0000303|PubMed:26037923}; Short=AtBBE-like 13 {ECO:0000303|PubMed:26037923}; EC=1.1.1.194 {ECO:0000269|PubMed:26037923}; EC=1.1.1.195 {ECO:0000269|PubMed:26037923}; Flags: Precursor;	-6.5198	1.79905e-05	0.000506174	down	NPS233-1_vs_NPS233-2
Glyma.15G033600	RecName: Full=Zinc finger protein WIP2; AltName: Full=Protein NO TRANSMITTING TRACT; AltName: Full=WIP-domain protein 2 {ECO:0000303|PubMed:11782451}; Short=AtWIP2 {ECO:0000303|PubMed:11782451};	-6.5091	2.88422e-06	0.000109437	down	NPS233-1_vs_NPS233-2
Glyma.08G307200	RecName: Full=GDSL esterase/lipase At2g42990; EC=3.1.1.-; AltName: Full=Extracellular lipase At2g42990; Flags: Precursor;	-6.50832	1.45109e-06	6.07677e-05	down	NPS233-1_vs_NPS233-2
Glyma.03G264300	RecName: Full=Linoleate 13S-lipoxygenase 3-1, chloroplastic; EC=1.13.11.12; Flags: Precursor;	-6.49013	2.57952e-06	0.000100102	down	NPS233-1_vs_NPS233-2
Glyma.19G050000	RecName: Full=GDSL esterase/lipase At5g33370; EC=3.1.1.-; AltName: Full=Extracellular lipase At5g33370; Flags: Precursor;	-6.45036	7.24641e-07	3.41683e-05	down	NPS233-1_vs_NPS233-2
Glyma.13G151800	RecName: Full=Fructose-bisphosphate aldolase 6, cytosolic {ECO:0000305}; Short=AtFBA6 {ECO:0000303|PubMed:22561114}; EC=4.1.2.13 {ECO:0000269|PubMed:21782461}; AltName: Full=Cytosolic aldolase 2 {ECO:0000303|PubMed:21782461}; Short=cAld2 {ECO:0000303|PubMed:21782461};	-6.44582	1.38173e-05	0.000406259	down	NPS233-1_vs_NPS233-2
Glyma.09G274000	RecName: Full=Probable WRKY transcription factor 70; AltName: Full=WRKY DNA-binding protein 70;	-6.44428	7.85006e-07	3.63996e-05	down	NPS233-1_vs_NPS233-2
novel.45	--	-6.43691	5.55094e-06	0.000189957	down	NPS233-1_vs_NPS233-2
Glyma.03G155400	--	-6.43001	0.000462693	0.00723526	down	NPS233-1_vs_NPS233-2
Glyma.20G140400	RecName: Full=Cysteine-rich receptor-like protein kinase 10; Short=Cysteine-rich RLK10; EC=2.7.11.-; AltName: Full=Receptor-like protein kinase 4; Flags: Precursor;	-6.39786	4.27524e-06	0.000152419	down	NPS233-1_vs_NPS233-2
Glyma.12G170500	RecName: Full=Potassium channel AKT2/3;	-6.39502	7.14984e-06	0.000235388	down	NPS233-1_vs_NPS233-2
Glyma.14G074500	RecName: Full=Protein RADIALIS-like 1; Short=AtRL1; Short=Protein RAD-like 1; AltName: Full=Protein RADIALIS-LIKE SANT/MYB 2; Short=Protein RSM2;	-6.38245	5.11246e-06	0.000177325	down	NPS233-1_vs_NPS233-2
Glyma.03G127800	RecName: Full=Sigma factor binding protein 2, chloroplastic; Short=Sigma factor binding protein II; AltName: Full=VQ motif-containing protein 16 {ECO:0000303|PubMed:22535423}; Short=AtVQ16 {ECO:0000303|PubMed:22535423}; Flags: Precursor;	-6.36343	6.09653e-05	0.00139033	down	NPS233-1_vs_NPS233-2
Glyma.13G278600	RecName: Full=Beta-glucosidase 18; Short=Os4bglu18; EC=3.2.1.21; Flags: Precursor;	-6.349	1.08704e-05	0.000335516	down	NPS233-1_vs_NPS233-2
Glyma.11G233400	RecName: Full=Laccase-5; EC=1.10.3.2; AltName: Full=Benzenediol:oxygen oxidoreductase 5; AltName: Full=Diphenol oxidase 5; AltName: Full=Urishiol oxidase 5; Flags: Precursor;	-6.33952	2.34215e-05	0.000632319	down	NPS233-1_vs_NPS233-2
Glyma.03G029900	RecName: Full=Cytochrome P450 71B36; EC=1.14.-.-;	-6.33877	7.34407e-14	1.55471e-11	down	NPS233-1_vs_NPS233-2
Glyma.02G014900	--	-6.30744	2.11351e-05	0.000578221	down	NPS233-1_vs_NPS233-2
Glyma.10G259200	--	-6.3002	2.43796e-05	0.000655303	down	NPS233-1_vs_NPS233-2
Glyma.11G080300	RecName: Full=Peroxidase 64; Short=Atperox P64; EC=1.11.1.7; AltName: Full=ATP17a; AltName: Full=PRXR4; Flags: Precursor;	-6.28609	3.36704e-07	1.75177e-05	down	NPS233-1_vs_NPS233-2
Glyma.18G061300	RecName: Full=Gibberellin 2-beta-dioxygenase 8; EC=1.14.11.13; AltName: Full=GA 2-oxidase 8; AltName: Full=Gibberellin 2-beta-hydroxylase 8; AltName: Full=Gibberellin 2-oxidase 8;	-6.27383	4.36506e-05	0.00105504	down	NPS233-1_vs_NPS233-2
Glyma.05G036900	--	-6.26974	9.11357e-06	0.000289596	down	NPS233-1_vs_NPS233-2
Glyma.18G280700	RecName: Full=Transcription factor TCP1;	-6.26713	1.46896e-05	0.000428216	down	NPS233-1_vs_NPS233-2
Glyma.10G031900	RecName: Full=Auxin-induced protein AUX28;	-6.26094	0.000670007	0.00969205	down	NPS233-1_vs_NPS233-2
Glyma.18G269600	RecName: Full=Isoflavone 7-O-methyltransferase; EC=2.1.1.150; AltName: Full=Daidzein 7-O-methyltransferase;	-6.25759	2.55415e-05	0.000684136	down	NPS233-1_vs_NPS233-2
Glyma.01G154400	RecName: Full=ABC transporter G family member 14; Short=ABC transporter ABCG.14; Short=AtABCG14; AltName: Full=White-brown complex homolog protein 14; Short=AtWBC14;	-6.25477	4.57576e-05	0.00109647	down	NPS233-1_vs_NPS233-2
novel.1080	--	-6.25433	1.23893e-05	0.000372419	down	NPS233-1_vs_NPS233-2
Glyma.04G107600	RecName: Full=Probable glutathione S-transferase; EC=2.5.1.18; AltName: Full=G2-4; AltName: Full=Heat shock protein 26A;	-6.25335	6.61512e-05	0.00148326	down	NPS233-1_vs_NPS233-2
Glyma.08G249800	RecName: Full=COBRA-like protein 4; Flags: Precursor;	-6.25043	0.000231623	0.0041193	down	NPS233-1_vs_NPS233-2
Glyma.16G170100	--	-6.24858	2.46546e-06	9.6512e-05	down	NPS233-1_vs_NPS233-2
Glyma.18G249800	RecName: Full=Subtilisin-like protease Glyma18g48580; EC=3.4.21.-; Contains: RecName: Full=Subtilase peptide GmSubPep; AltName: Full=Glycine max subtilase peptide; Short=GmSubPep; Flags: Precursor;	-6.24808	2.05154e-27	2.86246e-24	down	NPS233-1_vs_NPS233-2
Glyma.09G014100	RecName: Full=Nuclear transcription factor Y subunit B-3; Short=AtNF-YB-3; AltName: Full=Transcriptional activator HAP3C;	-6.24248	0.000173555	0.00325638	down	NPS233-1_vs_NPS233-2
Glyma.04G014000	RecName: Full=Polyol transporter 5; AltName: Full=Protein POLYOL TRANSPORTER 5; Short=AtPLT5; AltName: Full=Sugar-proton symporter PLT5;	-6.24068	4.47473e-05	0.00107477	down	NPS233-1_vs_NPS233-2
Glyma.12G057400	RecName: Full=Aldehyde dehydrogenase family 3 member F1; EC=1.2.1.3;	-6.2406	2.83861e-05	0.000746131	down	NPS233-1_vs_NPS233-2
Glyma.06G272900	RecName: Full=KDEL-tailed cysteine endopeptidase CEP1; EC=3.4.22.-; AltName: Full=Cysteine proteinase CP56; Short=AtCP56; Flags: Precursor;	-6.23313	0.000270447	0.00467961	down	NPS233-1_vs_NPS233-2
Glyma.14G038300	RecName: Full=Multicystatin; Short=MC;	-6.22826	3.39963e-06	0.000125578	down	NPS233-1_vs_NPS233-2
Glyma.08G022000	--	-6.22615	4.27631e-05	0.00103685	down	NPS233-1_vs_NPS233-2
Glyma.13G322300	--	-6.22571	5.90414e-06	0.000200798	down	NPS233-1_vs_NPS233-2
Glyma.16G019400	RecName: Full=NAC domain-containing protein 43; Short=ANAC043; AltName: Full=Protein EMBRYO DEFECTIVE 2301; AltName: Full=Protein NAC SECONDARY WALL THICKENING PROMOTING FACTOR 1;	-6.21281	3.22809e-05	0.000827814	down	NPS233-1_vs_NPS233-2
Glyma.06G192100	RecName: Full=Organic cation/carnitine transporter 3; Short=AtOCT3;	-6.20438	2.37574e-05	0.000639701	down	NPS233-1_vs_NPS233-2
Glyma.08G079200	RecName: Full=Polygalacturonase inhibitor 2; AltName: Full=Polygalacturonase-inhibiting protein 2; Short=PGIP-2; Flags: Precursor;	-6.18566	6.24658e-06	0.000210941	down	NPS233-1_vs_NPS233-2
Glyma.03G068200	RecName: Full=Trypsin inhibitor; Contains: RecName: Full=Trypsin inhibitor chain A; Contains: RecName: Full=Trypsin inhibitor chain B; Flags: Precursor;	-6.1762	0.000195892	0.00359421	down	NPS233-1_vs_NPS233-2
Glyma.16G141000	RecName: Full=Probable polyol transporter 3;	-6.15549	2.77812e-05	0.000734515	down	NPS233-1_vs_NPS233-2
Glyma.08G116100	RecName: Full=Protein LIGHT-DEPENDENT SHORT HYPOCOTYLS 10; AltName: Full=Protein ORGAN BOUNDARY 10;	-6.13952	8.74392e-06	0.000279006	down	NPS233-1_vs_NPS233-2
Glyma.06G013300	--	-6.13249	0.000222989	0.00399584	down	NPS233-1_vs_NPS233-2
Glyma.04G198000	RecName: Full=Omega-hydroxypalmitate O-feruloyl transferase; EC=2.3.1.188; AltName: Full=Omega-hydroxyacid hydroxycinnamoyltransferase; AltName: Full=Protein ALIPHATIC SUBERIN FERULOYL TRANSFERASE;	-6.13185	1.78169e-05	0.00050175	down	NPS233-1_vs_NPS233-2
Glyma.06G016800	RecName: Full=WUSCHEL-related homeobox 8; AltName: Full=OsWOX8; AltName: Full=Protein WOX13;	-6.12705	2.0204e-05	0.000557718	down	NPS233-1_vs_NPS233-2
Glyma.16G105100	RecName: Full=Mechanosensitive ion channel protein 10; AltName: Full=Mechanosensitive channel of small conductance-like 10; AltName: Full=MscS-Like protein 10; Short=AtMSL10;	-6.11115	5.25406e-06	0.000181212	down	NPS233-1_vs_NPS233-2
Glyma.06G177500	--	-6.11041	0.000458218	0.00717992	down	NPS233-1_vs_NPS233-2
Glyma.05G204600	RecName: Full=Protein P21;	-6.10673	5.2908e-18	2.10918e-15	down	NPS233-1_vs_NPS233-2
Glyma.03G028000	RecName: Full=Arginase; EC=3.5.3.1 {ECO:0000250|UniProtKB:P05089};	-6.10226	3.93765e-05	0.000971629	down	NPS233-1_vs_NPS233-2
Glyma.09G131900	RecName: Full=Glutaminyl-peptide cyclotransferase; EC=2.3.2.5; AltName: Full=Glutaminyl cyclase;	-6.09415	5.90696e-06	0.000200798	down	NPS233-1_vs_NPS233-2
Glyma.05G188000	--	-6.0898	4.45011e-06	0.000157374	down	NPS233-1_vs_NPS233-2
Glyma.10G154900	--	-6.08586	3.83141e-05	0.000951528	down	NPS233-1_vs_NPS233-2
Glyma.13G335500	RecName: Full=Cyclin-dependent protein kinase inhibitor SMR3 {ECO:0000303|PubMed:24399300, ECO:0000303|PubMed:26546445}; AltName: Full=Protein SIAMESE-RELATED 3 {ECO:0000303|PubMed:24399300, ECO:0000303|PubMed:26546445};	-6.0793	3.04605e-05	0.000791044	down	NPS233-1_vs_NPS233-2
Glyma.14G062300	RecName: Full=Laccase-4; EC=1.10.3.2; AltName: Full=Benzenediol:oxygen oxidoreductase 4; AltName: Full=Diphenol oxidase 4; AltName: Full=Protein IRREGULAR XYLEM 12; AltName: Full=Urishiol oxidase 4; Flags: Precursor;	-6.07646	0.000648974	0.00944119	down	NPS233-1_vs_NPS233-2
novel.1153	RecName: Full=Serine carboxypeptidase-like 50; EC=3.4.16.-; Flags: Precursor;	-6.0679	3.71756e-05	0.000927759	down	NPS233-1_vs_NPS233-2
Glyma.10G185500	RecName: Full=Protein SIEVE ELEMENT OCCLUSION B {ECO:0000303|PubMed:20932300}; Short=AtSEOb {ECO:0000303|PubMed:20932300}; AltName: Full=Protein SIEVE ELEMENT OCCLUSION-RELATED 1 {ECO:0000303|PubMed:22470058}; Short=AtSEOR1 {ECO:0000303|PubMed:22470058};	-6.06742	0.000169392	0.00318998	down	NPS233-1_vs_NPS233-2
Glyma.13G169900	RecName: Full=Homeobox-leucine zipper protein HAT5; AltName: Full=HD-ZIP protein ATHB-1; AltName: Full=Homeodomain transcription factor ATHB-1; AltName: Full=Homeodomain-leucine zipper protein HAT5; Short=HD-ZIP protein 5;	-6.0645	5.50362e-05	0.00128373	down	NPS233-1_vs_NPS233-2
Glyma.10G086800	RecName: Full=ABC transporter G family member 22; Short=ABC transporter ABCG.22; Short=AtABCG22; AltName: Full=White-brown complex homolog protein 23; Short=AtWBC23;	-6.06084	3.88137e-05	0.000960828	down	NPS233-1_vs_NPS233-2
Glyma.05G125000	RecName: Full=Berberine bridge enzyme-like 28 {ECO:0000303|PubMed:26037923}; Short=AtBBE-like 28 {ECO:0000303|PubMed:26037923}; EC=1.1.1.- {ECO:0000250|UniProtKB:O64743}; Flags: Precursor;	-6.05854	5.87339e-05	0.00135048	down	NPS233-1_vs_NPS233-2
Glyma.17G259600	RecName: Full=GDSL esterase/lipase EXL1; EC=3.1.1.-; AltName: Full=Family II extracellular lipase 1; Short=Family II lipase EXL1; Flags: Precursor;	-6.05715	4.0589e-05	0.000997533	down	NPS233-1_vs_NPS233-2
novel.527	--	-6.05667	6.02472e-05	0.00137908	down	NPS233-1_vs_NPS233-2
Glyma.04G040900	RecName: Full=WUSCHEL-related homeobox 4;	-6.05633	8.954e-06	0.000285412	down	NPS233-1_vs_NPS233-2
Glyma.18G043200	RecName: Full=Protein TPX2; Short=AtTPX2; AltName: Full=Targeting protein for XKLP2;	-6.053	8.5901e-05	0.00183367	down	NPS233-1_vs_NPS233-2
Glyma.03G244400	RecName: Full=Benzyl alcohol O-benzoyltransferase; EC=2.3.1.196; AltName: Full=Benzoyl coenzyme A:benzyl alcohol benzoyl transferase;	-6.04914	0.000887108	0.0120596	down	NPS233-1_vs_NPS233-2
Glyma.04G027000	RecName: Full=B-box zinc finger protein 21 {ECO:0000303|PubMed:19920209}; Short=AtBBX21; AltName: Full=Protein LONG HYPOCOTYL UNDER SHADE {ECO:0000303|PubMed:21070414}; AltName: Full=Protein SALT TOLERANCE HOMOLOG 2;	-6.04729	3.59526e-05	0.000903111	down	NPS233-1_vs_NPS233-2
Glyma.15G101800	RecName: Full=Beta-amyrin synthase; EC=5.4.99.39;	-6.04402	7.90526e-05	0.00170168	down	NPS233-1_vs_NPS233-2
Glyma.12G075100	RecName: Full=3-ketoacyl-CoA synthase 12 {ECO:0000303|PubMed:18465198}; Short=KCS-12 {ECO:0000303|PubMed:18465198}; EC=2.3.1.199 {ECO:0000305}; AltName: Full=Very long-chain fatty acid condensing enzyme 12 {ECO:0000303|PubMed:18465198}; Short=VLCFA condensing enzyme 12 {ECO:0000303|PubMed:18465198}; Flags: Precursor;	-6.03604	6.186e-05	0.00140552	down	NPS233-1_vs_NPS233-2
Glyma.11G061100	--	-6.02242	0.00135769	0.0170265	down	NPS233-1_vs_NPS233-2
novel.637	--	-6.01767	5.11007e-05	0.0012029	down	NPS233-1_vs_NPS233-2
Glyma.16G177800	RecName: Full=Uncharacterized protein PAM68-like;	-6.01636	7.78376e-10	8.0178e-08	down	NPS233-1_vs_NPS233-2
Glyma.15G038800	--	-6.01523	0.000209568	0.00379522	down	NPS233-1_vs_NPS233-2
Glyma.18G255300	RecName: Full=Thioredoxin H2; Short=AtTrxh2; AltName: Full=Thioredoxin 2; Short=AtTRX2;	-6.01451	0.00032412	0.00544863	down	NPS233-1_vs_NPS233-2
Glyma.04G137100	--	-6.01099	1.34383e-07	7.78068e-06	down	NPS233-1_vs_NPS233-2
Glyma.05G044000	RecName: Full=Probable pectate lyase 22; EC=4.2.2.2; Flags: Precursor;	-6.01072	1.61524e-05	0.000465868	down	NPS233-1_vs_NPS233-2
Glyma.U009200	RecName: Full=BEL1-like homeodomain protein 1; Short=BEL1-like protein 1; AltName: Full=Protein EMBRYO SAC DEVELOPMENT ARREST 29;	-6.00014	5.57326e-05	0.00129505	down	NPS233-1_vs_NPS233-2
Glyma.11G037200	RecName: Full=Taxadien-5-alpha-ol O-acetyltransferase; EC=2.3.1.162; AltName: Full=Taxa-4(20),11(12)-dien-5alpha-ol-O-acetyltransferase; Short=Taxadienol acetyltransferase;	-5.98475	8.68028e-06	0.000277552	down	NPS233-1_vs_NPS233-2
Glyma.13G098200	--	-5.97996	1.62886e-05	0.000468161	down	NPS233-1_vs_NPS233-2
Glyma.05G152500	RecName: Full=Protein ECERIFERUM 26; AltName: Full=CER2-like protein 1; Short=CER2-like1;	-5.97322	4.26476e-05	0.00103569	down	NPS233-1_vs_NPS233-2
Glyma.11G213500	RecName: Full=Protein TPX2; Short=AtTPX2; AltName: Full=Targeting protein for XKLP2;	-5.96379	0.00054906	0.00825768	down	NPS233-1_vs_NPS233-2
Glyma.17G228000	RecName: Full=Protein indeterminate-domain 2 {ECO:0000303|PubMed:16784536};	-5.96333	1.10418e-05	0.000338938	down	NPS233-1_vs_NPS233-2
Glyma.11G207000	RecName: Full=Cysteine-rich receptor-like protein kinase 2; Short=Cysteine-rich RLK2; EC=2.7.11.-; Flags: Precursor;	-5.95082	0.0015662	0.0191462	down	NPS233-1_vs_NPS233-2
novel.1018	RecName: Full=Endoglucanase; EC=3.2.1.4; AltName: Full=Abscission cellulase; AltName: Full=Endo-1,4-beta-glucanase; Flags: Precursor;	-5.93822	9.79051e-05	0.00203473	down	NPS233-1_vs_NPS233-2
Glyma.03G121700	--	-5.93572	0.000105751	0.00214833	down	NPS233-1_vs_NPS233-2
Glyma.13G307000	RecName: Full=Peroxidase 3; Short=Atperox P3; EC=1.11.1.7; AltName: Full=ATPRC; AltName: Full=RCI3A; AltName: Full=Rare cold-inducible protein; Flags: Precursor;	-5.93073	3.34264e-06	0.00012377	down	NPS233-1_vs_NPS233-2
Glyma.02G187200	RecName: Full=Probable glutathione S-transferase; EC=2.5.1.18; AltName: Full=G2-4; AltName: Full=Heat shock protein 26A;	-5.93027	5.06115e-05	0.0011935	down	NPS233-1_vs_NPS233-2
Glyma.15G149800	RecName: Full=Bidirectional sugar transporter SWEET17 {ECO:0000303|PubMed:21107422}; Short=AtSWEET17 {ECO:0000303|PubMed:21107422}; AltName: Full=Protein SUGARS WILL EVENTUALLY BE EXPORTED TRANSPORTERS 17 {ECO:0000303|PubMed:21107422};	-5.92743	1.02646e-05	0.000320531	down	NPS233-1_vs_NPS233-2
Glyma.13G094200	RecName: Full=Pathogenesis-related protein PR-1; Flags: Precursor;	-5.92658	1.98653e-08	1.46936e-06	down	NPS233-1_vs_NPS233-2
Glyma.12G155800	RecName: Full=Beta-glucuronosyltransferase GlcAT14A {ECO:0000305}; EC=2.4.1.- {ECO:0000305}; AltName: Full=GT14 family glucuronic acid transferase 1 {ECO:0000305}; Short=AtGlcAT14A {ECO:0000303|PubMed:24128328};	-5.92553	9.70575e-05	0.00202122	down	NPS233-1_vs_NPS233-2
Glyma.03G244300	RecName: Full=Benzyl alcohol O-benzoyltransferase; EC=2.3.1.196; AltName: Full=Benzoyl coenzyme A:benzyl alcohol benzoyl transferase;	-5.92253	0.000179651	0.00334433	down	NPS233-1_vs_NPS233-2
Glyma.14G185800	RecName: Full=Probable WRKY transcription factor 70; AltName: Full=WRKY DNA-binding protein 70;	-5.91921	7.77016e-05	0.00168085	down	NPS233-1_vs_NPS233-2
Glyma.15G200600	RecName: Full=Probable flavin-containing monooxygenase 1; EC=1.14.13.-;	-5.91894	0.000133986	0.00262298	down	NPS233-1_vs_NPS233-2
Glyma.19G015300	RecName: Full=Cytochrome P450 82A4; EC=1.14.-.-; AltName: Full=Cytochrome P450 CP9;	-5.91878	9.67846e-05	0.00201827	down	NPS233-1_vs_NPS233-2
Glyma.11G049800	RecName: Full=BTB/POZ domain-containing protein SR1IP1 {ECO:0000305}; AltName: Full=Protein ATSR1-INTERACTION PROTEIN 1 {ECO:0000303|PubMed:24528504};	-5.91866	0.000153496	0.00291927	down	NPS233-1_vs_NPS233-2
Glyma.05G139800	RecName: Full=NAD(P)H-quinone oxidoreductase subunit L, chloroplastic; EC=1.6.5.- {ECO:0000305}; AltName: Full=NAD(P)H dehydrogenase subunit L {ECO:0000303|PubMed:21785130}; Short=NDH subunit L {ECO:0000305}; Short=NDH-L {ECO:0000305}; AltName: Full=NADH-plastoquinone oxidoreductase subunit L {ECO:0000305}; AltName: Full=Protein CHLORORESPIRATORY REDUCTION 23 {ECO:0000303|PubMed:18388109}; Flags:…	-5.91686	3.13544e-05	0.000807427	down	NPS233-1_vs_NPS233-2
Glyma.14G191300	RecName: Full=Protein NRT1/ PTR FAMILY 8.1; Short=AtNPF8.1; AltName: Full=Peptide transporter PTR1;	-5.91429	7.34391e-05	0.00160676	down	NPS233-1_vs_NPS233-2
Glyma.13G233600	RecName: Full=GDSL esterase/lipase At5g45950; EC=3.1.1.-; AltName: Full=Extracellular lipase At5g45950; Flags: Precursor;	-5.90784	5.77569e-05	0.00133301	down	NPS233-1_vs_NPS233-2
Glyma.06G034300	--	-5.88437	1.32609e-05	0.000394053	down	NPS233-1_vs_NPS233-2
Glyma.08G299000	--	-5.8771	0.000110433	0.00222722	down	NPS233-1_vs_NPS233-2
Glyma.14G186000	RecName: Full=Probable WRKY transcription factor 70; AltName: Full=WRKY DNA-binding protein 70;	-5.87693	1.33543e-05	0.000396421	down	NPS233-1_vs_NPS233-2
Glyma.06G088300	RecName: Full=Amino acid permease 8; AltName: Full=Amino acid transporter AAP8;	-5.87596	1.72068e-05	0.000487251	down	NPS233-1_vs_NPS233-2
Glyma.11G206300	RecName: Full=Cysteine-rich receptor-like protein kinase 2; Short=Cysteine-rich RLK2; EC=2.7.11.-; Flags: Precursor;	-5.87428	5.94604e-05	0.00136412	down	NPS233-1_vs_NPS233-2
Glyma.13G346700	RecName: Full=Endochitinase PR4; EC=3.2.1.14; Flags: Precursor;	-5.86914	7.44484e-05	0.00162421	down	NPS233-1_vs_NPS233-2
Glyma.14G208900	RecName: Full=CASP-like protein 2A1; Short=GmCASPL2A1;	-5.86847	6.63931e-05	0.00148611	down	NPS233-1_vs_NPS233-2
Glyma.04G055400	RecName: Full=NAD(P)H-quinone oxidoreductase subunit U, chloroplastic {ECO:0000305}; EC=1.6.5.- {ECO:0000305}; AltName: Full=NAD(P)H dehydrogenase subunit U {ECO:0000303|PubMed:21785130}; Short=NDH subunit U {ECO:0000305}; AltName: Full=NADH-plastoquinone oxidoreductase subunit U {ECO:0000305}; AltName: Full=Protein CHLORORESPIRATORY REDUCTION L {ECO:0000303|PubMed:21505067}; Flags: Precursor;	-5.85712	2.22792e-05	0.00060628	down	NPS233-1_vs_NPS233-2
Glyma.10G185600	RecName: Full=Protein SIEVE ELEMENT OCCLUSION B {ECO:0000303|PubMed:20932300}; Short=AtSEOb {ECO:0000303|PubMed:20932300}; AltName: Full=Protein SIEVE ELEMENT OCCLUSION-RELATED 1 {ECO:0000303|PubMed:22470058}; Short=AtSEOR1 {ECO:0000303|PubMed:22470058};	-5.85153	9.09276e-05	0.00192226	down	NPS233-1_vs_NPS233-2
Glyma.06G175200	RecName: Full=Protein SIEVE ELEMENT OCCLUSION B {ECO:0000303|PubMed:20932300}; Short=AtSEOb {ECO:0000303|PubMed:20932300}; AltName: Full=Protein SIEVE ELEMENT OCCLUSION-RELATED 1 {ECO:0000303|PubMed:22470058}; Short=AtSEOR1 {ECO:0000303|PubMed:22470058};	-5.84856	0.000103216	0.00211449	down	NPS233-1_vs_NPS233-2
Glyma.09G135700	RecName: Full=Short-chain dehydrogenase TIC 32, chloroplastic; EC=1.1.1.-; AltName: Full=Translocon at the inner envelope membrane of chloroplasts 32; Short=PsTIC32;	-5.84593	6.78917e-05	0.00150796	down	NPS233-1_vs_NPS233-2
novel.719	--	-5.84593	6.78917e-05	0.00150796	down	NPS233-1_vs_NPS233-2
Glyma.11G231300	RecName: Full=Transcription factor bHLH51; AltName: Full=Basic helix-loop-helix protein 51; Short=AtbHLH51; Short=bHLH 51; AltName: Full=Transcription factor EN 57; AltName: Full=bHLH transcription factor bHLH051;	-5.84577	1.31829e-05	0.000392877	down	NPS233-1_vs_NPS233-2
Glyma.02G142400	RecName: Full=Auxin-responsive protein IAA30; AltName: Full=Indoleacetic acid-induced protein 30;	-5.83909	0.00015566	0.00295678	down	NPS233-1_vs_NPS233-2
Glyma.14G018800	--	-5.83858	1.33664e-05	0.000396421	down	NPS233-1_vs_NPS233-2
Glyma.13G370200	RecName: Full=ACT domain-containing protein ACR11 {ECO:0000305}; AltName: Full=Protein ACT DOMAIN REPEATS 11 {ECO:0000303|PubMed:21861936}; Flags: Precursor;	-5.83281	9.95193e-05	0.00205713	down	NPS233-1_vs_NPS233-2
Glyma.08G328400	RecName: Full=Purine permease 21 {ECO:0000303|PubMed:27701112}; Short=AtPUP21 {ECO:0000303|PubMed:27701112};	-5.82806	0.00068767	0.0099009	down	NPS233-1_vs_NPS233-2
Glyma.19G025100	RecName: Full=UDP-glycosyltransferase 74G1 {ECO:0000303|PubMed:15610349}; EC=2.4.1.- {ECO:0000305};	-5.82388	1.98924e-05	0.000550601	down	NPS233-1_vs_NPS233-2
Glyma.19G201300	--	-5.81515	1.19162e-05	0.000360729	down	NPS233-1_vs_NPS233-2
Glyma.11G124500	RecName: Full=Endochitinase PR4; EC=3.2.1.14; Flags: Precursor;	-5.81414	0.000106174	0.0021516	down	NPS233-1_vs_NPS233-2
Glyma.12G128100	RecName: Full=Protein LIGHT-DEPENDENT SHORT HYPOCOTYLS 10; AltName: Full=Protein ORGAN BOUNDARY 10;	-5.79662	9.6279e-05	0.00201046	down	NPS233-1_vs_NPS233-2
novel.676	--	-5.79537	0.000400375	0.00645479	down	NPS233-1_vs_NPS233-2
Glyma.19G016600	RecName: Full=ABC transporter B family member 15; Short=ABC transporter ABCB.15; Short=AtABCB15; AltName: Full=Multidrug resistance protein 13; AltName: Full=P-glycoprotein 15;	-5.78685	0.000421385	0.0067144	down	NPS233-1_vs_NPS233-2
Glyma.18G103500	RecName: Full=Spermidine hydroxycinnamoyl transferase; EC=2.3.1.-; AltName: Full=BAHD-like hydroxycinnamoyl transferase;	-5.78561	0.000708049	0.0101325	down	NPS233-1_vs_NPS233-2
Glyma.08G366900	RecName: Full=Zinc finger protein 6 {ECO:0000305};	-5.77636	0.000114704	0.00229828	down	NPS233-1_vs_NPS233-2
Glyma.17G019200	RecName: Full=Membrane protein PM19L {ECO:0000305}; AltName: Full=PM19-like protein 1 {ECO:0000303|PubMed:26505346}; Short=OsPM19L1 {ECO:0000303|PubMed:26505346};	-5.77636	0.000114704	0.00229828	down	NPS233-1_vs_NPS233-2
Glyma.11G248900	RecName: Full=OTU domain-containing protein At3g57810;	-5.77533	0.000149359	0.00284969	down	NPS233-1_vs_NPS233-2
Glyma.09G159300	--	-5.77285	0.000465991	0.00728313	down	NPS233-1_vs_NPS233-2
Glyma.02G121800	--	-5.76196	0.000437042	0.00690805	down	NPS233-1_vs_NPS233-2
Glyma.20G057500	RecName: Full=Linamarin synthase 2 {ECO:0000305}; EC=2.4.1.63 {ECO:0000269|PubMed:21736650}; AltName: Full=Cyanohydrin UDP-glucosyltransferase UGT85K5 {ECO:0000303|PubMed:21736650};	-5.75195	0.00283504	0.0305778	down	NPS233-1_vs_NPS233-2
Glyma.15G117900	--	-5.74357	0.000597102	0.00885404	down	NPS233-1_vs_NPS233-2
Glyma.13G333100	RecName: Full=Aquaporin TIP1-3; AltName: Full=Gamma-tonoplast intrinsic protein 3; Short=Gamma-TIP3; AltName: Full=Tonoplast intrinsic protein 1-3; Short=AtTIP1;3;	-5.74205	1.03016e-06	4.54992e-05	down	NPS233-1_vs_NPS233-2
Glyma.04G034100	--	-5.7412	0.000390446	0.00632127	down	NPS233-1_vs_NPS233-2
Glyma.18G059700	RecName: Full=Ethylene-overproduction protein 1; AltName: Full=Protein ETHYLENE OVERPRODUCER 1; Short=Protein ETO1;	-5.7196	0.000214771	0.0038621	down	NPS233-1_vs_NPS233-2
Glyma.07G212800	RecName: Full=Ferredoxin--nitrite reductase, chloroplastic; EC=1.7.7.1; Flags: Precursor;	-5.71711	4.22499e-05	0.00102684	down	NPS233-1_vs_NPS233-2
Glyma.13G210700	--	-5.71416	0.000258891	0.0045153	down	NPS233-1_vs_NPS233-2
Glyma.15G089000	RecName: Full=GDSL esterase/lipase At1g29670; EC=3.1.1.-; AltName: Full=Extracellular lipase At1g29670; Flags: Precursor;	-5.70559	5.81551e-12	8.88124e-10	down	NPS233-1_vs_NPS233-2
Glyma.08G137300	--	-5.69854	0.000735178	0.0104332	down	NPS233-1_vs_NPS233-2
Glyma.02G121400	RecName: Full=Protein BIG GRAIN 1-like E {ECO:0000305};	-5.69852	0.000316749	0.00535994	down	NPS233-1_vs_NPS233-2
Glyma.11G239700	--	-5.69275	2.56725e-09	2.31098e-07	down	NPS233-1_vs_NPS233-2
Glyma.19G261600	--	-5.68403	2.37965e-10	2.66591e-08	down	NPS233-1_vs_NPS233-2
Glyma.08G085000	RecName: Full=Cytochrome b561 domain-containing protein At4g18260; AltName: Full=Protein b561A.tha13; Flags: Precursor;	-5.68345	0.000321141	0.00541338	down	NPS233-1_vs_NPS233-2
Glyma.20G018000	--	-5.67891	0.00014441	0.00278618	down	NPS233-1_vs_NPS233-2
Glyma.07G078100	RecName: Full=Disease resistance protein RPS2; AltName: Full=Resistance to Pseudomonas syringae protein 2;	-5.67458	0.000384039	0.00623728	down	NPS233-1_vs_NPS233-2
Glyma.12G067000	RecName: Full=Licodione synthase; EC=1.14.13.87; AltName: Full=(2S)-flavanone 2-hydroxylase; AltName: Full=CYP GE-5; AltName: Full=Cytochrome P450 93B1; AltName: Full=Flavone synthase II;	-5.65916	0.000213746	0.00385241	down	NPS233-1_vs_NPS233-2
Glyma.06G275900	RecName: Full=Peroxidase 4 {ECO:0000250|UniProtKB:Q42578}; EC=1.11.1.7; Flags: Precursor;	-5.6579	0.000536567	0.00811744	down	NPS233-1_vs_NPS233-2
Glyma.15G258100	RecName: Full=LOB domain-containing protein 4; AltName: Full=ASYMMETRIC LEAVES 2-like protein 6; Short=AS2-like protein 6;	-5.65358	0.000301642	0.00514399	down	NPS233-1_vs_NPS233-2
Glyma.10G185700	RecName: Full=Protein SIEVE ELEMENT OCCLUSION B {ECO:0000303|PubMed:20932300}; Short=AtSEOb {ECO:0000303|PubMed:20932300}; AltName: Full=Protein SIEVE ELEMENT OCCLUSION-RELATED 1 {ECO:0000303|PubMed:22470058}; Short=AtSEOR1 {ECO:0000303|PubMed:22470058};	-5.65336	6.71504e-05	0.00149691	down	NPS233-1_vs_NPS233-2
Glyma.08G026800	RecName: Full=Lon protease homolog 2, peroxisomal {ECO:0000255|HAMAP-Rule:MF_03121}; EC=3.4.21.53 {ECO:0000255|HAMAP-Rule:MF_03121};	-5.65083	0.000365547	0.00600825	down	NPS233-1_vs_NPS233-2
Glyma.18G025800	RecName: Full=Transcription factor bHLH51; AltName: Full=Basic helix-loop-helix protein 51; Short=AtbHLH51; Short=bHLH 51; AltName: Full=Transcription factor EN 57; AltName: Full=bHLH transcription factor bHLH051;	-5.64909	0.000270677	0.00468097	down	NPS233-1_vs_NPS233-2
Glyma.05G213400	RecName: Full=Disease resistance response protein 206; AltName: Full=Dirigent protein PI206; Flags: Precursor;	-5.64859	0.00130802	0.0165435	down	NPS233-1_vs_NPS233-2
Glyma.10G281400	RecName: Full=Glycerate dehydrogenase HPR, peroxisomal; Short=GDH; EC=1.1.1.29; AltName: Full=NADH-dependent hydroxypyruvate reductase 1; Short=AtHPR1; Short=HPR 1;	-5.63183	2.53824e-08	1.81195e-06	down	NPS233-1_vs_NPS233-2
Glyma.11G145100	RecName: Full=Cytokinin riboside 5'-monophosphate phosphoribohydrolase LOG1; EC=3.2.2.n1; AltName: Full=Protein LONELY GUY 1;	-5.63013	2.08592e-06	8.31552e-05	down	NPS233-1_vs_NPS233-2
Glyma.19G222000	RecName: Full=Transcription factor PIF3; AltName: Full=Basic helix-loop-helix protein 8; Short=AtbHLH8; Short=bHLH 8; AltName: Full=Phytochrome-associated protein 3; AltName: Full=Phytochrome-interacting factor 3; AltName: Full=Transcription factor EN 100; AltName: Full=bHLH transcription factor bHLH008;	-5.6257	3.83984e-05	0.000952851	down	NPS233-1_vs_NPS233-2
Glyma.06G039100	RecName: Full=BRI1 kinase inhibitor 1;	-5.62568	3.66891e-05	0.000918465	down	NPS233-1_vs_NPS233-2
Glyma.09G134100	RecName: Full=Protein DETOXIFICATION 34 {ECO:0000303|PubMed:11739388}; Short=AtDTX34 {ECO:0000303|PubMed:11739388}; AltName: Full=Multidrug and toxic compound extrusion protein 34 {ECO:0000305}; Short=MATE protein 34 {ECO:0000305};	-5.62313	4.17724e-06	0.000149795	down	NPS233-1_vs_NPS233-2
Glyma.19G053800	RecName: Full=Pectate lyase; EC=4.2.2.2; AltName: Full=ZePel; Flags: Precursor;	-5.60078	0.000786632	0.0109879	down	NPS233-1_vs_NPS233-2
Glyma.04G245200	RecName: Full=NAD(P)H-quinone oxidoreductase subunit M, chloroplastic {ECO:0000305}; EC=1.6.5.- {ECO:0000305}; AltName: Full=NAD(P)H dehydrogenase subunit M {ECO:0000305}; Short=NDH subunit M {ECO:0000305}; Short=NDH-M {ECO:0000250|UniProtKB:Q2V2S7}; AltName: Full=NADH-plastoquinone oxidoreductase subunit M {ECO:0000305}; Flags: Precursor;	-5.59055	0.000286445	0.00492037	down	NPS233-1_vs_NPS233-2
Glyma.07G141300	RecName: Full=Putative lipid-transfer protein DIR1; AltName: Full=Protein DEFECTIVE IN INDUCED RESISTANCE 1; Flags: Precursor;	-5.5897	0.00115283	0.0148873	down	NPS233-1_vs_NPS233-2
Glyma.09G278000	RecName: Full=Non-specific lipid-transfer protein 3; Short=LTP3; Flags: Precursor;	-5.58759	0.00128134	0.0162798	down	NPS233-1_vs_NPS233-2
Glyma.18G012200	RecName: Full=Probable pectate lyase 5; EC=4.2.2.2; Flags: Precursor;	-5.57738	0.000816316	0.0112923	down	NPS233-1_vs_NPS233-2
novel.1086	--	-5.57659	0.000266906	0.00463401	down	NPS233-1_vs_NPS233-2
Glyma.06G266900	RecName: Full=Probable galacturonosyltransferase 12; EC=2.4.1.-; AltName: Full=Like glycosyl transferase 6; AltName: Full=Protein IRREGULAR XYLEM 8;	-5.56947	0.00131971	0.016657	down	NPS233-1_vs_NPS233-2
Glyma.18G098400	RecName: Full=Acylamino-acid-releasing enzyme {ECO:0000305}; Short=AARE {ECO:0000303|PubMed:12966075}; EC=3.4.19.1 {ECO:0000269|PubMed:12966075}; AltName: Full=Oxidized protein hydrolase {ECO:0000303|PubMed:22398639}; Short=OPH {ECO:0000303|PubMed:22398639};	-5.5661	1.33645e-12	2.3851e-10	down	NPS233-1_vs_NPS233-2
Glyma.11G102300	RecName: Full=Large ribosomal RNA subunit accumulation protein YCED homolog 2, chloroplastic {ECO:0000305}; AltName: Full=Protein DUF177B {ECO:0000303|PubMed:27574185}; Flags: Precursor;	-5.56494	0.00028824	0.00494844	down	NPS233-1_vs_NPS233-2
Glyma.04G035000	RecName: Full=Allene oxide synthase 1, chloroplastic {ECO:0000303|PubMed:12351632}; Short=LeAOS1 {ECO:0000303|PubMed:12351632}; EC=4.2.1.92 {ECO:0000305}; AltName: Full=Cytochrome P450 74A {ECO:0000305}; Flags: Precursor;	-5.56356	0.000248766	0.00438103	down	NPS233-1_vs_NPS233-2
Glyma.08G218800	RecName: Full=Photosynthetic NDH subunit of subcomplex B 1, chloroplastic {ECO:0000303|PubMed:21785130}; Short=Protein PnsB1 {ECO:0000303|PubMed:21785130}; AltName: Full=NAD(P)H DEHYDROGENASE SUBUNIT 48 {ECO:0000303|PubMed:18974055}; AltName: Full=NDH-DEPENDENT CYCLIC ELECTRON FLOW 1 {ECO:0000303|PubMed:18785996}; Flags: Precursor;	-5.56342	0.000158393	0.00300126	down	NPS233-1_vs_NPS233-2
novel.812	--	-5.55644	0.000480965	0.00744513	down	NPS233-1_vs_NPS233-2
Glyma.14G117300	--	-5.55624	0.00100571	0.0133354	down	NPS233-1_vs_NPS233-2
Glyma.09G102100	RecName: Full=Ras-related protein RABH1b; Short=AtRABH1b; AltName: Full=Ras-related protein Rab6A; Short=AtRab6A;	-5.55436	8.33896e-05	0.00178627	down	NPS233-1_vs_NPS233-2
Glyma.12G031300	RecName: Full=Protein NUCLEAR FUSION DEFECTIVE 4 {ECO:0000303|PubMed:16698901};	-5.55398	3.50002e-14	7.67404e-12	down	NPS233-1_vs_NPS233-2
Glyma.02G015800	RecName: Full=Fumarate hydratase 2, chloroplastic; Short=Fumarase 2; EC=4.2.1.2; Flags: Precursor;	-5.55085	3.23517e-06	0.000120372	down	NPS233-1_vs_NPS233-2
Glyma.02G278600	RecName: Full=Dihydropyrimidinase {ECO:0000303|PubMed:12626710}; EC=3.5.2.2 {ECO:0000269|PubMed:19413687}; AltName: Full=Dihydropyrimidine amidohydrolase {ECO:0000303|PubMed:12626710}; AltName: Full=Protein PYRIMIDINE 2 {ECO:0000303|PubMed:12626710};	-5.54821	0.000433221	0.0068554	down	NPS233-1_vs_NPS233-2
Glyma.11G008900	RecName: Full=Uncharacterized protein At3g50808;	-5.54379	0.000681761	0.00982504	down	NPS233-1_vs_NPS233-2
Glyma.13G113700	RecName: Full=Putative pectinesterase 63; Short=PE 63; EC=3.1.1.11; AltName: Full=Pectin methylesterase 63; Short=AtPME63; Flags: Precursor;	-5.53695	0.000387097	0.00627367	down	NPS233-1_vs_NPS233-2
Glyma.15G070900	--	-5.52484	4.32464e-08	2.88585e-06	down	NPS233-1_vs_NPS233-2
Glyma.17G180300	RecName: Full=Probable disease resistance protein At5g66900;	-5.52199	0.000331913	0.00555227	down	NPS233-1_vs_NPS233-2
Glyma.14G087500	RecName: Full=Subtilisin-like protease SBT1.7 {ECO:0000303|PubMed:16193095}; EC=3.4.21.- {ECO:0000305}; AltName: Full=Cucumisin-like serine protease; AltName: Full=Subtilase subfamily 1 member 7 {ECO:0000303|PubMed:16193095}; Short=AtSBT1.7 {ECO:0000303|PubMed:16193095}; AltName: Full=Subtilisin-like serine protease 1 {ECO:0000303|PubMed:12702015}; Short=At-SLP1 {ECO:0000303|PubMed:12702015}; Fla…	-5.5205	2.52228e-05	0.000676191	down	NPS233-1_vs_NPS233-2
Glyma.14G201100	RecName: Full=Probable O-methyltransferase 3 {ECO:0000303|PubMed:18223037}; Short=HlOMT3 {ECO:0000303|PubMed:18223037}; EC=2.1.1.- {ECO:0000305};	-5.51461	6.98989e-05	0.00154361	down	NPS233-1_vs_NPS233-2
Glyma.08G025400	--	-5.51261	0.000677422	0.00977168	down	NPS233-1_vs_NPS233-2
Glyma.04G110400	RecName: Full=Cytochrome P450 71A1; EC=1.14.-.-; AltName: Full=ARP-2; AltName: Full=CYPLXXIA1;	-5.51116	3.93299e-05	0.000971629	down	NPS233-1_vs_NPS233-2
Glyma.15G129200	RecName: Full=Peroxidase 54; Short=Atperox P54; EC=1.11.1.7; AltName: Full=ATP29a; Flags: Precursor;	-5.50566	5.72335e-05	0.00132392	down	NPS233-1_vs_NPS233-2
Glyma.17G076100	RecName: Full=Class V chitinase {ECO:0000303|PubMed:22936594}; Short=AtChiC {ECO:0000303|PubMed:22936594}; EC=3.2.1.14 {ECO:0000269|PubMed:21390509, ECO:0000269|PubMed:22936594}; Flags: Precursor;	-5.50509	0.000119635	0.00237098	down	NPS233-1_vs_NPS233-2
novel.63	--	-5.50483	0.000720002	0.0102701	down	NPS233-1_vs_NPS233-2
Glyma.14G012900	RecName: Full=Cellulose synthase-like protein E1; Short=AtCslE1; EC=2.4.1.-;	-5.50385	6.42395e-05	0.00144779	down	NPS233-1_vs_NPS233-2
Glyma.02G121000	RecName: Full=Salicylate carboxymethyltransferase; EC=2.1.1.274; AltName: Full=S-adenosyl-L-methionine:salicylate acid carboxylmethyltransferase; Short=CbSAMT; AltName: Full=Salicylate O-methyltransferase;	-5.49809	0.00309481	0.0325671	down	NPS233-1_vs_NPS233-2
Glyma.12G099100	--	-5.49621	0.00116628	0.0150421	down	NPS233-1_vs_NPS233-2
Glyma.16G100100	--	-5.49521	0.00086107	0.0117577	down	NPS233-1_vs_NPS233-2
Glyma.01G163000	RecName: Full=Aspartyl protease family protein 1 {ECO:0000305}; EC=3.4.23.- {ECO:0000305}; Flags: Precursor;	-5.49364	0.00110071	0.0143456	down	NPS233-1_vs_NPS233-2
Glyma.03G115200	RecName: Full=UPF0481 protein At3g47200;	-5.49294	0.000168019	0.003168	down	NPS233-1_vs_NPS233-2
Glyma.06G034600	RecName: Full=Probable galacturonosyltransferase-like 2; EC=2.4.1.-;	-5.48972	6.62176e-05	0.00148366	down	NPS233-1_vs_NPS233-2
Glyma.03G132700	RecName: Full=Glucan endo-1,3-beta-glucosidase; EC=3.2.1.39; AltName: Full=(1->3)-beta-glucan endohydrolase; Short=(1->3)-beta-glucanase; AltName: Full=Beta-1,3-endoglucanase; Flags: Precursor;	-5.4809	0.000485733	0.00750003	down	NPS233-1_vs_NPS233-2
Glyma.01G003000	RecName: Full=Transcription factor MYBS3 {ECO:0000303|PubMed:12172034}; AltName: Full=Myb-related protein S3 {ECO:0000303|PubMed:12172034}; Short=OsMYBS3 {ECO:0000303|PubMed:12172034};	-5.47967	0.000386915	0.00627367	down	NPS233-1_vs_NPS233-2
Glyma.14G071600	RecName: Full=Fatty alcohol:caffeoyl-CoA acyltransferase {ECO:0000305}; EC=2.3.1.- {ECO:0000305}; AltName: Full=Fatty alcohol:caffeoyl-CoA caffeoyl transferase {ECO:0000303|PubMed:22797656};	-5.47585	0.000374838	0.00613473	down	NPS233-1_vs_NPS233-2
Glyma.19G050800	RecName: Full=GDSL esterase/lipase At5g33370; EC=3.1.1.-; AltName: Full=Extracellular lipase At5g33370; Flags: Precursor;	-5.47119	9.07137e-05	0.00192038	down	NPS233-1_vs_NPS233-2
Glyma.18G147700	RecName: Full=Nucleobase-ascorbate transporter 11; Short=AtNAT11;	-5.46918	0.000619102	0.00910152	down	NPS233-1_vs_NPS233-2
Glyma.07G196800	RecName: Full=Linoleate 13S-lipoxygenase 3-1, chloroplastic; EC=1.13.11.12; Flags: Precursor;	-5.46739	9.18442e-05	0.00193789	down	NPS233-1_vs_NPS233-2
Glyma.17G072200	RecName: Full=Cellulose synthase A catalytic subunit 7 [UDP-forming]; Short=AtCesA7; EC=2.4.1.12; AltName: Full=Protein FRAGILE FIBER 5; AltName: Full=Protein IRREGULAR XYLEM 3; Short=AtIRX3;	-5.466	0.000294071	0.00502885	down	NPS233-1_vs_NPS233-2
Glyma.01G028500	RecName: Full=Early nodulin-36A; Short=N-36A;	-5.46533	0.00022434	0.00401302	down	NPS233-1_vs_NPS233-2
Glyma.17G233300	--	-5.46129	0.000422663	0.00671883	down	NPS233-1_vs_NPS233-2
Glyma.11G164000	RecName: Full=Laccase-3; EC=1.10.3.2; AltName: Full=Benzenediol:oxygen oxidoreductase 3; AltName: Full=Diphenol oxidase 3; AltName: Full=Urishiol oxidase 3; Flags: Precursor;	-5.45962	9.36214e-05	0.00196836	down	NPS233-1_vs_NPS233-2
Glyma.19G013200	RecName: Full=Senescence-associated carboxylesterase 101; EC=3.1.1.1; Flags: Precursor;	-5.45898	0.000415199	0.00665185	down	NPS233-1_vs_NPS233-2
Glyma.06G195200	RecName: Full=Photosynthetic NDH subunit of subcomplex B 4, chloroplastic {ECO:0000303|PubMed:21785130}; Short=Protein PnsB4 {ECO:0000303|PubMed:21785130}; AltName: Full=NDH DEPENDENT FLOW 6 {ECO:0000303|PubMed:18535009}; AltName: Full=NDH-DEPENDENT CYCLIC ELECTRON FLOW 6 {ECO:0000305}; Flags: Precursor;	-5.45752	0.000589555	0.00876367	down	NPS233-1_vs_NPS233-2
Glyma.04G046900	RecName: Full=Protein argonaute 2;	-5.45564	0.00247556	0.0274233	down	NPS233-1_vs_NPS233-2
Glyma.13G223000	RecName: Full=GDSL esterase/lipase At1g29670; EC=3.1.1.-; AltName: Full=Extracellular lipase At1g29670; Flags: Precursor;	-5.45295	0.000386912	0.00627367	down	NPS233-1_vs_NPS233-2
Glyma.05G130200	RecName: Full=Cytochrome b561 domain-containing protein At4g18260; AltName: Full=Protein b561A.tha13; Flags: Precursor;	-5.45254	6.4774e-06	0.000216827	down	NPS233-1_vs_NPS233-2
Glyma.19G102400	RecName: Full=Light-regulated protein 1, chloroplastic {ECO:0000303|PubMed:8932388}; AltName: Full=Protein CCR-LIKE, chloroplastic {ECO:0000303|PubMed:16055688}; Flags: Precursor;	-5.45044	7.46663e-17	2.51879e-14	down	NPS233-1_vs_NPS233-2
Glyma.15G137400	--	-5.44282	0.000868655	0.0118455	down	NPS233-1_vs_NPS233-2
Glyma.03G034000	RecName: Full=Transcription factor UNE10; AltName: Full=Basic helix-loop-helix protein 16; Short=AtbHLH16; Short=bHLH 16; AltName: Full=Protein UNFERTILIZED EMBRYO SAC 10; AltName: Full=Transcription factor EN 108; AltName: Full=bHLH transcription factor bHLH016;	-5.44102	0.000293369	0.00502246	down	NPS233-1_vs_NPS233-2
Glyma.11G093900	RecName: Full=ABC transporter G family member 15; Short=ABC transporter ABCG.15; Short=AtABCG15; AltName: Full=White-brown complex homolog protein 15; Short=AtWBC15; AltName: Full=White-brown complex homolog protein 22; Short=AtWBC22;	-5.43468	8.37259e-05	0.00179222	down	NPS233-1_vs_NPS233-2
Glyma.13G250400	RecName: Full=(3S,6E)-nerolidol synthase 1; Short=FaNES1; EC=4.2.3.48;	-5.43461	0.00184945	0.0218348	down	NPS233-1_vs_NPS233-2
Glyma.14G211300	RecName: Full=Universal stress protein A-like protein;	-5.43387	0.000470233	0.00732332	down	NPS233-1_vs_NPS233-2
Glyma.17G175700	RecName: Full=Cyclin-dependent kinase inhibitor 7; AltName: Full=Inhibitor/interactor of CDK protein 5; AltName: Full=KIP-related protein 7;	-5.42206	9.75228e-05	0.00202953	down	NPS233-1_vs_NPS233-2
novel.341	--	-5.41869	0.00489554	0.0459974	down	NPS233-1_vs_NPS233-2
Glyma.02G016500	RecName: Full=Probable pectinesterase/pectinesterase inhibitor 40; Includes: RecName: Full=Pectinesterase inhibitor 40; AltName: Full=Pectin methylesterase inhibitor 40; Includes: RecName: Full=Pectinesterase 40; Short=PE 40; EC=3.1.1.11; AltName: Full=Pectin methylesterase 40; Short=AtPME40; Flags: Precursor;	-5.41714	0.000807638	0.0112127	down	NPS233-1_vs_NPS233-2
Glyma.05G195500	RecName: Full=Fatty acid amide hydrolase; EC=3.5.1.99; AltName: Full=N-acylethanolamine amidohydrolase;	-5.41454	5.75184e-11	7.20647e-09	down	NPS233-1_vs_NPS233-2
Glyma.13G200000	RecName: Full=Annexin D4; AltName: Full=AnnAt4;	-5.41312	3.13195e-09	2.7312e-07	down	NPS233-1_vs_NPS233-2
Glyma.02G023400	RecName: Full=Thioredoxin H2; Short=AtTrxh2; AltName: Full=Thioredoxin 2; Short=AtTRX2;	-5.40834	0.000213981	0.00385241	down	NPS233-1_vs_NPS233-2
Glyma.14G053600	RecName: Full=Peroxidase 4 {ECO:0000250|UniProtKB:Q42578}; EC=1.11.1.7; Flags: Precursor;	-5.4071	0.00146135	0.0181053	down	NPS233-1_vs_NPS233-2
Glyma.01G085800	RecName: Full=UDP-glycosyltransferase 83A1; EC=2.4.1.-;	-5.40646	0.000635894	0.00930338	down	NPS233-1_vs_NPS233-2
Glyma.02G167600	RecName: Full=Ubiquitin carboxyl-terminal hydrolase 12; EC=3.4.19.12; AltName: Full=Deubiquitinating enzyme 12; Short=AtUBP12; AltName: Full=Ubiquitin thioesterase 12; AltName: Full=Ubiquitin-specific-processing protease 12;	-5.40416	0.000585921	0.00872656	down	NPS233-1_vs_NPS233-2
Glyma.04G058800	RecName: Full=Protein GLUTAMINE DUMPER 2;	-5.39851	0.000770915	0.0108104	down	NPS233-1_vs_NPS233-2
Glyma.10G021400	RecName: Full=Zinc finger protein CONSTANS-LIKE 13;	-5.38935	0.000800794	0.0111328	down	NPS233-1_vs_NPS233-2
Glyma.01G156200	RecName: Full=Protein PIN-LIKES 3 {ECO:0000303|PubMed:22504182}; AltName: Full=Auxin efflux carrier-like protein 3 {ECO:0000303|PubMed:22504182};	-5.38481	3.73556e-06	0.000136184	down	NPS233-1_vs_NPS233-2
Glyma.08G050300	--	-5.38025	0.000328586	0.00551162	down	NPS233-1_vs_NPS233-2
Glyma.14G172200	--	-5.37814	0.000104078	0.00212418	down	NPS233-1_vs_NPS233-2
Glyma.06G127300	RecName: Full=Putative RING-H2 finger protein ATL21A; EC=2.3.2.27 {ECO:0000305}; AltName: Full=RING-type E3 ubiquitin transferase ATL21A {ECO:0000305}; Flags: Precursor;	-5.37695	0.00111051	0.0144503	down	NPS233-1_vs_NPS233-2
Glyma.04G170100	RecName: Full=Myb-related protein 306;	-5.37521	0.000770454	0.0108089	down	NPS233-1_vs_NPS233-2
Glyma.20G077900	RecName: Full=Umecyanin {ECO:0000303|PubMed:5490233}; Short=UMC {ECO:0000303|PubMed:15631465};	-5.37454	0.00442912	0.0426463	down	NPS233-1_vs_NPS233-2
novel.118	RecName: Full=Retrovirus-related Pol polyprotein from transposon RE1; AltName: Full=Retro element 1 {ECO:0000303|PubMed:10689195}; Short=AtRE1 {ECO:0000303|PubMed:10689195}; Includes: RecName: Full=Protease RE1; EC=3.4.23.-; Includes: RecName: Full=Reverse transcriptase RE1; EC=2.7.7.49; Includes: RecName: Full=Endonuclease RE1;	-5.37454	0.00442912	0.0426463	down	NPS233-1_vs_NPS233-2
Glyma.11G055600	--	-5.37036	0.0021157	0.0242961	down	NPS233-1_vs_NPS233-2
Glyma.10G214500	--	-5.37024	1.19627e-34	3.33824e-31	down	NPS233-1_vs_NPS233-2
Glyma.19G153800	RecName: Full=CSC1-like protein At4g02900;	-5.36952	0.00181759	0.021522	down	NPS233-1_vs_NPS233-2
Glyma.07G121500	RecName: Full=Protein ECERIFERUM 1;	-5.36931	1.08756e-05	0.000335516	down	NPS233-1_vs_NPS233-2
Glyma.03G231100	RecName: Full=Homeobox protein knotted-1-like 1; AltName: Full=Homeobox protein HOS16; AltName: Full=Homeobox protein OSH6;	-5.36785	0.000138219	0.00269897	down	NPS233-1_vs_NPS233-2
Glyma.02G081900	RecName: Full=WAT1-related protein At1g43650;	-5.36729	0.000758994	0.0106774	down	NPS233-1_vs_NPS233-2
Glyma.16G145300	RecName: Full=Serine carboxypeptidase-like 27; EC=3.4.16.-; Flags: Precursor;	-5.3608	2.86171e-09	2.5315e-07	down	NPS233-1_vs_NPS233-2
Glyma.05G201700	RecName: Full=Transcription factor bHLH137; AltName: Full=Basic helix-loop-helix protein 137; Short=AtbHLH137; Short=bHLH 137; AltName: Full=Transcription factor EN 89; AltName: Full=bHLH transcription factor bHLH137;	-5.35872	0.000737221	0.0104574	down	NPS233-1_vs_NPS233-2
Glyma.18G247600	--	-5.35507	0.000994056	0.0132093	down	NPS233-1_vs_NPS233-2
Glyma.19G015200	RecName: Full=Cytochrome P450 82A4; EC=1.14.-.-; AltName: Full=Cytochrome P450 CP9;	-5.35095	0.00457934	0.0437224	down	NPS233-1_vs_NPS233-2
Glyma.06G262400	RecName: Full=Receptor-like serine/threonine-protein kinase SD1-8; EC=2.7.11.1; AltName: Full=Arabidopsis thaliana receptor kinase 3; AltName: Full=S-domain-1 (SD1) receptor kinase 8; Short=SD1-8; Flags: Precursor;	-5.34735	0.000116711	0.00232482	down	NPS233-1_vs_NPS233-2
Glyma.07G017200	--	-5.33668	2.46814e-06	9.6512e-05	down	NPS233-1_vs_NPS233-2
Glyma.10G019700	RecName: Full=Putative indole-3-acetic acid-amido synthetase GH3.9; EC=6.3.2.-; AltName: Full=Auxin-responsive GH3-like protein 9; Short=AtGH3-9;	-5.33668	0.000131442	0.00258471	down	NPS233-1_vs_NPS233-2
Glyma.05G018800	RecName: Full=Agamous-like MADS-box protein AGL8; AltName: Full=Floral homeotic protein AGL8; AltName: Full=Transcription factor FRUITFULL;	-5.33158	4.45672e-08	2.96754e-06	down	NPS233-1_vs_NPS233-2
Glyma.20G007900	RecName: Full=Long chain acyl-CoA synthetase 2; EC=6.2.1.3; AltName: Full=Protein Botrytis resistant 1; AltName: Full=Protein LATERAL ROOT DEVELOPMENT 2;	-5.3284	1.68893e-07	9.49513e-06	down	NPS233-1_vs_NPS233-2
Glyma.01G130000	RecName: Full=Non-specific lipid-transfer protein; Short=LTP; AltName: Allergen=Mal d 3; Flags: Precursor;	-5.32769	0.000150187	0.00286345	down	NPS233-1_vs_NPS233-2
Glyma.11G212000	RecName: Full=Cytochrome P450 94C1 {ECO:0000305}; EC=1.14.14.49 {ECO:0000269|PubMed:22215670, ECO:0000269|PubMed:26164240}; AltName: Full=12-hydroxyjasmonoyl-L-amino acid 12-hydroxylase {ECO:0000303|PubMed:22215670};	-5.32575	0.00308332	0.0324909	down	NPS233-1_vs_NPS233-2
Glyma.09G264900	RecName: Full=Probable methyltransferase PMT15; EC=2.1.1.-;	-5.32474	0.000720535	0.0102729	down	NPS233-1_vs_NPS233-2
Glyma.05G023900	--	-5.32423	0.00149163	0.0184031	down	NPS233-1_vs_NPS233-2
Glyma.02G130500	--	-5.32392	0.000713296	0.0101934	down	NPS233-1_vs_NPS233-2
Glyma.05G133400	RecName: Full=Polygalacturonase At1g48100; Short=PG; EC=3.2.1.15; AltName: Full=Pectinase At1g48100; Flags: Precursor;	-5.32348	0.0031943	0.0332718	down	NPS233-1_vs_NPS233-2
Glyma.03G257500	RecName: Full=Cytochrome b561 and DOMON domain-containing protein At3g61750; AltName: Full=Protein b561A.tha9; Flags: Precursor;	-5.32267	0.000296448	0.00506669	down	NPS233-1_vs_NPS233-2
Glyma.19G151300	RecName: Full=Dirigent protein 21; Short=AtDIR21; Flags: Precursor;	-5.31951	2.06499e-17	7.82554e-15	down	NPS233-1_vs_NPS233-2
Glyma.17G130500	RecName: Full=Glucuronoxylan 4-O-methyltransferase 2; EC=2.1.1.112;	-5.31908	0.00152443	0.0187325	down	NPS233-1_vs_NPS233-2
Glyma.15G081300	RecName: Full=GDSL esterase/lipase At5g45910; EC=3.1.1.-; AltName: Full=Extracellular lipase At5g45910; Flags: Precursor;	-5.31889	1.8063e-05	0.00050775	down	NPS233-1_vs_NPS233-2
Glyma.14G058500	RecName: Full=Protein ESKIMO 1; AltName: Full=Protein trichome birefringence-like 29;	-5.31702	0.00284896	0.0306741	down	NPS233-1_vs_NPS233-2
Glyma.07G083000	RecName: Full=Geraniol 8-hydroxylase; EC=1.14.13.152; AltName: Full=Cytochrome P450 76B6; AltName: Full=Geraniol 10-hydroxylase; Short=CrG10H;	-5.31312	0.000133016	0.00260732	down	NPS233-1_vs_NPS233-2
Glyma.01G191200	RecName: Full=Probable esterase KAI2; AltName: Full=Protein DWARF-14-like; Short=Protein D14-like; AltName: Full=Protein HYPOSENSITIVE TO LIGHT; AltName: Full=Protein KARRIKIN INSENSITIVE 2;	-5.30869	0.00197657	0.0230344	down	NPS233-1_vs_NPS233-2
Glyma.09G125900	RecName: Full=Receptor-like protein EIX2 {ECO:0000305}; AltName: Full=EIX receptor 2 {ECO:0000312|EMBL:AAR28378.1}; Flags: Precursor;	-5.30642	0.00297182	0.0315979	down	NPS233-1_vs_NPS233-2
Glyma.15G118800	RecName: Full=Nuclear transcription factor Y subunit B-3; Short=AtNF-YB-3; AltName: Full=Transcriptional activator HAP3C;	-5.30341	0.000999231	0.0132666	down	NPS233-1_vs_NPS233-2
Glyma.12G035300	RecName: Full=Auxin-induced protein 6B;	-5.3024	0.005201	0.0482326	down	NPS233-1_vs_NPS233-2
Glyma.17G174100	RecName: Full=Phospholipase A1-Igamma2, chloroplastic; EC=3.1.1.-; Flags: Precursor;	-5.29755	0.000242582	0.00428687	down	NPS233-1_vs_NPS233-2
Glyma.14G048000	RecName: Full=Subtilisin-like protease Glyma18g48580; EC=3.4.21.-; Contains: RecName: Full=Subtilase peptide GmSubPep; AltName: Full=Glycine max subtilase peptide; Short=GmSubPep; Flags: Precursor;	-5.29479	2.50734e-15	6.87191e-13	down	NPS233-1_vs_NPS233-2
Glyma.04G109400	RecName: Full=7-deoxyloganetic acid glucosyltransferase; EC=2.4.1.323; AltName: Full=UDP-glucose glucosyltransferase 8; Short=CrUGT8; AltName: Full=UDP-glycosyltransferase 709C2;	-5.29433	0.000145818	0.00280411	down	NPS233-1_vs_NPS233-2
Glyma.02G302100	RecName: Full=Nucleotide-sugar uncharacterized transporter 2 {ECO:0000305};	-5.28948	4.26185e-06	0.000152118	down	NPS233-1_vs_NPS233-2
Glyma.08G240500	--	-5.28931	0.000822322	0.0113377	down	NPS233-1_vs_NPS233-2
Glyma.15G209300	RecName: Full=Polygalacturonase inhibitor 1; AltName: Full=Polygalacturonase-inhibiting protein 1; Short=PGIP-1; Flags: Precursor;	-5.28894	4.1646e-15	1.06531e-12	down	NPS233-1_vs_NPS233-2
Glyma.15G219600	RecName: Full=Thioredoxin domain-containing protein 9 homolog;	-5.28711	0.000179437	0.00334427	down	NPS233-1_vs_NPS233-2
Glyma.16G064100	RecName: Full=MDIS1-interacting receptor like kinase 2 {ECO:0000303|PubMed:26863186}; Short=AtMIK2 {ECO:0000303|PubMed:26863186}; AltName: Full=Probable LRR receptor-like serine/threonine-protein kinase At4g08850; EC=2.7.11.1 {ECO:0000305}; Flags: Precursor;	-5.28089	0.0010805	0.0141317	down	NPS233-1_vs_NPS233-2
Glyma.07G044900	RecName: Full=Protein MARD1 {ECO:0000303|PubMed:15159630}; AltName: Full=Mediator of ABA-regulated dormancy1 {ECO:0000303|PubMed:15159630}; AltName: Full=Senescence-associated protein SAG102 {ECO:0000303|PubMed:11402199};	-5.26969	0.00143912	0.0178703	down	NPS233-1_vs_NPS233-2
Glyma.18G046100	RecName: Full=Cysteine-rich receptor-like protein kinase 2; Short=Cysteine-rich RLK2; EC=2.7.11.-; Flags: Precursor;	-5.2691	0.00137936	0.0172678	down	NPS233-1_vs_NPS233-2
Glyma.07G035800	--	-5.26089	2.2524e-18	9.34321e-16	down	NPS233-1_vs_NPS233-2
Glyma.14G141000	RecName: Full=BURP domain protein RD22 {ECO:0000303|PubMed:9790599}; AltName: Full=Dehydration-responsive protein RD22 {ECO:0000303|PubMed:8479424}; Flags: Precursor;	-5.26053	3.236e-13	6.32689e-11	down	NPS233-1_vs_NPS233-2
Glyma.06G109200	RecName: Full=Inducible nitrate reductase [NADH] 2; Short=NR; EC=1.7.1.1;	-5.25875	0.00155047	0.0189917	down	NPS233-1_vs_NPS233-2
Glyma.08G202300	RecName: Full=Dehydration-responsive element-binding protein 3; AltName: Full=Protein TINY 2;	-5.25243	5.09991e-07	2.51683e-05	down	NPS233-1_vs_NPS233-2
Glyma.12G229000	RecName: Full=AAA-ATPase At3g50940; EC=3.6.1.3 {ECO:0000250|UniProtKB:Q9FLD5}; Flags: Precursor;	-5.24774	0.00167967	0.020164	down	NPS233-1_vs_NPS233-2
Glyma.02G291500	RecName: Full=Protein translation factor SUI1 homolog;	-5.23919	3.36812e-09	2.90415e-07	down	NPS233-1_vs_NPS233-2
Glyma.13G095500	RecName: Full=Zinc finger protein 2 {ECO:0000305}; Short=AtZFP2 {ECO:0000303|PubMed:18192438};	-5.23869	2.01799e-07	1.1121e-05	down	NPS233-1_vs_NPS233-2
Glyma.10G136400	RecName: Full=Actin-related protein 2/3 complex subunit 2B; AltName: Full=Actin-related protein C2B; AltName: Full=Arp2/3 complex 34 kDa subunit; Short=p34-ARC;	-5.23767	0.00474267	0.0449324	down	NPS233-1_vs_NPS233-2
Glyma.12G238200	RecName: Full=Vestitone reductase; EC=1.1.1.348;	-5.23628	0.00153206	0.0188037	down	NPS233-1_vs_NPS233-2
Glyma.17G102900	RecName: Full=Protein IMPAIRED IN BABA-INDUCED STERILITY 1 {ECO:0000303|PubMed:15722464}; EC=2.7.11.- {ECO:0000255|PROSITE-ProRule:PRU00159};	-5.23193	0.00025793	0.00450365	down	NPS233-1_vs_NPS233-2
Glyma.12G217300	RecName: Full=Embryonic abundant protein USP92; Flags: Precursor;	-5.23057	8.81687e-19	3.81187e-16	down	NPS233-1_vs_NPS233-2
Glyma.08G339400	--	-5.22072	0.00395936	0.0392307	down	NPS233-1_vs_NPS233-2
Glyma.18G038000	RecName: Full=Expansin-A3; Short=AtEXPA3; AltName: Full=Alpha-expansin-3; Short=At-EXP3; Short=AtEx3; AltName: Full=Ath-ExpAlpha-1.9; Flags: Precursor;	-5.2207	0.00084821	0.0116183	down	NPS233-1_vs_NPS233-2
Glyma.16G134000	RecName: Full=Salicylate carboxymethyltransferase; EC=2.1.1.274; AltName: Full=S-adenosyl-L-methionine:salicylate acid carboxylmethyltransferase; Short=CbSAMT; AltName: Full=Salicylate O-methyltransferase;	-5.22033	1.07427e-07	6.37828e-06	down	NPS233-1_vs_NPS233-2
Glyma.02G200500	RecName: Full=B3 domain-containing protein At5g06250;	-5.21806	0.000213957	0.00385241	down	NPS233-1_vs_NPS233-2
Glyma.18G185800	--	-5.21686	0.00179107	0.0212848	down	NPS233-1_vs_NPS233-2
Glyma.04G074800	RecName: Full=Flowering-promoting factor 1; Short=SaFPF1;	-5.21658	0.00263016	0.0287724	down	NPS233-1_vs_NPS233-2
Glyma.17G140000	RecName: Full=14 kDa proline-rich protein DC2.15; Flags: Precursor;	-5.21212	8.14279e-17	2.65906e-14	down	NPS233-1_vs_NPS233-2
Glyma.13G362800	--	-5.20707	0.00169823	0.0203657	down	NPS233-1_vs_NPS233-2
Glyma.01G113200	RecName: Full=Glycerol-3-phosphate 2-O-acyltransferase 6; Short=AtGPAT6; EC=2.3.1.198; AltName: Full=Glycerol-3-phosphate acyltransferase 6;	-5.1953	0.000241123	0.004266	down	NPS233-1_vs_NPS233-2
Glyma.09G112700	--	-5.19334	0.00181021	0.0214541	down	NPS233-1_vs_NPS233-2
Glyma.06G045300	RecName: Full=QWRF motif-containing protein 2;	-5.18974	0.00324221	0.033634	down	NPS233-1_vs_NPS233-2
Glyma.14G150000	--	-5.18744	0.000241771	0.00427499	down	NPS233-1_vs_NPS233-2
Glyma.18G294200	RecName: Full=Probable non-specific lipid-transfer protein AKCS9; Short=LTP; Flags: Precursor;	-5.18627	1.01424e-10	1.2236e-08	down	NPS233-1_vs_NPS233-2
Glyma.03G225000	RecName: Full=Transcription factor PIF3; AltName: Full=Basic helix-loop-helix protein 8; Short=AtbHLH8; Short=bHLH 8; AltName: Full=Phytochrome-associated protein 3; AltName: Full=Phytochrome-interacting factor 3; AltName: Full=Transcription factor EN 100; AltName: Full=bHLH transcription factor bHLH008;	-5.1847	0.000327657	0.00550205	down	NPS233-1_vs_NPS233-2
Glyma.08G127600	RecName: Full=Glutelin type-A 2; AltName: Full=Glutelin type II; Contains: RecName: Full=Glutelin type-A 2 acidic chain; Contains: RecName: Full=Glutelin type-A 2 basic chain; Flags: Precursor;	-5.17222	1.41258e-20	8.33855e-18	down	NPS233-1_vs_NPS233-2
Glyma.18G190300	RecName: Full=Probable glutathione S-transferase; EC=2.5.1.18; AltName: Full=G2-4; AltName: Full=Heat shock protein 26A;	-5.16083	2.17648e-10	2.47441e-08	down	NPS233-1_vs_NPS233-2
Glyma.06G106200	RecName: Full=Low affinity sulfate transporter 3;	-5.1587	0.000636552	0.00930338	down	NPS233-1_vs_NPS233-2
Glyma.05G165600	RecName: Full=Disease resistance protein At4g27190;	-5.15684	0.00138711	0.0173436	down	NPS233-1_vs_NPS233-2
Glyma.07G052800	RecName: Full=Ras-related protein RABA3; Short=AtRABA3;	-5.1554	9.38935e-06	0.000296823	down	NPS233-1_vs_NPS233-2
Glyma.16G138400	RecName: Full=Protein RADIALIS-like 6; Short=AtRL6; Short=Protein RAD-like 6; AltName: Full=Protein RADIALIS-LIKE SANT/MYB 3; Short=Protein RSM3;	-5.15447	0.00182378	0.021565	down	NPS233-1_vs_NPS233-2
Glyma.13G356100	RecName: Full=Photosynthetic NDH subunit of subcomplex B 3, chloroplastic {ECO:0000303|PubMed:21785130}; Short=Protein PnsB3 {ECO:0000303|PubMed:21785130}; AltName: Full=NDH-DEPENDENT CYCLIC ELECTRON FLOW 4 {ECO:0000303|PubMed:18785996}; Flags: Precursor;	-5.15306	0.000800659	0.0111328	down	NPS233-1_vs_NPS233-2
Glyma.18G254900	RecName: Full=Beta-glucuronosyltransferase GlcAT14B {ECO:0000305}; EC=2.4.1.- {ECO:0000305}; AltName: Full=GT14 family glucuronic acid transferase 2 {ECO:0000305}; Short=AtGlcAT14B {ECO:0000303|PubMed:24739253};	-5.15238	1.30544e-05	0.000390184	down	NPS233-1_vs_NPS233-2
Glyma.09G149000	RecName: Full=MADS-box transcription factor 6; AltName: Full=OsMADS6; AltName: Full=Protein MOSAIC FLORAL ORGANS 1;	-5.15141	0.00387079	0.0385271	down	NPS233-1_vs_NPS233-2
Glyma.13G158200	RecName: Full=Stellacyanin;	-5.15076	0.000255354	0.00446884	down	NPS233-1_vs_NPS233-2
Glyma.15G145900	RecName: Full=Protein LlR18B; EC=3.1.27.-; AltName: Full=LlPR10.1B;	-5.14994	0.000703054	0.0100751	down	NPS233-1_vs_NPS233-2
Glyma.19G117100	RecName: Full=Cation/calcium exchanger 1; Short=AtCCX1; AltName: Full=Protein CATION EXCHANGER 7;	-5.14408	0.00149039	0.0183952	down	NPS233-1_vs_NPS233-2
Glyma.09G032400	--	-5.14103	3.88517e-20	2.16835e-17	down	NPS233-1_vs_NPS233-2
Glyma.07G134100	RecName: Full=Laccase-17; EC=1.10.3.2; AltName: Full=Benzenediol:oxygen oxidoreductase 17; AltName: Full=Diphenol oxidase 17; AltName: Full=Urishiol oxidase 17; Flags: Precursor;	-5.13746	0.00364023	0.0367326	down	NPS233-1_vs_NPS233-2
Glyma.12G077700	--	-5.13692	1.45669e-05	0.000425042	down	NPS233-1_vs_NPS233-2
Glyma.05G216100	--	-5.1359	2.05875e-07	1.13254e-05	down	NPS233-1_vs_NPS233-2
Glyma.11G000600	RecName: Full=Uncharacterized protein At4g06744; Flags: Precursor;	-5.12114	0.00042151	0.0067144	down	NPS233-1_vs_NPS233-2
Glyma.14G010900	RecName: Full=Fructose-bisphosphate aldolase, cytoplasmic isozyme 1; EC=4.1.2.13;	-5.11529	0.00154256	0.0189174	down	NPS233-1_vs_NPS233-2
Glyma.13G052100	RecName: Full=Agamous-like MADS-box protein AGL8 homolog; Short=MADS B;	-5.11348	0.00181436	0.021495	down	NPS233-1_vs_NPS233-2
Glyma.11G049600	RecName: Full=Peroxidase 51; Short=Atperox P51; EC=1.11.1.7; AltName: Full=ATP37; Flags: Precursor;	-5.11162	6.82678e-21	4.36573e-18	down	NPS233-1_vs_NPS233-2
Glyma.11G184000	RecName: Full=Zinc finger protein WIP3; AltName: Full=WIP-domain protein 3 {ECO:0000303|PubMed:11782451}; Short=AtWIP3 {ECO:0000303|PubMed:11782451};	-5.11033	0.0019311	0.0226248	down	NPS233-1_vs_NPS233-2
Glyma.14G222500	RecName: Full=Thioredoxin-like protein CDSP32, chloroplastic; AltName: Full=Chloroplastic drought-induced stress protein of 32 KDa; Short=AtCDSP32; Flags: Precursor;	-5.1094	3.28226e-12	5.22032e-10	down	NPS233-1_vs_NPS233-2
Glyma.01G171100	RecName: Full=Peroxidase 72; Short=Atperox P72; EC=1.11.1.7; AltName: Full=ATP6a; AltName: Full=PRXR8; Flags: Precursor;	-5.10883	2.18572e-09	2.03312e-07	down	NPS233-1_vs_NPS233-2
Glyma.10G079900	RecName: Full=NDR1/HIN1-like protein 3 {ECO:0000303|Ref.1};	-5.10695	0.00156157	0.0191048	down	NPS233-1_vs_NPS233-2
novel.272	--	-5.0995	0.00178735	0.0212736	down	NPS233-1_vs_NPS233-2
Glyma.15G082800	RecName: Full=Protein LIGHT-DEPENDENT SHORT HYPOCOTYLS 10; AltName: Full=Protein ORGAN BOUNDARY 10;	-5.09503	0.00234276	0.0262267	down	NPS233-1_vs_NPS233-2
Glyma.18G138400	RecName: Full=Carbonic anhydrase, chloroplastic; EC=4.2.1.1; AltName: Full=Carbonate dehydratase; Flags: Precursor;	-5.09377	4.25484e-07	2.14813e-05	down	NPS233-1_vs_NPS233-2
Glyma.03G203000	RecName: Full=Nuclear transcription factor Y subunit A-10; Short=AtNF-YA-10;	-5.09328	0.00064057	0.0093544	down	NPS233-1_vs_NPS233-2
Glyma.07G073400	--	-5.09131	0.00178619	0.021268	down	NPS233-1_vs_NPS233-2
Glyma.06G312100	RecName: Full=Immune-associated nucleotide-binding protein 9 {ECO:0000303|PubMed:17723251}; Short=AtIAN9 {ECO:0000303|PubMed:17723251}; AltName: Full=AIG1-like protein {ECO:0000305};	-5.08756	0.00470777	0.0446845	down	NPS233-1_vs_NPS233-2
Glyma.10G139700	RecName: Full=Germin-like protein subfamily 2 member 4; Flags: Precursor;	-5.07635	1.84005e-05	0.00051516	down	NPS233-1_vs_NPS233-2
Glyma.02G269200	RecName: Full=MDIS1-interacting receptor like kinase 2 {ECO:0000303|PubMed:26863186}; Short=AtMIK2 {ECO:0000303|PubMed:26863186}; AltName: Full=Probable LRR receptor-like serine/threonine-protein kinase At4g08850; EC=2.7.11.1 {ECO:0000305}; Flags: Precursor;	-5.06957	0.00177461	0.0211629	down	NPS233-1_vs_NPS233-2
Glyma.07G020500	RecName: Full=Beta-glucuronosyltransferase GlcAT14A {ECO:0000305}; EC=2.4.1.- {ECO:0000305}; AltName: Full=GT14 family glucuronic acid transferase 1 {ECO:0000305}; Short=AtGlcAT14A {ECO:0000303|PubMed:24128328};	-5.06589	0.00307053	0.0324117	down	NPS233-1_vs_NPS233-2
Glyma.05G147600	RecName: Full=Probable methyltransferase At1g27930; EC=2.1.1.- {ECO:0000305};	-5.06471	0.000396988	0.00641703	down	NPS233-1_vs_NPS233-2
Glyma.13G294400	RecName: Full=Protein E6;	-5.06301	4.6439e-05	0.00110933	down	NPS233-1_vs_NPS233-2
Glyma.19G028200	RecName: Full=Membrane-anchored ubiquitin-fold protein 1; Short=Membrane-anchored ub-fold protein 1; AltName: Full=OsMUB1; Flags: Precursor;	-5.06118	0.00193979	0.0227027	down	NPS233-1_vs_NPS233-2
Glyma.08G153000	--	-5.04758	0.00331277	0.0342041	down	NPS233-1_vs_NPS233-2
Glyma.11G130300	RecName: Full=Linoleate 13S-lipoxygenase 2-1, chloroplastic; EC=1.13.11.12; AltName: Full=Lipoxygenase 2-1; Flags: Precursor;	-5.04723	9.38025e-30	1.7996e-26	down	NPS233-1_vs_NPS233-2
Glyma.15G088900	RecName: Full=GDSL esterase/lipase At1g29670; EC=3.1.1.-; AltName: Full=Extracellular lipase At1g29670; Flags: Precursor;	-5.04652	0.000634252	0.00928865	down	NPS233-1_vs_NPS233-2
Glyma.09G142900	RecName: Full=Cytochrome P450 71A26; EC=1.14.-.-;	-5.04544	0.00384915	0.0383491	down	NPS233-1_vs_NPS233-2
Glyma.05G112200	RecName: Full=Protein LSD1; AltName: Full=Protein LESION SIMULATING DISEASE 1; Short=OsLSD1; AltName: Full=Putative zinc finger LSD1;	-5.04499	8.69715e-15	2.08569e-12	down	NPS233-1_vs_NPS233-2
Glyma.13G265700	RecName: Full=Probable leucine-rich repeat receptor-like serine/threonine-protein kinase At3g14840; EC=2.7.11.1; Flags: Precursor;	-5.03826	1.8398e-06	7.44063e-05	down	NPS233-1_vs_NPS233-2
Glyma.07G244200	RecName: Full=Probable polygalacturonase; Short=PG {ECO:0000250|UniProtKB:Q7M1E7}; EC=3.2.1.15; AltName: Full=Pectinase {ECO:0000250|UniProtKB:Q7M1E7};	-5.0334	0.00211707	0.0243011	down	NPS233-1_vs_NPS233-2
Glyma.09G153700	--	-5.03101	0.0022121	0.0250841	down	NPS233-1_vs_NPS233-2
Glyma.12G094800	RecName: Full=BEL1-like homeodomain protein 1; Short=BEL1-like protein 1; AltName: Full=Protein EMBRYO SAC DEVELOPMENT ARREST 29;	-5.03079	0.00314501	0.0329464	down	NPS233-1_vs_NPS233-2
Glyma.02G221600	RecName: Full=UNC93-like protein 2;	-5.0209	0.00307726	0.0324603	down	NPS233-1_vs_NPS233-2
Glyma.07G008500	RecName: Full=Transcription factor MYB26 {ECO:0000305}; AltName: Full=Myb-related protein 26 {ECO:0000305}; Short=AtMYB26 {ECO:0000303|PubMed:11597504}; AltName: Full=Protein MALE STERILE 35 {ECO:0000303|PubMed:12753590};	-5.01122	0.00333574	0.0343719	down	NPS233-1_vs_NPS233-2
Glyma.05G208500	--	-5.00818	0.00224137	0.0253317	down	NPS233-1_vs_NPS233-2
Glyma.12G231800	RecName: Full=Probable LRR receptor-like serine/threonine-protein kinase At1g53440; EC=2.7.11.1; Flags: Precursor;	-5.0072	1.10509e-09	1.11585e-07	down	NPS233-1_vs_NPS233-2
Glyma.20G053400	RecName: Full=UPF0481 protein At3g47200;	-5.00648	0.000585026	0.00872118	down	NPS233-1_vs_NPS233-2
Glyma.19G012700	RecName: Full=Xyloglucan glycosyltransferase 4; EC=2.4.1.-; AltName: Full=Cellulose synthase-like protein C4; Short=AtCslC4; AltName: Full=Xyloglucan synthase 4;	-5.00554	0.000555765	0.00834218	down	NPS233-1_vs_NPS233-2
Glyma.04G165000	RecName: Full=Flavin-containing monooxygenase FMO GS-OX-like 9; EC=1.8.-.-; AltName: Full=Flavin-monooxygenase glucosinolate S-oxygenase-like 9;	-5.00445	0.00428106	0.0415071	down	NPS233-1_vs_NPS233-2
Glyma.18G220600	RecName: Full=Vestitone reductase; EC=1.1.1.348;	-4.99748	0.00106801	0.0139921	down	NPS233-1_vs_NPS233-2
Glyma.08G156000	RecName: Full=Transcription factor IND; AltName: Full=Basic helix-loop-helix protein 40; Short=AtbHLH40; Short=bHLH 40; AltName: Full=Protein INDEHISCENT; AltName: Full=Transcription factor EN 120; AltName: Full=bHLH transcription factor bHLH040;	-4.98551	0.00396068	0.0392311	down	NPS233-1_vs_NPS233-2
Glyma.06G258900	RecName: Full=G-type lectin S-receptor-like serine/threonine-protein kinase At4g27290; EC=2.7.11.1; Flags: Precursor;	-4.98498	0.00253527	0.0279535	down	NPS233-1_vs_NPS233-2
Glyma.16G076300	RecName: Full=Long-chain-alcohol oxidase FAO4A; EC=1.1.3.20; AltName: Full=Long-chain fatty alcohol oxidase 4A;	-4.98498	0.00253527	0.0279535	down	NPS233-1_vs_NPS233-2
Glyma.08G332300	RecName: Full=E3 ubiquitin-protein ligase At4g11680; EC=2.3.2.27; AltName: Full=RING finger protein At4g11680; AltName: Full=RING-type E3 ubiquitin transferase At4g11680 {ECO:0000305};	-4.98051	0.00282269	0.0304875	down	NPS233-1_vs_NPS233-2
Glyma.14G052500	--	-4.97952	0.00255419	0.0281319	down	NPS233-1_vs_NPS233-2
Glyma.17G116000	RecName: Full=Dynein 8 kDa light chain, flagellar outer arm;	-4.97569	0.00315159	0.0329837	down	NPS233-1_vs_NPS233-2
Glyma.10G066800	RecName: Full=Trihelix transcription factor PTL; AltName: Full=Trihelix DNA-binding protein PETAL LOSS;	-4.97043	0.00265888	0.0290451	down	NPS233-1_vs_NPS233-2
Glyma.08G153400	--	-4.96959	0.000539774	0.00814597	down	NPS233-1_vs_NPS233-2
Glyma.19G244300	RecName: Full=Calmodulin-like protein 11;	-4.96491	0.00294616	0.0313593	down	NPS233-1_vs_NPS233-2
Glyma.15G176000	RecName: Full=Anthocyanin regulatory C1 protein;	-4.96273	3.86542e-08	2.62507e-06	down	NPS233-1_vs_NPS233-2
Glyma.13G305500	RecName: Full=Transcription factor bHLH115; AltName: Full=Basic helix-loop-helix protein 115; Short=AtbHLH115; Short=bHLH 115; AltName: Full=Transcription factor EN 134; AltName: Full=bHLH transcription factor bHLH115;	-4.95923	0.000681208	0.00982169	down	NPS233-1_vs_NPS233-2
Glyma.08G321400	RecName: Full=Aspartyl protease family protein At5g10770; EC=3.4.23.- {ECO:0000305}; Flags: Precursor;	-4.95754	5.38886e-09	4.54441e-07	down	NPS233-1_vs_NPS233-2
Glyma.08G270300	RecName: Full=ABC transporter B family member 2; Short=ABC transporter ABCB.2; Short=AtABCB2; AltName: Full=Multidrug resistance protein 2; AltName: Full=P-glycoprotein 2; Flags: Precursor;	-4.94813	0.00331752	0.0342301	down	NPS233-1_vs_NPS233-2
Glyma.08G069300	--	-4.9436	1.0409e-11	1.48611e-09	down	NPS233-1_vs_NPS233-2
Glyma.17G180400	RecName: Full=L-ascorbate oxidase homolog; EC=1.10.3.-; AltName: Full=Pollen-specific protein NTP303; Flags: Precursor;	-4.93606	5.67578e-08	3.62211e-06	down	NPS233-1_vs_NPS233-2
Glyma.08G069100	--	-4.9349	4.49279e-07	2.26083e-05	down	NPS233-1_vs_NPS233-2
Glyma.15G263700	RecName: Full=Myb family transcription factor APL {ECO:0000303|PubMed:14614507}; Short=AtAPL {ECO:0000303|PubMed:14614507}; AltName: Full=Protein ALTERED PHLOEM DEVELOPMENT {ECO:0000303|PubMed:14614507}; AltName: Full=Protein FE {ECO:0000303|PubMed:26239308}; AltName: Full=Protein PHOSPHATE STARVATION RESPONSE 2 {ECO:0000303|PubMed:15592750}; Short=AtPHR2 {ECO:0000303|PubMed:15592750}; AltName: F…	-4.93331	0.000211941	0.00382916	down	NPS233-1_vs_NPS233-2
Glyma.15G251400	--	-4.93003	0.00517942	0.0480615	down	NPS233-1_vs_NPS233-2
Glyma.13G126300	--	-4.92027	0.000745643	0.0105427	down	NPS233-1_vs_NPS233-2
Glyma.09G138000	--	-4.91734	0.00372016	0.0374161	down	NPS233-1_vs_NPS233-2
Glyma.05G023800	RecName: Full=Flavin-containing monooxygenase FMO GS-OX-like 8 {ECO:0000303|PubMed:17461789}; EC=1.8.-.- {ECO:0000305}; AltName: Full=Flavin-monooxygenase glucosinolate S-oxygenase-like 8 {ECO:0000303|PubMed:17461789};	-4.91574	1.7844e-16	5.53272e-14	down	NPS233-1_vs_NPS233-2
Glyma.09G134200	RecName: Full=Protein DETOXIFICATION 34 {ECO:0000303|PubMed:11739388}; Short=AtDTX34 {ECO:0000303|PubMed:11739388}; AltName: Full=Multidrug and toxic compound extrusion protein 34 {ECO:0000305}; Short=MATE protein 34 {ECO:0000305};	-4.9154	0.00135678	0.0170265	down	NPS233-1_vs_NPS233-2
Glyma.07G015900	RecName: Full=Flavanone 3-dioxygenase 2 {ECO:0000305}; EC=1.14.11.9 {ECO:0000269|PubMed:18413994}; AltName: Full=Flavanone 3-beta-hydroxylase 2 {ECO:0000305}; AltName: Full=Flavanone 3-hydroxylase 2 {ECO:0000303|PubMed:18413994}; Short=OsF3H-2 {ECO:0000303|PubMed:18413994};	-4.91514	0.00117685	0.0151529	down	NPS233-1_vs_NPS233-2
Glyma.15G263600	--	-4.91071	0.00140751	0.0175701	down	NPS233-1_vs_NPS233-2
Glyma.11G254700	RecName: Full=Adenosylhomocysteinase; Short=AdoHcyase; EC=3.3.1.1; AltName: Full=S-adenosyl-L-homocysteine hydrolase;	-4.90237	5.18969e-10	5.53134e-08	down	NPS233-1_vs_NPS233-2
Glyma.02G279700	--	-4.90202	0.000674217	0.00973918	down	NPS233-1_vs_NPS233-2
Glyma.09G238200	RecName: Full=Aquaporin NIP2-1 {ECO:0000305}; AltName: Full=Low silicon protein 1 {ECO:0000303|PubMed:16572174}; AltName: Full=NOD26-like intrinsic protein 2-1 {ECO:0000303|PubMed:16033806}; AltName: Full=OsNIP2;1 {ECO:0000303|PubMed:16033806}; AltName: Full=Silicon influx transporter LSI1 {ECO:0000303|PubMed:17625566};	-4.89967	0.000103327	0.00211449	down	NPS233-1_vs_NPS233-2
Glyma.13G274900	RecName: Full=Squamosa promoter-binding protein 1;	-4.89527	0.00402011	0.0396251	down	NPS233-1_vs_NPS233-2
Glyma.14G159900	RecName: Full=Bidirectional sugar transporter SWEET3 {ECO:0000303|PubMed:21107422}; Short=AtSWEET3 {ECO:0000303|PubMed:21107422}; AltName: Full=Protein SUGARS WILL EVENTUALLY BE EXPORTED TRANSPORTERS 3 {ECO:0000303|PubMed:21107422};	-4.89055	0.00220207	0.0249981	down	NPS233-1_vs_NPS233-2
Glyma.16G110100	RecName: Full=ABC transporter G family member 14; Short=ABC transporter ABCG.14; Short=AtABCG14; AltName: Full=White-brown complex homolog protein 14; Short=AtWBC14;	-4.88723	0.00312003	0.0327315	down	NPS233-1_vs_NPS233-2
Glyma.08G203100	RecName: Full=Auxin-responsive protein IAA27; AltName: Full=Auxin-induced protein 27; AltName: Full=Indoleacetic acid-induced protein 27; AltName: Full=Phytochrome-associated protein 2;	-4.88348	0.00431576	0.0417316	down	NPS233-1_vs_NPS233-2
Glyma.02G010600	RecName: Full=Probable glycerol-3-phosphate acyltransferase 3; Short=AtGPAT3; EC=2.3.1.15;	-4.88103	0.00544964	0.0498327	down	NPS233-1_vs_NPS233-2
Glyma.14G023300	RecName: Full=Protein translation factor SUI1 homolog;	-4.87517	3.43618e-07	1.78472e-05	down	NPS233-1_vs_NPS233-2
Glyma.11G098400	--	-4.86954	1.99388e-06	8.00052e-05	down	NPS233-1_vs_NPS233-2
Glyma.07G259100	--	-4.86076	0.00109596	0.0143034	down	NPS233-1_vs_NPS233-2
Glyma.01G082000	--	-4.85478	0.00183153	0.0216399	down	NPS233-1_vs_NPS233-2
Glyma.20G140500	RecName: Full=Cysteine-rich receptor-like protein kinase 10; Short=Cysteine-rich RLK10; EC=2.7.11.-; AltName: Full=Receptor-like protein kinase 4; Flags: Precursor;	-4.84925	0.00499447	0.0467552	down	NPS233-1_vs_NPS233-2
Glyma.07G167000	--	-4.84548	0.00395624	0.0392124	down	NPS233-1_vs_NPS233-2
Glyma.15G003300	RecName: Full=Probable WRKY transcription factor 40; AltName: Full=WRKY DNA-binding protein 40;	-4.84548	0.00395624	0.0392124	down	NPS233-1_vs_NPS233-2
Glyma.11G112300	--	-4.84485	0.00192557	0.0225686	down	NPS233-1_vs_NPS233-2
Glyma.16G175200	RecName: Full=UDP-glycosyltransferase 1 {ECO:0000303|PubMed:24700248}; Short=PlUGT1 {ECO:0000303|PubMed:24700248}; EC=2.4.1.170 {ECO:0000269|PubMed:24700248}; AltName: Full=Glycosyltransferase UGT88E12 {ECO:0000303|PubMed:24700248}; AltName: Full=UDP-glucose:isoflavone 7-O-glucosyltransferase KGT1 {ECO:0000312|EMBL:AGZ84545.1};	-4.83872	9.3194e-09	7.4497e-07	down	NPS233-1_vs_NPS233-2
Glyma.06G067000	RecName: Full=pEARLI1-like lipid transfer protein 1; AltName: Full=Protein AZELAIC ACID INDUCED 1; Flags: Precursor;	-4.8256	3.06089e-05	0.000792888	down	NPS233-1_vs_NPS233-2
Glyma.19G123300	RecName: Full=Protein PHYTOCHROME KINASE SUBSTRATE 4;	-4.8222	0.00164197	0.0198276	down	NPS233-1_vs_NPS233-2
Glyma.16G208400	RecName: Full=Chloride channel protein CLC-c; Short=AtCLC-c; AltName: Full=CBS domain-containing protein CBSCLC4;	-4.81986	0.00470311	0.0446541	down	NPS233-1_vs_NPS233-2
Glyma.10G186700	--	-4.81975	0.00182146	0.0215459	down	NPS233-1_vs_NPS233-2
Glyma.06G008100	RecName: Full=Fructose-bisphosphate aldolase, chloroplastic {ECO:0000305}; EC=4.1.2.13 {ECO:0000305}; AltName: Full=Chloroplastic aldolase {ECO:0000303|PubMed:8163192}; Short=AldP {ECO:0000303|PubMed:8163192}; Flags: Precursor;	-4.81697	0.00455523	0.0435599	down	NPS233-1_vs_NPS233-2
Glyma.11G161600	RecName: Full=Peroxidase 4 {ECO:0000250|UniProtKB:Q42578}; EC=1.11.1.7; Flags: Precursor;	-4.81501	4.40915e-09	3.75954e-07	down	NPS233-1_vs_NPS233-2
Glyma.08G009700	RecName: Full=NAC domain-containing protein 83 {ECO:0000303|PubMed:15029955}; Short=ANAC083 {ECO:0000303|PubMed:15029955}; AltName: Full=Protein VND-INTERACTING 2 {ECO:0000303|PubMed:20388856};	-4.81364	0.00521929	0.0483583	down	NPS233-1_vs_NPS233-2
Glyma.10G202400	RecName: Full=Cytochrome P450 77A3; EC=1.14.-.-;	-4.80852	2.05457e-14	4.7065e-12	down	NPS233-1_vs_NPS233-2
Glyma.10G012900	RecName: Full=Calvin cycle protein CP12-2, chloroplastic; AltName: Full=CP12 domain-containing protein 2; AltName: Full=Chloroplast protein 12-2; Flags: Precursor;	-4.80843	1.00053e-16	3.23288e-14	down	NPS233-1_vs_NPS233-2
Glyma.13G035800	RecName: Full=Wall-associated receptor kinase 3; EC=2.7.11.-; Flags: Precursor;	-4.80497	0.000983431	0.0130986	down	NPS233-1_vs_NPS233-2
Glyma.09G089500	RecName: Full=Auxilin-like protein 1;	-4.80339	9.4977e-05	0.00199004	down	NPS233-1_vs_NPS233-2
Glyma.15G217100	RecName: Full=MLP-like protein 43;	-4.80301	4.17218e-23	3.65912e-20	down	NPS233-1_vs_NPS233-2
Glyma.12G210600	RecName: Full=Phosphoenolpyruvate carboxylase 2; Short=PEPC 2; Short=PEPCase 2; EC=4.1.1.31;	-4.80227	2.78021e-10	3.10332e-08	down	NPS233-1_vs_NPS233-2
Glyma.18G057000	--	-4.79537	4.44504e-06	0.000157374	down	NPS233-1_vs_NPS233-2
Glyma.17G084600	--	-4.7788	2.93932e-06	0.000110978	down	NPS233-1_vs_NPS233-2
Glyma.14G209400	RecName: Full=Probable polyamine oxidase 4; Short=AtPAO4; EC=1.5.3.16; AltName: Full=Amine oxidase 2;	-4.77419	6.23381e-08	3.9373e-06	down	NPS233-1_vs_NPS233-2
Glyma.15G007800	RecName: Full=G-type lectin S-receptor-like serine/threonine-protein kinase SD2-5; EC=2.7.11.1; AltName: Full=S-domain-2 (SD2) receptor kinase 5; Short=SD2-5; Flags: Precursor;	-4.77347	0.00504961	0.047142	down	NPS233-1_vs_NPS233-2
Glyma.17G239300	RecName: Full=Uncharacterized protein At4g06744; Flags: Precursor;	-4.77347	0.00504961	0.047142	down	NPS233-1_vs_NPS233-2
Glyma.18G110500	RecName: Full=GDSL esterase/lipase At2g42990; EC=3.1.1.-; AltName: Full=Extracellular lipase At2g42990; Flags: Precursor;	-4.76661	1.76579e-10	2.0688e-08	down	NPS233-1_vs_NPS233-2
Glyma.09G239800	--	-4.76189	5.86069e-13	1.10368e-10	down	NPS233-1_vs_NPS233-2
Glyma.13G157200	--	-4.75457	0.00174401	0.0208223	down	NPS233-1_vs_NPS233-2
Glyma.17G066600	RecName: Full=Zinc finger protein CONSTANS-LIKE 5;	-4.75323	0.00181823	0.021522	down	NPS233-1_vs_NPS233-2
Glyma.06G198100	RecName: Full=Flavin-containing monooxygenase FMO GS-OX-like 9; EC=1.8.-.-; AltName: Full=Flavin-monooxygenase glucosinolate S-oxygenase-like 9;	-4.7505	0.00160713	0.0195243	down	NPS233-1_vs_NPS233-2
Glyma.13G045100	RecName: Full=GDSL esterase/lipase At5g33370; EC=3.1.1.-; AltName: Full=Extracellular lipase At5g33370; Flags: Precursor;	-4.74633	1.00663e-07	6.01158e-06	down	NPS233-1_vs_NPS233-2
Glyma.14G110000	--	-4.74368	4.22818e-07	2.13971e-05	down	NPS233-1_vs_NPS233-2
Glyma.02G031700	RecName: Full=Protein ALTERED XYLOGLUCAN 4; AltName: Full=Protein trichome birefringence-like 27;	-4.74154	0.00164585	0.0198667	down	NPS233-1_vs_NPS233-2
Glyma.16G022400	RecName: Full=Calcium-binding protein KIC; AltName: Full=KCBP-interacting calcium-binding protein;	-4.74068	0.00125069	0.0159696	down	NPS233-1_vs_NPS233-2
Glyma.04G056800	--	-4.73933	6.81512e-07	3.24336e-05	down	NPS233-1_vs_NPS233-2
Glyma.05G231900	RecName: Full=Aldehyde dehydrogenase family 2 member C4; EC=1.2.1.3; AltName: Full=ALDH1a; AltName: Full=Protein REDUCED EPIDERMAL FLUORESCENCE 1;	-4.73884	2.29861e-05	0.000621797	down	NPS233-1_vs_NPS233-2
Glyma.01G009200	RecName: Full=Lachrymatory-factor synthase; Flags: Precursor;	-4.73449	0.00144731	0.0179574	down	NPS233-1_vs_NPS233-2
Glyma.16G067700	RecName: Full=Protein SIEVE ELEMENT OCCLUSION B {ECO:0000303|PubMed:20932300}; Short=AtSEOb {ECO:0000303|PubMed:20932300}; AltName: Full=Protein SIEVE ELEMENT OCCLUSION-RELATED 1 {ECO:0000303|PubMed:22470058}; Short=AtSEOR1 {ECO:0000303|PubMed:22470058};	-4.73108	0.000141091	0.00273901	down	NPS233-1_vs_NPS233-2
Glyma.06G014900	RecName: Full=Protein CUP-SHAPED COTYLEDON 3; AltName: Full=NAC domain-containing protein 31; Short=ANAC031; AltName: Full=NAC domain-containing protein CUC3;	-4.73074	0.00318805	0.0332519	down	NPS233-1_vs_NPS233-2
Glyma.05G006600	RecName: Full=Cinnamoyl-CoA reductase-like SNL6 {ECO:0000305}; EC=1.2.-.- {ECO:0000305}; AltName: Full=Protein SUPPRESSOR OF NH1-MEDIATED LESION 6 {ECO:0000303|PubMed:20862311};	-4.72623	0.00305298	0.0322818	down	NPS233-1_vs_NPS233-2
Glyma.12G054700	RecName: Full=Linoleate 13S-lipoxygenase 2-1, chloroplastic; EC=1.13.11.12; AltName: Full=Lipoxygenase 2-1; Flags: Precursor;	-4.71065	5.94328e-08	3.76154e-06	down	NPS233-1_vs_NPS233-2
Glyma.17G066500	RecName: Full=Probable 1-deoxy-D-xylulose-5-phosphate synthase 2, chloroplastic; Short=1-deoxyxylulose-5-phosphate synthase; Short=DXP synthase; Short=DXPS; EC=2.2.1.7; Flags: Precursor;	-4.70534	0.00149756	0.0184614	down	NPS233-1_vs_NPS233-2
Glyma.08G155700	RecName: Full=Auxin-induced protein 10A5;	-4.69614	0.00133004	0.0167529	down	NPS233-1_vs_NPS233-2
Glyma.07G255800	RecName: Full=Endo-1,3;1,4-beta-D-glucanase; EC=3.2.1.-; Flags: Precursor;	-4.69221	1.06865e-08	8.3896e-07	down	NPS233-1_vs_NPS233-2
Glyma.01G045200	--	-4.68938	0.000356143	0.00589334	down	NPS233-1_vs_NPS233-2
Glyma.06G242900	RecName: Full=Metallothionein-like protein type 3; Short=MT-3;	-4.68285	0.000305884	0.00520477	down	NPS233-1_vs_NPS233-2
Glyma.19G212600	RecName: Full=Probable pectinesterase/pectinesterase inhibitor 39; Includes: RecName: Full=Pectinesterase inhibitor 39; AltName: Full=Pectin methylesterase inhibitor 39; Includes: RecName: Full=Pectinesterase 39; Short=PE 39; EC=3.1.1.11; AltName: Full=Pectin methylesterase 39; Short=AtPME39; Flags: Precursor;	-4.6805	1.03117e-16	3.26316e-14	down	NPS233-1_vs_NPS233-2
Glyma.01G078200	RecName: Full=Auxin-responsive protein SAUR36 {ECO:0000305}; AltName: Full=Protein RESPONSE TO AUXINS AND GIBBERELLINS 1 {ECO:0000303|PubMed:23503980}; AltName: Full=Protein SENESCENCE-ASSOCIATED GENE 201 {ECO:0000305}; AltName: Full=Protein SMALL AUXIN UP RNA 36 {ECO:0000303|PubMed:12036261};	-4.67957	0.00275712	0.029956	down	NPS233-1_vs_NPS233-2
Glyma.12G076700	RecName: Full=Cytokinin riboside 5'-monophosphate phosphoribohydrolase LOG1; EC=3.2.2.n1; AltName: Full=Protein LONELY GUY 1;	-4.67609	4.35919e-05	0.00105445	down	NPS233-1_vs_NPS233-2
Glyma.10G196500	--	-4.66323	0.00357308	0.0362217	down	NPS233-1_vs_NPS233-2
Glyma.13G054700	--	-4.66122	0.00157122	0.0191923	down	NPS233-1_vs_NPS233-2
Glyma.08G187600	RecName: Full=Potassium channel AKT2/3;	-4.6597	1.44029e-07	8.29477e-06	down	NPS233-1_vs_NPS233-2
Glyma.18G258400	RecName: Full=Homeobox-leucine zipper protein ATHB-20; AltName: Full=HD-ZIP protein ATHB-20; AltName: Full=Homeodomain transcription factor ATHB-20;	-4.65298	9.31132e-12	1.34821e-09	down	NPS233-1_vs_NPS233-2
Glyma.11G244900	RecName: Full=Probable pectate lyase 5; EC=4.2.2.2; Flags: Precursor;	-4.63628	1.21483e-05	0.000366469	down	NPS233-1_vs_NPS233-2
Glyma.03G128000	--	-4.63355	0.00179405	0.0213038	down	NPS233-1_vs_NPS233-2
Glyma.05G236300	RecName: Full=Protein PLANT CADMIUM RESISTANCE 2; Short=AtPCR2;	-4.63301	0.00260694	0.0285387	down	NPS233-1_vs_NPS233-2
Glyma.14G099200	RecName: Full=Thermospermine synthase ACAULIS5; EC=2.5.1.79;	-4.61409	0.00287814	0.0308799	down	NPS233-1_vs_NPS233-2
Glyma.03G261500	RecName: Full=Protein CURVATURE THYLAKOID 1B, chloroplastic; AltName: Full=Photosystem I protein P; AltName: Full=Thylakoid membrane phosphoprotein 14 kDa; Flags: Precursor;	-4.60996	3.22447e-12	5.15512e-10	down	NPS233-1_vs_NPS233-2
Glyma.17G140200	RecName: Full=Lipid transfer protein EARLI 1; AltName: Full=Protein EARLY ARABIDOPSIS ALUMINUM INDUCED 1; Short=pEARLI1; Flags: Precursor;	-4.60673	7.67269e-11	9.42083e-09	down	NPS233-1_vs_NPS233-2
Glyma.13G368500	RecName: Full=Transcription factor bHLH25; AltName: Full=Basic helix-loop-helix protein 25; Short=AtbHLH25; Short=bHLH 25; AltName: Full=Transcription factor EN 29; AltName: Full=bHLH transcription factor bHLH025;	-4.59863	0.00037122	0.00609356	down	NPS233-1_vs_NPS233-2
Glyma.07G021000	RecName: Full=AP2-like ethylene-responsive transcription factor At1g16060;	-4.59128	0.00427696	0.0414804	down	NPS233-1_vs_NPS233-2
novel.784	--	-4.59026	8.11502e-06	0.000260836	down	NPS233-1_vs_NPS233-2
Glyma.09G163900	RecName: Full=Kunitz trypsin inhibitor 2 {ECO:0000305}; Short=AtKTI2 {ECO:0000305}; Flags: Precursor;	-4.58612	1.70249e-05	0.000483454	down	NPS233-1_vs_NPS233-2
Glyma.12G043800	RecName: Full=Glucan endo-1,3-beta-glucosidase 7; EC=3.2.1.39; AltName: Full=(1->3)-beta-glucan endohydrolase 7; Short=(1->3)-beta-glucanase 7; AltName: Full=Beta-1,3-endoglucanase 7; Short=Beta-1,3-glucanase 7; Flags: Precursor;	-4.58578	6.69056e-05	0.00149363	down	NPS233-1_vs_NPS233-2
Glyma.19G250000	RecName: Full=GDSL esterase/lipase LTL1; EC=3.1.1.-; AltName: Full=Extracellular lipase LTL1; AltName: Full=Lithium-tolerant lipase 1; Short=AtLTL1; Short=Li-tolerant lipase 1; Flags: Precursor;	-4.58354	0.000224234	0.00401302	down	NPS233-1_vs_NPS233-2
Glyma.17G225500	RecName: Full=Thermospermine synthase ACAULIS5; EC=2.5.1.79;	-4.5835	0.00201443	0.023378	down	NPS233-1_vs_NPS233-2
Glyma.11G193200	--	-4.58178	5.5792e-11	7.04487e-09	down	NPS233-1_vs_NPS233-2
Glyma.20G139000	RecName: Full=Cysteine-rich receptor-like protein kinase 26; Short=Cysteine-rich RLK26; EC=2.7.11.-; Flags: Precursor;	-4.58177	0.00271538	0.0295572	down	NPS233-1_vs_NPS233-2
Glyma.04G035100	RecName: Full=Wall-associated receptor kinase-like 14; EC=2.7.11.-; Flags: Precursor;	-4.57496	0.00232052	0.0260251	down	NPS233-1_vs_NPS233-2
Glyma.10G247600	RecName: Full=Transcription repressor OFP12; AltName: Full=Ovate family protein 12; Short=AtOFP12;	-4.57337	0.00225871	0.0254535	down	NPS233-1_vs_NPS233-2
Glyma.16G178000	RecName: Full=Heavy metal-associated isoprenylated plant protein 39 {ECO:0000303|PubMed:21072340, ECO:0000303|PubMed:23368984}; Short=AtHIP39 {ECO:0000303|PubMed:21072340, ECO:0000303|PubMed:23368984}; Flags: Precursor;	-4.56917	0.00035496	0.00588011	down	NPS233-1_vs_NPS233-2
Glyma.14G093100	RecName: Full=Metallothionein-like protein 1; AltName: Full=Metallothionein-like protein B; Short=MT-B;	-4.56788	7.80382e-17	2.60376e-14	down	NPS233-1_vs_NPS233-2
Glyma.06G134800	--	-4.56578	0.00257448	0.0282754	down	NPS233-1_vs_NPS233-2
Glyma.14G205300	RecName: Full=Disease resistance protein At4g27190;	-4.56362	0.00231305	0.0259603	down	NPS233-1_vs_NPS233-2
Glyma.14G217800	RecName: Full=Auxin-responsive protein SAUR50 {ECO:0000303|PubMed:12036261}; AltName: Full=Protein SMALL AUXIN UP RNA 50 {ECO:0000303|PubMed:12036261};	-4.56103	0.00249831	0.0276155	down	NPS233-1_vs_NPS233-2
Glyma.04G159300	RecName: Full=Agamous-like MADS-box protein AGL8; AltName: Full=Floral homeotic protein AGL8; AltName: Full=Transcription factor FRUITFULL;	-4.55801	3.6757e-14	7.94572e-12	down	NPS233-1_vs_NPS233-2
Glyma.06G211300	RecName: Full=Palmitoyl-acyl carrier protein thioesterase, chloroplastic; EC=3.1.2.-; AltName: Full=16:0-acyl-carrier protein thioesterase; Short=16:0-ACP thioesterase; AltName: Full=Acyl-[acyl-carrier-protein] hydrolase; AltName: Full=PATE; Flags: Precursor;	-4.55617	5.82732e-09	4.86074e-07	down	NPS233-1_vs_NPS233-2
Glyma.12G227100	--	-4.53656	3.88581e-06	0.000140992	down	NPS233-1_vs_NPS233-2
Glyma.11G213000	RecName: Full=Glutamate decarboxylase 1; Short=GAD 1; EC=4.1.1.15;	-4.5346	5.60403e-17	2.00025e-14	down	NPS233-1_vs_NPS233-2
novel.375	--	-4.52414	0.00288956	0.0309807	down	NPS233-1_vs_NPS233-2
Glyma.09G095700	RecName: Full=Homeobox protein knotted-1-like 3; AltName: Full=Protein KNAT3;	-4.51204	0.00373893	0.0375557	down	NPS233-1_vs_NPS233-2
Glyma.10G274300	RecName: Full=Zinc finger protein CONSTANS-LIKE 16;	-4.51099	0.00456574	0.0436332	down	NPS233-1_vs_NPS233-2
Glyma.12G215100	RecName: Full=Photosynthetic NDH subunit of lumenal location 3, chloroplastic {ECO:0000303|PubMed:21785130}; AltName: Full=PsbQ-like protein 2; Flags: Precursor;	-4.50597	0.00299152	0.0317523	down	NPS233-1_vs_NPS233-2
Glyma.08G050500	RecName: Full=Protein DETOXIFICATION 16 {ECO:0000303|PubMed:11739388}; Short=AtDTX16 {ECO:0000303|PubMed:11739388}; AltName: Full=Multidrug and toxic compound extrusion protein 16 {ECO:0000305}; Short=MATE protein 16 {ECO:0000305};	-4.50086	0.0048151	0.0454626	down	NPS233-1_vs_NPS233-2
Glyma.17G042600	--	-4.49936	3.88926e-08	2.63542e-06	down	NPS233-1_vs_NPS233-2
Glyma.13G035700	RecName: Full=Wall-associated receptor kinase 5; EC=2.7.11.-; Flags: Precursor;	-4.49183	0.000734448	0.0104279	down	NPS233-1_vs_NPS233-2
Glyma.17G205900	RecName: Full=DUF21 domain-containing protein At1g47330; AltName: Full=CBS domain-containing protein CBSDUF7;	-4.49085	1.63841e-05	0.000470463	down	NPS233-1_vs_NPS233-2
Glyma.20G021500	RecName: Full=Protein PHLOEM PROTEIN 2-LIKE A1; Short=AtPP2-A1;	-4.48583	7.286e-05	0.00159523	down	NPS233-1_vs_NPS233-2
Glyma.11G233100	RecName: Full=Protein trichome birefringence-like 33;	-4.48548	0.000466931	0.00728669	down	NPS233-1_vs_NPS233-2
Glyma.01G152900	RecName: Full=Long-chain-alcohol oxidase FAO4A; EC=1.1.3.20; AltName: Full=Long-chain fatty alcohol oxidase 4A;	-4.47884	0.00506019	0.0472121	down	NPS233-1_vs_NPS233-2
Glyma.20G214200	RecName: Full=Peroxidase 47; Short=Atperox P47; EC=1.11.1.7; AltName: Full=ATP32; Flags: Precursor;	-4.46549	0.00317903	0.0332029	down	NPS233-1_vs_NPS233-2
Glyma.15G077500	--	-4.46537	0.000466796	0.00728669	down	NPS233-1_vs_NPS233-2
Glyma.18G207700	RecName: Full=Dirigent protein 20; Short=AtDIR20; Flags: Precursor;	-4.46265	0.00298526	0.0317077	down	NPS233-1_vs_NPS233-2
Glyma.01G024300	--	-4.45867	0.00352793	0.0358944	down	NPS233-1_vs_NPS233-2
Glyma.05G073800	RecName: Full=Ankyrin repeat-containing protein At2g01680;	-4.45666	7.24675e-05	0.00158777	down	NPS233-1_vs_NPS233-2
Glyma.17G109800	RecName: Full=Heptahelical transmembrane protein 1; AltName: Full=PAQR family protein HHP1;	-4.45498	0.0031854	0.0332356	down	NPS233-1_vs_NPS233-2
Glyma.09G054200	--	-4.45282	2.70593e-07	1.43704e-05	down	NPS233-1_vs_NPS233-2
Glyma.12G015300	RecName: Full=Alcohol dehydrogenase-like 2; EC=1.1.1.1 {ECO:0000250|UniProtKB:P06525};	-4.44365	0.000284534	0.00489762	down	NPS233-1_vs_NPS233-2
Glyma.19G253500	--	-4.44232	0.000363449	0.00598009	down	NPS233-1_vs_NPS233-2
Glyma.13G002000	RecName: Full=Early nodulin-like protein 1; AltName: Full=Phytocyanin-like protein; Flags: Precursor;	-4.43956	7.87139e-05	0.00169846	down	NPS233-1_vs_NPS233-2
Glyma.06G158800	RecName: Full=Aspartic proteinase nepenthesin-1; EC=3.4.23.12; AltName: Full=Nepenthesin-I; Flags: Precursor;	-4.43137	0.00402517	0.039642	down	NPS233-1_vs_NPS233-2
Glyma.18G036500	RecName: Full=L-type lectin-domain containing receptor kinase S.4 {ECO:0000303|PubMed:19773388}; Short=LecRK-S.4 {ECO:0000303|PubMed:19773388}; EC=2.7.11.1 {ECO:0000255|PROSITE-ProRule:PRU00159}; Flags: Precursor;	-4.42597	0.00433067	0.0418558	down	NPS233-1_vs_NPS233-2
Glyma.17G015100	--	-4.4255	0.00357879	0.0362676	down	NPS233-1_vs_NPS233-2
Glyma.06G129800	--	-4.40585	0.000610812	0.00899687	down	NPS233-1_vs_NPS233-2
Glyma.02G031300	RecName: Full=Protein ALTERED XYLOGLUCAN 4; AltName: Full=Protein trichome birefringence-like 27;	-4.40004	0.00509908	0.0474883	down	NPS233-1_vs_NPS233-2
Glyma.15G202600	--	-4.39853	0.00126103	0.0160883	down	NPS233-1_vs_NPS233-2
Glyma.05G085700	RecName: Full=Protein IRX15-LIKE;	-4.39271	3.355e-05	0.000853939	down	NPS233-1_vs_NPS233-2
Glyma.03G117500	RecName: Full=Squamosa promoter-binding-like protein 8;	-4.39104	1.16118e-06	5.04866e-05	down	NPS233-1_vs_NPS233-2
Glyma.19G123200	--	-4.38745	0.00398704	0.0393904	down	NPS233-1_vs_NPS233-2
Glyma.18G184000	--	-4.38018	0.00494752	0.0463864	down	NPS233-1_vs_NPS233-2
Glyma.08G036600	RecName: Full=Embryonic abundant protein USP92; Flags: Precursor;	-4.37279	0.00449776	0.0431583	down	NPS233-1_vs_NPS233-2
Glyma.15G077600	RecName: Full=Protein E6;	-4.36887	0.00121892	0.0156226	down	NPS233-1_vs_NPS233-2
Glyma.18G278100	RecName: Full=Zinc finger protein CONSTANS-LIKE 2;	-4.3682	0.00514635	0.0478323	down	NPS233-1_vs_NPS233-2
Glyma.04G137200	--	-4.3609	1.30351e-27	1.90537e-24	down	NPS233-1_vs_NPS233-2
Glyma.13G115300	RecName: Full=Probable pectinesterase/pectinesterase inhibitor 12; Includes: RecName: Full=Pectinesterase inhibitor 12; AltName: Full=Pectin methylesterase inhibitor 12; Includes: RecName: Full=Pectinesterase 12; Short=PE 12; EC=3.1.1.11; AltName: Full=Pectin methylesterase 12; Short=AtPME12; Flags: Precursor;	-4.34832	9.89429e-11	1.20522e-08	down	NPS233-1_vs_NPS233-2
Glyma.04G229900	--	-4.34804	4.48513e-27	5.73648e-24	down	NPS233-1_vs_NPS233-2
Glyma.05G203300	RecName: Full=11-beta-hydroxysteroid dehydrogenase 1B; EC=1.1.1.146; AltName: Full=17-beta-hydroxysteroid dehydrogenase 1B; EC=1.1.1.-; AltName: Full=Hydroxysteroid dehydrogenase 1; Short=AtHSD1;	-4.34653	4.0493e-05	0.000995971	down	NPS233-1_vs_NPS233-2
Glyma.13G311200	RecName: Full=Putative axial regulator YABBY 2;	-4.34518	2.62184e-08	1.85438e-06	down	NPS233-1_vs_NPS233-2
Glyma.20G115500	RecName: Full=3-ketoacyl-CoA synthase 6 {ECO:0000303|PubMed:18465198}; Short=KCS-6 {ECO:0000303|PubMed:18465198}; EC=2.3.1.199 {ECO:0000269|PubMed:10330468}; AltName: Full=Cuticular protein 1 {ECO:0000303|PubMed:10330468}; AltName: Full=Eceriferum 6 {ECO:0000303|PubMed:11041893}; AltName: Full=Very long-chain fatty acid condensing enzyme 6 {ECO:0000303|PubMed:18465198}; Short=VLCFA condensing enz…	-4.33952	0.000302639	0.00515814	down	NPS233-1_vs_NPS233-2
Glyma.14G089800	RecName: Full=Protein PELPK2 {ECO:0000305}; AltName: Full=Protein Pro-Glu-Leu|Ile|Val-Pro-Lys 2 {ECO:0000303|PubMed:21559969}; Flags: Precursor;	-4.33807	0.000741638	0.0105006	down	NPS233-1_vs_NPS233-2
Glyma.14G175800	RecName: Full=7-deoxyloganetin glucosyltransferase; EC=2.4.1.324; AltName: Full=Genipin glucosyltransferase; AltName: Full=UDP-glucose glucosyltransferase 2; Short=GjUGT2; AltName: Full=UDP-glycosyltransferase 85A24;	-4.33526	4.4586e-06	0.000157493	down	NPS233-1_vs_NPS233-2
Glyma.09G180800	RecName: Full=Reticulon-like protein B9; Short=AtRTNLB9;	-4.33449	0.00496703	0.0465551	down	NPS233-1_vs_NPS233-2
Glyma.01G162500	--	-4.33239	0.000872702	0.0118918	down	NPS233-1_vs_NPS233-2
Glyma.15G272700	--	-4.32095	0.00128846	0.0163432	down	NPS233-1_vs_NPS233-2
Glyma.17G192000	RecName: Full=Amino acid permease 6; AltName: Full=Amino acid transporter AAP6;	-4.31898	2.71405e-05	0.000720056	down	NPS233-1_vs_NPS233-2
Glyma.19G045400	--	-4.31623	2.95667e-06	0.000111496	down	NPS233-1_vs_NPS233-2
Glyma.08G220800	RecName: Full=AP2-like ethylene-responsive transcription factor At1g16060;	-4.31338	0.00489894	0.0460153	down	NPS233-1_vs_NPS233-2
Glyma.13G270000	RecName: Full=GEM-like protein 2;	-4.31185	0.000269511	0.00467132	down	NPS233-1_vs_NPS233-2
Glyma.03G258400	RecName: Full=Uncharacterized protein At4g00950;	-4.31121	6.65597e-05	0.00148807	down	NPS233-1_vs_NPS233-2
Glyma.06G028000	RecName: Full=Protein WALLS ARE THIN 1;	-4.30991	1.17811e-06	5.1078e-05	down	NPS233-1_vs_NPS233-2
Glyma.16G094100	RecName: Full=Galactan beta-1,4-galactosyltransferase GALS2 {ECO:0000305}; EC=2.4.1.- {ECO:0000305}; AltName: Full=Beta-1,4-galactan synthase; AltName: Full=Galactan synthase 2 {ECO:0000303|PubMed:23243126};	-4.30634	0.00103979	0.0136926	down	NPS233-1_vs_NPS233-2
Glyma.02G197600	RecName: Full=NDR1/HIN1-like protein 1 {ECO:0000303|Ref.1};	-4.30151	0.000973837	0.0130139	down	NPS233-1_vs_NPS233-2
Glyma.10G158900	--	-4.29934	0.0042175	0.0410074	down	NPS233-1_vs_NPS233-2
Glyma.13G176200	RecName: Full=17.5 kDa class I heat shock protein; AltName: Full=HSP 17.5-E;	-4.29884	4.088e-05	0.00100308	down	NPS233-1_vs_NPS233-2
Glyma.20G012900	RecName: Full=Uncharacterized protein At4g06744; Flags: Precursor;	-4.29559	1.46311e-21	1.12279e-18	down	NPS233-1_vs_NPS233-2
Glyma.09G075500	RecName: Full=TMV resistance protein N;	-4.29491	0.00120423	0.0154472	down	NPS233-1_vs_NPS233-2
Glyma.18G055700	RecName: Full=Protein TIC110, chloroplastic; AltName: Full=Chloroplast inner envelope protein, 110 kDa; Short=psIEP110; AltName: Full=IAP100; AltName: Full=Translocon at the inner envelope membrane of chloroplasts 110; Flags: Precursor;	-4.29271	0.00259949	0.0284864	down	NPS233-1_vs_NPS233-2
Glyma.08G287500	RecName: Full=Polygalacturonase 1 beta-like protein 3 {ECO:0000303|PubMed:26106400}; Short=AtPGL3 {ECO:0000303|PubMed:26106400}; AltName: Full=Aromatic-rich glycoprotein JP650; AltName: Full=PG1beta-like protein 3 {ECO:0000303|PubMed:26106400}; AltName: Full=Polygalacturonase 2 {ECO:0000303|PubMed:19639386}; AltName: Full=Probable polygalacturonase non-catalytic subunit JP650; Flags: Precursor;	-4.28859	4.02818e-05	0.000991572	down	NPS233-1_vs_NPS233-2
Glyma.12G114900	RecName: Full=O-acyltransferase WSD1; AltName: Full=Diacylglycerol O-acyltransferase; Short=DGAT; EC=2.3.1.20; AltName: Full=Long-chain-alcohol O-fatty-acyltransferase; EC=2.3.1.75; AltName: Full=Wax synthase; Short=WS;	-4.28628	1.39483e-05	0.000409719	down	NPS233-1_vs_NPS233-2
novel.57	--	-4.28539	5.08807e-10	5.44192e-08	down	NPS233-1_vs_NPS233-2
Glyma.20G232900	RecName: Full=Amidase 1 {ECO:0000303|PubMed:16738862}; Short=AtAMI1 {ECO:0000303|PubMed:12620340}; EC=3.5.1.4 {ECO:0000269|PubMed:12620340, ECO:0000269|PubMed:17555521, ECO:0000269|PubMed:27135507}; AltName: Full=Translocon at the outer membrane of chloroplasts 64-I {ECO:0000305}; Short=AtTOC64-I {ECO:0000303|PubMed:14741350};	-4.28263	6.90409e-05	0.00153017	down	NPS233-1_vs_NPS233-2
Glyma.04G191700	RecName: Full=CBBY-like protein {ECO:0000303|PubMed:27246049}; Short=AtCbby {ECO:0000303|PubMed:27246049}; EC=3.1.3.- {ECO:0000269|PubMed:27246049}; Flags: Precursor;	-4.2801	0.00136078	0.0170561	down	NPS233-1_vs_NPS233-2
Glyma.20G026700	RecName: Full=Alpha-1,4 glucan phosphorylase L-2 isozyme, chloroplastic/amyloplastic; EC=2.4.1.1; AltName: Full=Starch phosphorylase L-2; Flags: Precursor;	-4.2756	0.000960832	0.0128793	down	NPS233-1_vs_NPS233-2
Glyma.04G255400	RecName: Full=Cellulose synthase-like protein G1; Short=AtCslG1; EC=2.4.1.-;	-4.27217	2.22283e-05	0.000605431	down	NPS233-1_vs_NPS233-2
Glyma.15G034400	RecName: Full=Aldehyde dehydrogenase family 3 member F1; EC=1.2.1.3;	-4.27	4.05965e-12	6.29368e-10	down	NPS233-1_vs_NPS233-2
Glyma.08G213000	--	-4.26428	9.37886e-06	0.000296798	down	NPS233-1_vs_NPS233-2
Glyma.05G183600	--	-4.25807	0.00154669	0.0189529	down	NPS233-1_vs_NPS233-2
Glyma.14G027400	RecName: Full=Probable galacturonosyltransferase 15; EC=2.4.1.-;	-4.25759	1.45752e-07	8.37829e-06	down	NPS233-1_vs_NPS233-2
Glyma.01G062400	RecName: Full=Primary amine oxidase; EC=1.4.3.21 {ECO:0000250|UniProtKB:P12807}; AltName: Full=Amine oxidase [copper-containing]; Flags: Precursor;	-4.25221	0.00342355	0.0350298	down	NPS233-1_vs_NPS233-2
Glyma.02G088900	RecName: Full=Probable non-specific lipid-transfer protein AKCS9; Short=LTP; Flags: Precursor;	-4.24789	5.30086e-09	4.48251e-07	down	NPS233-1_vs_NPS233-2
Glyma.07G036000	--	-4.24393	0.00168548	0.0202257	down	NPS233-1_vs_NPS233-2
Glyma.13G229000	--	-4.2405	9.47663e-05	0.00198699	down	NPS233-1_vs_NPS233-2
Glyma.15G128700	RecName: Full=Peroxidase 22; Short=Atperox P22; EC=1.11.1.7; AltName: Full=ATPEa; AltName: Full=Basic peroxidase E; Flags: Precursor;	-4.23735	1.68379e-05	0.000480402	down	NPS233-1_vs_NPS233-2
Glyma.03G247500	RecName: Full=Hevein-like preproprotein; Contains: RecName: Full=CB-HEL; Contains: RecName: Full=CD-HEL; EC=3.1.-.-; AltName: Full=RNase; Flags: Precursor;	-4.22236	0.000284222	0.0048959	down	NPS233-1_vs_NPS233-2
Glyma.05G044600	RecName: Full=GDSL esterase/lipase At3g48460; EC=3.1.1.-; AltName: Full=Extracellular lipase At3g48460; Flags: Precursor;	-4.22025	5.59991e-11	7.04487e-09	down	NPS233-1_vs_NPS233-2
Glyma.02G020000	RecName: Full=Ubiquitin-conjugating enzyme E2 2; EC=2.3.2.23; AltName: Full=E2 ubiquitin-conjugating enzyme 2; AltName: Full=Ubiquitin carrier protein 2; AltName: Full=Ubiquitin-conjugating enzyme E2-17 kDa 2; AltName: Full=Ubiquitin-protein ligase 2;	-4.21203	1.5063e-06	6.22307e-05	down	NPS233-1_vs_NPS233-2
Glyma.U025800	RecName: Full=Squamosa promoter-binding protein 1;	-4.20758	1.06038e-05	0.000328118	down	NPS233-1_vs_NPS233-2
Glyma.19G041300	RecName: Full=Protein trichome birefringence-like 19;	-4.20638	1.80196e-07	1.00569e-05	down	NPS233-1_vs_NPS233-2
Glyma.14G038200	RecName: Full=Cysteine proteinase inhibitor; AltName: Full=Cystatin;	-4.20398	2.87335e-37	1.26e-33	down	NPS233-1_vs_NPS233-2
Glyma.16G131700	RecName: Full=Aldehyde dehydrogenase family 3 member F1; EC=1.2.1.3;	-4.19331	5.21268e-06	0.00018019	down	NPS233-1_vs_NPS233-2
Glyma.07G003400	RecName: Full=D-3-phosphoglycerate dehydrogenase 2, chloroplastic; Short=PGDH; EC=1.1.1.95 {ECO:0000269|PubMed:24368794, ECO:0000269|PubMed:9867856}; Flags: Precursor;	-4.19306	2.26494e-14	5.14996e-12	down	NPS233-1_vs_NPS233-2
Glyma.11G072000	RecName: Full=Peroxidase 72; Short=Atperox P72; EC=1.11.1.7; AltName: Full=ATP6a; AltName: Full=PRXR8; Flags: Precursor;	-4.19147	2.01761e-06	8.06364e-05	down	NPS233-1_vs_NPS233-2
Glyma.17G057800	RecName: Full=Calcium-transporting ATPase 8, plasma membrane-type; EC=3.6.3.8; AltName: Full=Ca(2+)-ATPase isoform 8;	-4.18614	5.52363e-08	3.54443e-06	down	NPS233-1_vs_NPS233-2
Glyma.13G248600	RecName: Full=Uncharacterized protein At1g08160;	-4.17809	0.000430077	0.00681903	down	NPS233-1_vs_NPS233-2
Glyma.10G159600	RecName: Full=Benzyl alcohol O-benzoyltransferase; EC=2.3.1.196; AltName: Full=Benzoyl coenzyme A:benzyl alcohol benzoyl transferase;	-4.17669	0.000301463	0.00514381	down	NPS233-1_vs_NPS233-2
Glyma.02G031600	RecName: Full=Protein ALTERED XYLOGLUCAN 4; AltName: Full=Protein trichome birefringence-like 27;	-4.16766	6.83512e-05	0.00151597	down	NPS233-1_vs_NPS233-2
Glyma.06G183900	RecName: Full=Aldehyde dehydrogenase family 2 member B4, mitochondrial; Short=ALDH2a; EC=1.2.1.3; Flags: Precursor;	-4.14853	9.55243e-06	0.000301668	down	NPS233-1_vs_NPS233-2
Glyma.20G115600	RecName: Full=Zinc finger protein CONSTANS-LIKE 6;	-4.12466	0.00212123	0.0243323	down	NPS233-1_vs_NPS233-2
Glyma.19G105100	RecName: Full=Chalcone synthase; EC=2.3.1.74; AltName: Full=Naringenin-chalcone synthase;	-4.11498	3.31812e-05	0.000845956	down	NPS233-1_vs_NPS233-2
Glyma.13G238100	RecName: Full=VQ motif-containing protein 4 {ECO:0000303|PubMed:22535423}; Short=AtVQ4 {ECO:0000303|PubMed:22535423}; AltName: Full=MPK3/6-targeted VQ-motif-containing protein 1 {ECO:0000303|PubMed:24750137};	-4.11475	2.96846e-06	0.000111804	down	NPS233-1_vs_NPS233-2
Glyma.04G057800	RecName: Full=3-ketoacyl-CoA synthase 10 {ECO:0000303|PubMed:18465198}; Short=KCS-10 {ECO:0000303|PubMed:18465198}; EC=2.3.1.199 {ECO:0000305}; AltName: Full=Protein FIDDLEHEAD {ECO:0000303|PubMed:10559443}; AltName: Full=Very long-chain fatty acid condensing enzyme 10 {ECO:0000303|PubMed:18465198}; Short=VLCFA condensing enzyme 10 {ECO:0000303|PubMed:18465198};	-4.1124	1.24971e-10	1.49265e-08	down	NPS233-1_vs_NPS233-2
Glyma.03G190200	RecName: Full=Glucomannan 4-beta-mannosyltransferase 9; EC=2.4.1.32; AltName: Full=Cellulose synthase-like protein A9; Short=AtCslA9; AltName: Full=Glucomannan synthase; AltName: Full=Mannan synthase 9; AltName: Full=Protein RESISTANT TO AGROBACTERIUM TRANSFORMATION 4;	-4.11037	1.09921e-05	0.000338205	down	NPS233-1_vs_NPS233-2
Glyma.01G078800	RecName: Full=Putative lipid-binding protein At4g00165; Flags: Precursor;	-4.11027	5.80158e-05	0.00133698	down	NPS233-1_vs_NPS233-2
Glyma.06G143300	RecName: Full=Expansin-A8; Short=AtEXPA8; AltName: Full=Alpha-expansin-8; Short=At-EXP8; Short=AtEx8; AltName: Full=Ath-ExpAlpha-1.11; Flags: Precursor;	-4.09827	2.32797e-14	5.25437e-12	down	NPS233-1_vs_NPS233-2
Glyma.17G251700	RecName: Full=F-box protein PP2-B10; AltName: Full=Protein PHLOEM PROTEIN 2-LIKE B10; Short=AtPP2-B10;	-4.09776	0.00318367	0.0332291	down	NPS233-1_vs_NPS233-2
Glyma.14G216100	RecName: Full=Proline-rich receptor-like protein kinase PERK13; EC=2.7.11.1; AltName: Full=Proline-rich extensin-like receptor kinase 13; Short=AtPERK13; AltName: Full=Protein ROOT HAIR SPECIFIC 10;	-4.09743	0.00037272	0.00611166	down	NPS233-1_vs_NPS233-2
Glyma.07G050300	RecName: Full=Endonuclease 2; Short=AtENDO2; EC=3.1.30.1; AltName: Full=Deoxyribonuclease ENDO2; AltName: Full=Single-stranded-nucleate endonuclease ENDO2; Flags: Precursor;	-4.09356	1.96131e-09	1.85245e-07	down	NPS233-1_vs_NPS233-2
Glyma.19G255800	RecName: Full=Cytochrome b561 and DOMON domain-containing protein At3g61750; AltName: Full=Protein b561A.tha9; Flags: Precursor;	-4.09037	6.10864e-06	0.00020651	down	NPS233-1_vs_NPS233-2
Glyma.13G161900	RecName: Full=Bifunctional purple acid phosphatase 26; Includes: RecName: Full=Acid phosphatase; EC=3.1.3.2; Includes: RecName: Full=Peroxidase; EC=1.11.1.7; Flags: Precursor;	-4.08627	1.58763e-15	4.43036e-13	down	NPS233-1_vs_NPS233-2
Glyma.12G113500	--	-4.08449	0.00354195	0.0359898	down	NPS233-1_vs_NPS233-2
Glyma.02G179200	RecName: Full=Amino acid transporter AVT1A {ECO:0000305}; Short=AtAvt1A {ECO:0000303|PubMed:27925655};	-4.08169	3.32031e-08	2.27515e-06	down	NPS233-1_vs_NPS233-2
Glyma.02G149900	--	-4.07265	0.000381317	0.00621273	down	NPS233-1_vs_NPS233-2
Glyma.20G129300	RecName: Full=Probable carbohydrate esterase At4g34215; EC=3.1.-.-;	-4.07071	3.01394e-08	2.09312e-06	down	NPS233-1_vs_NPS233-2
Glyma.10G164400	--	-4.06893	0.000700917	0.0100598	down	NPS233-1_vs_NPS233-2
Glyma.09G052700	RecName: Full=Potassium transporter 11; Short=AtPOT11;	-4.06695	2.0678e-07	1.13548e-05	down	NPS233-1_vs_NPS233-2
Glyma.03G189800	RecName: Full=Leucine-rich repeat receptor-like protein kinase PXC1 {ECO:0000305}; AltName: Full=Protein PXY/TDR-CORRELATED 1 {ECO:0000303|PubMed:23815750}; Flags: Precursor;	-4.05914	4.6745e-08	3.0991e-06	down	NPS233-1_vs_NPS233-2
Glyma.14G031300	RecName: Full=BTB/POZ domain and ankyrin repeat-containing protein NPR2 {ECO:0000305}; Short=OsNPR2 {ECO:0000303|PubMed:17309686}; AltName: Full=NPR1 homolog 2 {ECO:0000305}; Short=OsNH2 {ECO:0000303|PubMed:15986920};	-4.05393	0.001489	0.0183855	down	NPS233-1_vs_NPS233-2
Glyma.17G219500	--	-4.05371	7.59757e-16	2.20014e-13	down	NPS233-1_vs_NPS233-2
Glyma.07G006500	RecName: Full=Probable sulfate transporter 3.4;	-4.04771	0.00239249	0.0266667	down	NPS233-1_vs_NPS233-2
Glyma.12G178800	RecName: Full=Superoxide dismutase [Cu-Zn], chloroplastic; EC=1.15.1.1; Flags: Precursor;	-4.04269	7.07871e-08	4.41643e-06	down	NPS233-1_vs_NPS233-2
Glyma.08G110000	RecName: Full=Protein ECERIFERUM 26; AltName: Full=CER2-like protein 1; Short=CER2-like1;	-4.04046	5.85074e-06	0.000199328	down	NPS233-1_vs_NPS233-2
Glyma.16G078200	RecName: Full=Senescence/dehydration-associated protein At4g35985, chloroplastic {ECO:0000305}; Flags: Precursor;	-4.03813	0.0034981	0.0356737	down	NPS233-1_vs_NPS233-2
Glyma.17G113500	RecName: Full=Equilibrative nucleotide transporter 8; Short=AtENT8; AltName: Full=Nucleoside transporter ENT8;	-4.02863	9.47659e-05	0.00198699	down	NPS233-1_vs_NPS233-2
Glyma.04G065600	RecName: Full=pEARLI1-like lipid transfer protein 1; AltName: Full=Protein AZELAIC ACID INDUCED 1; Flags: Precursor;	-4.02734	1.33304e-07	7.73514e-06	down	NPS233-1_vs_NPS233-2
Glyma.12G188800	RecName: Full=BEL1-like homeodomain protein 1; Short=BEL1-like protein 1; AltName: Full=Protein EMBRYO SAC DEVELOPMENT ARREST 29;	-4.02351	0.00394067	0.0390833	down	NPS233-1_vs_NPS233-2
Glyma.15G024800	RecName: Full=Disease resistance-like protein DSC1 {ECO:0000305}; AltName: Full=Protein DOMINANT SUPPRESSOR OF CAMTA3 NUMBER 1 {ECO:0000303|PubMed:28407487};	-4.01903	0.00195295	0.0228192	down	NPS233-1_vs_NPS233-2
Glyma.13G260000	--	-4.01477	9.91478e-13	1.80085e-10	down	NPS233-1_vs_NPS233-2
Glyma.01G149300	RecName: Full=Probable methyltransferase PMT20; EC=2.1.1.-;	-4.01443	4.53546e-19	2.07792e-16	down	NPS233-1_vs_NPS233-2
Glyma.07G018000	RecName: Full=Aquaporin TIP2-1; AltName: Full=Delta-tonoplast intrinsic protein; Short=Delta-TIP; AltName: Full=Tonoplast intrinsic protein 2-1; Short=AtTIP2;1; Contains: RecName: Full=Aquaporin TIP2-1, N-terminally processed;	-4.01385	0.000145205	0.00279449	down	NPS233-1_vs_NPS233-2
Glyma.01G231800	--	-4.00993	0.00151881	0.018671	down	NPS233-1_vs_NPS233-2
Glyma.15G118500	RecName: Full=Heavy metal-associated isoprenylated plant protein 7 {ECO:0000303|PubMed:21072340, ECO:0000303|PubMed:23368984}; Short=AtHIP07 {ECO:0000303|PubMed:21072340, ECO:0000303|PubMed:23368984}; AltName: Full=Farnesylated protein 3 {ECO:0000303|PubMed:8837031}; Short=AtFP3 {ECO:0000303|PubMed:8837031}; Flags: Precursor;	-4.00721	7.65468e-08	4.74683e-06	down	NPS233-1_vs_NPS233-2
Glyma.13G087100	RecName: Full=Low affinity sulfate transporter 3;	-4.00511	0.00289112	0.0309812	down	NPS233-1_vs_NPS233-2
Glyma.11G014300	--	-4.00332	0.00220083	0.0249932	down	NPS233-1_vs_NPS233-2
Glyma.04G185000	--	-4.0032	1.22812e-05	0.00036959	down	NPS233-1_vs_NPS233-2
Glyma.11G188300	RecName: Full=Stress-response A/B barrel domain-containing protein At5g22580 {ECO:0000305}; AltName: Full=Uncharacterized protein At5g22580;	-4.00255	3.42692e-11	4.53417e-09	down	NPS233-1_vs_NPS233-2
Glyma.07G211100	RecName: Full=Probable carboxylesterase 2; AltName: Full=AtCXE2; EC=3.1.1.1;	-3.99963	2.63415e-08	1.8588e-06	down	NPS233-1_vs_NPS233-2
Glyma.17G172900	RecName: Full=NDR1/HIN1-like protein 13 {ECO:0000303|PubMed:26206852};	-3.99916	3.57125e-06	0.0001316	down	NPS233-1_vs_NPS233-2
Glyma.16G031600	RecName: Full=Probable disease resistance protein At4g27220;	-3.99769	0.00202229	0.023425	down	NPS233-1_vs_NPS233-2
Glyma.15G156400	RecName: Full=Vacuolar-sorting receptor 6; Short=AtVSR6; AltName: Full=BP80-like protein d; Short=AtBP80d; AltName: Full=Epidermal growth factor receptor-like protein 6; Short=AtELP6; Flags: Precursor;	-3.99571	0.000398931	0.00643827	down	NPS233-1_vs_NPS233-2
Glyma.07G054000	RecName: Full=Transcription factor MYB111 {ECO:0000303|PubMed:11597504}; AltName: Full=Myb-related protein 111 {ECO:0000303|PubMed:11597504}; Short=AtMYB111 {ECO:0000303|PubMed:11597504}; AltName: Full=Protein PRODUCTION OF FLAVONOL GLYCOSIDES 3 {ECO:0000303|PubMed:17419845};	-3.99411	0.00322814	0.0334993	down	NPS233-1_vs_NPS233-2
Glyma.02G234200	RecName: Full=Peroxidase 4 {ECO:0000250|UniProtKB:Q42578}; EC=1.11.1.7; Flags: Precursor;	-3.99145	0.00510394	0.0475044	down	NPS233-1_vs_NPS233-2
Glyma.04G191100	RecName: Full=Probable pectate lyase 22; EC=4.2.2.2; Flags: Precursor;	-3.98982	7.18784e-07	3.39449e-05	down	NPS233-1_vs_NPS233-2
Glyma.11G143100	RecName: Full=Aquaporin TIP1-3; AltName: Full=Gamma-tonoplast intrinsic protein 3; Short=Gamma-TIP3; AltName: Full=Tonoplast intrinsic protein 1-3; Short=AtTIP1;3;	-3.98587	0.003542	0.0359898	down	NPS233-1_vs_NPS233-2
Glyma.15G005100	RecName: Full=Transcription factor bHLH25; AltName: Full=Basic helix-loop-helix protein 25; Short=AtbHLH25; Short=bHLH 25; AltName: Full=Transcription factor EN 29; AltName: Full=bHLH transcription factor bHLH025;	-3.98298	0.00423039	0.0411067	down	NPS233-1_vs_NPS233-2
Glyma.12G032800	RecName: Full=Ubiquitin-conjugating enzyme E2 10; EC=2.3.2.23; AltName: Full=E2 ubiquitin-conjugating enzyme 10; AltName: Full=Ubiquitin carrier protein 10/12; AltName: Full=Ubiquitin-conjugating enzyme E2-17 kDa 10/12; AltName: Full=Ubiquitin-protein ligase 10/12;	-3.98185	6.55454e-05	0.00147182	down	NPS233-1_vs_NPS233-2
Glyma.13G334500	RecName: Full=UDP-glucuronic acid decarboxylase 5; EC=4.1.1.35; AltName: Full=UDP-XYL synthase 5; AltName: Full=UDP-glucuronate decarboxylase 5; Short=UGD; Short=UXS-5;	-3.97703	8.35261e-07	3.82495e-05	down	NPS233-1_vs_NPS233-2
Glyma.15G213700	RecName: Full=G-type lectin S-receptor-like serine/threonine-protein kinase At1g67520; EC=2.7.11.1; Flags: Precursor;	-3.97139	0.00330621	0.0341594	down	NPS233-1_vs_NPS233-2
Glyma.08G291000	RecName: Full=Cyclin-D1-1; AltName: Full=Cyclin-delta-1; Short=Cyclin-d1; AltName: Full=G1/S-specific cyclin-D1-1; Short=CycD1;1;	-3.96829	1.08129e-07	6.39522e-06	down	NPS233-1_vs_NPS233-2
Glyma.02G127600	--	-3.96667	0.000362558	0.00597054	down	NPS233-1_vs_NPS233-2
Glyma.15G256900	RecName: Full=Elongation factor 2; Short=EF-2;	-3.96205	0.000490208	0.00755014	down	NPS233-1_vs_NPS233-2
Glyma.06G165700	RecName: Full=Transcription factor bHLH137; AltName: Full=Basic helix-loop-helix protein 137; Short=AtbHLH137; Short=bHLH 137; AltName: Full=Transcription factor EN 89; AltName: Full=bHLH transcription factor bHLH137;	-3.96008	1.61633e-05	0.000465868	down	NPS233-1_vs_NPS233-2
Glyma.18G260900	RecName: Full=Expansin-A1; Short=AtEXPA1; AltName: Full=Alpha-expansin-1; Short=At-EXP1; Short=AtEx1; AltName: Full=Ath-ExpAlpha-1.2; Flags: Precursor;	-3.95813	8.28893e-07	3.81465e-05	down	NPS233-1_vs_NPS233-2
Glyma.11G119200	--	-3.95389	0.00492248	0.0462081	down	NPS233-1_vs_NPS233-2
Glyma.15G091900	RecName: Full=BAG family molecular chaperone regulator 2; AltName: Full=Bcl-2-associated athanogene 2;	-3.94994	2.80342e-09	2.49431e-07	down	NPS233-1_vs_NPS233-2
Glyma.01G033700	RecName: Full=WAT1-related protein At5g40210;	-3.94992	5.622e-05	0.00130539	down	NPS233-1_vs_NPS233-2
Glyma.03G170300	RecName: Full=Transcription factor PIF1; AltName: Full=Basic helix-loop-helix protein 15; Short=AtbHLH15; Short=bHLH 15; AltName: Full=Protein PHY-INTERACTING FACTOR 1; AltName: Full=Protein PHYTOCHROME INTERACTING FACTOR 3-LIKE 5; AltName: Full=Transcription factor EN 101; AltName: Full=bHLH transcription factor bHLH015;	-3.94867	1.93161e-05	0.000537859	down	NPS233-1_vs_NPS233-2
Glyma.06G307100	RecName: Full=L-ascorbate oxidase homolog; EC=1.10.3.-; Flags: Precursor;	-3.93221	2.32405e-06	9.20505e-05	down	NPS233-1_vs_NPS233-2
Glyma.09G033500	--	-3.91367	0.00127653	0.0162321	down	NPS233-1_vs_NPS233-2
Glyma.01G178700	RecName: Full=Probable galacturonosyltransferase-like 2; EC=2.4.1.-;	-3.91341	9.85687e-05	0.00204437	down	NPS233-1_vs_NPS233-2
Glyma.15G152500	RecName: Full=Probable protein phosphatase 2C 48; Short=OsPP2C48; EC=3.1.3.16;	-3.9079	2.78321e-06	0.000106393	down	NPS233-1_vs_NPS233-2
Glyma.11G071300	RecName: Full=Mannan endo-1,4-beta-mannosidase 7; EC=3.2.1.78; AltName: Full=Beta-mannanase 7; AltName: Full=Endo-beta-1,4-mannanase 7; Short=AtMAN7; Flags: Precursor;	-3.90259	1.40811e-05	0.000412675	down	NPS233-1_vs_NPS233-2
Glyma.17G226000	--	-3.90219	0.0041598	0.0406032	down	NPS233-1_vs_NPS233-2
Glyma.11G097000	RecName: Full=Lysine histidine transporter-like 8; AltName: Full=Amino acid transporter-like protein 1;	-3.89804	0.000486006	0.00750047	down	NPS233-1_vs_NPS233-2
Glyma.19G039100	RecName: Full=Protein NSP-INTERACTING KINASE 1 {ECO:0000303|PubMed:15489295}; Short=AtNIK1 {ECO:0000303|PubMed:15489295}; EC=2.7.11.1 {ECO:0000269|PubMed:15489295}; AltName: Full=LRR receptor-like serine/threonine-protein kinase NIK1 {ECO:0000303|PubMed:15489295}; Flags: Precursor;	-3.89233	3.53126e-05	0.000892344	down	NPS233-1_vs_NPS233-2
Glyma.16G040100	RecName: Full=Tubulin alpha-6 chain; AltName: Full=Alpha-6-tubulin;	-3.89056	3.84818e-12	6.02673e-10	down	NPS233-1_vs_NPS233-2
Glyma.16G112200	RecName: Full=RING-H2 finger protein ATL8; EC=2.3.2.27 {ECO:0000305}; AltName: Full=RING-type E3 ubiquitin transferase ATL8 {ECO:0000305};	-3.88845	0.00128786	0.0163423	down	NPS233-1_vs_NPS233-2
Glyma.04G027800	RecName: Full=Protein WALLS ARE THIN 1;	-3.87998	1.22773e-08	9.51677e-07	down	NPS233-1_vs_NPS233-2
Glyma.14G111400	--	-3.8766	0.00311251	0.032675	down	NPS233-1_vs_NPS233-2
Glyma.18G094300	--	-3.87596	9.6192e-09	7.61008e-07	down	NPS233-1_vs_NPS233-2
Glyma.13G177400	RecName: Full=Squamosa promoter-binding protein 1;	-3.87067	9.82834e-05	0.00203983	down	NPS233-1_vs_NPS233-2
Glyma.08G072200	RecName: Full=Alternative oxidase 3, mitochondrial; EC=1.10.3.11; Flags: Precursor;	-3.86015	3.16023e-06	0.000117869	down	NPS233-1_vs_NPS233-2
Glyma.11G034000	RecName: Full=Probable aquaporin TIP2-2; AltName: Full=Tonoplast intrinsic protein 2-2; Short=AtTIP2;2;	-3.859	1.43384e-09	1.41522e-07	down	NPS233-1_vs_NPS233-2
Glyma.15G176300	RecName: Full=Protein ELF4-LIKE 3;	-3.8551	5.46095e-05	0.00127572	down	NPS233-1_vs_NPS233-2
Glyma.17G236800	RecName: Full=Subtilisin-like protease SBT1.7 {ECO:0000303|PubMed:16193095}; EC=3.4.21.- {ECO:0000305}; AltName: Full=Cucumisin-like serine protease; AltName: Full=Subtilase subfamily 1 member 7 {ECO:0000303|PubMed:16193095}; Short=AtSBT1.7 {ECO:0000303|PubMed:16193095}; AltName: Full=Subtilisin-like serine protease 1 {ECO:0000303|PubMed:12702015}; Short=At-SLP1 {ECO:0000303|PubMed:12702015}; Fla…	-3.8427	2.35795e-05	0.000636025	down	NPS233-1_vs_NPS233-2
Glyma.08G203800	RecName: Full=Probable inactive nicotinamidase At3g16190 {ECO:0000305};	-3.84057	0.00107309	0.0140468	down	NPS233-1_vs_NPS233-2
Glyma.13G224900	RecName: Full=Aquaporin NIP1-2; AltName: Full=NOD26-like intrinsic protein 1-2; Short=AtNIP1;2; AltName: Full=Nodulin-26-like major intrinsic protein 2; Short=NodLikeMip2; Short=Protein NLM2;	-3.84043	3.26131e-09	2.81998e-07	down	NPS233-1_vs_NPS233-2
Glyma.02G202500	RecName: Full=NADP-dependent glyceraldehyde-3-phosphate dehydrogenase; EC=1.2.1.9; AltName: Full=Glyceraldehyde-3-phosphate dehydrogenase [NADP(+)]; AltName: Full=Non-phosphorylating glyceraldehyde 3-phosphate dehydrogenase; AltName: Full=Triosephosphate dehydrogenase;	-3.83208	9.19916e-07	4.11629e-05	down	NPS233-1_vs_NPS233-2
Glyma.13G149100	RecName: Full=Sulfite exporter TauE/SafE family protein 4 {ECO:0000312|EMBL:AEC09275.1};	-3.83169	2.84393e-05	0.000746131	down	NPS233-1_vs_NPS233-2
Glyma.11G111800	RecName: Full=Subtilisin-like protease SBT3.6 {ECO:0000303|PubMed:16193095}; EC=3.4.21.- {ECO:0000255|PROSITE-ProRule:PRU10082}; AltName: Full=Subtilase subfamily 3 member 6 {ECO:0000303|PubMed:16193095}; Short=AtSBT3.6 {ECO:0000303|PubMed:16193095}; Flags: Precursor;	-3.83106	0.000454515	0.00713647	down	NPS233-1_vs_NPS233-2
Glyma.10G072700	--	-3.82596	3.85072e-13	7.43407e-11	down	NPS233-1_vs_NPS233-2
Glyma.11G219400	RecName: Full=Expansin-A3; Short=AtEXPA3; AltName: Full=Alpha-expansin-3; Short=At-EXP3; Short=AtEx3; AltName: Full=Ath-ExpAlpha-1.9; Flags: Precursor;	-3.81952	0.000190302	0.00351264	down	NPS233-1_vs_NPS233-2
Glyma.17G126500	RecName: Full=Probable pectate lyase 22; EC=4.2.2.2; Flags: Precursor;	-3.81909	2.54336e-09	2.2962e-07	down	NPS233-1_vs_NPS233-2
Glyma.16G149300	RecName: Full=Cytochrome P450 81E8 {ECO:0000303|PubMed:14617078}; EC=1.14.13.- {ECO:0000305};	-3.81672	3.15056e-05	0.000810642	down	NPS233-1_vs_NPS233-2
Glyma.16G025400	RecName: Full=Putative cyclic nucleotide-gated ion channel 13; AltName: Full=Cyclic nucleotide- and calmodulin-regulated ion channel 13;	-3.81669	0.00341716	0.0349969	down	NPS233-1_vs_NPS233-2
Glyma.04G196400	RecName: Full=Protein NUCLEAR FUSION DEFECTIVE 4 {ECO:0000303|PubMed:16698901};	-3.81046	0.000402589	0.00648183	down	NPS233-1_vs_NPS233-2
Glyma.19G228300	RecName: Full=Homeobox protein knotted-1-like 1; AltName: Full=Homeobox protein HOS16; AltName: Full=Homeobox protein OSH6;	-3.80558	0.000104678	0.00213076	down	NPS233-1_vs_NPS233-2
Glyma.13G274800	RecName: Full=Probable protein phosphatase 2C 39; Short=AtPP2C39; EC=3.1.3.16;	-3.80116	2.92372e-06	0.000110619	down	NPS233-1_vs_NPS233-2
Glyma.14G070500	RecName: Full=Thioredoxin H-type; Short=Trx-H;	-3.78921	2.65203e-19	1.29217e-16	down	NPS233-1_vs_NPS233-2
Glyma.05G169900	RecName: Full=Basic blue protein; AltName: Full=CBP; AltName: Full=Cusacyanin; AltName: Full=Plantacyanin;	-3.78763	4.13034e-10	4.52803e-08	down	NPS233-1_vs_NPS233-2
Glyma.11G200300	RecName: Full=Probable LRR receptor-like serine/threonine-protein kinase At1g06840; EC=2.7.11.1; Flags: Precursor;	-3.7795	6.35325e-06	0.000213369	down	NPS233-1_vs_NPS233-2
Glyma.14G175000	RecName: Full=7-deoxyloganetin glucosyltransferase; EC=2.4.1.324; AltName: Full=Genipin glucosyltransferase; AltName: Full=UDP-glucose glucosyltransferase 2; Short=GjUGT2; AltName: Full=UDP-glycosyltransferase 85A24;	-3.7789	0.000138508	0.00270233	down	NPS233-1_vs_NPS233-2
Glyma.12G089100	RecName: Full=Myb-related protein 2 {ECO:0000303|PubMed:21255164}; AltName: Full=Myb family transcription factor PHL9 {ECO:0000305}; AltName: Full=Protein NITROGEN STARVATION RESPONSE 1 {ECO:0000303|PubMed:15592750}; Short=AtNSR1 {ECO:0000303|PubMed:15592750}; AltName: Full=Protein PHR1-LIKE 9 {ECO:0000305};	-3.7776	0.00275787	0.029956	down	NPS233-1_vs_NPS233-2
Glyma.03G023700	RecName: Full=Probable leucine-rich repeat receptor-like protein kinase At1g35710; EC=2.7.11.1; Flags: Precursor;	-3.77351	0.000588291	0.00874911	down	NPS233-1_vs_NPS233-2
Glyma.02G311900	--	-3.7715	8.53995e-08	5.21827e-06	down	NPS233-1_vs_NPS233-2
Glyma.13G347800	RecName: Full=Linoleate 9S-lipoxygenase-4; EC=1.13.11.58; AltName: Full=Lipoxygenase-4; Short=L-4; AltName: Full=VSP94;	-3.76437	1.10383e-20	6.77666e-18	down	NPS233-1_vs_NPS233-2
Glyma.11G087500	RecName: Full=MLO-like protein 8; Short=AtMlo8;	-3.76134	2.13559e-08	1.56828e-06	down	NPS233-1_vs_NPS233-2
Glyma.18G043600	RecName: Full=Glutamate decarboxylase 4; Short=GAD 4; EC=4.1.1.15;	-3.76088	1.30562e-13	2.63666e-11	down	NPS233-1_vs_NPS233-2
Glyma.03G078700	RecName: Full=Probable aquaporin PIP1-4; AltName: Full=Plasma membrane intrinsic protein 1-4; Short=AtPIP1;4; AltName: Full=Transmembrane protein C; Short=TMP-C;	-3.74351	5.95013e-16	1.73948e-13	down	NPS233-1_vs_NPS233-2
Glyma.01G021000	RecName: Full=Probable mannitol dehydrogenase; EC=1.1.1.255; AltName: Full=NAD-dependent mannitol dehydrogenase;	-3.72632	8.3219e-07	3.82409e-05	down	NPS233-1_vs_NPS233-2
Glyma.06G042400	RecName: Full=Kinesin-like protein KIN-4A {ECO:0000305}; AltName: Full=GhKINESIN-4A {ECO:0000303|PubMed:25600279};	-3.71414	3.58974e-05	0.000902462	down	NPS233-1_vs_NPS233-2
Glyma.13G095600	RecName: Full=4-coumarate--CoA ligase 1; Short=4CL 1; EC=6.2.1.12; AltName: Full=4-coumaroyl-CoA synthase 1;	-3.70478	3.10852e-05	0.000801841	down	NPS233-1_vs_NPS233-2
Glyma.06G128100	RecName: Full=Protein DMR6-LIKE OXYGENASE 1 {ECO:0000303|PubMed:25376907}; EC=1.14.11.- {ECO:0000255|PROSITE-ProRule:PRU00805}; AltName: Full=2-oxoglutarate (2OG)-Fe(II) oxygenase-like protein DLO1 {ECO:0000303|PubMed:25376907}; AltName: Full=Protein SENESCENCE-ASSOCIATED GENE 108 {ECO:0000303|PubMed:23959884}; AltName: Full=Salicylate 3-hydroxylase DLO1 {ECO:0000303|PubMed:23959884}; Short=S3H D…	-3.70285	0.00284624	0.0306663	down	NPS233-1_vs_NPS233-2
Glyma.07G201100	RecName: Full=Protein E6;	-3.70205	7.23657e-09	5.9394e-07	down	NPS233-1_vs_NPS233-2
Glyma.15G157100	RecName: Full=Cellulose synthase A catalytic subunit 4 [UDP-forming]; Short=AtCesA4; EC=2.4.1.12; AltName: Full=Protein IRREGULAR XYLEM 5; Short=AtIRX5;	-3.70118	0.000645254	0.00941207	down	NPS233-1_vs_NPS233-2
Glyma.U035700	RecName: Full=TMV resistance protein N;	-3.70022	0.000117814	0.00234376	down	NPS233-1_vs_NPS233-2
novel.1146	--	-3.69851	7.90369e-07	3.65379e-05	down	NPS233-1_vs_NPS233-2
Glyma.13G181900	RecName: Full=Cytochrome P450 71A26; EC=1.14.-.-;	-3.69371	5.03237e-05	0.00118917	down	NPS233-1_vs_NPS233-2
Glyma.14G206100	RecName: Full=Root phototropism protein 2; AltName: Full=BTB/POZ domain-containing protein RPT2;	-3.68692	0.00170185	0.0203982	down	NPS233-1_vs_NPS233-2
Glyma.08G357400	RecName: Full=LRR receptor-like serine/threonine-protein kinase RCH1; EC=2.7.11.1; AltName: Full=Protein ROOT CLAVATA-HOMOLOG1 1; Flags: Precursor;	-3.67601	0.00215495	0.0245996	down	NPS233-1_vs_NPS233-2
Glyma.07G109600	RecName: Full=Squamosa promoter-binding-like protein 8;	-3.66854	9.28341e-05	0.00195582	down	NPS233-1_vs_NPS233-2
Glyma.12G010100	RecName: Full=Serine carboxypeptidase-like 40; EC=3.4.16.-; Flags: Precursor;	-3.66537	3.74525e-10	4.12058e-08	down	NPS233-1_vs_NPS233-2
Glyma.13G249800	RecName: Full=Transcription factor bHLH112; AltName: Full=Basic helix-loop-helix protein 112; Short=AtbHLH112; Short=bHLH 112; AltName: Full=Transcription factor EN 64; AltName: Full=bHLH transcription factor bHLH112;	-3.66394	0.00424827	0.0412654	down	NPS233-1_vs_NPS233-2
Glyma.01G157300	RecName: Full=Monosaccharide-sensing protein 3; AltName: Full=Sugar transporter MSSP3;	-3.65512	6.14279e-05	0.00139777	down	NPS233-1_vs_NPS233-2
Glyma.08G003100	RecName: Full=Fatty acid amide hydrolase; EC=3.5.1.99; AltName: Full=N-acylethanolamine amidohydrolase;	-3.65042	0.000548206	0.00824888	down	NPS233-1_vs_NPS233-2
Glyma.07G234400	--	-3.64142	0.00437131	0.0421955	down	NPS233-1_vs_NPS233-2
Glyma.18G003100	RecName: Full=Crocetin glucosyltransferase, chloroplastic; EC=2.4.1.271; AltName: Full=UDP-glucose glucosyltransferase 1; Short=GjUGT1; AltName: Full=UDP-glycosyltransferase 75L6; Flags: Precursor;	-3.64054	8.76093e-05	0.00186754	down	NPS233-1_vs_NPS233-2
Glyma.19G106700	RecName: Full=Xyloglucan endotransglucosylase/hydrolase 1 {ECO:0000305}; EC=2.4.1.207 {ECO:0000250|UniProtKB:Q38857}; Flags: Precursor;	-3.64043	4.37282e-05	0.00105525	down	NPS233-1_vs_NPS233-2
Glyma.18G247000	RecName: Full=UDP-glycosyltransferase 74G1 {ECO:0000303|PubMed:15610349}; EC=2.4.1.- {ECO:0000305};	-3.62981	2.81552e-05	0.000741847	down	NPS233-1_vs_NPS233-2
Glyma.03G193200	RecName: Full=IQ domain-containing protein IQM3 {ECO:0000305}; AltName: Full=IQ motif-containing protein 3 {ECO:0000303|Ref.4};	-3.62937	0.0013306	0.0167531	down	NPS233-1_vs_NPS233-2
Glyma.18G090900	RecName: Full=Aspartyl protease family protein At5g10770; EC=3.4.23.- {ECO:0000305}; Flags: Precursor;	-3.6224	1.48849e-06	6.19116e-05	down	NPS233-1_vs_NPS233-2
Glyma.02G251800	RecName: Full=Protein DA1-related 2;	-3.62206	0.000669404	0.0096879	down	NPS233-1_vs_NPS233-2
Glyma.18G062600	--	-3.62058	7.79666e-06	0.000252454	down	NPS233-1_vs_NPS233-2
Glyma.11G098100	--	-3.61801	0.00173842	0.0207717	down	NPS233-1_vs_NPS233-2
Glyma.01G197500	RecName: Full=Tubulin alpha chain;	-3.61776	6.93047e-08	4.35046e-06	down	NPS233-1_vs_NPS233-2
Glyma.07G115500	RecName: Full=Patatin-like protein 1; Short=AtPLP1; EC=3.1.1.-; AltName: Full=Patatin-related phospholipase A IIgamma; Short=pPLAIIg; AltName: Full=Phospholipase A IVA; Short=AtPLAIVA;	-3.61581	1.05685e-06	4.64599e-05	down	NPS233-1_vs_NPS233-2
Glyma.17G163400	--	-3.5926	0.000765785	0.0107581	down	NPS233-1_vs_NPS233-2
Glyma.14G222000	RecName: Full=Calcium-dependent protein kinase 29; EC=2.7.11.1;	-3.59203	6.39888e-07	3.06906e-05	down	NPS233-1_vs_NPS233-2
Glyma.10G024000	--	-3.58988	0.000366417	0.00601794	down	NPS233-1_vs_NPS233-2
Glyma.08G288100	RecName: Full=Spermidine synthase 2; Short=SPDSY 2; EC=2.5.1.16; AltName: Full=Putrescine aminopropyltransferase 2;	-3.58532	7.15533e-09	5.9043e-07	down	NPS233-1_vs_NPS233-2
Glyma.09G102400	RecName: Full=MLP-like protein 34;	-3.58301	0.00110274	0.0143613	down	NPS233-1_vs_NPS233-2
Glyma.01G058500	RecName: Full=Probable ureide permease A3; AltName: Full=VuA3; Flags: Fragment;	-3.57846	5.93877e-07	2.8663e-05	down	NPS233-1_vs_NPS233-2
Glyma.16G049000	RecName: Full=Light-regulated protein 1, chloroplastic {ECO:0000303|PubMed:8932388}; AltName: Full=Protein CCR-LIKE, chloroplastic {ECO:0000303|PubMed:16055688}; Flags: Precursor;	-3.5721	1.70881e-09	1.64432e-07	down	NPS233-1_vs_NPS233-2
Glyma.03G074000	--	-3.56902	0.000293539	0.00502256	down	NPS233-1_vs_NPS233-2
Glyma.15G139600	RecName: Full=GDSL esterase/lipase At4g16230; EC=3.1.1.-; AltName: Full=Extracellular lipase At4g16230; Flags: Precursor;	-3.56449	0.00292233	0.0312231	down	NPS233-1_vs_NPS233-2
Glyma.07G023000	RecName: Full=Photosynthetic NDH subunit of subcomplex B 1, chloroplastic {ECO:0000303|PubMed:21785130}; Short=Protein PnsB1 {ECO:0000303|PubMed:21785130}; AltName: Full=NAD(P)H DEHYDROGENASE SUBUNIT 48 {ECO:0000303|PubMed:18974055}; AltName: Full=NDH-DEPENDENT CYCLIC ELECTRON FLOW 1 {ECO:0000303|PubMed:18785996}; Flags: Precursor;	-3.56005	1.49446e-05	0.000435237	down	NPS233-1_vs_NPS233-2
Glyma.17G163200	RecName: Full=Peroxidase 50; Short=Atperox P50; EC=1.11.1.7; AltName: Full=ATP9a; AltName: Full=PRXR2; Flags: Precursor;	-3.55666	2.46498e-09	2.232e-07	down	NPS233-1_vs_NPS233-2
Glyma.18G031300	RecName: Full=Proline transporter 1; Short=AtPROT1;	-3.54922	2.89253e-05	0.000755979	down	NPS233-1_vs_NPS233-2
Glyma.11G152400	RecName: Full=NADPH:quinone oxidoreductase; EC=1.6.5.2;	-3.54542	1.04748e-05	0.00032492	down	NPS233-1_vs_NPS233-2
Glyma.01G165400	RecName: Full=Thaumatin-like protein 1 {ECO:0000303|PubMed:15988566}; Short=AtTLP1 {ECO:0000303|PubMed:15988566}; Flags: Precursor;	-3.54537	7.75515e-09	6.29767e-07	down	NPS233-1_vs_NPS233-2
Glyma.06G238100	RecName: Full=Squamosa promoter-binding-like protein 4;	-3.54405	3.93767e-05	0.000971629	down	NPS233-1_vs_NPS233-2
Glyma.09G147500	--	-3.54142	0.00194071	0.0227027	down	NPS233-1_vs_NPS233-2
Glyma.13G361900	RecName: Full=Pleiotropic drug resistance protein 1; AltName: Full=NtPDR1;	-3.54009	0.00180953	0.0214541	down	NPS233-1_vs_NPS233-2
Glyma.16G040400	--	-3.53949	3.62566e-07	1.86109e-05	down	NPS233-1_vs_NPS233-2
Glyma.08G032100	RecName: Full=Leucine-rich repeat extensin-like protein 6; Short=AtLRX6; Short=LRR/EXTENSIN6; AltName: Full=Cell wall hydroxyproline-rich glycoprotein; Flags: Precursor;	-3.53516	0.00237743	0.0265331	down	NPS233-1_vs_NPS233-2
Glyma.13G087800	RecName: Full=Metal-independent phosphoserine phosphatase; Short=iPSP; EC=3.1.3.3 {ECO:0000269|PubMed:22337887}; AltName: Full=Phosphoglycerate mutase-like protein 3 {ECO:0000305};	-3.53487	3.70061e-06	0.00013507	down	NPS233-1_vs_NPS233-2
Glyma.18G017700	--	-3.53206	4.86096e-08	3.21577e-06	down	NPS233-1_vs_NPS233-2
Glyma.13G355100	--	-3.53006	0.00255605	0.0281423	down	NPS233-1_vs_NPS233-2
Glyma.02G262100	RecName: Full=Protein trichome birefringence-like 33;	-3.5233	0.00104464	0.0137322	down	NPS233-1_vs_NPS233-2
Glyma.18G245400	--	-3.51327	1.1479e-06	5.01223e-05	down	NPS233-1_vs_NPS233-2
Glyma.01G192500	RecName: Full=Peroxidase 51; Short=Atperox P51; EC=1.11.1.7; AltName: Full=ATP37; Flags: Precursor;	-3.50889	2.04615e-05	0.000563307	down	NPS233-1_vs_NPS233-2
Glyma.02G026600	RecName: Full=TORTIFOLIA1-like protein 4 {ECO:0000303|PubMed:15324671};	-3.50836	0.000100511	0.00207205	down	NPS233-1_vs_NPS233-2
Glyma.08G286800	RecName: Full=2-methylene-furan-3-one reductase; EC=1.3.1.105 {ECO:0000269|PubMed:16517758}; AltName: Full=Enone oxidoreductase; Short=SlEO; Flags: Precursor;	-3.50495	5.79208e-05	0.00133579	down	NPS233-1_vs_NPS233-2
Glyma.17G048900	RecName: Full=Serine/threonine-protein kinase RIPK {ECO:0000305}; EC=2.7.11.1 {ECO:0000305|PubMed:21320696}; AltName: Full=ACIK1A/PBL14; AltName: Full=ACRE protein ortholog 264A {ECO:0000305}; Short=AtACRE264a {ECO:0000303|PubMed:15181213}; AltName: Full=PBS1-like protein 14 {ECO:0000303|PubMed:20413097}; AltName: Full=RPM1-induced protein kinase {ECO:0000303|PubMed:21320696};	-3.50274	0.00533007	0.049083	down	NPS233-1_vs_NPS233-2
Glyma.12G097700	RecName: Full=L-ascorbate oxidase homolog; EC=1.10.3.-; Flags: Precursor;	-3.49891	4.34736e-06	0.000154631	down	NPS233-1_vs_NPS233-2
Glyma.08G063800	RecName: Full=Malate dehydrogenase, glyoxysomal; EC=1.1.1.37; Flags: Precursor;	-3.49411	1.16113e-06	5.04866e-05	down	NPS233-1_vs_NPS233-2
Glyma.16G180200	RecName: Full=Protein DETOXIFICATION 34 {ECO:0000303|PubMed:11739388}; Short=AtDTX34 {ECO:0000303|PubMed:11739388}; AltName: Full=Multidrug and toxic compound extrusion protein 34 {ECO:0000305}; Short=MATE protein 34 {ECO:0000305};	-3.49351	2.29994e-07	1.23209e-05	down	NPS233-1_vs_NPS233-2
Glyma.17G059100	RecName: Full=Protein CHLOROPLAST IMPORT APPARATUS 2; Flags: Precursor;	-3.49136	7.68824e-06	0.000249206	down	NPS233-1_vs_NPS233-2
Glyma.06G004900	--	-3.48626	0.000258113	0.00450428	down	NPS233-1_vs_NPS233-2
Glyma.02G229300	RecName: Full=BAG family molecular chaperone regulator 4; AltName: Full=Bcl-2-associated athanogene 4;	-3.48331	1.12621e-05	0.000345012	down	NPS233-1_vs_NPS233-2
Glyma.17G218400	RecName: Full=Probable folate-biopterin transporter 2;	-3.47526	0.0041048	0.0402431	down	NPS233-1_vs_NPS233-2
Glyma.07G146800	RecName: Full=Glycerol-3-phosphate 2-O-acyltransferase 6; Short=AtGPAT6; EC=2.3.1.198; AltName: Full=Glycerol-3-phosphate acyltransferase 6;	-3.47455	1.1321e-12	2.03222e-10	down	NPS233-1_vs_NPS233-2
Glyma.03G005400	RecName: Full=Protein DETOXIFICATION 21 {ECO:0000303|PubMed:11739388}; Short=AtDTX21 {ECO:0000303|PubMed:11739388}; AltName: Full=Multidrug and toxic compound extrusion protein 21 {ECO:0000305}; Short=MATE protein 21 {ECO:0000305};	-3.47424	2.68954e-07	1.43082e-05	down	NPS233-1_vs_NPS233-2
Glyma.11G011900	--	-3.4738	0.00212885	0.0243833	down	NPS233-1_vs_NPS233-2
Glyma.11G038800	RecName: Full=Serine/threonine-protein kinase SRK2A {ECO:0000303|PubMed:27268428}; EC=2.7.11.1 {ECO:0000269|PubMed:27268428}; AltName: Full=SNF1-related kinase 2A {ECO:0000305}; Short=PpSnRK2A {ECO:0000303|PubMed:27268428};	-3.47127	5.06236e-05	0.0011935	down	NPS233-1_vs_NPS233-2
Glyma.07G077400	RecName: Full=Probable methyltransferase PMT15; EC=2.1.1.-;	-3.46382	2.27609e-09	2.10442e-07	down	NPS233-1_vs_NPS233-2
Glyma.04G067200	RecName: Full=Ethylene-responsive transcription factor SHINE 2;	-3.46108	1.98471e-05	0.000549843	down	NPS233-1_vs_NPS233-2
Glyma.02G109100	RecName: Full=Expansin-A1; Short=AtEXPA1; AltName: Full=Alpha-expansin-1; Short=At-EXP1; Short=AtEx1; AltName: Full=Ath-ExpAlpha-1.2; Flags: Precursor;	-3.45548	1.39943e-20	8.33855e-18	down	NPS233-1_vs_NPS233-2
Glyma.19G244100	RecName: Full=Protein ECERIFERUM 2;	-3.45239	0.00226166	0.0254767	down	NPS233-1_vs_NPS233-2
Glyma.18G061800	RecName: Full=Jacalin-related lectin 3; AltName: Full=Mannose-binding lectin superfamily protein;	-3.44903	0.00366199	0.0369286	down	NPS233-1_vs_NPS233-2
Glyma.19G198900	RecName: Full=NDR1/HIN1-like protein 1 {ECO:0000303|Ref.1};	-3.44802	1.72733e-08	1.28695e-06	down	NPS233-1_vs_NPS233-2
Glyma.02G019100	RecName: Full=Homeobox-leucine zipper protein ATHB-13; AltName: Full=HD-ZIP protein ATHB-13; AltName: Full=Homeodomain transcription factor ATHB-13;	-3.44748	3.4962e-05	0.000884744	down	NPS233-1_vs_NPS233-2
Glyma.20G058000	RecName: Full=3-hydroxy-3-methylglutaryl-coenzyme A reductase 1; Short=HMG-CoA reductase 1; EC=1.1.1.34;	-3.44625	9.80015e-06	0.000307592	down	NPS233-1_vs_NPS233-2
Glyma.06G310100	RecName: Full=Probable carboxylesterase 6; AltName: Full=AtCXE6; EC=3.1.1.1;	-3.44601	7.04808e-10	7.33382e-08	down	NPS233-1_vs_NPS233-2
Glyma.10G267000	RecName: Full=Fruit protein pKIWI502;	-3.44197	4.67282e-06	0.000163741	down	NPS233-1_vs_NPS233-2
Glyma.13G284100	RecName: Full=G-type lectin S-receptor-like serine/threonine-protein kinase At4g27290; EC=2.7.11.1; Flags: Precursor;	-3.44145	0.003409	0.0349508	down	NPS233-1_vs_NPS233-2
Glyma.13G314200	--	-3.43702	0.00064544	0.00941207	down	NPS233-1_vs_NPS233-2
Glyma.05G120300	--	-3.42735	0.00451501	0.0432456	down	NPS233-1_vs_NPS233-2
Glyma.20G187400	RecName: Full=Pleiotropic drug resistance protein 2; AltName: Full=NpPDR2;	-3.42344	0.00351336	0.0358055	down	NPS233-1_vs_NPS233-2
Glyma.16G180000	RecName: Full=Protein DETOXIFICATION 34 {ECO:0000303|PubMed:11739388}; Short=AtDTX34 {ECO:0000303|PubMed:11739388}; AltName: Full=Multidrug and toxic compound extrusion protein 34 {ECO:0000305}; Short=MATE protein 34 {ECO:0000305};	-3.42018	2.63962e-09	2.36227e-07	down	NPS233-1_vs_NPS233-2
Glyma.12G233000	RecName: Full=Probable LRR receptor-like serine/threonine-protein kinase At1g53430; EC=2.7.11.1; Flags: Precursor;	-3.41985	3.20181e-08	2.2086e-06	down	NPS233-1_vs_NPS233-2
Glyma.16G165200	RecName: Full=Chlorophyll a-b binding protein, chloroplastic; AltName: Full=LHCII type I CAB; Short=LHCP; Flags: Precursor; Fragment;	-3.41182	0.000660621	0.00958337	down	NPS233-1_vs_NPS233-2
Glyma.13G339500	--	-3.40648	0.00498756	0.0467332	down	NPS233-1_vs_NPS233-2
Glyma.06G168200	--	-3.40391	9.77091e-05	0.00203203	down	NPS233-1_vs_NPS233-2
Glyma.06G169400	RecName: Full=Protein NUCLEAR FUSION DEFECTIVE 4 {ECO:0000303|PubMed:16698901};	-3.39703	0.000253076	0.00443656	down	NPS233-1_vs_NPS233-2
Glyma.13G238500	--	-3.38161	0.000101304	0.00208281	down	NPS233-1_vs_NPS233-2
Glyma.13G224000	RecName: Full=Heat shock 70 kDa protein;	-3.37764	2.07278e-05	0.00056809	down	NPS233-1_vs_NPS233-2
Glyma.04G234700	--	-3.37723	0.000843632	0.0115659	down	NPS233-1_vs_NPS233-2
Glyma.20G247800	--	-3.37328	4.15831e-11	5.36317e-09	down	NPS233-1_vs_NPS233-2
Glyma.04G082700	RecName: Full=Protein NRT1/ PTR FAMILY 1.2; Short=AtNPF1.2; AltName: Full=Nitrate transporter 1.11;	-3.36898	0.000345611	0.00574384	down	NPS233-1_vs_NPS233-2
Glyma.01G243400	--	-3.36785	4.73908e-10	5.12221e-08	down	NPS233-1_vs_NPS233-2
Glyma.14G159600	RecName: Full=Probable pectinesterase/pectinesterase inhibitor 61; Includes: RecName: Full=Pectinesterase inhibitor 61; AltName: Full=Pectin methylesterase inhibitor 61; Includes: RecName: Full=Pectinesterase 61; Short=PE 61; EC=3.1.1.11; AltName: Full=AtPMEpcrF; AltName: Full=Pectin methylesterase 61; Short=AtPME61;	-3.36763	2.81916e-09	2.50107e-07	down	NPS233-1_vs_NPS233-2
Glyma.18G156900	RecName: Full=Transcription factor bHLH62; AltName: Full=Basic helix-loop-helix protein 62; Short=AtbHLH62; Short=bHLH 62; AltName: Full=Transcription factor EN 85; AltName: Full=bHLH transcription factor bHLH062;	-3.36369	0.00221168	0.0250841	down	NPS233-1_vs_NPS233-2
Glyma.11G182100	--	-3.36331	3.53205e-05	0.000892344	down	NPS233-1_vs_NPS233-2
Glyma.01G028800	RecName: Full=F-box/kelch-repeat protein At1g23390;	-3.36305	9.22795e-07	4.12316e-05	down	NPS233-1_vs_NPS233-2
Glyma.01G033800	RecName: Full=WAT1-related protein At5g40240;	-3.3618	5.65786e-05	0.00131273	down	NPS233-1_vs_NPS233-2
Glyma.18G247800	RecName: Full=Cyclin-U4-1; Short=CycU4;1; AltName: Full=Cyclin-P4.1; Short=CycP4;1;	-3.36064	0.000532592	0.00806933	down	NPS233-1_vs_NPS233-2
Glyma.05G057100	RecName: Full=14 kDa proline-rich protein DC2.15; Flags: Precursor;	-3.35892	0.000142294	0.00275401	down	NPS233-1_vs_NPS233-2
Glyma.07G161900	RecName: Full=Long chain acyl-CoA synthetase 2; EC=6.2.1.3; AltName: Full=Protein Botrytis resistant 1; AltName: Full=Protein LATERAL ROOT DEVELOPMENT 2;	-3.35468	8.80488e-08	5.34139e-06	down	NPS233-1_vs_NPS233-2
Glyma.17G118500	RecName: Full=EG45-like domain containing protein; AltName: Full=Blight-associated protein p12; AltName: Full=Plant natriuretic peptide; Short=PNP; Flags: Precursor;	-3.35367	0.00012942	0.00254659	down	NPS233-1_vs_NPS233-2
Glyma.08G033100	--	-3.34753	0.00298629	0.0317077	down	NPS233-1_vs_NPS233-2
Glyma.03G073500	--	-3.34321	1.569e-12	2.73647e-10	down	NPS233-1_vs_NPS233-2
Glyma.15G068800	RecName: Full=PAP-specific phosphatase HAL2-like; AltName: Full=3'(2'),5'-bisphosphate nucleotidase; EC=3.1.3.7; AltName: Full=3'(2'),5-bisphosphonucleoside 3'(2')-phosphohydrolase; AltName: Full=DPNPase; AltName: Full=Halotolerance protein;	-3.3427	0.000810079	0.0112263	down	NPS233-1_vs_NPS233-2
Glyma.04G050700	RecName: Full=Protein NDL2 {ECO:0000305}; AltName: Full=Protein N-MYC DOWNREGULATED-LIKE 2 {ECO:0000303|PubMed:19948787};	-3.34056	3.55037e-07	1.82856e-05	down	NPS233-1_vs_NPS233-2
Glyma.08G162500	--	-3.33931	3.35288e-05	0.000853939	down	NPS233-1_vs_NPS233-2
Glyma.13G175700	RecName: Full=17.5 kDa class I heat shock protein; AltName: Full=HSP 17.5-E;	-3.33858	3.68464e-05	0.00092104	down	NPS233-1_vs_NPS233-2
Glyma.17G164400	RecName: Full=Probable esterase KAI2; AltName: Full=Protein DWARF-14-like; Short=Protein D14-like; AltName: Full=Protein HYPOSENSITIVE TO LIGHT; AltName: Full=Protein KARRIKIN INSENSITIVE 2;	-3.33817	2.86715e-05	0.000750938	down	NPS233-1_vs_NPS233-2
Glyma.15G091000	RecName: Full=Auxin response factor 6;	-3.33174	5.92265e-06	0.000201108	down	NPS233-1_vs_NPS233-2
Glyma.03G194800	--	-3.32573	0.00337774	0.0347463	down	NPS233-1_vs_NPS233-2
Glyma.09G186800	RecName: Full=Probable 3-beta-hydroxysteroid-Delta(8),Delta(7)-isomerase; EC=5.3.3.5; AltName: Full=Cholestenol Delta-isomerase; AltName: Full=Delta(8)-Delta(7) sterol isomerase; Short=D8-D7 sterol isomerase;	-3.32288	0.00103322	0.0136177	down	NPS233-1_vs_NPS233-2
Glyma.17G129000	RecName: Full=Uridine kinase-like protein 1, chloroplastic; Includes: RecName: Full=Uridine kinase; Short=UK; EC=2.7.1.48; Includes: RecName: Full=Putative uracil phosphoribosyltransferase; Short=UPRTase; EC=2.4.2.9; AltName: Full=UMP pyrophosphorylase; Flags: Precursor;	-3.3156	0.0015597	0.0190895	down	NPS233-1_vs_NPS233-2
Glyma.12G178200	--	-3.31302	5.20971e-07	2.55331e-05	down	NPS233-1_vs_NPS233-2
Glyma.10G080000	RecName: Full=NDR1/HIN1-like protein 1 {ECO:0000303|Ref.1};	-3.31117	9.49414e-14	1.96561e-11	down	NPS233-1_vs_NPS233-2
Glyma.15G046500	--	-3.31026	0.00527668	0.048699	down	NPS233-1_vs_NPS233-2
Glyma.07G079500	--	-3.3097	3.15395e-07	1.66061e-05	down	NPS233-1_vs_NPS233-2
Glyma.17G234000	--	-3.3094	2.84333e-05	0.000746131	down	NPS233-1_vs_NPS233-2
Glyma.08G243600	RecName: Full=Beta-amyrin 28-oxidase; EC=1.14.13.-; AltName: Full=Cytochrome P450 CYP716A52v2;	-3.30674	0.000285597	0.00491131	down	NPS233-1_vs_NPS233-2
Glyma.12G080800	--	-3.30666	2.49764e-12	4.1442e-10	down	NPS233-1_vs_NPS233-2
Glyma.14G008700	RecName: Full=Disease resistance protein RFL1; AltName: Full=RPS5-like protein 1; AltName: Full=pNd13/pNd14;	-3.28902	0.000103305	0.00211449	down	NPS233-1_vs_NPS233-2
Glyma.11G042200	RecName: Full=Glycine cleavage system H protein, mitochondrial; Flags: Precursor;	-3.28617	1.14625e-06	5.01216e-05	down	NPS233-1_vs_NPS233-2
Glyma.07G029900	--	-3.28138	3.63884e-05	0.000911819	down	NPS233-1_vs_NPS233-2
Glyma.13G365400	RecName: Full=G-type lectin S-receptor-like serine/threonine-protein kinase SD2-5; EC=2.7.11.1; AltName: Full=S-domain-2 (SD2) receptor kinase 5; Short=SD2-5; Flags: Precursor;	-3.27578	0.0018022	0.0213757	down	NPS233-1_vs_NPS233-2
Glyma.01G218400	--	-3.27383	0.00456148	0.0436061	down	NPS233-1_vs_NPS233-2
Glyma.04G008300	RecName: Full=Fructose-bisphosphate aldolase 1, chloroplastic {ECO:0000305}; Short=AtFBA1 {ECO:0000303|PubMed:22561114}; EC=4.1.2.13 {ECO:0000305}; Flags: Precursor;	-3.27369	4.21601e-11	5.41484e-09	down	NPS233-1_vs_NPS233-2
Glyma.06G048300	--	-3.26704	2.16183e-07	1.17186e-05	down	NPS233-1_vs_NPS233-2
Glyma.09G210100	--	-3.26623	7.03495e-05	0.0015515	down	NPS233-1_vs_NPS233-2
Glyma.19G257000	--	-3.25846	0.000169293	0.00318998	down	NPS233-1_vs_NPS233-2
Glyma.13G348000	--	-3.25834	3.31881e-07	1.7355e-05	down	NPS233-1_vs_NPS233-2
Glyma.12G167400	--	-3.2549	3.1207e-10	3.44579e-08	down	NPS233-1_vs_NPS233-2
Glyma.01G017700	--	-3.24435	0.00233294	0.0261357	down	NPS233-1_vs_NPS233-2
Glyma.13G321700	RecName: Full=Serine carboxypeptidase-like 51; EC=3.4.16.-; Flags: Precursor;	-3.24272	6.11089e-21	4.07782e-18	down	NPS233-1_vs_NPS233-2
Glyma.19G046800	RecName: Full=Ribulose bisphosphate carboxylase small chain 1, chloroplastic; Short=RuBisCO small subunit 1; EC=4.1.1.39; Flags: Precursor;	-3.24094	2.05495e-10	2.35369e-08	down	NPS233-1_vs_NPS233-2
Glyma.07G251200	RecName: Full=CASP-like protein 1E1; Short=GmCASPL1E1;	-3.23895	6.32037e-06	0.000212497	down	NPS233-1_vs_NPS233-2
Glyma.05G199900	RecName: Full=Probable beta-1,4-xylosyltransferase IRX10L; EC=2.4.2.-; AltName: Full=Glucuronoxylan glucuronosyltransferase 1; Short=AtGUT1; AltName: Full=Glucuronoxylan glucuronosyltransferase 2; Short=AtGUT2; AltName: Full=Protein IRREGULAR XYLEM 10-like; AltName: Full=Xylan xylosyltransferase IRX10L;	-3.23577	0.00333948	0.0343989	down	NPS233-1_vs_NPS233-2
Glyma.16G043400	RecName: Full=Nucleoside-triphosphatase; Short=NTPase; EC=3.6.1.15; AltName: Full=Nucleoside triphosphate phosphohydrolase; Short=Apyrase;	-3.23484	0.000476582	0.00739378	down	NPS233-1_vs_NPS233-2
Glyma.17G043900	RecName: Full=RING-H2 finger protein ATL80; EC=2.3.2.27 {ECO:0000305}; AltName: Full=RING-type E3 ubiquitin transferase ATL80 {ECO:0000305};	-3.23323	0.000268775	0.0046612	down	NPS233-1_vs_NPS233-2
Glyma.10G039800	--	-3.23092	0.00275584	0.0299551	down	NPS233-1_vs_NPS233-2
Glyma.08G201300	RecName: Full=ABC transporter G family member 36; Short=ABC transporter ABCG.36; Short=AtABCG36; AltName: Full=Pleiotropic drug resistance protein 8; AltName: Full=Protein PENETRATION 3;	-3.22938	0.00538848	0.0495193	down	NPS233-1_vs_NPS233-2
Glyma.09G236200	RecName: Full=Expansin-A1; Short=AtEXPA1; AltName: Full=Alpha-expansin-1; Short=At-EXP1; Short=AtEx1; AltName: Full=Ath-ExpAlpha-1.2; Flags: Precursor;	-3.22772	5.23785e-08	3.43549e-06	down	NPS233-1_vs_NPS233-2
Glyma.03G247400	RecName: Full=Auxin-responsive protein IAA16; AltName: Full=Indoleacetic acid-induced protein 16;	-3.22754	3.1407e-15	8.38321e-13	down	NPS233-1_vs_NPS233-2
Glyma.13G267100	--	-3.22517	0.000151438	0.00288192	down	NPS233-1_vs_NPS233-2
Glyma.10G161700	RecName: Full=Probable aldo-keto reductase 1; Short=GmAKR1; EC=1.1.1.-;	-3.22516	0.000131947	0.00259298	down	NPS233-1_vs_NPS233-2
Glyma.05G216400	RecName: Full=Endoglucanase 6; EC=3.2.1.4; AltName: Full=Endo-1,4-beta glucanase 6; Flags: Precursor;	-3.22212	1.1364e-11	1.60752e-09	down	NPS233-1_vs_NPS233-2
Glyma.03G256200	RecName: Full=Jasmonic acid-amido synthetase JAR1 {ECO:0000305}; EC=6.3.2.-; AltName: Full=Auxin-responsive GH3-like protein 5 {ECO:0000303|PubMed:15856348}; Short=OsGH3-5 {ECO:0000303|PubMed:15856348}; AltName: Full=Indole-3-acetic acid-amido synthetase GH3.5 {ECO:0000305}; AltName: Full=Jasmonate-amino acid synthetase JAR1 {ECO:0000305}; AltName: Full=Protein JASMONATE RESISTANT 1 {ECO:0000303|…	-3.22163	0.00338138	0.0347604	down	NPS233-1_vs_NPS233-2
Glyma.U030300	--	-3.2096	1.91948e-05	0.000535152	down	NPS233-1_vs_NPS233-2
Glyma.17G242200	RecName: Full=Abscisic acid 8'-hydroxylase 3; Short=ABA 8'-hydroxylase 3; EC=1.14.13.93; AltName: Full=Cytochrome P450 707A7; AltName: Full=OsABA8ox3;	-3.20504	0.00111658	0.0145231	down	NPS233-1_vs_NPS233-2
Glyma.11G075000	--	-3.19773	0.00219213	0.0249221	down	NPS233-1_vs_NPS233-2
Glyma.04G231400	RecName: Full=Homeobox-leucine zipper protein ATHB-7; AltName: Full=HD-ZIP protein ATHB-7; AltName: Full=Homeodomain transcription factor ATHB-7;	-3.19602	0.000475722	0.00739378	down	NPS233-1_vs_NPS233-2
Glyma.12G182600	RecName: Full=Serine/threonine-protein kinase D6PKL2; EC=2.7.11.1; AltName: Full=D6 protein kinase-like 2; AltName: Full=Serine/threonine-protein kinase AtPK5;	-3.19555	0.0054652	0.0499582	down	NPS233-1_vs_NPS233-2
Glyma.07G262100	RecName: Full=Aminomethyltransferase, mitochondrial; EC=2.1.2.10; AltName: Full=Glycine cleavage system T protein; Short=GCVT; Flags: Precursor;	-3.19508	2.79775e-12	4.56807e-10	down	NPS233-1_vs_NPS233-2
Glyma.10G111200	RecName: Full=Protein trichome birefringence-like 36;	-3.19302	0.00467306	0.0444096	down	NPS233-1_vs_NPS233-2
Glyma.17G051200	RecName: Full=Protein Brevis radix-like 4; Short=AtBRXL4;	-3.18996	0.00160606	0.0195243	down	NPS233-1_vs_NPS233-2
Glyma.19G022100	RecName: Full=Myb-related protein 306;	-3.18816	0.0040092	0.0395458	down	NPS233-1_vs_NPS233-2
Glyma.03G033900	RecName: Full=Cyclin-U2-1; Short=CycU2;1; AltName: Full=Cyclin-P3.1; Short=CycP3;1;	-3.18006	0.000498807	0.00765186	down	NPS233-1_vs_NPS233-2
Glyma.07G234200	RecName: Full=Squamosa promoter-binding-like protein 1;	-3.17965	2.83393e-10	3.15183e-08	down	NPS233-1_vs_NPS233-2
Glyma.02G255200	--	-3.17707	0.00435921	0.0421052	down	NPS233-1_vs_NPS233-2
Glyma.12G134800	RecName: Full=Early nodulin-like protein 1; AltName: Full=Phytocyanin-like protein; Flags: Precursor;	-3.17554	0.0013272	0.0167241	down	NPS233-1_vs_NPS233-2
Glyma.16G154700	--	-3.16918	0.00118832	0.0152878	down	NPS233-1_vs_NPS233-2
Glyma.17G092400	RecName: Full=Spermidine synthase; Short=SPDSY; EC=2.5.1.16; AltName: Full=Putrescine aminopropyltransferase;	-3.16843	0.00106413	0.0139472	down	NPS233-1_vs_NPS233-2
Glyma.08G336100	--	-3.16799	0.000428461	0.00680043	down	NPS233-1_vs_NPS233-2
Glyma.11G231600	RecName: Full=Taxadien-5-alpha-ol O-acetyltransferase; EC=2.3.1.162; AltName: Full=Taxa-4(20),11(12)-dien-5alpha-ol-O-acetyltransferase; Short=Taxadienol acetyltransferase;	-3.16467	3.10798e-05	0.000801841	down	NPS233-1_vs_NPS233-2
Glyma.13G116100	RecName: Full=Protein TIFY 3B; AltName: Full=Jasmonate ZIM domain-containing protein 12;	-3.16394	7.40914e-06	0.000242982	down	NPS233-1_vs_NPS233-2
Glyma.19G013500	RecName: Full=U-box domain-containing protein 40; EC=2.3.2.27; AltName: Full=Plant U-box protein 40; AltName: Full=RING-type E3 ubiquitin transferase PUB40 {ECO:0000305};	-3.16099	0.00111854	0.0145363	down	NPS233-1_vs_NPS233-2
Glyma.09G216600	--	-3.15812	0.00451398	0.0432456	down	NPS233-1_vs_NPS233-2
Glyma.08G093500	RecName: Full=Purple acid phosphatase 3; EC=3.1.3.2; Flags: Precursor;	-3.1574	2.23364e-05	0.000607296	down	NPS233-1_vs_NPS233-2
Glyma.01G151400	--	-3.15708	0.00162488	0.0196678	down	NPS233-1_vs_NPS233-2
Glyma.13G102700	--	-3.15574	0.00199994	0.0232715	down	NPS233-1_vs_NPS233-2
Glyma.15G030100	RecName: Full=Calmodulin-like protein 5; AltName: Full=Protein MULTICOPY SUPPRESSORS OF SNF4 DEFICIENCY IN YEAST 3;	-3.15568	0.000217533	0.00390718	down	NPS233-1_vs_NPS233-2
novel.147	RecName: Full=Probable indole-3-pyruvate monooxygenase YUCCA9; EC=1.14.13.168; AltName: Full=Flavin-containing monooxygenase YUCCA9;	-3.15215	0.00277074	0.0300533	down	NPS233-1_vs_NPS233-2
Glyma.19G180700	RecName: Full=Fasciclin-like arabinogalactan protein 11; Flags: Precursor;	-3.15033	7.86534e-06	0.000254142	down	NPS233-1_vs_NPS233-2
Glyma.07G215900	RecName: Full=Uncharacterized protein At4g06744; Flags: Precursor;	-3.14976	2.23152e-08	1.62319e-06	down	NPS233-1_vs_NPS233-2
Glyma.02G001100	RecName: Full=Benzyl alcohol O-benzoyltransferase; EC=2.3.1.196; AltName: Full=Benzoyl coenzyme A:benzyl alcohol benzoyl transferase;	-3.14609	1.01648e-10	1.2236e-08	down	NPS233-1_vs_NPS233-2
Glyma.15G025600	--	-3.14417	0.00412965	0.0404222	down	NPS233-1_vs_NPS233-2
Glyma.07G006900	RecName: Full=Seed linoleate 9S-lipoxygenase; EC=1.13.11.58; AltName: Full=Lipoxygenase;	-3.14113	1.86489e-17	7.15557e-15	down	NPS233-1_vs_NPS233-2
Glyma.08G303800	RecName: Full=Probable polyamine oxidase 2; Short=AtPAO2; EC=1.5.3.-; AltName: Full=Amine oxidase 1;	-3.14027	1.29704e-08	9.93498e-07	down	NPS233-1_vs_NPS233-2
Glyma.18G217000	RecName: Full=Probable LRR receptor-like serine/threonine-protein kinase At1g06840; EC=2.7.11.1; Flags: Precursor;	-3.14006	0.00318916	0.0332522	down	NPS233-1_vs_NPS233-2
Glyma.02G072400	--	-3.13845	0.0033903	0.0348145	down	NPS233-1_vs_NPS233-2
Glyma.13G122000	RecName: Full=WAT1-related protein At4g08290;	-3.13841	0.000107408	0.00217336	down	NPS233-1_vs_NPS233-2
Glyma.01G074800	--	-3.13637	0.00215373	0.0245996	down	NPS233-1_vs_NPS233-2
Glyma.16G214900	RecName: Full=TMV resistance protein N;	-3.11473	1.6341e-08	1.22342e-06	down	NPS233-1_vs_NPS233-2
Glyma.05G018900	RecName: Full=MADS-box protein EJ2 {ECO:0000305}; AltName: Full=MADS-box protein 1 {ECO:0000312|EMBL:AAP57412.1}; Short=LeMADS1 {ECO:0000312|EMBL:AAP57412.1}; AltName: Full=Protein ENHANCER-OF-JOINTLESS-2 {ECO:0000303|PubMed:28528644};	-3.11364	3.18068e-05	0.000817021	down	NPS233-1_vs_NPS233-2
Glyma.09G041000	RecName: Full=Probable polygalacturonase; Short=PG {ECO:0000250|UniProtKB:Q7M1E7}; EC=3.2.1.15; AltName: Full=Pectinase {ECO:0000250|UniProtKB:Q7M1E7};	-3.11119	0.000872823	0.0118918	down	NPS233-1_vs_NPS233-2
Glyma.06G039700	RecName: Full=Photosystem I chlorophyll a/b-binding protein 5, chloroplastic {ECO:0000303|PubMed:10366881}; Short=Lhca5 {ECO:0000303|PubMed:10366881}; AltName: Full=LHCI type III LHCA5 {ECO:0000305}; Flags: Precursor;	-3.10842	1.98009e-05	0.00054906	down	NPS233-1_vs_NPS233-2
Glyma.08G292400	RecName: Full=Two-component response regulator ARR3;	-3.10757	0.00396466	0.039247	down	NPS233-1_vs_NPS233-2
Glyma.01G018100	--	-3.10463	1.41318e-07	8.15392e-06	down	NPS233-1_vs_NPS233-2
Glyma.10G214200	RecName: Full=Glutamyl-tRNA(Gln) amidotransferase subunit C, chloroplastic/mitochondrial {ECO:0000255|HAMAP-Rule:MF_03149}; Short=Glu-AdT subunit C {ECO:0000255|HAMAP-Rule:MF_03149}; EC=6.3.5.- {ECO:0000255|HAMAP-Rule:MF_03149};	-3.10411	3.96971e-14	8.52128e-12	down	NPS233-1_vs_NPS233-2
Glyma.07G036400	RecName: Full=Phospholipid:diacylglycerol acyltransferase 1; Short=AtPDAT; EC=2.3.1.158 {ECO:0000250|UniProtKB:O94680};	-3.10302	0.00416255	0.0406146	down	NPS233-1_vs_NPS233-2
Glyma.09G034900	RecName: Full=GDSL esterase/lipase At4g16230; EC=3.1.1.-; AltName: Full=Extracellular lipase At4g16230; Flags: Precursor;	-3.10104	0.000515742	0.00786449	down	NPS233-1_vs_NPS233-2
Glyma.08G344400	--	-3.09838	0.000172399	0.00323865	down	NPS233-1_vs_NPS233-2
Glyma.07G100500	RecName: Full=Beta-glucosidase 44; Short=AtBGLU44; EC=3.2.1.21; Flags: Precursor;	-3.09632	2.52138e-21	1.84277e-18	down	NPS233-1_vs_NPS233-2
Glyma.02G036400	RecName: Full=F-box/kelch-repeat protein At1g23390;	-3.09457	1.30048e-06	5.52139e-05	down	NPS233-1_vs_NPS233-2
Glyma.11G235600	RecName: Full=WEB family protein At2g40480;	-3.09253	1.60589e-06	6.58138e-05	down	NPS233-1_vs_NPS233-2
novel.374	--	-3.09173	0.000410332	0.00658419	down	NPS233-1_vs_NPS233-2
Glyma.02G031800	RecName: Full=Protein ALTERED XYLOGLUCAN 4; AltName: Full=Protein trichome birefringence-like 27;	-3.0907	0.00543583	0.0497787	down	NPS233-1_vs_NPS233-2
Glyma.07G017300	RecName: Full=Dehydration-responsive element-binding protein 3; AltName: Full=Protein TINY 2;	-3.09052	1.76925e-06	7.17424e-05	down	NPS233-1_vs_NPS233-2
Glyma.17G212200	RecName: Full=pEARLI1-like lipid transfer protein 1; AltName: Full=Protein AZELAIC ACID INDUCED 1; Flags: Precursor;	-3.07995	8.31361e-05	0.00178209	down	NPS233-1_vs_NPS233-2
Glyma.17G007400	RecName: Full=CASP-like protein 2B1; Short=VvCASPL2B1;	-3.07975	8.43868e-07	3.83754e-05	down	NPS233-1_vs_NPS233-2
Glyma.20G144600	RecName: Full=Linoleate 9S-lipoxygenase 5; EC=1.13.11.58; AltName: Full=Lipoxygenase 5; Short=AtLOX5;	-3.07702	0.000476166	0.00739378	down	NPS233-1_vs_NPS233-2
Glyma.09G181100	RecName: Full=Non-specific lipid-transfer protein 2; Short=LTP 2;	-3.07046	0.000249065	0.00438305	down	NPS233-1_vs_NPS233-2
Glyma.07G209100	RecName: Full=Probable 2-oxoglutarate-dependent dioxygenase At5g05600 {ECO:0000305}; EC=1.14.11.- {ECO:0000305};	-3.06908	0.00411646	0.0403187	down	NPS233-1_vs_NPS233-2
Glyma.13G363700	--	-3.06543	0.00171318	0.0205151	down	NPS233-1_vs_NPS233-2
Glyma.13G082300	RecName: Full=Flavonol synthase/flavanone 3-hydroxylase; Short=FLS; EC=1.14.11.23 {ECO:0000250|UniProtKB:Q7XZQ6}; EC=1.14.11.9 {ECO:0000250|UniProtKB:Q7XZQ6};	-3.06535	0.0052726	0.0486831	down	NPS233-1_vs_NPS233-2
Glyma.16G043500	RecName: Full=Apyrase 2; Short=AtAPY2; EC=3.6.1.5; AltName: Full=ATP-diphosphatase; AltName: Full=ATP-diphosphohydrolase; AltName: Full=Adenosine diphosphatase; Short=ADPase; AltName: Full=NTPDase; AltName: Full=Nucleoside triphosphate diphosphohydrolase 2;	-3.0603	0.000609614	0.00898786	down	NPS233-1_vs_NPS233-2
Glyma.14G150200	RecName: Full=Esterase; EC=3.1.1.-; AltName: Full=Early nodule-specific protein homolog; AltName: Full=Latex allergen Hev b 13; AltName: Allergen=Hev b 13; Flags: Precursor;	-3.05454	0.00119202	0.0153225	down	NPS233-1_vs_NPS233-2
Glyma.01G105000	RecName: Full=Protein NRT1/ PTR FAMILY 5.7; Short=AtNPF5.7;	-3.051	0.00441757	0.0425885	down	NPS233-1_vs_NPS233-2
Glyma.07G226600	RecName: Full=Nodulin-related protein 1 {ECO:0000303|PubMed:20016941}; Short=AtNRP1 {ECO:0000303|PubMed:20016941}; AltName: Full=RPS2-interacting protein 11 {ECO:0000303|Ref.5};	-3.04842	2.65765e-05	0.000706925	down	NPS233-1_vs_NPS233-2
Glyma.08G220300	--	-3.04563	0.00429994	0.0416375	down	NPS233-1_vs_NPS233-2
Glyma.05G188200	RecName: Full=Probable plastid-lipid-associated protein 7, chloroplastic; AltName: Full=Fibrillin-5; Flags: Precursor;	-3.04138	0.0015447	0.0189361	down	NPS233-1_vs_NPS233-2
Glyma.16G005800	RecName: Full=Phospholipid:diacylglycerol acyltransferase 1; Short=AtPDAT; EC=2.3.1.158 {ECO:0000250|UniProtKB:O94680};	-3.04011	3.14632e-06	0.000117557	down	NPS233-1_vs_NPS233-2
Glyma.13G291700	RecName: Full=Protein trichome birefringence-like 39;	-3.03712	0.00042153	0.0067144	down	NPS233-1_vs_NPS233-2
Glyma.14G134100	RecName: Full=Plasma membrane ATPase 4; EC=3.6.3.6; AltName: Full=Proton pump 4;	-3.03651	7.28341e-09	5.94605e-07	down	NPS233-1_vs_NPS233-2
Glyma.04G255800	RecName: Full=Glucuronoxylan 4-O-methyltransferase 2; EC=2.1.1.112;	-3.03464	5.83434e-06	0.00019899	down	NPS233-1_vs_NPS233-2
Glyma.16G077400	--	-3.01948	0.00262977	0.0287724	down	NPS233-1_vs_NPS233-2
Glyma.18G200500	RecName: Full=Vacuolar cation/proton exchanger 3; AltName: Full=Ca(2+)/H(+) antiporter CAX3; AltName: Full=Ca(2+)/H(+) exchanger 3; AltName: Full=Protein CATION EXCHANGER 3;	-3.01927	2.84348e-05	0.000746131	down	NPS233-1_vs_NPS233-2
Glyma.07G107500	RecName: Full=Protein indeterminate-domain 14 {ECO:0000303|PubMed:16784536}; Short=AtIDD14; AltName: Full=Transcriptional regulator of starch metabolism IDD14 {ECO:0000312|EMBL:AEE34752.1};	-3.01847	4.77494e-05	0.00113621	down	NPS233-1_vs_NPS233-2
Glyma.02G099200	RecName: Full=Allene oxide cyclase, chloroplastic {ECO:0000303|Ref.1, ECO:0000303|Ref.2}; Short=OsAOC {ECO:0000303|Ref.1}; EC=5.3.99.6 {ECO:0000269|PubMed:23347338}; AltName: Full=Protein COLEOPTILE PHOTOMORPHOGENESIS 2 {ECO:0000303|PubMed:23347338}; AltName: Full=Protein HEBIBA {ECO:0000303|PubMed:14605232}; Flags: Precursor;	-3.01461	2.406e-06	9.48067e-05	down	NPS233-1_vs_NPS233-2
Glyma.02G016400	RecName: Full=Endoglucanase 17; EC=3.2.1.4; AltName: Full=Endo-1,4-beta glucanase 17; Flags: Precursor;	-3.01455	0.00522774	0.0483946	down	NPS233-1_vs_NPS233-2
Glyma.07G206400	--	-3.00534	0.000483947	0.00748171	down	NPS233-1_vs_NPS233-2
Glyma.01G033200	RecName: Full=Protein SUPPRESSOR OF npr1-1, CONSTITUTIVE 1 {ECO:0000303|PubMed:14576290}; Short=AtSNC1 {ECO:0000303|PubMed:14576290}; AltName: Full=Disease resistance RPP5-like protein;	-2.99963	0.00525425	0.048565	down	NPS233-1_vs_NPS233-2
Glyma.16G157100	RecName: Full=Sucrose transport protein SUC1; AltName: Full=Sucrose permease 1; AltName: Full=Sucrose-proton symporter 1;	-2.99398	0.000133601	0.00261712	down	NPS233-1_vs_NPS233-2
Glyma.20G115900	--	-2.98543	2.15353e-08	1.57768e-06	down	NPS233-1_vs_NPS233-2
Glyma.07G110300	RecName: Full=Hydroquinone glucosyltransferase; EC=2.4.1.218; AltName: Full=Arbutin synthase;	-2.98518	0.000260837	0.00454408	down	NPS233-1_vs_NPS233-2
novel.157	RecName: Full=Actin-depolymerizing factor 5; Short=ADF-5; Short=AtADF5;	-2.98501	0.000791702	0.0110213	down	NPS233-1_vs_NPS233-2
Glyma.08G345000	--	-2.98316	2.64977e-12	4.37297e-10	down	NPS233-1_vs_NPS233-2
Glyma.18G025700	RecName: Full=RING-H2 finger protein ATL66; EC=2.3.2.27 {ECO:0000305}; AltName: Full=RING-type E3 ubiquitin transferase ATL66 {ECO:0000305};	-2.97983	0.00160815	0.0195243	down	NPS233-1_vs_NPS233-2
Glyma.16G088400	RecName: Full=UV-B-induced protein At3g17800, chloroplastic {ECO:0000305}; Flags: Precursor;	-2.9778	0.00215157	0.0245885	down	NPS233-1_vs_NPS233-2
Glyma.17G119400	RecName: Full=Protein argonaute PNH1; AltName: Full=Protein PINHEAD homolog 1; Short=OsPNH1;	-2.97715	6.81396e-06	0.000226681	down	NPS233-1_vs_NPS233-2
Glyma.06G190400	RecName: Full=Mitochondrial outer membrane protein porin 1; AltName: Full=Voltage-dependent anion-selective channel protein 1; Short=AtVDAC1; Short=VDAC-1;	-2.97647	0.000140341	0.00272653	down	NPS233-1_vs_NPS233-2
Glyma.03G078600	RecName: Full=Glycerol-3-phosphate 2-O-acyltransferase 6; Short=AtGPAT6; EC=2.3.1.198; AltName: Full=Glycerol-3-phosphate acyltransferase 6;	-2.97565	0.00310885	0.0326521	down	NPS233-1_vs_NPS233-2
Glyma.11G000800	--	-2.97348	2.65401e-06	0.000102731	down	NPS233-1_vs_NPS233-2
novel.8	--	-2.97032	1.59027e-05	0.000460519	down	NPS233-1_vs_NPS233-2
Glyma.11G229500	RecName: Full=GDSL esterase/lipase CPRD49; EC=3.1.1.-; AltName: Full=Extracellular lipase CPRD49; Flags: Precursor;	-2.96922	9.00462e-05	0.00190756	down	NPS233-1_vs_NPS233-2
Glyma.07G165300	--	-2.96222	9.97306e-07	4.42389e-05	down	NPS233-1_vs_NPS233-2
Glyma.19G211600	RecName: Full=Indole-3-acetic acid-induced protein ARG2;	-2.96049	5.47932e-08	3.53347e-06	down	NPS233-1_vs_NPS233-2
Glyma.13G212800	RecName: Full=Histidine-containing phosphotransfer protein 1;	-2.95641	6.40319e-09	5.31223e-07	down	NPS233-1_vs_NPS233-2
Glyma.07G247500	RecName: Full=Protein RALF-like 33; Flags: Precursor;	-2.95343	2.52262e-08	1.80499e-06	down	NPS233-1_vs_NPS233-2
Glyma.15G154700	RecName: Full=Plasma membrane-associated cation-binding protein 1; Short=AtPCAP1; AltName: Full=Microtubule-destabilizing protein 25;	-2.9521	1.37978e-05	0.000406076	down	NPS233-1_vs_NPS233-2
Glyma.09G065900	RecName: Full=Metalloendoproteinase 2-MMP {ECO:0000303|PubMed:10574937}; Short=At2-MMP {ECO:0000303|PubMed:10574937}; EC=3.4.24.- {ECO:0000305}; Flags: Precursor;	-2.95149	0.000889731	0.0120792	down	NPS233-1_vs_NPS233-2
Glyma.18G005200	--	-2.94628	0.00246184	0.0273008	down	NPS233-1_vs_NPS233-2
Glyma.17G061500	--	-2.94559	0.00389392	0.0387072	down	NPS233-1_vs_NPS233-2
Glyma.10G208800	RecName: Full=Amino acid transporter AVT1C {ECO:0000305}; Short=AtAvt1C {ECO:0000303|PubMed:27925655};	-2.94492	4.28286e-05	0.00103762	down	NPS233-1_vs_NPS233-2
Glyma.13G279600	RecName: Full=COP1-interacting protein 7 {ECO:0000303|PubMed:9668129};	-2.94344	1.81242e-08	1.34707e-06	down	NPS233-1_vs_NPS233-2
Glyma.11G226900	RecName: Full=Sedoheptulose-1,7-bisphosphatase, chloroplastic; EC=3.1.3.37; AltName: Full=SED(1,7)P2ase; AltName: Full=Sedoheptulose bisphosphatase; Short=SBPase; Flags: Precursor;	-2.94331	0.00453278	0.0433858	down	NPS233-1_vs_NPS233-2
Glyma.08G223300	RecName: Full=D-3-phosphoglycerate dehydrogenase 2, chloroplastic; Short=PGDH; EC=1.1.1.95 {ECO:0000269|PubMed:24368794, ECO:0000269|PubMed:9867856}; Flags: Precursor;	-2.94184	1.70158e-08	1.27085e-06	down	NPS233-1_vs_NPS233-2
Glyma.17G064600	RecName: Full=4-coumarate--CoA ligase 1; Short=4CL 1; EC=6.2.1.12; AltName: Full=4-coumaroyl-CoA synthase 1;	-2.94152	0.000576042	0.00860865	down	NPS233-1_vs_NPS233-2
Glyma.16G161300	RecName: Full=UPF0481 protein At3g47200;	-2.94105	0.00046638	0.00728549	down	NPS233-1_vs_NPS233-2
Glyma.03G044300	RecName: Full=Dirigent protein 19; Short=AtDIR19; Flags: Precursor;	-2.93806	3.86613e-06	0.00014051	down	NPS233-1_vs_NPS233-2
Glyma.13G372000	RecName: Full=4-coumarate--CoA ligase 1; Short=4CL 1; EC=6.2.1.12; AltName: Full=4-coumaroyl-CoA synthase 1;	-2.93404	0.00156705	0.0191489	down	NPS233-1_vs_NPS233-2
Glyma.05G240200	RecName: Full=MACPF domain-containing protein At1g14780;	-2.93385	0.00446593	0.0429468	down	NPS233-1_vs_NPS233-2
Glyma.14G160100	RecName: Full=Bidirectional sugar transporter SWEET3 {ECO:0000303|PubMed:21107422}; Short=AtSWEET3 {ECO:0000303|PubMed:21107422}; AltName: Full=Protein SUGARS WILL EVENTUALLY BE EXPORTED TRANSPORTERS 3 {ECO:0000303|PubMed:21107422};	-2.93187	0.000252544	0.00442976	down	NPS233-1_vs_NPS233-2
Glyma.10G023900	--	-2.93125	4.70535e-05	0.00112139	down	NPS233-1_vs_NPS233-2
Glyma.01G168400	--	-2.92847	0.00137088	0.0171757	down	NPS233-1_vs_NPS233-2
Glyma.10G289900	RecName: Full=WUSCHEL-related homeobox 13;	-2.92762	4.00894e-05	0.000987628	down	NPS233-1_vs_NPS233-2
Glyma.07G257500	RecName: Full=Basic 7S globulin; AltName: Full=SBg7S; Short=Bg; Contains: RecName: Full=Basic 7S globulin high kDa subunit; Contains: RecName: Full=Basic 7S globulin low kDa subunit; Flags: Precursor;	-2.9262	3.36371e-07	1.75177e-05	down	NPS233-1_vs_NPS233-2
Glyma.10G063800	RecName: Full=Peptidyl-prolyl cis-trans isomerase FKBP16-4, chloroplastic; Short=PPIase FKBP16-4; EC=5.2.1.8; AltName: Full=FK506-binding protein 16-4; Short=AtFKBP16-4; AltName: Full=Immunophilin FKBP16-4; AltName: Full=Rotamase; Flags: Precursor;	-2.92586	3.04978e-05	0.000791345	down	NPS233-1_vs_NPS233-2
Glyma.16G150300	RecName: Full=Xyloglucan endotransglucosylase/hydrolase protein A; EC=2.4.1.207; AltName: Full=VaXTH1; Flags: Precursor;	-2.92319	0.00292409	0.031231	down	NPS233-1_vs_NPS233-2
Glyma.01G208200	RecName: Full=Probable aquaporin TIP-type RB7-5A; AltName: Full=RT-TIP; AltName: Full=TobRB7; AltName: Full=Tonoplast intrinsic protein, root-specific RB7-5A;	-2.921	2.28578e-10	2.57012e-08	down	NPS233-1_vs_NPS233-2
Glyma.15G040000	RecName: Full=UDP-glucuronic acid decarboxylase 5; EC=4.1.1.35; AltName: Full=UDP-XYL synthase 5; AltName: Full=UDP-glucuronate decarboxylase 5; Short=UGD; Short=UXS-5;	-2.92026	1.88517e-06	7.60408e-05	down	NPS233-1_vs_NPS233-2
Glyma.07G166400	RecName: Full=Probable NAD(P)H dehydrogenase subunit CRR3, chloroplastic {ECO:0000305}; Short=Probable NDH subunit CRR3 {ECO:0000305}; AltName: Full=Protein CHLORORESPIRATORY REDUCTION 3 {ECO:0000303|PubMed:17041026}; Flags: Precursor;	-2.91921	4.14072e-05	0.00101197	down	NPS233-1_vs_NPS233-2
Glyma.20G117800	RecName: Full=Zinc finger protein GIS3 {ECO:0000305}; AltName: Full=Protein GLABROUS INFLORESCENCE STEMS 3 {ECO:0000303|PubMed:25640859};	-2.91654	0.00155849	0.0190823	down	NPS233-1_vs_NPS233-2
Glyma.14G220000	RecName: Full=Synaptotagmin-2; AltName: Full=NTMC2T1.2; AltName: Full=Synaptotagmin B;	-2.90658	5.56512e-05	0.00129414	down	NPS233-1_vs_NPS233-2
Glyma.01G104200	RecName: Full=BEL1-like homeodomain protein 9; Short=BEL1-like protein 9; AltName: Full=Protein BELLRINGER; AltName: Full=Protein LARSON; AltName: Full=Protein PENNYWISE; AltName: Full=Protein REPLUMLESS; AltName: Full=Protein VAAMANA;	-2.90649	0.00195364	0.0228192	down	NPS233-1_vs_NPS233-2
Glyma.04G082800	--	-2.90518	0.0028254	0.0305031	down	NPS233-1_vs_NPS233-2
Glyma.09G239600	RecName: Full=O-acyltransferase WSD1; AltName: Full=Diacylglycerol O-acyltransferase; Short=DGAT; EC=2.3.1.20; AltName: Full=Long-chain-alcohol O-fatty-acyltransferase; EC=2.3.1.75; AltName: Full=Wax synthase; Short=WS;	-2.90494	0.000198783	0.0036342	down	NPS233-1_vs_NPS233-2
Glyma.10G180000	RecName: Full=Auxin-induced protein 22B; AltName: Full=Indole-3-acetic acid-induced protein ARG4;	-2.90445	0.00116539	0.015037	down	NPS233-1_vs_NPS233-2
Glyma.10G236200	RecName: Full=Transmembrane ascorbate ferrireductase 1; EC=1.16.5.1; AltName: Full=Cytochrome b561; Short=Artb561-1; Short=AtCytb561; AltName: Full=Protein b561A.tha5; AltName: Full=Tonoplast Cyt-b561; Short=TCytb;	-2.90365	0.000270182	0.00467961	down	NPS233-1_vs_NPS233-2
Glyma.15G018000	RecName: Full=Photosynthetic NDH subunit of subcomplex B 3, chloroplastic {ECO:0000303|PubMed:21785130}; Short=Protein PnsB3 {ECO:0000303|PubMed:21785130}; AltName: Full=NDH-DEPENDENT CYCLIC ELECTRON FLOW 4 {ECO:0000303|PubMed:18785996}; Flags: Precursor;	-2.90303	0.00286898	0.0308247	down	NPS233-1_vs_NPS233-2
Glyma.08G274400	RecName: Full=Serine hydroxymethyltransferase, mitochondrial; Short=SHMT; EC=2.1.2.1; AltName: Full=Glycine hydroxymethyltransferase; AltName: Full=Serine methylase; Flags: Precursor;	-2.90164	0.000116147	0.00231932	down	NPS233-1_vs_NPS233-2
Glyma.16G153000	RecName: Full=Protein NDH-DEPENDENT CYCLIC ELECTRON FLOW 5 {ECO:0000305}; Flags: Precursor;	-2.89901	1.12178e-05	0.000343997	down	NPS233-1_vs_NPS233-2
Glyma.19G190200	RecName: Full=Leucine-rich repeat receptor-like protein kinase PXC1 {ECO:0000305}; AltName: Full=Protein PXY/TDR-CORRELATED 1 {ECO:0000303|PubMed:23815750}; Flags: Precursor;	-2.89886	4.7119e-05	0.00112208	down	NPS233-1_vs_NPS233-2
Glyma.13G293500	RecName: Full=Fasciclin-like arabinogalactan protein 9; Flags: Precursor;	-2.89832	0.0051491	0.0478381	down	NPS233-1_vs_NPS233-2
Glyma.14G062700	RecName: Full=LIM domain-containing protein WLIM2b {ECO:0000305}; AltName: Full=Widely-expressed LIM protein 2B {ECO:0000305};	-2.89737	0.000597658	0.00885404	down	NPS233-1_vs_NPS233-2
Glyma.12G072100	RecName: Full=Tetraspanin-3;	-2.89554	6.57691e-11	8.17348e-09	down	NPS233-1_vs_NPS233-2
Glyma.13G072800	RecName: Full=E3 ubiquitin-protein ligase RZF1 {ECO:0000303|PubMed:23415322}; EC=2.3.2.27 {ECO:0000269|PubMed:23415322}; AltName: Full=RING-H2 zinc finger protein 1 {ECO:0000303|PubMed:23415322}; Short=AtRZF1 {ECO:0000303|PubMed:23415322};	-2.89503	0.000496191	0.00762316	down	NPS233-1_vs_NPS233-2
Glyma.18G281500	RecName: Full=Probable ubiquitin-like-specific protease 2B; EC=3.4.22.-;	-2.89016	0.00131272	0.0165892	down	NPS233-1_vs_NPS233-2
Glyma.11G251500	RecName: Full=Squamosa promoter-binding-like protein 2;	-2.88051	3.58396e-05	0.000902211	down	NPS233-1_vs_NPS233-2
Glyma.08G137000	RecName: Full=PLAT domain-containing protein 2 {ECO:0000305}; Short=AtPLAT2 {ECO:0000303|PubMed:25396746}; Short=PLAT domain protein 2 {ECO:0000303|PubMed:25396746}; Flags: Precursor;	-2.87911	2.41873e-13	4.75932e-11	down	NPS233-1_vs_NPS233-2
Glyma.11G230700	RecName: Full=Protein SMAX1-LIKE 7 {ECO:0000303|PubMed:23893171}; Short=AtSMXL7 {ECO:0000303|PubMed:23893171}; AltName: Full=Protein D53-like 1 {ECO:0000303|PubMed:24336200}; Short=AtD53-like 1 {ECO:0000303|PubMed:24336200}; AltName: Full=Protein D53-like SMXL 7 {ECO:0000303|PubMed:26546446};	-2.8791	6.07085e-06	0.000205685	down	NPS233-1_vs_NPS233-2
Glyma.17G049800	RecName: Full=Auxin-binding protein ABP19a; Flags: Precursor;	-2.879	0.00114432	0.0147899	down	NPS233-1_vs_NPS233-2
Glyma.15G075200	RecName: Full=VQ motif-containing protein 4 {ECO:0000303|PubMed:22535423}; Short=AtVQ4 {ECO:0000303|PubMed:22535423}; AltName: Full=MPK3/6-targeted VQ-motif-containing protein 1 {ECO:0000303|PubMed:24750137};	-2.8702	2.66607e-05	0.000708553	down	NPS233-1_vs_NPS233-2
Glyma.10G020800	RecName: Full=BTB/POZ domain-containing protein At1g03010;	-2.86977	4.63794e-05	0.00110877	down	NPS233-1_vs_NPS233-2
Glyma.06G119300	RecName: Full=Wall-associated receptor kinase 3; EC=2.7.11.-; Flags: Precursor;	-2.86798	1.24935e-06	5.35614e-05	down	NPS233-1_vs_NPS233-2
Glyma.19G079000	--	-2.86636	0.000265518	0.00461252	down	NPS233-1_vs_NPS233-2
novel.913	--	-2.86547	4.31682e-05	0.00104502	down	NPS233-1_vs_NPS233-2
Glyma.15G170000	RecName: Full=Receptor-like serine/threonine-protein kinase ALE2; EC=2.7.11.1; AltName: Full=Protein ABNORMAL LEAF SHAPE 2; Flags: Precursor;	-2.8619	0.000188305	0.00347787	down	NPS233-1_vs_NPS233-2
Glyma.10G203000	RecName: Full=Pleiotropic drug resistance protein 2; AltName: Full=NpPDR2;	-2.85942	0.00080194	0.0111386	down	NPS233-1_vs_NPS233-2
Glyma.09G156700	RecName: Full=Peroxidase 47; Short=Atperox P47; EC=1.11.1.7; AltName: Full=ATP32; Flags: Precursor;	-2.85506	0.00104223	0.0137189	down	NPS233-1_vs_NPS233-2
Glyma.08G076400	RecName: Full=Serine decarboxylase 1; EC=4.1.1.-;	-2.8549	0.00383435	0.0382761	down	NPS233-1_vs_NPS233-2
Glyma.03G166500	RecName: Full=Acid phosphatase 1; EC=3.1.3.2; AltName: Full=Apase-1(1); Flags: Precursor;	-2.85422	0.000438626	0.00692597	down	NPS233-1_vs_NPS233-2
Glyma.12G084900	RecName: Full=Uncharacterized protein At4g22758;	-2.85415	0.00161779	0.0195915	down	NPS233-1_vs_NPS233-2
Glyma.05G053200	--	-2.84917	4.22332e-05	0.00102684	down	NPS233-1_vs_NPS233-2
Glyma.17G171100	RecName: Full=Caffeoyl-CoA O-methyltransferase; EC=2.1.1.104; AltName: Full=Trans-caffeoyl-CoA 3-O-methyltransferase; Short=CCoAMT; Short=CCoAOMT;	-2.84242	1.72088e-16	5.39021e-14	down	NPS233-1_vs_NPS233-2
Glyma.11G074100	RecName: Full=Cytochrome P450 84A1; EC=1.14.-.-; AltName: Full=Ferulate-5-hydroxylase; Short=F5H;	-2.83795	0.00511982	0.0476092	down	NPS233-1_vs_NPS233-2
Glyma.06G043400	RecName: Full=F-box protein GID2; AltName: Full=Protein SLEEPY 1;	-2.8373	2.6573e-06	0.000102731	down	NPS233-1_vs_NPS233-2
Glyma.16G004300	RecName: Full=Transcription factor TCP8;	-2.83366	3.5858e-05	0.000902211	down	NPS233-1_vs_NPS233-2
Glyma.03G205900	RecName: Full=Probable glutamate carboxypeptidase AMP1 {ECO:0000305}; EC=3.4.17.21 {ECO:0000305}; AltName: Full=Probable glutamate carboxypeptidase 2 {ECO:0000305}; AltName: Full=Probable glutamate carboxypeptidase II {ECO:0000305}; AltName: Full=Protein ALTERED MERISTEM PROGRAM 1 {ECO:0000303|PubMed:17006669}; Short=AtAMP1 {ECO:0000303|PubMed:23603279}; AltName: Full=Protein CONSTITUTIVE MORPHOG…	-2.83295	0.00217704	0.0247947	down	NPS233-1_vs_NPS233-2
Glyma.10G230600	RecName: Full=Heavy metal-associated isoprenylated plant protein 39 {ECO:0000303|PubMed:21072340, ECO:0000303|PubMed:23368984}; Short=AtHIP39 {ECO:0000303|PubMed:21072340, ECO:0000303|PubMed:23368984}; Flags: Precursor;	-2.83233	0.00366668	0.0369387	down	NPS233-1_vs_NPS233-2
Glyma.05G128400	--	-2.83177	0.00429071	0.0415744	down	NPS233-1_vs_NPS233-2
Glyma.11G075100	RecName: Full=Kinesin-like protein KIN-7G {ECO:0000305};	-2.82982	7.52324e-05	0.00163736	down	NPS233-1_vs_NPS233-2
Glyma.13G258700	RecName: Full=Root phototropism protein 3; AltName: Full=BTB/POZ domain-containing protein RPT3; AltName: Full=Non-phototropic hypocotyl protein 3;	-2.82795	0.00250003	0.0276245	down	NPS233-1_vs_NPS233-2
Glyma.10G026600	RecName: Full=Chloroplast stem-loop binding protein of 41 kDa a, chloroplastic; Short=CSP41-a; Flags: Precursor;	-2.8241	5.43281e-06	0.000186957	down	NPS233-1_vs_NPS233-2
Glyma.06G004800	--	-2.82273	3.57613e-06	0.000131622	down	NPS233-1_vs_NPS233-2
Glyma.11G067100	--	-2.8227	4.20617e-05	0.00102389	down	NPS233-1_vs_NPS233-2
Glyma.20G107800	RecName: Full=Glycerate dehydrogenase HPR, peroxisomal; Short=GDH; EC=1.1.1.29; AltName: Full=NADH-dependent hydroxypyruvate reductase 1; Short=AtHPR1; Short=HPR 1;	-2.81845	0.00171056	0.0204947	down	NPS233-1_vs_NPS233-2
Glyma.18G138300	RecName: Full=2-methylene-furan-3-one reductase; EC=1.3.1.105 {ECO:0000269|PubMed:16517758}; AltName: Full=Enone oxidoreductase; Short=SlEO; Flags: Precursor;	-2.81658	7.33471e-07	3.4426e-05	down	NPS233-1_vs_NPS233-2
Glyma.13G312900	RecName: Full=BEL1-like homeodomain protein 1; Short=BEL1-like protein 1; AltName: Full=Protein EMBRYO SAC DEVELOPMENT ARREST 29;	-2.81144	0.000137577	0.00268813	down	NPS233-1_vs_NPS233-2
Glyma.15G160700	--	-2.8087	0.000532517	0.00806933	down	NPS233-1_vs_NPS233-2
Glyma.07G240900	--	-2.80466	0.00374537	0.0375957	down	NPS233-1_vs_NPS233-2
Glyma.15G237800	RecName: Full=Annexin-like protein RJ4;	-2.80346	1.21438e-06	5.25024e-05	down	NPS233-1_vs_NPS233-2
Glyma.01G158200	RecName: Full=Serine/threonine-protein kinase AFC2; EC=2.7.12.1;	-2.80261	0.000458901	0.00718142	down	NPS233-1_vs_NPS233-2
Glyma.19G046600	RecName: Full=Ribulose bisphosphate carboxylase small chain 1, chloroplastic; Short=RuBisCO small subunit 1; EC=4.1.1.39; Flags: Precursor;	-2.79675	4.04832e-08	2.72248e-06	down	NPS233-1_vs_NPS233-2
Glyma.06G221600	RecName: Full=Reticulon-like protein B21; Short=AtRTNLB21;	-2.7953	1.08883e-06	4.76785e-05	down	NPS233-1_vs_NPS233-2
Glyma.05G194700	--	-2.79507	0.00081938	0.0113143	down	NPS233-1_vs_NPS233-2
Glyma.18G249900	RecName: Full=MDIS1-interacting receptor like kinase 2 {ECO:0000303|PubMed:26863186}; Short=AtMIK2 {ECO:0000303|PubMed:26863186}; AltName: Full=Probable LRR receptor-like serine/threonine-protein kinase At4g08850; EC=2.7.11.1 {ECO:0000305}; Flags: Precursor;	-2.79227	0.00159592	0.0194476	down	NPS233-1_vs_NPS233-2
Glyma.13G109700	RecName: Full=12-oxophytodienoate reductase 3; EC=1.3.1.42; AltName: Full=12-oxophytodienoate-10,11-reductase 3; Short=OPDA-reductase 3; AltName: Full=LeOPR3;	-2.7906	6.22182e-05	0.00141157	down	NPS233-1_vs_NPS233-2
Glyma.16G031700	RecName: Full=Probable disease resistance protein At4g27220;	-2.78995	0.00325893	0.0337731	down	NPS233-1_vs_NPS233-2
Glyma.13G220500	RecName: Full=BAG family molecular chaperone regulator 2; AltName: Full=Bcl-2-associated athanogene 2;	-2.78934	0.000458915	0.00718142	down	NPS233-1_vs_NPS233-2
Glyma.10G290700	RecName: Full=Photosynthetic NDH subunit of lumenal location 1, chloroplastic {ECO:0000303|PubMed:21785130}; AltName: Full=PsbP-like protein 2; Flags: Precursor;	-2.77931	0.0010225	0.0134938	down	NPS233-1_vs_NPS233-2
Glyma.12G085900	RecName: Full=Probable 2-carboxy-D-arabinitol-1-phosphatase {ECO:0000305}; EC=3.1.3.63 {ECO:0000250|UniProtKB:W5EP13}; Flags: Precursor;	-2.77916	0.00322462	0.0334753	down	NPS233-1_vs_NPS233-2
Glyma.08G248700	--	-2.77785	0.000127541	0.00251606	down	NPS233-1_vs_NPS233-2
Glyma.02G162800	--	-2.76836	0.00320049	0.0333138	down	NPS233-1_vs_NPS233-2
Glyma.13G108600	RecName: Full=Protein ELF4-LIKE 4;	-2.76583	0.00038331	0.00622874	down	NPS233-1_vs_NPS233-2
Glyma.20G129600	RecName: Full=Stress enhanced protein 1, chloroplastic {ECO:0000305}; Flags: Precursor;	-2.7631	0.00219715	0.0249661	down	NPS233-1_vs_NPS233-2
Glyma.14G069200	RecName: Full=Uncharacterized protein At1g66480;	-2.76259	3.45527e-05	0.000875829	down	NPS233-1_vs_NPS233-2
Glyma.01G199700	RecName: Full=Glycine cleavage system H protein, mitochondrial; Flags: Precursor;	-2.76241	1.43588e-05	0.000419769	down	NPS233-1_vs_NPS233-2
Glyma.03G080600	RecName: Full=BTB/POZ domain-containing protein At5g48800;	-2.76134	0.000904417	0.0122337	down	NPS233-1_vs_NPS233-2
Glyma.17G230500	RecName: Full=Metallothionein-like protein 1; AltName: Full=Metallothionein-like protein B; Short=MT-B;	-2.75914	1.53017e-07	8.76305e-06	down	NPS233-1_vs_NPS233-2
Glyma.04G046200	RecName: Full=LIM domain-containing protein WLIM1 {ECO:0000305}; AltName: Full=Widely-expressed LIM protein 1 {ECO:0000303|PubMed:11085265}; Short=AtWLIM1;	-2.75846	9.10476e-07	4.08596e-05	down	NPS233-1_vs_NPS233-2
Glyma.06G305000	RecName: Full=Glutamate receptor 3.4; Short=AtGLR4; AltName: Full=Ligand-gated ion channel 3.4; Flags: Precursor;	-2.75324	0.00222476	0.0251718	down	NPS233-1_vs_NPS233-2
Glyma.10G003200	RecName: Full=Chlorophyllase-2, chloroplastic; Short=AtCLH2; EC=3.1.1.14; AltName: Full=Chlorophyll-chlorophyllido hydrolase 2; Short=Chlase 2; Flags: Precursor;	-2.75144	4.0936e-05	0.00100365	down	NPS233-1_vs_NPS233-2
Glyma.08G107300	RecName: Full=Xyloglucan endotransglucosylase/hydrolase 2 {ECO:0000250|UniProtKB:Q38857}; EC=2.4.1.207 {ECO:0000250|UniProtKB:Q38857}; AltName: Full=Brassinosteroid-regulated protein BRU1 {ECO:0000303|PubMed:8115544}; Flags: Precursor;	-2.74837	0.000198468	0.00363277	down	NPS233-1_vs_NPS233-2
Glyma.07G221900	RecName: Full=Cytochrome c6, chloroplastic {ECO:0000303|PubMed:12037572}; AltName: Full=Cytochrome c-552; Short=Atc6 {ECO:0000303|PubMed:12037572}; AltName: Full=Cytochrome c-553; AltName: Full=Cytochrome c553; AltName: Full=Soluble cytochrome f; Flags: Precursor;	-2.74807	0.00199122	0.0231875	down	NPS233-1_vs_NPS233-2
Glyma.03G013400	RecName: Full=Uncharacterized protein At3g61260;	-2.7477	5.19095e-15	1.31687e-12	down	NPS233-1_vs_NPS233-2
Glyma.15G102000	RecName: Full=Glutamine synthetase leaf isozyme, chloroplastic; EC=6.3.1.2; AltName: Full=Glutamate--ammonia ligase; AltName: Full=Isozyme delta; Flags: Precursor;	-2.74736	5.27573e-08	3.44561e-06	down	NPS233-1_vs_NPS233-2
Glyma.19G224400	RecName: Full=Protein NRT1/ PTR FAMILY 4.6; Short=AtNPF4.6; AltName: Full=Nitrate transporter 1.2; AltName: Full=Nitrate transporter NTL1; AltName: Full=Protein ABA-IMPORTING TRANSPORTER 1;	-2.74543	3.79344e-05	0.000943627	down	NPS233-1_vs_NPS233-2
Glyma.10G155400	RecName: Full=Amidase 1 {ECO:0000303|PubMed:16738862}; Short=AtAMI1 {ECO:0000303|PubMed:12620340}; EC=3.5.1.4 {ECO:0000269|PubMed:12620340, ECO:0000269|PubMed:17555521, ECO:0000269|PubMed:27135507}; AltName: Full=Translocon at the outer membrane of chloroplasts 64-I {ECO:0000305}; Short=AtTOC64-I {ECO:0000303|PubMed:14741350};	-2.74406	2.79694e-05	0.000738854	down	NPS233-1_vs_NPS233-2
Glyma.06G102700	RecName: Full=Dynein regulatory complex subunit 3; AltName: Full=Flagellar-associated protein 134;	-2.74353	0.000118163	0.00234918	down	NPS233-1_vs_NPS233-2
Glyma.09G165300	RecName: Full=Inactive protein RESTRICTED TEV MOVEMENT 2; AltName: Full=Inactive restricted tobacco etch virus movement protein 2;	-2.74289	0.00202644	0.0234465	down	NPS233-1_vs_NPS233-2
Glyma.02G034700	RecName: Full=Polygalacturonase 1 beta-like protein 3 {ECO:0000303|PubMed:26106400}; Short=AtPGL3 {ECO:0000303|PubMed:26106400}; AltName: Full=Aromatic-rich glycoprotein JP650; AltName: Full=PG1beta-like protein 3 {ECO:0000303|PubMed:26106400}; AltName: Full=Polygalacturonase 2 {ECO:0000303|PubMed:19639386}; AltName: Full=Probable polygalacturonase non-catalytic subunit JP650; Flags: Precursor;	-2.74149	4.05893e-06	0.00014658	down	NPS233-1_vs_NPS233-2
Glyma.16G214800	RecName: Full=TMV resistance protein N;	-2.74	0.000203874	0.00370523	down	NPS233-1_vs_NPS233-2
Glyma.13G371800	--	-2.73867	1.54594e-06	6.3697e-05	down	NPS233-1_vs_NPS233-2
Glyma.02G096700	--	-2.73758	8.59083e-08	5.23223e-06	down	NPS233-1_vs_NPS233-2
Glyma.13G336600	RecName: Full=Expansin-A4; Short=AtEXPA4; AltName: Full=Alpha-expansin-4; Short=At-EXP4; Short=AtEx4; AltName: Full=Ath-ExpAlpha-1.6; Flags: Precursor;	-2.73305	4.04401e-06	0.000146213	down	NPS233-1_vs_NPS233-2
Glyma.09G173400	RecName: Full=Nudix hydrolase 4; Short=AtNUDT4; EC=3.6.1.-; AltName: Full=ADP-ribose pyrophosphatase; EC=3.6.1.13; AltName: Full=NADH pyrophosphatase; EC=3.6.1.22;	-2.7291	4.48063e-06	0.000158089	down	NPS233-1_vs_NPS233-2
Glyma.04G035900	--	-2.72829	5.33259e-07	2.60237e-05	down	NPS233-1_vs_NPS233-2
Glyma.19G092100	RecName: Full=Protein NUCLEAR FUSION DEFECTIVE 4 {ECO:0000303|PubMed:16698901};	-2.72525	0.00151072	0.018579	down	NPS233-1_vs_NPS233-2
Glyma.08G244700	RecName: Full=UDP-glycosyltransferase 83A1; EC=2.4.1.-;	-2.72481	0.0039297	0.0389997	down	NPS233-1_vs_NPS233-2
Glyma.12G024100	--	-2.72066	7.4206e-05	0.00162008	down	NPS233-1_vs_NPS233-2
Glyma.08G061200	RecName: Full=NAD(P)H dehydrogenase (quinone) FQR1 {ECO:0000305}; EC=1.6.5.2 {ECO:0000269|PubMed:11842161}; AltName: Full=Flavodoxin-like quinone reductase 1 {ECO:0000303|PubMed:11842161};	-2.71768	3.64337e-06	0.000133457	down	NPS233-1_vs_NPS233-2
Glyma.10G144100	RecName: Full=PLASMODESMATA CALLOSE-BINDING PROTEIN 5; Short=AtPDCB5; AltName: Full=Glucan endo-1,3-beta-glucosidase-like protein 1; Flags: Precursor;	-2.71595	5.86198e-05	0.00134887	down	NPS233-1_vs_NPS233-2
Glyma.06G131800	RecName: Full=Oligopeptide transporter 6; Short=AtOPT6;	-2.71487	0.00277962	0.0301176	down	NPS233-1_vs_NPS233-2
Glyma.17G227700	RecName: Full=Glutaredoxin-C6; Short=AtGrxC6; AltName: Full=Protein ROXY 21;	-2.71376	9.91855e-06	0.000310991	down	NPS233-1_vs_NPS233-2
Glyma.12G190500	RecName: Full=Protein YABBY 2; AltName: Full=OsYABBY2; Short=OsYAB2; AltName: Full=Protein FILAMENTOUS FLOWER 2;	-2.71038	0.00406433	0.0399484	down	NPS233-1_vs_NPS233-2
Glyma.02G113800	--	-2.69999	4.55388e-05	0.00109208	down	NPS233-1_vs_NPS233-2
Glyma.07G136000	RecName: Full=Tropinone reductase homolog; EC=1.1.1.-; AltName: Full=P29X;	-2.69874	1.7636e-05	0.000498944	down	NPS233-1_vs_NPS233-2
Glyma.08G163400	--	-2.69809	0.0021546	0.0245996	down	NPS233-1_vs_NPS233-2
Glyma.20G021000	RecName: Full=Protein PHLOEM PROTEIN 2-LIKE A1; Short=AtPP2-A1;	-2.69642	0.000455929	0.00715135	down	NPS233-1_vs_NPS233-2
Glyma.20G217000	RecName: Full=Protein yippee-like At4g27745;	-2.69156	0.00413245	0.0404367	down	NPS233-1_vs_NPS233-2
Glyma.15G263800	--	-2.68889	0.00517708	0.0480543	down	NPS233-1_vs_NPS233-2
Glyma.14G000700	--	-2.68532	5.91816e-08	3.75338e-06	down	NPS233-1_vs_NPS233-2
Glyma.04G015400	RecName: Full=Peptidyl-prolyl cis-trans isomerase FKBP18, chloroplastic; Short=PPIase FKBP18; EC=5.2.1.8; AltName: Full=FK506-binding protein 18; Short=AtFKBP18; AltName: Full=Immunophilin FKBP18; AltName: Full=Rotamase; Flags: Precursor;	-2.67109	0.00069898	0.0100496	down	NPS233-1_vs_NPS233-2
Glyma.06G295200	RecName: Full=Probable polyol transporter 4;	-2.67092	0.00540054	0.0495739	down	NPS233-1_vs_NPS233-2
Glyma.03G164300	RecName: Full=Probable methyltransferase PMT8; EC=2.1.1.-;	-2.66741	0.000421025	0.0067144	down	NPS233-1_vs_NPS233-2
Glyma.05G236600	RecName: Full=Pectinesterase inhibitor 7 {ECO:0000305}; AltName: Full=Pectin methylesterase inhibitor 7 {ECO:0000303|PubMed:26183897}; Short=AtPMEI7 {ECO:0000303|PubMed:26183897}; Flags: Precursor;	-2.66719	0.000457196	0.00716756	down	NPS233-1_vs_NPS233-2
Glyma.15G022800	RecName: Full=Dof zinc finger protein DOF1.7; Short=AtDOF1.7;	-2.66318	0.00499305	0.0467552	down	NPS233-1_vs_NPS233-2
Glyma.18G014900	RecName: Full=Homeobox-leucine zipper protein ATHB-6; AltName: Full=HD-ZIP protein ATHB-6; AltName: Full=Homeodomain transcription factor ATHB-6;	-2.65697	1.6914e-09	1.63783e-07	down	NPS233-1_vs_NPS233-2
Glyma.07G003800	RecName: Full=Probable xyloglucan glycosyltransferase 5; EC=2.4.1.-; AltName: Full=Cellulose synthase-like protein C5; Short=AtCslC5;	-2.6561	0.00391065	0.0388483	down	NPS233-1_vs_NPS233-2
Glyma.08G321100	RecName: Full=Aspartyl protease family protein At5g10770; EC=3.4.23.- {ECO:0000305}; Flags: Precursor;	-2.65325	6.73838e-05	0.00150103	down	NPS233-1_vs_NPS233-2
Glyma.14G004200	RecName: Full=Fasciclin-like arabinogalactan protein 2; Flags: Precursor;	-2.65267	7.99524e-17	2.63894e-14	down	NPS233-1_vs_NPS233-2
Glyma.04G062000	RecName: Full=U-box domain-containing protein 13; EC=2.3.2.27; AltName: Full=Plant U-box protein 13; AltName: Full=RING-type E3 ubiquitin transferase PUB13 {ECO:0000305};	-2.65044	5.13301e-05	0.00120645	down	NPS233-1_vs_NPS233-2
Glyma.13G237500	RecName: Full=Dof zinc finger protein DOF1.4; Short=AtDOF1.4;	-2.64971	0.00258774	0.0283792	down	NPS233-1_vs_NPS233-2
Glyma.10G089500	RecName: Full=Photosystem II 5 kDa protein, chloroplastic; Short=PSII-T; AltName: Full=Light-regulated unknown 11 kDa protein; Flags: Precursor;	-2.64197	2.16694e-09	2.02178e-07	down	NPS233-1_vs_NPS233-2
Glyma.08G022300	RecName: Full=Endoglucanase 6; EC=3.2.1.4; AltName: Full=Endo-1,4-beta glucanase 6; Flags: Precursor;	-2.64055	2.26115e-13	4.47795e-11	down	NPS233-1_vs_NPS233-2
Glyma.07G162900	RecName: Full=Allene oxide synthase 3 {ECO:0000303|PubMed:12351632}; Short=LeAOS3 {ECO:0000303|PubMed:12351632}; EC=4.2.1.92 {ECO:0000269|PubMed:12351632}; AltName: Full=Allene oxide cyclase {ECO:0000303|PubMed:12351632}; EC=5.3.99.6 {ECO:0000269|PubMed:12351632}; AltName: Full=Cytochrome P450 CYP74C3 {ECO:0000303|PubMed:12351632}; AltName: Full=Cytochrome P450 CYP74D1 {ECO:0000303|PubMed:1707379…	-2.63888	2.77812e-08	1.94253e-06	down	NPS233-1_vs_NPS233-2
Glyma.08G342000	RecName: Full=Trypsin inhibitor A; AltName: Full=Kunitz-type trypsin inhibitor A; Flags: Precursor;	-2.63808	0.000525742	0.00797853	down	NPS233-1_vs_NPS233-2
Glyma.15G065600	RecName: Full=Beta-amyrin synthase; EC=5.4.99.39;	-2.63729	0.0034048	0.0349194	down	NPS233-1_vs_NPS233-2
Glyma.06G123700	RecName: Full=Pathogen-related protein;	-2.63523	0.00177822	0.0211896	down	NPS233-1_vs_NPS233-2
Glyma.04G161600	--	-2.63491	0.000789703	0.0110035	down	NPS233-1_vs_NPS233-2
Glyma.10G000500	RecName: Full=Protein SIEVE ELEMENT OCCLUSION B {ECO:0000303|PubMed:20932300}; Short=AtSEOb {ECO:0000303|PubMed:20932300}; AltName: Full=Protein SIEVE ELEMENT OCCLUSION-RELATED 1 {ECO:0000303|PubMed:22470058}; Short=AtSEOR1 {ECO:0000303|PubMed:22470058};	-2.63383	0.000359525	0.00593971	down	NPS233-1_vs_NPS233-2
Glyma.09G073900	--	-2.62768	3.68753e-06	0.000134914	down	NPS233-1_vs_NPS233-2
Glyma.05G136600	RecName: Full=Protein XRI1; AltName: Full=Protein X-RAY INDUCED 1;	-2.62623	0.00352211	0.0358708	down	NPS233-1_vs_NPS233-2
Glyma.12G059600	RecName: Full=Protein plastid transcriptionally active 16, chloroplastic {ECO:0000303|PubMed:16326926}; Short=pTAC16 {ECO:0000303|PubMed:16326926}; Flags: Precursor;	-2.62284	0.000100938	0.00207807	down	NPS233-1_vs_NPS233-2
Glyma.18G021300	RecName: Full=WEB family protein At2g40480;	-2.62022	5.37461e-07	2.61871e-05	down	NPS233-1_vs_NPS233-2
Glyma.04G156200	RecName: Full=Protein TSS {ECO:0000303|PubMed:21185286}; AltName: Full=TPR-domain suppressor of STIMPY {ECO:0000303|PubMed:21185286};	-2.61877	3.57152e-05	0.000900093	down	NPS233-1_vs_NPS233-2
Glyma.16G189000	--	-2.61861	0.000518555	0.00789789	down	NPS233-1_vs_NPS233-2
Glyma.18G285800	RecName: Full=NAD(P)H-dependent 6'-deoxychalcone synthase; EC=2.3.1.170;	-2.61079	0.0015634	0.0191195	down	NPS233-1_vs_NPS233-2
Glyma.20G188000	RecName: Full=Cytochrome P450 77A3; EC=1.14.-.-;	-2.60999	0.000644749	0.00941095	down	NPS233-1_vs_NPS233-2
Glyma.09G028000	RecName: Full=Alpha-glucosidase; EC=3.2.1.20; AltName: Full=Maltase; Flags: Precursor;	-2.60851	0.000213547	0.00385138	down	NPS233-1_vs_NPS233-2
Glyma.17G234700	RecName: Full=LIM domain-containing protein WLIM1 {ECO:0000305}; AltName: Full=Widely-expressed LIM protein 1 {ECO:0000303|PubMed:11085265}; Short=AtWLIM1;	-2.60412	3.5822e-06	0.000131688	down	NPS233-1_vs_NPS233-2
Glyma.17G094400	RecName: Full=Transcription factor MYB1R1; AltName: Full=Myb-related protein R1 {ECO:0000303|PubMed:21030505}; Short=StMYB1R-1 {ECO:0000303|PubMed:21030505};	-2.60124	3.99309e-08	2.69389e-06	down	NPS233-1_vs_NPS233-2
Glyma.06G093600	RecName: Full=Aspartyl protease AED3 {ECO:0000303|PubMed:24755512}; EC=3.4.23.- {ECO:0000305}; AltName: Full=Apoplastic EDS1-dependent protein 3 {ECO:0000303|PubMed:24755512}; Flags: Precursor;	-2.6009	4.81829e-11	6.13702e-09	down	NPS233-1_vs_NPS233-2
Glyma.15G272800	--	-2.59789	0.00301365	0.031943	down	NPS233-1_vs_NPS233-2
Glyma.04G017300	--	-2.59683	3.25895e-06	0.00012111	down	NPS233-1_vs_NPS233-2
Glyma.14G057400	RecName: Full=Inactive receptor-like serine/threonine-protein kinase At2g40270; Flags: Precursor;	-2.59588	0.000192277	0.00354058	down	NPS233-1_vs_NPS233-2
Glyma.16G008600	RecName: Full=Flavonoid 3'-monooxygenase; EC=1.14.13.21; AltName: Full=Cytochrome P450 75B1; AltName: Full=Flavonoid 3'-hydroxylase; Short=AtF3'H; AltName: Full=Protein TRANSPARENT TESTA 7;	-2.5833	0.000358376	0.00592391	down	NPS233-1_vs_NPS233-2
Glyma.07G273000	--	-2.58073	0.00109282	0.0142685	down	NPS233-1_vs_NPS233-2
Glyma.06G030000	RecName: Full=Phosphatidylinositol/phosphatidylcholine transfer protein SFH8; AltName: Full=Protein SEC FOURTEEN HOMOLOGS 8; Short=AtSFH8;	-2.57934	0.000349864	0.00580824	down	NPS233-1_vs_NPS233-2
novel.1119	RecName: Full=Protein ALP1-like {ECO:0000305}; EC=3.1.-.-;	-2.5777	0.00260567	0.0285351	down	NPS233-1_vs_NPS233-2
Glyma.06G219900	RecName: Full=Trypsin inhibitor A; AltName: Full=Kunitz-type trypsin inhibitor A; Flags: Precursor;	-2.57023	2.55878e-05	0.000684782	down	NPS233-1_vs_NPS233-2
Glyma.09G081800	RecName: Full=Probable receptor-like protein kinase At5g18500; EC=2.7.11.1;	-2.56917	3.12915e-06	0.000117137	down	NPS233-1_vs_NPS233-2
Glyma.03G158700	RecName: Full=Auxin-induced protein AUX28;	-2.56879	0.000128888	0.00253774	down	NPS233-1_vs_NPS233-2
Glyma.09G266800	--	-2.56661	0.00329876	0.0341199	down	NPS233-1_vs_NPS233-2
Glyma.18G207200	--	-2.56506	3.2975e-05	0.000842097	down	NPS233-1_vs_NPS233-2
Glyma.07G004200	RecName: Full=Protein MANNAN SYNTHESIS-RELATED 1 {ECO:0000303|PubMed:22966747}; Short=AtMSR1 {ECO:0000303|PubMed:22966747}; EC=2.4.1.- {ECO:0000305}; AltName: Full=O-fucosyltransferase 25 {ECO:0000305}; Short=O-FucT-25 {ECO:0000305}; AltName: Full=O-fucosyltransferase family protein {ECO:0000312|EMBL:ARJ31429.1};	-2.56505	9.40966e-07	4.19824e-05	down	NPS233-1_vs_NPS233-2
Glyma.04G014500	RecName: Full=PsbP domain-containing protein 3, chloroplastic; AltName: Full=OEC23-like protein 2; Flags: Precursor;	-2.56498	0.000197788	0.00362466	down	NPS233-1_vs_NPS233-2
Glyma.07G132000	RecName: Full=Metallothionein-like protein 2; Short=MT-2;	-2.5629	3.0537e-05	0.000791691	down	NPS233-1_vs_NPS233-2
Glyma.08G319200	--	-2.56121	0.000112826	0.00226805	down	NPS233-1_vs_NPS233-2
Glyma.12G233500	RecName: Full=Protein trichome birefringence-like 42;	-2.55969	0.000467445	0.00729101	down	NPS233-1_vs_NPS233-2
Glyma.05G085000	RecName: Full=Cyclin-dependent kinase inhibitor 7; AltName: Full=Inhibitor/interactor of CDK protein 5; AltName: Full=KIP-related protein 7;	-2.5595	6.48535e-05	0.00145949	down	NPS233-1_vs_NPS233-2
Glyma.13G357500	RecName: Full=Dynein 8 kDa light chain, flagellar outer arm;	-2.55853	0.000236385	0.00418459	down	NPS233-1_vs_NPS233-2
Glyma.19G032500	--	-2.55723	2.54799e-08	1.81469e-06	down	NPS233-1_vs_NPS233-2
novel.995	RecName: Full=Early nodulin-36A; Short=N-36A;	-2.5564	2.20232e-07	1.19018e-05	down	NPS233-1_vs_NPS233-2
Glyma.06G306000	RecName: Full=Probable beta-1,3-galactosyltransferase 2; EC=2.4.1.-;	-2.55433	1.23994e-05	0.000372419	down	NPS233-1_vs_NPS233-2
Glyma.02G104900	RecName: Full=Scopoletin glucosyltransferase; EC=2.4.1.128; AltName: Full=Phenylpropanoid:glucosyltransferase 1;	-2.55315	0.00461656	0.0439956	down	NPS233-1_vs_NPS233-2
Glyma.18G151400	RecName: Full=Transcription factor AS1 {ECO:0000303|PubMed:11140682}; AltName: Full=Myb-related protein 91 {ECO:0000303|PubMed:9839469}; Short=AtMYB91 {ECO:0000303|PubMed:9839469}; AltName: Full=Protein ASYMMETRIC LEAVES 1 {ECO:0000303|PubMed:11140682}; AltName: Full=Protein PHANTASTICA {ECO:0000303|PubMed:10102816}; Short=AtPHAN {ECO:0000303|PubMed:10102816};	-2.55185	0.00483326	0.0455656	down	NPS233-1_vs_NPS233-2
Glyma.06G224200	RecName: Full=Thylakoid lumenal 16.5 kDa protein, chloroplastic; Flags: Precursor;	-2.54959	2.60139e-05	0.000694972	down	NPS233-1_vs_NPS233-2
Glyma.04G203200	RecName: Full=Respiratory burst oxidase homolog protein C; EC=1.11.1.-; EC=1.6.3.-; AltName: Full=NADPH oxidase RBOHC; AltName: Full=StRBOHC;	-2.54164	3.48483e-05	0.000882594	down	NPS233-1_vs_NPS233-2
Glyma.06G221100	RecName: Full=Protein PHLOEM PROTEIN 2-LIKE A9; Short=AtPP2-A9;	-2.53507	6.67424e-05	0.00149107	down	NPS233-1_vs_NPS233-2
Glyma.09G079900	RecName: Full=Aspartic proteinase A1; EC=3.4.23.-; Flags: Precursor;	-2.53489	0.00538049	0.0494638	down	NPS233-1_vs_NPS233-2
Glyma.04G104300	RecName: Full=Phosphatidylinositol/phosphatidylcholine transfer protein SFH1; AltName: Full=Phosphatidylinositol transfer protein 1; Short=AtPITP1; AltName: Full=Protein CAN OF WORMS1; AltName: Full=Protein SEC FOURTEEN HOMOLOGS 1; Short=AtSFH1; AltName: Full=Protein SHORT ROOT HAIR 1;	-2.53462	0.000717071	0.0102378	down	NPS233-1_vs_NPS233-2
Glyma.05G026900	RecName: Full=Mini zinc finger protein 3; Short=AtMIF3;	-2.53458	0.00242063	0.0268924	down	NPS233-1_vs_NPS233-2
Glyma.08G343900	RecName: Full=Uncharacterized protein At5g01610;	-2.53344	3.12594e-11	4.17191e-09	down	NPS233-1_vs_NPS233-2
Glyma.15G018400	RecName: Full=Dehydration-responsive element-binding protein 3; AltName: Full=Protein TINY 2;	-2.52983	0.0020894	0.0240842	down	NPS233-1_vs_NPS233-2
Glyma.08G126000	RecName: Full=Integrin-linked protein kinase 1 {ECO:0000303|PubMed:27208244}; EC=2.7.11.1 {ECO:0000269|PubMed:27208244}; AltName: Full=Ankyrin protein kinase 1 {ECO:0000303|PubMed:12650621};	-2.52881	0.00414719	0.0405292	down	NPS233-1_vs_NPS233-2
Glyma.20G152000	RecName: Full=Xyloglucan galactosyltransferase XLT2 {ECO:0000305}; EC=2.4.1.- {ECO:0000305}; AltName: Full=Glycosyltransferase 18 {ECO:0000303|PubMed:15020758}; Short=AtGT18 {ECO:0000303|PubMed:15020758}; AltName: Full=Protein XYLOGLUCAN L-SIDE CHAIN GALACTOSYLTRANSFERASE POSITION 2 {ECO:0000303|PubMed:22474179};	-2.52683	0.000307936	0.0052339	down	NPS233-1_vs_NPS233-2
Glyma.02G193800	RecName: Full=Uncharacterized protein At5g39865;	-2.52173	0.00292105	0.0312202	down	NPS233-1_vs_NPS233-2
Glyma.18G226600	--	-2.51664	0.00314114	0.0329193	down	NPS233-1_vs_NPS233-2
Glyma.06G205400	RecName: Full=Protein COBRA; AltName: Full=Cell expansion protein; Flags: Precursor;	-2.51525	3.52716e-07	1.82125e-05	down	NPS233-1_vs_NPS233-2
Glyma.17G091000	RecName: Full=Aldehyde dehydrogenase family 2 member B4, mitochondrial; Short=ALDH2a; EC=1.2.1.3; Flags: Precursor;	-2.51445	5.37895e-08	3.49736e-06	down	NPS233-1_vs_NPS233-2
Glyma.16G207800	RecName: Full=4,5-DOPA dioxygenase extradiol; EC=1.13.11.29;	-2.51443	0.000510018	0.00779238	down	NPS233-1_vs_NPS233-2
Glyma.13G046200	RecName: Full=Ribulose bisphosphate carboxylase small chain 1, chloroplastic; Short=RuBisCO small subunit 1; EC=4.1.1.39; Flags: Precursor;	-2.51303	2.26335e-07	1.21461e-05	down	NPS233-1_vs_NPS233-2
Glyma.07G064900	--	-2.51014	5.15405e-07	2.53476e-05	down	NPS233-1_vs_NPS233-2
Glyma.02G237800	RecName: Full=KH domain-containing protein At2g38610; AltName: Full=Quaking-like protein 3;	-2.50336	1.01305e-05	0.000316989	down	NPS233-1_vs_NPS233-2
Glyma.03G179900	RecName: Full=Fasciclin-like arabinogalactan protein 11; Flags: Precursor;	-2.4951	0.00442505	0.0426463	down	NPS233-1_vs_NPS233-2
Glyma.16G079500	--	-2.49507	0.00162886	0.0197081	down	NPS233-1_vs_NPS233-2
Glyma.01G204200	RecName: Full=Serine/threonine-protein kinase SRK2A {ECO:0000303|PubMed:27268428}; EC=2.7.11.1 {ECO:0000269|PubMed:27268428}; AltName: Full=SNF1-related kinase 2A {ECO:0000305}; Short=PpSnRK2A {ECO:0000303|PubMed:27268428};	-2.4928	2.12487e-07	1.15852e-05	down	NPS233-1_vs_NPS233-2
Glyma.20G066100	RecName: Full=B2 protein;	-2.49231	0.00211123	0.0242721	down	NPS233-1_vs_NPS233-2
Glyma.20G210100	RecName: Full=Basic 7S globulin; AltName: Full=SBg7S; Short=Bg; Contains: RecName: Full=Basic 7S globulin high kDa subunit; Contains: RecName: Full=Basic 7S globulin low kDa subunit; Flags: Precursor;	-2.48881	7.57898e-06	0.000247231	down	NPS233-1_vs_NPS233-2
Glyma.07G241000	--	-2.48217	0.000702404	0.0100729	down	NPS233-1_vs_NPS233-2
Glyma.09G256800	RecName: Full=E3 ubiquitin-protein ligase RHA1B {ECO:0000305}; EC=2.3.2.27; AltName: Full=RING-H2 finger A1b {ECO:0000303|PubMed:9781696}; AltName: Full=RING-H2 zinc finger protein RHA1b {ECO:0000305}; AltName: Full=RING-type E3 ubiquitin transferase RHA1B {ECO:0000305};	-2.48141	0.00274185	0.0298137	down	NPS233-1_vs_NPS233-2
Glyma.10G066700	RecName: Full=Fructose-bisphosphate aldolase 6, cytosolic {ECO:0000305}; Short=AtFBA6 {ECO:0000303|PubMed:22561114}; EC=4.1.2.13 {ECO:0000269|PubMed:21782461}; AltName: Full=Cytosolic aldolase 2 {ECO:0000303|PubMed:21782461}; Short=cAld2 {ECO:0000303|PubMed:21782461};	-2.47733	0.00122396	0.0156806	down	NPS233-1_vs_NPS233-2
Glyma.11G135900	RecName: Full=Protein plastid transcriptionally active 16, chloroplastic {ECO:0000303|PubMed:16326926}; Short=pTAC16 {ECO:0000303|PubMed:16326926}; Flags: Precursor;	-2.47125	3.2787e-05	0.000837994	down	NPS233-1_vs_NPS233-2
Glyma.09G230300	RecName: Full=Leucine-rich repeat receptor-like protein kinase TDR; EC=2.7.11.1; AltName: Full=Protein PHLOEM INTERCALATED WITH XYLEM {ECO:0000303|PubMed:17570668}; AltName: Full=Tracheary element differentiation inhibitory factor receptor {ECO:0000303|PubMed:18812507}; Short=AtTDR {ECO:0000303|PubMed:18812507}; Short=TDIF receptor {ECO:0000303|PubMed:18812507}; Flags: Precursor;	-2.46886	1.78056e-06	7.21058e-05	down	NPS233-1_vs_NPS233-2
Glyma.11G043400	--	-2.46805	0.000113368	0.00227745	down	NPS233-1_vs_NPS233-2
Glyma.13G129500	RecName: Full=Photosystem I reaction center subunit IV A, chloroplastic; Short=PSI-E A; Contains: RecName: Full=Photosystem I reaction center subunit IV A isoform 2; Flags: Precursor;	-2.46696	3.09694e-05	0.000800874	down	NPS233-1_vs_NPS233-2
Glyma.19G254500	RecName: Full=Hydroquinone glucosyltransferase; EC=2.4.1.218; AltName: Full=Arbutin synthase;	-2.46592	1.50316e-06	6.22105e-05	down	NPS233-1_vs_NPS233-2
Glyma.15G168200	RecName: Full=Probable WRKY transcription factor 11; AltName: Full=WRKY DNA-binding protein 11;	-2.46121	3.62095e-05	0.000908473	down	NPS233-1_vs_NPS233-2
Glyma.18G209800	RecName: Full=Protein LURP-one-related 15;	-2.4605	5.11486e-07	2.52015e-05	down	NPS233-1_vs_NPS233-2
Glyma.01G108700	--	-2.46004	0.000501305	0.00768133	down	NPS233-1_vs_NPS233-2
Glyma.11G168100	--	-2.45708	0.000635414	0.00930123	down	NPS233-1_vs_NPS233-2
Glyma.14G095900	RecName: Full=Protein indeterminate-domain 2 {ECO:0000303|PubMed:16784536};	-2.45684	0.000150438	0.00286492	down	NPS233-1_vs_NPS233-2
Glyma.16G127300	RecName: Full=Ferredoxin--NADP reductase, leaf isozyme, chloroplastic; Short=FNR; EC=1.18.1.2; Flags: Precursor;	-2.45481	1.62431e-11	2.22589e-09	down	NPS233-1_vs_NPS233-2
Glyma.11G062200	RecName: Full=BTB/POZ domain-containing protein At3g50780;	-2.45292	0.000831769	0.0114391	down	NPS233-1_vs_NPS233-2
Glyma.17G059800	RecName: Full=Subtilisin-like protease SBT2.6 {ECO:0000303|PubMed:16193095}; EC=3.4.21.- {ECO:0000255|PROSITE-ProRule:PRU10082}; AltName: Full=Subtilase subfamily 2 member 6 {ECO:0000303|PubMed:16193095}; Short=AtSBT2.6 {ECO:0000303|PubMed:16193095}; Flags: Precursor;	-2.45272	4.02927e-06	0.000145852	down	NPS233-1_vs_NPS233-2
Glyma.04G177300	RecName: Full=Transcription factor MYB1R1; AltName: Full=Myb-related protein R1 {ECO:0000303|PubMed:21030505}; Short=StMYB1R-1 {ECO:0000303|PubMed:21030505};	-2.45189	1.86602e-09	1.77336e-07	down	NPS233-1_vs_NPS233-2
Glyma.13G210800	RecName: Full=Glutamine synthetase leaf isozyme, chloroplastic; EC=6.3.1.2; AltName: Full=Glutamate--ammonia ligase; AltName: Full=Isozyme delta; Flags: Precursor;	-2.45044	1.50379e-06	6.22105e-05	down	NPS233-1_vs_NPS233-2
Glyma.11G088600	RecName: Full=Protein PIN-LIKES 3 {ECO:0000303|PubMed:22504182}; AltName: Full=Auxin efflux carrier-like protein 3 {ECO:0000303|PubMed:22504182};	-2.45015	6.7456e-05	0.00150154	down	NPS233-1_vs_NPS233-2
Glyma.13G255900	RecName: Full=Gamma-glutamyl peptidase 5 {ECO:0000305}; EC=3.4.19.- {ECO:0000305};	-2.44843	5.21836e-07	2.55331e-05	down	NPS233-1_vs_NPS233-2
Glyma.19G118700	--	-2.44566	0.000195256	0.00358682	down	NPS233-1_vs_NPS233-2
Glyma.10G249000	RecName: Full=Photosystem I reaction center subunit II, chloroplastic; AltName: Full=PS I subunit 5; AltName: Full=Photosystem I 20 kDa subunit; Short=PSI-D; Flags: Precursor;	-2.44144	1.4593e-06	6.10215e-05	down	NPS233-1_vs_NPS233-2
Glyma.20G128600	RecName: Full=Probable cinnamyl alcohol dehydrogenase; Short=CAD; EC=1.1.1.195;	-2.43945	0.00207735	0.0239543	down	NPS233-1_vs_NPS233-2
Glyma.09G211600	RecName: Full=Bifunctional pinoresinol-lariciresinol reductase 2; Short=PLR-Lu2; AltName: Full=(+)-lariciresinol reductase; EC=1.23.1.2; AltName: Full=(+)-pinoresinol reductase; EC=1.23.1.1;	-2.43773	0.000623603	0.00915782	down	NPS233-1_vs_NPS233-2
Glyma.18G220900	RecName: Full=AT-hook motif nuclear-localized protein 1 {ECO:0000303|PubMed:15604740};	-2.43636	2.76985e-06	0.000106146	down	NPS233-1_vs_NPS233-2
Glyma.07G055800	RecName: Full=Cytochrome b561 and DOMON domain-containing protein At3g61750; AltName: Full=Protein b561A.tha9; Flags: Precursor;	-2.4341	0.00396691	0.039247	down	NPS233-1_vs_NPS233-2
Glyma.12G048900	--	-2.4319	0.00169846	0.0203657	down	NPS233-1_vs_NPS233-2
Glyma.06G088200	RecName: Full=Amino acid permease 1; AltName: Full=Amino acid transporter AAP1; AltName: Full=Neutral amino acid transporter II;	-2.42622	0.00417104	0.0406716	down	NPS233-1_vs_NPS233-2
Glyma.07G163600	RecName: Full=Cytochrome b6-f complex subunit 7; AltName: Full=Cytochrome b6-f complex subunit PetM; AltName: Full=Cytochrome b6-f complex subunit VII; Flags: Fragment;	-2.42594	1.25637e-06	5.37682e-05	down	NPS233-1_vs_NPS233-2
Glyma.06G153400	RecName: Full=NAD(P)H-quinone oxidoreductase subunit O, chloroplastic {ECO:0000305}; EC=1.6.5.- {ECO:0000305}; AltName: Full=NAD(P)H dehydrogenase subunit O {ECO:0000303|PubMed:21785130}; Short=NDH subunit O {ECO:0000305}; Short=NDH-O {ECO:0000303|PubMed:15608332}; AltName: Full=NADH-plastoquinone oxidoreductase subunit O {ECO:0000305}; Flags: Precursor;	-2.42331	1.76985e-05	0.000499793	down	NPS233-1_vs_NPS233-2
Glyma.08G072300	RecName: Full=Ubiquinol oxidase 2, mitochondrial; EC=1.10.3.11; AltName: Full=Alternative oxidase 2; Flags: Precursor;	-2.42249	0.00214355	0.0245059	down	NPS233-1_vs_NPS233-2
Glyma.17G050800	RecName: Full=Protein ELF4-LIKE 4;	-2.42233	8.1059e-06	0.000260816	down	NPS233-1_vs_NPS233-2
Glyma.14G127800	RecName: Full=Pleiotropic drug resistance protein 1; AltName: Full=NtPDR1;	-2.41341	0.00224732	0.0253708	down	NPS233-1_vs_NPS233-2
Glyma.15G015800	--	-2.41271	2.44135e-08	1.75503e-06	down	NPS233-1_vs_NPS233-2
Glyma.02G244000	RecName: Full=Glutamine synthetase cytosolic isozyme 2; EC=6.3.1.2; AltName: Full=GS1-2; AltName: Full=Glutamate--ammonia ligase;	-2.41015	8.19332e-05	0.00175753	down	NPS233-1_vs_NPS233-2
Glyma.12G006300	RecName: Full=Leucine-rich repeat receptor-like protein kinase TDR; EC=2.7.11.1; AltName: Full=Protein PHLOEM INTERCALATED WITH XYLEM {ECO:0000303|PubMed:17570668}; AltName: Full=Tracheary element differentiation inhibitory factor receptor {ECO:0000303|PubMed:18812507}; Short=AtTDR {ECO:0000303|PubMed:18812507}; Short=TDIF receptor {ECO:0000303|PubMed:18812507}; Flags: Precursor;	-2.40908	1.76659e-05	0.000499331	down	NPS233-1_vs_NPS233-2
Glyma.02G133900	RecName: Full=Probable carboxylesterase 2; AltName: Full=AtCXE2; EC=3.1.1.1;	-2.4061	0.000809245	0.0112244	down	NPS233-1_vs_NPS233-2
Glyma.08G244900	RecName: Full=Alpha-amylase 3, chloroplastic {ECO:0000303|PubMed:15637061}; Short=AtAMY3 {ECO:0000303|PubMed:15637061}; EC=3.2.1.1 {ECO:0000269|PubMed:24089528}; AltName: Full=1,4-alpha-D-glucan glucanohydrolase; Flags: Precursor;	-2.40558	0.00201909	0.0234144	down	NPS233-1_vs_NPS233-2
Glyma.19G138200	--	-2.40511	0.00022715	0.00405148	down	NPS233-1_vs_NPS233-2
Glyma.02G047600	RecName: Full=Ferredoxin--NADP reductase, leaf isozyme, chloroplastic; Short=FNR; EC=1.18.1.2; Flags: Precursor;	-2.40456	9.12276e-09	7.31154e-07	down	NPS233-1_vs_NPS233-2
Glyma.20G211000	RecName: Full=Protein EXORDIUM-like 5; Flags: Precursor;	-2.40285	8.4815e-05	0.00181175	down	NPS233-1_vs_NPS233-2
Glyma.19G161400	RecName: Full=Photosystem II reaction center W protein, chloroplastic; AltName: Full=PSII 6.1 kDa protein; Flags: Precursor;	-2.39796	1.61855e-07	9.18526e-06	down	NPS233-1_vs_NPS233-2
Glyma.19G227700	RecName: Full=Chloroplast stem-loop binding protein of 41 kDa b, chloroplastic; Short=CSP41-b; AltName: Full=Heteroglycan-interacting protein 1.3; AltName: Full=Protein CHLOROPLAST RNA BINDING; AltName: Full=Protein Gb5f; Flags: Precursor;	-2.3953	0.000782783	0.0109468	down	NPS233-1_vs_NPS233-2
Glyma.12G002800	RecName: Full=Probable RNA-binding protein ARP1; AltName: Full=ABA-regulated RNA-binding protein 1 {ECO:0000303|PubMed:23040517};	-2.39341	8.55093e-08	5.21827e-06	down	NPS233-1_vs_NPS233-2
Glyma.11G130200	RecName: Full=Linoleate 13S-lipoxygenase 2-1, chloroplastic; EC=1.13.11.12; AltName: Full=Lipoxygenase 2-1; Flags: Precursor;	-2.39215	7.03855e-08	4.40032e-06	down	NPS233-1_vs_NPS233-2
Glyma.06G047700	RecName: Full=Lecithin-cholesterol acyltransferase-like 1; EC=2.3.1.-;	-2.39115	0.00125062	0.0159696	down	NPS233-1_vs_NPS233-2
Glyma.05G090600	RecName: Full=3-dehydrosphinganine reductase TSC10A; EC=1.1.1.102; AltName: Full=3-ketodihydrosphingosine reductase; Short=KDS reductase; AltName: Full=3-ketosphinganine reductase;	-2.39059	0.00213863	0.0244606	down	NPS233-1_vs_NPS233-2
Glyma.15G058000	RecName: Full=MADS-box protein JOINTLESS; AltName: Full=LeMADS;	-2.38663	0.00164763	0.0198725	down	NPS233-1_vs_NPS233-2
Glyma.03G063600	RecName: Full=Auxin transporter-like protein 4; AltName: Full=AUX1-like protein 4; AltName: Full=MtLAX4;	-2.37895	0.000309823	0.00526306	down	NPS233-1_vs_NPS233-2
Glyma.17G141400	--	-2.37846	0.000598238	0.00885404	down	NPS233-1_vs_NPS233-2
Glyma.20G099700	RecName: Full=CASP-like protein 4C2; Short=PtCASPL4C2;	-2.36402	0.00539982	0.0495739	down	NPS233-1_vs_NPS233-2
Glyma.10G084200	RecName: Full=Protein WVD2-like 4 {ECO:0000305};	-2.36389	7.97805e-06	0.000257242	down	NPS233-1_vs_NPS233-2
Glyma.12G208500	RecName: Full=PLASMODESMATA CALLOSE-BINDING PROTEIN 5; Short=AtPDCB5; AltName: Full=Glucan endo-1,3-beta-glucosidase-like protein 1; Flags: Precursor;	-2.3638	1.28694e-08	9.90074e-07	down	NPS233-1_vs_NPS233-2
Glyma.10G113600	RecName: Full=Lectin DB58; Contains: RecName: Full=Lectin DB58 subunit alpha; Contains: RecName: Full=Lectin DB58 subunit beta; Flags: Precursor;	-2.3628	0.0036099	0.0365105	down	NPS233-1_vs_NPS233-2
Glyma.11G190600	RecName: Full=GDSL esterase/lipase At5g22810; EC=3.1.1.-; AltName: Full=Extracellular lipase At5g22810; Flags: Precursor;	-2.36277	0.00223844	0.0253173	down	NPS233-1_vs_NPS233-2
Glyma.07G019700	RecName: Full=Photosystem I reaction center subunit VI-2, chloroplastic; AltName: Full=PSI-H1; Flags: Precursor;	-2.35767	1.40626e-06	5.91324e-05	down	NPS233-1_vs_NPS233-2
Glyma.13G204800	RecName: Full=ATP synthase gamma chain, chloroplastic; AltName: Full=F-ATPase gamma subunit; Flags: Precursor;	-2.35682	3.17376e-06	0.00011823	down	NPS233-1_vs_NPS233-2
Glyma.07G140200	RecName: Full=Probable glutathione S-transferase; EC=2.5.1.18; AltName: Full=G2-4; AltName: Full=Heat shock protein 26A;	-2.35665	9.32328e-08	5.60054e-06	down	NPS233-1_vs_NPS233-2
Glyma.08G043300	RecName: Full=Dynein 8 kDa light chain, flagellar outer arm;	-2.3501	0.00317701	0.0332029	down	NPS233-1_vs_NPS233-2
Glyma.20G167500	--	-2.34445	0.00256936	0.0282483	down	NPS233-1_vs_NPS233-2
Glyma.05G150400	RecName: Full=Xyloglucan endotransglucosylase/hydrolase 2 {ECO:0000250|UniProtKB:Q38857}; EC=2.4.1.207 {ECO:0000250|UniProtKB:Q38857}; AltName: Full=Brassinosteroid-regulated protein BRU1 {ECO:0000303|PubMed:8115544}; Flags: Precursor;	-2.34312	0.00143075	0.0178023	down	NPS233-1_vs_NPS233-2
Glyma.06G143800	RecName: Full=Potassium transporter 2; Short=AtKT2; Short=AtKUP2; Short=AtPOT2;	-2.33862	1.95494e-07	1.0793e-05	down	NPS233-1_vs_NPS233-2
Glyma.15G267200	--	-2.33748	0.000250803	0.00440426	down	NPS233-1_vs_NPS233-2
Glyma.06G137300	RecName: Full=Caffeic acid 3-O-methyltransferase; Short=CAOMT; Short=COMT; EC=2.1.1.68; AltName: Full=S-adenosysl-L-methionine:caffeic acid 3-O-methyltransferase;	-2.33204	0.0050097	0.0468549	down	NPS233-1_vs_NPS233-2
Glyma.09G098000	RecName: Full=CBL-interacting serine/threonine-protein kinase 6; EC=2.7.11.1; AltName: Full=SNF1-related kinase 3.14; AltName: Full=SOS2-like protein kinase PKS4; AltName: Full=SOS3-interacting protein 3;	-2.33155	4.19202e-05	0.00102126	down	NPS233-1_vs_NPS233-2
Glyma.13G045500	RecName: Full=Agamous-like MADS-box protein AGL82 {ECO:0000305};	-2.33153	0.00291947	0.0312202	down	NPS233-1_vs_NPS233-2
Glyma.20G096100	RecName: Full=Transcription factor bHLH149; AltName: Full=ATBS1 interacting factor 4; AltName: Full=Basic helix-loop-helix protein 149; Short=AtbHLH149; Short=bHLH 149; AltName: Full=Transcription factor EN 144; AltName: Full=bHLH transcription factor bHLH149;	-2.32629	0.000141606	0.00274415	down	NPS233-1_vs_NPS233-2
Glyma.19G146000	RecName: Full=Squamosa promoter-binding-like protein 9;	-2.3261	0.000900269	0.0121954	down	NPS233-1_vs_NPS233-2
Glyma.14G075100	--	-2.32308	0.000723098	0.0103046	down	NPS233-1_vs_NPS233-2
Glyma.12G217400	RecName: Full=Embryonic abundant protein USP92; Flags: Precursor;	-2.32254	3.60607e-08	2.45982e-06	down	NPS233-1_vs_NPS233-2
Glyma.14G219300	RecName: Full=Tubulin beta chain; AltName: Full=Beta-tubulin;	-2.32151	0.000349533	0.00580588	down	NPS233-1_vs_NPS233-2
Glyma.10G172700	RecName: Full=Methionine gamma-lyase; Short=AtMGL; EC=4.4.1.11; AltName: Full=L-methioninase;	-2.31643	1.44633e-09	1.42297e-07	down	NPS233-1_vs_NPS233-2
Glyma.02G146100	RecName: Full=Protein MARD1 {ECO:0000303|PubMed:15159630}; AltName: Full=Mediator of ABA-regulated dormancy1 {ECO:0000303|PubMed:15159630}; AltName: Full=Senescence-associated protein SAG102 {ECO:0000303|PubMed:11402199};	-2.31596	0.000209895	0.00379891	down	NPS233-1_vs_NPS233-2
Glyma.02G196500	RecName: Full=BEL1-like homeodomain protein 1; Short=BEL1-like protein 1; AltName: Full=Protein EMBRYO SAC DEVELOPMENT ARREST 29;	-2.31501	0.000382126	0.00621938	down	NPS233-1_vs_NPS233-2
Glyma.01G158600	--	-2.31102	0.00090895	0.0122588	down	NPS233-1_vs_NPS233-2
Glyma.18G076000	RecName: Full=Nudix hydrolase 20, chloroplastic; Short=AtNUDT20; EC=3.6.1.-; Flags: Precursor;	-2.3099	0.00305782	0.0323108	down	NPS233-1_vs_NPS233-2
Glyma.16G145000	RecName: Full=Dof zinc finger protein DOF3.4; Short=AtDOF3.4; AltName: Full=OBF-binding protein 1;	-2.30906	1.56026e-05	0.000453111	down	NPS233-1_vs_NPS233-2
Glyma.11G022400	RecName: Full=E3 ubiquitin-protein ligase RHA1B {ECO:0000305}; EC=2.3.2.27; AltName: Full=RING-H2 finger A1b {ECO:0000303|PubMed:9781696}; AltName: Full=RING-H2 zinc finger protein RHA1b {ECO:0000305}; AltName: Full=RING-type E3 ubiquitin transferase RHA1B {ECO:0000305};	-2.30818	0.00418759	0.0407941	down	NPS233-1_vs_NPS233-2
Glyma.02G135800	--	-2.30662	0.000901092	0.0122011	down	NPS233-1_vs_NPS233-2
Glyma.03G153800	RecName: Full=Cyclin-P3-1; Short=CycP3;1;	-2.30647	1.6034e-05	0.000463865	down	NPS233-1_vs_NPS233-2
Glyma.08G059500	RecName: Full=Protein TRANSPORT INHIBITOR RESPONSE 1; AltName: Full=Weak ethylene-insensitive protein 1;	-2.30268	0.000603347	0.00892117	down	NPS233-1_vs_NPS233-2
Glyma.09G250800	RecName: Full=Photosystem I reaction center subunit XI, chloroplastic; Short=PSI-L; AltName: Full=PSI subunit V; Flags: Precursor;	-2.30188	3.10306e-08	2.15015e-06	down	NPS233-1_vs_NPS233-2
Glyma.08G334500	--	-2.30166	6.40195e-06	0.000214535	down	NPS233-1_vs_NPS233-2
Glyma.07G137300	RecName: Full=Delta-1-pyrroline-5-carboxylate synthase; Short=P5CS; Includes: RecName: Full=Glutamate 5-kinase; Short=GK; EC=2.7.2.11; AltName: Full=Gamma-glutamyl kinase; Includes: RecName: Full=Gamma-glutamyl phosphate reductase; Short=GPR; EC=1.2.1.41; AltName: Full=Glutamate-5-semialdehyde dehydrogenase; AltName: Full=Glutamyl-gamma-semialdehyde dehydrogenase;	-2.30146	0.00442841	0.0426463	down	NPS233-1_vs_NPS233-2
Glyma.13G341100	RecName: Full=Serine/threonine-protein kinase BSK5 {ECO:0000305}; EC=2.7.11.1 {ECO:0000305}; AltName: Full=Brassinosteroid-signaling kinase 5 {ECO:0000303|PubMed:18653891};	-2.30069	0.00022586	0.00403316	down	NPS233-1_vs_NPS233-2
Glyma.05G138800	RecName: Full=Probable transmembrane ascorbate ferrireductase 3; EC=1.16.5.1; AltName: Full=Artb561-3; AltName: Full=Protein b561A.tha14;	-2.30027	0.00258921	0.0283851	down	NPS233-1_vs_NPS233-2
Glyma.19G167600	RecName: Full=Acid phosphatase 1; EC=3.1.3.2; AltName: Full=Apase-1(1); Flags: Precursor;	-2.29289	0.000180327	0.00335271	down	NPS233-1_vs_NPS233-2
Glyma.12G229200	RecName: Full=14-3-3-like protein D; AltName: Full=SGF14D;	-2.29176	2.43009e-09	2.21364e-07	down	NPS233-1_vs_NPS233-2
Glyma.08G153600	--	-2.28941	0.000106096	0.0021516	down	NPS233-1_vs_NPS233-2
Glyma.06G157200	RecName: Full=Beta-galactosidase 3; Short=Lactase 3; EC=3.2.1.23; Flags: Precursor;	-2.28568	0.00402056	0.0396251	down	NPS233-1_vs_NPS233-2
Glyma.13G087200	RecName: Full=Sulfate transporter 1.3;	-2.28508	0.0042074	0.0409267	down	NPS233-1_vs_NPS233-2
Glyma.15G275700	RecName: Full=Photosystem II 5 kDa protein, chloroplastic; Short=PSII-T; AltName: Full=Light-regulated unknown 11 kDa protein; Flags: Precursor;	-2.28242	1.42901e-06	6.00065e-05	down	NPS233-1_vs_NPS233-2
Glyma.08G152800	RecName: Full=DNA damage-repair/toleration protein DRT100; Flags: Precursor;	-2.27683	0.000338721	0.00564155	down	NPS233-1_vs_NPS233-2
Glyma.02G252900	--	-2.27657	0.00509786	0.0474883	down	NPS233-1_vs_NPS233-2
Glyma.08G204800	RecName: Full=Photosystem I reaction center subunit VI-2, chloroplastic; AltName: Full=PSI-H1; Flags: Precursor;	-2.27638	3.52946e-07	1.82125e-05	down	NPS233-1_vs_NPS233-2
Glyma.08G161600	--	-2.27432	7.62885e-06	0.00024833	down	NPS233-1_vs_NPS233-2
Glyma.07G236300	RecName: Full=Galactolipid galactosyltransferase SFR2, chloroplastic {ECO:0000305|PubMed:20798281}; EC=2.4.1.184 {ECO:0000269|PubMed:20798281, ECO:0000269|PubMed:25100720}; AltName: Full=Galactolipid:galactolipid galactosyltransferase {ECO:0000303|PubMed:15590685}; Short=GGGT {ECO:0000303|PubMed:15590685}; AltName: Full=Protein SENSITIVE TO FREEZING 2 {ECO:0000303|PubMed:15258268}; Short=AtSFR2 {…	-2.26465	5.96515e-05	0.00136749	down	NPS233-1_vs_NPS233-2
Glyma.12G166400	--	-2.2632	0.0052433	0.048493	down	NPS233-1_vs_NPS233-2
Glyma.15G098400	RecName: Full=Vesicle-associated protein 1-3; AltName: Full=Plant VAP homolog 13; Short=AtPVA13; AltName: Full=VAMP-associated protein 1-3; Contains: RecName: Full=Vesicle-associated protein 1-3, N-terminally processed;	-2.26316	2.03542e-05	0.000561359	down	NPS233-1_vs_NPS233-2
Glyma.06G121100	RecName: Full=Basic blue protein; AltName: Full=CBP; AltName: Full=Cusacyanin; AltName: Full=Plantacyanin;	-2.26314	0.000180445	0.00335287	down	NPS233-1_vs_NPS233-2
Glyma.13G313500	RecName: Full=Serine/threonine-protein kinase Nek5 {ECO:0000305}; EC=2.7.11.1 {ECO:0000305}; AltName: Full=NimA-related protein kinase 5 {ECO:0000303|PubMed:17886359}; AltName: Full=OsNek5 {ECO:0000303|PubMed:17886359};	-2.26306	0.000160484	0.00303712	down	NPS233-1_vs_NPS233-2
novel.46	--	-2.25443	0.00273174	0.0297247	down	NPS233-1_vs_NPS233-2
Glyma.03G077300	--	-2.25423	0.00489038	0.0459857	down	NPS233-1_vs_NPS233-2
Glyma.16G080800	RecName: Full=Protein yippee-like At4g27745;	-2.25135	0.00407764	0.0400407	down	NPS233-1_vs_NPS233-2
Glyma.03G050100	RecName: Full=Ferritin-2, chloroplastic; EC=1.16.3.1; AltName: Full=SFerH-2; Flags: Precursor;	-2.24901	0.000822504	0.0113377	down	NPS233-1_vs_NPS233-2
Glyma.07G229000	RecName: Full=Expansin-A1; Short=AtEXPA1; AltName: Full=Alpha-expansin-1; Short=At-EXP1; Short=AtEx1; AltName: Full=Ath-ExpAlpha-1.2; Flags: Precursor;	-2.24839	0.000731602	0.0104065	down	NPS233-1_vs_NPS233-2
Glyma.06G051500	RecName: Full=Protein NDL2 {ECO:0000305}; AltName: Full=Protein N-MYC DOWNREGULATED-LIKE 2 {ECO:0000303|PubMed:19948787};	-2.24507	2.47488e-05	0.000664644	down	NPS233-1_vs_NPS233-2
Glyma.02G015600	RecName: Full=Probable polygalacturonase; Short=PG {ECO:0000250|UniProtKB:Q7M1E7}; EC=3.2.1.15; AltName: Full=Pectinase {ECO:0000250|UniProtKB:Q7M1E7};	-2.24419	0.000929115	0.0125088	down	NPS233-1_vs_NPS233-2
Glyma.07G258700	RecName: Full=Beta-glucosidase 46; Short=AtBGLU46; EC=3.2.1.21; Flags: Precursor;	-2.24183	0.00396741	0.039247	down	NPS233-1_vs_NPS233-2
Glyma.18G243000	--	-2.23819	0.00224536	0.0253582	down	NPS233-1_vs_NPS233-2
Glyma.13G087300	RecName: Full=Protein MARD1 {ECO:0000303|PubMed:15159630}; AltName: Full=Mediator of ABA-regulated dormancy1 {ECO:0000303|PubMed:15159630}; AltName: Full=Senescence-associated protein SAG102 {ECO:0000303|PubMed:11402199};	-2.23638	5.25517e-05	0.00123139	down	NPS233-1_vs_NPS233-2
Glyma.07G126200	RecName: Full=Glutathione hydrolase 3; EC=3.4.19.13; AltName: Full=Gamma-glutamyltransferase 3; AltName: Full=Gamma-glutamyltranspeptidase 3; EC=2.3.2.2; AltName: Full=Gamma-glutamyltranspeptidase 4;	-2.23228	3.79803e-05	0.000944003	down	NPS233-1_vs_NPS233-2
Glyma.06G308900	RecName: Full=Putative axial regulator YABBY 2;	-2.22879	1.494e-06	6.20565e-05	down	NPS233-1_vs_NPS233-2
Glyma.05G036600	RecName: Full=Serine/threonine-protein kinase STY13 {ECO:0000305}; EC=2.7.11.1 {ECO:0000269|PubMed:16429265}; AltName: Full=AtSTYPK {ECO:0000303|PubMed:17291444}; AltName: Full=Serine/threonine/tyrosine-protein kinase 13 {ECO:0000303|PubMed:16429265};	-2.22801	0.000122907	0.00242621	down	NPS233-1_vs_NPS233-2
Glyma.02G138600	--	-2.22781	0.000788203	0.0109926	down	NPS233-1_vs_NPS233-2
Glyma.17G247900	RecName: Full=Probable galacturonosyltransferase-like 1; EC=2.4.1.-; AltName: Full=Protein GAOLAOZHUANGREN 1; AltName: Full=Protein PARVUS;	-2.22778	0.00048984	0.00754826	down	NPS233-1_vs_NPS233-2
Glyma.18G286500	RecName: Full=PsbP-like protein 1, chloroplastic; AltName: Full=OEC23-like protein 4; AltName: Full=PsbP-related thylakoid lumenal protein 2; Flags: Precursor;	-2.225	0.000938375	0.0126169	down	NPS233-1_vs_NPS233-2
Glyma.06G302300	RecName: Full=Xyloglucan endotransglucosylase/hydrolase protein 9; Short=At-XTH9; Short=XTH-9; EC=2.4.1.207; Flags: Precursor;	-2.22498	2.61544e-05	0.000697512	down	NPS233-1_vs_NPS233-2
Glyma.07G140400	RecName: Full=Probable glutathione S-transferase; EC=2.5.1.18; AltName: Full=G2-4; AltName: Full=Heat shock protein 26A;	-2.22292	3.39474e-09	2.91891e-07	down	NPS233-1_vs_NPS233-2
Glyma.08G070300	--	-2.21806	0.00108582	0.0141891	down	NPS233-1_vs_NPS233-2
Glyma.03G017800	--	-2.21474	0.000801306	0.0111349	down	NPS233-1_vs_NPS233-2
Glyma.19G011200	RecName: Full=RING-H2 finger protein ATL46; EC=2.3.2.27 {ECO:0000305}; AltName: Full=RING-type E3 ubiquitin transferase ATL46 {ECO:0000305};	-2.21375	0.00305595	0.0323022	down	NPS233-1_vs_NPS233-2
Glyma.15G001900	--	-2.21307	0.00230312	0.0258678	down	NPS233-1_vs_NPS233-2
Glyma.14G075900	--	-2.21293	4.95844e-05	0.00117623	down	NPS233-1_vs_NPS233-2
Glyma.18G229700	RecName: Full=(+)-neomenthol dehydrogenase {ECO:0000303|PubMed:18599651}; EC=1.1.1.- {ECO:0000269|PubMed:21169366}; EC=1.1.1.208 {ECO:0000269|PubMed:18599651}; AltName: Full=Menthone:neomenthol reductase; AltName: Full=Short-chain dehydrogenase/reductase 1; Short=AtSDR1;	-2.21291	0.00258379	0.0283459	down	NPS233-1_vs_NPS233-2
Glyma.09G272800	--	-2.21109	9.31722e-05	0.00196026	down	NPS233-1_vs_NPS233-2
Glyma.10G289200	RecName: Full=CASP-like protein 4C2; Short=PtCASPL4C2;	-2.20903	0.000982139	0.0130963	down	NPS233-1_vs_NPS233-2
Glyma.17G162000	RecName: Full=LOB domain-containing protein 38; AltName: Full=ASYMMETRIC LEAVES 2-like protein 40; Short=AS2-like protein 40;	-2.20602	0.00144344	0.0179167	down	NPS233-1_vs_NPS233-2
Glyma.07G271200	RecName: Full=UDP-glucose 4-epimerase GEPI42; EC=5.1.3.2; AltName: Full=Galactowaldenase; AltName: Full=UDP-galactose 4-epimerase;	-2.20406	0.00037332	0.00611822	down	NPS233-1_vs_NPS233-2
Glyma.02G192200	RecName: Full=Probable inactive purple acid phosphatase 16; Flags: Precursor;	-2.20227	0.00339117	0.0348145	down	NPS233-1_vs_NPS233-2
Glyma.12G047500	RecName: Full=Cold-regulated 413 plasma membrane protein 2; Short=AtCOR413-PM2;	-2.20098	2.07084e-10	2.36307e-08	down	NPS233-1_vs_NPS233-2
Glyma.13G340000	RecName: Full=Aldehyde dehydrogenase family 3 member F1; EC=1.2.1.3;	-2.20069	4.27548e-05	0.00103685	down	NPS233-1_vs_NPS233-2
Glyma.11G044700	RecName: Full=EPIDERMAL PATTERNING FACTOR-like protein 2 {ECO:0000303|PubMed:19435754}; Short=EPF-like protein 2; Contains: RecName: Full=MEPFL2 {ECO:0000305}; Flags: Precursor;	-2.19876	0.00159258	0.0194152	down	NPS233-1_vs_NPS233-2
Glyma.07G103500	RecName: Full=Probable inactive receptor kinase At1g48480; Flags: Precursor;	-2.19688	0.00366206	0.0369286	down	NPS233-1_vs_NPS233-2
Glyma.17G154800	RecName: Full=Protein LSD1; AltName: Full=Protein LESION SIMULATING DISEASE 1; Short=OsLSD1; AltName: Full=Putative zinc finger LSD1;	-2.1967	0.000201496	0.00367286	down	NPS233-1_vs_NPS233-2
Glyma.01G025100	--	-2.19362	0.000477462	0.00740211	down	NPS233-1_vs_NPS233-2
Glyma.15G056600	RecName: Full=Transcription factor SAC51; AltName: Full=Basic helix-loop-helix protein 142; Short=AtbHLH142; Short=bHLH 142; AltName: Full=Protein SUPPRESSOR OF ACAULIS 51; AltName: Full=Transcription factor EN 128; AltName: Full=bHLH transcription factor bHLH142;	-2.18888	5.16102e-07	2.53476e-05	down	NPS233-1_vs_NPS233-2
Glyma.18G255600	RecName: Full=Probable serine/threonine-protein kinase PIX7 {ECO:0000305}; EC=2.7.11.1 {ECO:0000305};	-2.18788	0.00331977	0.0342418	down	NPS233-1_vs_NPS233-2
Glyma.01G030900	RecName: Full=Polygalacturonase 1 beta-like protein 3 {ECO:0000303|PubMed:26106400}; Short=AtPGL3 {ECO:0000303|PubMed:26106400}; AltName: Full=Aromatic-rich glycoprotein JP650; AltName: Full=PG1beta-like protein 3 {ECO:0000303|PubMed:26106400}; AltName: Full=Polygalacturonase 2 {ECO:0000303|PubMed:19639386}; AltName: Full=Probable polygalacturonase non-catalytic subunit JP650; Flags: Precursor;	-2.1857	0.00077034	0.0108089	down	NPS233-1_vs_NPS233-2
Glyma.08G231100	RecName: Full=Putative kinase-like protein TMKL1; Flags: Precursor;	-2.18551	0.00160858	0.0195243	down	NPS233-1_vs_NPS233-2
Glyma.15G107900	RecName: Full=ATP synthase gamma chain, chloroplastic; AltName: Full=F-ATPase gamma subunit; Flags: Precursor;	-2.18089	8.53459e-06	0.000273749	down	NPS233-1_vs_NPS233-2
Glyma.09G008200	RecName: Full=Probable E3 ubiquitin-protein ligase LUL4; EC=2.3.2.27; AltName: Full=Probable RING-type E3 ubiquitin transferase LUL4 {ECO:0000305}; AltName: Full=Protein LOG2-LIKE UBIQUITIN LIGASE 4; AltName: Full=RING finger protein 208;	-2.17693	0.00218742	0.024887	down	NPS233-1_vs_NPS233-2
Glyma.17G023100	RecName: Full=CASP-like protein 1E2; Short=GmCASPL1E2;	-2.17146	0.000114182	0.0022923	down	NPS233-1_vs_NPS233-2
Glyma.19G015500	--	-2.17137	9.34794e-09	7.4531e-07	down	NPS233-1_vs_NPS233-2
Glyma.19G012900	--	-2.16908	6.10877e-05	0.00139209	down	NPS233-1_vs_NPS233-2
Glyma.06G293200	--	-2.16617	0.000700695	0.0100598	down	NPS233-1_vs_NPS233-2
Glyma.12G202500	RecName: Full=Photosystem II repair protein PSB27-H1, chloroplastic; Short=Psb27-H1; AltName: Full=Thylakoid lumenal protein PSB27-H1; Flags: Precursor;	-2.16554	0.000742716	0.0105084	down	NPS233-1_vs_NPS233-2
Glyma.01G050900	RecName: Full=Photosynthetic NDH subunit of lumenal location 2, chloroplastic {ECO:0000303|PubMed:21785130}; AltName: Full=PsbQ-like protein 1; Flags: Precursor;	-2.16554	0.00284754	0.0306695	down	NPS233-1_vs_NPS233-2
Glyma.13G261200	RecName: Full=C2 domain-containing protein At1g53590; AltName: Full=N-terminal-TM-C2 domain type 6 protein 1; Short=NTMC2TYPE6.1;	-2.16353	0.00191317	0.0224491	down	NPS233-1_vs_NPS233-2
Glyma.20G001600	RecName: Full=Transcription factor TCP7;	-2.1617	0.000399327	0.00644127	down	NPS233-1_vs_NPS233-2
Glyma.16G143600	RecName: Full=Oxygen-evolving enhancer protein 1, chloroplastic; Short=OEE1; AltName: Full=33 kDa subunit of oxygen evolving system of photosystem II; AltName: Full=33 kDa thylakoid membrane protein; AltName: Full=OEC 33 kDa subunit; Flags: Precursor;	-2.16115	6.69577e-07	3.20145e-05	down	NPS233-1_vs_NPS233-2
Glyma.08G117200	RecName: Full=Shaggy-related protein kinase eta {ECO:0000303|PubMed:9611268}; EC=2.7.11.1 {ECO:0000269|PubMed:11847343, ECO:0000269|PubMed:12428015}; AltName: Full=ASK-eta {ECO:0000303|PubMed:10080716}; AltName: Full=Protein BRASSINOSTEROID INSENSITIVE 2 {ECO:0000303|PubMed:11847343}; AltName: Full=Protein ULTRACURVATA 1 {ECO:0000303|PubMed:11820813}; AltName: Full=Shaggy-related protein kinase 2…	-2.15814	0.00090396	0.0122337	down	NPS233-1_vs_NPS233-2
Glyma.17G037700	RecName: Full=30S ribosomal protein S1, chloroplastic {ECO:0000303|PubMed:10874039}; AltName: Full=CS1; AltName: Full=Chloroplastic small ribosomal subunit protein bS1c {ECO:0000303|PubMed:28007896}; Flags: Precursor;	-2.15781	5.50015e-07	2.6714e-05	down	NPS233-1_vs_NPS233-2
Glyma.07G209200	--	-2.15571	5.8189e-05	0.00133996	down	NPS233-1_vs_NPS233-2
Glyma.15G190500	RecName: Full=S-adenosylmethionine synthase; Short=AdoMet synthase; EC=2.5.1.6 {ECO:0000250|UniProtKB:Q96551}; AltName: Full=Methionine adenosyltransferase; Short=MAT;	-2.15292	6.16706e-17	2.17591e-14	down	NPS233-1_vs_NPS233-2
Glyma.04G015000	RecName: Full=Monosaccharide-sensing protein 2; AltName: Full=Sugar transporter MSSP2;	-2.15247	2.27345e-05	0.000615939	down	NPS233-1_vs_NPS233-2
Glyma.16G009200	--	-2.15232	0.00237745	0.0265331	down	NPS233-1_vs_NPS233-2
Glyma.17G259000	RecName: Full=Synaptotagmin-2; AltName: Full=NTMC2T1.2; AltName: Full=Synaptotagmin B;	-2.15184	1.14659e-05	0.000349857	down	NPS233-1_vs_NPS233-2
Glyma.06G267400	RecName: Full=TMV resistance protein N;	-2.14807	1.03276e-05	0.000321563	down	NPS233-1_vs_NPS233-2
Glyma.06G162700	RecName: Full=Mitochondrial adenine nucleotide transporter ADNT1; AltName: Full=Adenine nucleotide transporter 1;	-2.14616	0.00408159	0.0400411	down	NPS233-1_vs_NPS233-2
Glyma.03G208900	RecName: Full=Probable indole-3-pyruvate monooxygenase YUCCA10; EC=1.14.13.168; AltName: Full=Flavin-containing monooxygenase YUCCA10;	-2.14013	0.000671195	0.00970466	down	NPS233-1_vs_NPS233-2
Glyma.06G319300	RecName: Full=21 kDa protein; AltName: Full=1.2 protein; Flags: Precursor;	-2.13975	0.000485107	0.00749413	down	NPS233-1_vs_NPS233-2
Glyma.07G055000	RecName: Full=Ethylene-responsive transcription factor ERF023;	-2.13775	4.15876e-06	0.000149307	down	NPS233-1_vs_NPS233-2
Glyma.15G203700	RecName: Full=CBL-interacting serine/threonine-protein kinase 6; EC=2.7.11.1; AltName: Full=SNF1-related kinase 3.14; AltName: Full=SOS2-like protein kinase PKS4; AltName: Full=SOS3-interacting protein 3;	-2.13769	2.36928e-05	0.000638519	down	NPS233-1_vs_NPS233-2
Glyma.16G045000	RecName: Full=Xyloglucan endotransglucosylase/hydrolase 1 {ECO:0000305}; EC=2.4.1.207 {ECO:0000250|UniProtKB:Q38857}; Flags: Precursor;	-2.13477	0.00240109	0.0267237	down	NPS233-1_vs_NPS233-2
Glyma.12G071000	RecName: Full=Auxin response factor 4;	-2.13317	0.00106122	0.0139151	down	NPS233-1_vs_NPS233-2
Glyma.13G369800	RecName: Full=Cinnamoyl-CoA reductase 2; Short=AtCCR2; EC=1.2.1.44;	-2.13126	0.00530039	0.0488737	down	NPS233-1_vs_NPS233-2
Glyma.04G112800	RecName: Full=Photosystem I reaction center subunit V, chloroplastic; AltName: Full=PSI-G; Flags: Precursor;	-2.12995	1.35309e-05	0.000400138	down	NPS233-1_vs_NPS233-2
Glyma.13G129700	--	-2.12974	0.00527305	0.0486831	down	NPS233-1_vs_NPS233-2
Glyma.03G235300	--	-2.1272	0.0025735	0.0282754	down	NPS233-1_vs_NPS233-2
Glyma.08G020800	RecName: Full=Probable inactive receptor kinase At4g23740; Flags: Precursor;	-2.12544	7.66026e-05	0.00165942	down	NPS233-1_vs_NPS233-2
Glyma.13G156500	RecName: Full=Dicer-like protein 4; EC=3.1.26.-;	-2.12456	0.00369923	0.0372422	down	NPS233-1_vs_NPS233-2
Glyma.14G086300	RecName: Full=Probable isoaspartyl peptidase/L-asparaginase 2; EC=3.4.19.5; AltName: Full=L-asparagine amidohydrolase 2; Contains: RecName: Full=Isoaspartyl peptidase/L-asparaginase 2 subunit alpha; Contains: RecName: Full=Isoaspartyl peptidase/L-asparaginase 2 subunit beta; Flags: Precursor;	-2.12227	0.00371886	0.0374153	down	NPS233-1_vs_NPS233-2
Glyma.18G005600	RecName: Full=Squamosa promoter-binding-like protein 12;	-2.12146	5.02226e-06	0.000174987	down	NPS233-1_vs_NPS233-2
Glyma.13G112200	RecName: Full=Protein MARD1 {ECO:0000303|PubMed:15159630}; AltName: Full=Mediator of ABA-regulated dormancy1 {ECO:0000303|PubMed:15159630}; AltName: Full=Senescence-associated protein SAG102 {ECO:0000303|PubMed:11402199};	-2.12078	1.04651e-05	0.00032492	down	NPS233-1_vs_NPS233-2
Glyma.10G102100	RecName: Full=Serine carboxypeptidase-like 45; EC=3.4.16.-; Flags: Precursor;	-2.1195	0.00085024	0.0116409	down	NPS233-1_vs_NPS233-2
Glyma.16G128900	--	-2.11634	0.00201225	0.0233705	down	NPS233-1_vs_NPS233-2
Glyma.13G208200	RecName: Full=Basic 7S globulin; AltName: Full=SBg7S; Short=Bg; Contains: RecName: Full=Basic 7S globulin high kDa subunit; Contains: RecName: Full=Basic 7S globulin low kDa subunit; Flags: Precursor;	-2.11397	0.00100324	0.013314	down	NPS233-1_vs_NPS233-2
Glyma.15G275900	RecName: Full=Protein TAB2 homolog, chloroplastic {ECO:0000305}; AltName: Full=Protein ATAB2 {ECO:0000303|PubMed:17139246}; Flags: Precursor;	-2.11322	0.00328542	0.0340018	down	NPS233-1_vs_NPS233-2
Glyma.02G015200	--	-2.10596	0.00178967	0.0212848	down	NPS233-1_vs_NPS233-2
Glyma.17G245000	--	-2.10319	2.43152e-05	0.000654145	down	NPS233-1_vs_NPS233-2
Glyma.16G002700	--	-2.1029	0.000146195	0.00280826	down	NPS233-1_vs_NPS233-2
Glyma.07G047600	RecName: Full=Chlorophyll a-b binding protein 7, chloroplastic; AltName: Full=LHCI type II CAB-7; Flags: Precursor;	-2.10188	4.46407e-05	0.00107305	down	NPS233-1_vs_NPS233-2
Glyma.11G245400	RecName: Full=Photosystem II core complex proteins psbY, chloroplastic; AltName: Full=L-arginine-metabolizing enzyme; Short=L-AME; Contains: RecName: Full=Photosystem II protein psbY-1, chloroplastic; AltName: Full=psbY-A1; Contains: RecName: Full=Photosystem II protein psbY-2, chloroplastic; AltName: Full=psbY-A2; Flags: Precursor;	-2.10149	5.99323e-05	0.0013729	down	NPS233-1_vs_NPS233-2
Glyma.18G123500	RecName: Full=Homeobox-leucine zipper protein ATHB-13; AltName: Full=HD-ZIP protein ATHB-13; AltName: Full=Homeodomain transcription factor ATHB-13;	-2.10017	1.95857e-05	0.000543583	down	NPS233-1_vs_NPS233-2
Glyma.17G039000	RecName: Full=S-adenosylmethionine synthase; Short=AdoMet synthase; EC=2.5.1.6 {ECO:0000250|UniProtKB:Q96551}; AltName: Full=Methionine adenosyltransferase; Short=MAT;	-2.09768	0.00294424	0.0313593	down	NPS233-1_vs_NPS233-2
Glyma.08G123400	--	-2.09436	9.08809e-05	0.00192226	down	NPS233-1_vs_NPS233-2
Glyma.03G145900	RecName: Full=Protein trichome birefringence;	-2.09317	5.52661e-05	0.00128714	down	NPS233-1_vs_NPS233-2
Glyma.01G191900	RecName: Full=Acyl-CoA-binding domain-containing protein 3; Short=Acyl-CoA binding protein 3; Flags: Precursor;	-2.09277	0.00206072	0.0237863	down	NPS233-1_vs_NPS233-2
Glyma.05G193500	RecName: Full=E3 ubiquitin-protein ligase RGLG3 {ECO:0000305}; EC=2.3.2.27 {ECO:0000305}; AltName: Full=RING domain ligase 3 {ECO:0000303|PubMed:22898498};	-2.09089	0.000119646	0.00237098	down	NPS233-1_vs_NPS233-2
Glyma.09G242800	RecName: Full=Nitrate regulatory gene2 protein {ECO:0000303|PubMed:26744214}; Short=NRG2 protein {ECO:0000303|PubMed:26744214};	-2.08969	2.7268e-05	0.000722814	down	NPS233-1_vs_NPS233-2
Glyma.18G269800	--	-2.08927	0.00256426	0.0282023	down	NPS233-1_vs_NPS233-2
Glyma.08G131400	RecName: Full=Alpha-galactosidase; EC=3.2.1.22; AltName: Full=Alpha-D-galactoside galactohydrolase; AltName: Full=Melibiase; Flags: Precursor;	-2.08865	0.00202628	0.0234465	down	NPS233-1_vs_NPS233-2
Glyma.11G238700	RecName: Full=Protein MARD1 {ECO:0000303|PubMed:15159630}; AltName: Full=Mediator of ABA-regulated dormancy1 {ECO:0000303|PubMed:15159630}; AltName: Full=Senescence-associated protein SAG102 {ECO:0000303|PubMed:11402199};	-2.08845	0.000214357	0.00385692	down	NPS233-1_vs_NPS233-2
Glyma.19G245200	RecName: Full=Auxin-responsive protein IAA16; AltName: Full=Indoleacetic acid-induced protein 16;	-2.08782	1.35565e-05	0.000400509	down	NPS233-1_vs_NPS233-2
Glyma.03G158200	--	-2.08363	2.04937e-05	0.000563688	down	NPS233-1_vs_NPS233-2
Glyma.19G232400	RecName: Full=Dormancy-associated protein homolog 3 {ECO:0000305}; AltName: Full=DRM1 homolog 3 {ECO:0000305};	-2.08249	0.00309196	0.0325595	down	NPS233-1_vs_NPS233-2
Glyma.08G020600	RecName: Full=V-type proton ATPase subunit E; Short=V-ATPase subunit E; AltName: Full=ClVE-1; AltName: Full=Vacuolar proton pump subunit E;	-2.07677	0.000675168	0.00974833	down	NPS233-1_vs_NPS233-2
Glyma.05G187300	RecName: Full=Cellulose synthase A catalytic subunit 6 [UDP-forming]; Short=AtCesA6; EC=2.4.1.12; AltName: Full=AraxCelA; AltName: Full=Isoxaben-resistant protein 2; AltName: Full=Protein PROCUSTE 1; AltName: Full=Protein QUILL;	-2.07482	7.35692e-08	4.57142e-06	down	NPS233-1_vs_NPS233-2
Glyma.10G217900	RecName: Full=Sucrose transport protein SUC2; AltName: Full=Sucrose permease 2; AltName: Full=Sucrose transporter 1; AltName: Full=Sucrose-proton symporter 2;	-2.07291	0.00334976	0.0344816	down	NPS233-1_vs_NPS233-2
Glyma.16G197200	RecName: Full=Probable methyltransferase PMT16; EC=2.1.1.-;	-2.07163	0.00286791	0.030824	down	NPS233-1_vs_NPS233-2
Glyma.04G188700	RecName: Full=Elongation factor Tu, chloroplastic; Short=EF-Tu; Flags: Precursor;	-2.07084	1.65716e-06	6.7734e-05	down	NPS233-1_vs_NPS233-2
Glyma.13G296600	RecName: Full=Mannan endo-1,4-beta-mannosidase 2; EC=3.2.1.78; AltName: Full=Beta-mannanase 2; AltName: Full=Endo-beta-1,4-mannanase 2; Short=AtMAN2; Flags: Precursor;	-2.06853	0.00195818	0.0228548	down	NPS233-1_vs_NPS233-2
Glyma.15G026000	--	-2.06697	9.99146e-07	4.42565e-05	down	NPS233-1_vs_NPS233-2
Glyma.05G014000	RecName: Full=Arogenate dehydrogenase 1, chloroplastic; EC=1.3.1.78; AltName: Full=TYRATC; AltName: Full=TyrAAT1; Flags: Precursor;	-2.06499	4.38248e-05	0.00105592	down	NPS233-1_vs_NPS233-2
Glyma.02G091600	--	-2.06392	0.00135504	0.017012	down	NPS233-1_vs_NPS233-2
Glyma.09G018500	RecName: Full=Endoglucanase 25; EC=3.2.1.4; AltName: Full=Cellulase homolog OR16pep; AltName: Full=Endo-1,4-beta glucanase 25; AltName: Full=Protein KORRIGAN; AltName: Full=Protein RADIALLY SWOLLEN 2;	-2.06311	0.00113584	0.0147113	down	NPS233-1_vs_NPS233-2
Glyma.04G235400	RecName: Full=Protein IQ-DOMAIN 1 {ECO:0000303|PubMed:15960618};	-2.06235	0.0045021	0.0431864	down	NPS233-1_vs_NPS233-2
Glyma.06G221300	RecName: Full=Probable purine permease 5; Short=AtPUP5;	-2.0617	0.00459978	0.043863	down	NPS233-1_vs_NPS233-2
Glyma.07G007000	RecName: Full=Seed linoleate 9S-lipoxygenase; EC=1.13.11.58; AltName: Full=Lipoxygenase;	-2.05895	0.000545014	0.00821293	down	NPS233-1_vs_NPS233-2
Glyma.20G067300	RecName: Full=Oligopeptide transporter 7; Short=AtOPT7;	-2.05465	0.000278851	0.00481417	down	NPS233-1_vs_NPS233-2
Glyma.11G031300	--	-2.05295	0.00310927	0.0326521	down	NPS233-1_vs_NPS233-2
Glyma.12G071500	--	-2.04607	0.00225498	0.0254324	down	NPS233-1_vs_NPS233-2
Glyma.15G019100	--	-2.04266	0.00107717	0.0140942	down	NPS233-1_vs_NPS233-2
Glyma.01G008500	RecName: Full=NADP-dependent malic enzyme; Short=NADP-ME; EC=1.1.1.40;	-2.04182	1.58295e-05	0.000458831	down	NPS233-1_vs_NPS233-2
Glyma.02G105900	RecName: Full=Transcription factor TCP8;	-2.04157	0.00466458	0.0443431	down	NPS233-1_vs_NPS233-2
Glyma.01G190900	--	-2.03931	0.0038033	0.0380901	down	NPS233-1_vs_NPS233-2
Glyma.04G013000	RecName: Full=Glucan endo-1,3-beta-D-glucosidase; EC=3.2.1.39; AltName: Full=Major pollen allergen Ole e 9; AltName: Allergen=Ole e 9; Flags: Precursor;	-2.03485	1.85479e-05	0.00051853	down	NPS233-1_vs_NPS233-2
Glyma.13G159400	RecName: Full=Probable serine/threonine-protein kinase PIX7 {ECO:0000305}; EC=2.7.11.1 {ECO:0000305};	-2.03372	0.000183895	0.00340666	down	NPS233-1_vs_NPS233-2
Glyma.17G161900	--	-2.03312	0.00426951	0.0414344	down	NPS233-1_vs_NPS233-2
Glyma.18G224900	--	-2.03268	0.00314588	0.0329464	down	NPS233-1_vs_NPS233-2
Glyma.15G202300	RecName: Full=Peptidyl-prolyl cis-trans isomerase CYP28, chloroplastic; Short=PPIase CYP28; EC=5.2.1.8; AltName: Full=Cyclophilin of 28 kDa; AltName: Full=Cyclophilin-28; Flags: Precursor;	-2.03208	0.000636549	0.00930338	down	NPS233-1_vs_NPS233-2
Glyma.12G229500	RecName: Full=Protein LIGHT-DEPENDENT SHORT HYPOCOTYLS 10; AltName: Full=Protein ORGAN BOUNDARY 10;	-2.03167	0.00141117	0.0176015	down	NPS233-1_vs_NPS233-2
Glyma.02G059300	RecName: Full=Elongation of fatty acids protein 3-like; Short=Protein ELO3-like; EC=2.3.1.-; AltName: Full=Protein HIGH EXPRESSION OF OSMOTICALLY RESPONSIVE GENES 3; AltName: Full=Very long-chain fatty acid condensing enzyme HOS3; Short=VLCFA condensing enzyme HOS3;	-2.03126	0.00185994	0.0219334	down	NPS233-1_vs_NPS233-2
Glyma.19G028500	RecName: Full=UDP-glucose 6-dehydrogenase 1; Short=UDP-Glc dehydrogenase 1; Short=UDP-GlcDH 1; Short=UDPGDH 1; EC=1.1.1.22; AltName: Full=Gm-UGD1;	-2.02933	1.1683e-05	0.00035472	down	NPS233-1_vs_NPS233-2
Glyma.14G191700	RecName: Full=Transcription factor DIVARICATA;	-2.02521	0.00101514	0.0134255	down	NPS233-1_vs_NPS233-2
Glyma.17G233100	--	-2.02357	0.00224813	0.0253708	down	NPS233-1_vs_NPS233-2
Glyma.09G285700	--	-2.02255	0.00355984	0.0361472	down	NPS233-1_vs_NPS233-2
Glyma.15G070700	RecName: Full=COP1-interacting protein 7 {ECO:0000303|PubMed:9668129};	-2.01812	0.00031513	0.00534433	down	NPS233-1_vs_NPS233-2
Glyma.09G204500	RecName: Full=Transcription factor MYC2; Short=AtMYC2; AltName: Full=Basic helix-loop-helix protein 6; Short=AtbHLH6; Short=bHLH 6; AltName: Full=Protein JASMONATE INSENSITIVE 1; AltName: Full=R-homologous Arabidopsis protein 1; Short=RAP-1; AltName: Full=Transcription factor EN 38; AltName: Full=Z-box binding factor 1 protein; AltName: Full=bHLH transcription factor bHLH006; AltName: Full=rd22BP…	-2.01195	0.00542247	0.0497157	down	NPS233-1_vs_NPS233-2
Glyma.01G017000	--	-2.01152	0.00294051	0.0313593	down	NPS233-1_vs_NPS233-2
Glyma.09G069800	RecName: Full=Thiol protease aleurain-like; EC=3.4.22.16; Flags: Precursor;	-2.00949	0.00105117	0.013801	down	NPS233-1_vs_NPS233-2
Glyma.02G303700	RecName: Full=Probable amino acid permease 7; AltName: Full=Amino acid transporter AAP7;	-2.00338	0.000149373	0.00284969	down	NPS233-1_vs_NPS233-2
Glyma.16G189100	RecName: Full=50S ribosomal protein L6, chloroplastic; AltName: Full=Protein EMBRYO DEFECTIVE 2394; Flags: Precursor;	-2.00293	8.18542e-05	0.00175706	down	NPS233-1_vs_NPS233-2
Glyma.10G156100	RecName: Full=Heavy metal-associated isoprenylated plant protein 33 {ECO:0000303|PubMed:21072340, ECO:0000303|PubMed:23368984}; Short=AtHIP33 {ECO:0000303|PubMed:21072340, ECO:0000303|PubMed:23368984}; Flags: Precursor;	-2.00239	0.000257535	0.00450188	down	NPS233-1_vs_NPS233-2
Glyma.12G042800	RecName: Full=Transcription factor bHLH63; AltName: Full=Basic helix-loop-helix protein 63; Short=AtbHLH63; Short=bHLH 63; AltName: Full=Protein CRYPTOCHROME INTERACTING BASIC-HELIX-LOOP-HELIX 1; AltName: Full=Transcription factor EN 84; AltName: Full=bHLH transcription factor bHLH063;	-2.00147	4.52842e-06	0.000159409	down	NPS233-1_vs_NPS233-2
Glyma.13G293200	RecName: Full=Ras-related protein RABA1f; Short=AtRABA1f;	-2.001	0.00381197	0.0381271	down	NPS233-1_vs_NPS233-2
Glyma.10G262400	RecName: Full=Probable cinnamyl alcohol dehydrogenase; Short=CAD; EC=1.1.1.195;	-2.00038	0.000260804	0.00454408	down	NPS233-1_vs_NPS233-2
Glyma.14G174500	RecName: Full=Probable pectin methyltransferase QUA2; EC=2.1.1.-; AltName: Full=Protein OVERSENSITIVE TO SUGAR 1; AltName: Full=Protein QUASIMODO 2; AltName: Full=Protein TUMOROUS SHOOT DEVELOPMENT 2;	-1.99902	0.000757438	0.0106604	down	NPS233-1_vs_NPS233-2
Glyma.12G192900	--	-1.99872	0.0048307	0.0455555	down	NPS233-1_vs_NPS233-2
Glyma.02G068100	--	-1.99755	0.00165022	0.019896	down	NPS233-1_vs_NPS233-2
Glyma.04G041300	RecName: Full=Kinesin-like protein KIN-4A {ECO:0000305}; AltName: Full=GhKINESIN-4A {ECO:0000303|PubMed:25600279};	-1.99644	0.000493643	0.00759162	down	NPS233-1_vs_NPS233-2
Glyma.06G105000	RecName: Full=Ethylene-responsive transcription factor RAP2-4; AltName: Full=Ethylene-responsive transcription factor ERF059; AltName: Full=Protein RELATED TO APETALA2 4;	-1.99474	9.09637e-06	0.00028935	down	NPS233-1_vs_NPS233-2
Glyma.07G001300	RecName: Full=Beta-amyrin synthase; EC=5.4.99.39;	-1.99139	0.0016415	0.0198276	down	NPS233-1_vs_NPS233-2
Glyma.07G073100	RecName: Full=Uncharacterized protein At3g61260;	-1.99019	0.000885189	0.0120405	down	NPS233-1_vs_NPS233-2
Glyma.18G191600	RecName: Full=Putative lipid-transfer protein DIR1; AltName: Full=Protein DEFECTIVE IN INDUCED RESISTANCE 1; Flags: Precursor;	-1.9895	0.00015534	0.00295252	down	NPS233-1_vs_NPS233-2
Glyma.02G051700	RecName: Full=Beta-galactosidase 3; Short=Lactase 3; EC=3.2.1.23; Flags: Precursor;	-1.98553	0.00128456	0.0163072	down	NPS233-1_vs_NPS233-2
Glyma.12G225700	--	-1.98403	0.00477343	0.0451541	down	NPS233-1_vs_NPS233-2
Glyma.10G130200	--	-1.98386	4.60368e-07	2.30529e-05	down	NPS233-1_vs_NPS233-2
Glyma.11G050200	RecName: Full=Acyl-CoA-binding domain-containing protein 3; Short=Acyl-CoA binding protein 3; Flags: Precursor;	-1.97617	0.000361669	0.0059687	down	NPS233-1_vs_NPS233-2
Glyma.10G256000	--	-1.96716	0.00167247	0.0200932	down	NPS233-1_vs_NPS233-2
Glyma.15G221300	RecName: Full=Soyasapogenol B glucuronide galactosyltransferase; EC=2.4.1.272; AltName: Full=Soyasaponin glycosyltransferase 2; AltName: Full=UDP-galactose:SBMG-galactosyltransferase;	-1.96262	8.96054e-05	0.00190085	down	NPS233-1_vs_NPS233-2
Glyma.01G055400	--	-1.961	0.000498427	0.00764986	down	NPS233-1_vs_NPS233-2
novel.352	RecName: Full=Mediator of RNA polymerase II transcription subunit 15a;	-1.95988	0.000184556	0.00341479	down	NPS233-1_vs_NPS233-2
Glyma.11G127200	RecName: Full=Fructokinase-2; EC=2.7.1.4;	-1.9588	0.000402924	0.00648226	down	NPS233-1_vs_NPS233-2
Glyma.04G066000	RecName: Full=ATP synthase subunit b', chloroplastic; AltName: Full=ATP synthase F(0) sector subunit b'; AltName: Full=ATPase subunit II; Flags: Precursor;	-1.95678	2.65112e-05	0.000705801	down	NPS233-1_vs_NPS233-2
Glyma.08G094600	RecName: Full=L-Ala-D/L-amino acid epimerase; EC=5.1.1.-; AltName: Full=L-Ala-D/L-Xxx epimerase;	-1.95653	2.22769e-07	1.20178e-05	down	NPS233-1_vs_NPS233-2
Glyma.05G048000	RecName: Full=ATP synthase delta chain, chloroplastic; AltName: Full=F-ATPase delta chain; Flags: Precursor;	-1.95639	0.000842146	0.0115559	down	NPS233-1_vs_NPS233-2
Glyma.19G022500	RecName: Full=Gibberellin-regulated protein 4; AltName: Full=GAST1 protein homolog 4; Flags: Precursor;	-1.95542	6.34339e-05	0.00143174	down	NPS233-1_vs_NPS233-2
Glyma.13G302900	RecName: Full=Cytochrome b6-f complex iron-sulfur subunit, chloroplastic; EC=1.10.9.1; AltName: Full=Plastohydroquinone:plastocyanin oxidoreductase iron-sulfur protein; AltName: Full=Rieske iron-sulfur protein; Short=ISP; Short=RISP; Flags: Precursor;	-1.95491	1.69156e-05	0.00048167	down	NPS233-1_vs_NPS233-2
Glyma.09G103000	RecName: Full=Cellulose synthase A catalytic subunit 3 [UDP-forming]; Short=AtCesA3; EC=2.4.1.12; AltName: Full=Constitutive expression of VSP1 protein 1; AltName: Full=Isoxaben-resistant protein 1; Short=Ath-B; AltName: Full=Protein ECTOPIC LIGNIN 1; AltName: Full=Protein RADIALLY SWOLLEN 5; Short=AtRSW5;	-1.95346	0.00315282	0.0329853	down	NPS233-1_vs_NPS233-2
Glyma.09G247900	RecName: Full=Phosphoglycolate phosphatase 1B, chloroplastic; EC=3.1.3.18; Flags: Precursor;	-1.95249	0.0031837	0.0332291	down	NPS233-1_vs_NPS233-2
Glyma.11G181100	RecName: Full=Photosystem I subunit O; Short=PSI-O; Flags: Precursor;	-1.95222	6.28124e-05	0.0014219	down	NPS233-1_vs_NPS233-2
Glyma.19G113000	RecName: Full=Tubulin alpha-6 chain; AltName: Full=Alpha-6-tubulin;	-1.95191	5.40225e-08	3.49847e-06	down	NPS233-1_vs_NPS233-2
Glyma.09G143900	--	-1.95169	1.31206e-05	0.000391398	down	NPS233-1_vs_NPS233-2
Glyma.14G098700	--	-1.94942	0.000587314	0.00874141	down	NPS233-1_vs_NPS233-2
Glyma.09G176200	--	-1.94665	0.0050334	0.0470302	down	NPS233-1_vs_NPS233-2
Glyma.05G157000	RecName: Full=bZIP transcription factor 44 {ECO:0000305}; Short=AtbZIP44 {ECO:0000303|PubMed:11906833};	-1.94353	0.00142252	0.0177215	down	NPS233-1_vs_NPS233-2
Glyma.13G232500	RecName: Full=Magnesium-chelatase subunit ChlI, chloroplastic; Short=Mg-chelatase subunit I-1; EC=6.6.1.1; AltName: Full=Mg-protoporphyrin IX chelatase subunit ChlI; Flags: Precursor;	-1.9432	0.000250576	0.0044028	down	NPS233-1_vs_NPS233-2
Glyma.11G106300	RecName: Full=Protein NUCLEAR FUSION DEFECTIVE 4 {ECO:0000303|PubMed:16698901};	-1.94277	0.00237403	0.0265186	down	NPS233-1_vs_NPS233-2
novel.75	RecName: Full=Putative ribonuclease H protein At1g65750; EC=3.1.26.4;	-1.94163	1.08966e-05	0.000335825	down	NPS233-1_vs_NPS233-2
Glyma.16G218000	RecName: Full=Probable cyclic nucleotide-gated ion channel 20, chloroplastic; AltName: Full=Cyclic nucleotide-binding transporter 1; Flags: Precursor;	-1.94146	0.000908261	0.0122588	down	NPS233-1_vs_NPS233-2
Glyma.01G121700	RecName: Full=Rhodanese-like domain-containing protein 10; AltName: Full=Sulfurtransferase 10; Short=AtStr10;	-1.94042	0.0053957	0.0495591	down	NPS233-1_vs_NPS233-2
Glyma.09G031400	RecName: Full=Probable boron transporter 2;	-1.93704	0.00360179	0.0364585	down	NPS233-1_vs_NPS233-2
Glyma.07G101100	RecName: Full=Calcium-binding allergen Ole e 8; AltName: Full=PCA18/PCA23; AltName: Allergen=Ole e 8;	-1.93582	4.11166e-05	0.00100647	down	NPS233-1_vs_NPS233-2
Glyma.11G211900	RecName: Full=Transcription factor VOZ1; AltName: Full=Protein VASCULAR PLANT ONE-ZINC FINGER 1; Short=AtVOZ1;	-1.93044	0.00343936	0.0351681	down	NPS233-1_vs_NPS233-2
Glyma.16G100400	RecName: Full=Defensin-like protein; AltName: Full=Gamma-thionin homolog; Flags: Precursor;	-1.92954	5.0104e-07	2.47664e-05	down	NPS233-1_vs_NPS233-2
Glyma.15G099800	RecName: Full=Histidine-containing phosphotransfer protein 1;	-1.92818	6.07382e-05	0.00138825	down	NPS233-1_vs_NPS233-2
Glyma.04G228300	RecName: Full=Two-component response regulator-like APRR5; AltName: Full=Pseudo-response regulator 5;	-1.92781	0.000191151	0.00352618	down	NPS233-1_vs_NPS233-2
Glyma.14G073500	RecName: Full=Tubby-like F-box protein 5; Short=OsTLP5; AltName: Full=Tubby-like F-box protein 8; Short=OsTLP8;	-1.92752	0.0023342	0.0261404	down	NPS233-1_vs_NPS233-2
Glyma.04G199900	RecName: Full=Transcription factor bHLH137; AltName: Full=Basic helix-loop-helix protein 137; Short=AtbHLH137; Short=bHLH 137; AltName: Full=Transcription factor EN 89; AltName: Full=bHLH transcription factor bHLH137;	-1.92745	0.00360356	0.0364585	down	NPS233-1_vs_NPS233-2
Glyma.13G157300	RecName: Full=Homeobox protein knotted-1-like 3; AltName: Full=Protein KNAT3;	-1.92598	0.000585276	0.00872118	down	NPS233-1_vs_NPS233-2
Glyma.14G016000	RecName: Full=Scarecrow-like protein 5; Short=AtSCL5; AltName: Full=GRAS family protein 6; Short=AtGRAS-6;	-1.92091	0.0038068	0.0381127	down	NPS233-1_vs_NPS233-2
Glyma.10G028800	RecName: Full=Protein NETWORKED 1D {ECO:0000303|PubMed:22840520};	-1.92063	0.000476503	0.00739378	down	NPS233-1_vs_NPS233-2
Glyma.12G096000	RecName: Full=Putative axial regulator YABBY 2;	-1.91952	0.00510545	0.0475044	down	NPS233-1_vs_NPS233-2
Glyma.05G032200	RecName: Full=Transcription factor MYB1R1; AltName: Full=Myb-related protein R1 {ECO:0000303|PubMed:21030505}; Short=StMYB1R-1 {ECO:0000303|PubMed:21030505};	-1.9168	8.00651e-07	3.69576e-05	down	NPS233-1_vs_NPS233-2
Glyma.08G204600	RecName: Full=Protein CURVATURE THYLAKOID 1C, chloroplastic; Flags: Precursor;	-1.91457	0.000402686	0.00648183	down	NPS233-1_vs_NPS233-2
Glyma.08G348300	RecName: Full=Ethylene-responsive transcription factor-like protein At4g13040;	-1.91215	0.00153091	0.0187971	down	NPS233-1_vs_NPS233-2
Glyma.05G168400	RecName: Full=Ferredoxin, chloroplastic; AltName: Full=PFLP; Flags: Precursor;	-1.90885	1.3418e-05	0.000397568	down	NPS233-1_vs_NPS233-2
Glyma.02G192600	RecName: Full=Protein WVD2-like 4 {ECO:0000305};	-1.90767	0.000184913	0.00341932	down	NPS233-1_vs_NPS233-2
Glyma.13G321500	--	-1.90684	0.000361514	0.0059687	down	NPS233-1_vs_NPS233-2
Glyma.15G124600	RecName: Full=Endoglucanase 25; EC=3.2.1.4; AltName: Full=Cellulase homolog OR16pep; AltName: Full=Endo-1,4-beta glucanase 25; AltName: Full=Protein KORRIGAN; AltName: Full=Protein RADIALLY SWOLLEN 2;	-1.9063	0.000181715	0.00337034	down	NPS233-1_vs_NPS233-2
Glyma.20G008600	RecName: Full=Cytochrome b6-f complex subunit 7; AltName: Full=Cytochrome b6-f complex subunit PetM; AltName: Full=Cytochrome b6-f complex subunit VII; Flags: Fragment;	-1.90392	0.000401745	0.00647347	down	NPS233-1_vs_NPS233-2
Glyma.06G261500	RecName: Full=TMV resistance protein N;	-1.90283	6.94234e-05	0.00153642	down	NPS233-1_vs_NPS233-2
Glyma.07G004300	RecName: Full=Calcium-transporting ATPase 9, plasma membrane-type; EC=3.6.3.8; AltName: Full=Ca(2+)-ATPase isoform 9;	-1.90184	0.000362416	0.00597054	down	NPS233-1_vs_NPS233-2
Glyma.11G100800	RecName: Full=Photosystem II stability/assembly factor HCF136, chloroplastic; Flags: Precursor;	-1.90103	0.00042074	0.0067144	down	NPS233-1_vs_NPS233-2
Glyma.03G245100	--	-1.89728	0.00194	0.0227027	down	NPS233-1_vs_NPS233-2
Glyma.04G098600	RecName: Full=RNA-binding protein CP33, chloroplastic {ECO:0000305}; AltName: Full=Protein PIGMENT DEFECTIVE 322; Flags: Precursor;	-1.89515	0.00254325	0.0280214	down	NPS233-1_vs_NPS233-2
Glyma.01G170300	RecName: Full=Thioredoxin H-type; Short=Trx-H;	-1.88376	0.00399722	0.0394559	down	NPS233-1_vs_NPS233-2
Glyma.09G194900	RecName: Full=Kinesin-like protein KIN-14I {ECO:0000305}; AltName: Full=Kinesin-like calmodulin-binding protein {ECO:0000305}; Short=OsKCBP {ECO:0000303|PubMed:19106179};	-1.88038	0.00213625	0.0244497	down	NPS233-1_vs_NPS233-2
Glyma.14G170100	RecName: Full=Protein MARD1 {ECO:0000303|PubMed:15159630}; AltName: Full=Mediator of ABA-regulated dormancy1 {ECO:0000303|PubMed:15159630}; AltName: Full=Senescence-associated protein SAG102 {ECO:0000303|PubMed:11402199};	-1.87981	0.00509615	0.0474883	down	NPS233-1_vs_NPS233-2
Glyma.03G212500	--	-1.87791	0.00503457	0.0470302	down	NPS233-1_vs_NPS233-2
Glyma.18G028400	RecName: Full=Chlorophyll a-b binding protein CP29.3, chloroplastic; AltName: Full=LHCB4.3; AltName: Full=LHCII protein 4.3; Flags: Precursor;	-1.87732	0.000422471	0.00671883	down	NPS233-1_vs_NPS233-2
Glyma.08G175800	RecName: Full=(S)-2-hydroxy-acid oxidase GLO1; EC=1.1.3.15; AltName: Full=Glycolate oxidase 1; Short=AtGLO1; Short=GOX 1; AltName: Full=Short chain alpha-hydroxy acid oxidase GLO1;	-1.87698	0.0012496	0.0159696	down	NPS233-1_vs_NPS233-2
Glyma.08G126800	RecName: Full=Ferredoxin, chloroplastic; AltName: Full=PFLP; Flags: Precursor;	-1.87622	3.35755e-06	0.000124173	down	NPS233-1_vs_NPS233-2
Glyma.13G268000	RecName: Full=Gamma-glutamyl hydrolase 2; Short=AtGGH2; EC=3.4.19.9; AltName: Full=Conjugase; AltName: Full=GH; AltName: Full=Gamma-Glu-X carboxypeptidase; Flags: Precursor;	-1.87488	3.12979e-09	2.7312e-07	down	NPS233-1_vs_NPS233-2
Glyma.10G059500	RecName: Full=Triosephosphate isomerase, chloroplastic; Short=TIM; Short=Triose-phosphate isomerase; EC=5.3.1.1; Flags: Precursor;	-1.87079	7.37876e-05	0.00161209	down	NPS233-1_vs_NPS233-2
Glyma.16G165800	RecName: Full=Chlorophyll a-b binding protein 3, chloroplastic; AltName: Full=LHCII type I CAB-3; Short=LHCP; Flags: Precursor;	-1.86879	0.000155964	0.0029607	down	NPS233-1_vs_NPS233-2
Glyma.20G249800	--	-1.86831	3.19733e-07	1.6777e-05	down	NPS233-1_vs_NPS233-2
Glyma.13G236100	RecName: Full=Protein E6;	-1.86704	2.89384e-06	0.000109666	down	NPS233-1_vs_NPS233-2
Glyma.13G129400	RecName: Full=Photosystem I reaction center subunit IV A, chloroplastic; Short=PSI-E A; Contains: RecName: Full=Photosystem I reaction center subunit IV A isoform 2; Flags: Precursor;	-1.86518	1.51514e-06	6.25117e-05	down	NPS233-1_vs_NPS233-2
Glyma.18G245500	--	-1.86518	7.26329e-09	5.94544e-07	down	NPS233-1_vs_NPS233-2
Glyma.04G103900	RecName: Full=Ethylene-responsive transcription factor RAP2-4; AltName: Full=Ethylene-responsive transcription factor ERF059; AltName: Full=Protein RELATED TO APETALA2 4;	-1.86306	6.54015e-05	0.00146967	down	NPS233-1_vs_NPS233-2
Glyma.06G268700	RecName: Full=TMV resistance protein N;	-1.85998	9.98958e-05	0.00206353	down	NPS233-1_vs_NPS233-2
Glyma.13G236200	--	-1.85912	0.0037313	0.0375159	down	NPS233-1_vs_NPS233-2
Glyma.02G224900	RecName: Full=Transcription factor DIVARICATA;	-1.85609	0.00331736	0.0342301	down	NPS233-1_vs_NPS233-2
Glyma.12G147700	RecName: Full=Protein LAZ1 homolog 1 {ECO:0000303|PubMed:20830211}; AltName: Full=Lazarus1 homolog 1 {ECO:0000303|PubMed:20830211}; Flags: Precursor;	-1.85605	2.67867e-06	0.000103286	down	NPS233-1_vs_NPS233-2
Glyma.02G143100	--	-1.85507	0.000415562	0.0066542	down	NPS233-1_vs_NPS233-2
Glyma.03G257000	RecName: Full=Cyclic nucleotide-gated ion channel 1; Short=AtCNGC1; AltName: Full=Cyclic nucleotide- and calmodulin-regulated ion channel 1;	-1.8502	0.00160769	0.0195243	down	NPS233-1_vs_NPS233-2
Glyma.02G057900	--	-1.84935	0.000909533	0.0122613	down	NPS233-1_vs_NPS233-2
Glyma.05G172300	RecName: Full=Photosystem II core complex proteins psbY, chloroplastic; AltName: Full=L-arginine-metabolizing enzyme; Short=L-AME; Contains: RecName: Full=Photosystem II protein psbY-1, chloroplastic; AltName: Full=psbY-A1; Contains: RecName: Full=Photosystem II protein psbY-2, chloroplastic; AltName: Full=psbY-A2; Flags: Precursor;	-1.84661	1.78041e-05	0.00050175	down	NPS233-1_vs_NPS233-2
Glyma.10G162400	RecName: Full=Auxin-induced protein AUX28;	-1.84562	0.000111983	0.00225257	down	NPS233-1_vs_NPS233-2
Glyma.03G109400	--	-1.84462	0.000455384	0.00714646	down	NPS233-1_vs_NPS233-2
Glyma.07G060700	RecName: Full=Protein CURVATURE THYLAKOID 1A, chloroplastic; Flags: Precursor;	-1.84396	7.52645e-05	0.00163736	down	NPS233-1_vs_NPS233-2
Glyma.12G002500	RecName: Full=Receptor protein-tyrosine kinase CEPR2 {ECO:0000303|PubMed:25324386}; EC=2.7.10.1 {ECO:0000255|PROSITE-ProRule:PRU10027}; AltName: Full=Protein C-TERMINALLY ENCODED PEPTIDE RECEPTOR 2 {ECO:0000303|PubMed:25324386}; Flags: Precursor;	-1.84315	0.000410015	0.00658254	down	NPS233-1_vs_NPS233-2
Glyma.16G055800	RecName: Full=Protein NUCLEAR FUSION DEFECTIVE 4 {ECO:0000303|PubMed:16698901};	-1.83993	1.93572e-05	0.000538216	down	NPS233-1_vs_NPS233-2
Glyma.10G107700	RecName: Full=Calcium-transporting ATPase 4, plasma membrane-type; EC=3.6.3.8; AltName: Full=Ca(2+)-ATPase isoform 4;	-1.8356	0.00336258	0.034602	down	NPS233-1_vs_NPS233-2
Glyma.19G184300	RecName: Full=ABC transporter B family member 1; Short=ABC transporter ABCB.1; Short=AtABCB1; AltName: Full=Multidrug resistance protein 1; AltName: Full=P-glycoprotein 1; Short=AtPgp1;	-1.83363	0.000171449	0.00322476	down	NPS233-1_vs_NPS233-2
Glyma.20G158300	RecName: Full=Transmembrane ascorbate ferrireductase 1; EC=1.16.5.1; AltName: Full=Cytochrome b561; Short=Artb561-1; Short=AtCytb561; AltName: Full=Protein b561A.tha5; AltName: Full=Tonoplast Cyt-b561; Short=TCytb;	-1.82945	0.000405721	0.00652385	down	NPS233-1_vs_NPS233-2
Glyma.20G083500	--	-1.82891	0.00189205	0.0222447	down	NPS233-1_vs_NPS233-2
Glyma.02G277300	RecName: Full=Late embryogenesis abundant protein Lea14-A;	-1.82588	0.00165403	0.0199341	down	NPS233-1_vs_NPS233-2
Glyma.13G304400	RecName: Full=Xyloglucan endotransglucosylase/hydrolase protein 9; Short=At-XTH9; Short=XTH-9; EC=2.4.1.207; Flags: Precursor;	-1.82573	0.00530235	0.0488772	down	NPS233-1_vs_NPS233-2
Glyma.05G128700	--	-1.82515	0.000208119	0.00377343	down	NPS233-1_vs_NPS233-2
Glyma.01G039200	RecName: Full=Transcription factor BHLH094 {ECO:0000305}; AltName: Full=Basic helix-loop-helix protein 94 {ECO:0000303|PubMed:16896230}; Short=OsbHLH094 {ECO:0000303|PubMed:16896230}; AltName: Full=bHLH transcription factor bHLH094 {ECO:0000305};	-1.82385	0.00519275	0.0481707	down	NPS233-1_vs_NPS233-2
Glyma.03G262300	RecName: Full=Chlorophyll a-b binding protein 7, chloroplastic; AltName: Full=LHCI type II CAB-7; Flags: Precursor;	-1.82166	4.20828e-06	0.000150381	down	NPS233-1_vs_NPS233-2
Glyma.06G069100	--	-1.81833	2.37158e-06	9.36912e-05	down	NPS233-1_vs_NPS233-2
Glyma.20G171300	--	-1.8157	0.000440424	0.0069472	down	NPS233-1_vs_NPS233-2
Glyma.09G284300	RecName: Full=Transcription factor TCP7;	-1.81377	0.00123404	0.0157966	down	NPS233-1_vs_NPS233-2
Glyma.01G154900	RecName: Full=Probable carotenoid cleavage dioxygenase 4, chloroplastic; Short=AtCCD4; EC=1.14.99.-; AltName: Full=AtNCED4; Flags: Precursor;	-1.81339	0.00304737	0.0322336	down	NPS233-1_vs_NPS233-2
Glyma.12G171000	RecName: Full=Auxin response factor 4;	-1.81119	2.24316e-05	0.000609345	down	NPS233-1_vs_NPS233-2
Glyma.11G176500	RecName: Full=Transcription factor DIVARICATA;	-1.80947	0.000822549	0.0113377	down	NPS233-1_vs_NPS233-2
Glyma.19G220200	RecName: Full=S-adenosylmethionine synthase 1; Short=AdoMet synthase 1; EC=2.5.1.6 {ECO:0000250|UniProtKB:Q96551}; AltName: Full=Methionine adenosyltransferase 1; Short=MAT 1;	-1.80569	1.56878e-07	8.96746e-06	down	NPS233-1_vs_NPS233-2
Glyma.08G080500	RecName: Full=Berberine bridge enzyme-like 21 {ECO:0000303|PubMed:26037923}; Short=AtBBE-like 21 {ECO:0000303|PubMed:26037923}; EC=1.1.1.- {ECO:0000250|UniProtKB:O64743}; Flags: Precursor;	-1.80357	0.00131971	0.016657	down	NPS233-1_vs_NPS233-2
Glyma.01G231900	--	-1.80306	0.00128131	0.0162798	down	NPS233-1_vs_NPS233-2
Glyma.19G211000	RecName: Full=Universal stress protein A-like protein;	-1.80304	0.00216018	0.024641	down	NPS233-1_vs_NPS233-2
Glyma.07G125900	RecName: Full=Acid phosphatase 1; EC=3.1.3.2; AltName: Full=Apase-1(1); Flags: Precursor;	-1.8023	8.13981e-05	0.0017494	down	NPS233-1_vs_NPS233-2
Glyma.12G199400	RecName: Full=Cytochrome b6-f complex iron-sulfur subunit, chloroplastic; EC=1.10.9.1; AltName: Full=Plastohydroquinone:plastocyanin oxidoreductase iron-sulfur protein; AltName: Full=Rieske iron-sulfur protein; Short=ISP; Short=RISP; Flags: Precursor;	-1.79823	0.00100427	0.013322	down	NPS233-1_vs_NPS233-2
Glyma.10G011700	--	-1.79257	0.00104389	0.0137289	down	NPS233-1_vs_NPS233-2
Glyma.13G221400	RecName: Full=Auxin response factor 6;	-1.7924	0.00101814	0.0134536	down	NPS233-1_vs_NPS233-2
Glyma.06G003900	RecName: Full=Actin-depolymerizing factor 5; Short=ADF-5; Short=AtADF5;	-1.78834	0.00416006	0.0406032	down	NPS233-1_vs_NPS233-2
Glyma.05G154600	RecName: Full=Protein YLS3; AltName: Full=Protein YELLOW-LEAF-SPECIFIC GENE 3; AltName: Full=Xylogen-like protein 9; Short=AtXYLP9; Flags: Precursor;	-1.7803	1.04792e-05	0.00032492	down	NPS233-1_vs_NPS233-2
Glyma.11G110000	RecName: Full=Epimerase family protein SDR39U1 homolog, chloroplastic {ECO:0000305}; EC=1.1.1.-; AltName: Full=Protein GIANT CHLOROPLAST 1 {ECO:0000303|PubMed:15120068}; AltName: Full=Protein SulA homolog {ECO:0000303|PubMed:15208387}; Short=AtSulA {ECO:0000303|PubMed:15208387}; Flags: Precursor;	-1.77622	0.0016156	0.0195785	down	NPS233-1_vs_NPS233-2
Glyma.13G279500	--	-1.77603	1.95691e-06	7.87863e-05	down	NPS233-1_vs_NPS233-2
Glyma.02G105400	RecName: Full=Protein IRX15-LIKE;	-1.77488	0.000836948	0.0115	down	NPS233-1_vs_NPS233-2
Glyma.18G263900	RecName: Full=Cyclic nucleotide-gated ion channel 2; Short=AtCNGC2; AltName: Full=Cyclic nucleotide- and calmodulin-regulated ion channel 2; AltName: Full=Protein DEFENSE NO DEATH 1;	-1.77377	4.12861e-06	0.000148572	down	NPS233-1_vs_NPS233-2
Glyma.08G239900	RecName: Full=Patellin-3;	-1.77188	0.00284107	0.0306213	down	NPS233-1_vs_NPS233-2
Glyma.10G018400	RecName: Full=UDP-glucuronic acid decarboxylase 2; EC=4.1.1.35; AltName: Full=UDP-XYL synthase 2; AltName: Full=UDP-glucuronate decarboxylase 2; Short=UGD; Short=UXS-2; AltName: Full=dTDP-glucose 4-6-dehydratase homolog D18;	-1.77021	2.8068e-05	0.00074082	down	NPS233-1_vs_NPS233-2
Glyma.08G145600	RecName: Full=Cellulose synthase A catalytic subunit 6 [UDP-forming]; Short=AtCesA6; EC=2.4.1.12; AltName: Full=AraxCelA; AltName: Full=Isoxaben-resistant protein 2; AltName: Full=Protein PROCUSTE 1; AltName: Full=Protein QUILL;	-1.76791	0.000374927	0.00613473	down	NPS233-1_vs_NPS233-2
Glyma.06G109300	RecName: Full=30S ribosomal protein S13, chloroplastic; AltName: Full=CS13; Flags: Precursor;	-1.76532	0.00356892	0.0362005	down	NPS233-1_vs_NPS233-2
Glyma.02G072500	--	-1.76274	0.00465614	0.0442766	down	NPS233-1_vs_NPS233-2
Glyma.13G048500	RecName: Full=2-oxoglutarate-dependent dioxygenase DAO; EC=1.14.11.-; AltName: Full=Protein DIOXYGENASE FOR AUXIN OXIDATION;	-1.7594	0.00241859	0.0268828	down	NPS233-1_vs_NPS233-2
Glyma.07G074700	RecName: Full=NAD-dependent malic enzyme 59 kDa isoform, mitochondrial; Short=NAD-ME; EC=1.1.1.39; Flags: Precursor;	-1.75291	0.000718462	0.0102529	down	NPS233-1_vs_NPS233-2
Glyma.01G238000	RecName: Full=Ferredoxin-3, chloroplastic; Short=AtFd3; Flags: Precursor;	-1.75258	0.00431442	0.0417316	down	NPS233-1_vs_NPS233-2
Glyma.06G141100	RecName: Full=Probable inactive receptor kinase At5g58300; Flags: Precursor;	-1.7513	0.000210171	0.00379994	down	NPS233-1_vs_NPS233-2
Glyma.19G036100	RecName: Full=7-deoxyloganetin glucosyltransferase; EC=2.4.1.324; AltName: Full=Genipin glucosyltransferase; AltName: Full=UDP-glucose glucosyltransferase 2; Short=GjUGT2; AltName: Full=UDP-glycosyltransferase 85A24;	-1.74964	0.005168	0.0479846	down	NPS233-1_vs_NPS233-2
Glyma.11G053000	RecName: Full=Probable beta-1,4-xylosyltransferase IRX14H; EC=2.4.2.-; AltName: Full=Protein IRREGULAR XYLEM 14 homolog; AltName: Full=Xylan xylosyltransferase IRX14H;	-1.74963	0.00132085	0.0166646	down	NPS233-1_vs_NPS233-2
Glyma.09G222800	RecName: Full=Tocopherol O-methyltransferase, chloroplastic; EC=2.1.1.95; AltName: Full=Gamma-tocopherol methyltransferase; AltName: Full=Vitamin E pathway gene 4 protein; Short=AtVTE4; Flags: Precursor;	-1.74883	0.000261126	0.00454653	down	NPS233-1_vs_NPS233-2
Glyma.04G222100	RecName: Full=Expansin-A8; Short=AtEXPA8; AltName: Full=Alpha-expansin-8; Short=At-EXP8; Short=AtEx8; AltName: Full=Ath-ExpAlpha-1.11; Flags: Precursor;	-1.7476	0.00449072	0.0431176	down	NPS233-1_vs_NPS233-2
Glyma.18G035300	RecName: Full=Thylakoid lumenal 15 kDa protein 1, chloroplastic; AltName: Full=p15; Flags: Precursor;	-1.74678	0.00104782	0.0137629	down	NPS233-1_vs_NPS233-2
Glyma.13G364900	RecName: Full=Phospholipase D alpha 1; Short=PLD 1; EC=3.1.4.4; AltName: Full=Choline phosphatase 1; AltName: Full=Phosphatidylcholine-hydrolyzing phospholipase D 1; Flags: Precursor;	-1.74409	0.000222624	0.00399162	down	NPS233-1_vs_NPS233-2
Glyma.11G242200	RecName: Full=Homeobox-leucine zipper protein ATHB-6; AltName: Full=HD-ZIP protein ATHB-6; AltName: Full=Homeodomain transcription factor ATHB-6;	-1.74376	0.000789381	0.0110035	down	NPS233-1_vs_NPS233-2
Glyma.19G160500	--	-1.74192	7.03572e-05	0.0015515	down	NPS233-1_vs_NPS233-2
Glyma.17G130100	RecName: Full=ATP synthase delta chain, chloroplastic; AltName: Full=F-ATPase delta chain; Flags: Precursor;	-1.73901	0.000748762	0.0105791	down	NPS233-1_vs_NPS233-2
Glyma.12G026900	RecName: Full=Photosystem II stability/assembly factor HCF136, chloroplastic; Flags: Precursor;	-1.73863	0.000179985	0.00334838	down	NPS233-1_vs_NPS233-2
Glyma.11G189600	RecName: Full=Glucomannan 4-beta-mannosyltransferase 2; EC=2.4.1.32; AltName: Full=Cellulose synthase-like protein A2; Short=AtCslA2; AltName: Full=Glucomannan synthase; AltName: Full=Mannan synthase 2;	-1.73769	6.25943e-06	0.000211142	down	NPS233-1_vs_NPS233-2
Glyma.04G015900	RecName: Full=Glyceraldehyde-3-phosphate dehydrogenase B, chloroplastic; EC=1.2.1.13; AltName: Full=NADP-dependent glyceraldehydephosphate dehydrogenase subunit B; Flags: Precursor;	-1.73082	0.000181577	0.00337034	down	NPS233-1_vs_NPS233-2
Glyma.13G301200	--	-1.72995	0.00309341	0.0325636	down	NPS233-1_vs_NPS233-2
Glyma.16G058500	RecName: Full=Uncharacterized protein At3g27210;	-1.72837	0.000339264	0.00564752	down	NPS233-1_vs_NPS233-2
Glyma.04G236200	RecName: Full=Probable pectinesterase/pectinesterase inhibitor 61; Includes: RecName: Full=Pectinesterase inhibitor 61; AltName: Full=Pectin methylesterase inhibitor 61; Includes: RecName: Full=Pectinesterase 61; Short=PE 61; EC=3.1.1.11; AltName: Full=AtPMEpcrF; AltName: Full=Pectin methylesterase 61; Short=AtPME61;	-1.72714	3.92189e-05	0.000970076	down	NPS233-1_vs_NPS233-2
Glyma.20G180100	RecName: Full=GATA transcription factor 8;	-1.72257	0.000968141	0.0129508	down	NPS233-1_vs_NPS233-2
Glyma.06G015900	RecName: Full=Glyceraldehyde-3-phosphate dehydrogenase B, chloroplastic; EC=1.2.1.13; AltName: Full=NADP-dependent glyceraldehydephosphate dehydrogenase subunit B; Flags: Precursor;	-1.72235	0.00544594	0.0498267	down	NPS233-1_vs_NPS233-2
Glyma.06G069600	RecName: Full=Cellulose synthase A catalytic subunit 1 [UDP-forming]; Short=AtCesA1; EC=2.4.1.12; AltName: Full=Protein RADIALLY SWOLLEN 1; Short=AtRSW1;	-1.71883	7.08744e-06	0.000234183	down	NPS233-1_vs_NPS233-2
Glyma.05G152000	RecName: Full=Adenosylhomocysteinase; Short=AdoHcyase; EC=3.3.1.1; AltName: Full=S-adenosyl-L-homocysteine hydrolase;	-1.71328	7.07112e-07	3.34961e-05	down	NPS233-1_vs_NPS233-2
Glyma.08G185800	RecName: Full=Probable plastid-lipid-associated protein 4, chloroplastic; AltName: Full=Fibrillin-3a; AltName: Full=Plastoglobulin 25; Short=AtPGL25; Flags: Precursor;	-1.712	0.00300681	0.0318815	down	NPS233-1_vs_NPS233-2
Glyma.08G108900	RecName: Full=Serine hydroxymethyltransferase 4; Short=AtSHMT4; EC=2.1.2.1; AltName: Full=Glycine hydroxymethyltransferase 4; AltName: Full=Serine methylase 4;	-1.71128	0.00134501	0.0169138	down	NPS233-1_vs_NPS233-2
Glyma.01G188200	RecName: Full=Filament-like plant protein 7; Short=AtFPP7;	-1.7086	0.00205418	0.0237317	down	NPS233-1_vs_NPS233-2
Glyma.15G165100	RecName: Full=Subtilisin-like protease SBT2.6 {ECO:0000303|PubMed:16193095}; EC=3.4.21.- {ECO:0000255|PROSITE-ProRule:PRU10082}; AltName: Full=Subtilase subfamily 2 member 6 {ECO:0000303|PubMed:16193095}; Short=AtSBT2.6 {ECO:0000303|PubMed:16193095}; Flags: Precursor;	-1.70518	0.00102225	0.0134938	down	NPS233-1_vs_NPS233-2
Glyma.05G159400	RecName: Full=Shaggy-related protein kinase eta {ECO:0000303|PubMed:9611268}; EC=2.7.11.1 {ECO:0000269|PubMed:11847343, ECO:0000269|PubMed:12428015}; AltName: Full=ASK-eta {ECO:0000303|PubMed:10080716}; AltName: Full=Protein BRASSINOSTEROID INSENSITIVE 2 {ECO:0000303|PubMed:11847343}; AltName: Full=Protein ULTRACURVATA 1 {ECO:0000303|PubMed:11820813}; AltName: Full=Shaggy-related protein kinase 2…	-1.7042	0.00150869	0.0185614	down	NPS233-1_vs_NPS233-2
Glyma.12G191400	RecName: Full=Fatty acid hydroperoxide lyase, chloroplastic {ECO:0000303|PubMed:10859201}; Short=LeHPL {ECO:0000303|PubMed:10859201}; EC=4.2.99.- {ECO:0000305}; AltName: Full=Cytochrome P450 74B {ECO:0000305};	-1.70387	0.00444274	0.0427506	down	NPS233-1_vs_NPS233-2
Glyma.06G011700	RecName: Full=Glucose-1-phosphate adenylyltransferase large subunit 1; EC=2.7.7.27; AltName: Full=ADP-glucose pyrophosphorylase; AltName: Full=ADP-glucose synthase; AltName: Full=AGPase S; AltName: Full=Alpha-D-glucose-1-phosphate adenyl transferase; Flags: Fragment;	-1.70358	0.000373528	0.00611836	down	NPS233-1_vs_NPS233-2
Glyma.11G112100	RecName: Full=Protein DETOXIFICATION 46, chloroplastic {ECO:0000303|PubMed:11739388}; Short=AtDTX46 {ECO:0000303|PubMed:11739388}; AltName: Full=Multidrug and toxic compound extrusion protein 46 {ECO:0000305}; Short=MATE protein 46 {ECO:0000305}; AltName: Full=Protein EDS5 HOMOLOGUE {ECO:0000303|PubMed:26055508}; Flags: Precursor;	-1.70226	0.00158138	0.019301	down	NPS233-1_vs_NPS233-2
Glyma.20G019600	RecName: Full=Glycine cleavage system H protein 2, mitochondrial; Flags: Precursor;	-1.69787	0.00110728	0.0144143	down	NPS233-1_vs_NPS233-2
Glyma.13G113200	RecName: Full=Peroxiredoxin Q, chloroplastic; EC=1.11.1.15; AltName: Full=Thioredoxin peroxidase; Flags: Precursor;	-1.69626	0.0033416	0.0344092	down	NPS233-1_vs_NPS233-2
Glyma.15G015600	RecName: Full=Sulfite exporter TauE/SafE family protein 3 {ECO:0000312|EMBL:AEC07746.1};	-1.69045	0.00352951	0.0358985	down	NPS233-1_vs_NPS233-2
Glyma.06G321900	RecName: Full=Photosystem I reaction center subunit V, chloroplastic; AltName: Full=PSI-G; Flags: Precursor;	-1.69012	3.56768e-05	0.000900093	down	NPS233-1_vs_NPS233-2
Glyma.03G197000	RecName: Full=Rho GTPase-activating protein 1; AltName: Full=Rho-type GTPase-activating protein 1;	-1.68792	0.000764358	0.010743	down	NPS233-1_vs_NPS233-2
Glyma.03G183600	RecName: Full=ABC transporter B family member 1; Short=ABC transporter ABCB.1; Short=AtABCB1; AltName: Full=Multidrug resistance protein 1; AltName: Full=P-glycoprotein 1; Short=AtPgp1;	-1.68698	0.00019878	0.0036342	down	NPS233-1_vs_NPS233-2
Glyma.15G275600	RecName: Full=Photosystem II 5 kDa protein, chloroplastic; Short=PSII-T; AltName: Full=Light-regulated unknown 11 kDa protein; Flags: Precursor;	-1.68461	5.08428e-05	0.00119775	down	NPS233-1_vs_NPS233-2
Glyma.04G118700	RecName: Full=21 kDa protein; AltName: Full=1.2 protein; Flags: Precursor;	-1.68401	5.00639e-05	0.00118486	down	NPS233-1_vs_NPS233-2
Glyma.03G239800	RecName: Full=Heavy metal-associated isoprenylated plant protein 32 {ECO:0000303|PubMed:21072340, ECO:0000303|PubMed:23368984}; Short=AtHIP32 {ECO:0000303|PubMed:21072340, ECO:0000303|PubMed:23368984}; Flags: Precursor;	-1.67235	0.00232564	0.026073	down	NPS233-1_vs_NPS233-2
Glyma.10G081700	RecName: Full=BEL1-like homeodomain protein 1; Short=BEL1-like protein 1; AltName: Full=Protein EMBRYO SAC DEVELOPMENT ARREST 29;	-1.66701	0.00521161	0.0483018	down	NPS233-1_vs_NPS233-2
Glyma.07G257700	RecName: Full=Stem-specific protein TSJT1;	-1.66635	0.000288904	0.00495707	down	NPS233-1_vs_NPS233-2
Glyma.11G094800	--	-1.66517	0.00361584	0.0365586	down	NPS233-1_vs_NPS233-2
Glyma.08G104600	RecName: Full=Probable methyltransferase At1g27930; EC=2.1.1.- {ECO:0000305};	-1.66487	0.000530931	0.00805211	down	NPS233-1_vs_NPS233-2
Glyma.06G015000	RecName: Full=Monosaccharide-sensing protein 2; AltName: Full=Sugar transporter MSSP2;	-1.66472	0.000408332	0.00655896	down	NPS233-1_vs_NPS233-2
Glyma.06G094400	RecName: Full=14-3-3-like protein B; AltName: Full=SGF14B; Flags: Fragment;	-1.6641	0.000363527	0.00598009	down	NPS233-1_vs_NPS233-2
Glyma.06G047000	RecName: Full=LIM domain-containing protein WLIM1 {ECO:0000305}; AltName: Full=Widely-expressed LIM protein 1 {ECO:0000303|PubMed:11085265}; Short=AtWLIM1;	-1.6633	5.09488e-06	0.00017696	down	NPS233-1_vs_NPS233-2
Glyma.08G005900	RecName: Full=Respiratory burst oxidase homolog protein C; EC=1.11.1.-; EC=1.6.3.-; AltName: Full=NADPH oxidase RBOHC; AltName: Full=StRBOHC;	-1.66172	4.39807e-05	0.00105885	down	NPS233-1_vs_NPS233-2
Glyma.10G042100	RecName: Full=Photosystem I reaction center subunit IV A, chloroplastic; Short=PSI-E A; Contains: RecName: Full=Photosystem I reaction center subunit IV A isoform 2; Flags: Precursor;	-1.65744	0.000223717	0.00400655	down	NPS233-1_vs_NPS233-2
Glyma.08G072400	RecName: Full=Copper-transporting ATPase PAA1, chloroplastic; EC=3.6.3.54; AltName: Full=Protein HEAVY METAL ATPASE 6; AltName: Full=Protein glucose insensitive root 1; Flags: Precursor;	-1.65742	0.00420449	0.0409267	down	NPS233-1_vs_NPS233-2
Glyma.05G139300	RecName: Full=L-Ala-D/L-amino acid epimerase; EC=5.1.1.-; AltName: Full=L-Ala-D/L-Xxx epimerase;	-1.657	0.000204888	0.00371925	down	NPS233-1_vs_NPS233-2
Glyma.14G016300	RecName: Full=Zinc finger CCCH domain-containing protein 29; Short=AtC3H29; AltName: Full=AtSZF2;	-1.6569	0.00346279	0.0353723	down	NPS233-1_vs_NPS233-2
Glyma.15G181600	RecName: Full=Pectinesterase inhibitor 3 {ECO:0000305}; AltName: Full=Pectin methylesterase inhibitor 3 {ECO:0000303|PubMed:19097903}; Short=AtPMEI3 {ECO:0000303|PubMed:28082716}; Flags: Precursor;	-1.65102	0.000590608	0.00877507	down	NPS233-1_vs_NPS233-2
Glyma.09G234200	RecName: Full=Probable RNA-binding protein ARP1; AltName: Full=ABA-regulated RNA-binding protein 1 {ECO:0000303|PubMed:23040517};	-1.65004	3.10023e-05	0.00080105	down	NPS233-1_vs_NPS233-2
Glyma.06G162300	RecName: Full=Respiratory burst oxidase homolog protein C; EC=1.11.1.-; EC=1.6.3.-; AltName: Full=NADPH oxidase RBOHC; AltName: Full=StRBOHC;	-1.65	0.000819964	0.0113173	down	NPS233-1_vs_NPS233-2
Glyma.01G104800	RecName: Full=Aldehyde oxidase GLOX {ECO:0000305}; EC=1.2.3.1 {ECO:0000305}; AltName: Full=Glyoxal oxidase {ECO:0000303|Ref.1}; Short=VpGLOX {ECO:0000303|PubMed:20512385}; Flags: Precursor;	-1.64929	0.000253931	0.004449	down	NPS233-1_vs_NPS233-2
Glyma.03G210100	RecName: Full=Glutaredoxin-C13; Short=AtGrxC13; AltName: Full=Protein ROXY 9;	-1.64294	0.00062133	0.0091299	down	NPS233-1_vs_NPS233-2
Glyma.16G203100	RecName: Full=CDGSH iron-sulfur domain-containing protein NEET; Short=At-NEET;	-1.63716	6.69788e-05	0.00149417	down	NPS233-1_vs_NPS233-2
Glyma.12G187700	RecName: Full=Serine/threonine-protein kinase Nek5; EC=2.7.11.1; AltName: Full=NimA-related protein kinase 5; Short=AtNEK6; Short=AtNek5;	-1.6363	0.00473994	0.0449204	down	NPS233-1_vs_NPS233-2
Glyma.02G240200	RecName: Full=Phytoene synthase, chloroplastic; EC=2.5.1.32; AltName: Full=MEL5; Flags: Precursor;	-1.63621	0.0031006	0.0326057	down	NPS233-1_vs_NPS233-2
Glyma.03G209400	RecName: Full=Protein TRANSPORT INHIBITOR RESPONSE 1; AltName: Full=Weak ethylene-insensitive protein 1;	-1.63605	0.000146571	0.00281018	down	NPS233-1_vs_NPS233-2
Glyma.07G253300	RecName: Full=Uncharacterized protein At4g15545;	-1.6353	0.00206123	0.0237863	down	NPS233-1_vs_NPS233-2
Glyma.13G101400	RecName: Full=Caffeoylshikimate esterase; EC=3.1.1.-; AltName: Full=Lysophospholipase 2; Short=LysoPL2;	-1.63473	0.000177037	0.00331132	down	NPS233-1_vs_NPS233-2
Glyma.05G053300	RecName: Full=Methylsterol monooxygenase 1-1; EC=1.14.18.9 {ECO:0000269|PubMed:14653780}; AltName: Full=Sterol 4-alpha-methyl-oxidase 1-1; Short=AtSMO1-1;	-1.63397	7.4543e-06	0.000243865	down	NPS233-1_vs_NPS233-2
Glyma.02G056200	RecName: Full=Sugar transporter ERD6-like 6;	-1.63239	0.00032394	0.00544858	down	NPS233-1_vs_NPS233-2
Glyma.18G299200	RecName: Full=Protein NRT1/ PTR FAMILY 6.1; Short=AtNPF6.1;	-1.63197	0.00265265	0.0289875	down	NPS233-1_vs_NPS233-2
Glyma.14G208500	RecName: Full=Auxin response factor 8; AltName: Full=Protein FRUIT WITHOUT FERTILIZATION;	-1.63139	0.00130475	0.0165089	down	NPS233-1_vs_NPS233-2
Glyma.10G042000	RecName: Full=Photosystem I reaction center subunit IV A, chloroplastic; Short=PSI-E A; Contains: RecName: Full=Photosystem I reaction center subunit IV A isoform 2; Flags: Precursor;	-1.63077	0.0002102	0.00379994	down	NPS233-1_vs_NPS233-2
Glyma.11G044200	RecName: Full=Tubulin alpha chain;	-1.62932	0.00203421	0.0235276	down	NPS233-1_vs_NPS233-2
Glyma.14G083000	--	-1.62632	0.000504887	0.00772968	down	NPS233-1_vs_NPS233-2
Glyma.17G239000	RecName: Full=Cysteine proteinase RD21A {ECO:0000305}; EC=3.4.22.- {ECO:0000305}; AltName: Full=Protein RESPONSIVE TO DEHYDRATION 21 {ECO:0000303|PubMed:8325504}; Short=RD21 {ECO:0000303|PubMed:8325504}; Flags: Precursor;	-1.62603	0.000380212	0.00620376	down	NPS233-1_vs_NPS233-2
Glyma.05G198700	RecName: Full=Respiratory burst oxidase homolog protein C; EC=1.11.1.-; EC=1.6.3.-; AltName: Full=NADPH oxidase RBOHC; AltName: Full=StRBOHC;	-1.62552	0.0012644	0.0161113	down	NPS233-1_vs_NPS233-2
Glyma.10G157800	RecName: Full=Histidine-containing phosphotransfer protein 1;	-1.62332	0.00122746	0.0157189	down	NPS233-1_vs_NPS233-2
Glyma.12G162300	RecName: Full=30S ribosomal protein S20, chloroplastic {ECO:0000303|PubMed:10874039}; AltName: Full=Chloroplastic small ribosomal subunit protein bS20c {ECO:0000303|PubMed:28007896}; Flags: Precursor;	-1.62312	0.0053331	0.0490869	down	NPS233-1_vs_NPS233-2
Glyma.09G206000	RecName: Full=Uncharacterized membrane protein At4g09580;	-1.62306	9.82202e-05	0.00203983	down	NPS233-1_vs_NPS233-2
Glyma.12G075400	RecName: Full=Aquaporin PIP2-7; AltName: Full=Plasma membrane intrinsic protein 2-7; AltName: Full=ZmPIP2-7; AltName: Full=ZmPIP2;7;	-1.62073	6.5413e-06	0.000218489	down	NPS233-1_vs_NPS233-2
Glyma.11G008400	RecName: Full=Protein CDI {ECO:0000305}; AltName: Full=Protein CADMIUM INDUCED {ECO:0000303|PubMed:22569258};	-1.62014	0.001417	0.0176598	down	NPS233-1_vs_NPS233-2
Glyma.05G219800	RecName: Full=Trehalase; EC=3.2.1.28; AltName: Full=Alpha,alpha-trehalase; AltName: Full=Alpha,alpha-trehalose glucohydrolase; AltName: Full=Trehalase 1; Short=AtTRE1;	-1.61782	0.00282842	0.0305171	down	NPS233-1_vs_NPS233-2
Glyma.11G144800	RecName: Full=Receptor-like serine/threonine-protein kinase NCRK; EC=2.7.11.1; Flags: Precursor;	-1.61601	0.000468653	0.00730242	down	NPS233-1_vs_NPS233-2
Glyma.02G145100	RecName: Full=Sulfate transporter 3.1; AltName: Full=AST12; AltName: Full=AtST1;	-1.6158	0.00308308	0.0324909	down	NPS233-1_vs_NPS233-2
Glyma.20G244500	RecName: Full=Probable plastid-lipid-associated protein 12, chloroplastic; AltName: Full=Fibrillin-10; Flags: Precursor;	-1.60879	0.0024232	0.0269111	down	NPS233-1_vs_NPS233-2
Glyma.17G245600	RecName: Full=Probable disease resistance protein At4g33300;	-1.60684	0.00317862	0.0332029	down	NPS233-1_vs_NPS233-2
Glyma.03G216400	RecName: Full=Putative GTP diphosphokinase RSH1, chloroplastic; EC=2.7.6.5; AltName: Full=RelA/SpoT homolog 1; Short=AtRSH1; AltName: Full=ppGpp synthetase RSH1; Flags: Precursor;	-1.60087	0.00267238	0.0291512	down	NPS233-1_vs_NPS233-2
Glyma.06G132500	--	-1.59978	0.00090658	0.0122484	down	NPS233-1_vs_NPS233-2
Glyma.05G110000	--	-1.59633	0.00166369	0.0200244	down	NPS233-1_vs_NPS233-2
Glyma.19G010100	RecName: Full=Homeobox-leucine zipper protein HAT5; AltName: Full=HD-ZIP protein ATHB-1; AltName: Full=Homeodomain transcription factor ATHB-1; AltName: Full=Homeodomain-leucine zipper protein HAT5; Short=HD-ZIP protein 5;	-1.59057	0.000939128	0.0126215	down	NPS233-1_vs_NPS233-2
Glyma.13G357300	RecName: Full=Photosystem I reaction center subunit VI, chloroplastic; Short=PSI-H; AltName: Full=Light-harvesting complex I 11 kDa protein; Flags: Precursor;	-1.58749	0.000673233	0.00972955	down	NPS233-1_vs_NPS233-2
Glyma.20G161200	RecName: Full=Short-chain dehydrogenase TIC 32, chloroplastic; EC=1.1.1.-; AltName: Full=Translocon at the inner envelope membrane of chloroplasts 32; Short=PsTIC32;	-1.58558	0.000781809	0.0109382	down	NPS233-1_vs_NPS233-2
Glyma.11G128000	--	-1.58484	0.000300168	0.00512456	down	NPS233-1_vs_NPS233-2
Glyma.08G052800	RecName: Full=Peptidyl-prolyl cis-trans isomerase FKBP17-2, chloroplastic; Short=PPIase FKBP17-2; EC=5.2.1.8; AltName: Full=FK506-binding protein 17-2; Short=AtFKBP17-2; AltName: Full=Immunophilin FKBP17-2; AltName: Full=Rotamase; Flags: Precursor;	-1.58303	0.000623827	0.00915782	down	NPS233-1_vs_NPS233-2
Glyma.18G055300	RecName: Full=Peroxidase 4 {ECO:0000250|UniProtKB:Q42578}; EC=1.11.1.7; Flags: Precursor;	-1.58123	6.98293e-05	0.00154318	down	NPS233-1_vs_NPS233-2
Glyma.16G016100	RecName: Full=Chlorophyll a-b binding protein 7, chloroplastic; AltName: Full=LHCI type II CAB-7; Flags: Precursor;	-1.58089	0.00175173	0.0208982	down	NPS233-1_vs_NPS233-2
Glyma.06G083900	RecName: Full=Stress-response A/B barrel domain-containing protein HS1 {ECO:0000305}; AltName: Full=Pop3 family protein At3g17210 {ECO:0000305}; AltName: Full=Protein HEAT STABLE 1 {ECO:0000303|PubMed:17720140}; Short=AtHS1 {ECO:0000303|PubMed:17720140};	-1.57978	9.64233e-05	0.00201211	down	NPS233-1_vs_NPS233-2
Glyma.03G234400	--	-1.57625	0.000702569	0.0100729	down	NPS233-1_vs_NPS233-2
Glyma.01G132500	RecName: Full=Non-specific lipid-transfer protein 1; Short=LTP1; Flags: Precursor;	-1.57184	7.55783e-05	0.00164303	down	NPS233-1_vs_NPS233-2
Glyma.20G224400	RecName: Full=GDP-mannose 3,5-epimerase; Short=GDP-Man 3,5-epimerase; EC=5.1.3.18;	-1.57136	5.44093e-05	0.00127201	down	NPS233-1_vs_NPS233-2
Glyma.04G180000	RecName: Full=Nucleobase-ascorbate transporter 6; Short=AtNAT6;	-1.56922	5.33153e-06	0.000183678	down	NPS233-1_vs_NPS233-2
Glyma.15G209000	RecName: Full=50S ribosomal protein L13, chloroplastic; AltName: Full=CL13; AltName: Full=Protein EMBRYO DEFECTIVE 1473; Flags: Precursor;	-1.56907	0.000412376	0.00661353	down	NPS233-1_vs_NPS233-2
Glyma.11G118200	RecName: Full=Probable receptor-like serine/threonine-protein kinase At4g34500; EC=2.7.11.1;	-1.56902	0.000231325	0.00411877	down	NPS233-1_vs_NPS233-2
Glyma.17G072300	RecName: Full=Translation initiation factor IF3-2, chloroplastic {ECO:0000305}; Short=AtIF3-2 {ECO:0000303|PubMed:25630975}; AltName: Full=AtINFC-2 {ECO:0000303|PubMed:25630975}; AltName: Full=Protein SUPPRESSOR OF VARIEGATION 9 {ECO:0000303|PubMed:27535792}; Flags: Precursor;	-1.56879	0.00103959	0.0136926	down	NPS233-1_vs_NPS233-2
Glyma.05G120100	RecName: Full=Probable WRKY transcription factor 19; AltName: Full=WRKY DNA-binding protein 19;	-1.5662	0.0048164	0.0454626	down	NPS233-1_vs_NPS233-2
Glyma.07G182600	RecName: Full=Costars family protein;	-1.56444	0.000195669	0.00359226	down	NPS233-1_vs_NPS233-2
Glyma.03G223000	RecName: Full=S-adenosylmethionine synthase 1; Short=AdoMet synthase 1; EC=2.5.1.6 {ECO:0000250|UniProtKB:Q96551}; AltName: Full=Methionine adenosyltransferase 1; Short=MAT 1;	-1.55905	1.63082e-06	6.6746e-05	down	NPS233-1_vs_NPS233-2
Glyma.01G185900	--	-1.55866	0.00476198	0.0450737	down	NPS233-1_vs_NPS233-2
Glyma.03G008600	RecName: Full=Signal peptide peptidase-like 4; Short=AtSPPL4; EC=3.4.23.-; Flags: Precursor;	-1.55676	0.00296279	0.0315127	down	NPS233-1_vs_NPS233-2
Glyma.18G241700	RecName: Full=Photosystem I reaction center subunit XI, chloroplastic; Short=PSI-L; AltName: Full=PSI subunit V; Flags: Precursor;	-1.55245	2.86426e-05	0.000750823	down	NPS233-1_vs_NPS233-2
Glyma.08G222300	RecName: Full=Protein MANNAN SYNTHESIS-RELATED 1 {ECO:0000303|PubMed:22966747}; Short=AtMSR1 {ECO:0000303|PubMed:22966747}; EC=2.4.1.- {ECO:0000305}; AltName: Full=O-fucosyltransferase 25 {ECO:0000305}; Short=O-FucT-25 {ECO:0000305}; AltName: Full=O-fucosyltransferase family protein {ECO:0000312|EMBL:ARJ31429.1};	-1.54804	1.39775e-05	0.000410185	down	NPS233-1_vs_NPS233-2
Glyma.13G145200	RecName: Full=RNA-binding protein CP29B, chloroplastic {ECO:0000305}; AltName: Full=Ribonucleoprotein At2g37220; Flags: Precursor;	-1.54739	0.000105111	0.00213815	down	NPS233-1_vs_NPS233-2
Glyma.13G088700	RecName: Full=Annexin D1; AltName: Full=AnnAt1; AltName: Full=Annexin A1;	-1.54501	0.000398269	0.00643096	down	NPS233-1_vs_NPS233-2
Glyma.01G148800	RecName: Full=Protein PAM68, chloroplastic; AltName: Full=PHOTOSYNTHESIS AFFECTED MUTANT 68; Flags: Precursor;	-1.54277	0.00289162	0.0309812	down	NPS233-1_vs_NPS233-2
Glyma.01G118900	RecName: Full=Probable leucine-rich repeat receptor-like serine/threonine-protein kinase At3g14840; EC=2.7.11.1; Flags: Precursor;	-1.53805	0.000754407	0.0106396	down	NPS233-1_vs_NPS233-2
Glyma.11G239400	RecName: Full=PLAT domain-containing protein 2 {ECO:0000305}; Short=AtPLAT2 {ECO:0000303|PubMed:25396746}; Short=PLAT domain protein 2 {ECO:0000303|PubMed:25396746}; Flags: Precursor;	-1.5375	0.00358075	0.0362724	down	NPS233-1_vs_NPS233-2
Glyma.03G046300	--	-1.53749	0.000148718	0.00284072	down	NPS233-1_vs_NPS233-2
Glyma.16G044900	RecName: Full=Glyceraldehyde-3-phosphate dehydrogenase A, chloroplastic; EC=1.2.1.13; AltName: Full=NADP-dependent glyceraldehydephosphate dehydrogenase subunit A; Flags: Precursor;	-1.53467	0.00397518	0.0393113	down	NPS233-1_vs_NPS233-2
Glyma.20G116100	RecName: Full=50S ribosomal protein L15, chloroplastic; AltName: Full=CL15; Flags: Precursor; Fragment;	-1.53341	3.69183e-07	1.88874e-05	down	NPS233-1_vs_NPS233-2
Glyma.04G042900	RecName: Full=F-box protein GID2; AltName: Full=Protein SLEEPY 1;	-1.53196	0.00399861	0.0394559	down	NPS233-1_vs_NPS233-2
Glyma.13G270600	RecName: Full=14-3-3-like protein D; AltName: Full=SGF14D;	-1.52242	0.000725032	0.0103274	down	NPS233-1_vs_NPS233-2
Glyma.03G110100	RecName: Full=50S ribosomal protein L4, chloroplastic; AltName: Full=CL4; AltName: Full=R-protein L4; Flags: Precursor;	-1.52214	0.000518704	0.00789789	down	NPS233-1_vs_NPS233-2
Glyma.13G205800	RecName: Full=15.4 kDa class V heat shock protein; AltName: Full=15.4 kDa heat shock protein; Short=AtHsp15.4;	-1.51398	0.0054417	0.0498176	down	NPS233-1_vs_NPS233-2
Glyma.06G170300	RecName: Full=Probable inactive purple acid phosphatase 27; Flags: Precursor;	-1.51281	0.00269514	0.0293786	down	NPS233-1_vs_NPS233-2
Glyma.08G002700	RecName: Full=Aldehyde dehydrogenase family 3 member I1, chloroplastic; Short=AtALDH3; Short=Ath-ALDH3; EC=1.2.1.3; Flags: Precursor;	-1.5123	3.75798e-06	0.000136839	down	NPS233-1_vs_NPS233-2
novel.569	--	-1.51159	2.16459e-07	1.17186e-05	down	NPS233-1_vs_NPS233-2
Glyma.09G240800	RecName: Full=Thioredoxin H2; Short=AtTrxh2; AltName: Full=Thioredoxin 2; Short=AtTRX2;	-1.51112	5.68942e-05	0.00131806	down	NPS233-1_vs_NPS233-2
Glyma.17G069100	RecName: Full=Protein ECERIFERUM 3; AltName: Full=Protein FACELESS POLLEN 1; AltName: Full=Protein WAX2; AltName: Full=Protein YORE-YORE;	-1.5098	0.00292031	0.0312202	down	NPS233-1_vs_NPS233-2
Glyma.11G000900	--	-1.5081	0.00501539	0.0468939	down	NPS233-1_vs_NPS233-2
Glyma.13G063100	RecName: Full=Mini zinc finger protein 2; Short=AtMIF2;	-1.50509	0.0011238	0.0145861	down	NPS233-1_vs_NPS233-2
Glyma.06G049700	RecName: Full=Uncharacterized protein At3g49720;	-1.50264	0.000885309	0.0120405	down	NPS233-1_vs_NPS233-2
Glyma.19G106800	RecName: Full=Glyceraldehyde-3-phosphate dehydrogenase A, chloroplastic; EC=1.2.1.13; AltName: Full=NADP-dependent glyceraldehydephosphate dehydrogenase subunit A; Flags: Precursor;	-1.50212	0.00488779	0.0459857	down	NPS233-1_vs_NPS233-2
Glyma.11G154900	--	-1.50134	9.026e-07	4.05654e-05	down	NPS233-1_vs_NPS233-2
Glyma.10G139200	RecName: Full=Pectin acetylesterase 2 {ECO:0000303|PubMed:25115560}; EC=3.1.1.- {ECO:0000305}; Flags: Precursor;	-1.49845	0.00418292	0.0407616	down	NPS233-1_vs_NPS233-2
Glyma.14G190300	RecName: Full=Probable E3 ubiquitin-protein ligase XERICO; EC=2.3.2.27; AltName: Full=RING-type E3 ubiquitin transferase XERICO;	-1.49721	0.0013994	0.017476	down	NPS233-1_vs_NPS233-2
Glyma.07G244600	--	-1.49413	0.00348308	0.0355441	down	NPS233-1_vs_NPS233-2
Glyma.03G159100	RecName: Full=Photosystem II reaction center W protein, chloroplastic; AltName: Full=PSII 6.1 kDa protein; Flags: Precursor;	-1.49046	0.000604907	0.00893207	down	NPS233-1_vs_NPS233-2
Glyma.08G151700	RecName: Full=30S ribosomal protein 2, chloroplastic {ECO:0000303|PubMed:12605670}; AltName: Full=Chloroplastic small ribosomal subunit protein cS22 {ECO:0000250|UniProtKB:P82277}; AltName: Full=Plastid-specific 30S ribosomal protein 2, chloroplastic {ECO:0000303|PubMed:12605670}; Short=PSRP-2 {ECO:0000303|PubMed:12605670}; Flags: Precursor;	-1.48654	0.00239704	0.026698	down	NPS233-1_vs_NPS233-2
Glyma.20G116400	RecName: Full=Caffeoylshikimate esterase; EC=3.1.1.-; AltName: Full=Lysophospholipase 2; Short=LysoPL2;	-1.47919	0.00205526	0.0237352	down	NPS233-1_vs_NPS233-2
Glyma.04G167900	RecName: Full=Chlorophyll a-b binding protein P4, chloroplastic; AltName: Full=LHCI type III CAB-P4; Flags: Precursor;	-1.47573	0.00129454	0.0164	down	NPS233-1_vs_NPS233-2
Glyma.05G043200	RecName: Full=28 kDa ribonucleoprotein, chloroplastic; Short=28RNP; Flags: Precursor;	-1.46974	0.000998249	0.0132593	down	NPS233-1_vs_NPS233-2
Glyma.17G112100	RecName: Full=Probable serine/threonine-protein kinase PIX7 {ECO:0000305}; EC=2.7.11.1 {ECO:0000305};	-1.46955	0.00140929	0.0175852	down	NPS233-1_vs_NPS233-2
Glyma.03G202300	RecName: Full=BEL1-like homeodomain protein 1; Short=BEL1-like protein 1; AltName: Full=Protein EMBRYO SAC DEVELOPMENT ARREST 29;	-1.4693	0.0034777	0.0355128	down	NPS233-1_vs_NPS233-2
Glyma.03G109900	RecName: Full=Uclacyanin 1 {ECO:0000303|PubMed:9761472}; Flags: Precursor;	-1.46532	0.00149591	0.0184486	down	NPS233-1_vs_NPS233-2
Glyma.17G223200	RecName: Full=Transmembrane 9 superfamily member 9 {ECO:0000305}; AltName: Full=Endomembrane protein 2 {ECO:0000303|PubMed:22570441}; AltName: Full=Transmembrane nine protein 9 {ECO:0000303|PubMed:20681974}; Short=AtTMN9 {ECO:0000303|PubMed:20681974}; Flags: Precursor;	-1.46492	2.17616e-05	0.0005943	down	NPS233-1_vs_NPS233-2
Glyma.06G325300	RecName: Full=Methylenetetrahydrofolate reductase 2; Short=AtMTHFR2; EC=1.5.1.20;	-1.4618	0.0024257	0.0269292	down	NPS233-1_vs_NPS233-2
Glyma.11G030400	--	-1.45818	0.00194429	0.022736	down	NPS233-1_vs_NPS233-2
Glyma.08G007400	RecName: Full=Patellin-5;	-1.45548	0.00430803	0.0416896	down	NPS233-1_vs_NPS233-2
Glyma.12G239100	RecName: Full=Cytochrome P450 705A22 {ECO:0000303|PubMed:23284057}; EC=1.14.-.- {ECO:0000305}; AltName: Full=Protein GRAVITY PERSISTENCE SIGNAL 1 {ECO:0000303|PubMed:23284057};	-1.45493	0.00541109	0.0496558	down	NPS233-1_vs_NPS233-2
Glyma.18G137100	RecName: Full=Spermidine synthase 2; Short=SPDSY 2; EC=2.5.1.16; AltName: Full=Putrescine aminopropyltransferase 2;	-1.44711	5.74925e-05	0.00132791	down	NPS233-1_vs_NPS233-2
Glyma.06G109500	RecName: Full=Oxysterol-binding protein-related protein 1C; AltName: Full=OSBP-related protein 1C;	-1.44517	0.00483965	0.0456112	down	NPS233-1_vs_NPS233-2
Glyma.17G114800	--	-1.4451	0.00236416	0.0264372	down	NPS233-1_vs_NPS233-2
Glyma.08G077100	--	-1.44035	0.000550337	0.00827285	down	NPS233-1_vs_NPS233-2
Glyma.16G037900	--	-1.43853	0.000177653	0.00331704	down	NPS233-1_vs_NPS233-2
Glyma.06G057700	RecName: Full=Polyadenylate-binding protein-interacting protein 7; Short=PABP-interacting protein 7; Short=Poly(A)-binding protein-interacting protein 7; AltName: Full=PAM2-containing protein CID7; AltName: Full=Protein CTC-INTERACTING DOMAIN 7;	-1.43773	0.00381804	0.0381505	down	NPS233-1_vs_NPS233-2
Glyma.15G219100	RecName: Full=Metacaspase-4; Short=AtMC4; EC=3.4.22.-; AltName: Full=Metacaspase 2d; Short=AtMCP2d; AltName: Full=Metacaspase-7; Contains: RecName: Full=Metacaspase-4 subunit p20; Contains: RecName: Full=Metacaspase-4 subunit p10;	-1.43773	0.000432473	0.00684994	down	NPS233-1_vs_NPS233-2
Glyma.14G046700	--	-1.43696	0.00356394	0.0361768	down	NPS233-1_vs_NPS233-2
Glyma.15G266100	--	-1.4337	0.000376768	0.00616157	down	NPS233-1_vs_NPS233-2
Glyma.12G025400	RecName: Full=50S ribosomal protein L12-3, chloroplastic; AltName: Full=CL12-C; Flags: Precursor;	-1.43285	0.000120994	0.00239417	down	NPS233-1_vs_NPS233-2
Glyma.16G105300	RecName: Full=Probable methyltransferase PMT21; EC=2.1.1.-; AltName: Full=Protein EARLY-RESPONSIVE TO DEHYDRATION 3;	-1.4328	0.000582725	0.00869584	down	NPS233-1_vs_NPS233-2
Glyma.14G085800	RecName: Full=Cysteine proteinase RD21A {ECO:0000305}; EC=3.4.22.- {ECO:0000305}; AltName: Full=Protein RESPONSIVE TO DEHYDRATION 21 {ECO:0000303|PubMed:8325504}; Short=RD21 {ECO:0000303|PubMed:8325504}; Flags: Precursor;	-1.43213	1.65695e-05	0.000474015	down	NPS233-1_vs_NPS233-2
Glyma.08G108800	RecName: Full=Adenosylhomocysteinase; Short=AdoHcyase; EC=3.3.1.1; AltName: Full=Cytokinin-binding protein CBP57; AltName: Full=S-adenosyl-L-homocysteine hydrolase;	-1.43048	9.95951e-07	4.42389e-05	down	NPS233-1_vs_NPS233-2
Glyma.04G023400	RecName: Full=Rac-like GTP-binding protein RAC1; Flags: Precursor;	-1.42997	0.000931009	0.0125288	down	NPS233-1_vs_NPS233-2
Glyma.02G064700	RecName: Full=Chlorophyll a-b binding protein 6A, chloroplastic; AltName: Full=LHCI type I CAB-6A; AltName: Full=Light-harvesting complex I 26 kDa protein; Flags: Precursor;	-1.42421	0.00343871	0.0351681	down	NPS233-1_vs_NPS233-2
Glyma.02G260600	RecName: Full=Staphylococcal-like nuclease CAN2; EC=3.1.31.-; AltName: Full=Calcium-dependent nuclease 2; Short=AtCAN2; Short=Ca(2+)-dependent nuclease 2;	-1.42375	0.00138209	0.017295	down	NPS233-1_vs_NPS233-2
Glyma.10G134100	RecName: Full=28 kDa ribonucleoprotein, chloroplastic; Short=28RNP;	-1.42264	0.00451173	0.0432456	down	NPS233-1_vs_NPS233-2
Glyma.08G086700	RecName: Full=UDP-N-acetylglucosamine diphosphorylase 1; EC=2.7.7.23; AltName: Full=N-acetylglucosamine-1-phosphate uridylyltransferase 1; AltName: Full=UDP-N-acetylgalactosamine diphosphorylase 1; EC=2.7.7.83;	-1.42051	0.00088923	0.0120792	down	NPS233-1_vs_NPS233-2
Glyma.03G120300	--	-1.41752	0.000106192	0.0021516	down	NPS233-1_vs_NPS233-2
Glyma.04G100100	RecName: Full=F-box protein FBW2; AltName: Full=SKP1-interacting partner 18;	-1.41421	2.74058e-05	0.000725213	down	NPS233-1_vs_NPS233-2
Glyma.16G073600	RecName: Full=2-methylene-furan-3-one reductase; EC=1.3.1.105 {ECO:0000250|UniProtKB:Q84V25}; AltName: Full=Enone oxidoreductase; AltName: Full=Quinone oxidoreductase; Short=FaQR;	-1.41223	0.00270069	0.0294286	down	NPS233-1_vs_NPS233-2
Glyma.14G176600	RecName: Full=Phospho-2-dehydro-3-deoxyheptonate aldolase 1, chloroplastic; EC=2.5.1.54; AltName: Full=3-deoxy-D-arabino-heptulosonate 7-phosphate synthase 1; AltName: Full=DAHP synthase 1; AltName: Full=Phospho-2-keto-3-deoxyheptonate aldolase 1; Flags: Precursor;	-1.40998	0.000138797	0.00270508	down	NPS233-1_vs_NPS233-2
Glyma.03G097600	RecName: Full=2-alkenal reductase (NADP(+)-dependent); EC=1.3.1.102 {ECO:0000269|PubMed:17945329, ECO:0000269|Ref.3, ECO:0000269|Ref.4}; AltName: Full=Alkenal double bound reductase; AltName: Full=Allylic alcohol dehydrogenase 1 {ECO:0000303|PubMed:11117876}; Short=allyl-ADH1 {ECO:0000303|PubMed:11117876}; AltName: Full=Flavin-free double bond reductase {ECO:0000303|Ref.4}; Short=NtDBR; AltName: …	-1.40038	0.000480163	0.00744023	down	NPS233-1_vs_NPS233-2
Glyma.18G142500	RecName: Full=Alpha-glucan water dikinase, chloroplastic; EC=2.7.9.4; AltName: Full=Starch-related protein R1; Flags: Precursor;	-1.39892	0.00148796	0.0183801	down	NPS233-1_vs_NPS233-2
Glyma.08G300700	RecName: Full=Probable methyltransferase PMT2; EC=2.1.1.-;	-1.39835	0.00101239	0.0134008	down	NPS233-1_vs_NPS233-2
Glyma.20G209000	RecName: Full=Probable methyltransferase PMT8; EC=2.1.1.-;	-1.39753	0.000753092	0.0106285	down	NPS233-1_vs_NPS233-2
Glyma.11G254900	RecName: Full=UDP-glucuronate 4-epimerase 6; EC=5.1.3.6; AltName: Full=UDP-glucuronic acid epimerase 6; Short=AtUGlcAE2;	-1.397	0.00012858	0.00253331	down	NPS233-1_vs_NPS233-2
Glyma.15G026400	RecName: Full=Linoleate 9S-lipoxygenase-4; EC=1.13.11.58; AltName: Full=Lipoxygenase-4; Short=L-4; AltName: Full=VSP94;	-1.39624	0.000853566	0.0116682	down	NPS233-1_vs_NPS233-2
Glyma.15G139200	RecName: Full=Transcription factor bHLH147; AltName: Full=ATBS1 interacting factor 3; AltName: Full=Basic helix-loop-helix protein 147; Short=AtbHLH147; Short=bHLH 147; AltName: Full=Transcription factor EN 142; AltName: Full=bHLH transcription factor bHLH147;	-1.39508	0.00120024	0.0154024	down	NPS233-1_vs_NPS233-2
Glyma.07G059800	RecName: Full=Glyoxylate/succinic semialdehyde reductase 1; Short=AtGLYR1; Short=AtGR1; Short=SSA reductase 1; EC=1.1.1.79 {ECO:0000269|Ref.7, ECO:0000269|Ref.8}; EC=1.1.1.n11 {ECO:0000269|Ref.7, ECO:0000269|Ref.8}; AltName: Full=Gamma-hydroxybutyrate dehydrogenase {ECO:0000303|PubMed:12882961}; Short=AtGHBDH;	-1.39488	0.00388019	0.0386006	down	NPS233-1_vs_NPS233-2
Glyma.16G165900	RecName: Full=Cellulose synthase A catalytic subunit 6 [UDP-forming]; Short=AtCesA6; EC=2.4.1.12; AltName: Full=AraxCelA; AltName: Full=Isoxaben-resistant protein 2; AltName: Full=Protein PROCUSTE 1; AltName: Full=Protein QUILL;	-1.39402	0.000406635	0.00653512	down	NPS233-1_vs_NPS233-2
Glyma.13G259200	RecName: Full=Interactor of constitutive active ROPs 4; AltName: Full=ROP-interactive partner 4;	-1.38903	0.000427135	0.00678289	down	NPS233-1_vs_NPS233-2
Glyma.14G072400	RecName: Full=50S ribosomal protein L31, chloroplastic; AltName: Full=CL31; AltName: Full=Protein EMBRYO DEFECTIVE 2184; Flags: Precursor;	-1.38735	0.000536673	0.00811744	down	NPS233-1_vs_NPS233-2
Glyma.17G047500	RecName: Full=Protein MARD1 {ECO:0000303|PubMed:15159630}; AltName: Full=Mediator of ABA-regulated dormancy1 {ECO:0000303|PubMed:15159630}; AltName: Full=Senescence-associated protein SAG102 {ECO:0000303|PubMed:11402199};	-1.38534	5.88877e-05	0.00135301	down	NPS233-1_vs_NPS233-2
Glyma.20G175300	RecName: Full=50S ribosomal protein L21, chloroplastic; AltName: Full=CL21; Flags: Precursor;	-1.38414	0.000318456	0.00538289	down	NPS233-1_vs_NPS233-2
Glyma.03G246300	RecName: Full=Probable ribose-5-phosphate isomerase 3, chloroplastic; EC=5.3.1.6; AltName: Full=Phosphoriboisomerase 3; AltName: Full=Protein EMBRYO DEFECTIVE 3119; Flags: Precursor;	-1.38221	0.00143757	0.0178703	down	NPS233-1_vs_NPS233-2
Glyma.13G200300	--	-1.38219	0.000787819	0.0109922	down	NPS233-1_vs_NPS233-2
Glyma.04G025000	RecName: Full=Endoglucanase 10; EC=3.2.1.4; AltName: Full=Endo-1,4-beta glucanase 10; Flags: Precursor;	-1.38213	0.000148135	0.00283311	down	NPS233-1_vs_NPS233-2
Glyma.11G151300	RecName: Full=50S ribosomal protein L27, chloroplastic {ECO:0000303|PubMed:10874046}; AltName: Full=CL27; AltName: Full=Chloroplastic large ribosomal subunit protein bL27c {ECO:0000303|PubMed:28007896}; Flags: Precursor;	-1.38019	0.0028041	0.0303293	down	NPS233-1_vs_NPS233-2
Glyma.18G026000	RecName: Full=Clathrin heavy chain 1;	-1.37579	0.000320269	0.00540163	down	NPS233-1_vs_NPS233-2
Glyma.03G171800	RecName: Full=Probable ADP-ribosylation factor GTPase-activating protein AGD6; Short=ARF GAP AGD6; AltName: Full=Protein ARF-GAP DOMAIN 6; Short=AtAGD6; AltName: Full=Protein ZIGA2;	-1.37554	0.00407755	0.0400407	down	NPS233-1_vs_NPS233-2
Glyma.06G009000	RecName: Full=Kinesin-like protein KIN-7D, mitochondrial {ECO:0000305}; AltName: Full=Mitochondria-targeted kinesin-related protein 2 {ECO:0000303|PubMed:11706156}; Flags: Precursor;	-1.37507	0.0019665	0.0229258	down	NPS233-1_vs_NPS233-2
Glyma.11G099300	RecName: Full=50S ribosomal protein L12-3, chloroplastic; AltName: Full=CL12-C; Flags: Precursor;	-1.37445	0.000829201	0.0114088	down	NPS233-1_vs_NPS233-2
Glyma.12G216900	RecName: Full=NAD(P)H dehydrogenase (quinone) FQR1 {ECO:0000305}; EC=1.6.5.2 {ECO:0000269|PubMed:11842161}; AltName: Full=Flavodoxin-like quinone reductase 1 {ECO:0000303|PubMed:11842161};	-1.36723	0.0024799	0.0274515	down	NPS233-1_vs_NPS233-2
Glyma.19G216300	RecName: Full=Calvin cycle protein CP12-2, chloroplastic; AltName: Full=CP12 domain-containing protein 2; AltName: Full=Chloroplast protein 12-2; Flags: Precursor;	-1.36434	0.00224306	0.0253415	down	NPS233-1_vs_NPS233-2
Glyma.13G207000	RecName: Full=Peroxiredoxin-2F, mitochondrial; EC=1.11.1.15; AltName: Full=Peroxiredoxin IIF; AltName: Full=Thioredoxin peroxidase 2F; Flags: Precursor;	-1.36306	0.000181652	0.00337034	down	NPS233-1_vs_NPS233-2
Glyma.08G298400	RecName: Full=Homeobox-leucine zipper protein ATHB-13; AltName: Full=HD-ZIP protein ATHB-13; AltName: Full=Homeodomain transcription factor ATHB-13;	-1.35582	0.00123836	0.0158452	down	NPS233-1_vs_NPS233-2
Glyma.05G245600	RecName: Full=Calcium-binding allergen Ole e 8; AltName: Full=PCA18/PCA23; AltName: Allergen=Ole e 8;	-1.35546	0.000398026	0.00643043	down	NPS233-1_vs_NPS233-2
Glyma.08G299900	RecName: Full=Delta(8)-fatty-acid desaturase 2; EC=1.14.19.29 {ECO:0000269|PubMed:22023480}; AltName: Full=Delta(8)-sphingolipid desaturase 2; AltName: Full=Sphingoid long-chain base desaturase 2; Short=Sphingoid LCB desaturase 2; AltName: Full=Sphingolipid 8-(E/Z)-desaturase 2;	-1.35517	0.00366544	0.0369387	down	NPS233-1_vs_NPS233-2
Glyma.01G168000	RecName: Full=V-type proton ATPase 16 kDa proteolipid subunit; Short=V-ATPase 16 kDa proteolipid subunit; AltName: Full=Vacuolar proton pump 16 kDa proteolipid subunit;	-1.35206	0.00095149	0.0127709	down	NPS233-1_vs_NPS233-2
Glyma.06G154800	RecName: Full=Probable methyltransferase PMT26; EC=2.1.1.-;	-1.35141	0.00177676	0.0211804	down	NPS233-1_vs_NPS233-2
Glyma.06G030900	RecName: Full=Isoflavone reductase-like protein; EC=1.3.1.-; AltName: Full=Pollen allergen Ole e 12.01; AltName: Allergen=Ole e 12.01;	-1.34781	0.001676	0.0201278	down	NPS233-1_vs_NPS233-2
Glyma.06G184800	RecName: Full=Nucleobase-ascorbate transporter 6; Short=AtNAT6;	-1.34536	0.000208989	0.00378697	down	NPS233-1_vs_NPS233-2
Glyma.01G115900	RecName: Full=Chlorophyll a-b binding protein CP29.2, chloroplastic; AltName: Full=LHCB4.2; AltName: Full=LHCII protein 4.2; Flags: Precursor;	-1.34115	0.00188902	0.0222313	down	NPS233-1_vs_NPS233-2
Glyma.03G063200	RecName: Full=30S ribosomal protein S31, chloroplastic; AltName: Full=Plastid-specific 30S ribosomal protein 4; Short=PSRP-4; Flags: Precursor;	-1.33904	0.000459016	0.00718142	down	NPS233-1_vs_NPS233-2
Glyma.20G243500	RecName: Full=Transketolase-2, chloroplastic; Short=TK; EC=2.2.1.1; Flags: Precursor;	-1.33852	0.000738325	0.0104682	down	NPS233-1_vs_NPS233-2
Glyma.18G045900	RecName: Full=Protein DJ-1 homolog D; Short=AtDJ1D; AltName: Full=Lactoylglutathione lyase DJ1D; EC=4.4.1.5;	-1.33826	2.1724e-05	0.000593801	down	NPS233-1_vs_NPS233-2
Glyma.13G005500	RecName: Full=36.4 kDa proline-rich protein;	-1.33601	0.000303962	0.00517782	down	NPS233-1_vs_NPS233-2
Glyma.02G061100	RecName: Full=Oxygen-evolving enhancer protein 1, chloroplastic; Short=OEE1; AltName: Full=33 kDa subunit of oxygen evolving system of photosystem II; AltName: Full=33 kDa thylakoid membrane protein; AltName: Full=OEC 33 kDa subunit; Flags: Precursor;	-1.33156	0.00352147	0.0358708	down	NPS233-1_vs_NPS233-2
Glyma.08G055000	RecName: Full=ABC transporter I family member 17; Short=ABC transporter ABCI.17; Short=AtABCI17; AltName: Full=MRP-related protein 1; AltName: Full=Non-intrinsic ABC protein 3;	-1.32079	0.00541529	0.0496647	down	NPS233-1_vs_NPS233-2
Glyma.17G119300	RecName: Full=GDP-fucose transporter 1 {ECO:0000303|PubMed:27381418}; AltName: Full=GDP-mannose transporter GONST4 {ECO:0000303|PubMed:15480787}; AltName: Full=Protein GOLGI NUCLEOTIDE SUGAR TRANSPORTER 4 {ECO:0000303|PubMed:15480787};	-1.31947	7.05802e-05	0.0015553	down	NPS233-1_vs_NPS233-2
Glyma.02G267500	RecName: Full=Zinc finger CCCH domain-containing protein 3; Short=AtC3H3; EC=3.1.-.-; AltName: Full=Zinc finger CCCH domain-containing protein ZFN-like 4;	-1.31507	0.00455415	0.0435599	down	NPS233-1_vs_NPS233-2
Glyma.04G002300	RecName: Full=50S ribosomal protein L3, chloroplastic {ECO:0000303|PubMed:10874046}; AltName: Full=Chloroplastic large ribosomal subunit protein uL3c {ECO:0000303|PubMed:28007896}; Flags: Precursor;	-1.30544	0.000907746	0.0122588	down	NPS233-1_vs_NPS233-2
Glyma.10G216700	RecName: Full=50S ribosomal protein L21, chloroplastic; AltName: Full=CL21; Flags: Precursor;	-1.30446	0.00104503	0.0137322	down	NPS233-1_vs_NPS233-2
Glyma.04G093500	RecName: Full=Transport inhibitor response 1-like protein; Short=TIR1-like protein;	-1.30382	0.00385409	0.0383859	down	NPS233-1_vs_NPS233-2
Glyma.15G194300	RecName: Full=Photosystem I reaction center subunit psaK, chloroplastic; AltName: Full=PSI-K; AltName: Full=Photosystem I subunit X; Flags: Precursor;	-1.30322	0.00453089	0.0433812	down	NPS233-1_vs_NPS233-2
Glyma.20G082800	RecName: Full=28 kDa ribonucleoprotein, chloroplastic; Short=28RNP;	-1.30284	0.000918339	0.0123692	down	NPS233-1_vs_NPS233-2
Glyma.07G198500	RecName: Full=30S ribosomal protein S5, chloroplastic; Flags: Precursor;	-1.3024	0.00209261	0.0241121	down	NPS233-1_vs_NPS233-2
Glyma.19G114500	RecName: Full=5-methyltetrahydropteroyltriglutamate--homocysteine methyltransferase 1; EC=2.1.1.14; AltName: Full=Cobalamin-independent methionine synthase 1; Short=AtMS1; AltName: Full=Vitamin-B12-independent methionine synthase 1;	-1.30115	4.10077e-06	0.000147917	down	NPS233-1_vs_NPS233-2
Glyma.01G242200	--	-1.29709	0.000596334	0.00884731	down	NPS233-1_vs_NPS233-2
Glyma.16G038300	RecName: Full=5-methyltetrahydropteroyltriglutamate--homocysteine methyltransferase 1; EC=2.1.1.14; AltName: Full=Cobalamin-independent methionine synthase 1; Short=AtMS1; AltName: Full=Vitamin-B12-independent methionine synthase 1;	-1.2962	4.14891e-05	0.00101317	down	NPS233-1_vs_NPS233-2
Glyma.01G126000	--	-1.29331	0.000663325	0.00960897	down	NPS233-1_vs_NPS233-2
Glyma.10G185000	RecName: Full=Protein WVD2-like 3 {ECO:0000305}; AltName: Full=Protein WAVE-DAMPENED 2-LIKE3 {ECO:0000303|PubMed:23653471};	-1.29222	0.000963369	0.0129012	down	NPS233-1_vs_NPS233-2
Glyma.04G256100	RecName: Full=Methylenetetrahydrofolate reductase 2; Short=AtMTHFR2; EC=1.5.1.20;	-1.2882	0.0003541	0.00586903	down	NPS233-1_vs_NPS233-2
Glyma.09G073600	RecName: Full=Sucrose synthase; EC=2.4.1.13; AltName: Full=Nodulin-100; Short=N-100; AltName: Full=Sucrose-UDP glucosyltransferase;	-1.28806	0.000769133	0.0108002	down	NPS233-1_vs_NPS233-2
Glyma.10G058000	RecName: Full=Adenosine kinase 2; Short=AK 2; EC=2.7.1.20; AltName: Full=Adenosine 5'-phosphotransferase 2;	-1.28591	0.000653303	0.00949497	down	NPS233-1_vs_NPS233-2
Glyma.04G017500	RecName: Full=Catalase-4; EC=1.11.1.6;	-1.28022	0.000286025	0.00491592	down	NPS233-1_vs_NPS233-2
Glyma.03G144500	RecName: Full=Omega-6 fatty acid desaturase, endoplasmic reticulum isozyme 2; EC=1.14.19.-;	-1.28013	0.000234968	0.00416431	down	NPS233-1_vs_NPS233-2
Glyma.07G022300	RecName: Full=Galactoside 2-alpha-L-fucosyltransferase; EC=2.4.1.-; AltName: Full=Xyloglucan alpha-(1,2)-fucosyltransferase; Short=AtFUT1;	-1.25859	0.00506984	0.0472877	down	NPS233-1_vs_NPS233-2
Glyma.06G077800	RecName: Full=UDP-galactose/UDP-glucose transporter 7 {ECO:0000303|PubMed:22933714}; Short=AtUTr7 {ECO:0000303|PubMed:22933714};	-1.25791	0.00368338	0.0370948	down	NPS233-1_vs_NPS233-2
Glyma.20G225000	RecName: Full=Auxin-responsive protein IAA16; AltName: Full=Indoleacetic acid-induced protein 16;	-1.25161	0.000440962	0.00695211	down	NPS233-1_vs_NPS233-2
Glyma.02G253600	RecName: Full=Probable sugar phosphate/phosphate translocator At3g11320;	-1.24829	0.000306154	0.00520649	down	NPS233-1_vs_NPS233-2
Glyma.14G093600	RecName: Full=Protein NDL1 {ECO:0000305}; AltName: Full=Protein N-MYC DOWNREGULATED-LIKE 1 {ECO:0000303|PubMed:19948787};	-1.24781	0.0032741	0.033896	down	NPS233-1_vs_NPS233-2
Glyma.07G013800	RecName: Full=Glucose-6-phosphate 1-dehydrogenase, chloroplastic; Short=G6PD; EC=1.1.1.49; Flags: Precursor;	-1.23877	0.00330841	0.0341705	down	NPS233-1_vs_NPS233-2
Glyma.17G012000	RecName: Full=Aminomethyltransferase, mitochondrial; EC=2.1.2.10; AltName: Full=Glycine cleavage system T protein; Short=GCVT; Flags: Precursor;	-1.23846	0.00211448	0.0242912	down	NPS233-1_vs_NPS233-2
Glyma.08G283700	RecName: Full=Alpha-glucan water dikinase, chloroplastic; EC=2.7.9.4; AltName: Full=Starch-related protein R1; Flags: Precursor;	-1.233	0.00463978	0.0441731	down	NPS233-1_vs_NPS233-2
Glyma.08G259200	RecName: Full=Chitinase-like protein 1; Short=AtCTL1; AltName: Full=Protein ANION ALTERED ROOT MORPHOLOGY; AltName: Full=Protein ECTOPIC DEPOSITION OF LIGNIN IN PITH 1; AltName: Full=Protein ECTOPIC ROOT HAIR 2; AltName: Full=Protein POM-POM1; AltName: Full=Protein SENSITIVE TO HOT TEMPERATURES 2; Flags: Precursor;	-1.23246	0.000134853	0.00263828	down	NPS233-1_vs_NPS233-2
Glyma.18G027200	RecName: Full=Phosphoinositide phospholipase C 6; EC=3.1.4.11; AltName: Full=Phosphoinositide phospholipase PLC6; Short=AtPLC6; Short=AtPLC8; Short=PI-PLC6;	-1.22481	0.00185339	0.021873	down	NPS233-1_vs_NPS233-2
Glyma.11G223700	RecName: Full=Mannose-1-phosphate guanylyltransferase 1; EC=2.7.7.13; AltName: Full=GDP-mannose pyrophosphorylase 1; AltName: Full=Protein CYTOKINESIS DEFECTIVE 1; AltName: Full=Protein EMBRYO DEFECTIVE 101; AltName: Full=Protein HYPERSENSITIVE TO AMMONIUM ION 1; AltName: Full=Protein SENSITIVE TO OZONE 1; AltName: Full=Protein VITAMIN C DEFECTIVE 1;	-1.22153	0.00411278	0.0402956	down	NPS233-1_vs_NPS233-2
Glyma.06G002000	RecName: Full=MLO-like protein 1; Short=AtMlo1; AltName: Full=MLO protein homolog 1; Short=AtMlo-H1;	-1.21839	0.00181874	0.021522	down	NPS233-1_vs_NPS233-2
Glyma.06G012000	RecName: Full=Protein RER1A; Short=AtRER1A;	-1.2174	0.00285426	0.0307203	down	NPS233-1_vs_NPS233-2
Glyma.13G240600	RecName: Full=Allantoinase; Short=AtALN; EC=3.5.2.5;	-1.2155	0.00231711	0.0259963	down	NPS233-1_vs_NPS233-2
Glyma.02G261100	RecName: Full=PRA1 family protein B1; Short=AtPRA1.B1; AltName: Full=Prenylated Rab acceptor 6;	-1.21408	0.00146619	0.0181477	down	NPS233-1_vs_NPS233-2
Glyma.12G223400	RecName: Full=Thioredoxin M4, chloroplastic; Short=AtTrxm4; Flags: Precursor;	-1.21345	0.00402112	0.0396251	down	NPS233-1_vs_NPS233-2
Glyma.17G132500	RecName: Full=Bifunctional dTDP-4-dehydrorhamnose 3,5-epimerase/dTDP-4-dehydrorhamnose reductase {ECO:0000305}; EC=1.1.1.133 {ECO:0000269|PubMed:15020741}; EC=5.1.3.13 {ECO:0000269|PubMed:15020741}; AltName: Full=dTDP-L-rhamnose synthase;	-1.20672	0.00126571	0.0161213	down	NPS233-1_vs_NPS233-2
Glyma.02G295900	RecName: Full=V-type proton ATPase subunit e2; Short=V-ATPase subunit e2; AltName: Full=Vacuolar H(+)-ATPase subunit e isoform 2; AltName: Full=Vacuolar proton pump subunit e2;	-1.19435	0.00297866	0.0316596	down	NPS233-1_vs_NPS233-2
Glyma.20G236400	RecName: Full=Protein RALF-like 1; AltName: Full=Rapid alkalinization factor 1; Short=AtRALF1; Flags: Precursor;	-1.18545	0.000539698	0.00814597	down	NPS233-1_vs_NPS233-2
Glyma.09G255500	RecName: Full=50S ribosomal protein L5, chloroplastic; Flags: Precursor;	-1.18244	0.00119862	0.0153919	down	NPS233-1_vs_NPS233-2
Glyma.15G261900	RecName: Full=Phosphoglycerate kinase, chloroplastic; EC=2.7.2.3; Flags: Precursor;	-1.18067	0.00178972	0.0212848	down	NPS233-1_vs_NPS233-2
Glyma.04G173100	RecName: Full=Protein IQ-DOMAIN 31;	-1.16982	0.00238441	0.0265959	down	NPS233-1_vs_NPS233-2
Glyma.02G138000	RecName: Full=Protein IQ-DOMAIN 14;	-1.16099	0.00302251	0.0320212	down	NPS233-1_vs_NPS233-2
Glyma.18G300600	RecName: Full=Ras-related protein RABA5d; Short=AtRABA5d;	-1.14979	0.0015061	0.018537	down	NPS233-1_vs_NPS233-2
Glyma.02G018000	RecName: Full=UDP-glucuronic acid decarboxylase 2; EC=4.1.1.35; AltName: Full=UDP-XYL synthase 2; AltName: Full=UDP-glucuronate decarboxylase 2; Short=UGD; Short=UXS-2; AltName: Full=dTDP-glucose 4-6-dehydratase homolog D18;	-1.14316	0.00134942	0.0169553	down	NPS233-1_vs_NPS233-2
Glyma.08G209300	--	-1.12998	0.00446538	0.0429468	down	NPS233-1_vs_NPS233-2
Glyma.12G064600	RecName: Full=UDP-glucuronic acid decarboxylase 6; EC=4.1.1.35; AltName: Full=UDP-XYL synthase 6; AltName: Full=UDP-glucuronate decarboxylase 6; Short=UGD; Short=UXS-6;	-1.12253	0.000594263	0.00882084	down	NPS233-1_vs_NPS233-2
Glyma.09G098800	--	-1.1163	0.00541461	0.0496647	down	NPS233-1_vs_NPS233-2
Glyma.14G184500	RecName: Full=Serine hydroxymethyltransferase 2, mitochondrial; Short=AtSHMT2; EC=2.1.2.1; AltName: Full=Glycine hydroxymethyltransferase 2; AltName: Full=Serine methylase 2; Flags: Precursor;	-1.11583	0.000968276	0.0129508	down	NPS233-1_vs_NPS233-2
Glyma.13G272000	RecName: Full=Sodium/calcium exchanger NCL {ECO:0000305}; AltName: Full=Na(+)/Ca(2+)-exchange protein NCL {ECO:0000305}; AltName: Full=Protein NCX-like {ECO:0000303|PubMed:23148213}; Short=AtNCL {ECO:0000303|PubMed:23148213};	-1.11524	0.00477767	0.0451803	down	NPS233-1_vs_NPS233-2
Glyma.10G002600	RecName: Full=50S ribosomal protein L28, chloroplastic; AltName: Full=CL28; Flags: Precursor;	-1.10777	0.000730553	0.0103964	down	NPS233-1_vs_NPS233-2
Glyma.05G045900	RecName: Full=Malate synthase, glyoxysomal; Short=MS; EC=2.3.3.9; Flags: Fragment;	-1.10115	0.000114968	0.00230205	down	NPS233-1_vs_NPS233-2
Glyma.18G151900	RecName: Full=Uncharacterized protein At5g01610;	-1.09522	0.00159263	0.0194152	down	NPS233-1_vs_NPS233-2
Glyma.18G237400	RecName: Full=50S ribosomal protein L5, chloroplastic; Flags: Precursor;	-1.09125	0.00329986	0.0341199	down	NPS233-1_vs_NPS233-2
Glyma.12G084100	RecName: Full=UDP-D-apiose/UDP-D-xylose synthase 2;	-1.08879	0.00112002	0.0145494	down	NPS233-1_vs_NPS233-2
Glyma.12G031800	RecName: Full=Subtilisin-like protease SBT1.6 {ECO:0000303|PubMed:16193095}; EC=3.4.21.- {ECO:0000305}; AltName: Full=Subtilase subfamily 1 member 6 {ECO:0000303|PubMed:16193095}; Short=AtSBT1.6 {ECO:0000303|PubMed:16193095}; AltName: Full=Subtilisin-like serine protease 2 {ECO:0000303|PubMed:12702015}; Short=At-SLP2 {ECO:0000303|PubMed:12702015}; Flags: Precursor;	-1.08675	0.0039988	0.0394559	down	NPS233-1_vs_NPS233-2
Glyma.12G081300	RecName: Full=Superoxide dismutase [Cu-Zn], chloroplastic; EC=1.15.1.1; Flags: Precursor;	-1.07732	0.00180185	0.0213757	down	NPS233-1_vs_NPS233-2
Glyma.14G207600	RecName: Full=CBS domain-containing protein CBSX3, mitochondrial; Flags: Precursor;	-1.07644	0.0019167	0.0224819	down	NPS233-1_vs_NPS233-2
Glyma.13G162800	RecName: Full=Pyrophosphate-energized vacuolar membrane proton pump; EC=3.6.1.1; AltName: Full=Pyrophosphate-energized inorganic pyrophosphatase; Short=H(+)-PPase; AltName: Full=Vacuolar H(+)-pyrophosphatase;	-1.06584	0.000686997	0.00989586	down	NPS233-1_vs_NPS233-2
Glyma.18G287600	RecName: Full=Ras-related protein RABE1c; Short=AtRABE1c; AltName: Full=Ras-related protein Ara-3; AltName: Full=Ras-related protein Rab8A; Short=AtRab8A;	-1.06352	0.00422813	0.0410977	down	NPS233-1_vs_NPS233-2
Glyma.14G031800	RecName: Full=Oxygen-evolving enhancer protein 2-2, chloroplastic; Short=OEE2; AltName: Full=23 kDa subunit of oxygen evolving system of photosystem II; AltName: Full=23 kDa thylakoid membrane protein; AltName: Full=OEC 23 kDa subunit; Flags: Precursor;	-1.0621	0.00544984	0.0498327	down	NPS233-1_vs_NPS233-2
Glyma.08G173700	RecName: Full=Photosystem II 10 kDa polypeptide, chloroplastic; Short=PII10; Flags: Precursor;	-1.05501	0.00320714	0.033349	down	NPS233-1_vs_NPS233-2
Glyma.05G156900	--	-1.05473	0.00461527	0.0439956	down	NPS233-1_vs_NPS233-2
Glyma.06G097600	--	-1.05342	0.00488937	0.0459857	down	NPS233-1_vs_NPS233-2
Glyma.17G109400	RecName: Full=Bifunctional purple acid phosphatase 26; Includes: RecName: Full=Acid phosphatase; EC=3.1.3.2; Includes: RecName: Full=Peroxidase; EC=1.11.1.7; Flags: Precursor;	-1.04124	0.00289904	0.0310499	down	NPS233-1_vs_NPS233-2
Glyma.15G056800	RecName: Full=Peptidyl-prolyl cis-trans isomerase FKBP12; Short=PPIase FKBP12; EC=5.2.1.8; AltName: Full=12 kDa FK506-binding protein; Short=12 kDa FKBP; AltName: Full=FK506-binding protein 12; Short=VfFKBP12; AltName: Full=FKBP-12; AltName: Full=Immunophilin FKBP12; AltName: Full=Rotamase;	-1.03879	0.000231522	0.0041193	down	NPS233-1_vs_NPS233-2
Glyma.15G145000	--	-1.03222	0.00150443	0.0185238	down	NPS233-1_vs_NPS233-2
Glyma.12G046000	RecName: Full=4-hydroxy-3-methylbut-2-enyl diphosphate reductase, chloroplastic; EC=1.17.7.4; AltName: Full=Protein CHLOROPLAST BIOGENESIS 6; Flags: Precursor;	-1.02809	0.00322264	0.0334753	down	NPS233-1_vs_NPS233-2
Glyma.03G219400	RecName: Full=Calvin cycle protein CP12-2, chloroplastic; AltName: Full=CP12 domain-containing protein 2; AltName: Full=Chloroplast protein 12-2; Flags: Precursor;	-1.01307	0.00420786	0.0409267	down	NPS233-1_vs_NPS233-2
Glyma.13G270300	RecName: Full=Protein LIGHT-DEPENDENT SHORT HYPOCOTYLS 10; AltName: Full=Protein ORGAN BOUNDARY 10;	-1.01003	0.0026003	0.0284864	down	NPS233-1_vs_NPS233-2
Glyma.16G077800	RecName: Full=NADP-dependent malic enzyme; Short=NADP-ME; EC=1.1.1.40;	-1.00256	0.00287316	0.0308372	down	NPS233-1_vs_NPS233-2
Glyma.09G164200	RecName: Full=DNA-directed RNA polymerases II, IV and V subunit 12; AltName: Full=DNA-directed RNA Polymerase II subunit K;	1.05737	0.00477026	0.0451381	up	NPS233-1_vs_NPS233-2
Glyma.20G110900	--	1.10246	0.000648422	0.00943763	up	NPS233-1_vs_NPS233-2
Glyma.10G195900	RecName: Full=Nudix hydrolase 26, chloroplastic; Short=AtNUDT26; EC=3.6.1.-; AltName: Full=Bis(5'-nucleosyl)-tetraphosphatase (asymmetrical); Flags: Precursor;	1.10474	0.00293953	0.0313593	up	NPS233-1_vs_NPS233-2
Glyma.17G013600	RecName: Full=Peroxidase 42; Short=Atperox P42; EC=1.11.1.7; AltName: Full=ATP1a/ATP1b; AltName: Full=PRXR1; Flags: Precursor;	1.11405	0.000899068	0.0121845	up	NPS233-1_vs_NPS233-2
Glyma.05G103200	RecName: Full=Subtilisin-like protease SBT1.7 {ECO:0000303|PubMed:16193095}; EC=3.4.21.- {ECO:0000305}; AltName: Full=Cucumisin-like serine protease; AltName: Full=Subtilase subfamily 1 member 7 {ECO:0000303|PubMed:16193095}; Short=AtSBT1.7 {ECO:0000303|PubMed:16193095}; AltName: Full=Subtilisin-like serine protease 1 {ECO:0000303|PubMed:12702015}; Short=At-SLP1 {ECO:0000303|PubMed:12702015}; Fla…	1.13273	0.00473484	0.044886	up	NPS233-1_vs_NPS233-2
Glyma.20G135200	--	1.14096	4.59192e-05	0.00109948	up	NPS233-1_vs_NPS233-2
Glyma.09G192800	RecName: Full=Peroxiredoxin-2B; EC=1.11.1.15; AltName: Full=Peroxiredoxin IIB; AltName: Full=Peroxiredoxin TPx1; AltName: Full=Thioredoxin peroxidase 2B; AltName: Full=Thioredoxin-dependent peroxidase 1;	1.14162	0.00276131	0.0299827	up	NPS233-1_vs_NPS233-2
Glyma.12G048500	RecName: Full=B3 domain-containing protein REM21; AltName: Full=Protein REPRODUCTIVE MERISTEM 21;	1.14472	0.0034105	0.0349545	up	NPS233-1_vs_NPS233-2
Glyma.01G124300	RecName: Full=40S ribosomal protein S4;	1.14858	0.00249465	0.0275849	up	NPS233-1_vs_NPS233-2
Glyma.07G090800	--	1.16098	0.00294592	0.0313593	up	NPS233-1_vs_NPS233-2
Glyma.05G199800	RecName: Full=Transaldolase {ECO:0000250|UniProtKB:P48983}; EC=2.2.1.2; Flags: Fragments;	1.16763	0.00109792	0.014322	up	NPS233-1_vs_NPS233-2
Glyma.09G050700	--	1.17158	0.00229409	0.0257852	up	NPS233-1_vs_NPS233-2
Glyma.03G162900	RecName: Full=Actin-depolymerizing factor; Short=ADF;	1.1833	0.00186872	0.0220285	up	NPS233-1_vs_NPS233-2
Glyma.18G051100	RecName: Full=Probable inactive receptor kinase At5g58300; Flags: Precursor;	1.19311	0.00510255	0.0475044	up	NPS233-1_vs_NPS233-2
Glyma.13G235000	RecName: Full=Receptor-like protein kinase HSL1; EC=2.7.11.1; AltName: Full=Protein HAESA-LIKE1; Flags: Precursor;	1.19813	0.00533108	0.049083	up	NPS233-1_vs_NPS233-2
Glyma.04G076300	RecName: Full=Probable sarcosine oxidase; EC=1.5.3.1;	1.21094	0.00270658	0.0294719	up	NPS233-1_vs_NPS233-2
Glyma.05G000700	RecName: Full=Pyruvate kinase, cytosolic isozyme; Short=PK; EC=2.7.1.40;	1.21974	0.0033991	0.0348726	up	NPS233-1_vs_NPS233-2
Glyma.18G092700	--	1.24115	0.00193518	0.022664	up	NPS233-1_vs_NPS233-2
Glyma.08G032700	RecName: Full=Glucan endo-1,3-beta-glucosidase 13; EC=3.2.1.39; AltName: Full=(1->3)-beta-glucan endohydrolase 13; Short=(1->3)-beta-glucanase 13; AltName: Full=Beta-1,3-endoglucanase 13; Short=Beta-1,3-glucanase 13; Flags: Precursor;	1.25439	0.00500332	0.0468095	up	NPS233-1_vs_NPS233-2
Glyma.03G234300	--	1.25552	0.00240291	0.0267342	up	NPS233-1_vs_NPS233-2
Glyma.07G199900	RecName: Full=Polyubiquitin 10; Contains: RecName: Full=Ubiquitin; Flags: Precursor;	1.25844	0.00381015	0.0381271	up	NPS233-1_vs_NPS233-2
Glyma.12G037000	RecName: Full=Polyol transporter 5; AltName: Full=Protein POLYOL TRANSPORTER 5; Short=AtPLT5; AltName: Full=Sugar-proton symporter PLT5;	1.25872	0.000431966	0.00684544	up	NPS233-1_vs_NPS233-2
Glyma.13G352400	RecName: Full=IAA-amino acid hydrolase ILR1-like 4 {ECO:0000303|PubMed:10072397}; EC=3.5.1.- {ECO:0000305}; AltName: Full=jasmonoyl-L-amino acid hydrolase {ECO:0000305}; EC=3.5.1.127 {ECO:0000269|PubMed:24052260}; Flags: Precursor;	1.26122	0.00196445	0.0229194	up	NPS233-1_vs_NPS233-2
Glyma.19G172500	RecName: Full=Histone H4;	1.27468	0.000257722	0.00450257	up	NPS233-1_vs_NPS233-2
Glyma.13G362300	RecName: Full=ADP,ATP carrier protein 1, chloroplastic; AltName: Full=ADP/ATP translocase 1; AltName: Full=Adenine nucleotide translocase 1; Flags: Precursor;	1.27529	0.00127564	0.0162275	up	NPS233-1_vs_NPS233-2
Glyma.01G067600	RecName: Full=Sugar transport protein 1; AltName: Full=Glucose transporter; AltName: Full=Hexose transporter 1;	1.27932	0.00419966	0.0408988	up	NPS233-1_vs_NPS233-2
Glyma.14G023100	--	1.29493	0.00204989	0.0236911	up	NPS233-1_vs_NPS233-2
Glyma.20G224700	RecName: Full=Transcription factor UNE12; AltName: Full=Basic helix-loop-helix protein 59; Short=AtbHLH59; Short=bHLH 59; AltName: Full=Protein UNFERTILIZED EMBRYO SAC 12; AltName: Full=Transcription factor EN 93; AltName: Full=bHLH transcription factor bHLH059;	1.30367	0.00386136	0.0384457	up	NPS233-1_vs_NPS233-2
Glyma.01G119500	RecName: Full=AMP deaminase {ECO:0000303|PubMed:15918887}; Short=AtAMPD {ECO:0000303|PubMed:15918887}; EC=3.5.4.6 {ECO:0000305}; AltName: Full=Protein EMBRYONIC FACTOR 1 {ECO:0000303|PubMed:15918887};	1.3042	0.00212259	0.0243388	up	NPS233-1_vs_NPS233-2
Glyma.17G153500	--	1.30871	0.00433842	0.0419176	up	NPS233-1_vs_NPS233-2
Glyma.15G156700	--	1.31817	0.00529743	0.0488611	up	NPS233-1_vs_NPS233-2
Glyma.08G241300	RecName: Full=Probable mitochondrial saccharopine dehydrogenase-like oxidoreductase At5g39410; Short=SDH; EC=1.-.-.-;	1.31903	0.0021622	0.0246549	up	NPS233-1_vs_NPS233-2
Glyma.18G092900	RecName: Full=GDP-L-galactose phosphorylase 1; EC=2.7.7.69; AltName: Full=Protein VITAMIN C DEFECTIVE 2;	1.32179	0.000178382	0.00332865	up	NPS233-1_vs_NPS233-2
Glyma.11G199400	RecName: Full=Ubiquitin-conjugating enzyme E2-17 kDa; EC=2.3.2.23; AltName: Full=E2 ubiquitin-conjugating enzyme; AltName: Full=Ubiquitin carrier protein; AltName: Full=Ubiquitin-protein ligase;	1.32461	0.00338721	0.0348087	up	NPS233-1_vs_NPS233-2
Glyma.01G167700	--	1.32839	0.000809581	0.0112244	up	NPS233-1_vs_NPS233-2
Glyma.18G182800	--	1.33034	0.00308599	0.0325077	up	NPS233-1_vs_NPS233-2
Glyma.13G222800	RecName: Full=Subtilisin-like protease SBT5.6 {ECO:0000303|PubMed:16193095}; EC=3.4.21.- {ECO:0000255|PROSITE-ProRule:PRU10082}; AltName: Full=Subtilase subfamily 5 member 6 {ECO:0000303|PubMed:16193095}; Short=AtSBT5.6 {ECO:0000303|PubMed:16193095}; Flags: Precursor;	1.33195	0.00294632	0.0313593	up	NPS233-1_vs_NPS233-2
Glyma.19G182400	RecName: Full=Adenosine kinase 2; Short=AK 2; EC=2.7.1.20; AltName: Full=Adenosine 5'-phosphotransferase 2;	1.33533	0.0045847	0.0437599	up	NPS233-1_vs_NPS233-2
Glyma.08G310100	RecName: Full=Agamous-like MADS-box protein AGL1; AltName: Full=Protein SHATTERPROOF 1;	1.33926	0.00152953	0.0187877	up	NPS233-1_vs_NPS233-2
Glyma.19G110900	RecName: Full=Putative H/ACA ribonucleoprotein complex subunit 1-like protein 1;	1.3481	0.000525792	0.00797853	up	NPS233-1_vs_NPS233-2
novel.907	--	1.35572	0.000337136	0.00562431	up	NPS233-1_vs_NPS233-2
Glyma.18G105800	RecName: Full=Agamous-like MADS-box protein AGL1; AltName: Full=Protein SHATTERPROOF 1;	1.357	7.64613e-05	0.00165752	up	NPS233-1_vs_NPS233-2
Glyma.13G244500	--	1.35706	0.00317179	0.0331612	up	NPS233-1_vs_NPS233-2
Glyma.07G155200	RecName: Full=Ferritin, chloroplastic; EC=1.16.3.1; AltName: Full=Apf1; Flags: Precursor;	1.36066	0.00148796	0.0183801	up	NPS233-1_vs_NPS233-2
Glyma.05G246700	RecName: Full=ERAD-associated E3 ubiquitin-protein ligase component HRD3A {ECO:0000305}; AltName: Full=AtSel1A {ECO:0000303|PubMed:21187394}; AltName: Full=Protein EMS-MUTAGENIZED BRI1 SUPPRESSOR 5 {ECO:0000303|PubMed:21187394}; Flags: Precursor;	1.36719	0.00224047	0.0253309	up	NPS233-1_vs_NPS233-2
Glyma.09G191800	RecName: Full=Probable protein ABIL5; AltName: Full=Abl interactor-like protein 5;	1.37257	0.00290832	0.0311275	up	NPS233-1_vs_NPS233-2
Glyma.10G206600	RecName: Full=Protein indeterminate-domain 4, chloroplastic {ECO:0000303|PubMed:16784536}; Flags: Precursor;	1.3744	0.000255875	0.00447541	up	NPS233-1_vs_NPS233-2
Glyma.09G126300	RecName: Full=Plastidial pyruvate kinase 2; Short=PKp2; EC=2.7.1.40; AltName: Full=Plastidial pyruvate kinase 1; Short=PKP1; AltName: Full=Pyruvate kinase III; AltName: Full=Pyruvate kinase isozyme B1, chloroplastic; Short=PKP-BETA1; Short=Plastidic pyruvate kinase beta subunit 1; Flags: Precursor;	1.38215	0.00523603	0.0484404	up	NPS233-1_vs_NPS233-2
Glyma.10G106400	RecName: Full=Probable calcium-binding protein CML49; AltName: Full=Calmodulin-like protein 49;	1.38539	0.00216795	0.0247113	up	NPS233-1_vs_NPS233-2
Glyma.04G151600	RecName: Full=Palmitoyl-acyl carrier protein thioesterase, chloroplastic; EC=3.1.2.-; AltName: Full=16:0-acyl-carrier protein thioesterase; Short=16:0-ACP thioesterase; AltName: Full=Acyl-[acyl-carrier-protein] hydrolase; AltName: Full=Acyl-acyl carrier protein thioesterase B1 {ECO:0000303|PubMed:10859193}; Short=AtFATB1 {ECO:0000303|PubMed:10859193}; Flags: Precursor;	1.38664	0.00183727	0.0216994	up	NPS233-1_vs_NPS233-2
Glyma.20G170200	RecName: Full=Carboxypeptidase SOL1; EC=3.4.17.-; AltName: Full=Protein SUPPRESSOR OF LLP1 1 {ECO:0000303|PubMed:12932329}; Flags: Precursor;	1.39223	0.00543385	0.0497787	up	NPS233-1_vs_NPS233-2
Glyma.18G204200	RecName: Full=Pyruvate decarboxylase 1; Short=AtPDC1; EC=4.1.1.1;	1.39576	0.000742872	0.0105084	up	NPS233-1_vs_NPS233-2
Glyma.20G093900	--	1.3964	0.00220797	0.0250558	up	NPS233-1_vs_NPS233-2
Glyma.20G018800	RecName: Full=Cytochrome P450 89A2; EC=1.14.-.-; AltName: Full=ATH 6-1; AltName: Full=CYPLXXXIX;	1.40361	0.00250189	0.0276351	up	NPS233-1_vs_NPS233-2
Glyma.08G021000	--	1.41332	0.00410876	0.040269	up	NPS233-1_vs_NPS233-2
Glyma.02G269000	RecName: Full=Glucan endo-1,3-beta-glucosidase 3; EC=3.2.1.39; AltName: Full=(1->3)-beta-glucan endohydrolase 3; Short=(1->3)-beta-glucanase 3; AltName: Full=Beta-1,3-endoglucanase 3; Short=Beta-1,3-glucanase 3; Flags: Precursor;	1.42026	0.00202576	0.0234465	up	NPS233-1_vs_NPS233-2
Glyma.07G227700	RecName: Full=Probable protein S-acyltransferase 22; EC=2.3.1.225; AltName: Full=Probable palmitoyltransferase At1g69420; AltName: Full=Zinc finger DHHC domain-containing protein At1g69420;	1.42779	0.00404384	0.0397852	up	NPS233-1_vs_NPS233-2
Glyma.11G155900	RecName: Full=Nudix hydrolase 16, mitochondrial; Short=AtNUDT16; EC=3.6.1.-; Flags: Precursor;	1.4337	0.00293877	0.0313593	up	NPS233-1_vs_NPS233-2
Glyma.08G224800	--	1.43561	0.00473405	0.044886	up	NPS233-1_vs_NPS233-2
Glyma.12G241800	RecName: Full=Peroxidase 17; Short=Atperox P17; EC=1.11.1.7; AltName: Full=ATP25a; Flags: Precursor;	1.43582	0.00018427	0.00341154	up	NPS233-1_vs_NPS233-2
Glyma.09G004400	RecName: Full=5'-adenylylsulfate reductase 3, chloroplastic; EC=1.8.4.9; AltName: Full=3'-phosphoadenosine-5'-phosphosulfate reductase homolog 26; Short=PAPS reductase homolog 26; Short=Prh-26; AltName: Full=Adenosine 5'-phosphosulfate 5'-adenylylsulfate sulfotransferase 3; Short=APS sulfotransferase 3; AltName: Full=Thioredoxin-independent APS reductase 3; Flags: Precursor;	1.43825	0.000422217	0.0067187	up	NPS233-1_vs_NPS233-2
Glyma.12G015700	RecName: Full=Putative gamma-glutamylcyclotransferase At3g02910; EC=2.3.2.-;	1.4398	0.00291115	0.031147	up	NPS233-1_vs_NPS233-2
Glyma.08G232600	--	1.44552	0.000868463	0.0118455	up	NPS233-1_vs_NPS233-2
Glyma.04G086900	RecName: Full=ATP-dependent 6-phosphofructokinase 3 {ECO:0000255|HAMAP-Rule:MF_03186}; Short=ATP-PFK 3 {ECO:0000255|HAMAP-Rule:MF_03186}; Short=Phosphofructokinase 3 {ECO:0000255|HAMAP-Rule:MF_03186}; EC=2.7.1.11 {ECO:0000255|HAMAP-Rule:MF_03186}; AltName: Full=Phosphohexokinase 3 {ECO:0000255|HAMAP-Rule:MF_03186};	1.4484	0.00473068	0.0448742	up	NPS233-1_vs_NPS233-2
Glyma.07G024100	RecName: Full=Factor of DNA methylation 1 {ECO:0000303|PubMed:22302148}; AltName: Full=Protein IDN2 PARALOG 1 {ECO:0000303|PubMed:22570638}; AltName: Full=Protein IDN2-LIKE 1 {ECO:0000303|PubMed:22592791};	1.44921	0.00280083	0.0303154	up	NPS233-1_vs_NPS233-2
Glyma.06G266500	RecName: Full=Kinesin-like protein KIN-14N {ECO:0000305}; AltName: Full=AtKIN14d {ECO:0000303|PubMed:18088313}; AltName: Full=Kinesin-like protein KatC {ECO:0000303|PubMed:8075402, ECO:0000303|PubMed:8492804};	1.44978	0.00202028	0.0234194	up	NPS233-1_vs_NPS233-2
Glyma.10G060200	--	1.45348	0.00428626	0.0415443	up	NPS233-1_vs_NPS233-2
Glyma.11G106600	RecName: Full=Actin-depolymerizing factor 5; Short=ADF-5; Short=AtADF5;	1.45645	0.000110548	0.0022281	up	NPS233-1_vs_NPS233-2
Glyma.20G017400	RecName: Full=Protein ESMERALDA 1 {ECO:0000303|PubMed:27317803, ECO:0000312|EMBL:ARJ31418.1}; EC=2.4.1.- {ECO:0000305}; AltName: Full=O-fucosyltransferase 17 {ECO:0000305}; Short=O-FucT-17 {ECO:0000305}; AltName: Full=O-fucosyltransferase family protein {ECO:0000305};	1.45824	0.00361838	0.0365722	up	NPS233-1_vs_NPS233-2
Glyma.10G166000	RecName: Full=Probable low-specificity L-threonine aldolase 1; EC=4.1.2.48; AltName: Full=Threonine aldolase 1;	1.45908	0.00414132	0.0404976	up	NPS233-1_vs_NPS233-2
Glyma.20G210300	RecName: Full=Magnesium transporter MRS2-2; AltName: Full=Magnesium Transporter 9; Short=AtMGT9;	1.45912	0.00185692	0.0219062	up	NPS233-1_vs_NPS233-2
Glyma.08G010000	RecName: Full=Bidirectional sugar transporter SWEET10 {ECO:0000303|PubMed:21107422}; Short=AtSWEET10 {ECO:0000303|PubMed:21107422}; AltName: Full=Protein SUGARS WILL EVENTUALLY BE EXPORTED TRANSPORTERS 10 {ECO:0000303|PubMed:21107422};	1.46292	0.00379705	0.0380399	up	NPS233-1_vs_NPS233-2
Glyma.19G193500	RecName: Full=GDSL esterase/lipase At5g03610; EC=3.1.1.-; AltName: Full=Extracellular lipase At5g03610; Flags: Precursor;	1.46649	0.00316373	0.0330882	up	NPS233-1_vs_NPS233-2
Glyma.01G192600	RecName: Full=LOB domain-containing protein 38; AltName: Full=ASYMMETRIC LEAVES 2-like protein 40; Short=AS2-like protein 40;	1.46889	1.2146e-05	0.000366469	up	NPS233-1_vs_NPS233-2
Glyma.19G032900	RecName: Full=PI-PLC X domain-containing protein At5g67130; Flags: Precursor;	1.47695	0.00311855	0.0327272	up	NPS233-1_vs_NPS233-2
Glyma.20G202600	RecName: Full=Uncharacterized protein At4g14450, chloroplastic; Flags: Precursor;	1.48908	0.00251855	0.0277992	up	NPS233-1_vs_NPS233-2
Glyma.17G225200	RecName: Full=PHD finger protein ALFIN-LIKE 3; Short=Protein AL3;	1.49461	0.00479445	0.0452971	up	NPS233-1_vs_NPS233-2
Glyma.05G182600	RecName: Full=Alanine--glyoxylate aminotransferase 2 homolog 1, mitochondrial; EC=2.6.1.44; AltName: Full=Beta-alanine-pyruvate aminotransferase 1; Flags: Precursor;	1.49672	1.89274e-05	0.000528178	up	NPS233-1_vs_NPS233-2
Glyma.06G161200	RecName: Full=Calcium-dependent protein kinase SK5; Short=CDPK; EC=2.7.11.1;	1.49827	0.000518	0.00789499	up	NPS233-1_vs_NPS233-2
Glyma.06G088600	RecName: Full=ATP-dependent 6-phosphofructokinase 3 {ECO:0000255|HAMAP-Rule:MF_03186}; Short=ATP-PFK 3 {ECO:0000255|HAMAP-Rule:MF_03186}; Short=Phosphofructokinase 3 {ECO:0000255|HAMAP-Rule:MF_03186}; EC=2.7.1.11 {ECO:0000255|HAMAP-Rule:MF_03186}; AltName: Full=Phosphohexokinase 3 {ECO:0000255|HAMAP-Rule:MF_03186};	1.50237	0.000232067	0.0041248	up	NPS233-1_vs_NPS233-2
Glyma.05G050100	RecName: Full=Protein HOTHEAD; AltName: Full=Protein ADHESION OF CALYX EDGES; Flags: Precursor;	1.50711	0.000604797	0.00893207	up	NPS233-1_vs_NPS233-2
Glyma.11G252300	RecName: Full=MADS-box transcription factor 1;	1.50799	0.00174158	0.0208014	up	NPS233-1_vs_NPS233-2
Glyma.16G130700	RecName: Full=Probable serine protease EDA2; EC=3.4.-.-; AltName: Full=Protein EMBRYO SAC DEVELOPMENT ARREST 2; Flags: Precursor;	1.51659	1.60485e-05	0.000463865	up	NPS233-1_vs_NPS233-2
Glyma.09G153900	RecName: Full=Enolase; EC=4.2.1.11; AltName: Full=2-phospho-D-glycerate hydro-lyase; AltName: Full=2-phosphoglycerate dehydratase; AltName: Full=OSE1;	1.52155	0.00508916	0.0474391	up	NPS233-1_vs_NPS233-2
Glyma.08G307800	RecName: Full=3-hydroxyisobutyryl-CoA hydrolase-like protein 5; EC=3.1.2.-;	1.52815	0.00128265	0.0162898	up	NPS233-1_vs_NPS233-2
Glyma.13G132400	RecName: Full=Soluble inorganic pyrophosphatase 4 {ECO:0000303|PubMed:15135060}; EC=3.6.1.1 {ECO:0000269|Ref.6}; AltName: Full=Pyrophosphate phospho-hydrolase 4 {ECO:0000303|PubMed:15135060}; Short=PPase 4 {ECO:0000303|PubMed:15135060};	1.52986	0.000450803	0.00708543	up	NPS233-1_vs_NPS233-2
Glyma.09G211000	RecName: Full=CSC1-like protein At1g32090;	1.53418	0.000362275	0.00597054	up	NPS233-1_vs_NPS233-2
Glyma.03G180200	RecName: Full=Probable E3 ubiquitin ligase SUD1; EC=2.3.2.27; AltName: Full=Protein ECERIFERUM 9; AltName: Full=Protein SUPPRESSOR OF DRY2 DEFFECTS 1; Short=AtSUD1; AltName: Full=RING-type E3 ubiquitin transferase SUD1 {ECO:0000305}; AltName: Full=RING/U-box domain-containing protein;	1.53869	0.00117442	0.015128	up	NPS233-1_vs_NPS233-2
Glyma.19G178100	RecName: Full=60S ribosomal protein L4-1; Short=L1;	1.54008	0.00105682	0.0138693	up	NPS233-1_vs_NPS233-2
Glyma.20G212500	RecName: Full=Uncharacterized protein At2g17340;	1.54066	0.000204838	0.00371925	up	NPS233-1_vs_NPS233-2
Glyma.17G103900	RecName: Full=Protein DAMAGED DNA-BINDING 2; AltName: Full=UV-damaged DNA-binding protein 2;	1.54201	0.000414072	0.00663727	up	NPS233-1_vs_NPS233-2
Glyma.12G031700	RecName: Full=Actin-depolymerizing factor 5; Short=ADF-5; Short=AtADF5;	1.54202	0.000573839	0.00857991	up	NPS233-1_vs_NPS233-2
Glyma.09G024900	RecName: Full=Probable LRR receptor-like serine/threonine-protein kinase At4g20940; EC=2.7.11.1;	1.54603	0.00321205	0.0333888	up	NPS233-1_vs_NPS233-2
Glyma.19G225300	--	1.54665	0.00302416	0.0320213	up	NPS233-1_vs_NPS233-2
Glyma.09G018600	RecName: Full=Ferric reduction oxidase 6; Short=AtFRO6; EC=1.16.1.7; AltName: Full=Ferric-chelate reductase 6;	1.55511	0.00146159	0.0181053	up	NPS233-1_vs_NPS233-2
Glyma.10G112000	RecName: Full=Copper transport protein CCH; AltName: Full=Copper chaperone CCH;	1.55725	0.000690925	0.0099431	up	NPS233-1_vs_NPS233-2
Glyma.10G256400	--	1.56431	6.87257e-06	0.000228312	up	NPS233-1_vs_NPS233-2
Glyma.09G042500	--	1.57199	0.00159983	0.0194816	up	NPS233-1_vs_NPS233-2
Glyma.03G224600	RecName: Full=Probable polygalacturonase; Short=PG {ECO:0000250|UniProtKB:Q7M1E7}; EC=3.2.1.15; AltName: Full=Pectinase {ECO:0000250|UniProtKB:Q7M1E7};	1.57258	4.77984e-05	0.0011365	up	NPS233-1_vs_NPS233-2
Glyma.16G166600	--	1.57331	0.000193387	0.00355674	up	NPS233-1_vs_NPS233-2
Glyma.08G327100	RecName: Full=Cytochrome P450 71D11; EC=1.14.-.-; Flags: Fragment;	1.57369	3.8605e-05	0.000957205	up	NPS233-1_vs_NPS233-2
Glyma.17G008200	RecName: Full=F-box protein CPR1; AltName: Full=Protein CONSTITUTIVE EXPRESSER OF PR GENES 1; AltName: Full=Protein CONSTITUTIVE EXPRESSER OF PR GENES 30 {ECO:0000303|PubMed:19682297};	1.57487	0.000434845	0.00687687	up	NPS233-1_vs_NPS233-2
Glyma.11G222600	RecName: Full=Protein phosphatase 2C 37; Short=AtPP2C37; EC=3.1.3.16; AltName: Full=Protein ABA-HYPERSENSITIVE GERMINATION 3; AltName: Full=Protein phosphatase 2C A; Short=PP2CA;	1.57621	0.00371001	0.0373385	up	NPS233-1_vs_NPS233-2
Glyma.19G249500	RecName: Full=Single-stranded DNA-binding protein WHY2, mitochondrial; AltName: Full=Protein WHIRLY 2; Short=StWHY2; Flags: Precursor;	1.57957	0.00182687	0.0215932	up	NPS233-1_vs_NPS233-2
Glyma.19G136200	--	1.58056	0.00455099	0.0435465	up	NPS233-1_vs_NPS233-2
Glyma.14G215100	RecName: Full=HMG-Y-related protein A; AltName: Full=Protein SB16A;	1.58137	0.0024794	0.0274515	up	NPS233-1_vs_NPS233-2
Glyma.09G212500	RecName: Full=Growth-regulating factor 4; Short=OsGRF4; AltName: Full=Transcription activator GRF4;	1.58894	0.00171688	0.0205464	up	NPS233-1_vs_NPS233-2
Glyma.04G079400	RecName: Full=Nitrate regulatory gene2 protein {ECO:0000303|PubMed:26744214}; Short=NRG2 protein {ECO:0000303|PubMed:26744214};	1.59985	0.00415044	0.040548	up	NPS233-1_vs_NPS233-2
Glyma.02G241400	RecName: Full=Glutamate decarboxylase 1; Short=GAD 1; EC=4.1.1.15;	1.60079	4.99355e-06	0.000174184	up	NPS233-1_vs_NPS233-2
Glyma.13G131400	RecName: Full=Short-chain dehydrogenase TIC 32, chloroplastic; EC=1.1.1.-; AltName: Full=Translocon at the inner envelope membrane of chloroplasts 32; Short=PsTIC32;	1.60616	0.00487873	0.0459238	up	NPS233-1_vs_NPS233-2
Glyma.12G194400	RecName: Full=Homeobox-leucine zipper protein HDG2; AltName: Full=HD-ZIP protein HDG2; AltName: Full=Homeodomain GLABRA 2-like protein 2; AltName: Full=Homeodomain transcription factor HDG2; AltName: Full=Protein HOMEODOMAIN GLABROUS 2;	1.60834	0.000280999	0.00484854	up	NPS233-1_vs_NPS233-2
[truncated: 33,202 more rows]

## Sheet: diff2
Table S6. Differentially expressed genes detected.
ID	Swissprot	log2FoldChange	pvalue	padj	regulated	diff
Glyma.18G249800	RecName: Full=Subtilisin-like protease Glyma18g48580; EC=3.4.21.-; Contains: RecName: Full=Subtilase peptide GmSubPep; AltName: Full=Glycine max subtilase peptide; Short=GmSubPep; Flags: Precursor;	7.67102	2.18571e-47	6.88325e-43	up	NPS301-1_vs_NPS233-1
Glyma.12G232000	RecName: Full=ATP synthase subunit alpha, chloroplastic {ECO:0000255|HAMAP-Rule:MF_01346}; EC=3.6.3.14 {ECO:0000255|HAMAP-Rule:MF_01346}; AltName: Full=ATP synthase F1 sector subunit alpha {ECO:0000255|HAMAP-Rule:MF_01346}; AltName: Full=F-ATPase subunit alpha {ECO:0000255|HAMAP-Rule:MF_01346};	-5.31225	9.69663e-34	1.52683e-29	down	NPS301-1_vs_NPS233-1
Glyma.18G250100	RecName: Full=Subtilisin-like protease Glyma18g48580; EC=3.4.21.-; Contains: RecName: Full=Subtilase peptide GmSubPep; AltName: Full=Glycine max subtilase peptide; Short=GmSubPep; Flags: Precursor;	-3.24634	1.9368e-22	2.03313e-18	down	NPS301-1_vs_NPS233-1
Glyma.12G233400	RecName: Full=Protein trichome birefringence-like 41;	-4.66588	1.47804e-18	1.16366e-14	down	NPS301-1_vs_NPS233-1
Glyma.06G268700	RecName: Full=TMV resistance protein N;	4.43192	1.3144e-14	8.27859e-11	up	NPS301-1_vs_NPS233-1
Glyma.20G204500	RecName: Full=Protein SIEVE ELEMENT OCCLUSION B {ECO:0000303|PubMed:20932300}; Short=AtSEOb {ECO:0000303|PubMed:20932300}; AltName: Full=Protein SIEVE ELEMENT OCCLUSION-RELATED 1 {ECO:0000303|PubMed:22470058}; Short=AtSEOR1 {ECO:0000303|PubMed:22470058};	-9.38486	7.74442e-14	4.06479e-10	down	NPS301-1_vs_NPS233-1
Glyma.08G200100	RecName: Full=Stem 31 kDa glycoprotein; AltName: Full=Vegetative storage protein B; Flags: Precursor;	3.04302	2.68834e-13	1.20945e-09	up	NPS301-1_vs_NPS233-1
novel.779	RecName: Full=GTP-binding protein ERG;	9.19618	4.93577e-13	1.94297e-09	up	NPS301-1_vs_NPS233-1
novel.479	RecName: Full=Retinoblastoma-related protein; Short=MsRBR;	9.01652	8.28853e-13	2.90025e-09	up	NPS301-1_vs_NPS233-1
Glyma.08G123400	--	4.18244	1.29827e-12	4.08851e-09	up	NPS301-1_vs_NPS233-1
Glyma.07G150400	RecName: Full=GDSL esterase/lipase CPRD49; EC=3.1.1.-; AltName: Full=Extracellular lipase CPRD49; Flags: Precursor;	-3.99707	2.08803e-12	5.97784e-09	down	NPS301-1_vs_NPS233-1
Glyma.13G342800	--	-6.35839	3.46735e-12	8.72302e-09	down	NPS301-1_vs_NPS233-1
Glyma.09G026100	RecName: Full=Tubulin beta-3 chain; AltName: Full=Beta-3-tubulin;	-2.52177	3.86147e-12	8.72302e-09	down	NPS301-1_vs_NPS233-1
novel.1169	RecName: Full=Anamorsin homolog {ECO:0000255|HAMAP-Rule:MF_03115}; AltName: Full=Fe-S cluster assembly protein DRE2 homolog {ECO:0000255|HAMAP-Rule:MF_03115};	-8.58963	3.87788e-12	8.72302e-09	down	NPS301-1_vs_NPS233-1
Glyma.19G120400	RecName: Full=Probable 2-isopropylmalate synthase; EC=2.3.3.13; AltName: Full=Alpha-IPM synthase; AltName: Full=Alpha-isopropylmalate synthase; AltName: Full=Late nodulin-56; Short=N-56;	-2.41027	6.40082e-12	1.34383e-08	down	NPS301-1_vs_NPS233-1
Glyma.12G042800	RecName: Full=Transcription factor bHLH63; AltName: Full=Basic helix-loop-helix protein 63; Short=AtbHLH63; Short=bHLH 63; AltName: Full=Protein CRYPTOCHROME INTERACTING BASIC-HELIX-LOOP-HELIX 1; AltName: Full=Transcription factor EN 84; AltName: Full=bHLH transcription factor bHLH063;	3.61358	1.32473e-11	2.60739e-08	up	NPS301-1_vs_NPS233-1
novel.592	RecName: Full=Retrovirus-related Pol polyprotein from transposon TNT 1-94; Includes: RecName: Full=Protease; EC=3.4.23.-; Includes: RecName: Full=Reverse transcriptase; EC=2.7.7.49; Includes: RecName: Full=Endonuclease;	8.6553	1.45738e-11	2.69976e-08	up	NPS301-1_vs_NPS233-1
Glyma.16G162600	RecName: Full=Chlorophyll a-b binding protein 3, chloroplastic; AltName: Full=LHCII type I CAB-3; Short=LHCP; Flags: Precursor;	4.04548	4.03796e-11	7.06464e-08	up	NPS301-1_vs_NPS233-1
Glyma.19G114700	--	-2.27095	7.82327e-11	1.29669e-07	down	NPS301-1_vs_NPS233-1
novel.667	--	8.54269	1.29827e-10	2.04426e-07	up	NPS301-1_vs_NPS233-1
Glyma.15G062300	RecName: Full=Basic form of pathogenesis-related protein 1; Short=PRP 1; Flags: Precursor;	-2.45507	1.87828e-10	2.8167e-07	down	NPS301-1_vs_NPS233-1
novel.233	--	8.14956	2.66928e-10	3.82096e-07	up	NPS301-1_vs_NPS233-1
Glyma.20G145300	RecName: Full=Primary amine oxidase; EC=1.4.3.21 {ECO:0000250|UniProtKB:P12807}; AltName: Full=Amine oxidase [copper-containing]; Flags: Precursor;	5.50373	3.01517e-10	4.12843e-07	up	NPS301-1_vs_NPS233-1
novel.191	--	8.10065	4.80685e-10	6.20161e-07	up	NPS301-1_vs_NPS233-1
novel.18	RecName: Full=CRM-domain containing factor CFM2, chloroplastic {ECO:0000305}; AltName: Full=Protein CRM FAMILY MEMBER 2 {ECO:0000303|PubMed:18065687}; Short=AtCFM2 {ECO:0000303|PubMed:18065687}; Flags: Precursor;	8.03376	4.92316e-10	6.20161e-07	up	NPS301-1_vs_NPS233-1
Glyma.16G134000	RecName: Full=Salicylate carboxymethyltransferase; EC=2.1.1.274; AltName: Full=S-adenosyl-L-methionine:salicylate acid carboxylmethyltransferase; Short=CbSAMT; AltName: Full=Salicylate O-methyltransferase;	6.61538	5.36268e-10	6.49544e-07	up	NPS301-1_vs_NPS233-1
novel.487	--	7.95161	5.76756e-10	6.72711e-07	up	NPS301-1_vs_NPS233-1
Glyma.02G028700	RecName: Full=Metalloendoproteinase 5-MMP {ECO:0000303|PubMed:10574937}; Short=At5-MMP {ECO:0000303|PubMed:10574937}; EC=3.4.24.- {ECO:0000305}; Flags: Precursor;	-7.89179	8.8003e-10	9.89782e-07	down	NPS301-1_vs_NPS233-1
novel.256	RecName: Full=Single-stranded DNA-binding protein, mitochondrial; Flags: Precursor;	7.8638	1.0022e-09	1.08832e-06	up	NPS301-1_vs_NPS233-1
novel.365	RecName: Full=ATP-dependent 6-phosphofructokinase 3 {ECO:0000255|HAMAP-Rule:MF_03186}; Short=ATP-PFK 3 {ECO:0000255|HAMAP-Rule:MF_03186}; Short=Phosphofructokinase 3 {ECO:0000255|HAMAP-Rule:MF_03186}; EC=2.7.1.11 {ECO:0000255|HAMAP-Rule:MF_03186}; AltName: Full=Phosphohexokinase 3 {ECO:0000255|HAMAP-Rule:MF_03186};	7.80829	1.49923e-09	1.57379e-06	up	NPS301-1_vs_NPS233-1
Glyma.03G048000	RecName: Full=DDT domain-containing protein DDR4 {ECO:0000305}; AltName: Full=DDT-related protein 4 {ECO:0000303|PubMed:23691993};	7.8725	1.68884e-09	1.71564e-06	up	NPS301-1_vs_NPS233-1
novel.1109	RecName: Full=Mediator of RNA polymerase II transcription subunit 12; AltName: Full=Protein CENTER CITY; AltName: Full=Protein CRYPTIC PRECOCIOUS;	7.76416	2.13123e-09	2.0974e-06	up	NPS301-1_vs_NPS233-1
Glyma.19G001700	RecName: Full=Methionine aminopeptidase 2B {ECO:0000255|HAMAP-Rule:MF_03175}; Short=MAP 2B {ECO:0000255|HAMAP-Rule:MF_03175}; Short=MetAP 2B {ECO:0000255|HAMAP-Rule:MF_03175}; EC=3.4.11.18 {ECO:0000255|HAMAP-Rule:MF_03175}; AltName: Full=Peptidase M {ECO:0000255|HAMAP-Rule:MF_03175};	4.96994	2.63935e-09	2.51874e-06	up	NPS301-1_vs_NPS233-1
novel.106	--	7.8715	3.14789e-09	2.91569e-06	up	NPS301-1_vs_NPS233-1
novel.367	--	7.69298	4.28542e-09	3.8559e-06	up	NPS301-1_vs_NPS233-1
novel.269	--	7.79726	4.85657e-09	4.24842e-06	up	NPS301-1_vs_NPS233-1
novel.288	RecName: Full=Shikimate kinase 1, chloroplastic; Short=AtSK1; EC=2.7.1.71; Flags: Precursor;	7.55611	6.92772e-09	5.89642e-06	up	NPS301-1_vs_NPS233-1
Glyma.08G188400	RecName: Full=Transmembrane 9 superfamily member 1 {ECO:0000305}; AltName: Full=Endomembrane protein 12 {ECO:0000303|PubMed:22570441}; AltName: Full=Transmembrane nine protein 1 {ECO:0000303|PubMed:20681974}; Short=AtTMN1 {ECO:0000303|PubMed:20681974}; Flags: Precursor;	-3.20427	8.27908e-09	6.86118e-06	down	NPS301-1_vs_NPS233-1
novel.304	--	7.48689	9.4335e-09	7.61743e-06	up	NPS301-1_vs_NPS233-1
Glyma.04G103000	RecName: Full=DNA oxidative demethylase ALKBH2; EC=1.14.11.33; AltName: Full=Alkylated DNA repair protein alkB homolog 2; AltName: Full=Alpha-ketoglutarate-dependent dioxygenase alkB homolog 2;	-2.66693	1.20264e-08	9.46842e-06	down	NPS301-1_vs_NPS233-1
novel.201	--	-7.24946	1.36491e-08	1.04838e-05	down	NPS301-1_vs_NPS233-1
novel.792	RecName: Full=Trans-cinnamate 4-monooxygenase; EC=1.14.13.11; AltName: Full=Cinnamic acid 4-hydroxylase; Short=C4H; Short=CA4H; AltName: Full=Cytochrome P450 73; AltName: Full=Cytochrome P450C4H;	7.4751	1.8031e-08	1.35198e-05	up	NPS301-1_vs_NPS233-1
Glyma.02G246300	--	7.37996	1.9411e-08	1.42161e-05	up	NPS301-1_vs_NPS233-1
novel.1094	--	-7.31876	1.98835e-08	1.42312e-05	down	NPS301-1_vs_NPS233-1
novel.596	RecName: Full=Beta-adaptin-like protein C; Short=At-bC-Ad; Short=At-betaC-Ad; AltName: Full=AP complex subunit beta-C; AltName: Full=Adaptor protein complex AP subunit beta-C; AltName: Full=Beta-adaptin C; AltName: Full=Clathrin assembly protein complex beta large chain C;	-7.18099	2.26125e-08	1.58247e-05	down	NPS301-1_vs_NPS233-1
Glyma.02G293700	--	5.68924	2.34301e-08	1.60405e-05	up	NPS301-1_vs_NPS233-1
Glyma.09G184300	RecName: Full=Serine hydroxymethyltransferase 2, mitochondrial; Short=SHMT2; EC=2.1.2.1; AltName: Full=Glycine hydroxymethyltransferase 2; AltName: Full=Serine methylase 2; Flags: Precursor;	-7.1179	2.57973e-08	1.72853e-05	down	NPS301-1_vs_NPS233-1
Glyma.12G141400	RecName: Full=Anamorsin homolog {ECO:0000255|HAMAP-Rule:MF_03115}; AltName: Full=Fe-S cluster assembly protein DRE2 homolog {ECO:0000255|HAMAP-Rule:MF_03115};	4.50665	2.64411e-08	1.73476e-05	up	NPS301-1_vs_NPS233-1
Glyma.08G177100	--	-2.71516	2.8195e-08	1.81208e-05	down	NPS301-1_vs_NPS233-1
Glyma.03G066600	RecName: Full=NADPH-dependent aldo-keto reductase, chloroplastic {ECO:0000303|PubMed:21169366}; Short=AtChlAKR {ECO:0000303|PubMed:21169366}; EC=1.1.1.- {ECO:0000269|PubMed:19616008, ECO:0000269|PubMed:21169366}; AltName: Full=Aldo-keto reductase family 4 member C9;	2.96329	3.522e-08	2.20785e-05	up	NPS301-1_vs_NPS233-1
novel.604	--	7.45618	3.57553e-08	2.20785e-05	up	NPS301-1_vs_NPS233-1
Glyma.10G285300	RecName: Full=E3 ubiquitin-protein ligase RING1-like; EC=2.3.2.27; AltName: Full=RING finger protein 1; AltName: Full=RING-type E3 ubiquitin transferase RING1-like {ECO:0000305};	-7.08694	3.64708e-08	2.20873e-05	down	NPS301-1_vs_NPS233-1
Glyma.07G036400	RecName: Full=Phospholipid:diacylglycerol acyltransferase 1; Short=AtPDAT; EC=2.3.1.158 {ECO:0000250|UniProtKB:O94680};	-2.43247	3.72018e-08	2.21049e-05	down	NPS301-1_vs_NPS233-1
Glyma.11G241500	RecName: Full=LanC-like protein GCL1; AltName: Full=G protein-coupled receptor 2-like protein 1; Short=Protein GCR2-like 1;	-7.0581	3.79219e-08	2.21155e-05	down	NPS301-1_vs_NPS233-1
novel.122	--	7.28486	4.15289e-08	2.37787e-05	up	NPS301-1_vs_NPS233-1
novel.530	RecName: Full=Respiratory burst oxidase homolog protein B; EC=1.11.1.-; EC=1.6.3.-; AltName: Full=NADPH oxidase RBOHB; AltName: Full=StRBOHB;	7.2297	4.80094e-08	2.68164e-05	up	NPS301-1_vs_NPS233-1
Glyma.16G117900	--	6.21435	4.85373e-08	2.68164e-05	up	NPS301-1_vs_NPS233-1
Glyma.07G183200	RecName: Full=UDP-glycosyltransferase 78D2; EC=2.4.1.-; AltName: Full=Anthocyanin 3-O-glucosyltransferase; AltName: Full=Flavonol 3-O-glucosyltransferase; EC=2.4.1.91; AltName: Full=UDP glucose:flavonoid 3-O-glucosyltransferase;	-6.90428	4.96896e-08	2.69798e-05	down	NPS301-1_vs_NPS233-1
novel.989	RecName: Full=Villin-5 {ECO:0000303|PubMed:20807878};	-7.16253	6.59471e-08	3.52001e-05	down	NPS301-1_vs_NPS233-1
Glyma.16G171900	RecName: Full=PH, RCC1 and FYVE domains-containing protein 1 {ECO:0000303|PubMed:11563980}; AltName: Full=Protein Praf4 {ECO:0000303|PubMed:15358268};	-6.95481	6.99463e-08	3.67125e-05	down	NPS301-1_vs_NPS233-1
Glyma.17G059800	RecName: Full=Subtilisin-like protease SBT2.6 {ECO:0000303|PubMed:16193095}; EC=3.4.21.- {ECO:0000255|PROSITE-ProRule:PRU10082}; AltName: Full=Subtilase subfamily 2 member 6 {ECO:0000303|PubMed:16193095}; Short=AtSBT2.6 {ECO:0000303|PubMed:16193095}; Flags: Precursor;	-1.86815	7.58781e-08	3.9173e-05	down	NPS301-1_vs_NPS233-1
novel.603	RecName: Full=Cytochrome P450 714B3; EC=1.14.-.-;	7.15177	7.74114e-08	3.932e-05	up	NPS301-1_vs_NPS233-1
novel.147	RecName: Full=Probable indole-3-pyruvate monooxygenase YUCCA9; EC=1.14.13.168; AltName: Full=Flavin-containing monooxygenase YUCCA9;	-1.9513	8.07074e-08	4.03434e-05	down	NPS301-1_vs_NPS233-1
Glyma.02G028200	RecName: Full=Metalloendoproteinase 5-MMP {ECO:0000303|PubMed:10574937}; Short=At5-MMP {ECO:0000303|PubMed:10574937}; EC=3.4.24.- {ECO:0000305}; Flags: Precursor;	12.2452	9.21038e-08	4.53208e-05	up	NPS301-1_vs_NPS233-1
Glyma.17G205900	RecName: Full=DUF21 domain-containing protein At1g47330; AltName: Full=CBS domain-containing protein CBSDUF7;	6.70631	9.81836e-08	4.75692e-05	up	NPS301-1_vs_NPS233-1
Glyma.18G157300	RecName: Full=40S ribosomal protein S8;	1.52168	1.13552e-07	5.41813e-05	up	NPS301-1_vs_NPS233-1
Glyma.15G165400	--	7.30555	1.2212e-07	5.74003e-05	up	NPS301-1_vs_NPS233-1
Glyma.16G014300	--	-2.9129	1.34429e-07	6.22563e-05	down	NPS301-1_vs_NPS233-1
Glyma.08G108800	RecName: Full=Adenosylhomocysteinase; Short=AdoHcyase; EC=3.3.1.1; AltName: Full=Cytokinin-binding protein CBP57; AltName: Full=S-adenosyl-L-homocysteine hydrolase;	-1.36784	1.50974e-07	6.89052e-05	down	NPS301-1_vs_NPS233-1
novel.578	RecName: Full=ATP-dependent Clp protease ATP-binding subunit CLPT2, chloroplastic {ECO:0000303|Ref.6}; Flags: Precursor;	-6.84614	1.59678e-07	7.08978e-05	down	NPS301-1_vs_NPS233-1
Glyma.10G142500	--	-3.01025	1.59842e-07	7.08978e-05	down	NPS301-1_vs_NPS233-1
novel.692	--	7.01557	1.75703e-07	7.68504e-05	up	NPS301-1_vs_NPS233-1
novel.258	--	-6.77568	1.89878e-07	8.18644e-05	down	NPS301-1_vs_NPS233-1
Glyma.18G022500	RecName: Full=Alpha-soluble NSF attachment protein; Short=Alpha-SNAP; AltName: Full=N-ethylmaleimide-sensitive factor attachment protein alpha;	-1.5994	1.92365e-07	8.18644e-05	down	NPS301-1_vs_NPS233-1
Glyma.01G142400	RecName: Full=RuBisCO-associated protein;	2.85539	2.09383e-07	8.79186e-05	up	NPS301-1_vs_NPS233-1
Glyma.13G188800	RecName: Full=Cysteine-rich receptor-like protein kinase 10; Short=Cysteine-rich RLK10; EC=2.7.11.-; AltName: Full=Receptor-like protein kinase 4; Flags: Precursor;	7.02148	2.14125e-07	8.87266e-05	up	NPS301-1_vs_NPS233-1
Glyma.16G210600	RecName: Full=TMV resistance protein N;	-3.42462	2.24902e-07	9.13033e-05	down	NPS301-1_vs_NPS233-1
novel.1065	--	-5.01613	2.26142e-07	9.13033e-05	down	NPS301-1_vs_NPS233-1
novel.539	RecName: Full=Retrovirus-related Pol polyprotein from transposon TNT 1-94; Includes: RecName: Full=Protease; EC=3.4.23.-; Includes: RecName: Full=Reverse transcriptase; EC=2.7.7.49; Includes: RecName: Full=Endonuclease;	-6.69305	2.61555e-07	0.000104264	down	NPS301-1_vs_NPS233-1
Glyma.12G135500	RecName: Full=Pentatricopeptide repeat-containing protein At4g04790, mitochondrial; Flags: Precursor;	6.67671	2.97856e-07	0.000117251	up	NPS301-1_vs_NPS233-1
Glyma.04G184300	RecName: Full=Triose phosphate/phosphate translocator, non-green plastid, chloroplastic; Short=CTPT; Flags: Precursor;	-2.32056	3.46867e-07	0.000134859	down	NPS301-1_vs_NPS233-1
novel.932	--	-6.62893	3.94055e-07	0.000151336	down	NPS301-1_vs_NPS233-1
Glyma.10G107400	--	2.35271	4.14083e-07	0.000155872	up	NPS301-1_vs_NPS233-1
novel.485	--	6.85335	4.15765e-07	0.000155872	up	NPS301-1_vs_NPS233-1
Glyma.13G098600	RecName: Full=Villin-4 {ECO:0000303|PubMed:10631247};	4.3464	4.39938e-07	0.000162994	up	NPS301-1_vs_NPS233-1
Glyma.02G016500	RecName: Full=Probable pectinesterase/pectinesterase inhibitor 40; Includes: RecName: Full=Pectinesterase inhibitor 40; AltName: Full=Pectin methylesterase inhibitor 40; Includes: RecName: Full=Pectinesterase 40; Short=PE 40; EC=3.1.1.11; AltName: Full=Pectin methylesterase 40; Short=AtPME40; Flags: Precursor;	-2.59067	5.19904e-07	0.000190382	down	NPS301-1_vs_NPS233-1
novel.85	--	-6.60048	5.83245e-07	0.000211121	down	NPS301-1_vs_NPS233-1
novel.494	RecName: Full=CLIP-associated protein; Short=AtCLASP;	6.79423	5.98086e-07	0.000212304	up	NPS301-1_vs_NPS233-1
novel.838	RecName: Full=Phospholipase D gamma 3 {ECO:0000303|PubMed:11891260}; Short=AtPLDgamma3 {ECO:0000303|PubMed:11891260}; Short=PLD gamma 3 {ECO:0000303|PubMed:11891260}; EC=3.1.4.4 {ECO:0000250|UniProtKB:Q9T053};	-6.92016	5.99995e-07	0.000212304	down	NPS301-1_vs_NPS233-1
Glyma.06G238100	RecName: Full=Squamosa promoter-binding-like protein 4;	4.22266	7.33694e-07	0.000256728	up	NPS301-1_vs_NPS233-1
Glyma.01G021000	RecName: Full=Probable mannitol dehydrogenase; EC=1.1.1.255; AltName: Full=NAD-dependent mannitol dehydrogenase;	2.72092	7.72586e-07	0.000267366	up	NPS301-1_vs_NPS233-1
Glyma.07G197000	--	-2.32745	8.09248e-07	0.000277009	down	NPS301-1_vs_NPS233-1
Glyma.06G102000	RecName: Full=Protein EXORDIUM; Flags: Precursor;	-4.09492	1.01886e-06	0.000345011	down	NPS301-1_vs_NPS233-1
novel.322	RecName: Full=Protein ACTIVITY OF BC1 COMPLEX KINASE 8, chloroplastic {ECO:0000303|PubMed:22694836}; Short=ABC1-LIKE KINASE 8 {ECO:0000303|PubMed:22694836}; EC=2.7.11.1 {ECO:0000250|UniProtKB:Q9MA15}; AltName: Full=ABC2 homolog protein 13 {ECO:0000303|PubMed:11346655}; Short=AtATH13 {ECO:0000303|PubMed:11346655}; AltName: Full=Oxidative stress-related ABC1-like protein 1, chloroplastic {ECO:00003…	6.73274	1.17133e-06	0.000392421	up	NPS301-1_vs_NPS233-1
Glyma.16G136600	RecName: Full=TMV resistance protein N;	-3.95044	1.20283e-06	0.000398732	down	NPS301-1_vs_NPS233-1
Glyma.08G192400	--	3.30037	1.22952e-06	0.000403334	up	NPS301-1_vs_NPS233-1
novel.859	--	-6.61469	1.27272e-06	0.000411392	down	NPS301-1_vs_NPS233-1
Glyma.18G061300	RecName: Full=Gibberellin 2-beta-dioxygenase 8; EC=1.14.11.13; AltName: Full=GA 2-oxidase 8; AltName: Full=Gibberellin 2-beta-hydroxylase 8; AltName: Full=Gibberellin 2-oxidase 8;	6.97286	1.28021e-06	0.000411392	up	NPS301-1_vs_NPS233-1
Glyma.20G152200	RecName: Full=DEAD-box ATP-dependent RNA helicase 7; EC=3.6.4.13;	-2.2117	1.33868e-06	0.000425836	down	NPS301-1_vs_NPS233-1
Glyma.07G000600	--	6.16969	1.42744e-06	0.000445044	up	NPS301-1_vs_NPS233-1
Glyma.04G114600	--	-6.45312	1.42956e-06	0.000445044	down	NPS301-1_vs_NPS233-1
Glyma.07G196000	RecName: Full=E3 ubiquitin-protein ligase RMA1H1; EC=2.3.2.27; AltName: Full=Protein RING membrane-anchor 1 homolog 1; AltName: Full=RING-type E3 ubiquitin transferase RMA1H1 {ECO:0000305};	-2.18938	1.44146e-06	0.000445044	down	NPS301-1_vs_NPS233-1
Glyma.18G146400	RecName: Full=Chromatin remodeling protein SHL {ECO:0000305}; AltName: Full=Protein SHORT LIFE {ECO:0000303|PubMed:11129039};	-6.47384	1.49687e-06	0.000457663	down	NPS301-1_vs_NPS233-1
Glyma.09G055100	RecName: Full=Non-specific lipid-transfer protein A; Short=NS-LTP A; AltName: Full=Phospholipid transfer protein; Short=PLTP;	-4.78952	1.56191e-06	0.000472958	down	NPS301-1_vs_NPS233-1
novel.251	--	-6.34565	1.63744e-06	0.000491108	down	NPS301-1_vs_NPS233-1
Glyma.14G071000	RecName: Full=26S proteasome regulatory subunit 10B homolog A; AltName: Full=26S proteasome AAA-ATPase subunit RPT4a; AltName: Full=26S proteasome subunit 10B homolog A; AltName: Full=Regulatory particle triple-A ATPase subunit 4a;	-2.83094	2.00662e-06	0.000596154	down	NPS301-1_vs_NPS233-1
novel.891	--	-6.30248	2.10284e-06	0.000618904	down	NPS301-1_vs_NPS233-1
Glyma.04G110500	--	-6.35458	2.15987e-06	0.000629802	down	NPS301-1_vs_NPS233-1
Glyma.05G148900	RecName: Full=Probable DNA primase large subunit; EC=2.7.7.-;	-2.0945	2.57912e-06	0.000745153	down	NPS301-1_vs_NPS233-1
Glyma.13G342400	RecName: Full=Pre-mRNA-splicing factor ATP-dependent RNA helicase DEAH7 {ECO:0000305}; EC=3.6.4.13; AltName: Full=DEAH RNA helicase homolog PRP16 {ECO:0000303|PubMed:17008405, ECO:0000303|PubMed:26237376}; AltName: Full=Protein CLUMSY VEIN {ECO:0000303|PubMed:25384462}; AltName: Full=Protein EMBRYO DEFECTIVE 3011 {ECO:0000305}; AltName: Full=Protein PSR1-INTERACTING PROTEIN 1 {ECO:0000303|PubMed:…	-6.0145	2.79376e-06	0.000799828	down	NPS301-1_vs_NPS233-1
novel.490	RecName: Full=Linoleate 9S-lipoxygenase-4; EC=1.13.11.58; AltName: Full=Lipoxygenase-4; Short=L-4; AltName: Full=VSP94;	-6.38321	3.07286e-06	0.000871808	down	NPS301-1_vs_NPS233-1
Glyma.08G067300	RecName: Full=Costars family protein;	-6.3393	3.37799e-06	0.000949819	down	NPS301-1_vs_NPS233-1
Glyma.04G022600	RecName: Full=CO(2)-response secreted protease {ECO:0000303|PubMed:25043023}; AltName: Full=Subtilisin-like serine protease {ECO:0000303|PubMed:25043023}; Short=AtSBT5.2 {ECO:0000303|PubMed:25043023}; AltName: Full=Tripeptidyl-peptidase II {ECO:0000255|PROSITE-ProRule:PRU10081}; EC=3.4.14.10 {ECO:0000255|PROSITE-ProRule:PRU10081}; Flags: Precursor;	-6.23086	3.4088e-06	0.000949998	down	NPS301-1_vs_NPS233-1
Glyma.03G148900	--	6.67444	3.46422e-06	0.000956975	up	NPS301-1_vs_NPS233-1
novel.1012	--	-6.21219	3.60545e-06	0.000987328	down	NPS301-1_vs_NPS233-1
novel.820	RecName: Full=Cysteine proteinase 15A; EC=3.4.22.-; AltName: Full=Turgor-responsive protein 15A; Flags: Precursor;	5.3698	4.25765e-06	0.00115588	up	NPS301-1_vs_NPS233-1
novel.943	--	-6.15718	4.55331e-06	0.00122558	down	NPS301-1_vs_NPS233-1
Glyma.07G196500	RecName: Full=Probable ubiquitin-conjugating enzyme E2 24 {ECO:0000303|PubMed:16339806}; EC=2.3.2.23 {ECO:0000305}; AltName: Full=AtPHO2 {ECO:0000303|PubMed:16679424}; AltName: Full=E2 ubiquitin-conjugating enzyme 24 {ECO:0000303|PubMed:16339806}; AltName: Full=Ubiquitin carrier protein 24 {ECO:0000303|PubMed:16339806}; AltName: Full=Ubiquitin-protein ligase 24 {ECO:0000303|PubMed:16339806};	-2.22356	4.93465e-06	0.00131697	down	NPS301-1_vs_NPS233-1
novel.945	--	-6.14752	5.43483e-06	0.00143827	down	NPS301-1_vs_NPS233-1
Glyma.05G235600	RecName: Full=30S ribosomal protein S18, chloroplastic {ECO:0000255|HAMAP-Rule:MF_00270};	4.4486	5.98011e-06	0.00156938	up	NPS301-1_vs_NPS233-1
novel.327	RecName: Full=Retrovirus-related Pol polyprotein from transposon RE2; AltName: Full=Retro element 2 {ECO:0000303|PubMed:10689195}; Short=AtRE2 {ECO:0000303|PubMed:10689195}; Includes: RecName: Full=Protease RE2; EC=3.4.23.-; Includes: RecName: Full=Reverse transcriptase RE2; EC=2.7.7.49; Includes: RecName: Full=Endonuclease RE2;	6.57498	6.09157e-06	0.00157529	up	NPS301-1_vs_NPS233-1
novel.1038	--	6.44741	6.10266e-06	0.00157529	up	NPS301-1_vs_NPS233-1
Glyma.11G002200	RecName: Full=Magnesium transporter MRS2-3; AltName: Full=Magnesium Transporter 4; Short=AtMGT4;	2.32391	6.203e-06	0.00158817	up	NPS301-1_vs_NPS233-1
Glyma.02G056400	RecName: Full=1-acylglycerol-3-phosphate O-acyltransferase; EC=2.3.1.51; AltName: Full=Lipid droplet-binding protein CGI-58 homolog;	-6.06708	6.55944e-06	0.00166589	down	NPS301-1_vs_NPS233-1
novel.1026	--	5.26321	6.98346e-06	0.00175938	up	NPS301-1_vs_NPS233-1
Glyma.15G219700	RecName: Full=Transcription factor MYB35 {ECO:0000303|PubMed:9839469}; AltName: Full=Myb-related protein 35 {ECO:0000303|PubMed:9839469}; Short=AtMYB35 {ECO:0000303|PubMed:9839469}; AltName: Full=Protein DEFECTIVE IN TAPETAL DEVELOPMENT AND FUNCTION 1 {ECO:0000303|PubMed:18397379};	5.89228	7.94889e-06	0.00198672	up	NPS301-1_vs_NPS233-1
Glyma.03G068200	RecName: Full=Trypsin inhibitor; Contains: RecName: Full=Trypsin inhibitor chain A; Contains: RecName: Full=Trypsin inhibitor chain B; Flags: Precursor;	6.87817	8.88728e-06	0.00220377	up	NPS301-1_vs_NPS233-1
novel.362	--	-6.10388	9.33636e-06	0.00229704	down	NPS301-1_vs_NPS233-1
Glyma.03G103100	RecName: Full=40S ribosomal protein SA {ECO:0000255|HAMAP-Rule:MF_03015}; AltName: Full=p40;	6.30206	1.09117e-05	0.00265454	up	NPS301-1_vs_NPS233-1
Glyma.08G317400	RecName: Full=Disease resistance protein RPM1; AltName: Full=Resistance to Pseudomonas syringae protein 3;	-5.97547	1.0958e-05	0.00265454	down	NPS301-1_vs_NPS233-1
Glyma.04G035000	RecName: Full=Allene oxide synthase 1, chloroplastic {ECO:0000303|PubMed:12351632}; Short=LeAOS1 {ECO:0000303|PubMed:12351632}; EC=4.2.1.92 {ECO:0000305}; AltName: Full=Cytochrome P450 74A {ECO:0000305}; Flags: Precursor;	6.24908	1.10906e-05	0.00266613	up	NPS301-1_vs_NPS233-1
novel.713	--	-3.04237	1.19616e-05	0.00285374	down	NPS301-1_vs_NPS233-1
novel.1171	--	-5.96496	1.21028e-05	0.00286572	down	NPS301-1_vs_NPS233-1
Glyma.07G039000	RecName: Full=Auxin-binding protein ABP19b; Flags: Precursor;	-5.81336	1.42426e-05	0.00334723	down	NPS301-1_vs_NPS233-1
Glyma.15G217100	RecName: Full=MLP-like protein 43;	-1.10098	1.4754e-05	0.00344173	down	NPS301-1_vs_NPS233-1
novel.853	--	6.34585	1.49587e-05	0.00346382	up	NPS301-1_vs_NPS233-1
Glyma.17G065300	RecName: Full=Probable xyloglucan endotransglucosylase/hydrolase protein 23; Short=At-XTH23; Short=XTH-23; EC=2.4.1.207; Flags: Precursor;	-4.45859	1.58271e-05	0.00363816	down	NPS301-1_vs_NPS233-1
Glyma.16G014100	RecName: Full=Pectinesterase/pectinesterase inhibitor 3; Includes: RecName: Full=Pectinesterase inhibitor 3; AltName: Full=Pectin methylesterase inhibitor 3; Includes: RecName: Full=Pectinesterase 3; Short=PE 3; EC=3.1.1.11; AltName: Full=Pectin methylesterase 27; Short=AtPME27; AltName: Full=Pectin methylesterase 3; Flags: Precursor;	-1.70636	1.66202e-05	0.00379277	down	NPS301-1_vs_NPS233-1
Glyma.07G050300	RecName: Full=Endonuclease 2; Short=AtENDO2; EC=3.1.30.1; AltName: Full=Deoxyribonuclease ENDO2; AltName: Full=Single-stranded-nucleate endonuclease ENDO2; Flags: Precursor;	2.36132	1.78569e-05	0.00404568	up	NPS301-1_vs_NPS233-1
Glyma.19G069300	RecName: Full=Rust resistance kinase Lr10 {ECO:0000312|EMBL:AAC49629.1}; EC=2.7.11.1; AltName: Full=Probable receptor-like serine/threonine-protein kinase LRK10; Flags: Precursor;	-5.85356	1.89746e-05	0.00426821	down	NPS301-1_vs_NPS233-1
novel.32	--	6.39775	1.91658e-05	0.00428064	up	NPS301-1_vs_NPS233-1
Glyma.U041300	RecName: Full=K(+) efflux antiporter 4 {ECO:0000303|PubMed:11500563}; Short=AtKEA4 {ECO:0000303|PubMed:11500563}; Flags: Precursor;	-5.89107	1.96678e-05	0.00434787	down	NPS301-1_vs_NPS233-1
Glyma.02G156800	RecName: Full=Lectin DB58; Contains: RecName: Full=Lectin DB58 subunit alpha; Contains: RecName: Full=Lectin DB58 subunit beta; Flags: Precursor;	1.87933	1.97837e-05	0.00434787	up	NPS301-1_vs_NPS233-1
Glyma.02G197100	--	-5.86639	1.9881e-05	0.00434787	down	NPS301-1_vs_NPS233-1
Glyma.17G149300	RecName: Full=Casein kinase II subunit beta-2 {ECO:0000305}; Short=CK II beta-2 {ECO:0000305};	5.70606	2.0043e-05	0.00435306	up	NPS301-1_vs_NPS233-1
Glyma.20G151500	RecName: Full=ATP sulfurylase 1, chloroplastic; Short=AtPS1; EC=2.7.7.4; Flags: Precursor;	1.85115	2.3959e-05	0.00513397	up	NPS301-1_vs_NPS233-1
Glyma.13G281700	RecName: Full=Tubulin-folding cofactor A; Short=AtTFCA; Short=CFA; AltName: Full=Protein KIESEL; AltName: Full=TCP1-chaperonin cofactor A; AltName: Full=Tubulin-specific chaperone A;	1.60631	2.39646e-05	0.00513397	up	NPS301-1_vs_NPS233-1
Glyma.04G112700	RecName: Full=COMPASS-like H3K4 histone methylase component WDR5A {ECO:0000303|PubMed:19567704}; Short=AtWDR5A {ECO:0000303|PubMed:19567704};	-4.83297	2.53105e-05	0.00536883	down	NPS301-1_vs_NPS233-1
novel.812	--	6.23625	2.54019e-05	0.00536883	up	NPS301-1_vs_NPS233-1
Glyma.16G031700	RecName: Full=Probable disease resistance protein At4g27220;	4.28405	2.75391e-05	0.00578173	up	NPS301-1_vs_NPS233-1
novel.847	--	6.06388	2.79801e-05	0.00583542	up	NPS301-1_vs_NPS233-1
Glyma.18G092500	--	-5.49763	2.88728e-05	0.00598199	down	NPS301-1_vs_NPS233-1
Glyma.16G136900	RecName: Full=TMV resistance protein N;	6.05751	3.00524e-05	0.00618569	up	NPS301-1_vs_NPS233-1
Glyma.06G311000	RecName: Full=Disease resistance protein RPM1; AltName: Full=Resistance to Pseudomonas syringae protein 3;	6.08701	3.13693e-05	0.00641481	up	NPS301-1_vs_NPS233-1
novel.794	--	-5.87022	3.34467e-05	0.00679551	down	NPS301-1_vs_NPS233-1
Glyma.08G127600	RecName: Full=Glutelin type-A 2; AltName: Full=Glutelin type II; Contains: RecName: Full=Glutelin type-A 2 acidic chain; Contains: RecName: Full=Glutelin type-A 2 basic chain; Flags: Precursor;	-1.70043	3.45943e-05	0.00698361	down	NPS301-1_vs_NPS233-1
Glyma.13G260200	--	-4.80918	3.48265e-05	0.00698571	down	NPS301-1_vs_NPS233-1
Glyma.06G202300	RecName: Full=Flavonoid 3'-monooxygenase; EC=1.14.13.21; AltName: Full=Cytochrome P450 75B2; AltName: Full=Flavonoid 3'-hydroxylase;	-1.6337	3.61667e-05	0.00720861	down	NPS301-1_vs_NPS233-1
Glyma.02G233300	--	-1.7256	3.68418e-05	0.00729699	down	NPS301-1_vs_NPS233-1
novel.11	RecName: Full=Vacuolar-processing enzyme; Short=VPE; EC=3.4.22.-; AltName: Full=Legumain-like proteinase; Short=LLP; Flags: Precursor;	-5.80382	3.81851e-05	0.00751578	down	NPS301-1_vs_NPS233-1
Glyma.06G291100	--	5.55464	3.89554e-05	0.00761204	up	NPS301-1_vs_NPS233-1
novel.116	--	2.45711	3.91576e-05	0.00761204	up	NPS301-1_vs_NPS233-1
Glyma.09G274300	RecName: Full=Vacuolar-sorting receptor 1; Short=AtVSR1; AltName: Full=BP80-like protein b; Short=AtBP80b; AltName: Full=Epidermal growth factor receptor-like protein 1; Short=AtELP; Short=AtELP1; AltName: Full=Spot 3 protein; Flags: Precursor;	-2.11446	4.08742e-05	0.007897	down	NPS301-1_vs_NPS233-1
Glyma.12G015100	RecName: Full=Alcohol dehydrogenase-like 2; EC=1.1.1.1 {ECO:0000250|UniProtKB:P06525};	2.44941	4.17788e-05	0.00802165	up	NPS301-1_vs_NPS233-1
novel.1093	--	-5.83587	4.21706e-05	0.00802165	down	NPS301-1_vs_NPS233-1
Glyma.18G091900	--	-1.47639	4.22835e-05	0.00802165	down	NPS301-1_vs_NPS233-1
Glyma.08G257300	RecName: Full=Ethylene-responsive transcription factor ERF115;	2.72103	4.55202e-05	0.00858397	up	NPS301-1_vs_NPS233-1
Glyma.10G119700	RecName: Full=65-kDa microtubule-associated protein 6; Short=AtMAP65-6;	-5.63165	5.20146e-05	0.00970944	down	NPS301-1_vs_NPS233-1
novel.1045	--	6.01498	5.21051e-05	0.00970944	up	NPS301-1_vs_NPS233-1
Glyma.17G062700	RecName: Full=Replication protein A 32 kDa subunit B; Short=AtRPA32B; Short=RP-A p32 B; AltName: Full=DNA replication protein A2 subunit B; AltName: Full=Replication factor A protein 2 B; Short=AtRPA2 B; Short=RF-A protein 2 B; AltName: Full=Replicon protein A2 B;	3.44344	5.24631e-05	0.00971863	up	NPS301-1_vs_NPS233-1
Glyma.14G204700	RecName: Full=Putative disease resistance protein At5g05400;	-1.65888	5.34949e-05	0.00984745	down	NPS301-1_vs_NPS233-1
Glyma.01G212000	RecName: Full=Putative transferase At4g12130, mitochondrial {ECO:0000305}; EC=2.1.-.- {ECO:0000305}; AltName: Full=Iron-sulfur cluster assembly factor homolog COG0354 {ECO:0000305}; Flags: Precursor;	2.82785	5.37839e-05	0.00984745	up	NPS301-1_vs_NPS233-1
Glyma.04G116200	--	5.42336	6.56493e-05	0.0119504	up	NPS301-1_vs_NPS233-1
Glyma.05G057100	RecName: Full=14 kDa proline-rich protein DC2.15; Flags: Precursor;	-1.70166	6.80029e-05	0.0123077	down	NPS301-1_vs_NPS233-1
Glyma.15G147100	RecName: Full=5'-3' exoribonuclease 3 {ECO:0000305}; Short=AtXRN3 {ECO:0000303|PubMed:11106401}; EC=3.1.13.- {ECO:0000269|PubMed:11106401}; AltName: Full=Protein EXORIBONUCLEASE 3 {ECO:0000305};	5.99688	6.89986e-05	0.012381	up	NPS301-1_vs_NPS233-1
novel.751	--	-1.71953	6.91941e-05	0.012381	down	NPS301-1_vs_NPS233-1
Glyma.08G199300	RecName: Full=Inositol oxygenase 1; EC=1.13.99.1; AltName: Full=Myo-inositol oxygenase 1; Short=AtMIOX1; Short=MI oxygenase 1;	2.58983	7.01977e-05	0.0124485	up	NPS301-1_vs_NPS233-1
novel.551	--	2.34728	7.03617e-05	0.0124485	up	NPS301-1_vs_NPS233-1
Glyma.13G030100	RecName: Full=HMG1/2-like protein; AltName: Full=Protein SB11;	-2.25925	7.34897e-05	0.0129293	down	NPS301-1_vs_NPS233-1
Glyma.18G230300	--	2.41875	7.72022e-05	0.0134666	up	NPS301-1_vs_NPS233-1
Glyma.07G195900	RecName: Full=Vesicle-fusing ATPase; EC=3.6.4.6; AltName: Full=N-ethylmaleimide-sensitive fusion protein; AltName: Full=Vesicular-fusion protein NSF;	-1.73671	7.7399e-05	0.0134666	down	NPS301-1_vs_NPS233-1
Glyma.12G022600	RecName: Full=Scarecrow-like protein 23; Short=AtSCL23; AltName: Full=GRAS family protein 28; Short=AtGRAS-28;	-2.53032	8.68137e-05	0.0150216	down	NPS301-1_vs_NPS233-1
Glyma.02G262500	RecName: Full=Ferritin-4, chloroplastic; EC=1.16.3.1; AltName: Full=SFerH-4; Flags: Precursor;	2.7135	9.41122e-05	0.0161955	up	NPS301-1_vs_NPS233-1
Glyma.12G222200	RecName: Full=Protochlorophyllide reductase, chloroplastic; Short=PCR; EC=1.3.1.33; AltName: Full=NADPH-protochlorophyllide oxidoreductase; Short=POR; Flags: Precursor;	1.31292	9.63708e-05	0.0164781	up	NPS301-1_vs_NPS233-1
Glyma.07G187700	RecName: Full=(3S,6E)-nerolidol synthase 1; Short=FaNES1; EC=4.2.3.48;	-5.55651	9.68008e-05	0.0164781	down	NPS301-1_vs_NPS233-1
Glyma.02G236000	--	5.80458	9.78277e-05	0.0165634	up	NPS301-1_vs_NPS233-1
Glyma.01G115100	RecName: Full=Clathrin light chain 2;	-5.48943	9.83987e-05	0.016571	down	NPS301-1_vs_NPS233-1
Glyma.20G014300	RecName: Full=Auxin efflux carrier component 3 {ECO:0000303|PubMed:11845211}; Short=AtPIN3 {ECO:0000303|PubMed:11845211};	-2.23777	9.97708e-05	0.0167127	down	NPS301-1_vs_NPS233-1
Glyma.18G156000	RecName: Full=Protein NETWORKED 1D {ECO:0000303|PubMed:22840520};	5.9084	0.000102576	0.0170917	up	NPS301-1_vs_NPS233-1
Glyma.18G109000	--	5.95689	0.000106302	0.0176194	up	NPS301-1_vs_NPS233-1
Glyma.17G174100	RecName: Full=Phospholipase A1-Igamma2, chloroplastic; EC=3.1.1.-; Flags: Precursor;	3.65802	0.000107744	0.0176951	up	NPS301-1_vs_NPS233-1
Glyma.13G207100	--	-1.64448	0.000107883	0.0176951	down	NPS301-1_vs_NPS233-1
Glyma.07G136100	RecName: Full=Tropinone reductase homolog; EC=1.1.1.-; AltName: Full=P29X;	-5.49933	0.000111745	0.0182336	down	NPS301-1_vs_NPS233-1
Glyma.14G055000	RecName: Full=DNA topoisomerase 3-beta; EC=5.99.1.2;	4.3514	0.000118806	0.0192857	up	NPS301-1_vs_NPS233-1
Glyma.08G318000	RecName: Full=Disease resistance protein RPM1; AltName: Full=Resistance to Pseudomonas syringae protein 3;	-3.56243	0.000120979	0.0195378	down	NPS301-1_vs_NPS233-1
novel.825	RecName: Full=Auxin-responsive protein IAA9; AltName: Full=Indoleacetic acid-induced protein 9;	-5.45316	0.00012258	0.0196953	down	NPS301-1_vs_NPS233-1
Glyma.18G113100	RecName: Full=Spermidine hydroxycinnamoyl transferase; EC=2.3.1.-; AltName: Full=BAHD-like hydroxycinnamoyl transferase;	-5.18632	0.000125302	0.0200305	down	NPS301-1_vs_NPS233-1
Glyma.14G205300	RecName: Full=Disease resistance protein At4g27190;	5.28437	0.000127145	0.0202225	up	NPS301-1_vs_NPS233-1
Glyma.01G123700	--	6.04333	0.000137368	0.0217386	up	NPS301-1_vs_NPS233-1
Glyma.16G053300	RecName: Full=Omega-hydroxypalmitate O-feruloyl transferase; EC=2.3.1.188; AltName: Full=Omega-hydroxyacid hydroxycinnamoyltransferase; AltName: Full=Protein ALIPHATIC SUBERIN FERULOYL TRANSFERASE;	-2.38998	0.000154349	0.0243037	down	NPS301-1_vs_NPS233-1
novel.1001	RecName: Full=G-type lectin S-receptor-like serine/threonine-protein kinase At1g61420; EC=2.7.11.1; Flags: Precursor;	-5.63451	0.000159455	0.0249829	down	NPS301-1_vs_NPS233-1
Glyma.17G023900	RecName: Full=Monothiol glutaredoxin-S2; Short=AtGrxS2; AltName: Full=Protein ROXY 10;	4.04287	0.000166594	0.0259721	up	NPS301-1_vs_NPS233-1
Glyma.14G201100	RecName: Full=Probable O-methyltransferase 3 {ECO:0000303|PubMed:18223037}; Short=HlOMT3 {ECO:0000303|PubMed:18223037}; EC=2.1.1.- {ECO:0000305};	2.87197	0.000168874	0.026198	up	NPS301-1_vs_NPS233-1
Glyma.19G108400	RecName: Full=Aquaporin SIP1-2; AltName: Full=Small basic intrinsic protein 1-2; AltName: Full=ZmSIP1-2; AltName: Full=ZmSIP1;2;	-2.89387	0.000177424	0.0272458	down	NPS301-1_vs_NPS233-1
novel.467	--	3.34436	0.000178615	0.0272458	up	NPS301-1_vs_NPS233-1
Glyma.11G074100	RecName: Full=Cytochrome P450 84A1; EC=1.14.-.-; AltName: Full=Ferulate-5-hydroxylase; Short=F5H;	3.49976	0.000178839	0.0272458	up	NPS301-1_vs_NPS233-1
Glyma.07G236800	RecName: Full=Desiccation-related protein PCC13-62; Flags: Precursor;	-3.8012	0.000179089	0.0272458	down	NPS301-1_vs_NPS233-1
Glyma.10G065200	RecName: Full=Leucine-rich repeat receptor-like protein kinase PXC1 {ECO:0000305}; AltName: Full=Protein PXY/TDR-CORRELATED 1 {ECO:0000303|PubMed:23815750}; Flags: Precursor;	3.39035	0.000182296	0.0276004	up	NPS301-1_vs_NPS233-1
Glyma.14G223700	RecName: Full=Regulator of telomere elongation helicase 1 homolog {ECO:0000305}; EC=3.6.4.12 {ECO:0000305};	-2.5873	0.000183897	0.0277095	down	NPS301-1_vs_NPS233-1
novel.499	RecName: Full=Transmembrane 9 superfamily member 3 {ECO:0000305}; AltName: Full=Endomembrane protein 9 {ECO:0000303|PubMed:22570441}; AltName: Full=Transmembrane nine protein 3 {ECO:0000303|PubMed:20681974}; Short=AtTMN3 {ECO:0000303|PubMed:20681974}; Flags: Precursor;	1.0662	0.000192488	0.0288036	up	NPS301-1_vs_NPS233-1
Glyma.04G236200	RecName: Full=Probable pectinesterase/pectinesterase inhibitor 61; Includes: RecName: Full=Pectinesterase inhibitor 61; AltName: Full=Pectin methylesterase inhibitor 61; Includes: RecName: Full=Pectinesterase 61; Short=PE 61; EC=3.1.1.11; AltName: Full=AtPMEpcrF; AltName: Full=Pectin methylesterase 61; Short=AtPME61;	-1.28497	0.000192987	0.0288036	down	NPS301-1_vs_NPS233-1
Glyma.13G342500	RecName: Full=ETHYLENE INSENSITIVE 3-like 3 protein;	-5.35107	0.000208528	0.0309762	down	NPS301-1_vs_NPS233-1
Glyma.11G236200	RecName: Full=Alanine--glyoxylate aminotransferase 2 homolog 1, mitochondrial; EC=2.6.1.44; AltName: Full=Beta-alanine-pyruvate aminotransferase 1; Flags: Precursor;	-1.83322	0.00021365	0.0315881	down	NPS301-1_vs_NPS233-1
Glyma.14G190900	RecName: Full=Probable anion transporter 4, chloroplastic; AltName: Full=Phosphate transporter PHT4;3; Flags: Precursor;	-2.83901	0.00021858	0.032166	down	NPS301-1_vs_NPS233-1
Glyma.06G272900	RecName: Full=KDEL-tailed cysteine endopeptidase CEP1; EC=3.4.22.-; AltName: Full=Cysteine proteinase CP56; Short=AtCP56; Flags: Precursor;	4.57762	0.000230779	0.0338032	up	NPS301-1_vs_NPS233-1
[truncated: 798 more rows]
