# Supplementary material for: Using transcriptomic and metabolomic data to investigate the molecular mechanisms that determine protein and oil contents during seed development in soybean
Source: Front Plant Sci. 2022 Sep 29;13:1012394. doi: 10.3389/fpls.2022.1012394 (PMC9557928; doi:10.3389/fpls.2022.1012394)
Supplement: Supplementary file 7 [file Table_7.xlsx]

## Sheet: Sheet1
Table S7. Transcripts in different clusters following the K-means analysis.
Gene	Cluster	Chr.	start (bp)	end (bp)	KEGG	KEGG pathway	NR	Swissprot	Tremble	KOG	GO	Pfam
Glyma.01G002000	9	Chr01	285907	288571	--	--	uncharacterized protein LOC100788024 [Glycine max]	RecName: Full=Protein MARD1 {ECO:0000303|PubMed:15159630}; AltName: Full=Mediator of ABA-regulated dormancy1 {ECO:0000303|PubMed:15159630}; AltName: Full=Senescence-associated protein SAG102 {ECO:0000303|PubMed:11402199};	SubName: Full=Uncharacterized protein {ECO:0000313|EMBL:ACU15361.1, ECO:0000313|EnsemblPlants:GLYMA01G00500.1};	--	GO:0010494,cytoplasmic stress granule; GO:0000932,P-body; GO:0046872,metal ion binding; GO:0009737,response to abscisic acid; GO:0010162,seed dormancy process	PF04570.14:zinc-finger of the FCS-type, C2-C2
Glyma.01G002100	10	Chr01	291328	297375	K14486 auxin response factor | (RefSeq) auxin response factor 19-like isoform X1 (A)	ko04075: Plant hormone signal transduction	PREDICTED: auxin response factor 19-like isoform X1 [Glycine max]	RecName: Full=Auxin response factor 5;	RecName: Full=Auxin response factor {ECO:0000256|RuleBase:RU004561};	--	GO:0005634,nucleus; GO:0003677,DNA binding; GO:0009734,auxin-activated signaling pathway; GO:0006355,regulation of transcription, DNA-templated; GO:0006351,transcription, DNA-templated	PF06507.13:Auxin response factor
Glyma.01G002200	9	Chr01	303812	307964	--	--	PREDICTED: methyl-CpG-binding domain-containing protein 2-like [Glycine max]	RecName: Full=Methyl-CpG-binding domain-containing protein 2; Short=AtMBD2; Short=MBD02; AltName: Full=Methyl-CpG-binding protein MBD2;	SubName: Full=Uncharacterized protein {ECO:0000313|EMBL:KRH74147.1, ECO:0000313|EnsemblPlants:GLYMA01G00520.4};	Methyl-CpG binding transcription regulators	GO:0005634,nucleus; GO:0003677,DNA binding; GO:0019899,enzyme binding; GO:0008270,zinc ion binding; GO:0006355,regulation of transcription, DNA-templated; GO:0006351,transcription, DNA-templated	PF07496.15:CW-type Zinc Finger
Glyma.01G003000	10	Chr01	363183	365184	K08869 aarF domain-containing kinase | (RefSeq) predicted protein (A)	--	MYB transcription factor MYB128 [Glycine max]	RecName: Full=Transcription factor MYBS3 {ECO:0000303|PubMed:12172034}; AltName: Full=Myb-related protein S3 {ECO:0000303|PubMed:12172034}; Short=OsMYBS3 {ECO:0000303|PubMed:12172034};	SubName: Full=Uncharacterized protein {ECO:0000313|EMBL:KRH74155.1, ECO:0000313|EnsemblPlants:GLYMA01G00600.1};	--	GO:0005634,nucleus; GO:0003677,DNA binding; GO:0003700,DNA-binding transcription factor activity; GO:0046872,metal ion binding; GO:0045892,negative regulation of transcription, DNA-templated; GO:0009723,response to ethylene; GO:0009739,response to gibberellin; GO:0009744,response to sucrose; GO:0006351,transcription, DNA-templated	PF00249.31:Myb-like DNA-binding domain
Glyma.01G003700	8	Chr01	391477	396784	--	--	hypothetical protein glysoja_037079 [Glycine soja]	--	SubName: Full=Uncharacterized protein {ECO:0000313|EMBL:KHN32908.1};	--	--	--
Glyma.01G004200	1	Chr01	425398	427700	K00588 caffeoyl-CoA O-methyltransferase [EC:2.1.1.104] | (RefSeq) probable caffeoyl-CoA O-methyltransferase At4g26220 (A)	ko00940: Phenylpropanoid biosynthesis; ko00941: Flavonoid biosynthesis; ko00945: Stilbenoid, diarylheptanoid and gingerol biosynthesis	PREDICTED: probable caffeoyl-CoA O-methyltransferase At4g26220 [Glycine max]	RecName: Full=Probable caffeoyl-CoA O-methyltransferase At4g26220; EC=2.1.1.104; AltName: Full=Trans-caffeoyl-CoA 3-O-methyltransferase; Short=CCoAMT; Short=CCoAOMT;	SubName: Full=Putative caffeoyl-CoA O-methyltransferase {ECO:0000313|EMBL:KHN32903.1}; EC=2.1.1.104 {ECO:0000313|EMBL:KHN32903.1};	O-methyltransferase	GO:0005829,cytosol; GO:0042409,caffeoyl-CoA O-methyltransferase activity; GO:0046872,metal ion binding; GO:0009809,lignin biosynthetic process	PF01596.17:O-methyltransferase
Glyma.01G004300	8	Chr01	429326	430538	K02910 large subunit ribosomal protein L31e | (RefSeq) 60S ribosomal protein L31 (A)	ko03010: Ribosome	uncharacterized protein LOC100305583 [Glycine max]	RecName: Full=60S ribosomal protein L31;	SubName: Full=60S ribosomal protein L31 {ECO:0000313|EMBL:KHN32902.1};	60S ribosomal protein L31	GO:0005840,ribosome; GO:0003735,structural constituent of ribosome; GO:0006412,translation	PF01198.19:Ribosomal protein L31e
Glyma.01G004600	6	Chr01	438340	439522	--	--	unknown [Glycine max]	RecName: Full=Arabinogalactan peptide 20; Short=AG-peptide 20; Flags: Precursor;	SubName: Full=Arabinogalactan peptide 20 {ECO:0000313|EMBL:KHN32900.1};	--	GO:0031225,anchored component of membrane; GO:0005886,plasma membrane	PF06376.12:Arabinogalactan peptide
Glyma.01G005000	9	Chr01	464509	466549	K15172 transcription elongation factor SPT5 | (RefSeq) hypothetical protein (A)	--	PREDICTED: zinc finger CCCH domain-containing protein 20 [Glycine max]	RecName: Full=Zinc finger CCCH domain-containing protein 20; Short=AtC3H20;	SubName: Full=Uncharacterized protein {ECO:0000313|EMBL:KRH74187.1, ECO:0000313|EnsemblPlants:GLYMA01G00820.1};	CCCH-type Zn-finger protein	GO:0005886,plasma membrane; GO:0003677,DNA binding; GO:0003700,DNA-binding transcription factor activity; GO:0046872,metal ion binding; GO:0006355,regulation of transcription, DNA-templated; GO:0006979,response to oxidative stress	PF00642.24:Zinc finger C-x8-C-x5-C-x3-H type (and similar)
Glyma.01G005400	10	Chr01	524166	527586	K00850 6-phosphofructokinase 1 [EC:2.7.1.11] | (RefSeq) ATP-dependent 6-phosphofructokinase 3 (A)	ko00010: Glycolysis / Gluconeogenesis; ko00030: Pentose phosphate pathway; ko00051: Fructose and mannose metabolism; ko00052: Galactose metabolism; ko01200: Carbon metabolism; ko01230: Biosynthesis of amino acids; ko03018: RNA degradation	PREDICTED: ATP-dependent 6-phosphofructokinase 3 isoform X1 [Glycine max]	RecName: Full=ATP-dependent 6-phosphofructokinase 3 {ECO:0000255|HAMAP-Rule:MF_03186}; Short=ATP-PFK 3 {ECO:0000255|HAMAP-Rule:MF_03186}; Short=Phosphofructokinase 3 {ECO:0000255|HAMAP-Rule:MF_03186}; EC=2.7.1.11 {ECO:0000255|HAMAP-Rule:MF_03186}; AltName: Full=Phosphohexokinase 3 {ECO:0000255|HAMAP-Rule:MF_03186};	RecName: Full=ATP-dependent 6-phosphofructokinase {ECO:0000256|HAMAP-Rule:MF_03186}; Short=ATP-PFK {ECO:0000256|HAMAP-Rule:MF_03186}; Short=Phosphofructokinase {ECO:0000256|HAMAP-Rule:MF_03186}; EC=2.7.1.11 {ECO:0000256|HAMAP-Rule:MF_03186}; AltName: Full=Phosphohexokinase {ECO:0000256|HAMAP-Rule:MF_03186};	Pyrophosphate-dependent phosphofructo-1-kinase	GO:0005829,cytosol; GO:0003872,6-phosphofructokinase activity; GO:0005524,ATP binding; GO:0046872,metal ion binding; GO:0006002,fructose 6-phosphate metabolic process; GO:0006096,glycolytic process; GO:0010053,root epidermal cell differentiation	PF00365.20:Phosphofructokinase
Glyma.01G006100	5	Chr01	588481	598098	K01887 arginyl-tRNA synthetase [EC:6.1.1.19] | (RefSeq) arginine--tRNA ligase, cytoplasmic-like (A)	ko00970: Aminoacyl-tRNA biosynthesis	PREDICTED: arginine--tRNA ligase, cytoplasmic-like isoform X1 [Glycine max]	RecName: Full=Arginine--tRNA ligase, chloroplastic/mitochondrial {ECO:0000305}; EC=6.1.1.19 {ECO:0000305}; AltName: Full=Arginyl-tRNA synthetase {ECO:0000305}; Short=ArgRS {ECO:0000305}; AltName: Full=Protein EMBRYO DEFECTIVE 1027 {ECO:0000303|PubMed:16297076}; Flags: Precursor;	SubName: Full=Uncharacterized protein {ECO:0000313|EMBL:KRH74209.1, ECO:0000313|EnsemblPlants:GLYMA01G00940.1};	Arginyl-tRNA synthetase	GO:0009507,chloroplast; GO:0009570,chloroplast stroma; GO:0005739,mitochondrion; GO:0004814,arginine-tRNA ligase activity; GO:0005524,ATP binding; GO:0006420,arginyl-tRNA aminoacylation; GO:0009793,embryo development ending in seed dormancy	PF00750.19:tRNA synthetases class I (R)
Glyma.01G010900	5	Chr01	1047531	1051340	--	--	uncharacterized protein LOC100791210 [Glycine max]	--	SubName: Full=Uncharacterized protein {ECO:0000313|EMBL:ACU19601.1, ECO:0000313|EnsemblPlants:GLYMA01G01440.1};	--	--	--
Glyma.01G006200	1	Chr01	599475	602191	--	--	PREDICTED: uncharacterized protein LOC100816703 [Glycine max]	--	SubName: Full=Uncharacterized protein {ECO:0000313|EMBL:KRH74211.1, ECO:0000313|EnsemblPlants:GLYMA01G00950.1};	--	--	--
Glyma.01G006700	8	Chr01	652561	658525	K01301 N-acetylated-alpha-linked acidic dipeptidase [EC:3.4.17.21] | (RefSeq) probable glutamate carboxypeptidase LAMP1 isoform X1 (A)	--	PREDICTED: probable glutamate carboxypeptidase 2 isoform X1 [Glycine max]	RecName: Full=Probable glutamate carboxypeptidase LAMP1 {ECO:0000305}; EC=3.4.17.21 {ECO:0000305}; AltName: Full=Protein LIKE AMP1 {ECO:0000303|PubMed:25673776};	SubName: Full=Uncharacterized protein {ECO:0000313|EnsemblPlants:GLYMA01G01000.1};	Transferrin receptor and related proteins containing the protease-associated (PA) domain	GO:0005783,endoplasmic reticulum; GO:0005789,endoplasmic reticulum membrane; GO:0016021,integral component of membrane; GO:0005773,vacuole; GO:0046872,metal ion binding; GO:0008237,metallopeptidase activity; GO:0010073,meristem maintenance; GO:0007275,multicellular organism development; GO:0040008,regulation of growth	PF04253.15:Transferrin receptor-like dimerisation domain
Glyma.01G007200	3	Chr01	730042	735381	K00844 hexokinase [EC:2.7.1.1] | (RefSeq) hexokinase-1-like (A)	ko00010: Glycolysis / Gluconeogenesis; ko00051: Fructose and mannose metabolism; ko00052: Galactose metabolism; ko00500: Starch and sucrose metabolism; ko00520: Amino sugar and nucleotide sugar metabolism; ko01200: Carbon metabolism	PREDICTED: hexokinase-1-like [Glycine max]	RecName: Full=Hexokinase-1; EC=2.7.1.1; AltName: Full=Protein GLUCOSE INSENSITIVE 2;	RecName: Full=Phosphotransferase {ECO:0000256|RuleBase:RU362007}; EC=2.7.1.- {ECO:0000256|RuleBase:RU362007};	Hexokinase	GO:0005829,cytosol; GO:0016021,integral component of membrane; GO:0016020,membrane; GO:0005741,mitochondrial outer membrane; GO:0005739,mitochondrion; GO:0005634,nucleus; GO:0009536,plastid; GO:0043234,NA; GO:0005774,vacuolar membrane; GO:0005773,vacuole; GO:0005524,ATP binding; GO:0001047,core promoter binding; GO:0008865,fructokinase activity; GO:0004340,glucokinase activity; GO:0005536,glucose…	PF03727.16:Hexokinase
Glyma.01G007800	7	Chr01	763291	771911	K00558 DNA (cytosine-5)-methyltransferase 1 [EC:2.1.1.37] | (RefSeq) DNA (cytosine-5)-methyltransferase CMT3-like (A)	ko00270: Cysteine and methionine metabolism	PREDICTED: DNA (cytosine-5)-methyltransferase CMT3 [Glycine max]	RecName: Full=DNA (cytosine-5)-methyltransferase CMT3; EC=2.1.1.37; AltName: Full=Chromomethylase 3; AltName: Full=Protein CHROMOMETHYLASE 3;	RecName: Full=Cytosine-specific methyltransferase {ECO:0000256|RuleBase:RU000417}; EC=2.1.1.37 {ECO:0000256|RuleBase:RU000417};	--	GO:0005634,nucleus; GO:0003682,chromatin binding; GO:0003886,DNA (cytosine-5-)-methyltransferase activity; GO:0003677,DNA binding; GO:0006342,chromatin silencing; GO:0006306,DNA methylation; GO:0010425,DNA methylation on cytosine within a CNG sequence; GO:0051567,histone H3-K9 methylation; GO:0045814,negative regulation of gene expression, epigenetic; GO:0006351,transcription, DNA-templated; GO:0…	PF00145.17:C-5 cytosine-specific DNA methylase
Glyma.01G008000	8	Chr01	779555	783740	K23490 cytochrome b5 | (RefSeq) cytochrome b5 (A)	--	PREDICTED: cytochrome B5-like protein [Glycine max]	RecName: Full=Cytochrome B5-like protein {ECO:0000303|PubMed:19054355}; Short=AtCb5LP {ECO:0000303|PubMed:19054355}; AltName: Full=Cytochrome b5 isoform F {ECO:0000303|PubMed:22384013}; Short=AtCb5-F {ECO:0000303|PubMed:22384013};	SubName: Full=Uncharacterized protein {ECO:0000313|EMBL:KRH74256.1, ECO:0000313|EnsemblPlants:GLYMA01G01140.1};	Cytochrome b5	GO:0016021,integral component of membrane; GO:0020037,heme binding; GO:0046872,metal ion binding	PF00173.28:Cytochrome b5-like Heme/Steroid binding domain
Glyma.01G008500	9	Chr01	827132	832098	K00029 malate dehydrogenase (oxaloacetate-decarboxylating)(NADP+) [EC:1.1.1.40] | (RefSeq) NADP-dependent malic enzyme-like (A)	ko00620: Pyruvate metabolism; ko00710: Carbon fixation in photosynthetic organisms; ko01200: Carbon metabolism	PREDICTED: NADP-dependent malic enzyme-like [Glycine max]	RecName: Full=NADP-dependent malic enzyme; Short=NADP-ME; EC=1.1.1.40;	RecName: Full=Malic enzyme {ECO:0000256|RuleBase:RU003426};	NADP+-dependent malic enzyme	GO:0005737,cytoplasm; GO:0004471,malate dehydrogenase (decarboxylating) (NAD+) activity; GO:0004473,malate dehydrogenase (decarboxylating) (NADP+) activity; GO:0046872,metal ion binding; GO:0051287,NAD binding; GO:0008948,oxaloacetate decarboxylase activity; GO:0006108,malate metabolic process; GO:0051260,protein homooligomerization	PF03949.15:Malic enzyme, NAD binding domain
Glyma.01G009200	9	Chr01	901695	903187	--	--	PREDICTED: lachrymatory-factor synthase-like [Glycine max]	RecName: Full=Lachrymatory-factor synthase; Flags: Precursor;	SubName: Full=Uncharacterized protein {ECO:0000313|EMBL:KRH74275.1, ECO:0000313|EnsemblPlants:GLYMA01G01260.1};	--	GO:0005773,vacuole	PF10604.9:Polyketide cyclase / dehydrase and lipid transport
Glyma.01G009300	8	Chr01	908484	917161	K07151 dolichyl-diphosphooligosaccharide---protein glycosyltransferase [EC:2.4.99.18] | (RefSeq) dolichyl-diphosphooligosaccharide--protein glycosyltransferase subunit STT3A-like (A)	ko00510: N-Glycan biosynthesis; ko00513: Various types of N-glycan biosynthesis; ko04141: Protein processing in endoplasmic reticulum	PREDICTED: dolichyl-diphosphooligosaccharide--protein glycosyltransferase subunit STT3A-like [Glycine max]	RecName: Full=Dolichyl-diphosphooligosaccharide--protein glycosyltransferase subunit STT3A; Short=Oligosaccharyl transferase subunit STT3A; Short=STT3-A; EC=2.4.99.18; AltName: Full=Integral membrane protein 1; AltName: Full=Protein STAUROSPORIN AND TEMPERATURE SENSITIVE 3-LIKE A;	SubName: Full=Uncharacterized protein {ECO:0000313|EMBL:KRH74276.1, ECO:0000313|EnsemblPlants:GLYMA01G01270.1};	Oligosaccharyltransferase, STT3 subunit	GO:0005783,endoplasmic reticulum; GO:0016021,integral component of membrane; GO:0016020,membrane; GO:0008250,oligosaccharyltransferase complex; GO:0005886,plasma membrane; GO:0004579,dolichyl-diphosphooligosaccharide-protein glycotransferase activity; GO:0043687,post-translational protein modification; GO:0018279,protein N-linked glycosylation via asparagine; GO:0047484,regulation of response to …	PF02516.14:Oligosaccharyl transferase STT3 subunit
Glyma.01G019100	5	Chr01	1826798	1836353	K00703 starch synthase [EC:2.4.1.21] | (RefSeq) probable starch synthase 4, chloroplastic/amyloplastic isoform X1 (A)	ko00500: Starch and sucrose metabolism	PREDICTED: probable starch synthase 4, chloroplastic/amyloplastic isoform X1 [Glycine max]	RecName: Full=Probable starch synthase 4, chloroplastic/amyloplastic {ECO:0000305}; Short=AtSS4 {ECO:0000303|PubMed:17217470}; EC=2.4.1.21 {ECO:0000269|PubMed:19666739}; AltName: Full=Soluble starch synthase IV {ECO:0000303|PubMed:17217470}; Short=SSIV {ECO:0000303|PubMed:17217470}; Flags: Precursor;	SubName: Full=Uncharacterized protein {ECO:0000313|EMBL:KRH74428.1, ECO:0000313|EnsemblPlants:GLYMA01G02321.1};	--	GO:0009501,amyloplast; GO:0009507,chloroplast; GO:0033201,alpha-1,4-glucan synthase activity; GO:0004373,glycogen (starch) synthase activity; GO:0009011,starch synthase activity; GO:0019252,starch biosynthetic process; GO:0005982,starch metabolic process	PF08323.11:Starch synthase catalytic domain
Glyma.01G009500	9	Chr01	934715	936944	K21568 pinoresinol/lariciresinol reductase [EC:1.23.1.1 1.23.1.2 1.23.1.3 1.23.1.4] | (RefSeq) isoflavone reductase homolog-like (A)	ko00998: Biosynthesis of various secondary metabolites - part 2	hypothetical protein GLYMA_01G009500 [Glycine max]	RecName: Full=Isoflavone reductase homolog; EC=1.3.1.-;	SubName: Full=Uncharacterized protein {ECO:0000313|EMBL:KRH74279.1, ECO:0000313|EnsemblPlants:GLYMA01G01291.1};	--	GO:0016491,oxidoreductase activity	PF05368.13:NmrA-like family
Glyma.01G019200	5	Chr01	1839153	1846859	K01610 phosphoenolpyruvate carboxykinase (ATP) [EC:4.1.1.49] | (RefSeq) phosphoenolpyruvate carboxykinase [ATP]-like (A)	ko00010: Glycolysis / Gluconeogenesis; ko00020: Citrate cycle (TCA cycle); ko00620: Pyruvate metabolism; ko00710: Carbon fixation in photosynthetic organisms; ko01200: Carbon metabolism	PREDICTED: phosphoenolpyruvate carboxykinase [ATP]	RecName: Full=Phosphoenolpyruvate carboxykinase (ATP); Short=PEP carboxykinase; Short=PEPCK; EC=4.1.1.49;	SubName: Full=Uncharacterized protein {ECO:0000313|EMBL:KRH74430.1, ECO:0000313|EnsemblPlants:GLYMA01G02330.1};	--	GO:0005829,cytosol; GO:0016020,membrane; GO:0005730,nucleolus; GO:0005634,nucleus; GO:0005524,ATP binding; GO:0004612,phosphoenolpyruvate carboxykinase (ATP) activity; GO:0016036,cellular response to phosphate starvation; GO:0009817,defense response to fungus, incompatible interaction; GO:0006094,gluconeogenesis; GO:0046686,response to cadmium ion	PF01293.20:Phosphoenolpyruvate carboxykinase
Glyma.01G009700	6	Chr01	952611	956924	--	--	PREDICTED: uncharacterized protein LOC100812276 [Glycine max]	--	SubName: Full=Uncharacterized protein {ECO:0000313|EMBL:KRH74281.1, ECO:0000313|EnsemblPlants:GLYMA01G01310.1};	--	GO:0016021,integral component of membrane	--
Glyma.01G043400	5	Chr01	4728360	4732303	--	--	PREDICTED: SNF1-related protein kinase regulatory subunit gamma-1-like [Glycine max]	RecName: Full=SNF1-related protein kinase regulatory subunit gamma-1-like; AltName: Full=AKIN subunit gamma-1-like; AltName: Full=CBS domain-containing protein CBSCBS2;	SubName: Full=Uncharacterized protein {ECO:0000313|EMBL:KRH74793.1, ECO:0000313|EnsemblPlants:GLYMA01G05060.3};	5'-AMP-activated protein kinase, gamma subunit	GO:0005975,carbohydrate metabolic process	PF00571.28:CBS domain
Glyma.01G058300	5	Chr01	7673838	7676281	K19891 glucan endo-1,3-beta-glucosidase 1/2/3 [EC:3.2.1.39] | (RefSeq) glucan endo-1,3-beta-glucosidase 1-like isoform X1 (A)	ko00500: Starch and sucrose metabolism	PREDICTED: PLASMODESMATA CALLOSE-BINDING PROTEIN 4 [Glycine max]	RecName: Full=PLASMODESMATA CALLOSE-BINDING PROTEIN 3; Short=AtPDCB3; Flags: Precursor;	SubName: Full=Uncharacterized protein {ECO:0000313|EMBL:ACU14053.1, ECO:0000313|EnsemblPlants:GLYMA01G07100.1}; Flags: Fragment;	--	GO:0031225,anchored component of membrane; GO:0046658,anchored component of plasma membrane; GO:0009506,plasmodesma; GO:0001872,(1->3)-beta-D-glucan binding; GO:0004553,hydrolase activity, hydrolyzing O-glycosyl compounds; GO:0030247,polysaccharide binding	PF07983.13:X8 domain
Glyma.01G011000	2	Chr01	1053128	1053792	--	--	hypothetical protein glysoja_000911 [Glycine soja]	--	SubName: Full=Uncharacterized protein {ECO:0000313|EMBL:KRH74299.1, ECO:0000313|EnsemblPlants:GLYMA01G01450.1};	--	--	--
Glyma.01G011900	10	Chr01	1140332	1146805	K20890 xylan alpha-glucuronosyltransferase [EC:2.4.1.-] | (RefSeq) UDP-glucuronate:xylan alpha-glucuronosyltransferase 1-like (A)	--	PREDICTED: uncharacterized protein LOC100808539 [Glycine max]	RecName: Full=Ankyrin repeat-containing protein NPR4 {ECO:0000305}; Short=OsNPR4 {ECO:0000303|PubMed:17309686};	SubName: Full=Uncharacterized protein {ECO:0000313|EMBL:KRH74311.1, ECO:0000313|EnsemblPlants:GLYMA01G01550.1};	FOG: Ankyrin repeat	GO:0016021,integral component of membrane; GO:0005886,plasma membrane	PF13962.6:Domain of unknown function
Glyma.01G012100	2	Chr01	1162070	1167484	K13806 sn1-specific diacylglycerol lipase [EC:3.1.1.-] | (RefSeq) uncharacterized LOC100810158 (A)	--	PREDICTED: uncharacterized protein LOC100807640 isoform X1 [Glycine max]	--	SubName: Full=Uncharacterized protein {ECO:0000313|EMBL:KRH74313.1, ECO:0000313|EnsemblPlants:GLYMA01G01570.1};	Predicted lipase/calmodulin-binding heat-shock protein	GO:0016787,hydrolase activity; GO:0006629,lipid metabolic process	PF01764.25:Lipase (class 3)
Glyma.01G013500	9	Chr01	1284193	1292972	K06883 uncharacterized protein | (RefSeq) LOW QUALITY PROTEIN: uncharacterized protein LOC104799061 (A)	--	PREDICTED: putative receptor-like protein kinase At4g00960 [Glycine max]	RecName: Full=Cysteine-rich receptor-like protein kinase 8; Short=Cysteine-rich RLK8; EC=2.7.11.-; Flags: Precursor;	SubName: Full=Uncharacterized protein {ECO:0000313|EMBL:KRH74328.1, ECO:0000313|EnsemblPlants:GLYMA01G01730.2};	--	GO:0016021,integral component of membrane; GO:0005886,plasma membrane; GO:0005524,ATP binding; GO:0004674,protein serine/threonine kinase activity; GO:0042742,defense response to bacterium; GO:0006468,protein phosphorylation	PF07714.17:Protein tyrosine kinase
Glyma.01G013900	1	Chr01	1327885	1331315	K08235 xyloglucan:xyloglucosyl transferase [EC:2.4.1.207] | (RefSeq) probable xyloglucan endotransglucosylase/hydrolase protein 30 (A)	--	PREDICTED: probable xyloglucan endotransglucosylase/hydrolase protein 30 [Glycine max]	RecName: Full=Probable xyloglucan endotransglucosylase/hydrolase protein 30; Short=At-XTH30; Short=XTH-30; EC=2.4.1.207; Flags: Precursor;	RecName: Full=Xyloglucan endotransglucosylase/hydrolase {ECO:0000256|RuleBase:RU361120}; EC=2.4.1.207 {ECO:0000256|RuleBase:RU361120};	--	GO:0048046,apoplast; GO:0005618,cell wall; GO:0004553,hydrolase activity, hydrolyzing O-glycosyl compounds; GO:0016762,xyloglucan:xyloglucosyl transferase activity; GO:0042546,cell wall biogenesis; GO:0071555,cell wall organization; GO:0010411,xyloglucan metabolic process	PF00722.21:Glycosyl hydrolases family 16
Glyma.01G014400	8	Chr01	1389107	1393444	K04708 3-dehydrosphinganine reductase [EC:1.1.1.102] | (GenBank) transmembrane protein, putative (A)	ko00600: Sphingolipid metabolism	hypothetical protein GLYMA_01G014400 [Glycine max]	RecName: Full=Uncharacterized protein At1g32220, chloroplastic; Flags: Precursor;	SubName: Full=Uncharacterized protein {ECO:0000313|EMBL:KRH74352.1, ECO:0000313|EnsemblPlants:GLYMA01G01830.1};	Predicted oxidoreductase	GO:0009507,chloroplast; GO:0010287,plastoglobule; GO:0009579,thylakoid; GO:0003954,NADH dehydrogenase activity; GO:0006979,response to oxidative stress; GO:1901006,ubiquinone-6 biosynthetic process	PF13460.6:NAD(P)H-binding
Glyma.01G014600	8	Chr01	1404289	1411222	K09338 homeobox-leucine zipper protein | (RefSeq) homeobox-leucine zipper protein HDG11-like (A)	--	hypothetical protein GLYMA_01G014600 [Glycine max]	RecName: Full=Homeobox-leucine zipper protein ROC3; AltName: Full=GLABRA 2-like homeobox protein 3; AltName: Full=HD-ZIP protein ROC3; AltName: Full=Homeodomain transcription factor ROC3; AltName: Full=Protein RICE OUTERMOST CELL-SPECIFIC 3;	SubName: Full=Uncharacterized protein {ECO:0000313|EMBL:KRH74357.1, ECO:0000313|EnsemblPlants:GLYMA01G01850.1};	--	GO:0005634,nucleus; GO:0008289,lipid binding; GO:0043565,sequence-specific DNA binding; GO:0006355,regulation of transcription, DNA-templated; GO:0006351,transcription, DNA-templated	PF01852.19:START domain
Glyma.01G015000	1	Chr01	1485325	1491704	--	--	PREDICTED: inactive poly [ADP-ribose]	RecName: Full=Inactive poly [ADP-ribose] polymerase RCD1; AltName: Full=Protein RADICAL-INDUCED CELL DEATH 1;	SubName: Full=Radical-induced cell death protein {ECO:0000313|EMBL:ACJ61470.1};	--	GO:0005737,cytoplasm; GO:0016363,nuclear matrix; GO:0005634,nucleus; GO:0003950,NAD+ ADP-ribosyltransferase activity; GO:0009816,defense response to bacterium, incompatible interaction; GO:0009793,embryo development ending in seed dormancy; GO:0009873,ethylene-activated signaling pathway; GO:0009867,jasmonic acid mediated signaling pathway; GO:0010102,lateral root morphogenesis; GO:0006809,nitric…	PF12174.8:RCD1-SRO-TAF4 (RST) plant domain
Glyma.01G067300	5	Chr01	10970241	10973414	K03006 DNA-directed RNA polymerase II subunit RPB1 [EC:2.7.7.6] | (RefSeq) DNA-directed RNA polymerase II subunit 1-like (A)	ko03020: RNA polymerase	hypothetical protein GLYMA_01G067300 [Glycine max]	RecName: Full=DNA-directed RNA polymerase II subunit 1; AltName: Full=DNA-directed RNA polymerase II subunit RPB1; Short=DNA polymerase II subunit B1; EC=2.7.7.6; AltName: Full=DNA-directed RNA polymerase III largest subunit;	SubName: Full=Uncharacterized protein {ECO:0000313|EMBL:KRH75173.1};	RNA polymerase II, large subunit	GO:0009507,chloroplast; GO:0005665,RNA polymerase II, core complex; GO:0009506,plasmodesma; GO:0005773,vacuole; GO:0003677,DNA binding; GO:0003899,DNA-directed 5'-3' RNA polymerase activity; GO:0046872,metal ion binding; GO:0006366,transcription by RNA polymerase II	PF04997.12:RNA polymerase Rpb1, domain 1
Glyma.01G016500	6	Chr01	1573790	1583422	K05658 ATP-binding cassette, subfamily B (MDR/TAP), member 1 [EC:3.6.3.44] | (RefSeq) ABC transporter B family member 2-like (A)	ko02010: ABC transporters	PREDICTED: ABC transporter B family member 2-like [Glycine max]	RecName: Full=ABC transporter B family member 2; Short=ABC transporter ABCB.2; Short=AtABCB2; AltName: Full=Multidrug resistance protein 2; AltName: Full=P-glycoprotein 2; Flags: Precursor;	SubName: Full=Uncharacterized protein {ECO:0000313|EMBL:KRH74394.1, ECO:0000313|EnsemblPlants:GLYMA01G02060.1};	Multidrug/pheromone exporter, ABC superfamily	GO:0016021,integral component of membrane; GO:0016020,membrane; GO:0005524,ATP binding; GO:0042626,ATPase activity, coupled to transmembrane movement of substances	PF00664.23:ABC transporter transmembrane region
Glyma.01G095000	5	Chr01	29302459	29303779	--	--	kunitz-type trypsin inhibitor KTI1 precursor [Glycine max]	RecName: Full=Kunitz-type trypsin inhibitor KTI1; Flags: Precursor;	SubName: Full=Uncharacterized protein {ECO:0000313|EMBL:ACU13737.1, ECO:0000313|EnsemblPlants:GLYMA01G10900.1};	--	GO:0004867,serine-type endopeptidase inhibitor activity	PF00197.18:Trypsin and protease inhibitor
Glyma.01G017000	10	Chr01	1622886	1624365	--	--	hypothetical protein GLYMA_01G017000 [Glycine max]	--	SubName: Full=Uncharacterized protein {ECO:0000313|EMBL:KRH74400.1, ECO:0000313|EnsemblPlants:GLYMA01G02110.2};	--	--	PF13431.6:Tetratricopeptide repeat
Glyma.01G017100	2	Chr01	1634013	1637492	K09753 cinnamoyl-CoA reductase [EC:1.2.1.44] | (RefSeq) cinnamoyl-CoA reductase 1-like (A)	ko00940: Phenylpropanoid biosynthesis	PREDICTED: cinnamoyl-CoA reductase 2-like [Glycine max]	RecName: Full=Cinnamoyl-CoA reductase-like SNL6 {ECO:0000305}; EC=1.2.-.- {ECO:0000305}; AltName: Full=Protein SUPPRESSOR OF NH1-MEDIATED LESION 6 {ECO:0000303|PubMed:20862311};	SubName: Full=Bifunctional dihydroflavonol 4-reductase/flavanone 4-reductase {ECO:0000313|EMBL:KHN04871.1}; EC=1.2.1.44 {ECO:0000313|EMBL:KHN04871.1};	Flavonol reductase/cinnamoyl-CoA reductase	GO:0003854,3-beta-hydroxy-delta5-steroid dehydrogenase activity; GO:0042742,defense response to bacterium; GO:0009809,lignin biosynthetic process; GO:0006694,steroid biosynthetic process	PF01073.19:3-beta hydroxysteroid dehydrogenase/isomerase family
Glyma.01G017700	2	Chr01	1689030	1691957	--	--	uncharacterized protein LOC100797900 [Glycine max]	--	SubName: Full=Uncharacterized protein {ECO:0000313|EMBL:KHN04876.1};	--	--	PF04640.14:PLATZ transcription factor
Glyma.01G109500	5	Chr01	37329078	37330095	--	--	SOUL heme-binding domain-containing protein [Glycine max]	RecName: Full=Heme-binding-like protein At3g10130, chloroplastic; Flags: Precursor;	SubName: Full=Uncharacterized protein {ECO:0000313|EMBL:KRH75788.1, ECO:0000313|EnsemblPlants:GLYMA01G26970.1};	--	GO:0009507,chloroplast; GO:0009535,chloroplast thylakoid membrane; GO:0010287,plastoglobule	PF04832.12:SOUL heme-binding protein
Glyma.01G018000	4	Chr01	1736217	1737384	K09874 aquaporin NIP | (RefSeq) aquaporin NIP1-1-like (A)	--	unknown [Glycine max]	--	SubName: Full=Uncharacterized protein {ECO:0000313|EMBL:ACU13888.1};	--	--	--
Glyma.01G018100	10	Chr01	1745243	1746141	--	--	hypothetical protein GLYMA_01G018100 [Glycine max]	--	SubName: Full=Uncharacterized protein {ECO:0000313|EMBL:KRH74415.1};	--	--	--
Glyma.01G018300	7	Chr01	1750027	1754223	K11855 ubiquitin carboxyl-terminal hydrolase 36/42 [EC:3.4.19.12] | (RefSeq) ubiquitin carboxyl-terminal hydrolase 20-like (A)	--	PREDICTED: ubiquitin carboxyl-terminal hydrolase 20-like [Glycine max]	RecName: Full=Ubiquitin carboxyl-terminal hydrolase 20; EC=3.4.19.12; AltName: Full=Deubiquitinating enzyme 20; Short=AtUBP20; AltName: Full=Ubiquitin thioesterase 20; AltName: Full=Ubiquitin-specific-processing protease 20;	SubName: Full=Uncharacterized protein {ECO:0000313|EMBL:KRH74417.1, ECO:0000313|EnsemblPlants:GLYMA01G02240.1};	Ubiquitin carboxyl-terminal hydrolase	GO:0036459,thiol-dependent ubiquitinyl hydrolase activity; GO:0016579,protein deubiquitination; GO:0006511,ubiquitin-dependent protein catabolic process	PF00443.29:Ubiquitin carboxyl-terminal hydrolase
Glyma.01G018600	8	Chr01	1783917	1787262	--	--	PREDICTED: uncharacterized protein LOC100817619 [Glycine max]	--	SubName: Full=Uncharacterized protein {ECO:0000313|EMBL:KRH74420.1, ECO:0000313|EnsemblPlants:GLYMA01G02270.2};	--	--	--
Glyma.01G019000	8	Chr01	1818232	1821908	K15109 solute carrier family 25 (mitochondrial carnitine/acylcarnitine transporter), member 20/29 | (RefSeq) mitochondrial carnitine/acylcarnitine carrier-like protein (A)	--	hypothetical protein GLYMA_01G019000 [Glycine max]	RecName: Full=Mitochondrial carnitine/acylcarnitine carrier-like protein; AltName: Full=Carnitine/acylcarnitine translocase-like protein; Short=CAC-like protein; AltName: Full=Protein A BOUT DE SOUFFLE;	SubName: Full=Uncharacterized protein {ECO:0000313|EMBL:KRH74426.1, ECO:0000313|EnsemblPlants:GLYMA01G02300.1};	Mitochondrial carnitine-acylcarnitine carrier protein	GO:0009507,chloroplast; GO:0016021,integral component of membrane; GO:0005743,mitochondrial inner membrane; GO:0005739,mitochondrion; GO:0009536,plastid; GO:0000064,L-ornithine transmembrane transporter activity; GO:0000066,NA; GO:0006839,mitochondrial transport	PF00153.27:Mitochondrial carrier protein
Glyma.01G123100	5	Chr01	42339392	42341084	--	--	PREDICTED: UPF0098 protein TC_0109-like [Glycine max]	--	SubName: Full=Uncharacterized protein {ECO:0000313|EMBL:KRH75992.1, ECO:0000313|EnsemblPlants:GLYMA01G30670.1};	--	--	PF01161.20:Phosphatidylethanolamine-binding protein
Glyma.01G124500	5	Chr01	42969804	42973300	K00522 ferritin heavy chain [EC:1.16.3.2] | (RefSeq) ferritin-2, chloroplastic (A)	--	ferritin-2, chloroplastic [Glycine max]	RecName: Full=Ferritin-2, chloroplastic; EC=1.16.3.1; AltName: Full=SFerH-2; Flags: Precursor;	RecName: Full=Ferritin {ECO:0000256|RuleBase:RU361145}; EC=1.16.3.1 {ECO:0000256|RuleBase:RU361145};	Ferritin	GO:0009507,chloroplast; GO:0005737,cytoplasm; GO:0008199,ferric iron binding; GO:0004322,ferroxidase activity; GO:0005506,iron ion binding; GO:0006880,intracellular sequestering of iron ion; GO:0006826,iron ion transport	PF00210.24:Ferritin-like domain
Glyma.01G131100	5	Chr01	44695014	44698838	K14455 aspartate aminotransferase, mitochondrial [EC:2.6.1.1] | (RefSeq) aspartate aminotransferase, mitochondrial-like (A)	ko00220: Arginine biosynthesis; ko00250: Alanine, aspartate and glutamate metabolism; ko00270: Cysteine and methionine metabolism; ko00330: Arginine and proline metabolism; ko00350: Tyrosine metabolism; ko00360: Phenylalanine metabolism; ko00400: Phenylalanine, tyrosine and tryptophan biosynthesis; ko00710: Carbon fixation in photosynthetic organisms; ko00950: Isoquinoline alkaloid biosynthesis; …	PREDICTED: aspartate aminotransferase, mitochondrial-like [Glycine max]	RecName: Full=Aspartate aminotransferase, mitochondrial; EC=2.6.1.1; AltName: Full=Transaminase A; Flags: Precursor;	SubName: Full=Aspartate aminotransferase, mitochondrial {ECO:0000313|EMBL:KHN44817.1}; EC=2.6.1.1 {ECO:0000313|EMBL:KHN44817.1};	Aspartate aminotransferase/Glutamic oxaloacetic transaminase AAT1/GOT2	GO:0005759,mitochondrial matrix; GO:0005739,mitochondrion; GO:0005507,copper ion binding; GO:0004069,L-aspartate:2-oxoglutarate aminotransferase activity; GO:0080130,L-phenylalanine:2-oxoglutarate aminotransferase activity; GO:0030170,pyridoxal phosphate binding; GO:0006103,2-oxoglutarate metabolic process; GO:0006531,aspartate metabolic process; GO:0009058,biosynthetic process; GO:0006536,glutam…	PF00155.21:Aminotransferase class I and II
Glyma.01G019400	6	Chr01	1886628	1890669	K14484 auxin-responsive protein IAA | (RefSeq) GH1; auxin-responsive protein IAA8 (A)	ko04075: Plant hormone signal transduction	PREDICTED: auxin-responsive protein IAA8 [Glycine max]	RecName: Full=Auxin-responsive protein IAA8; AltName: Full=Indoleacetic acid-induced protein 8;	RecName: Full=Auxin-induced protein {ECO:0000256|RuleBase:RU004549};	--	GO:0005634,nucleus; GO:0009734,auxin-activated signaling pathway; GO:1901332,negative regulation of lateral root development; GO:0006355,regulation of transcription, DNA-templated; GO:0006351,transcription, DNA-templated	PF02309.16:AUX/IAA family
Glyma.01G019500	2	Chr01	1905829	1906826	--	--	PREDICTED: uncharacterized protein At5g65660-like [Glycine max]	RecName: Full=Uncharacterized protein At5g65660;	SubName: Full=Uncharacterized protein {ECO:0000313|EMBL:KRH74436.1, ECO:0000313|EnsemblPlants:GLYMA01G02360.1};	--	GO:0016021,integral component of membrane; GO:0005886,plasma membrane	--
Glyma.01G019700	6	Chr01	1941089	1943002	K13422 transcription factor MYC2 | (RefSeq) transcription factor MYC2-like (A)	ko04016: MAPK signaling pathway - plant; ko04075: Plant hormone signal transduction	PREDICTED: transcription factor bHLH93-like isoform X1 [Glycine max]	RecName: Full=Transcription factor bHLH93; AltName: Full=Basic helix-loop-helix protein 93; Short=AtbHLH93; Short=bHLH 93; AltName: Full=Transcription factor EN 47; AltName: Full=bHLH transcription factor bHLH093;	SubName: Full=BHLH transcription factor {ECO:0000313|EMBL:ALA09121.1};	--	GO:0005634,nucleus; GO:0003677,DNA binding; GO:0003700,DNA-binding transcription factor activity; GO:0046983,protein dimerization activity; GO:0045487,gibberellin catabolic process; GO:0007275,multicellular organism development; GO:0010371,regulation of gibberellin biosynthetic process; GO:0006351,transcription, DNA-templated	PF00010.26:Helix-loop-helix DNA-binding domain
Glyma.01G141900	5	Chr01	47401227	47414434	K15198 transcription factor TFIIIB component B'' | (RefSeq) uncharacterized protein LOC8069083 isoform X1 (A)	--	PREDICTED: uncharacterized protein LOC100794365 isoform X1 [Glycine max]	--	SubName: Full=Uncharacterized protein {ECO:0000313|EMBL:KRH76252.1};	--	--	PF10248.9:Myelodysplasia-myeloid leukemia factor 1-interacting protein
Glyma.01G020900	3	Chr01	2104937	2109784	K00083 cinnamyl-alcohol dehydrogenase [EC:1.1.1.195] | (RefSeq) mannitol dehydrogenase-like (A)	ko00940: Phenylpropanoid biosynthesis	uncharacterized protein LOC100809071 [Glycine max]	RecName: Full=Probable mannitol dehydrogenase; EC=1.1.1.255; AltName: Full=NAD-dependent mannitol dehydrogenase;	SubName: Full=Putative mannitol dehydrogenase {ECO:0000313|EMBL:KHN04904.1}; EC=1.1.1.195 {ECO:0000313|EMBL:KHN04904.1};	Alcohol dehydrogenase, class V	GO:0046029,mannitol dehydrogenase activity; GO:0008270,zinc ion binding	PF08240.12:Alcohol dehydrogenase GroES-like domain
Glyma.01G021000	4	Chr01	2122589	2125447	K00083 cinnamyl-alcohol dehydrogenase [EC:1.1.1.195] | (RefSeq) mannitol dehydrogenase-like (A)	ko00940: Phenylpropanoid biosynthesis	PREDICTED: probable mannitol dehydrogenase [Glycine max]	RecName: Full=Probable mannitol dehydrogenase; EC=1.1.1.255; AltName: Full=NAD-dependent mannitol dehydrogenase;	SubName: Full=Uncharacterized protein {ECO:0000313|EMBL:KRH74457.1, ECO:0000313|EnsemblPlants:GLYMA01G02580.1};	Alcohol dehydrogenase, class V	GO:0046029,mannitol dehydrogenase activity; GO:0008270,zinc ion binding	PF08240.12:Alcohol dehydrogenase GroES-like domain
Glyma.01G022500	8	Chr01	2246170	2251398	K09285 AP2-like factor, ANT lineage | (RefSeq) AP2-like ethylene-responsive transcription factor AIL6 (A)	--	PREDICTED: AP2-like ethylene-responsive transcription factor AIL6 [Glycine max]	RecName: Full=AP2-like ethylene-responsive transcription factor AIL6; AltName: Full=Protein AINTEGUMENTA-LIKE 6;	SubName: Full=Uncharacterized protein {ECO:0000313|EMBL:KRH74476.1, ECO:0000313|EnsemblPlants:GLYMA01G02760.1};	--	GO:0005634,nucleus; GO:0003677,DNA binding; GO:0003700,DNA-binding transcription factor activity; GO:0009873,ethylene-activated signaling pathway; GO:0007275,multicellular organism development; GO:0006351,transcription, DNA-templated	PF00847.20:AP2 domain
Glyma.01G022700	6	Chr01	2287485	2293185	K14611 solute carrier family 23 (nucleobase transporter), member 1 | (RefSeq) nucleobase-ascorbate transporter 11-like (A)	--	PREDICTED: nucleobase-ascorbate transporter 11-like [Glycine max]	RecName: Full=Nucleobase-ascorbate transporter 11; Short=AtNAT11;	SubName: Full=Uncharacterized protein {ECO:0000313|EMBL:KRH74478.1, ECO:0000313|EnsemblPlants:GLYMA01G02790.1};	Xanthine/uracil transporters	GO:0016021,integral component of membrane; GO:0005886,plasma membrane; GO:0022857,transmembrane transporter activity	PF00860.20:Permease family
Glyma.01G148900	5	Chr01	48592715	48600024	--	--	PREDICTED: protein BREVIS RADIX-like isoform X1 [Glycine max]	RecName: Full=Protein BREVIS RADIX; Short=AtBRX;	SubName: Full=Uncharacterized protein {ECO:0000313|EMBL:KRH76371.1, ECO:0000313|EnsemblPlants:GLYMA01G35180.2};	--	GO:0005634,nucleus; GO:0005886,plasma membrane; GO:0009734,auxin-activated signaling pathway; GO:0009736,cytokinin-activated signaling pathway; GO:0048527,lateral root development; GO:0009737,response to abscisic acid; GO:0048364,root development	PF08381.11:Transcription factor regulating root and shoot growth via Pin3
Glyma.01G152500	5	Chr01	48952458	48957862	--	--	PREDICTED: uncharacterized protein LOC100819752 isoform X1 [Glycine max]	--	SubName: Full=Uncharacterized protein {ECO:0000313|EMBL:KRH76443.1};	--	GO:0016021,integral component of membrane	PF07795.11:Protein of unknown function (DUF1635)
Glyma.01G023900	8	Chr01	2433777	2442737	K11855 ubiquitin carboxyl-terminal hydrolase 36/42 [EC:3.4.19.12] | (RefSeq) ubiquitin carboxyl-terminal hydrolase 17-like (A)	--	PREDICTED: ubiquitin carboxyl-terminal hydrolase 17-like [Glycine max]	RecName: Full=Ubiquitin carboxyl-terminal hydrolase 17; EC=3.4.19.12; AltName: Full=Deubiquitinating enzyme 17; Short=AtUBP17; AltName: Full=Ubiquitin thioesterase 17; AltName: Full=Ubiquitin-specific-processing protease 17;	SubName: Full=Uncharacterized protein {ECO:0000313|EMBL:KRH74502.1, ECO:0000313|EnsemblPlants:GLYMA01G02941.1};	Ubiquitin carboxyl-terminal hydrolase	GO:0046872,metal ion binding; GO:0036459,thiol-dependent ubiquitinyl hydrolase activity; GO:0016579,protein deubiquitination; GO:0006511,ubiquitin-dependent protein catabolic process	PF00443.29:Ubiquitin carboxyl-terminal hydrolase
Glyma.01G153200	5	Chr01	49031976	49040525	K12400 AP-4 complex subunit epsilon-1 | (RefSeq) AP-4 complex subunit epsilon-like (A)	--	PREDICTED: AP-4 complex subunit epsilon-like [Glycine max]	RecName: Full=AP-4 complex subunit epsilon; AltName: Full=AP-4 adaptor complex subunit epsilon; AltName: Full=Adaptor-related protein complex 4 subunit epsilon; AltName: Full=Epsilon subunit of AP-4; AltName: Full=Epsilon-adaptin;	SubName: Full=Uncharacterized protein {ECO:0000313|EMBL:KRH76456.1, ECO:0000313|EnsemblPlants:GLYMA01G35650.1};	Vesicle coat complex AP-1, gamma subunit	GO:0030124,AP-4 adaptor complex; GO:0005905,clathrin-coated pit; GO:0005829,cytosol; GO:0005794,Golgi apparatus; GO:0009506,plasmodesma; GO:0006886,intracellular protein transport; GO:0016192,vesicle-mediated transport	PF01602.20:Adaptin N terminal region
Glyma.01G024300	9	Chr01	2484222	2486235	K06997 PLP dependent protein | (RefSeq) proline synthase co-transcribed bacterial homolog protein-like (A)	--	PREDICTED: uncharacterized protein LOC102668432 isoform X1 [Glycine max]	--	SubName: Full=Uncharacterized protein {ECO:0000313|EnsemblPlants:GLYMA01G02990.3};	--	GO:0016021,integral component of membrane	--
Glyma.01G024600	8	Chr01	2504633	2507081	K01092 myo-inositol-1(or 4)-monophosphatase [EC:3.1.3.25] | (RefSeq) phosphatase IMPL1, chloroplastic-like isoform X1 (A)	ko00562: Inositol phosphate metabolism; ko04070: Phosphatidylinositol signaling system	hypothetical protein GLYMA_01G024600 [Glycine max]	RecName: Full=Protein CURVATURE THYLAKOID 1D, chloroplastic; Flags: Precursor;	SubName: Full=Uncharacterized protein {ECO:0000313|EnsemblPlants:GLYMA01G03020.1};	--	GO:0009535,chloroplast thylakoid membrane; GO:0016021,integral component of membrane	PF14159.6:CAAD domains of cyanobacterial aminoacyl-tRNA synthetase
Glyma.01G025000	3	Chr01	2558045	2560286	K15777 4,5-DOPA dioxygenase extradiol [EC:1.13.11.-] | (RefSeq) uncharacterized protein LOC110630336 (A)	ko00965: Betalain biosynthesis	PREDICTED: zinc-finger homeodomain protein 1-like isoform X2 [Glycine max]	RecName: Full=Zinc-finger homeodomain protein 1; Short=OsZHD1;	SubName: Full=Uncharacterized protein {ECO:0000313|EMBL:KRH74513.1, ECO:0000313|EnsemblPlants:GLYMA01G03060.1};	--	GO:0005634,nucleus; GO:0003677,DNA binding; GO:0046872,metal ion binding; GO:0006355,regulation of transcription, DNA-templated; GO:0006351,transcription, DNA-templated	PF04770.12:ZF-HD protein dimerisation region
Glyma.01G025100	10	Chr01	2601431	2602687	--	--	--	--	--	--	--	--
Glyma.01G025200	7	Chr01	2616281	2621186	K03327 multidrug resistance protein, MATE family | (RefSeq) protein DETOXIFICATION 27-like (A)	--	PREDICTED: protein DETOXIFICATION 27 [Glycine max]	RecName: Full=Protein DETOXIFICATION 27 {ECO:0000303|PubMed:11739388}; Short=AtDTX27 {ECO:0000303|PubMed:11739388}; AltName: Full=Multidrug and toxic compound extrusion protein 27 {ECO:0000305}; Short=MATE protein 27 {ECO:0000305};	RecName: Full=Protein DETOXIFICATION {ECO:0000256|RuleBase:RU004914}; AltName: Full=Multidrug and toxic compound extrusion protein {ECO:0000256|RuleBase:RU004914};	Uncharacterized membrane protein, predicted efflux pump	GO:0016021,integral component of membrane; GO:0015297,antiporter activity; GO:0015238,drug transmembrane transporter activity; GO:0006855,drug transmembrane transport	PF01554.18:MatE
Glyma.01G026100	1	Chr01	2741832	2744918	K02900 large subunit ribosomal protein L27Ae | (RefSeq) 60S ribosomal protein L27a-3-like (A)	ko03010: Ribosome	60S ribosomal protein L27a [Glycine max]	RecName: Full=60S ribosomal protein L27a-3;	SubName: Full=Uncharacterized protein {ECO:0000313|EMBL:ACU17282.1, ECO:0000313|EnsemblPlants:GLYMA01G03180.1};	60s ribosomal protein L15/L27	GO:0005829,cytosol; GO:0022625,cytosolic large ribosomal subunit; GO:0022626,cytosolic ribosome; GO:0016020,membrane; GO:0009506,plasmodesma; GO:0042788,polysomal ribosome; GO:0003723,RNA binding; GO:0003735,structural constituent of ribosome; GO:0002181,cytoplasmic translation	PF00828.19:Ribosomal proteins 50S-L15, 50S-L18e, 60S-L27A
Glyma.01G169800	5	Chr01	50726088	50733347	K18204 D-2-hydroxyglutarate dehydrogenase [EC:1.1.99.39] | (RefSeq) D-2-hydroxyglutarate dehydrogenase, mitochondrial (A)	--	PREDICTED: D-2-hydroxyglutarate dehydrogenase, mitochondrial [Glycine max]	RecName: Full=D-2-hydroxyglutarate dehydrogenase, mitochondrial; Short=AtD-2HGDH; EC=1.1.99.39; Flags: Precursor;	SubName: Full=Uncharacterized protein {ECO:0000313|EMBL:KRH76711.1, ECO:0000313|EnsemblPlants:GLYMA01G37490.2};	Proteins containing the FAD binding domain	GO:0005739,mitochondrion; GO:0051990,(R)-2-hydroxyglutarate dehydrogenase activity; GO:0047545,2-hydroxyglutarate dehydrogenase activity; GO:0004458,D-lactate dehydrogenase (cytochrome) activity; GO:0071949,FAD binding; GO:0019516,lactate oxidation; GO:0006807,nitrogen compound metabolic process; GO:0009853,photorespiration; GO:0022904,respiratory electron transport chain	PF02913.19:FAD linked oxidases, C-terminal domain
Glyma.01G028100	10	Chr01	2929035	2934455	K20606 mitogen-activated protein kinase kinase kinase ANP1 [EC:2.7.11.25] | (RefSeq) receptor-like serine/threonine-protein kinase SD1-7 isoform X1 (A)	ko04016: MAPK signaling pathway - plant	PREDICTED: cysteine-rich receptor-like protein kinase 2 [Glycine max]	RecName: Full=Cysteine-rich receptor-like protein kinase 2; Short=Cysteine-rich RLK2; EC=2.7.11.-; Flags: Precursor;	SubName: Full=Uncharacterized protein {ECO:0000313|EMBL:KRH74553.1, ECO:0000313|EnsemblPlants:GLYMA01G03420.2};	--	GO:0016021,integral component of membrane; GO:0005886,plasma membrane; GO:0009506,plasmodesma; GO:0005524,ATP binding; GO:0004674,protein serine/threonine kinase activity; GO:0046777,protein autophosphorylation; GO:0010193,response to ozone	PF07714.17:Protein tyrosine kinase
Glyma.01G028500	9	Chr01	2999967	3001495	--	--	early nodulin-36A [Glycine max]	RecName: Full=Early nodulin-36A; Short=N-36A;	SubName: Full=Uncharacterized protein {ECO:0000313|EMBL:KRH74564.1};	--	GO:0009877,nodulation	--
Glyma.01G028600	10	Chr01	3002314	3007143	K23877 xyloglucan O-acetyltransferase | (RefSeq) hypothetical protein (A)	--	PREDICTED: protein trichome birefringence-like 2 [Glycine max]	RecName: Full=Protein trichome birefringence-like 2;	SubName: Full=Uncharacterized protein {ECO:0000313|EMBL:KRH74565.1, ECO:0000313|EnsemblPlants:GLYMA01G03480.2};	--	GO:0005794,Golgi apparatus; GO:0016021,integral component of membrane; GO:0016413,O-acetyltransferase activity; GO:0071554,cell wall organization or biogenesis	PF13839.6:GDSL/SGNH-like Acyl-Esterase family found in Pmr5 and Cas1p
Glyma.01G028800	9	Chr01	3037245	3038559	--	--	PREDICTED: F-box/kelch-repeat protein At1g23390-like [Glycine max]	RecName: Full=F-box/kelch-repeat protein At1g23390;	SubName: Full=Uncharacterized protein {ECO:0000313|EMBL:KRH74567.1, ECO:0000313|EnsemblPlants:GLYMA01G03500.1};	--	GO:0005829,cytosol; GO:0005634,nucleus; GO:0043161,proteasome-mediated ubiquitin-dependent protein catabolic process	PF13964.6:Kelch motif
Glyma.01G177000	5	Chr01	51351296	51353967	--	--	Vicilin-like antimicrobial peptides 2-2 [Glycine soja]	RecName: Full=Vicilin-like seed storage protein At2g18540; AltName: Full=Globulin At2g18540; Flags: Precursor;	SubName: Full=Uncharacterized protein {ECO:0000313|EMBL:KRH76842.1, ECO:0000313|EnsemblPlants:GLYMA01G38340.2};	--	GO:0045735,nutrient reservoir activity	PF00190.22:Cupin
Glyma.01G029200	8	Chr01	3098701	3100169	K02977 small subunit ribosomal protein S27Ae | (RefSeq) ubiquitin-40S ribosomal protein S27a-like (A)	ko03010: Ribosome; ko04120: Ubiquitin mediated proteolysis	putative ubiquitin-40S ribosomal protein S27a [Glycine max]	RecName: Full=Ubiquitin-40S ribosomal protein S27a; Contains: RecName: Full=Ubiquitin; Contains: RecName: Full=40S ribosomal protein S27a; Flags: Precursor;	SubName: Full=Ubiquitin-40S ribosomal protein S27a {ECO:0000313|EMBL:KHN14565.1};	Ubiquitin/40S ribosomal protein S27a fusion	GO:0005634,nucleus; GO:0005840,ribosome; GO:0046872,metal ion binding; GO:0003735,structural constituent of ribosome; GO:0006412,translation	PF00240.23:Ubiquitin family
Glyma.01G029800	6	Chr01	3148712	3151772	K07937 ADP-ribosylation factor 1 | (RefSeq) ADP-ribosylation factor 2 isoform X1 (A)	ko04144: Endocytosis	hypothetical protein GLYMA_01G029800 [Glycine max]	RecName: Full=ADP-ribosylation factor 2;	SubName: Full=Uncharacterized protein {ECO:0000313|EMBL:KRH74584.1, ECO:0000313|EnsemblPlants:GLYMA01G03650.1};	GTP-binding ADP-ribosylation factor Arf1	GO:0005794,Golgi apparatus; GO:0005525,GTP binding; GO:0006886,intracellular protein transport; GO:0006471,protein ADP-ribosylation; GO:0007264,small GTPase mediated signal transduction; GO:0016192,vesicle-mediated transport	PF00025.21:ADP-ribosylation factor family
Glyma.01G179900	5	Chr01	51599739	51607197	--	--	PREDICTED: BEL1-like homeodomain protein 4 [Glycine max]	RecName: Full=BEL1-like homeodomain protein 2; Short=BEL1-like protein 2; AltName: Full=Protein SAWTOOTH 1;	SubName: Full=Uncharacterized protein {ECO:0000313|EMBL:KRH76894.1, ECO:0000313|EnsemblPlants:GLYMA01G38650.2};	Transcription factor MEIS1 and related HOX domain proteins	GO:0005634,nucleus; GO:0003677,DNA binding; GO:0003700,DNA-binding transcription factor activity; GO:0009965,leaf morphogenesis; GO:0006351,transcription, DNA-templated	PF07526.11:Associated with HOX
Glyma.01G030900	10	Chr01	3234395	3237574	K06699 proteasome activator subunit 4 | (RefSeq) hypothetical protein (A)	ko03050: Proteasome	PREDICTED: probable polygalacturonase non-catalytic subunit JP650 [Glycine max]	RecName: Full=Polygalacturonase 1 beta-like protein 3 {ECO:0000303|PubMed:26106400}; Short=AtPGL3 {ECO:0000303|PubMed:26106400}; AltName: Full=Aromatic-rich glycoprotein JP650; AltName: Full=PG1beta-like protein 3 {ECO:0000303|PubMed:26106400}; AltName: Full=Polygalacturonase 2 {ECO:0000303|PubMed:19639386}; AltName: Full=Probable polygalacturonase non-catalytic subunit JP650; Flags: Precursor;	SubName: Full=Uncharacterized protein {ECO:0000313|EMBL:KRH74604.1, ECO:0000313|EnsemblPlants:GLYMA01G03760.2};	--	GO:0048046,apoplast; GO:0005618,cell wall	PF03181.15:BURP domain
Glyma.01G031300	7	Chr01	3257841	3260562	--	--	PREDICTED: uncharacterized protein LOC100808883 [Glycine max]	--	SubName: Full=Uncharacterized protein {ECO:0000313|EMBL:KRH74610.1, ECO:0000313|EnsemblPlants:GLYMA01G03790.1};	--	--	PF06075.12:Plant protein of unknown function (DUF936)
Glyma.01G031800	8	Chr01	3328121	3334148	K03549 KUP system potassium uptake protein | (RefSeq) potassium transporter 6-like (A)	--	PREDICTED: potassium transporter 6-like [Glycine max]	RecName: Full=Potassium transporter 6; Short=AtHAK6; Short=AtPOT6;	RecName: Full=Potassium transporter {ECO:0000256|RuleBase:RU321113};	--	GO:0016021,integral component of membrane; GO:0005886,plasma membrane; GO:0015079,potassium ion transmembrane transporter activity	PF02705.16:K+ potassium transporter
Glyma.01G182200	5	Chr01	51789271	51789839	--	--	hypothetical protein glysoja_003314 [Glycine soja]	--	SubName: Full=Uncharacterized protein {ECO:0000313|EMBL:KRH76926.1, ECO:0000313|EnsemblPlants:GLYMA01G38905.1};	--	--	--
Glyma.01G190300	5	Chr01	52511846	52513110	--	--	uncharacterized protein LOC100806219 [Glycine max]	--	SubName: Full=Uncharacterized protein {ECO:0000313|EMBL:ACU16964.1, ECO:0000313|EnsemblPlants:GLYMA01G39750.1};	--	--	--
Glyma.01G032200	8	Chr01	3392970	3394819	K10663 E3 ubiquitin-protein ligase ATL4 [EC:2.3.2.27] | (RefSeq) putative RING-H2 finger protein ATL49 (A)	--	PREDICTED: RING-H2 finger protein ATL47-like [Glycine max]	RecName: Full=RING-H2 finger protein ATL46; EC=2.3.2.27 {ECO:0000305}; AltName: Full=RING-type E3 ubiquitin transferase ATL46 {ECO:0000305};	SubName: Full=RING-H2 finger protein ATL46 {ECO:0000313|EMBL:KHN12094.1};	FOG: Predicted E3 ubiquitin ligase	GO:0016021,integral component of membrane; GO:0046872,metal ion binding; GO:0061630,ubiquitin protein ligase activity; GO:0043161,proteasome-mediated ubiquitin-dependent protein catabolic process	PF13639.6:Ring finger domain
Glyma.01G033200	4	Chr01	3487315	3493797	K10406 kinesin family member C2/C3 | (RefSeq) LOW QUALITY PROTEIN: disease resistance protein RPS6-like (A)	--	PREDICTED: protein SUPPRESSOR OF npr1-1, CONSTITUTIVE 1-like [Glycine max]	RecName: Full=Protein SUPPRESSOR OF npr1-1, CONSTITUTIVE 1 {ECO:0000303|PubMed:14576290}; Short=AtSNC1 {ECO:0000303|PubMed:14576290}; AltName: Full=Disease resistance RPP5-like protein;	SubName: Full=Uncharacterized protein {ECO:0000313|EMBL:KRH74635.1};	--	GO:0005737,cytoplasm; GO:0005829,cytosol; GO:0005783,endoplasmic reticulum; GO:0043231,intracellular membrane-bounded organelle; GO:0005634,nucleus; GO:0043531,ADP binding; GO:0005524,ATP binding; GO:0000166,nucleotide binding; GO:0042742,defense response to bacterium; GO:0009733,response to auxin; GO:0009862,systemic acquired resistance, salicylic acid mediated signaling pathway	PF01582.20:TIR domain
Glyma.01G033500	3	Chr01	3514070	3519602	K17500 integrin-linked kinase-associated serine/threonine phosphatase 2C [EC:3.1.3.16] | (RefSeq) WAT1-related protein At3g18200 isoform X1 (A)	--	PREDICTED: WAT1-related protein At5g40210-like [Glycine max]	RecName: Full=WAT1-related protein At5g40210;	RecName: Full=WAT1-related protein {ECO:0000256|RuleBase:RU363077};	--	GO:0016021,integral component of membrane; GO:0005886,plasma membrane; GO:0022857,transmembrane transporter activity	PF00892.20:EamA-like transporter family
Glyma.01G033700	10	Chr01	3526381	3533019	K17500 integrin-linked kinase-associated serine/threonine phosphatase 2C [EC:3.1.3.16] | (RefSeq) WAT1-related protein At3g18200 isoform X1 (A)	--	PREDICTED: WAT1-related protein At5g40210 [Glycine max]	RecName: Full=WAT1-related protein At5g40210;	RecName: Full=WAT1-related protein {ECO:0000256|RuleBase:RU363077};	--	GO:0016021,integral component of membrane; GO:0005886,plasma membrane; GO:0022857,transmembrane transporter activity	PF00892.20:EamA-like transporter family
Glyma.01G033800	9	Chr01	3535699	3539383	K17500 integrin-linked kinase-associated serine/threonine phosphatase 2C [EC:3.1.3.16] | (RefSeq) WAT1-related protein At3g18200 isoform X1 (A)	--	hypothetical protein GLYMA_01G033800 [Glycine max]	RecName: Full=WAT1-related protein At5g40240;	RecName: Full=WAT1-related protein {ECO:0000256|RuleBase:RU363077};	--	GO:0016021,integral component of membrane; GO:0005886,plasma membrane; GO:0022857,transmembrane transporter activity	PF00892.20:EamA-like transporter family
Glyma.01G034000	10	Chr01	3552796	3554812	K10781 fatty acyl-ACP thioesterase B [EC:3.1.2.14 3.1.2.21] | (RefSeq) uncharacterized protein LOC113347984 isoform X1 (A)	ko00061: Fatty acid biosynthesis; ko01212: Fatty acid metabolism	uncharacterized protein LOC100499973 [Glycine max]	RecName: Full=MLP-like protein 423;	SubName: Full=MLP-like protein 423 {ECO:0000313|EMBL:KHN09901.1};	--	GO:0016020,membrane; GO:0006952,defense response; GO:0009607,response to biotic stimulus	PF00407.19:Pathogenesis-related protein Bet v I family
Glyma.01G035000	7	Chr01	3626092	3630869	K14611 solute carrier family 23 (nucleobase transporter), member 1 | (RefSeq) nucleobase-ascorbate transporter 6 (A)	--	PREDICTED: nucleobase-ascorbate transporter 6-like isoform X1 [Glycine max]	RecName: Full=Nucleobase-ascorbate transporter 7; Short=AtNAT7;	SubName: Full=Uncharacterized protein {ECO:0000313|EMBL:KRH74660.1};	Xanthine/uracil transporters	GO:0016021,integral component of membrane; GO:0005886,plasma membrane; GO:0009506,plasmodesma; GO:0022857,transmembrane transporter activity	PF00860.20:Permease family
Glyma.01G035300	10	Chr01	3678713	3680543	--	--	PREDICTED: uncharacterized protein LOC100777177 [Glycine max]	--	SubName: Full=Uncharacterized protein {ECO:0000313|EMBL:KHN45292.1};	--	--	PF14009.6:Domain of unknown function (DUF4228)
Glyma.01G037700	12	Chr01	4005744	4010445	--	--	hypothetical protein GLYMA_01G037700 [Glycine max]	RecName: Full=Protein WVD2-like 7 {ECO:0000305};	SubName: Full=Uncharacterized protein {ECO:0000313|EMBL:KRH74703.1};	--	GO:0005737,cytoplasm; GO:0005874,microtubule	--
Glyma.01G190600	5	Chr01	52532796	52534956	K14487 auxin responsive GH3 gene family | (RefSeq) probable indole-3-acetic acid-amido synthetase GH3.1 (A)	ko04075: Plant hormone signal transduction	PREDICTED: probable indole-3-acetic acid-amido synthetase GH3.1 [Glycine max]	RecName: Full=Probable indole-3-acetic acid-amido synthetase GH3.1; EC=6.3.2.-; AltName: Full=Auxin-responsive GH3-like protein 1; Short=AtGH3-1;	SubName: Full=Uncharacterized protein {ECO:0000313|EMBL:KRH77064.1, ECO:0000313|EnsemblPlants:GLYMA01G39780.1};	--	GO:0016874,ligase activity; GO:0009733,response to auxin	PF03321.13:GH3 auxin-responsive promoter
Glyma.01G038100	9	Chr01	4033780	4041344	K12599 antiviral helicase SKI2 [EC:3.6.4.-] | (RefSeq) DExH-box ATP-dependent RNA helicase DExH11-like isoform X2 (A)	ko03018: RNA degradation	PREDICTED: DEAD-box ATP-dependent RNA helicase ISE2, chloroplastic [Glycine max]	RecName: Full=DExH-box ATP-dependent RNA helicase DExH15 chloroplastic {ECO:0000305}; EC=3.6.4.13; AltName: Full=ATP-dependent RNA helicase ISE2; AltName: Full=Protein EMBRYO DEFECTIVE 25; AltName: Full=Protein INCREASED SIZE EXCLUSION LIMIT 2; AltName: Full=Protein PIGMENT DEFECTIVE 317; Flags: Precursor;	SubName: Full=Uncharacterized protein {ECO:0000313|EMBL:KRH74713.1, ECO:0000313|EnsemblPlants:GLYMA01G04476.1};	Cytoplasmic exosomal RNA helicase SKI2, DEAD-box superfamily	GO:0009507,chloroplast; GO:0009570,chloroplast stroma; GO:0010494,cytoplasmic stress granule; GO:0005730,nucleolus; GO:0005524,ATP binding; GO:0004004,ATP-dependent RNA helicase activity; GO:0003723,RNA binding; GO:0003724,RNA helicase activity; GO:0009793,embryo development ending in seed dormancy; GO:0031047,gene silencing by RNA; GO:0000373,Group II intron splicing; GO:0006397,mRNA processing;…	PF08148.12:DSHCT (NUC185) domain
Glyma.01G039000	9	Chr01	4212429	4220941	K00695 sucrose synthase [EC:2.4.1.13] | (GenBank) sucrose synthase (A)	ko00500: Starch and sucrose metabolism	PREDICTED: TMV resistance protein N-like [Glycine max]	RecName: Full=TMV resistance protein N;	SubName: Full=Uncharacterized protein {ECO:0000313|EMBL:KRH74726.1, ECO:0000313|EnsemblPlants:GLYMA01G04590.1};	--	GO:0005737,cytoplasm; GO:0043531,ADP binding; GO:0005524,ATP binding; GO:0009626,plant-type hypersensitive response; GO:0007165,signal transduction	PF00931.22:NB-ARC domain
Glyma.01G039200	9	Chr01	4239455	4243298	K18878 BHLH transcription factor Upa20 | (RefSeq) Upa20; transcription factor bHLH137-like (A)	ko04626: Plant-pathogen interaction	hypothetical protein GLYMA_01G039200 [Glycine max]	RecName: Full=Transcription factor BHLH094 {ECO:0000305}; AltName: Full=Basic helix-loop-helix protein 94 {ECO:0000303|PubMed:16896230}; Short=OsbHLH094 {ECO:0000303|PubMed:16896230}; AltName: Full=bHLH transcription factor bHLH094 {ECO:0000305};	SubName: Full=Uncharacterized protein {ECO:0000313|EMBL:KRH74728.1, ECO:0000313|EnsemblPlants:GLYMA01G04610.4};	--	GO:0005634,nucleus; GO:0003677,DNA binding; GO:0046983,protein dimerization activity; GO:0006355,regulation of transcription, DNA-templated; GO:0006351,transcription, DNA-templated	PF00010.26:Helix-loop-helix DNA-binding domain
Glyma.01G039500	10	Chr01	4289457	4295639	--	--	PREDICTED: uncharacterized protein LOC100787325 [Glycine max]	RecName: Full=Protein ENHANCED DISEASE RESISTANCE 2;	SubName: Full=Uncharacterized protein {ECO:0000313|EMBL:KRH74733.1, ECO:0000313|EnsemblPlants:GLYMA01G04630.1};	--	GO:0005789,endoplasmic reticulum membrane; GO:0010008,endosome membrane; GO:0016021,integral component of membrane; GO:0005886,plasma membrane; GO:0008289,lipid binding; GO:0070273,phosphatidylinositol-4-phosphate binding; GO:0009873,ethylene-activated signaling pathway; GO:1900056,negative regulation of leaf senescence; GO:0009626,plant-type hypersensitive response; GO:1900150,regulation of defe…	PF07059.12:Protein of unknown function (DUF1336)
Glyma.01G040000	9	Chr01	4336374	4338196	K00799 glutathione S-transferase [EC:2.5.1.18] | (RefSeq) GSTU1; uncharacterized LOC100500281 (A)	ko00480: Glutathione metabolism	tau class glutathione S-transferase [Glycine max]	RecName: Full=Glutathione S-transferase U18; Short=AtGSTU18; EC=2.5.1.18; AltName: Full=GST class-tau member 18; AltName: Full=Glutathione S-transferase 29;	SubName: Full=Tau class glutathione S-transferase {ECO:0000313|EMBL:AJE59644.1};	Glutathione S-transferase	GO:0005737,cytoplasm; GO:0005829,cytosol; GO:0004364,glutathione transferase activity; GO:0006749,glutathione metabolic process; GO:0009407,toxin catabolic process	PF02798.20:Glutathione S-transferase, N-terminal domain
Glyma.01G040200	8	Chr01	4345723	4347332	K00799 glutathione S-transferase [EC:2.5.1.18] | (RefSeq) GSTU3; glutathione S-transferase GST 5 (A)	ko00480: Glutathione metabolism	glutathione S-transferase GST 5 [Glycine max]	RecName: Full=Glutathione S-transferase U18; Short=AtGSTU18; EC=2.5.1.18; AltName: Full=GST class-tau member 18; AltName: Full=Glutathione S-transferase 29;	SubName: Full=Glutathione S-transferase GST 5 {ECO:0000313|EMBL:AAG34795.1}; EC=2.5.1.18 {ECO:0000313|EMBL:AAG34795.1}; SubName: Full=Tau class glutathione S-transferase {ECO:0000313|EMBL:AJE59645.1};	Glutathione S-transferase	GO:0005737,cytoplasm; GO:0005829,cytosol; GO:0004364,glutathione transferase activity; GO:0006749,glutathione metabolic process; GO:0009407,toxin catabolic process	PF02798.20:Glutathione S-transferase, N-terminal domain
Glyma.01G040700	9	Chr01	4392159	4393458	K03671 thioredoxin 1 | (RefSeq) thioredoxin H2-like (A)	--	uncharacterized protein LOC100527298 [Glycine max]	RecName: Full=Thioredoxin H2; Short=AtTrxh2; AltName: Full=Thioredoxin 2; Short=AtTRX2;	RecName: Full=Thioredoxin {ECO:0000256|PIRNR:PIRNR000077};	Thioredoxin	GO:0005829,cytosol; GO:0005739,mitochondrion; GO:0005886,plasma membrane; GO:0016671,oxidoreductase activity, acting on a sulfur group of donors, disulfide as acceptor; GO:0015035,protein disulfide oxidoreductase activity; GO:0047134,protein-disulfide reductase activity; GO:0004791,thioredoxin-disulfide reductase activity; GO:0045454,cell redox homeostasis; GO:0034599,cellular response to oxidati…	PF00085.20:Thioredoxin
Glyma.01G041700	9	Chr01	4530106	4532731	K09338 homeobox-leucine zipper protein | (RefSeq) hypothetical protein (A)	--	Homeobox-leucine zipper protein HAT5 [Glycine soja]	RecName: Full=Homeobox-leucine zipper protein HAT5; AltName: Full=HD-ZIP protein ATHB-1; AltName: Full=Homeodomain transcription factor ATHB-1; AltName: Full=Homeodomain-leucine zipper protein HAT5; Short=HD-ZIP protein 5;	SubName: Full=Uncharacterized protein {ECO:0000313|EMBL:KRH74760.1, ECO:0000313|EnsemblPlants:GLYMA01G04890.1};	Transcription factor HEX, contains HOX and HALZ domains	GO:0005634,nucleus; GO:0003700,DNA-binding transcription factor activity; GO:0042803,protein homodimerization activity; GO:0043565,sequence-specific DNA binding; GO:0009965,leaf morphogenesis; GO:0045893,positive regulation of transcription, DNA-templated; GO:0009637,response to blue light; GO:0009651,response to salt stress; GO:0006351,transcription, DNA-templated	PF02183.18:Homeobox associated leucine zipper
Glyma.01G200100	5	Chr01	53383512	53390082	K14638 solute carrier family 15 (peptide/histidine transporter), member 3/4 | (RefSeq) protein NRT1/ PTR FAMILY 7.3-like (A)	--	PREDICTED: protein NRT1/ PTR FAMILY 7.3-like [Glycine max]	RecName: Full=Protein NRT1/ PTR FAMILY 7.3; Short=AtNPF7.3; AltName: Full=Nitrate transporter 1.5;	SubName: Full=Uncharacterized protein {ECO:0000313|EMBL:KRH77224.1, ECO:0000313|EnsemblPlants:GLYMA01G40850.1};	H+/oligopeptide symporter	GO:0016021,integral component of membrane; GO:0005886,plasma membrane; GO:0015112,nitrate transmembrane transporter activity; GO:0015386,potassium:proton antiporter activity; GO:0015293,symporter activity; GO:1902600,proton transmembrane transport; GO:0010150,leaf senescence; GO:0015706,nitrate transport; GO:0055075,potassium ion homeostasis; GO:0010167,response to nitrate	PF00854.21:POT family
Glyma.01G043700	10	Chr01	4755228	4758910	K13435 serine/threonine-protein kinase Pto | (RefSeq) Pto; serine/threonine protein kinase Pto (A)	ko04626: Plant-pathogen interaction	PREDICTED: probable LRR receptor-like serine/threonine-protein kinase At1g14390 [Glycine max]	RecName: Full=Probable LRR receptor-like serine/threonine-protein kinase At1g14390; EC=2.7.11.1; Flags: Precursor;	SubName: Full=Uncharacterized protein {ECO:0000313|EMBL:KRH74803.1, ECO:0000313|EnsemblPlants:GLYMA01G05090.1};	--	GO:0016021,integral component of membrane; GO:0005524,ATP binding; GO:0004674,protein serine/threonine kinase activity	PF00069.25:Protein kinase domain
Glyma.01G044000	8	Chr01	4828066	4829670	K22422 protein downstream neighbor of Son | (RefSeq) hypothetical protein (A)	--	PREDICTED: heme-binding protein 2 [Glycine max]	RecName: Full=Heme-binding-like protein At3g10130, chloroplastic; Flags: Precursor;	SubName: Full=Uncharacterized protein {ECO:0000313|EMBL:ACU20720.1, ECO:0000313|EnsemblPlants:GLYMA01G05150.1}; Flags: Fragment;	--	GO:0009507,chloroplast; GO:0009535,chloroplast thylakoid membrane; GO:0010287,plastoglobule	PF04832.12:SOUL heme-binding protein
Glyma.01G044300	6	Chr01	4877269	4884892	K09422 transcription factor MYB, plant | (RefSeq) transcription factor MYB88-like (A)	--	PREDICTED: myb-related protein 3R-1-like [Glycine max]	RecName: Full=Transcription factor MYB88 {ECO:0000303|PubMed:9839469}; AltName: Full=Myb-related protein 88 {ECO:0000303|PubMed:9839469}; Short=AtMYB88 {ECO:0000303|PubMed:9839469};	SubName: Full=Uncharacterized protein {ECO:0000313|EMBL:KRH74814.1, ECO:0000313|EnsemblPlants:GLYMA01G05190.2};	Transcription factor, Myb superfamily	GO:0005634,nucleus; GO:0003700,DNA-binding transcription factor activity; GO:0000981,DNA-binding transcription factor activity, RNA polymerase II-specific; GO:0043565,sequence-specific DNA binding; GO:0001135,RNA polymerase II transcription regulator recruiting activity; GO:0044212,transcription regulatory region DNA binding; GO:0009553,embryo sac development; GO:0010052,guard cell differentiatio…	PF00249.31:Myb-like DNA-binding domain
Glyma.01G044600	10	Chr01	4922421	4924621	K09338 homeobox-leucine zipper protein | (RefSeq) homeobox-leucine zipper protein ATHB-13-like isoform X1 (A)	--	PREDICTED: uncharacterized protein LOC100814080 isoform X2 [Glycine max]	RecName: Full=Homeobox-leucine zipper protein ATHB-13; AltName: Full=HD-ZIP protein ATHB-13; AltName: Full=Homeodomain transcription factor ATHB-13;	SubName: Full=Uncharacterized protein {ECO:0000313|EMBL:KRH74821.1};	Transcription factor HEX, contains HOX and HALZ domains	GO:0005634,nucleus; GO:0003700,DNA-binding transcription factor activity; GO:0043565,sequence-specific DNA binding; GO:0048826,cotyledon morphogenesis; GO:0009965,leaf morphogenesis; GO:0080022,primary root development; GO:0009744,response to sucrose; GO:0006351,transcription, DNA-templated	PF02183.18:Homeobox associated leucine zipper
Glyma.01G045200	4	Chr01	5106053	5107135	--	--	PREDICTED: uncharacterized protein LOC100819761 [Glycine max]	--	SubName: Full=Uncharacterized protein {ECO:0000313|EMBL:KRH74830.1, ECO:0000313|EnsemblPlants:GLYMA01G05350.1};	--	--	--
Glyma.01G202700	5	Chr01	53546708	53548994	K11420 euchromatic histone-lysine N-methyltransferase [EC:2.1.1.43] | (RefSeq) histone-lysine N-methyltransferase, H3 lysine-9 specific SUVH6 (A)	ko00310: Lysine degradation	PREDICTED: histone-lysine N-methyltransferase, H3 lysine-9 specific SUVH6-like [Glycine max]	RecName: Full=Histone-lysine N-methyltransferase, H3 lysine-9 specific SUVH6; EC=2.1.1.43; AltName: Full=Histone H3-K9 methyltransferase 6; Short=H3-K9-HMTase 6; AltName: Full=Protein SET DOMAIN GROUP 23; AltName: Full=Suppressor of variegation 3-9 homolog protein 6; Short=Su(var)3-9 homolog protein 6;	SubName: Full=Uncharacterized protein {ECO:0000313|EMBL:KRH77260.1, ECO:0000313|EnsemblPlants:GLYMA01G41120.1};	--	GO:0000775,chromosome, centromeric region; GO:0005634,nucleus; GO:0018024,histone-lysine N-methyltransferase activity; GO:0008327,methyl-CpG binding; GO:0010428,methyl-CpNpG binding; GO:0010429,methyl-CpNpN binding; GO:0008168,methyltransferase activity; GO:0008270,zinc ion binding; GO:0016571,histone methylation	PF02182.17:SAD/SRA domain
Glyma.01G046200	8	Chr01	5327037	5330673	--	--	haloacid dehalogenase-like hydrolase domain-containing protein isoform 1 [Glycine max]	--	SubName: Full=Uncharacterized protein {ECO:0000313|EMBL:KRH74846.1, ECO:0000313|EnsemblPlants:GLYMA01G05490.1};	Predicted hydrolase (HAD superfamily)	GO:0016787,hydrolase activity; GO:0008152,metabolic process	PF13419.6:Haloacid dehalogenase-like hydrolase
Glyma.01G207300	5	Chr01	53930520	53932364	K09338 homeobox-leucine zipper protein | (RefSeq) homeobox-leucine zipper protein HAT4-like (A)	--	PREDICTED: homeobox-leucine zipper protein HAT4 [Glycine max]	RecName: Full=Homeobox-leucine zipper protein HAT4; AltName: Full=HD-ZIP protein ATHB-2; AltName: Full=Homeodomain transcription factor ATHB-2; AltName: Full=Homeodomain-leucine zipper protein HAT4; Short=HD-ZIP protein 4;	SubName: Full=Uncharacterized protein {ECO:0000313|EMBL:KRH77331.1, ECO:0000313|EnsemblPlants:GLYMA01G41581.1};	Transcription factor HEX, contains HOX and HALZ domains	GO:0005634,nucleus; GO:0003700,DNA-binding transcription factor activity; GO:0042803,protein homodimerization activity; GO:0043565,sequence-specific DNA binding; GO:0008283,cell proliferation; GO:0045892,negative regulation of transcription, DNA-templated; GO:0010017,red or far-red light signaling pathway; GO:0009585,red, far-red light phototransduction; GO:0009733,response to auxin; GO:0009735,r…	PF04618.12:HD-ZIP protein N terminus
Glyma.01G047000	8	Chr01	5484606	5486622	K02915 large subunit ribosomal protein L34e | (RefSeq) 60S ribosomal protein L34 (A)	ko03010: Ribosome	60S ribosomal protein L34 [Glycine max]	RecName: Full=60S ribosomal protein L34;	SubName: Full=60S ribosomal protein L34 {ECO:0000313|EMBL:KHN12211.1};	60s ribosomal protein L34	GO:0005840,ribosome; GO:0003735,structural constituent of ribosome; GO:0006412,translation	PF01199.18:Ribosomal protein L34e
Glyma.01G047900	3	Chr01	5585129	5586802	K15777 4,5-DOPA dioxygenase extradiol [EC:1.13.11.-] | (RefSeq) uncharacterized protein LOC110630336 (A)	ko00965: Betalain biosynthesis	PREDICTED: zinc-finger homeodomain protein 11-like [Glycine max]	RecName: Full=Zinc-finger homeodomain protein 8; Short=AtZHD8; AltName: Full=Homeobox protein 30; Short=AtHB-30; AltName: Full=Zinc finger homeodomain transcriptional factor ZFHD3;	SubName: Full=Uncharacterized protein {ECO:0000313|EMBL:KRH74865.1, ECO:0000313|EnsemblPlants:GLYMA01G05810.1};	--	GO:0005634,nucleus; GO:0003677,DNA binding; GO:0046872,metal ion binding; GO:0042803,protein homodimerization activity; GO:0043565,sequence-specific DNA binding; GO:0044212,transcription regulatory region DNA binding; GO:0019760,glucosinolate metabolic process; GO:0006355,regulation of transcription, DNA-templated; GO:0006351,transcription, DNA-templated	PF04770.12:ZF-HD protein dimerisation region
Glyma.01G212000	5	Chr01	54354496	54357612	K22073 transferase CAF17, mitochondrial [EC:2.1.-.-] | (RefSeq) putative transferase At4g12130, mitochondrial (A)	--	hypothetical protein GLYMA_01G212000 [Glycine max]	RecName: Full=Putative transferase At4g12130, mitochondrial {ECO:0000305}; EC=2.1.-.- {ECO:0000305}; AltName: Full=Iron-sulfur cluster assembly factor homolog COG0354 {ECO:0000305}; Flags: Precursor;	SubName: Full=Uncharacterized protein {ECO:0000313|EMBL:KRH77411.1, ECO:0000313|EnsemblPlants:GLYMA01G42120.1};	Transcription factor, component of CCR4 transcriptional complex	GO:0005759,mitochondrial matrix; GO:0016740,transferase activity; GO:0016226,iron-sulfur cluster assembly	--
Glyma.01G050900	10	Chr01	6028164	6030169	K08901 photosystem II oxygen-evolving enhancer protein 3 | (RefSeq) photosynthetic NDH subunit of lumenal location 2, chloroplastic (A)	ko00195: Photosynthesis	PREDICTED: photosynthetic NDH subunit of lumenal location 2, chloroplastic [Glycine max]	RecName: Full=Photosynthetic NDH subunit of lumenal location 2, chloroplastic {ECO:0000303|PubMed:21785130}; AltName: Full=PsbQ-like protein 1; Flags: Precursor;	SubName: Full=Uncharacterized protein {ECO:0000313|EMBL:KRH74903.1, ECO:0000313|EnsemblPlants:GLYMA01G06110.2};	--	GO:0009507,chloroplast; GO:0009534,chloroplast thylakoid; GO:0009543,chloroplast thylakoid lumen; GO:0009535,chloroplast thylakoid membrane; GO:0019898,extrinsic component of membrane; GO:0009344,nitrite reductase complex [NAD(P)H]; GO:0009654,photosystem II oxygen evolving complex; GO:0005509,calcium ion binding; GO:0045156,electron transporter, transferring electrons within the cyclic electron …	PF05757.11:Oxygen evolving enhancer protein 3 (PsbQ)
Glyma.01G053300	8	Chr01	6710590	6717720	K20027 palmitoyltransferase ZDHHC1/11 [EC:2.3.1.225] | (RefSeq) probable protein S-acyltransferase 22 (A)	--	PREDICTED: probable protein S-acyltransferase 22 [Glycine max]	RecName: Full=Probable protein S-acyltransferase 22; EC=2.3.1.225; AltName: Full=Probable palmitoyltransferase At1g69420; AltName: Full=Zinc finger DHHC domain-containing protein At1g69420;	RecName: Full=S-acyltransferase {ECO:0000256|RuleBase:RU079119}; EC=2.3.1.225 {ECO:0000256|RuleBase:RU079119}; AltName: Full=Palmitoyltransferase {ECO:0000256|RuleBase:RU079119};	DHHC-type Zn-finger proteins	GO:0030659,cytoplasmic vesicle membrane; GO:0016021,integral component of membrane; GO:0005886,plasma membrane; GO:0019706,protein-cysteine S-palmitoyltransferase activity	PF01529.20:DHHC palmitoyltransferase
Glyma.01G054400	2	Chr01	7002015	7004894	--	--	PREDICTED: uncharacterized protein At5g01610-like [Glycine max]	RecName: Full=Uncharacterized protein At5g01610;	SubName: Full=Uncharacterized protein {ECO:0000313|EMBL:KHN03141.1};	--	--	PF04398.12:Protein of unknown function, DUF538
Glyma.01G054500	8	Chr01	7017265	7022503	K01850 chorismate mutase [EC:5.4.99.5] | (RefSeq) chorismate mutase 3, chloroplastic (A)	ko00400: Phenylalanine, tyrosine and tryptophan biosynthesis; ko01230: Biosynthesis of amino acids	PREDICTED: chorismate mutase 3, chloroplastic isoform X1 [Glycine max]	RecName: Full=Chorismate mutase 1, chloroplastic; Short=AtCM1; EC=5.4.99.5; AltName: Full=CM-1; Flags: Precursor;	RecName: Full=Chorismate mutase {ECO:0000256|PIRNR:PIRNR017318}; EC=5.4.99.5 {ECO:0000256|PIRNR:PIRNR017318};	Chorismate mutase	GO:0009507,chloroplast; GO:0005829,cytosol; GO:0004106,chorismate mutase activity; GO:0016688,L-ascorbate peroxidase activity; GO:0009073,aromatic amino acid family biosynthetic process; GO:0046417,chorismate metabolic process	--
Glyma.01G055400	10	Chr01	7165678	7167174	--	--	uncharacterized protein LOC100790671 [Glycine max]	--	SubName: Full=Uncharacterized protein {ECO:0000313|EMBL:KHN39712.1};	--	--	--
Glyma.01G056100	8	Chr01	7235777	7238343	K05658 ATP-binding cassette, subfamily B (MDR/TAP), member 1 [EC:7.6.2.2] | (RefSeq) uncharacterized protein LOC111781709 (A)	ko02010: ABC transporters	PREDICTED: protein SRG1 [Glycine max]	RecName: Full=Protein SRG1; Short=AtSRG1; AltName: Full=Protein SENESCENCE-RELATED GENE 1;	SubName: Full=Protein SRG1 {ECO:0000313|EMBL:KHN03628.1};	Iron/ascorbate family oxidoreductases	GO:0046872,metal ion binding; GO:0016682,oxidoreductase activity, acting on diphenols and related substances as donors, oxygen as acceptor; GO:0010150,leaf senescence	PF03171.20:2OG-Fe(II) oxygenase superfamily
Glyma.01G217400	5	Chr01	54770777	54773002	K09419 heat shock transcription factor, other eukaryote | (RefSeq) heat stress transcription factor B-2b-like (A)	--	heat stress transcription factor Hsf-03 [Glycine max]	RecName: Full=Heat stress transcription factor B-2b; Short=AtHsfB2b; AltName: Full=AtHsf-11; AltName: Full=Heat shock factor protein 7; Short=HSF 7; AltName: Full=Heat shock transcription factor 7; Short=HSTF 7;	SubName: Full=Uncharacterized protein {ECO:0000313|EMBL:KRH77500.1, ECO:0000313|EnsemblPlants:GLYMA01G42640.1};	Heat shock transcription factor	GO:0005634,nucleus; GO:0003700,DNA-binding transcription factor activity; GO:0043565,sequence-specific DNA binding; GO:0045892,negative regulation of transcription, DNA-templated; GO:0010200,response to chitin; GO:0006351,transcription, DNA-templated	PF00447.17:HSF-type DNA-binding
Glyma.01G056800	10	Chr01	7371198	7374974	K12835 ATP-dependent RNA helicase DDX42 [EC:3.6.4.13] | (RefSeq) DEAD-box ATP-dependent RNA helicase 24 isoform X1 (A)	ko03040: Spliceosome	WRKY32 protein [Glycine max]	RecName: Full=Probable WRKY transcription factor 57; AltName: Full=WRKY DNA-binding protein 57;	SubName: Full=Uncharacterized protein {ECO:0000313|EMBL:KRH75008.1, ECO:0000313|EnsemblPlants:GLYMA01G06870.2};	--	GO:0005634,nucleus; GO:0003700,DNA-binding transcription factor activity; GO:0043565,sequence-specific DNA binding; GO:0044212,transcription regulatory region DNA binding; GO:0006970,response to osmotic stress; GO:0009651,response to salt stress; GO:0009414,response to water deprivation; GO:0006351,transcription, DNA-templated	PF03106.15:WRKY DNA -binding domain
Glyma.01G057100	2	Chr01	7507611	7510385	K00012 UDPglucose 6-dehydrogenase [EC:1.1.1.22] | (RefSeq) UDP-glucose 6-dehydrogenase 4-like (A)	ko00040: Pentose and glucuronate interconversions; ko00053: Ascorbate and aldarate metabolism; ko00520: Amino sugar and nucleotide sugar metabolism	UDP-glucose 6-dehydrogenase 4-like [Glycine max]	RecName: Full=UDP-glucose 6-dehydrogenase 4; Short=UDP-Glc dehydrogenase 4; Short=UDP-GlcDH 4; Short=UDPGDH 4; EC=1.1.1.22; AltName: Full=Os-UGD4;	RecName: Full=UDP-glucose 6-dehydrogenase {ECO:0000256|PIRNR:PIRNR000124}; EC=1.1.1.22 {ECO:0000256|PIRNR:PIRNR000124};	UDP-glucose/GDP-mannose dehydrogenase	GO:0005829,cytosol; GO:0005634,nucleus; GO:0051287,NAD binding; GO:0003979,UDP-glucose 6-dehydrogenase activity; GO:0006024,glycosaminoglycan biosynthetic process; GO:0006065,UDP-glucuronate biosynthetic process	PF03721.14:UDP-glucose/GDP-mannose dehydrogenase family, NAD binding domain
Glyma.01G219400	5	Chr01	54898589	54899940	K00432 glutathione peroxidase [EC:1.11.1.9] | (RefSeq) probable phospholipid hydroperoxide glutathione peroxidase (A)	ko00480: Glutathione metabolism; ko00590: Arachidonic acid metabolism	uncharacterized protein LOC100306570 [Glycine max]	RecName: Full=Probable phospholipid hydroperoxide glutathione peroxidase; Short=PHGPx; EC=1.11.1.12; AltName: Full=Salt-associated protein;	RecName: Full=Glutathione peroxidase {ECO:0000256|RuleBase:RU000499};	Glutathione peroxidase	GO:0005737,cytoplasm; GO:0004602,glutathione peroxidase activity; GO:0047066,phospholipid-hydroperoxide glutathione peroxidase activity; GO:0006979,response to oxidative stress	PF00255.19:Glutathione peroxidase
Glyma.01G058400	12	Chr01	7685939	7692724	--	--	PREDICTED: uncharacterized hydrolase YugF-like isoform X1 [Glycine max]	--	SubName: Full=2-hydroxy-6-oxononadienedioate/2-hydroxy-6-oxononatrienedioate hydrolase {ECO:0000313|EMBL:KHN03648.1};	Predicted hydrolase/acyltransferase (alpha/beta hydrolase superfamily)	GO:0016787,hydrolase activity	PF12697.7:Alpha/beta hydrolase family
Glyma.01G058500	10	Chr01	7722265	7728511	--	--	PREDICTED: probable ureide permease A3 isoform X1 [Glycine max]	RecName: Full=Probable ureide permease A3; AltName: Full=VuA3; Flags: Fragment;	SubName: Full=Uncharacterized protein {ECO:0000313|EMBL:KRH75038.1, ECO:0000313|EnsemblPlants:GLYMA01G07120.1};	--	GO:0016021,integral component of membrane; GO:0005524,ATP binding; GO:0022857,transmembrane transporter activity; GO:0071705,nitrogen compound transport	PF07168.11:Ureide permease
Glyma.01G060300	12	Chr01	8127582	8132640	--	--	PREDICTED: ninja-family protein AFP3-like [Glycine max]	RecName: Full=Ninja-family protein AFP2; AltName: Full=ABI five-binding protein 2; Short=ABI5-binding protein 2;	SubName: Full=Uncharacterized protein {ECO:0000313|EMBL:KRH75067.1, ECO:0000313|EnsemblPlants:GLYMA01G07390.1};	--	GO:0005634,nucleus; GO:0009737,response to abscisic acid; GO:0009414,response to water deprivation; GO:0007165,signal transduction	PF16136.5:Putative nuclear localisation signal
Glyma.01G061000	3	Chr01	8397419	8398861	--	--	hypothetical protein glysoja_036148 [Glycine soja]	--	SubName: Full=Uncharacterized protein {ECO:0000313|EMBL:KHN44937.1};	--	GO:0016021,integral component of membrane	--
Glyma.01G061100	8	Chr01	8436335	8438675	K20619 cytochrome P450 family 78 subfamily A | (RefSeq) cytochrome P450 78A5-like (A)	--	PREDICTED: cytochrome P450 78A5-like [Glycine max]	RecName: Full=Cytochrome P450 78A5; EC=1.14.-.-; AltName: Full=Protein KLUH;	SubName: Full=Uncharacterized protein {ECO:0000313|EMBL:KRH75078.1, ECO:0000313|EnsemblPlants:GLYMA01G07580.2};	Cytochrome P450 CYP2 subfamily	GO:0005783,endoplasmic reticulum; GO:0016021,integral component of membrane; GO:0016020,membrane; GO:0020037,heme binding; GO:0005506,iron ion binding; GO:0016709,oxidoreductase activity, acting on paired donors, with incorporation or reduction of molecular oxygen, NAD(P)H as one donor, and incorporation of one atom of oxygen; GO:0048437,floral organ development; GO:0035265,organ growth; GO:00082…	PF00067.22:Cytochrome P450
Glyma.01G061500	3	Chr01	8475357	8504398	K04411 serine/threonine kinase 4 | (RefSeq) MAPKKKK1; mitogen activated protein kinase kinase kinase kinase 1 (A)	--	PREDICTED: serine/threonine-protein kinase dst1-like isoform X2 [Glycine max]	RecName: Full=MAP3K epsilon protein kinase 1 {ECO:0000303|PubMed:11489177}; Short=AtM3KE1 {ECO:0000303|PubMed:11489177}; EC=2.7.11.1 {ECO:0000250|UniProtKB:A0A078CGE6}; AltName: Full=Mitogen-activated protein kinase kinase kinase 7 {ECO:0000305};	SubName: Full=Uncharacterized protein {ECO:0000313|EMBL:KRH75082.1, ECO:0000313|EnsemblPlants:GLYMA01G07641.1};	Mitogen-activated protein kinase kinase kinase kinase (MAP4K), germinal center kinase family	GO:0005829,cytosol; GO:0005815,microtubule organizing center; GO:0005730,nucleolus; GO:0005886,plasma membrane; GO:0005524,ATP binding; GO:0004674,protein serine/threonine kinase activity; GO:0032147,activation of protein kinase activity; GO:0007049,cell cycle; GO:0051301,cell division; GO:0046777,protein autophosphorylation; GO:0051302,regulation of cell division; GO:0045995,regulation of embryo…	PF00069.25:Protein kinase domain
Glyma.01G061900	8	Chr01	8561723	8563024	--	--	hypothetical protein GLYMA_01G061900 [Glycine max]	--	SubName: Full=Uncharacterized protein {ECO:0000313|EMBL:KRH75086.1, ECO:0000313|EnsemblPlants:GLYMA01G07743.1};	--	--	--
Glyma.01G062400	9	Chr01	8714119	8719741	K00276 primary-amine oxidase [EC:1.4.3.21] | (RefSeq) primary amine oxidase-like (A)	ko00260: Glycine, serine and threonine metabolism; ko00350: Tyrosine metabolism; ko00360: Phenylalanine metabolism; ko00410: beta-Alanine metabolism; ko00950: Isoquinoline alkaloid biosynthesis; ko00960: Tropane, piperidine and pyridine alkaloid biosynthesis	putative copper amine oxidase precursor [Glycine max]	RecName: Full=Primary amine oxidase; EC=1.4.3.21 {ECO:0000250|UniProtKB:P12807}; AltName: Full=Amine oxidase [copper-containing]; Flags: Precursor;	RecName: Full=Amine oxidase {ECO:0000256|RuleBase:RU000672}; EC=1.4.3.- {ECO:0000256|RuleBase:RU000672};	Copper amine oxidase	GO:0052595,aliphatic-amine oxidase activity; GO:0052594,aminoacetone:oxygen oxidoreductase(deaminating) activity; GO:0005507,copper ion binding; GO:0052597,diamine oxidase activity; GO:0052596,phenethylamine:oxygen oxidoreductase (deaminating) activity; GO:0008131,primary amine oxidase activity; GO:0048038,quinone binding; GO:0052593,tryptamine:oxygen oxidoreductase (deaminating) activity; GO:000…	PF01179.20:Copper amine oxidase, enzyme domain
Glyma.01G226100	5	Chr01	55470092	55471377	--	--	PREDICTED: uncharacterized protein LOC100820289 [Glycine max]	--	SubName: Full=Uncharacterized protein {ECO:0000313|EMBL:KRH77660.1, ECO:0000313|EnsemblPlants:GLYMA01G43570.2};	--	GO:0016021,integral component of membrane	PF03168.13:Late embryogenesis abundant protein
Glyma.01G063800	2	Chr01	9223274	9225348	--	--	PREDICTED: protein BIG GRAIN 1-like E [Glycine max]	RecName: Full=Protein BIG GRAIN 1-like E {ECO:0000305};	SubName: Full=Uncharacterized protein {ECO:0000313|EMBL:KHN28444.1};	--	GO:0005886,plasma membrane; GO:0060918,auxin transport; GO:0009734,auxin-activated signaling pathway; GO:0010929,positive regulation of auxin mediated signaling pathway	--
Glyma.01G227900	5	Chr01	55609866	55612612	K22418 11beta/17beta-hydroxysteroid dehydrogenase [EC:1.1.1.146 1.1.1.-] | (RefSeq) 11-beta-hydroxysteroid dehydrogenase-like 5 (A)	--	uncharacterized protein LOC100780731 [Glycine max]	RecName: Full=11-beta-hydroxysteroid dehydrogenase-like 5; EC=1.1.1.-; AltName: Full=17-beta-hydroxysteroid dehydrogenase-like 5; EC=1.1.1.-; AltName: Full=Hydroxysteroid dehydrogenase 5; Short=AtHSD5;	SubName: Full=Uncharacterized protein {ECO:0000313|EMBL:ACU18023.1, ECO:0000313|EnsemblPlants:GLYMA01G43780.1};	Predicted dehydrogenase	GO:0016021,integral component of membrane; GO:0016491,oxidoreductase activity; GO:0006694,steroid biosynthetic process	PF00106.25:short chain dehydrogenase
Glyma.01G067200	1	Chr01	10956610	10960136	K00679 phospholipid:diacylglycerol acyltransferase [EC:2.3.1.158] | (RefSeq) hypothetical protein (A)	ko00561: Glycerolipid metabolism	PREDICTED: GDSL esterase/lipase At2g03980-like [Glycine max]	RecName: Full=GDSL esterase/lipase At2g03980; EC=3.1.1.-; AltName: Full=Extracellular lipase At2g03980; Flags: Precursor;	SubName: Full=GDSL esterase/lipase {ECO:0000313|EMBL:KHN28425.1}; EC=1.3.5.6 {ECO:0000313|EMBL:KHN28425.1};	--	GO:0005576,extracellular region; GO:0016788,hydrolase activity, acting on ester bonds; GO:0016042,lipid catabolic process	PF00657.22:GDSL-like Lipase/Acylhydrolase
Glyma.01G238600	5	Chr01	56294511	56297459	K09489 heat shock 70kDa protein 4 | (RefSeq) heat shock 70 kDa protein 8 (A)	--	HSP70 family protein [Glycine max]	RecName: Full=Heat shock 70 kDa protein 8; AltName: Full=Heat shock protein 70-8; Short=AtHsp70-8; AltName: Full=Heat-shock protein 70T-2;	SubName: Full=Heat shock 70 kDa protein 8 {ECO:0000313|EMBL:KHN30470.1}; EC=1.3.1.74 {ECO:0000313|EMBL:KHN30470.1};	Molecular chaperones HSP70/HSC70, HSP70 superfamily	GO:0005524,ATP binding; GO:0009408,response to heat; GO:0009644,response to high light intensity; GO:0042542,response to hydrogen peroxide	PF00012.20:Hsp70 protein
Glyma.01G067600	1	Chr01	11026341	11029542	K08139 MFS transporter, SP family, sugar:H+ symporter | (RefSeq) hypothetical protein (A)	--	PREDICTED: sugar transport protein 12-like [Glycine max]	RecName: Full=Sugar transport protein 1; AltName: Full=Glucose transporter; AltName: Full=Hexose transporter 1;	SubName: Full=Uncharacterized protein {ECO:0000313|EMBL:KRH75177.1, ECO:0000313|EnsemblPlants:GLYMA01G09220.1};	Predicted transporter (major facilitator superfamily)	GO:0016021,integral component of membrane; GO:0005634,nucleus; GO:0005886,plasma membrane; GO:0009506,plasmodesma; GO:0005773,vacuole; GO:0005355,glucose transmembrane transporter activity; GO:0015145,monosaccharide transmembrane transporter activity; GO:0005351,carbohydrate:proton symporter activity; GO:0046323,glucose import; GO:0035428,NA; GO:0015749,monosaccharide transmembrane transport	PF00083.24:Sugar (and other) transporter
Glyma.01G068200	10	Chr01	11346525	11349256	K05658 ATP-binding cassette, subfamily B (MDR/TAP), member 1 [EC:7.6.2.2] | (RefSeq) uncharacterized protein LOC111781709 (A)	ko02010: ABC transporters	PREDICTED: protein SRG1-like [Glycine max]	RecName: Full=Protein SRG1; Short=AtSRG1; AltName: Full=Protein SENESCENCE-RELATED GENE 1;	SubName: Full=Uncharacterized protein {ECO:0000313|EMBL:KRH75184.1};	Iron/ascorbate family oxidoreductases	GO:0046872,metal ion binding; GO:0016682,oxidoreductase activity, acting on diphenols and related substances as donors, oxygen as acceptor; GO:0010150,leaf senescence	PF03171.20:2OG-Fe(II) oxygenase superfamily
Glyma.01G244500	5	Chr01	56688886	56690806	K13412 calcium-dependent protein kinase [EC:2.7.11.1] | (RefSeq) hypothetical protein (A)	ko04626: Plant-pathogen interaction	PREDICTED: protein SRC2 homolog [Glycine max]	RecName: Full=Elicitor-responsive protein 1; Short=OsERG1 {ECO:0000303|PubMed:23456295}; AltName: Full=17 kDa phloem protein; AltName: Full=Fungal elicitor immediate early-responsive gene 1 protein; Short=FIERG1; AltName: Full=RPP17;	SubName: Full=Uncharacterized protein {ECO:0000313|EMBL:KHN30416.1};	Predicted Ca2+-dependent phospholipid-binding protein	GO:0005737,cytoplasm; GO:0005886,plasma membrane; GO:0005544,calcium-dependent phospholipid binding; GO:0006952,defense response	PF00168.30:C2 domain
Glyma.01G069000	2	Chr01	11591808	11592486	--	--	hypothetical protein glysoja_030742 [Glycine soja]	--	SubName: Full=Uncharacterized protein {ECO:0000313|EMBL:KHN31091.1};	--	GO:0016021,integral component of membrane	--
Glyma.01G069400	8	Chr01	11724197	11725139	--	--	PREDICTED: phytosulfokines 1-like [Glycine max]	RecName: Full=Phytosulfokines 1; Short=AtPSK1; Contains: RecName: Full=Phytosulfokine-alpha; Short=PSK-alpha; Short=Phytosulfokine-a; Contains: RecName: Full=Phytosulfokine-beta; Short=PSK-beta; Short=Phytosulfokine-b; Flags: Precursor;	SubName: Full=Phytosulfokines 1 {ECO:0000313|EMBL:KHN31085.1};	--	GO:0031012,extracellular matrix; GO:0008083,growth factor activity; GO:0030154,cell differentiation; GO:0008283,cell proliferation; GO:0007275,multicellular organism development	PF06404.12:Phytosulfokine precursor protein (PSK)
Glyma.01G069500	9	Chr01	11732152	11738156	K04077 chaperonin GroEL | (RefSeq) ruBisCO large subunit-binding protein subunit beta, chloroplastic-like isoform X1 (A)	ko03018: RNA degradation	PREDICTED: ruBisCO large subunit-binding protein subunit beta, chloroplastic-like isoform X1 [Glycine max]	RecName: Full=Chaperonin 60 subunit beta 4, chloroplastic; Short=CPN-60 beta 4; Flags: Precursor;	SubName: Full=Chaperonin 60 subunit beta 4, chloroplastic {ECO:0000313|EMBL:KHN31084.1};	Mitochondrial chaperonin, Cpn60/Hsp60p	GO:0009507,chloroplast; GO:0009941,chloroplast envelope; GO:0009570,chloroplast stroma; GO:0005829,cytosol; GO:0005524,ATP binding; GO:0044183,protein binding involved in protein folding; GO:0051082,unfolded protein binding; GO:0006458,'de novo' protein folding; GO:0061077,chaperone-mediated protein folding; GO:0006457,protein folding; GO:0042026,protein refolding	PF00118.24:TCP-1/cpn60 chaperonin family
Glyma.01G070400	12	Chr01	12565349	12574539	--	--	uncharacterized protein LOC100784302 [Glycine max]	--	SubName: Full=Uncharacterized protein {ECO:0000313|EMBL:ACU20769.1};	--	GO:0005542,folic acid binding; GO:0016740,transferase activity; GO:0008152,metabolic process	PF07837.12:Formiminotransferase domain, N-terminal subdomain
Glyma.01G071300	8	Chr01	12899424	12902300	K01611 S-adenosylmethionine decarboxylase [EC:4.1.1.50] | (RefSeq) S-adenosylmethionine decarboxylase proenzyme-like (A)	ko00270: Cysteine and methionine metabolism; ko00330: Arginine and proline metabolism	PREDICTED: S-adenosylmethionine decarboxylase proenzyme [Glycine max]	RecName: Full=S-adenosylmethionine decarboxylase proenzyme; Short=AdoMetDC; Short=SAMDC; EC=4.1.1.50; Contains: RecName: Full=S-adenosylmethionine decarboxylase alpha chain; Contains: RecName: Full=S-adenosylmethionine decarboxylase beta chain; Flags: Precursor;	RecName: Full=S-adenosylmethionine decarboxylase proenzyme {ECO:0000256|PIRNR:PIRNR001355}; EC=4.1.1.50 {ECO:0000256|PIRNR:PIRNR001355};	S-adenosylmethionine decarboxylase	GO:0004014,adenosylmethionine decarboxylase activity; GO:0006557,S-adenosylmethioninamine biosynthetic process; GO:0008295,spermidine biosynthetic process; GO:0006597,spermine biosynthetic process	PF01536.16:Adenosylmethionine decarboxylase
Glyma.01G071700	2	Chr01	12951040	12956255	K13418 somatic embryogenesis receptor kinase 1 [EC:2.7.10.1 2.7.11.1] | (RefSeq) LRR receptor kinase BAK1-like (A)	--	PREDICTED: protein NSP-INTERACTING KINASE 2-like [Glycine max]	RecName: Full=Protein NSP-INTERACTING KINASE 1 {ECO:0000303|PubMed:15489295}; Short=AtNIK1 {ECO:0000303|PubMed:15489295}; EC=2.7.11.1 {ECO:0000269|PubMed:15489295}; AltName: Full=LRR receptor-like serine/threonine-protein kinase NIK1 {ECO:0000303|PubMed:15489295}; Flags: Precursor;	SubName: Full=Uncharacterized protein {ECO:0000313|EMBL:KRH75229.1, ECO:0000313|EnsemblPlants:GLYMA01G10100.1};	--	GO:0005737,cytoplasm; GO:0016021,integral component of membrane; GO:0005654,nucleoplasm; GO:0005886,plasma membrane; GO:0005524,ATP binding; GO:0004672,protein kinase activity; GO:0004675,transmembrane receptor protein serine/threonine kinase activity; GO:0007166,cell surface receptor signaling pathway; GO:0051607,defense response to virus; GO:0040015,negative regulation of multicellular organism…	PF00069.25:Protein kinase domain
Glyma.01G074800	9	Chr01	16555204	16559087	--	--	hypothetical protein glysoja_045953 [Glycine soja]	--	SubName: Full=Uncharacterized protein {ECO:0000313|EMBL:KHN20171.1};	--	GO:0016021,integral component of membrane	--
Glyma.01G076200	12	Chr01	17776330	17777629	--	--	PREDICTED: uncharacterized protein LOC100797722 [Glycine max]	--	SubName: Full=Uncharacterized protein {ECO:0000313|EMBL:KHN49007.1};	--	--	--
Glyma.01G078200	9	Chr01	19949543	19950725	K14488 SAUR family protein | (RefSeq) auxin-responsive protein SAUR36-like (A)	ko04075: Plant hormone signal transduction	PREDICTED: auxin-responsive protein SAUR36 [Glycine max]	RecName: Full=Auxin-responsive protein SAUR36 {ECO:0000305}; AltName: Full=Protein RESPONSE TO AUXINS AND GIBBERELLINS 1 {ECO:0000303|PubMed:23503980}; AltName: Full=Protein SENESCENCE-ASSOCIATED GENE 201 {ECO:0000305}; AltName: Full=Protein SMALL AUXIN UP RNA 36 {ECO:0000303|PubMed:12036261};	SubName: Full=Uncharacterized protein {ECO:0000313|EMBL:KRH75321.1, ECO:0000313|EnsemblPlants:GLYMA01G17300.1};	--	GO:0005634,nucleus; GO:0009734,auxin-activated signaling pathway; GO:0007275,multicellular organism development; GO:1900057,positive regulation of leaf senescence; GO:0040008,regulation of growth; GO:0010029,regulation of seed germination	PF02519.14:Auxin responsive protein
Glyma.01G078800	10	Chr01	20581143	20582048	K11855 ubiquitin carboxyl-terminal hydrolase 36/42 [EC:3.4.19.12] | (RefSeq) ubiquitin carboxyl-terminal hydrolase 36 (A)	--	alpha-amylase inhibitor/lipid transfer/seed storage family protein precursor [Glycine max]	RecName: Full=Putative lipid-binding protein At4g00165; Flags: Precursor;	SubName: Full=Putative lipid-binding protein {ECO:0000313|EMBL:KHN25540.1};	--	GO:0005576,extracellular region	PF14547.6:Hydrophobic seed protein
Glyma.01G079500	8	Chr01	20974302	20977697	K14494 DELLA protein | (RefSeq) DELLA protein GAI-like (A)	ko04075: Plant hormone signal transduction	PREDICTED: scarecrow-like protein 27 [Glycine max]	RecName: Full=Scarecrow-like protein 6; Short=AtSCL6; AltName: Full=GRAS family protein 22; Short=AtGRAS-22; AltName: Full=SCL6-IV;	SubName: Full=Scarecrow-like protein 6 {ECO:0000313|EMBL:KHN31643.1};	--	GO:0005634,nucleus; GO:0003700,DNA-binding transcription factor activity; GO:0043565,sequence-specific DNA binding; GO:0030154,cell differentiation; GO:0051301,cell division; GO:0007623,circadian rhythm; GO:0006355,regulation of transcription, DNA-templated; GO:0048768,root hair cell tip growth; GO:0006351,transcription, DNA-templated	PF03514.14:GRAS domain family
Glyma.01G080400	6	Chr01	22123621	22126726	--	--	PREDICTED: uncharacterized protein LOC100806931 isoform X2 [Glycine max]	RecName: Full=Acyl-acyl carrier protein thioesterase ATL3, chloroplastic {ECO:0000305}; EC=3.1.2.- {ECO:0000305}; AltName: Full=Acyl-ACP thioesterase ATL3 {ECO:0000305}; AltName: Full=Acyl-lipid thioesterase 3 {ECO:0000303|PubMed:24214063}; Flags: Precursor;	SubName: Full=Uncharacterized protein {ECO:0000313|EMBL:KHN06887.1};	--	GO:0009507,chloroplast; GO:0047381,dodecanoyl-[acyl-carrier-protein] hydrolase activity; GO:0016295,myristoyl-[acyl-carrier-protein] hydrolase activity; GO:0016296,palmitoyl-[acyl-carrier-protein] hydrolase activity; GO:0006629,lipid metabolic process	PF03061.22:Thioesterase superfamily
Glyma.01G081400	1	Chr01	23592381	23594265	K08235 xyloglucan:xyloglucosyl transferase [EC:2.4.1.207] | (RefSeq) probable xyloglucan endotransglucosylase/hydrolase protein 8 (A)	--	hypothetical protein GLYMA_01G081400 [Glycine max]	RecName: Full=Probable xyloglucan endotransglucosylase/hydrolase protein 8; Short=At-XTH8; Short=XTH-8; EC=2.4.1.207; Flags: Precursor;	SubName: Full=Uncharacterized protein {ECO:0000313|EMBL:KRH75376.1, ECO:0000313|EnsemblPlants:GLYMA01G20565.1};	--	GO:0048046,apoplast; GO:0005618,cell wall; GO:0004553,hydrolase activity, hydrolyzing O-glycosyl compounds; GO:0016762,xyloglucan:xyloglucosyl transferase activity; GO:0042546,cell wall biogenesis; GO:0071555,cell wall organization; GO:0010411,xyloglucan metabolic process	PF00722.21:Glycosyl hydrolases family 16
Glyma.01G081600	9	Chr01	23676252	23681805	K14638 solute carrier family 15 (peptide/histidine transporter), member 3/4 | (RefSeq) protein NRT1/ PTR FAMILY 3.1-like (A)	--	PREDICTED: protein NRT1/ PTR FAMILY 3.1 [Glycine max]	RecName: Full=Protein NRT1/ PTR FAMILY 3.1; Short=AtNPF3.1;	SubName: Full=Putative nitrite transporter {ECO:0000313|EMBL:KHN47573.1};	H+/oligopeptide symporter	GO:0016021,integral component of membrane; GO:0097708,intracellular vesicle; GO:0005886,plasma membrane; GO:0022857,transmembrane transporter activity; GO:0010336,gibberellic acid homeostasis; GO:0042128,nitrate assimilation	PF00854.21:POT family
Glyma.01G081900	6	Chr01	23798254	23813425	K00627 pyruvate dehydrogenase E2 component (dihydrolipoamide acetyltransferase) [EC:2.3.1.12] | (RefSeq) dihydrolipoyllysine-residue acetyltransferase component 4 of pyruvate dehydrogenase complex, chloroplastic-like (A)	ko00010: Glycolysis / Gluconeogenesis; ko00020: Citrate cycle (TCA cycle); ko00620: Pyruvate metabolism; ko01200: Carbon metabolism	PREDICTED: dihydrolipoyllysine-residue acetyltransferase component 4 of pyruvate dehydrogenase complex, chloroplastic-like [Glycine max]	RecName: Full=Dihydrolipoyllysine-residue acetyltransferase component 4 of pyruvate dehydrogenase complex, chloroplastic; EC=2.3.1.12; AltName: Full=Dihydrolipoamide S-acetyltransferase component 4 of pyruvate dehydrogenase complex; AltName: Full=Pyruvate dehydrogenase complex component E2 4; Short=PDC-E2 4; Short=PDCE2 4; Short=plE2; Flags: Precursor;	RecName: Full=Dihydrolipoamide acetyltransferase component of pyruvate dehydrogenase complex {ECO:0000256|RuleBase:RU003423}; EC=2.3.1.- {ECO:0000256|RuleBase:RU003423};	Dihydrolipoamide acetyltransferase	GO:0009507,chloroplast; GO:0009941,chloroplast envelope; GO:0009570,chloroplast stroma; GO:0009534,chloroplast thylakoid; GO:0022626,cytosolic ribosome; GO:0016020,membrane; GO:0004742,dihydrolipoyllysine-residue acetyltransferase activity; GO:0006086,acetyl-CoA biosynthetic process from pyruvate; GO:0006096,glycolytic process	PF00198.23:2-oxoacid dehydrogenases acyltransferase (catalytic domain)
Glyma.01G082000	9	Chr01	23857597	23861023	K01246 DNA-3-methyladenine glycosylase I [EC:3.2.2.20] | (RefSeq) uncharacterized protein LOC114413323 (A)	ko03410: Base excision repair	PREDICTED: DNA-3-methyladenine glycosylase [Glycine max]	--	SubName: Full=Uncharacterized protein {ECO:0000313|EMBL:KRH75383.1, ECO:0000313|EnsemblPlants:GLYMA01G20740.1};	--	GO:0008725,DNA-3-methyladenine glycosylase activity; GO:0006284,base-excision repair	PF03352.13:Methyladenine glycosylase
Glyma.01G083000	9	Chr01	24167139	24169616	K19476 vacuolar protein sorting-associated protein IST1 | (RefSeq) uncharacterized protein LOC114413459 (A)	ko04144: Endocytosis	uncharacterized protein LOC100812818 [Glycine max]	--	SubName: Full=IST1-like protein {ECO:0000313|EMBL:KHN45056.1};	Spindle pole body protein	GO:0015031,protein transport	PF03398.14:Regulator of Vps4 activity in the MVB pathway
Glyma.01G084600	2	Chr01	24993913	24996242	K22683 aspartyl protease family protein [EC:3.4.23.-] | (RefSeq) protein ASPARTIC PROTEASE IN GUARD CELL 1-like (A)	--	PREDICTED: protein ASPARTIC PROTEASE IN GUARD CELL 1-like [Glycine max]	RecName: Full=Protein ASPARTIC PROTEASE IN GUARD CELL 1; Short=AtASPG1; EC=3.4.23.-; Flags: Precursor;	SubName: Full=Uncharacterized protein {ECO:0000313|EMBL:KRH75429.1, ECO:0000313|EnsemblPlants:GLYMA01G21480.1};	Aspartyl protease	GO:0005783,endoplasmic reticulum; GO:0004190,aspartic-type endopeptidase activity; GO:0070001,aspartic-type peptidase activity; GO:0003677,DNA binding; GO:0030163,protein catabolic process; GO:0009737,response to abscisic acid; GO:0009414,response to water deprivation; GO:0009627,systemic acquired resistance	PF14543.6:Xylanase inhibitor N-terminal
Glyma.01G084800	10	Chr01	25124410	25126268	K19476 vacuolar protein sorting-associated protein IST1 | (RefSeq) hypothetical protein (A)	ko04144: Endocytosis	PREDICTED: lysine histidine transporter-like 6 [Glycine max]	RecName: Full=Lysine histidine transporter-like 6;	SubName: Full=Lysine histidine transporter-like 6 {ECO:0000313|EMBL:KHN32489.1};	Amino acid transporters	GO:0016021,integral component of membrane; GO:0005886,plasma membrane; GO:0015171,amino acid transmembrane transporter activity; GO:0003333,amino acid transmembrane transport	PF01490.18:Transmembrane amino acid transporter protein
Glyma.01G085000	8	Chr01	25186222	25186807	--	--	PREDICTED: uncharacterized protein LOC102667900 isoform X1 [Glycine max]	--	SubName: Full=Uncharacterized protein {ECO:0000313|EMBL:KHN46933.1};	--	--	--
Glyma.01G085800	9	Chr01	25378303	25380965	K23452 UDP-glucosyltransferase 85A [EC:2.4.1.-] | (RefSeq) UDP-glycosyltransferase 85A1-like (A)	ko00908: Zeatin biosynthesis	PREDICTED: UDP-glycosyltransferase 83A1-like [Glycine max]	RecName: Full=UDP-glycosyltransferase 83A1; EC=2.4.1.-;	SubName: Full=Uncharacterized protein {ECO:0000313|EMBL:KRH75447.1, ECO:0000313|EnsemblPlants:GLYMA01G21620.1};	UDP-glucuronosyl and UDP-glucosyl transferase	GO:0043231,intracellular membrane-bounded organelle; GO:0080043,quercetin 3-O-glucosyltransferase activity; GO:0080044,quercetin 7-O-glucosyltransferase activity; GO:0008152,metabolic process	PF00201.18:UDP-glucoronosyl and UDP-glucosyl transferase
Glyma.01G086800	3	Chr01	26114013	26116018	K12309 beta-galactosidase [EC:3.2.1.23] | (Kazusa) Lj3g3v0323160.2; - (A)	ko00052: Galactose metabolism; ko00511: Other glycan degradation; ko00531: Glycosaminoglycan degradation; ko00600: Sphingolipid metabolism; ko00604: Glycosphingolipid biosynthesis - ganglio series	PREDICTED: zinc finger protein WIP6-like [Glycine max]	RecName: Full=Zinc finger protein WIP6; AltName: Full=Protein DEFECTIVELY ORGANIZED TRIBUTARIES 5 {ECO:0000303|PubMed:18643975}; AltName: Full=WIP-domain protein 6 {ECO:0000303|PubMed:11782451}; Short=AtWIP6 {ECO:0000303|PubMed:11782451};	SubName: Full=Protein TRANSPARENT TESTA 1 {ECO:0000313|EMBL:KHN42481.1};	FOG: Zn-finger	GO:0005634,nucleus; GO:0003700,DNA-binding transcription factor activity; GO:0046872,metal ion binding; GO:0003676,nucleic acid binding; GO:0010588,cotyledon vascular tissue pattern formation; GO:0010305,leaf vascular tissue pattern formation; GO:0010087,phloem or xylem histogenesis; GO:0048364,root development; GO:0048367,shoot system development; GO:0006351,transcription, DNA-templated	PF00096.26:Zinc finger, C2H2 type
Glyma.01G086900	8	Chr01	26202665	26203932	K10525 allene oxide cyclase [EC:5.3.99.6] | (RefSeq) allene oxide cyclase, chloroplastic-like (A)	ko00592: alpha-Linolenic acid metabolism	allene oxide cyclase 4, chloroplastic-like [Glycine max]	RecName: Full=Allene oxide cyclase, chloroplastic {ECO:0000303|Ref.1, ECO:0000303|Ref.2}; Short=OsAOC {ECO:0000303|Ref.1}; EC=5.3.99.6 {ECO:0000269|PubMed:23347338}; AltName: Full=Protein COLEOPTILE PHOTOMORPHOGENESIS 2 {ECO:0000303|PubMed:23347338}; AltName: Full=Protein HEBIBA {ECO:0000303|PubMed:14605232}; Flags: Precursor;	SubName: Full=Allene oxide cyclase 4, chloroplastic {ECO:0000313|EMBL:KHN10797.1}; EC=5.3.99.6 {ECO:0000313|EMBL:KHN10797.1};	--	GO:0009507,chloroplast; GO:0046423,allene-oxide cyclase activity; GO:0009734,auxin-activated signaling pathway; GO:0007623,circadian rhythm; GO:0050832,defense response to fungus; GO:0080186,developmental vegetative growth; GO:0009908,flower development; GO:0009864,induced systemic resistance, jasmonic acid mediated signaling pathway; GO:0009695,jasmonic acid biosynthetic process; GO:0048573,phot…	PF06351.11:Allene oxide cyclase
Glyma.01G087500	9	Chr01	26423047	26424870	K09287 RAV-like factor | (RefSeq) AP2/ERF and B3 domain-containing transcription repressor TEM1-like (A)	--	PREDICTED: AP2/ERF and B3 domain-containing transcription repressor TEM1-like [Glycine max]	RecName: Full=AP2/ERF and B3 domain-containing transcription repressor TEM1; AltName: Full=Protein TEMPRANILLO 1; AltName: Full=RAV1-like ethylene-responsive transcription factor TEM1;	SubName: Full=Uncharacterized protein {ECO:0000313|EMBL:KRH75484.1, ECO:0000313|EnsemblPlants:GLYMA01G22260.1};	--	GO:0005634,nucleus; GO:0003677,DNA binding; GO:0003700,DNA-binding transcription factor activity; GO:0009873,ethylene-activated signaling pathway; GO:0048573,photoperiodism, flowering; GO:0006351,transcription, DNA-templated	PF02362.21:B3 DNA binding domain
Glyma.01G089300	3	Chr01	27014318	27023714	--	--	hypothetical protein GLYMA_01G089300 [Glycine max]	RecName: Full=Protein CHUP1, chloroplastic; AltName: Full=Protein CHLOROPLAST UNUSUAL POSITIONING 1;	SubName: Full=Uncharacterized protein {ECO:0000313|EMBL:KRH75514.1};	--	GO:0009507,chloroplast; GO:0009707,chloroplast outer membrane; GO:0009902,chloroplast relocation	--
Glyma.01G089800	8	Chr01	27170803	27175506	--	--	PREDICTED: clavaminate synthase-like protein At3g21360 [Glycine max]	RecName: Full=Clavaminate synthase-like protein At3g21360; EC=1.-.-.-;	SubName: Full=Uncharacterized protein {ECO:0000313|EMBL:KRH75526.1, ECO:0000313|EnsemblPlants:GLYMA01G22670.1};	--	GO:0005634,nucleus; GO:0046872,metal ion binding; GO:0016491,oxidoreductase activity	PF02668.16:Taurine catabolism dioxygenase TauD, TfdA family
Glyma.01G090200	7	Chr01	27248650	27251480	K19613 leucine-rich repeat protein SHOC2 | (RefSeq) probable LRR receptor-like serine/threonine-protein kinase At1g34110 (A)	--	PREDICTED: piriformospora indica-insensitive protein 2-like [Glycine max]	RecName: Full=Piriformospora indica-insensitive protein 2; Flags: Precursor;	SubName: Full=Piriformospora indica-insensitive protein 2 {ECO:0000313|EMBL:KHN35659.1}; EC=2.7.11.1 {ECO:0000313|EMBL:KHN35659.1};	FOG: Leucine rich repeat	GO:0009507,chloroplast; GO:0005886,plasma membrane; GO:0009610,response to symbiotic fungus; GO:0044403,symbiont process	PF13855.6:Leucine rich repeat
Glyma.01G092300	8	Chr01	27944421	27945794	--	--	hypothetical protein PHAVU_003G024400g [Phaseolus vulgaris]	--	SubName: Full=Uncharacterized protein {ECO:0000313|EMBL:ESW25305.1};	--	--	--
Glyma.01G244800	5	Chr01	56723159	56725021	--	--	PREDICTED: B3 domain-containing protein Os01g0234100 isoform X1 [Glycine max]	RecName: Full=B3 domain-containing protein Os01g0234100;	SubName: Full=Uncharacterized protein {ECO:0000313|EMBL:KRH77968.1, ECO:0000313|EnsemblPlants:GLYMA01G45623.1};	--	GO:0005634,nucleus; GO:0003677,DNA binding; GO:0006355,regulation of transcription, DNA-templated; GO:0006351,transcription, DNA-templated	PF02362.21:B3 DNA binding domain
Glyma.01G095500	8	Chr01	29735304	29737699	K20558 transcription factor SPEECHLESS | (RefSeq) transcription factor SPEECHLESS (A)	ko04016: MAPK signaling pathway - plant	Transcription factor bHLH71 [Glycine soja]	RecName: Full=Transcription factor bHLH96; AltName: Full=Basic helix-loop-helix protein 96; Short=AtbHLH96; Short=bHLH 96; AltName: Full=Transcription factor EN 15; AltName: Full=bHLH transcription factor bHLH096;	SubName: Full=Transcription factor bHLH71 {ECO:0000313|EMBL:KHN45285.1}; EC=1.3.1.74 {ECO:0000313|EMBL:KHN45285.1};	--	GO:0005634,nucleus; GO:0003677,DNA binding; GO:0003700,DNA-binding transcription factor activity; GO:0046983,protein dimerization activity; GO:0006351,transcription, DNA-templated	PF00010.26:Helix-loop-helix DNA-binding domain
Glyma.01G096600	8	Chr01	31363634	31366527	K13422 transcription factor MYC2 | (RefSeq) transcription factor MYC2-like (A)	ko04016: MAPK signaling pathway - plant; ko04075: Plant hormone signal transduction	PREDICTED: transcription factor MYC2-like [Glycine max]	RecName: Full=Transcription factor MYC2; Short=AtMYC2; AltName: Full=Basic helix-loop-helix protein 6; Short=AtbHLH6; Short=bHLH 6; AltName: Full=Protein JASMONATE INSENSITIVE 1; AltName: Full=R-homologous Arabidopsis protein 1; Short=RAP-1; AltName: Full=Transcription factor EN 38; AltName: Full=Z-box binding factor 1 protein; AltName: Full=bHLH transcription factor bHLH006; AltName: Full=rd22BP…	SubName: Full=Uncharacterized protein {ECO:0000313|EMBL:KRH75613.1, ECO:0000313|EnsemblPlants:GLYMA01G12740.1};	--	GO:0005634,nucleus; GO:0003677,DNA binding; GO:0003700,DNA-binding transcription factor activity; GO:0046983,protein dimerization activity; GO:0043565,sequence-specific DNA binding; GO:0009738,abscisic acid-activated signaling pathway; GO:0009963,positive regulation of flavonoid biosynthetic process; GO:0045893,positive regulation of transcription, DNA-templated; GO:2000068,regulation of defense …	PF14215.6:bHLH-MYC and R2R3-MYB transcription factors N-terminal
Glyma.01G097100	10	Chr01	31751464	31755069	K15109 solute carrier family 25 (mitochondrial carnitine/acylcarnitine transporter), member 20/29 | (RefSeq) mitochondrial carnitine/acylcarnitine carrier-like protein (A)	--	uncharacterized protein LOC100791908 [Glycine max]	RecName: Full=Mitochondrial carnitine/acylcarnitine carrier-like protein; AltName: Full=Carnitine/acylcarnitine translocase-like protein; Short=CAC-like protein; AltName: Full=Protein A BOUT DE SOUFFLE;	SubName: Full=Mitochondrial carnitine/acylcarnitine carrier-like protein {ECO:0000313|EMBL:KHN22507.1};	Mitochondrial carnitine-acylcarnitine carrier protein	GO:0009507,chloroplast; GO:0016021,integral component of membrane; GO:0005743,mitochondrial inner membrane; GO:0005739,mitochondrion; GO:0009536,plastid; GO:0000064,L-ornithine transmembrane transporter activity; GO:0000066,NA; GO:0006839,mitochondrial transport	PF00153.27:Mitochondrial carrier protein
Glyma.01G099800	6	Chr01	33261108	33274284	K12657 delta-1-pyrroline-5-carboxylate synthetase [EC:2.7.2.11 1.2.1.41] | (RefSeq) delta-1-pyrroline-5-carboxylate synthase-like isoform X1 (A)	ko00330: Arginine and proline metabolism; ko01230: Biosynthesis of amino acids	PREDICTED: delta-1-pyrroline-5-carboxylate synthase-like isoform X2 [Glycine max]	RecName: Full=Delta-1-pyrroline-5-carboxylate synthase; Short=P5CS; Includes: RecName: Full=Glutamate 5-kinase; Short=GK; EC=2.7.2.11; AltName: Full=Gamma-glutamyl kinase; Includes: RecName: Full=Gamma-glutamyl phosphate reductase; Short=GPR; EC=1.2.1.41; AltName: Full=Glutamate-5-semialdehyde dehydrogenase; AltName: Full=Glutamyl-gamma-semialdehyde dehydrogenase;	RecName: Full=Delta-1-pyrroline-5-carboxylate synthase {ECO:0000256|PIRNR:PIRNR036429}; Includes: RecName: Full=Glutamate 5-kinase {ECO:0000256|PIRNR:PIRNR036429}; Short=GK {ECO:0000256|PIRNR:PIRNR036429}; EC=2.7.2.11 {ECO:0000256|PIRNR:PIRNR036429}; AltName: Full=Gamma-glutamyl kinase {ECO:0000256|PIRNR:PIRNR036429}; Includes: RecName: Full=Gamma-glutamyl phosphate reductase {ECO:0000256|PIRNR:P…	Gamma-glutamyl phosphate reductase	GO:0005737,cytoplasm; GO:0005524,ATP binding; GO:0004349,glutamate 5-kinase activity; GO:0004350,glutamate-5-semialdehyde dehydrogenase activity; GO:0055129,L-proline biosynthetic process	PF00696.28:Amino acid kinase family
Glyma.01G102600	7	Chr01	34164972	34168482	K00002 alcohol dehydrogenase (NADP+) [EC:1.1.1.2] | (RefSeq) NADPH-dependent aldo-keto reductase, chloroplastic-like (A)	ko00010: Glycolysis / Gluconeogenesis; ko00040: Pentose and glucuronate interconversions; ko00561: Glycerolipid metabolism	PREDICTED: aldo-keto reductase family 4 member C9 [Glycine max]	RecName: Full=NADPH-dependent aldo-keto reductase, chloroplastic {ECO:0000303|PubMed:21169366}; Short=AtChlAKR {ECO:0000303|PubMed:21169366}; EC=1.1.1.- {ECO:0000269|PubMed:19616008, ECO:0000269|PubMed:21169366}; AltName: Full=Aldo-keto reductase family 4 member C9;	SubName: Full=Uncharacterized protein {ECO:0000313|EMBL:KRH75702.1, ECO:0000313|EnsemblPlants:GLYMA01G24931.1};	Aldo/keto reductase family proteins	GO:0009507,chloroplast; GO:0008106,alcohol dehydrogenase (NADP+) activity; GO:0004033,aldo-keto reductase (NADP) activity; GO:0070401,NADP+ binding; GO:0016229,steroid dehydrogenase activity; GO:0055114,oxidation-reduction process; GO:0009409,response to cold; GO:0009651,response to salt stress; GO:0009636,response to toxic substance; GO:0009414,response to water deprivation	PF00248.21:Aldo/keto reductase family
Glyma.01G104200	10	Chr01	35104237	35111049	--	--	PREDICTED: BEL1-like homeodomain protein 9 [Glycine max]	RecName: Full=BEL1-like homeodomain protein 9; Short=BEL1-like protein 9; AltName: Full=Protein BELLRINGER; AltName: Full=Protein LARSON; AltName: Full=Protein PENNYWISE; AltName: Full=Protein REPLUMLESS; AltName: Full=Protein VAAMANA;	SubName: Full=BEL1-like homeodomain protein 9 {ECO:0000313|EMBL:KHN04680.1};	Transcription factor MEIS1 and related HOX domain proteins	GO:0005829,cytosol; GO:0005634,nucleus; GO:0003700,DNA-binding transcription factor activity; GO:0043565,sequence-specific DNA binding; GO:0048457,floral whorl morphogenesis; GO:0010154,fruit development; GO:0080006,internode patterning; GO:0010076,maintenance of floral meristem identity; GO:0010077,maintenance of inflorescence meristem identity; GO:0045892,negative regulation of transcription, D…	PF07526.11:Associated with HOX
Glyma.01G104800	10	Chr01	35324716	35327095	--	--	PREDICTED: galactose oxidase-like [Glycine max]	RecName: Full=Aldehyde oxidase GLOX {ECO:0000305}; EC=1.2.3.1 {ECO:0000305}; AltName: Full=Glyoxal oxidase {ECO:0000303|Ref.1}; Short=VpGLOX {ECO:0000303|PubMed:20512385}; Flags: Precursor;	SubName: Full=Uncharacterized protein {ECO:0000313|EMBL:KRH75731.1, ECO:0000313|EnsemblPlants:GLYMA01G25830.1};	--	GO:0005618,cell wall; GO:0005615,extracellular space; GO:0004031,aldehyde oxidase activity; GO:0102797,geranial:oxygen oxidoreductase activity; GO:0102798,heptaldehyde:oxygen oxidoreductase activity; GO:0050832,defense response to fungus	PF07250.11:Glyoxal oxidase N-terminus
Glyma.01G105000	4	Chr01	35390519	35397050	K14638 solute carrier family 15 (peptide/histidine transporter), member 3/4 | (RefSeq) protein NRT1/ PTR FAMILY 5.6-like (A)	--	PREDICTED: protein NRT1/ PTR FAMILY 5.6-like [Glycine max]	RecName: Full=Protein NRT1/ PTR FAMILY 5.7; Short=AtNPF5.7;	SubName: Full=Uncharacterized protein {ECO:0000313|EMBL:KRH75733.1, ECO:0000313|EnsemblPlants:GLYMA01G25890.1};	H+/oligopeptide symporter	GO:0016021,integral component of membrane; GO:0005886,plasma membrane; GO:0022857,transmembrane transporter activity; GO:0006857,oligopeptide transport	PF00854.21:POT family
Glyma.01G105600	1	Chr01	35687686	35690416	--	--	hypothetical protein GLYMA_01G105600 [Glycine max]	--	SubName: Full=Uncharacterized protein {ECO:0000313|EMBL:KRH75743.1, ECO:0000313|EnsemblPlants:GLYMA01G25960.1};	--	--	--
Glyma.01G106000	7	Chr01	35856497	35858671	K00799 glutathione S-transferase [EC:2.5.1.18] | (RefSeq) probable glutathione S-transferase (A)	ko00480: Glutathione metabolism	uncharacterized protein LOC100527381 [Glycine max]	RecName: Full=Probable glutathione S-transferase; EC=2.5.1.18; AltName: Full=G2-4; AltName: Full=Heat shock protein 26A;	SubName: Full=Putative glutathione S-transferase {ECO:0000313|EMBL:KHN06030.1}; EC=2.5.1.18 {ECO:0000313|EMBL:KHN06030.1};	Glutathione S-transferase	GO:0005737,cytoplasm; GO:0004364,glutathione transferase activity; GO:0006749,glutathione metabolic process; GO:0009737,response to abscisic acid; GO:0009733,response to auxin; GO:0009735,response to cytokinin; GO:0009739,response to gibberellin; GO:0009408,response to heat; GO:0010038,response to metal ion; GO:0009407,toxin catabolic process	PF02798.20:Glutathione S-transferase, N-terminal domain
Glyma.01G106100	7	Chr01	35881007	35883036	K00799 glutathione S-transferase [EC:2.5.1.18] | (RefSeq) probable glutathione S-transferase (A)	ko00480: Glutathione metabolism	tau class glutathione S-transferase [Glycine max]	RecName: Full=Probable glutathione S-transferase; EC=2.5.1.18; AltName: Full=G2-4; AltName: Full=Heat shock protein 26A;	SubName: Full=Putative glutathione S-transferase {ECO:0000313|EMBL:KHN06031.1}; EC=2.5.1.18 {ECO:0000313|EMBL:KHN06031.1};	Glutathione S-transferase	GO:0005737,cytoplasm; GO:0004364,glutathione transferase activity; GO:0006749,glutathione metabolic process; GO:0009737,response to abscisic acid; GO:0009733,response to auxin; GO:0009735,response to cytokinin; GO:0009739,response to gibberellin; GO:0009408,response to heat; GO:0010038,response to metal ion; GO:0009407,toxin catabolic process	PF02798.20:Glutathione S-transferase, N-terminal domain
Glyma.01G106300	1	Chr01	35961504	35964818	--	--	hypothetical protein GLYMA_01G106300 [Glycine max]	--	SubName: Full=Uncharacterized protein {ECO:0000313|EMBL:KRH75752.1};	--	GO:0016021,integral component of membrane	--
Glyma.01G106500	1	Chr01	36103010	36105425	--	--	PREDICTED: uncharacterized protein LOC100782156 [Glycine max]	--	SubName: Full=Uncharacterized protein {ECO:0000313|EMBL:KRH75754.1, ECO:0000313|EnsemblPlants:GLYMA01G26340.1};	--	--	--
Glyma.01G108000	7	Chr01	36876801	36881550	K22697 sphingomyelin synthase-related protein 1 | (RefSeq) phosphatidylinositol:ceramide inositolphosphotransferase 1-like (A)	--	PREDICTED: phosphatidylinositol:ceramide inositolphosphotransferase 1 [Glycine max]	RecName: Full=Phosphatidylinositol:ceramide inositolphosphotransferase 1; EC=2.7.8.-; AltName: Full=Inositol-phosphorylceramide synthase 1; Short=AtIPCS1; Short=IPC synthase 1; AltName: Full=Protein ERH1-like2; AltName: Full=Sphingolipid synthase 1;	SubName: Full=Uncharacterized protein {ECO:0000313|EMBL:KRH75771.1, ECO:0000313|EnsemblPlants:GLYMA01G26700.1};	Uncharacterized conserved protein	GO:0016021,integral component of membrane; GO:0005802,trans-Golgi network; GO:0045140,inositol phosphoceramide synthase activity; GO:0030148,sphingolipid biosynthetic process	PF14360.6:PAP2 superfamily C-terminal
Glyma.01G108700	9	Chr01	37019265	37022017	--	--	hypothetical protein glysoja_042216 [Glycine soja]	--	SubName: Full=Uncharacterized protein {ECO:0000313|EMBL:KHN12948.1};	--	--	PF06521.11:PAR1 protein
Glyma.01G109300	7	Chr01	37232123	37235134	K07375 tubulin beta | (RefSeq) tubulin beta-2 chain (A)	ko04145: Phagosome	PREDICTED: tubulin beta-2 chain-like [Glycine max]	RecName: Full=Tubulin beta-2 chain; AltName: Full=Beta-2-tubulin;	RecName: Full=Tubulin beta chain {ECO:0000256|RuleBase:RU000352};	Beta tubulin	GO:0005737,cytoplasm; GO:0005874,microtubule; GO:0005525,GTP binding; GO:0003924,GTPase activity; GO:0005200,structural constituent of cytoskeleton; GO:0007017,microtubule-based process	PF00091.25:Tubulin/FtsZ family, GTPase domain
Glyma.02G001800	5	Chr02	230423	231381	--	--	PREDICTED: RNA-binding protein 12-like [Glycine max]	--	SubName: Full=Uncharacterized protein {ECO:0000313|EMBL:KRH69066.1, ECO:0000313|EnsemblPlants:GLYMA02G00415.1};	--	--	--
Glyma.01G109600	12	Chr01	37330257	37332531	--	--	PREDICTED: protein transport protein yos1-like isoform X1 [Glycine max]	--	SubName: Full=Uncharacterized protein {ECO:0000313|EMBL:KRH75790.1, ECO:0000313|EnsemblPlants:GLYMA01G26981.1};	--	GO:0030134,COPII-coated ER to Golgi transport vesicle; GO:0005789,endoplasmic reticulum membrane; GO:0030173,integral component of Golgi membrane; GO:0006888,ER to Golgi vesicle-mediated transport	PF08571.10:Yos1-like
Glyma.01G110100	3	Chr01	37387652	37391616	K01593 aromatic-L-amino-acid/L-tryptophan decarboxylase [EC:4.1.1.28 4.1.1.105] | (RefSeq) tyrosine/DOPA decarboxylase (A)	ko00350: Tyrosine metabolism; ko00360: Phenylalanine metabolism; ko00380: Tryptophan metabolism; ko00901: Indole alkaloid biosynthesis; ko00950: Isoquinoline alkaloid biosynthesis; ko00965: Betalain biosynthesis	PREDICTED: uncharacterized protein LOC100819920 [Glycine max]	--	SubName: Full=Uncharacterized protein {ECO:0000313|EMBL:KRH75796.1, ECO:0000313|EnsemblPlants:GLYMA01G27040.1};	--	--	PF05056.12:Protein of unknown function (DUF674)
Glyma.01G110400	8	Chr01	37512942	37517508	K15103 solute carrier family 25 (mitochondrial uncoupling protein), member 8/9 | (RefSeq) mitochondrial uncoupling protein 1-like (A)	--	PREDICTED: mitochondrial uncoupling protein 1-like [Glycine max]	RecName: Full=Mitochondrial uncoupling protein 1; Short=AtPUMP1;	SubName: Full=Uncharacterized protein {ECO:0000313|EMBL:KRH75799.1, ECO:0000313|EnsemblPlants:GLYMA01G27120.2};	Mitochondrial fatty acid anion carrier protein/Uncoupling protein	GO:0009507,chloroplast; GO:0016021,integral component of membrane; GO:0005743,mitochondrial inner membrane; GO:0005739,mitochondrion; GO:0009506,plasmodesma; GO:0005774,vacuolar membrane; GO:0017077,oxidative phosphorylation uncoupler activity; GO:1990542,mitochondrial transmembrane transport; GO:0006839,mitochondrial transport; GO:0009853,photorespiration	PF00153.27:Mitochondrial carrier protein
Glyma.01G110500	10	Chr01	37527681	37530872	K20723 reticulon-3 | (RefSeq) reticulon-like protein B12 (A)	--	PREDICTED: reticulon-like protein B12 [Glycine max]	RecName: Full=Reticulon-like protein B12; Short=AtRTNLB12;	RecName: Full=Reticulon-like protein {ECO:0000256|RuleBase:RU363132};	Reticulon	GO:0005789,endoplasmic reticulum membrane; GO:0016021,integral component of membrane	PF02453.17:Reticulon
Glyma.01G110900	1	Chr01	37611838	37616931	K11863 Ataxin-3 [EC:3.4.22.-] | (RefSeq) ataxin-3 homolog (A)	ko04141: Protein processing in endoplasmic reticulum	PREDICTED: ataxin-3 homolog [Glycine max]	RecName: Full=Ataxin-3 homolog; EC=3.4.19.12; AltName: Full=MJD1a-like; AltName: Full=Machado-Joseph disease-like protein;	SubName: Full=Ataxin-3 like {ECO:0000313|EMBL:KHN26235.1}; EC=3.4.22.- {ECO:0000313|EMBL:KHN26235.1};	Ataxin 3/Josephin	GO:0005634,nucleus; GO:0004843,thiol-dependent ubiquitin-specific protease activity; GO:0016579,protein deubiquitination; GO:0006355,regulation of transcription, DNA-templated; GO:0006351,transcription, DNA-templated	PF02099.17:Josephin
Glyma.02G005700	5	Chr02	625965	630724	K12119 cryptochrome 2 | (RefSeq) GMCRY2B; cryptochrome-2-like (A)	ko04712: Circadian rhythm - plant	cryptochrome-2-like [Glycine max]	RecName: Full=Cryptochrome-2 {ECO:0000303|Ref.2}; Short=Atcry2 {ECO:0000303|Ref.2}; AltName: Full=Blue light photoreceptor {ECO:0000303|PubMed:9003312}; AltName: Full=Protein PHR homolog 1 {ECO:0000303|PubMed:9003312}; Short=AtPHH1 {ECO:0000303|PubMed:9003312}; AltName: Full=Protein SUPPRESSOR OF elf3 20 {ECO:0000303|PubMed:21296763};	SubName: Full=Cryptochrome2 {ECO:0000313|EMBL:BAI47557.1};	Deoxyribodipyrimidine photolyase/cryptochrome	GO:0005737,cytoplasm; GO:0016604,nuclear body; GO:0005634,nucleus; GO:0016605,PML body; GO:0005773,vacuole; GO:0005524,ATP binding; GO:0009882,blue light photoreceptor activity; GO:0071949,FAD binding; GO:0042802,identical protein binding; GO:0046872,metal ion binding; GO:0009785,blue light signaling pathway; GO:0006325,chromatin organization; GO:0006338,chromatin remodeling; GO:0010617,circadian…	PF03441.14:FAD binding domain of DNA photolyase
Glyma.01G112600	10	Chr01	38353594	38358163	K05909 laccase [EC:1.10.3.2] | (RefSeq) laccase-4-like (A)	--	PREDICTED: laccase-4-like [Glycine max]	RecName: Full=Laccase-4; EC=1.10.3.2; AltName: Full=Benzenediol:oxygen oxidoreductase 4; AltName: Full=Diphenol oxidase 4; AltName: Full=Protein IRREGULAR XYLEM 12; AltName: Full=Urishiol oxidase 4; Flags: Precursor;	RecName: Full=Laccase {ECO:0000256|RuleBase:RU361119}; EC=1.10.3.2 {ECO:0000256|RuleBase:RU361119}; AltName: Full=Benzenediol:oxygen oxidoreductase {ECO:0000256|RuleBase:RU361119}; AltName: Full=Diphenol oxidase {ECO:0000256|RuleBase:RU361119}; AltName: Full=Urishiol oxidase {ECO:0000256|RuleBase:RU361119};	Multicopper oxidases	GO:0048046,apoplast; GO:0005507,copper ion binding; GO:0052716,hydroquinone:oxygen oxidoreductase activity; GO:0016491,oxidoreductase activity; GO:0016722,oxidoreductase activity, oxidizing metal ions; GO:0009809,lignin biosynthetic process; GO:0046274,lignin catabolic process; GO:0009834,plant-type secondary cell wall biogenesis	PF00394.22:Multicopper oxidase
Glyma.02G006700	5	Chr02	707464	708318	--	--	hypothetical protein glysoja_022855 [Glycine soja]	--	SubName: Full=Uncharacterized protein {ECO:0000313|EMBL:KRH69135.1};	--	--	--
Glyma.02G009400	5	Chr02	922172	923187	--	--	NPR1 interacting domain-containing protein [Glycine max]	--	SubName: Full=Uncharacterized protein {ECO:0000313|EMBL:ACU17012.1, ECO:0000313|EnsemblPlants:GLYMA02G01240.1};	--	GO:0010112,regulation of systemic acquired resistance	PF15699.5:NPR1 interacting
Glyma.01G113200	10	Chr01	38755065	38758956	K13508 glycerol-3-phosphate acyltransferase [EC:2.3.1.15 2.3.1.198] | (RefSeq) glycerol-3-phosphate 2-O-acyltransferase 6-like (A)	ko00561: Glycerolipid metabolism; ko00564: Glycerophospholipid metabolism	PREDICTED: glycerol-3-phosphate 2-O-acyltransferase 6-like [Glycine max]	RecName: Full=Glycerol-3-phosphate 2-O-acyltransferase 6; Short=AtGPAT6; EC=2.3.1.198; AltName: Full=Glycerol-3-phosphate acyltransferase 6;	SubName: Full=Uncharacterized protein {ECO:0000313|EMBL:KRH75836.1, ECO:0000313|EnsemblPlants:GLYMA01G27900.1};	--	GO:0016021,integral component of membrane; GO:0016020,membrane; GO:0090447,glycerol-3-phosphate 2-O-acyltransferase activity; GO:0016791,phosphatase activity; GO:0102419,sn-2-glycerol-3-phosphate omega-OH-C22:0-CoA acyl transferase activity; GO:0010143,cutin biosynthetic process; GO:0009908,flower development; GO:0008654,phospholipid biosynthetic process	PF12710.7:haloacid dehalogenase-like hydrolase
Glyma.01G115000	3	Chr01	39765884	39768819	K22267 starch-binding domain-containing protein 1 | (RefSeq) predicted protein (A)	--	PREDICTED: uncharacterized protein LOC100784126 isoform X1 [Glycine max]	RecName: Full=Phosphoglucan, water dikinase, chloroplastic; EC=2.7.9.5; Flags: Precursor;	SubName: Full=Uncharacterized protein {ECO:0000313|EMBL:KRH75861.1, ECO:0000313|EnsemblPlants:GLYMA01G28520.1};	--	GO:0009507,chloroplast; GO:0009570,chloroplast stroma; GO:0009536,plastid; GO:0102217,6-phosphoglucan, water dikinase activity; GO:0005524,ATP binding; GO:0019200,carbohydrate kinase activity; GO:0046872,metal ion binding; GO:0051752,phosphoglucan, water dikinase activity; GO:2001070,starch binding; GO:0046777,protein autophosphorylation; GO:0005983,starch catabolic process; GO:0005982,starch met…	PF00686.19:Starch binding domain
Glyma.01G115600	2	Chr01	39989695	39991769	--	--	PREDICTED: UPF0481 protein At3g47200-like [Glycine max]	RecName: Full=UPF0481 protein At3g47200;	SubName: Full=Uncharacterized protein {ECO:0000313|EMBL:KRH75871.1, ECO:0000313|EnsemblPlants:GLYMA01G28780.1};	--	GO:0016021,integral component of membrane; GO:0005886,plasma membrane	PF03140.15:Plant protein of unknown function
Glyma.01G115900	9	Chr01	40072016	40074796	K08915 light-harvesting complex II chlorophyll a/b binding protein 4 | (RefSeq) chlorophyll a-b binding protein CP29.2, chloroplastic-like (A)	ko00196: Photosynthesis - antenna proteins	PREDICTED: chlorophyll a-b binding protein CP29.2, chloroplastic-like [Glycine max]	RecName: Full=Chlorophyll a-b binding protein CP29.2, chloroplastic; AltName: Full=LHCB4.2; AltName: Full=LHCII protein 4.2; Flags: Precursor;	RecName: Full=Chlorophyll a-b binding protein, chloroplastic {ECO:0000256|RuleBase:RU363080};	--	GO:0009507,chloroplast; GO:0009941,chloroplast envelope; GO:0009534,chloroplast thylakoid; GO:0009535,chloroplast thylakoid membrane; GO:0016021,integral component of membrane; GO:0016020,membrane; GO:0009522,photosystem I; GO:0009523,photosystem II; GO:0010287,plastoglobule; GO:0009579,thylakoid; GO:0016168,chlorophyll binding; GO:0046872,metal ion binding; GO:0031409,pigment binding; GO:0009768…	PF00504.21:Chlorophyll A-B binding protein
Glyma.01G118000	1	Chr01	40666204	40668587	K01568 pyruvate decarboxylase [EC:4.1.1.1] | (RefSeq) pyruvate decarboxylase 2-like (A)	ko00010: Glycolysis / Gluconeogenesis	PREDICTED: pyruvate decarboxylase 2 [Glycine max]	RecName: Full=Pyruvate decarboxylase 4; Short=AtPDC4; EC=4.1.1.1;	SubName: Full=Uncharacterized protein {ECO:0000313|EMBL:KRH75923.1, ECO:0000313|EnsemblPlants:GLYMA01G29190.1};	Thiamine pyrophosphate-requiring enzyme	GO:0005622,intracellular; GO:0016831,carboxy-lyase activity; GO:0000287,magnesium ion binding; GO:0004737,pyruvate decarboxylase activity; GO:0030976,thiamine pyrophosphate binding	PF02776.18:Thiamine pyrophosphate enzyme, N-terminal TPP binding domain
Glyma.01G118900	10	Chr01	40860149	40891062	K13430 serine/threonine-protein kinase PBS1 [EC:2.7.11.1] | (RefSeq) serine/threonine-protein kinase PBS1 (A)	ko04626: Plant-pathogen interaction	PREDICTED: probable leucine-rich repeat receptor-like serine/threonine-protein kinase At3g14840 [Glycine max]	RecName: Full=Probable leucine-rich repeat receptor-like serine/threonine-protein kinase At3g14840; EC=2.7.11.1; Flags: Precursor;	SubName: Full=Uncharacterized protein {ECO:0000313|EMBL:KRH75939.1, ECO:0000313|EnsemblPlants:GLYMA01G29378.1};	--	GO:0016021,integral component of membrane; GO:0005886,plasma membrane; GO:0009506,plasmodesma; GO:0005524,ATP binding; GO:0004674,protein serine/threonine kinase activity; GO:0009861,jasmonic acid and ethylene-dependent systemic resistance; GO:0045088,regulation of innate immune response	PF00069.25:Protein kinase domain
Glyma.01G119400	8	Chr01	40972234	40977414	K01265 methionyl aminopeptidase [EC:3.4.11.18] | (RefSeq) methionine aminopeptidase 2A (A)	--	PREDICTED: ERBB-3 BINDING PROTEIN 1 [Glycine max]	RecName: Full=ERBB-3 BINDING PROTEIN 1 {ECO:0000303|PubMed:17024182}; Short=StEBP1 {ECO:0000303|PubMed:17024182};	SubName: Full=Uncharacterized protein {ECO:0000313|EMBL:KRH75946.1, ECO:0000313|EnsemblPlants:GLYMA01G29420.1};	Metallopeptidase	GO:0030529,NA; GO:0005634,nucleus; GO:0003723,RNA binding; GO:0009734,auxin-activated signaling pathway; GO:0044843,cell cycle G1/S phase transition; GO:0007275,multicellular organism development; GO:0051302,regulation of cell division; GO:0001558,regulation of cell growth; GO:0006364,rRNA processing	PF00557.24:Metallopeptidase family M24
Glyma.01G119500	1	Chr01	41160040	41170441	K01490 AMP deaminase [EC:3.5.4.6] | (RefSeq) AMP deaminase-like (A)	ko00230: Purine metabolism	PREDICTED: AMP deaminase-like [Glycine max]	RecName: Full=AMP deaminase {ECO:0000303|PubMed:15918887}; Short=AtAMPD {ECO:0000303|PubMed:15918887}; EC=3.5.4.6 {ECO:0000305}; AltName: Full=Protein EMBRYONIC FACTOR 1 {ECO:0000303|PubMed:15918887};	SubName: Full=Uncharacterized protein {ECO:0000313|EMBL:KRH75947.1, ECO:0000313|EnsemblPlants:GLYMA01G29470.3};	Adenosine monophosphate deaminase	GO:0005829,cytosol; GO:0005783,endoplasmic reticulum; GO:0031307,integral component of mitochondrial outer membrane; GO:0043231,intracellular membrane-bounded organelle; GO:0005634,nucleus; GO:0003876,AMP deaminase activity; GO:0005524,ATP binding; GO:0046872,metal ion binding; GO:0043424,protein histidine kinase binding; GO:0009793,embryo development ending in seed dormancy; GO:0032264,IMP salva…	PF00962.22:Adenosine/AMP deaminase
Glyma.01G120800	12	Chr01	41380696	41382891	--	--	PREDICTED: uncharacterized protein LOC102668485 [Glycine max]	--	SubName: Full=Uncharacterized protein {ECO:0000313|EMBL:KRH75963.1, ECO:0000313|EnsemblPlants:GLYMA01G29670.1};	--	--	PF14383.6:DUF761-associated sequence motif
Glyma.01G121400	7	Chr01	41808055	41828625	K06100 symplekin | (RefSeq) uncharacterized protein LOC114416204 isoform X1 (A)	ko03015: mRNA surveillance pathway	PREDICTED: uncharacterized protein LOC100776979 isoform X2 [Glycine max]	--	SubName: Full=Uncharacterized protein {ECO:0000313|EMBL:KRH75969.1, ECO:0000313|EnsemblPlants:GLYMA01G30320.2};	mRNA cleavage and polyadenylation factor II complex, subunit PTA1	GO:0016021,integral component of membrane	PF12295.8:Symplekin tight junction protein C terminal
Glyma.01G121700	9	Chr01	41857267	41859157	K22547 arsenate reductase [EC:1.20.4.1] | (RefSeq) protein HIGH ARSENIC CONTENT 1, mitochondrial (A)	--	rhodanese-like domain-containing protein 10 [Glycine max]	RecName: Full=Rhodanese-like domain-containing protein 10; AltName: Full=Sulfurtransferase 10; Short=AtStr10;	SubName: Full=Uncharacterized protein {ECO:0000313|EMBL:KHN35576.1};	--	GO:0009507,chloroplast; GO:0009941,chloroplast envelope; GO:0009534,chloroplast thylakoid; GO:0016021,integral component of membrane; GO:0009409,response to cold	PF00581.20:Rhodanese-like domain
Glyma.01G122000	4	Chr01	41905974	41909844	K23978 isoamyl acetate esterase [EC:3.1.1.112] | (RefSeq) GDSL esterase/lipase CPRD49-like (A)	--	PREDICTED: GDSL esterase/lipase CPRD49-like [Glycine max]	RecName: Full=GDSL esterase/lipase CPRD49; EC=3.1.1.-; AltName: Full=Extracellular lipase CPRD49; Flags: Precursor;	SubName: Full=GDSL esterase/lipase CPRD49 {ECO:0000313|EMBL:KHN35578.1}; EC=3.1.-.- {ECO:0000313|EMBL:KHN35578.1};	Isoamyl acetate-hydrolyzing esterase	GO:0048046,apoplast; GO:0016787,hydrolase activity; GO:0016042,lipid catabolic process	PF13472.6:GDSL-like Lipase/Acylhydrolase family
Glyma.01G122800	1	Chr01	42259238	42263866	K07300 Ca2+:H+ antiporter | (RefSeq) vacuolar cation/proton exchanger 3-like isoform X1 (A)	--	PREDICTED: vacuolar cation/proton exchanger 3-like isoform X1 [Glycine max]	RecName: Full=Vacuolar cation/proton exchanger 3; AltName: Full=Ca(2+)/H(+) antiporter CAX3; AltName: Full=Ca(2+)/H(+) exchanger 3; AltName: Full=Protein CATION EXCHANGER 3;	SubName: Full=Uncharacterized protein {ECO:0000313|EMBL:KRH75989.1, ECO:0000313|EnsemblPlants:GLYMA01G30610.1};	Ca2+/H+ antiporter VCX1 and related proteins	GO:0016021,integral component of membrane; GO:0009705,plant-type vacuole membrane; GO:0005774,vacuolar membrane; GO:0005773,vacuole; GO:0015369,calcium:proton antiporter activity; GO:0006874,cellular calcium ion homeostasis; GO:0030026,cellular manganese ion homeostasis; GO:0006882,cellular zinc ion homeostasis; GO:0055062,phosphate ion homeostasis; GO:0006793,phosphorus metabolic process; GO:005…	PF01699.24:Sodium/calcium exchanger protein
Glyma.02G013100	5	Chr02	1180118	1183987	--	--	PREDICTED: universal stress protein A-like protein [Glycine max]	RecName: Full=Universal stress protein A-like protein;	SubName: Full=Universal stress protein A-like protein {ECO:0000313|EMBL:KHN08643.1};	--	GO:0005886,plasma membrane; GO:0016208,AMP binding; GO:0006950,response to stress	PF00582.26:Universal stress protein family
Glyma.01G123500	9	Chr01	42557525	42558274	--	--	hypothetical protein glysoja_045552 [Glycine soja]	--	SubName: Full=Uncharacterized protein {ECO:0000313|EMBL:KHN48911.1};	--	GO:0016021,integral component of membrane	--
Glyma.01G124300	12	Chr01	42917222	42920150	K02987 small subunit ribosomal protein S4e | (RefSeq) 40S ribosomal protein S4-like (A)	ko03010: Ribosome	PREDICTED: 40S ribosomal protein S4 [Glycine max]	RecName: Full=40S ribosomal protein S4;	RecName: Full=40S ribosomal protein S4 {ECO:0000256|PIRNR:PIRNR002116};	40S ribosomal protein S4	GO:0005840,ribosome; GO:0019843,rRNA binding; GO:0003735,structural constituent of ribosome; GO:0006412,translation	PF00900.20:Ribosomal family S4e
Glyma.02G015300	5	Chr02	1356731	1359829	K20893 probable galacturonosyltransferase-like 1 [EC:2.4.1.-] | (RefSeq) probable galacturonosyltransferase-like 1 (A)	--	PREDICTED: probable galacturonosyltransferase-like 7 [Glycine max]	RecName: Full=Probable galacturonosyltransferase-like 7; EC=2.4.1.-;	RecName: Full=Hexosyltransferase {ECO:0000256|RuleBase:RU362027}; EC=2.4.1.- {ECO:0000256|RuleBase:RU362027};	--	GO:0005794,Golgi apparatus; GO:0000139,Golgi membrane; GO:0016021,integral component of membrane; GO:0047262,polygalacturonate 4-alpha-galacturonosyltransferase activity; GO:0016757,transferase activity, transferring glycosyl groups; GO:0071555,cell wall organization; GO:0045489,pectin biosynthetic process; GO:0000271,polysaccharide biosynthetic process	PF01501.20:Glycosyl transferase family 8
Glyma.01G124700	2	Chr01	43008183	43010029	K14496 abscisic acid receptor PYR/PYL family | (RefSeq) abscisic acid receptor PYL4-like (A)	ko04016: MAPK signaling pathway - plant; ko04075: Plant hormone signal transduction	PREDICTED: abscisic acid receptor PYL4-like [Glycine max]	RecName: Full=Abscisic acid receptor PYL4; AltName: Full=ABI1-binding protein 2; AltName: Full=PYR1-like protein 4; AltName: Full=Regulatory components of ABA receptor 10;	SubName: Full=Uncharacterized protein {ECO:0000313|EMBL:KRH76014.1, ECO:0000313|EnsemblPlants:GLYMA01G31320.1};	--	GO:0005737,cytoplasm; GO:0005634,nucleus; GO:0005886,plasma membrane; GO:0010427,abscisic acid binding; GO:0042803,protein homodimerization activity; GO:0004864,protein phosphatase inhibitor activity; GO:0004872,NA; GO:0009738,abscisic acid-activated signaling pathway	PF10604.9:Polyketide cyclase / dehydrase and lipid transport
Glyma.01G125800	7	Chr01	43453101	43457005	K20359 PRA1 family protein 1 | (RefSeq) hypothetical protein (A)	--	PREDICTED: probably inactive leucine-rich repeat receptor-like protein kinase IMK2 [Glycine max]	RecName: Full=Probably inactive leucine-rich repeat receptor-like protein kinase IMK2; AltName: Full=Protein INFLORESCENCE MERISTEM RECEPTOR-LIKE KINASE 2; Flags: Precursor;	SubName: Full=Uncharacterized protein {ECO:0000313|EMBL:KRH76031.1, ECO:0000313|EnsemblPlants:GLYMA01G31590.1};	--	GO:0005618,cell wall; GO:0016021,integral component of membrane; GO:0009505,plant-type cell wall; GO:0005886,plasma membrane; GO:0009506,plasmodesma; GO:0005524,ATP binding; GO:0004672,protein kinase activity	PF07714.17:Protein tyrosine kinase
Glyma.02G018700	5	Chr02	1608638	1614322	K19964 hydroxyisourate hydrolase [EC:3.5.2.17] | (RefSeq) hydroxyisourate hydrolase isoform X1 (A)	ko00230: Purine metabolism	hydroxyisourate hydrolase precursor [Glycine max]	RecName: Full=Hydroxyisourate hydrolase; Short=HIU hydrolase; Short=HIUHase; EC=3.5.2.17; Flags: Precursor;	SubName: Full=Uncharacterized protein {ECO:0000313|EMBL:KRH69300.1, ECO:0000313|EnsemblPlants:GLYMA02G02230.3};	Beta-glucosidase, lactase phlorizinhydrolase, and related proteins	GO:0016021,integral component of membrane; GO:0005778,peroxisomal membrane; GO:0008422,beta-glucosidase activity; GO:0033971,hydroxyisourate hydrolase activity; GO:0005975,carbohydrate metabolic process; GO:1901657,glycosyl compound metabolic process; GO:0006144,purine nucleobase metabolic process; GO:0019628,urate catabolic process	PF00232.18:Glycosyl hydrolase family 1
Glyma.01G126000	9	Chr01	43477322	43480661	K07253 phenylpyruvate tautomerase [EC:5.3.2.1] | (RefSeq) macrophage migration inhibitory factor homolog (A)	ko00350: Tyrosine metabolism; ko00360: Phenylalanine metabolism	PREDICTED: macrophage migration inhibitory factor homolog [Glycine max]	--	SubName: Full=Macrophage migration inhibitory factor like {ECO:0000313|EMBL:KHN19164.1}; EC=5.3.2.1 {ECO:0000313|EMBL:KHN19164.1};	Macrophage migration inhibitory factor	GO:0050178,phenylpyruvate tautomerase activity	PF01187.18:Macrophage migration inhibitory factor (MIF)
Glyma.02G019400	5	Chr02	1724231	1728189	K15275 solute carrier family 35 (UDP-galactose transporter), member B1 | (RefSeq) UDP-galactose/UDP-glucose transporter 3-like (A)	--	PREDICTED: UDP-galactose/UDP-glucose transporter 3 [Glycine max]	RecName: Full=UDP-galactose/UDP-glucose transporter 3 {ECO:0000303|PubMed:12042319}; Short=AtUTr3 {ECO:0000303|PubMed:12042319};	SubName: Full=Uncharacterized protein {ECO:0000313|EMBL:KRH69315.1, ECO:0000313|EnsemblPlants:GLYMA02G02330.1};	UDP-galactose transporter related protein	GO:0030176,integral component of endoplasmic reticulum membrane; GO:0030173,integral component of Golgi membrane; GO:0015297,antiporter activity; GO:0005459,UDP-galactose transmembrane transporter activity; GO:0005460,UDP-glucose transmembrane transporter activity; GO:0008643,carbohydrate transport; GO:0009553,embryo sac development; GO:0030968,endoplasmic reticulum unfolded protein response; GO:…	PF08449.11:UAA transporter family
Glyma.02G020200	5	Chr02	1833300	1836626	--	--	PREDICTED: SNF1-related protein kinase regulatory subunit gamma-1-like isoform X1 [Glycine max]	RecName: Full=SNF1-related protein kinase regulatory subunit gamma-1-like; AltName: Full=AKIN subunit gamma-1-like; AltName: Full=CBS domain-containing protein CBSCBS2;	SubName: Full=Uncharacterized protein {ECO:0000313|EMBL:KRH69332.1, ECO:0000313|EnsemblPlants:GLYMA02G02420.1};	5'-AMP-activated protein kinase, gamma subunit	GO:0005975,carbohydrate metabolic process	PF00571.28:CBS domain
Glyma.01G128300	12	Chr01	44081275	44088461	K14685 solute carrier family 40 (iron-regulated transporter), member 1 | (RefSeq) solute carrier family 40 member 1-like (A)	--	PREDICTED: solute carrier family 40 member 1-like [Glycine max]	RecName: Full=Solute carrier family 40 member 1; AltName: Full=Ferroportin-1; AltName: Full=Iron-regulated transporter 1; Short=AtIREG1;	SubName: Full=Uncharacterized protein {ECO:0000313|EMBL:KRH76060.1, ECO:0000313|EnsemblPlants:GLYMA01G31940.2};	Iron transporter	GO:0016021,integral component of membrane; GO:0005886,plasma membrane; GO:0005381,iron ion transmembrane transporter activity; GO:0006824,cobalt ion transport	PF06963.12:Ferroportin1 (FPN1)
Glyma.01G129400	6	Chr01	44326500	44333319	K00827 alanine-glyoxylate transaminase / (R)-3-amino-2-methylpropionate-pyruvate transaminase [EC:2.6.1.44 2.6.1.40] | (RefSeq) alanine--glyoxylate aminotransferase 2 homolog 2, mitochondrial-like (A)	ko00250: Alanine, aspartate and glutamate metabolism; ko00260: Glycine, serine and threonine metabolism; ko00270: Cysteine and methionine metabolism; ko00280: Valine, leucine and isoleucine degradation	PREDICTED: alanine--glyoxylate aminotransferase 2 homolog 2, mitochondrial [Glycine max]	RecName: Full=Alanine--glyoxylate aminotransferase 2 homolog 3, mitochondrial; EC=2.6.1.44; AltName: Full=Beta-alanine-pyruvate aminotransferase 3; Flags: Precursor;	SubName: Full=Uncharacterized protein {ECO:0000313|EMBL:KRH76075.1, ECO:0000313|EnsemblPlants:GLYMA01G32090.1};	Alanine-glyoxylate aminotransferase AGT2	GO:0005739,mitochondrion; GO:0008453,alanine-glyoxylate transaminase activity; GO:0042802,identical protein binding; GO:0030170,pyridoxal phosphate binding; GO:0043562,cellular response to nitrogen levels; GO:0009853,photorespiration	PF00202.21:Aminotransferase class-III
Glyma.01G129700	1	Chr01	44419085	44420280	--	--	uncharacterized protein LOC100500546 [Glycine max]	RecName: Full=Transcription factor SCREAM2; AltName: Full=Basic helix-loop-helix protein 33; Short=AtbHLH33; Short=bHLH 33; AltName: Full=Transcription factor EN 44; AltName: Full=bHLH transcription factor bHLH033;	SubName: Full=Transcription factor SCREAM2 {ECO:0000313|EMBL:KHN44833.1};	--	GO:0005634,nucleus; GO:0003677,DNA binding; GO:0003700,DNA-binding transcription factor activity; GO:0046983,protein dimerization activity; GO:0010444,guard mother cell differentiation; GO:0006355,regulation of transcription, DNA-templated; GO:0050826,response to freezing; GO:0006351,transcription, DNA-templated	--
Glyma.01G130000	4	Chr01	44436185	44440093	--	--	PREDICTED: non-specific lipid-transfer protein 1-like isoform X2 [Glycine max]	RecName: Full=Non-specific lipid-transfer protein; Short=LTP; AltName: Allergen=Mal d 3; Flags: Precursor;	RecName: Full=Non-specific lipid-transfer protein {ECO:0000256|RuleBase:RU000628};	--	GO:0008289,lipid binding; GO:0006869,lipid transport	PF00234.22:Protease inhibitor/seed storage/LTP family
Glyma.02G032500	5	Chr02	2971305	2974840	K17500 integrin-linked kinase-associated serine/threonine phosphatase 2C [EC:3.1.3.16] | (RefSeq) WAT1-related protein At3g18200 isoform X1 (A)	--	PREDICTED: WAT1-related protein At5g40210-like [Glycine max]	RecName: Full=WAT1-related protein At5g40210;	RecName: Full=WAT1-related protein {ECO:0000256|RuleBase:RU363077};	--	GO:0016021,integral component of membrane; GO:0005886,plasma membrane; GO:0022857,transmembrane transporter activity	PF00892.20:EamA-like transporter family
Glyma.01G131400	2	Chr01	44778556	44783878	K12382 saposin | (RefSeq) uncharacterized LOC100527899 (A)	ko00600: Sphingolipid metabolism	saposin B domain-containing protein precursor [Glycine max]	--	SubName: Full=Proactivator polypeptide {ECO:0000313|EMBL:KHN14264.1};	Prosaposin	GO:0006629,lipid metabolic process	PF03489.17:Saposin-like type B, region 2
Glyma.01G131500	7	Chr01	44789012	44792912	K07198 5'-AMP-activated protein kinase, catalytic alpha subunit [EC:2.7.11.11] | (RefSeq) CBL-interacting protein kinase 2-like (A)	--	PREDICTED: CBL-interacting protein kinase 2-like [Glycine max]	RecName: Full=CBL-interacting protein kinase 2; EC=2.7.11.1; AltName: Full=OsCIPK02;	RecName: Full=Non-specific serine/threonine protein kinase {ECO:0000256|SAAS:SAAS00351747}; EC=2.7.11.1 {ECO:0000256|SAAS:SAAS00351747};	Serine/threonine protein kinase	GO:0005622,intracellular; GO:0005524,ATP binding; GO:0004674,protein serine/threonine kinase activity; GO:0035556,intracellular signal transduction; GO:0018105,peptidyl-serine phosphorylation; GO:0018107,peptidyl-threonine phosphorylation	PF00069.25:Protein kinase domain
Glyma.01G131900	10	Chr01	44855862	44857831	K01870 isoleucyl-tRNA synthetase [EC:6.1.1.5] | (RefSeq) hypothetical protein (A)	ko00970: Aminoacyl-tRNA biosynthesis	PREDICTED: transcription repressor OFP3-like [Glycine max]	RecName: Full=Transcription repressor OFP2; AltName: Full=Ovate family protein 2; Short=AtOFP2;	SubName: Full=Uncharacterized protein {ECO:0000313|EMBL:KHN14261.1};	--	GO:0005634,nucleus; GO:0003677,DNA binding; GO:0045892,negative regulation of transcription, DNA-templated; GO:0006351,transcription, DNA-templated	PF04844.13:Transcriptional repressor, ovate
Glyma.01G132000	10	Chr01	44901718	44908220	K08867 WNK lysine deficient protein kinase [EC:2.7.11.1] | (RefSeq) probable serine/threonine-protein kinase WNK5 isoform X1 (A)	--	PREDICTED: probable serine/threonine-protein kinase WNK5 isoform X1 [Glycine max]	RecName: Full=Probable serine/threonine-protein kinase WNK5; Short=AtWNK5; EC=2.7.11.1; AltName: Full=Protein kinase with no lysine 5;	SubName: Full=Uncharacterized protein {ECO:0000313|EMBL:KRH76107.1, ECO:0000313|EnsemblPlants:GLYMA01G32450.2};	Serine/threonine protein kinase	GO:0005829,cytosol; GO:0005524,ATP binding; GO:0043424,protein histidine kinase binding; GO:0004672,protein kinase activity; GO:0004674,protein serine/threonine kinase activity; GO:0035556,intracellular signal transduction; GO:0048573,photoperiodism, flowering; GO:0006468,protein phosphorylation	PF00069.25:Protein kinase domain
Glyma.01G132500	9	Chr01	45184862	45186419	--	--	AAI_LTSS superfamily protein precursor [Glycine max]	RecName: Full=Non-specific lipid-transfer protein 1; Short=LTP1; Flags: Precursor;	RecName: Full=Non-specific lipid-transfer protein {ECO:0000256|RuleBase:RU000628};	--	GO:0008289,lipid binding; GO:0006869,lipid transport	PF00234.22:Protease inhibitor/seed storage/LTP family
Glyma.01G132600	1	Chr01	45213404	45215069	--	--	uncharacterized protein LOC100499726 precursor [Glycine max]	RecName: Full=Non-specific lipid-transfer protein 3; Short=LTP 3; Flags: Precursor;	RecName: Full=Non-specific lipid-transfer protein {ECO:0000256|RuleBase:RU000628};	--	GO:0008289,lipid binding; GO:0006869,lipid transport	PF00234.22:Protease inhibitor/seed storage/LTP family
Glyma.01G133400	3	Chr01	45359225	45360838	K09481 protein transport protein SEC61 subunit beta | (RefSeq) protein transport protein Sec61 subunit beta-like (A)	ko03060: Protein export; ko04141: Protein processing in endoplasmic reticulum; ko04145: Phagosome	protein transport protein Sec61 subunit beta [Vigna radiata var. radiata]	RecName: Full=Protein transport protein Sec61 subunit beta;	RecName: Full=Protein transport protein Sec61 subunit beta {ECO:0000256|PIRNR:PIRNR006398};	Sec61 protein translocation complex, beta subunit	GO:0005789,endoplasmic reticulum membrane; GO:0031205,endoplasmic reticulum Sec complex; GO:0016021,integral component of membrane; GO:0005784,Sec61 translocon complex; GO:0005086,ARF guanyl-nucleotide exchange factor activity; GO:0031204,posttranslational protein targeting to membrane, translocation; GO:0006616,SRP-dependent cotranslational protein targeting to membrane, translocation	PF03911.16:Sec61beta family
Glyma.01G133500	4	Chr01	45366512	45368816	K12126 phytochrome-interacting factor 3 | (RefSeq) PIF3; hypothetical protein (A)	ko04075: Plant hormone signal transduction; ko04712: Circadian rhythm - plant	hypothetical protein GLYMA_01G133500 [Glycine max]	RecName: Full=Transcription factor UNE10; AltName: Full=Basic helix-loop-helix protein 16; Short=AtbHLH16; Short=bHLH 16; AltName: Full=Protein UNFERTILIZED EMBRYO SAC 10; AltName: Full=Transcription factor EN 108; AltName: Full=bHLH transcription factor bHLH016;	SubName: Full=Uncharacterized protein {ECO:0000313|EMBL:KRH76132.1, ECO:0000313|EnsemblPlants:GLYMA01G32890.2};	--	GO:0005634,nucleus; GO:0009506,plasmodesma; GO:0003677,DNA binding; GO:0003700,DNA-binding transcription factor activity; GO:0046983,protein dimerization activity; GO:0009567,double fertilization forming a zygote and endosperm; GO:0006355,regulation of transcription, DNA-templated; GO:0006351,transcription, DNA-templated	PF00010.26:Helix-loop-helix DNA-binding domain
Glyma.01G133900	10	Chr01	45424477	45426117	K01255 leucyl aminopeptidase [EC:3.4.11.1] | (RefSeq) leucyl aminopeptidase (A)	ko00480: Glutathione metabolism	PREDICTED: cyclin-U2-1-like [Glycine max]	RecName: Full=Cyclin-U2-1; Short=CycU2;1; AltName: Full=Cyclin-P3.1; Short=CycP3;1;	SubName: Full=Cyclin-U2-1 {ECO:0000313|EMBL:KHN11865.1};	Cyclin	GO:0019901,protein kinase binding; GO:0007049,cell cycle; GO:0051301,cell division; GO:0000079,regulation of cyclin-dependent protein serine/threonine kinase activity	PF08613.11:Cyclin
Glyma.01G137000	7	Chr01	46211354	46216137	K08341 GABA(A) receptor-associated protein | (RefSeq) autophagy-related protein 8D-like (A)	ko04136: Autophagy - other	PREDICTED: spindle and kinetochore-associated protein 1 homolog [Glycine max]	RecName: Full=Spindle and kinetochore-associated protein 1 homolog;	SubName: Full=Uncharacterized protein {ECO:0000313|EMBL:KRH76175.1, ECO:0000313|EnsemblPlants:GLYMA01G33340.1};	Uncharacterized conserved protein	GO:0008017,microtubule binding; GO:0051301,cell division; GO:0007059,chromosome segregation	PF07160.12:Spindle and kinetochore-associated protein 1
Glyma.01G137200	8	Chr01	46273121	46276417	--	--	transcription factor YABBY3 [Glycine max]	RecName: Full=Axial regulator YABBY 1; AltName: Full=Fl-54; AltName: Full=Protein ABNORMAL FLORAL ORGANS; AltName: Full=Protein FILAMENTOUS FLOWER; AltName: Full=Protein antherless;	SubName: Full=Axial regulator YABBY 1 {ECO:0000313|EMBL:KHN47898.1};	--	GO:0005634,nucleus; GO:0003677,DNA binding; GO:0003700,DNA-binding transcription factor activity; GO:0046872,metal ion binding; GO:0010158,abaxial cell fate specification; GO:0045165,cell fate commitment; GO:0010154,fruit development; GO:0010450,inflorescence meristem growth; GO:0009933,meristem structural organization; GO:0009944,polarity specification of adaxial/abaxial axis; GO:0009909,regulat…	PF04690.13:YABBY protein
Glyma.01G139500	10	Chr01	46728574	46731456	K08679 UDP-glucuronate 4-epimerase [EC:5.1.3.6] | (RefSeq) UDP-glucuronate 4-epimerase 3 (A)	ko00520: Amino sugar and nucleotide sugar metabolism	PREDICTED: UDP-glucuronate 4-epimerase 3 [Glycine max]	RecName: Full=UDP-glucuronate 4-epimerase 3; EC=5.1.3.6; AltName: Full=UDP-glucuronic acid epimerase 3;	SubName: Full=Uncharacterized protein {ECO:0000313|EMBL:KRH76209.1, ECO:0000313|EnsemblPlants:GLYMA01G33650.1};	UDP-glucose 4-epimerase/UDP-sulfoquinovose synthase	GO:0032580,Golgi cisterna membrane; GO:0016021,integral component of membrane; GO:0016020,membrane; GO:0050378,UDP-glucuronate 4-epimerase activity; GO:0005975,carbohydrate metabolic process	PF01370.21:NAD dependent epimerase/dehydratase family
Glyma.01G139600	6	Chr01	46734395	46743155	K00800 3-phosphoshikimate 1-carboxyvinyltransferase [EC:2.5.1.19] | (RefSeq) 3-phosphoshikimate 1-carboxyvinyltransferase 2 (A)	ko00400: Phenylalanine, tyrosine and tryptophan biosynthesis; ko01230: Biosynthesis of amino acids	PREDICTED: 3-phosphoshikimate 1-carboxyvinyltransferase 2 [Glycine max]	RecName: Full=3-phosphoshikimate 1-carboxyvinyltransferase, chloroplastic; EC=2.5.1.19; AltName: Full=5-enolpyruvylshikimate-3-phosphate synthase; Short=EPSP synthase; Flags: Precursor;	RecName: Full=3-phosphoshikimate 1-carboxyvinyltransferase {ECO:0000256|RuleBase:RU004164}; EC=2.5.1.19 {ECO:0000256|RuleBase:RU004164};	Pentafunctional AROM protein	GO:0009507,chloroplast; GO:0003866,3-phosphoshikimate 1-carboxyvinyltransferase activity; GO:0009073,aromatic amino acid family biosynthetic process; GO:0009423,chorismate biosynthetic process; GO:0009635,response to herbicide	PF00275.20:EPSP synthase (3-phosphoshikimate 1-carboxyvinyltransferase)
Glyma.01G141600	1	Chr01	47309563	47310197	--	--	hypothetical protein GLYMA_01G141600 [Glycine max]	RecName: Full=S-protein homolog 2 {ECO:0000303|PubMed:10344198}; Flags: Precursor;	SubName: Full=Uncharacterized protein {ECO:0000313|EMBL:KRH76244.1, ECO:0000313|EnsemblPlants:GLYMA01G34160.1};	--	GO:0005576,extracellular region; GO:0060320,rejection of self pollen	PF05938.11:Plant self-incompatibility protein S1
Glyma.01G141800	1	Chr01	47350514	47351153	--	--	hypothetical protein GLYMA_01G141800 [Glycine max]	RecName: Full=S-protein homolog 74 {ECO:0000305}; Flags: Precursor;	SubName: Full=Uncharacterized protein {ECO:0000313|EMBL:KRH76246.1, ECO:0000313|EnsemblPlants:GLYMA01G34210.1};	--	GO:0005576,extracellular region; GO:0060320,rejection of self pollen	PF05938.11:Plant self-incompatibility protein S1
Glyma.02G048900	5	Chr02	4459650	4462886	K13811 3'-phosphoadenosine 5'-phosphosulfate synthase [EC:2.7.7.4 2.7.1.25] | (RefSeq) ATP sulfurylase 2 (A)	ko00230: Purine metabolism; ko00261: Monobactam biosynthesis; ko00450: Selenocompound metabolism; ko00920: Sulfur metabolism	PREDICTED: calpain-15 isoform X1 [Glycine max]	--	SubName: Full=Uncharacterized protein {ECO:0000313|EMBL:KRH69791.1, ECO:0000313|EnsemblPlants:GLYMA02G05500.1};	RNA-binding Ran Zn-finger protein and related proteins	GO:0046872,metal ion binding	PF00641.18:Zn-finger in Ran binding protein and others
Glyma.01G142400	4	Chr01	47552209	47553757	--	--	ruBisCO-associated protein [Glycine max]	RecName: Full=RuBisCO-associated protein;	SubName: Full=Uncharacterized protein {ECO:0000313|EMBL:KRH76259.1};	--	GO:0005576,extracellular region; GO:0008061,chitin binding; GO:0004568,chitinase activity; GO:0005975,carbohydrate metabolic process; GO:0006032,chitin catabolic process	PF00704.28:Glycosyl hydrolases family 18
Glyma.01G142700	3	Chr01	47607733	47616920	K14780 ATP-dependent RNA helicase DHX37/DHR1 [EC:3.6.4.13] | (RefSeq) ATP-dependent RNA helicase DEAH13-like isoform X1 (A)	--	PREDICTED: putative ATP-dependent RNA helicase PB1A10.06c isoform X1 [Glycine max]	RecName: Full=ATP-dependent RNA helicase DEAH13; EC=3.6.4.13; AltName: Full=Protein FASCIATED STEM 4 {ECO:0000303|PubMed:19295920}; Short=AtFAS4 {ECO:0000303|PubMed:19295920};	SubName: Full=Uncharacterized protein {ECO:0000313|EMBL:KRH76262.1, ECO:0000313|EnsemblPlants:GLYMA01G34350.1};	DEAH-box RNA helicase	GO:0005737,cytoplasm; GO:0005524,ATP binding; GO:0004004,ATP-dependent RNA helicase activity; GO:0003723,RNA binding; GO:0006396,RNA processing	PF04408.23:Helicase associated domain (HA2)
Glyma.01G143100	7	Chr01	47640893	47648188	--	--	uncharacterized protein LOC100796830 [Glycine max]	RecName: Full=AT-hook motif nuclear-localized protein 2 {ECO:0000312|EMBL:FAA00273.1};	SubName: Full=Putative DNA-binding protein ESCAROLA {ECO:0000313|EMBL:KHN40147.1};	--	GO:0005634,nucleus; GO:0003677,DNA binding; GO:0006355,regulation of transcription, DNA-templated; GO:0006351,transcription, DNA-templated	PF03479.15:Plants and Prokaryotes Conserved (PCC) domain
Glyma.01G144400	1	Chr01	47862376	47864806	--	--	PREDICTED: AT-hook motif nuclear-localized protein 22 [Glycine max]	RecName: Full=AT-hook motif nuclear-localized protein 22 {ECO:0000312|EMBL:FAA00293.1};	RecName: Full=AT-hook motif nuclear-localized protein {ECO:0000256|PIRNR:PIRNR016021};	--	GO:0005634,nucleus; GO:0003680,AT DNA binding; GO:0003700,DNA-binding transcription factor activity; GO:0042826,histone deacetylase binding; GO:0043621,protein self-association; GO:0009908,flower development; GO:0009640,photomorphogenesis; GO:0009647,skotomorphogenesis; GO:0006351,transcription, DNA-templated; GO:0010228,vegetative to reproductive phase transition of meristem	PF03479.15:Plants and Prokaryotes Conserved (PCC) domain
Glyma.01G144900	3	Chr01	47957259	47961015	K22382 WD repeat-containing protein 26 | (RefSeq) WD repeat-containing protein 26 homolog (A)	--	PREDICTED: growth-regulating factor 9-like isoform X2 [Glycine max]	RecName: Full=Growth-regulating factor 9; Short=AtGRF9; AltName: Full=Transcription activator GRF9;	SubName: Full=Uncharacterized protein {ECO:0000313|EMBL:KHN40131.1};	--	GO:0005634,nucleus; GO:0005524,ATP binding; GO:0048366,leaf development; GO:0006355,regulation of transcription, DNA-templated; GO:0006351,transcription, DNA-templated	PF08879.10:WRC
Glyma.01G145200	2	Chr01	48005302	48008568	--	--	PREDICTED: uncharacterized protein LOC102669056 isoform X1 [Glycine max]	--	SubName: Full=Uncharacterized protein {ECO:0000313|EMBL:KRH76304.1, ECO:0000313|EnsemblPlants:GLYMA01G34680.2};	--	--	--
Glyma.01G146300	8	Chr01	48150827	48154366	K01759 lactoylglutathione lyase [EC:4.4.1.5] | (RefSeq) probable lactoylglutathione lyase, chloroplastic (A)	ko00620: Pyruvate metabolism	hypothetical protein GLYMA_01G146300 [Glycine max]	RecName: Full=Probable lactoylglutathione lyase, chloroplastic; EC=4.4.1.5; AltName: Full=Glyoxalase I; Flags: Precursor;	SubName: Full=Uncharacterized protein {ECO:0000313|EMBL:KRH76329.1};	Predicted glyoxalase	GO:0009507,chloroplast; GO:0009570,chloroplast stroma; GO:0010319,stromule; GO:0009579,thylakoid; GO:0031977,thylakoid lumen; GO:0004462,lactoylglutathione lyase activity; GO:0046872,metal ion binding; GO:0019243,methylglyoxal catabolic process to D-lactate via S-lactoyl-glutathione; GO:0009409,response to cold	PF00903.25:Glyoxalase/Bleomycin resistance protein/Dioxygenase superfamily
Glyma.01G146600	8	Chr01	48181319	48189905	K04345 protein kinase A [EC:2.7.11.11] | (RefSeq) predicted protein (A)	--	hypothetical protein GLYMA_01G146600 [Glycine max]	RecName: Full=Protein phosphatase 2C and cyclic nucleotide-binding/kinase domain-containing protein; Includes: RecName: Full=Probable protein phosphatase 2C 19; Short=AtPP2C19; EC=3.1.3.16; Includes: RecName: Full=Probable inactive cyclic nucleotide-dependent protein kinase At2g20050;	SubName: Full=Uncharacterized protein {ECO:0000313|EMBL:KRH76332.1};	Serine/threonine protein phosphatase	GO:0005886,plasma membrane; GO:0005524,ATP binding; GO:0046872,metal ion binding; GO:0004721,phosphoprotein phosphatase activity; GO:0004674,protein serine/threonine kinase activity	PF00481.21:Protein phosphatase 2C
Glyma.01G147600	10	Chr01	48431780	48432989	K09286 EREBP-like factor | (RefSeq) dehydration-responsive element-binding protein 3-like (A)	--	PREDICTED: dehydration-responsive element-binding protein 3-like [Glycine max]	RecName: Full=Dehydration-responsive element-binding protein 3; AltName: Full=Protein TINY 2;	SubName: Full=Uncharacterized protein {ECO:0000313|EMBL:KRH76350.1, ECO:0000313|EnsemblPlants:GLYMA01G35010.2};	--	GO:0005634,nucleus; GO:0003700,DNA-binding transcription factor activity; GO:0043565,sequence-specific DNA binding; GO:0009873,ethylene-activated signaling pathway; GO:0045893,positive regulation of transcription, DNA-templated; GO:0006351,transcription, DNA-templated	PF00847.20:AP2 domain
Glyma.01G148600	8	Chr01	48570619	48574571	K22382 WD repeat-containing protein 26 | (RefSeq) WD repeat-containing protein 26 homolog (A)	--	PREDICTED: growth-regulating factor 3-like [Glycine max]	RecName: Full=Growth-regulating factor 4; Short=OsGRF4; AltName: Full=Transcription activator GRF4;	SubName: Full=Uncharacterized protein {ECO:0000313|EMBL:KRH76368.1, ECO:0000313|EnsemblPlants:GLYMA01G35145.1};	--	GO:0005634,nucleus; GO:0005524,ATP binding; GO:0032502,developmental process; GO:0006355,regulation of transcription, DNA-templated; GO:0006351,transcription, DNA-templated	PF08879.10:WRC
Glyma.01G148700	8	Chr01	48578085	48579881	K11426 [histone H3]-lysine4/36 N-trimethyltransferase SMYD [EC:2.1.1.354 2.1.1.357] | (RefSeq) histone-lysine N-methyltransferase ASHR2-like (A)	ko00310: Lysine degradation	hypothetical protein GLYMA_01G148700 [Glycine max]	RecName: Full=Histone-lysine N-methyltransferase ASHR2; EC=2.1.1.43; AltName: Full=ASH1-related protein 2; AltName: Full=Protein SET DOMAIN GROUP 39;	SubName: Full=Uncharacterized protein {ECO:0000313|EMBL:KRH76369.1, ECO:0000313|EnsemblPlants:GLYMA01G35160.1};	Predicted histone tail methylase containing SET domain	GO:0005694,chromosome; GO:0005634,nucleus; GO:0018024,histone-lysine N-methyltransferase activity	PF00856.28:SET domain
Glyma.01G148800	9	Chr01	48581818	48583087	--	--	PREDICTED: protein PAM68, chloroplastic [Glycine max]	RecName: Full=Protein PAM68, chloroplastic; AltName: Full=PHOTOSYNTHESIS AFFECTED MUTANT 68; Flags: Precursor;	SubName: Full=Uncharacterized protein {ECO:0000313|EMBL:KRH76370.1, ECO:0000313|EnsemblPlants:GLYMA01G35170.1};	--	GO:0009507,chloroplast; GO:0009535,chloroplast thylakoid membrane; GO:0016021,integral component of membrane; GO:0009523,photosystem II; GO:0015979,photosynthesis	PF11947.8:Photosynthesis affected mutant 68
Glyma.02G050000	5	Chr02	4529545	4530681	--	--	hypothetical protein GLYMA_02G050000 [Glycine max]	--	SubName: Full=Uncharacterized protein {ECO:0000313|EMBL:KRH69805.1};	--	--	--
Glyma.01G149300	10	Chr01	48618515	48621299	K23872 putative homogalacturonan methyltransferase [EC:2.1.1.-] | (RefSeq) hypothetical protein (A)	--	PREDICTED: probable methyltransferase PMT20 [Glycine max]	RecName: Full=Probable methyltransferase PMT20; EC=2.1.1.-;	SubName: Full=Uncharacterized protein {ECO:0000313|EMBL:KRH76380.1, ECO:0000313|EnsemblPlants:GLYMA01G35220.7};	--	GO:0005737,cytoplasm; GO:0005768,endosome; GO:0005794,Golgi apparatus; GO:0000139,Golgi membrane; GO:0016021,integral component of membrane; GO:0005802,trans-Golgi network; GO:0008757,S-adenosylmethionine-dependent methyltransferase activity; GO:0032259,methylation	PF03141.16:Putative S-adenosyl-L-methionine-dependent methyltransferase
Glyma.01G149900	8	Chr01	48706713	48708667	K01897 long-chain acyl-CoA synthetase [EC:6.2.1.3] | (RefSeq) hypothetical protein (A)	ko00061: Fatty acid biosynthesis; ko00071: Fatty acid degradation; ko01212: Fatty acid metabolism; ko04146: Peroxisome	putative ankyrin repeat protein RF_0381 [Glycine max]	RecName: Full=Ankyrin repeat domain-containing protein, chloroplastic; Short=AKRP; AltName: Full=Protein EMBRYO DEFECTIVE 2036; Flags: Precursor;	SubName: Full=Uncharacterized protein {ECO:0000313|EMBL:KRH76394.1, ECO:0000313|EnsemblPlants:GLYMA01G35300.1};	FOG: Ankyrin repeat	GO:0009507,chloroplast	PF12796.7:Ankyrin repeats (3 copies)
Glyma.01G150000	7	Chr01	48712815	48713959	--	--	PREDICTED: uncharacterized protein LOC100811557 [Glycine max]	--	SubName: Full=Uncharacterized protein {ECO:0000313|EMBL:KRH76396.1, ECO:0000313|EnsemblPlants:GLYMA01G35310.2};	--	GO:0005737,cytoplasm; GO:0016021,integral component of membrane; GO:0008757,S-adenosylmethionine-dependent methyltransferase activity; GO:0032259,methylation	PF08241.12:Methyltransferase domain
Glyma.02G058800	5	Chr02	5274554	5280159	K09060 plant G-box-binding factor | (RefSeq) G-box-binding factor 1-like isoform X1 (A)	--	PREDICTED: bZIP transcription factor bZIP115 isoform X1 [Glycine max]	RecName: Full=G-box-binding factor 1; Short=AtGBF1; AltName: Full=bZIP transcription factor 41; Short=AtbZIP41;	SubName: Full=Uncharacterized protein {ECO:0000313|EMBL:KRH69948.1, ECO:0000313|EnsemblPlants:GLYMA02G06550.2};	--	GO:0005737,cytoplasm; GO:0005634,nucleus; GO:0003700,DNA-binding transcription factor activity; GO:0043565,sequence-specific DNA binding; GO:0044212,transcription regulatory region DNA binding; GO:0006351,transcription, DNA-templated	PF07777.11:G-box binding protein MFMR
Glyma.01G150700	10	Chr01	48766088	48775821	K13418 somatic embryogenesis receptor kinase 1 [EC:2.7.10.1 2.7.11.1] | (RefSeq) serk1; somatic embryogenesis receptor-like kinase 1 precursor (A)	--	PREDICTED: LRR receptor-like serine/threonine-protein kinase FEI 1-like isoform X1 [Glycine max]	RecName: Full=LRR receptor-like serine/threonine-protein kinase FEI 1; EC=2.7.11.1; Flags: Precursor;	SubName: Full=Uncharacterized protein {ECO:0000313|EMBL:KRH76408.1, ECO:0000313|EnsemblPlants:GLYMA01G35390.1};	--	GO:0016021,integral component of membrane; GO:0005886,plasma membrane; GO:0005524,ATP binding; GO:0004674,protein serine/threonine kinase activity; GO:0030244,cellulose biosynthetic process	PF00069.25:Protein kinase domain
Glyma.01G150900	8	Chr01	48784756	48786119	--	--	PREDICTED: uncharacterized protein LOC102666803 [Glycine max]	--	SubName: Full=Uncharacterized protein {ECO:0000313|EMBL:KRH76412.1, ECO:0000313|EnsemblPlants:GLYMA01G35410.1};	--	--	--
Glyma.01G151400	4	Chr01	48821123	48821914	--	--	PREDICTED: uncharacterized protein LOC102667446 [Glycine max]	--	SubName: Full=Uncharacterized protein {ECO:0000313|EMBL:KRH76417.1, ECO:0000313|EnsemblPlants:GLYMA01G35460.2};	--	GO:0016021,integral component of membrane	--
Glyma.01G152000	3	Chr01	48877448	48881248	K19861 benzyl alcohol O-benzoyltransferase [EC:2.3.1.196 2.3.1.232] | (RefSeq) methanol O-anthraniloyltransferase (A)	--	PREDICTED: methanol O-anthraniloyltransferase-like [Glycine max]	RecName: Full=Methanol O-anthraniloyltransferase; EC=2.3.1.232; AltName: Full=Anthraniloyl-CoA:methanol acyltransferase; AltName: Full=Benzyl alcohol O-benzoyltransferase; EC=2.3.1.196;	SubName: Full=Uncharacterized protein {ECO:0000313|EMBL:KRH76426.1, ECO:0000313|EnsemblPlants:GLYMA01G35530.1};	--	GO:0016747,transferase activity, transferring acyl groups other than amino-acyl groups	PF02458.15:Transferase family
Glyma.02G060000	5	Chr02	5433060	5441221	--	--	PREDICTED: BEL1-like homeodomain protein 4 [Glycine max]	RecName: Full=BEL1-like homeodomain protein 2; Short=BEL1-like protein 2; AltName: Full=Protein SAWTOOTH 1;	SubName: Full=Uncharacterized protein {ECO:0000313|EMBL:KRH69971.1};	Transcription factor MEIS1 and related HOX domain proteins	GO:0005634,nucleus; GO:0003677,DNA binding; GO:0003700,DNA-binding transcription factor activity; GO:0009965,leaf morphogenesis; GO:0006351,transcription, DNA-templated	PF07526.11:Associated with HOX
Glyma.02G065000	5	Chr02	5797404	5801626	--	--	PREDICTED: uncharacterized protein LOC100818889 isoform X2 [Glycine max]	--	SubName: Full=Uncharacterized protein {ECO:0000313|EMBL:KRH70049.1}; Flags: Fragment;	--	--	--
Glyma.01G152800	2	Chr01	48981095	48981806	--	--	hypothetical protein glysoja_003505 [Glycine soja]	--	SubName: Full=Uncharacterized protein {ECO:0000313|EMBL:KRH76450.1, ECO:0000313|EnsemblPlants:GLYMA01G35611.1};	--	GO:0048364,root development	--
Glyma.01G152900	10	Chr01	49006714	49014546	K17756 long-chain-alcohol oxidase [EC:1.1.3.20] | (RefSeq) long-chain-alcohol oxidase FAO4A-like (A)	--	PREDICTED: long-chain-alcohol oxidase FAO4A-like [Glycine max]	RecName: Full=Long-chain-alcohol oxidase FAO4A; EC=1.1.3.20; AltName: Full=Long-chain fatty alcohol oxidase 4A;	SubName: Full=Uncharacterized protein {ECO:0000313|EMBL:KRH76451.1, ECO:0000313|EnsemblPlants:GLYMA01G35620.1};	--	GO:0016021,integral component of membrane; GO:0005622,intracellular; GO:0050660,flavin adenine dinucleotide binding; GO:0046577,long-chain-alcohol oxidase activity; GO:0016491,oxidoreductase activity	PF00732.19:GMC oxidoreductase
Glyma.02G069500	5	Chr02	6116379	6117379	K16223 protein FLOWERING LOCUS T | (RefSeq) protein FLOWERING LOCUS T-like (A)	ko04712: Circadian rhythm - plant	hypothetical protein GLYMA_02G069500 [Glycine max]	RecName: Full=Protein HEADING DATE 3A; AltName: Full=FT-like protein A;	SubName: Full=Uncharacterized protein {ECO:0000313|EMBL:KRH70116.1, ECO:0000313|EnsemblPlants:GLYMA02G07650.1};	Phosphatidylethanolamine binding protein	GO:0005737,cytoplasm; GO:0005634,nucleus; GO:0008429,phosphatidylethanolamine binding; GO:0030154,cell differentiation; GO:0009908,flower development; GO:0010229,inflorescence development; GO:0009909,regulation of flower development; GO:0048510,regulation of timing of transition from vegetative to reproductive phase; GO:0048572,short-day photoperiodism; GO:0048575,short-day photoperiodism, flower…	--
Glyma.01G154000	8	Chr01	49131014	49133148	--	--	Glycine-rich protein A3 [Glycine soja]	--	SubName: Full=Glycine-rich protein A3 {ECO:0000313|EMBL:KHN28321.1};	--	--	--
Glyma.01G154200	7	Chr01	49151534	49153404	K15223 upstream activation factor subunit UAF30 | (RefSeq) upstream activation factor subunit spp27-like (A)	--	PREDICTED: protein TRI1-like [Glycine max]	RecName: Full=SWI/SNF complex component SNF12 homolog;	SubName: Full=Upstream activation factor subunit UAF30 {ECO:0000313|EMBL:KHN28319.1};	RNA polymerase I transcription factor UAF	GO:0005634,nucleus; GO:0016569,covalent chromatin modification; GO:0006281,DNA repair; GO:0009909,regulation of flower development; GO:0010468,regulation of gene expression; GO:2000024,regulation of leaf development; GO:0006355,regulation of transcription, DNA-templated; GO:0010224,response to UV-B; GO:0048364,root development; GO:0006351,transcription, DNA-templated	PF02201.18:SWIB/MDM2 domain
Glyma.01G154400	10	Chr01	49163868	49167142	K05681 ATP-binding cassette, subfamily G (WHITE), member 2 | (RefSeq) ABC transporter G family member 9-like (A)	ko02010: ABC transporters	PREDICTED: ABC transporter G family member 14 [Glycine max]	RecName: Full=ABC transporter G family member 14; Short=ABC transporter ABCG.14; Short=AtABCG14; AltName: Full=White-brown complex homolog protein 14; Short=AtWBC14;	SubName: Full=Uncharacterized protein {ECO:0000313|EMBL:KRH76470.1, ECO:0000313|EnsemblPlants:GLYMA01G35800.1};	Transporter, ABC superfamily (Breast cancer resistance protein)	GO:0016021,integral component of membrane; GO:0005886,plasma membrane; GO:0005524,ATP binding; GO:0042626,ATPase activity, coupled to transmembrane movement of substances; GO:0010588,cotyledon vascular tissue pattern formation; GO:0010222,stem vascular tissue pattern formation	PF01061.24:ABC-2 type transporter
Glyma.01G154900	10	Chr01	49241723	49244645	K09840 9-cis-epoxycarotenoid dioxygenase [EC:1.13.11.51] | (RefSeq) probable carotenoid cleavage dioxygenase 4, chloroplastic (A)	ko00906: Carotenoid biosynthesis	PREDICTED: probable carotenoid cleavage dioxygenase 4, chloroplastic [Glycine max]	RecName: Full=Probable carotenoid cleavage dioxygenase 4, chloroplastic; Short=AtCCD4; EC=1.14.99.-; AltName: Full=AtNCED4; Flags: Precursor;	SubName: Full=Uncharacterized protein {ECO:0000313|EMBL:KRH76475.1, ECO:0000313|EnsemblPlants:GLYMA01G35910.2};	Beta, beta-carotene 15,15'-dioxygenase and related enzymes	GO:0009507,chloroplast; GO:0010287,plastoglobule; GO:0046872,metal ion binding; GO:0016702,oxidoreductase activity, acting on single donors with incorporation of molecular oxygen, incorporation of two atoms of oxygen	PF03055.15:Retinal pigment epithelial membrane protein
Glyma.01G155400	1	Chr01	49292547	49294902	K23947 2-oxoglutarate-dependent dioxygenase [EC:1.14.11.-] | (RefSeq) 2-oxoglutarate-dependent dioxygenase DAO-like (A)	ko00380: Tryptophan metabolism	PREDICTED: 2-oxoglutarate-dependent dioxygenase DAO-like [Glycine max]	RecName: Full=2-oxoglutarate-dependent dioxygenase DAO; EC=1.14.11.-; AltName: Full=Protein DIOXYGENASE FOR AUXIN OXIDATION;	SubName: Full=Uncharacterized protein {ECO:0000313|EMBL:KRH76480.1, ECO:0000313|EnsemblPlants:GLYMA01G35960.1};	Iron/ascorbate family oxidoreductases	GO:0051213,dioxygenase activity; GO:0046872,metal ion binding; GO:0009852,auxin catabolic process	PF03171.20:2OG-Fe(II) oxygenase superfamily
Glyma.01G155900	9	Chr01	49322812	49327714	K15333 tRNA guanosine-2'-O-methyltransferase [EC:2.1.1.34] | (RefSeq) uncharacterized protein LOC104224633 (A)	--	PREDICTED: subtilisin-like protease SBT5.3 [Glycine max]	RecName: Full=Subtilisin-like protease SBT5.3; EC=3.4.21.-; AltName: Full=Auxin-induced in root cultures protein 3; AltName: Full=Subtilase subfamily 5 member 3; Short=AtSBT5.3; AltName: Full=Subtilisin-like protease AIR3; Flags: Precursor;	SubName: Full=Uncharacterized protein {ECO:0000313|EMBL:KRH76486.1, ECO:0000313|EnsemblPlants:GLYMA01G36000.1};	--	GO:0005618,cell wall; GO:0005576,extracellular region; GO:0004252,serine-type endopeptidase activity; GO:0010102,lateral root morphogenesis; GO:0009733,response to auxin	PF00082.22:Subtilase family
Glyma.01G156200	10	Chr01	49361352	49366113	K13116 ATP-dependent RNA helicase DDX41 [EC:3.6.4.13] | (RefSeq) uncharacterized protein LOC110093888 isoform X1 (A)	--	PREDICTED: uncharacterized transporter YBR287W [Glycine max]	RecName: Full=Protein PIN-LIKES 3 {ECO:0000303|PubMed:22504182}; AltName: Full=Auxin efflux carrier-like protein 3 {ECO:0000303|PubMed:22504182};	SubName: Full=Uncharacterized protein {ECO:0000313|EMBL:KRH76489.1, ECO:0000313|EnsemblPlants:GLYMA01G36030.5};	Predicted membrane protein	GO:0005789,endoplasmic reticulum membrane; GO:0016021,integral component of membrane; GO:0009734,auxin-activated signaling pathway; GO:0009733,response to auxin; GO:0055085,transmembrane transport	PF03547.18:Membrane transport protein
Glyma.01G156400	8	Chr01	49382926	49389892	--	--	PREDICTED: AT-rich interactive domain-containing protein 3 [Glycine max]	RecName: Full=AT-rich interactive domain-containing protein 3; Short=ARID domain-containing protein 3;	SubName: Full=Uncharacterized protein {ECO:0000313|EMBL:KRH76496.1};	DNA-binding proteins Bright/BRCAA1/RBP1 and related proteins containing BRIGHT domain	GO:0005634,nucleus; GO:0003700,DNA-binding transcription factor activity; GO:0000977,RNA polymerase II regulatory region sequence-specific DNA binding; GO:0001228,DNA-binding transcription activator activity, RNA polymerase II-specific; GO:0006355,regulation of transcription, DNA-templated	PF01388.21:ARID/BRIGHT DNA binding domain
Glyma.01G156600	6	Chr01	49404433	49409266	K00384 thioredoxin reductase (NADPH) [EC:1.8.1.9] | (RefSeq) thioredoxin reductase NTRB-like (A)	ko00450: Selenocompound metabolism	PREDICTED: thioredoxin reductase NTRB-like [Glycine max]	RecName: Full=Thioredoxin reductase 2; EC=1.8.1.9; AltName: Full=NADPH-dependent thioredoxin reductase 2; Short=NTR2; AltName: Full=NADPH-dependent thioredoxin reductase A; Short=AtNTRA;	RecName: Full=Thioredoxin reductase {ECO:0000256|RuleBase:RU003881}; EC=1.8.1.9 {ECO:0000256|RuleBase:RU003881};	Thioredoxin reductase	GO:0005759,mitochondrial matrix; GO:0004791,thioredoxin-disulfide reductase activity; GO:0019430,removal of superoxide radicals	PF07992.14:Pyridine nucleotide-disulphide oxidoreductase
Glyma.01G156700	9	Chr01	49418000	49422754	K00021 hydroxymethylglutaryl-CoA reductase (NADPH) [EC:1.1.1.34] | (RefSeq) 3-hydroxy-3-methylglutaryl-coenzyme A reductase 1-like (A)	ko00900: Terpenoid backbone biosynthesis	PREDICTED: 3-hydroxy-3-methylglutaryl-coenzyme A reductase 1-like [Glycine max]	RecName: Full=3-hydroxy-3-methylglutaryl-coenzyme A reductase 3; Short=HMG-CoA reductase 3; EC=1.1.1.34; AltName: Full=HMG3.3;	RecName: Full=3-hydroxy-3-methylglutaryl coenzyme A reductase {ECO:0000256|RuleBase:RU361219}; Short=HMG-CoA reductase {ECO:0000256|RuleBase:RU361219}; EC=1.1.1.34 {ECO:0000256|RuleBase:RU361219};	3-hydroxy-3-methylglutaryl-CoA (HMG-CoA) reductase	GO:0005789,endoplasmic reticulum membrane; GO:0016021,integral component of membrane; GO:0004420,hydroxymethylglutaryl-CoA reductase (NADPH) activity; GO:0050661,NADP binding; GO:0015936,coenzyme A metabolic process; GO:0008299,isoprenoid biosynthetic process	PF00368.18:Hydroxymethylglutaryl-coenzyme A reductase
Glyma.01G157300	10	Chr01	49512429	49516668	K08150 MFS transporter, SP family, solute carrier family 2 (myo-inositol transporter), member 13 | (Kazusa) Lj4g3v0119930.1; - (A)	--	PREDICTED: monosaccharide-sensing protein 2 [Glycine max]	RecName: Full=Monosaccharide-sensing protein 3; AltName: Full=Sugar transporter MSSP3;	SubName: Full=Uncharacterized protein {ECO:0000313|EMBL:KRH76516.1, ECO:0000313|EnsemblPlants:GLYMA01G36145.1};	Predicted transporter (major facilitator superfamily)	GO:0016021,integral component of membrane; GO:0005355,glucose transmembrane transporter activity; GO:0005351,carbohydrate:proton symporter activity; GO:0046323,glucose import; GO:0035428,NA	PF00083.24:Sugar (and other) transporter
Glyma.01G157400	9	Chr01	49531959	49533545	K19040 E3 ubiquitin-protein ligase ATL10/75/76/77/78 [EC:2.3.2.27] | (RefSeq) RING-H2 finger protein ATL78-like (A)	--	PREDICTED: RING-H2 finger protein ATL8-like [Glycine max]	RecName: Full=RING-H2 finger protein ATL8; EC=2.3.2.27 {ECO:0000305}; AltName: Full=RING-type E3 ubiquitin transferase ATL8 {ECO:0000305};	SubName: Full=Uncharacterized protein {ECO:0000313|EMBL:KRH76518.1, ECO:0000313|EnsemblPlants:GLYMA01G36160.1};	FOG: Predicted E3 ubiquitin ligase	GO:0016021,integral component of membrane; GO:0046872,metal ion binding; GO:0061630,ubiquitin protein ligase activity; GO:0043161,proteasome-mediated ubiquitin-dependent protein catabolic process	PF13639.6:Ring finger domain
Glyma.02G073300	5	Chr02	6408519	6409885	--	--	PREDICTED: uncharacterized protein LOC100786436 [Glycine max]	--	SubName: Full=Uncharacterized protein {ECO:0000313|EMBL:KRH70180.1, ECO:0000313|EnsemblPlants:GLYMA02G08080.1};	--	--	--
Glyma.01G158200	10	Chr01	49623404	49627627	K08832 serine/threonine-protein kinase SRPK3 [EC:2.7.11.1] | (RefSeq) SRSF protein kinase 1-like (A)	--	PREDICTED: SRSF protein kinase 1-like [Glycine max]	RecName: Full=Serine/threonine-protein kinase AFC2; EC=2.7.12.1;	SubName: Full=Uncharacterized protein {ECO:0000313|EMBL:KRH76530.1, ECO:0000313|EnsemblPlants:GLYMA01G36260.1};	Serine/threonine protein kinase	GO:0005524,ATP binding; GO:0004672,protein kinase activity; GO:0004674,protein serine/threonine kinase activity; GO:0004712,protein serine/threonine/tyrosine kinase activity; GO:0006397,mRNA processing; GO:0046777,protein autophosphorylation	PF00069.25:Protein kinase domain
Glyma.01G158400	12	Chr01	49635856	49646618	K08739 DNA mismatch repair protein MLH3 | (RefSeq) DNA mismatch repair protein MLH3-like (A)	ko03430: Mismatch repair	PREDICTED: DNA mismatch repair protein MLH3-like isoform X1 [Glycine max]	RecName: Full=DNA mismatch repair protein MLH3; AltName: Full=MutL protein homolog 3;	SubName: Full=Uncharacterized protein {ECO:0000313|EMBL:KRH76533.1, ECO:0000313|EnsemblPlants:GLYMA01G36280.2};	DNA mismatch repair protein - MLH3 family	GO:0005712,chiasma; GO:0005694,chromosome; GO:0032300,mismatch repair complex; GO:0000795,synaptonemal complex; GO:0005524,ATP binding; GO:0016887,ATPase activity; GO:0030983,mismatched DNA binding; GO:0003697,single-stranded DNA binding; GO:0006298,mismatch repair; GO:0007131,reciprocal meiotic recombination	PF08676.11:MutL C terminal dimerisation domain
Glyma.01G158600	2	Chr01	49665180	49671385	--	--	PREDICTED: uncharacterized protein LOC100789616 [Glycine max]	--	SubName: Full=Uncharacterized protein {ECO:0000313|EMBL:KRH76536.1, ECO:0000313|EnsemblPlants:GLYMA01G36301.1};	--	--	PF14309.6:Domain of unknown function (DUF4378)
Glyma.01G159200	8	Chr01	49710855	49716475	K23460 Rab proteins geranylgeranyltransferase component A | (RefSeq) uncharacterized LOC101497150 (A)	--	PREDICTED: uncharacterized protein LOC100795946 [Glycine max]	RecName: Full=Protein RKD5; Short=AtRKD5; AltName: Full=RWP-RK domain-containing protein 5;	SubName: Full=Uncharacterized protein {ECO:0000313|EMBL:KRH76545.1, ECO:0000313|EnsemblPlants:GLYMA01G36360.1};	--	GO:0005634,nucleus; GO:0003677,DNA binding; GO:0003700,DNA-binding transcription factor activity; GO:0006355,regulation of transcription, DNA-templated; GO:0006351,transcription, DNA-templated	PF02042.15:RWP-RK domain
Glyma.02G076600	5	Chr02	6670064	6671855	K13993 HSP20 family protein | (RefSeq) 16.9 kDa class I heat shock protein 3-like (A)	ko04141: Protein processing in endoplasmic reticulum	seed maturation protein PM31 [Glycine max]	RecName: Full=17.6 kDa class I heat shock protein 3; AltName: Full=17.6 kDa heat shock protein 3; Short=AtHsp17.6C;	SubName: Full=Seed maturation protein PM31 {ECO:0000313|EMBL:AAD30865.1};	Molecular chaperone (small heat-shock protein Hsp26/Hsp42)	GO:0005737,cytoplasm	PF00011.21:Hsp20/alpha crystallin family
Glyma.01G159700	7	Chr01	49821063	49824498	K21777 G2/mitotic-specific cyclin-B, other | (RefSeq) G2/mitotic-specific cyclin-1-like (A)	--	hypothetical protein GLYMA_01G159700 [Glycine max]	RecName: Full=G2/mitotic-specific cyclin-1; AltName: Full=B-like cyclin; AltName: Full=CycMs1;	SubName: Full=Uncharacterized protein {ECO:0000313|EMBL:KRH76553.1, ECO:0000313|EnsemblPlants:GLYMA01G36430.2};	Cyclin B and related kinase-activating proteins	GO:0005634,nucleus; GO:0007049,cell cycle; GO:0051301,cell division	PF00134.23:Cyclin, N-terminal domain
Glyma.01G159800	6	Chr01	49827017	49829062	K00831 phosphoserine aminotransferase [EC:2.6.1.52] | (RefSeq) phosphoserine aminotransferase 1, chloroplastic-like (A)	ko00260: Glycine, serine and threonine metabolism; ko00270: Cysteine and methionine metabolism; ko00750: Vitamin B6 metabolism; ko01200: Carbon metabolism; ko01230: Biosynthesis of amino acids	PREDICTED: phosphoserine aminotransferase 1, chloroplastic-like [Glycine max]	RecName: Full=Phosphoserine aminotransferase 1, chloroplastic; Short=AtPSAT1; EC=2.6.1.52; AltName: Full=Phosphohydroxythreonine aminotransferase; Flags: Precursor;	RecName: Full=Phosphoserine aminotransferase {ECO:0000256|RuleBase:RU004505}; EC=2.6.1.52 {ECO:0000256|RuleBase:RU004505};	Phosphoserine aminotransferase	GO:0009507,chloroplast; GO:0009570,chloroplast stroma; GO:0009536,plastid; GO:0004648,O-phospho-L-serine:2-oxoglutarate aminotransferase activity; GO:0006564,L-serine biosynthetic process; GO:0009735,response to cytokinin	PF00266.19:Aminotransferase class-V
Glyma.01G160100	10	Chr01	49869398	49871874	K20547 basic endochitinase B [EC:3.2.1.14] | (RefSeq) endochitinase-like (A)	ko00520: Amino sugar and nucleotide sugar metabolism; ko04016: MAPK signaling pathway - plant	PREDICTED: endochitinase-like [Glycine max]	RecName: Full=Endochitinase; EC=3.2.1.14; Flags: Precursor;	SubName: Full=Uncharacterized protein {ECO:0000313|EMBL:KRH76560.1, ECO:0000313|EnsemblPlants:GLYMA01G36480.1};	Predicted chitinase	GO:0008061,chitin binding; GO:0004568,chitinase activity; GO:0016998,cell wall macromolecule catabolic process; GO:0006032,chitin catabolic process; GO:0006952,defense response; GO:0000272,polysaccharide catabolic process	PF00182.19:Chitinase class I
Glyma.01G160300	7	Chr01	49878554	49883503	K00558 DNA (cytosine-5)-methyltransferase 1 [EC:2.1.1.37] | (RefSeq) putative DNA (cytosine-5)-methyltransferase CMT1 (A)	ko00270: Cysteine and methionine metabolism	PREDICTED: putative DNA (cytosine-5)-methyltransferase CMT1 [Glycine max]	RecName: Full=DNA (cytosine-5)-methyltransferase CMT3 {ECO:0000305}; EC=2.1.1.37 {ECO:0000305}; AltName: Full=Chromomethylase 3 {ECO:0000305}; AltName: Full=OsCMT3a {ECO:0000303|PubMed:26243209};	SubName: Full=Uncharacterized protein {ECO:0000313|EMBL:KRH76562.1, ECO:0000313|EnsemblPlants:GLYMA01G36500.1};	--	GO:0005634,nucleus; GO:0003682,chromatin binding; GO:0003886,DNA (cytosine-5-)-methyltransferase activity; GO:0003677,DNA binding; GO:0032776,DNA methylation on cytosine; GO:0010216,maintenance of DNA methylation	PF00145.17:C-5 cytosine-specific DNA methylase
Glyma.02G078600	5	Chr02	6773615	6779990	K11168 dehydrogenase/reductase SDR family member 12 [EC:1.1.-.-] | (RefSeq) dehydrogenase/reductase SDR family member 12 (A)	--	Dehydrogenase/reductase SDR family member 12 [Glycine soja]	RecName: Full=Short-chain dehydrogenase TIC 32, chloroplastic; EC=1.1.1.-; AltName: Full=Translocon at the inner envelope membrane of chloroplasts 32; Short=AtTIC32;	SubName: Full=Uncharacterized protein {ECO:0000313|EMBL:KRH70251.1, ECO:0000313|EnsemblPlants:GLYMA02G08610.1};	Dehydrogenases with different specificities (related to short-chain alcohol dehydrogenases)	GO:0009507,chloroplast; GO:0009941,chloroplast envelope; GO:0009706,chloroplast inner membrane; GO:0005886,plasma membrane; GO:0016491,oxidoreductase activity; GO:0015031,protein transport	PF00106.25:short chain dehydrogenase
Glyma.01G161500	1	Chr01	49956121	49958722	K22547 arsenate reductase [EC:1.20.4.1] | (RefSeq) thiosulfate sulfurtransferase 18-like (A)	--	uncharacterized protein LOC100305968 [Glycine max]	RecName: Full=Rhodanese-like domain-containing protein 15, chloroplastic; AltName: Full=Protein DARK INDUCIBLE 1; AltName: Full=Senescence-associated protein 1; Short=AtSEN1; AltName: Full=Sulfurtransferase 15; Short=AtStr15; Flags: Precursor;	SubName: Full=Uncharacterized protein {ECO:0000313|EMBL:ACU13915.1, ECO:0000313|EnsemblPlants:GLYMA01G36620.1};	Rhodanese-related sulfurtransferase	GO:0009507,chloroplast; GO:0009579,thylakoid; GO:0007568,aging; GO:0009753,response to jasmonic acid; GO:0006979,response to oxidative stress; GO:0009611,response to wounding	PF00581.20:Rhodanese-like domain
Glyma.01G161700	6	Chr01	49988892	49991976	K08999 uncharacterized protein | (RefSeq) bifunctional nuclease 2-like isoform X1 (A)	--	PREDICTED: bifunctional nuclease 2-like isoform X1 [Glycine max]	RecName: Full=Bifunctional nuclease 2; Short=OsBBD2; EC=3.1.-.-;	SubName: Full=Uncharacterized protein {ECO:0000313|EMBL:KRH76582.1};	--	GO:0005634,nucleus; GO:0004518,nuclease activity	PF02577.14:Bifunctional nuclease
Glyma.01G162100	9	Chr01	50010865	50019103	K01115 phospholipase D1/2 [EC:3.1.4.4] | (RefSeq) phospholipase D delta-like isoform X1 (A)	ko00564: Glycerophospholipid metabolism; ko00565: Ether lipid metabolism; ko04144: Endocytosis	PREDICTED: phospholipase D delta-like isoform X1 [Glycine max]	RecName: Full=Phospholipase D delta {ECO:0000303|PubMed:11891260}; Short=AtPLDdelta {ECO:0000303|PubMed:11891260}; Short=PLD delta {ECO:0000303|PubMed:11891260}; EC=3.1.4.4 {ECO:0000269|PubMed:11706190, ECO:0000269|PubMed:12397060};	RecName: Full=Phospholipase D {ECO:0000256|PIRNR:PIRNR036470}; EC=3.1.4.4 {ECO:0000256|PIRNR:PIRNR036470};	Phospholipase D1	GO:0016020,membrane; GO:0005886,plasma membrane; GO:0009506,plasmodesma; GO:0005773,vacuole; GO:0005509,calcium ion binding; GO:0070290,N-acylphosphatidylethanolamine-specific phospholipase D activity; GO:0004630,phospholipase D activity; GO:0016042,lipid catabolic process; GO:0046473,phosphatidic acid metabolic process; GO:0046470,phosphatidylcholine metabolic process; GO:0009789,positive regula…	PF12357.8:Phospholipase D C terminal
Glyma.01G162500	2	Chr01	50046261	50049289	--	--	uncharacterized protein LOC100527729 [Glycine max]	--	SubName: Full=Uncharacterized protein {ECO:0000313|EMBL:ACU16887.1, ECO:0000313|EnsemblPlants:GLYMA01G36720.1};	--	--	--
Glyma.01G163000	10	Chr01	50088587	50092706	K00924 kinase [EC:2.7.1.-] | (RefSeq) aspartic proteinase-like protein 2 (A)	--	PREDICTED: aspartic proteinase-like protein 1 isoform X1 [Glycine max]	RecName: Full=Aspartyl protease family protein 1 {ECO:0000305}; EC=3.4.23.- {ECO:0000305}; Flags: Precursor;	SubName: Full=Uncharacterized protein {ECO:0000313|EMBL:KRH76603.1, ECO:0000313|EnsemblPlants:GLYMA01G36770.1};	Aspartyl protease	GO:0031225,anchored component of membrane; GO:0005886,plasma membrane; GO:0004190,aspartic-type endopeptidase activity; GO:0030163,protein catabolic process; GO:0006508,proteolysis	PF14543.6:Xylanase inhibitor N-terminal
Glyma.01G163100	10	Chr01	50095424	50097367	K00430 peroxidase [EC:1.11.1.7] | (RefSeq) peroxidase 64-like (A)	ko00940: Phenylpropanoid biosynthesis	PREDICTED: peroxidase 64 [Glycine max]	RecName: Full=Peroxidase 64; Short=Atperox P64; EC=1.11.1.7; AltName: Full=ATP17a; AltName: Full=PRXR4; Flags: Precursor;	RecName: Full=Peroxidase {ECO:0000256|RuleBase:RU362060, ECO:0000256|SAAS:SAAS00709852}; EC=1.11.1.7 {ECO:0000256|RuleBase:RU362060, ECO:0000256|SAAS:SAAS00709852};	--	GO:0005576,extracellular region; GO:0009505,plant-type cell wall; GO:0009506,plasmodesma; GO:0020037,heme binding; GO:0046872,metal ion binding; GO:0004601,peroxidase activity; GO:0042744,hydrogen peroxide catabolic process; GO:0009664,plant-type cell wall organization; GO:0006979,response to oxidative stress	PF00141.23:Peroxidase
Glyma.01G163700	8	Chr01	50139693	50141851	--	--	uncharacterized protein LOC100500428 [Glycine max]	--	SubName: Full=Uncharacterized protein {ECO:0000313|EMBL:ACU15514.1, ECO:0000313|EnsemblPlants:GLYMA01G36831.1};	--	--	PF03966.16:Trm112p-like protein
Glyma.01G164500	3	Chr01	50206480	50210828	K03029 26S proteasome regulatory subunit N10 | (RefSeq) 26S proteasome non-ATPase regulatory subunit 4 homolog (A)	ko03050: Proteasome	PREDICTED: uncharacterized protein LOC102662030 isoform X1 [Glycine max]	RecName: Full=Nitrate regulatory gene2 protein {ECO:0000303|PubMed:26744214}; Short=NRG2 protein {ECO:0000303|PubMed:26744214};	SubName: Full=Uncharacterized protein {ECO:0000313|EMBL:KRH76635.1, ECO:0000313|EnsemblPlants:GLYMA01G36920.1};	--	GO:0005634,nucleus; GO:0071249,cellular response to nitrate; GO:0015706,nitrate transport; GO:0071705,nitrogen compound transport; GO:0006355,regulation of transcription, DNA-templated; GO:0010167,response to nitrate; GO:1901698,response to nitrogen compound; GO:0006351,transcription, DNA-templated	PF04782.12:Protein of unknown function (DUF632)
Glyma.01G164700	10	Chr01	50218315	50222373	K00434 L-ascorbate peroxidase [EC:1.11.1.11] | (RefSeq) L-ascorbate peroxidase 3-like (A)	ko00053: Ascorbate and aldarate metabolism; ko00480: Glutathione metabolism	PREDICTED: L-ascorbate peroxidase 3, peroxisomal-like [Glycine max]	RecName: Full=L-ascorbate peroxidase 3; Short=AtAPx03; EC=1.11.1.11;	SubName: Full=Uncharacterized protein {ECO:0000313|EMBL:KRH76637.1, ECO:0000313|EnsemblPlants:GLYMA01G36940.1};	--	GO:0009507,chloroplast; GO:0009941,chloroplast envelope; GO:0046861,glyoxysomal membrane; GO:0016021,integral component of membrane; GO:0005739,mitochondrion; GO:0005778,peroxisomal membrane; GO:0005777,peroxisome; GO:0009506,plasmodesma; GO:0009536,plastid; GO:0005774,vacuolar membrane; GO:0005773,vacuole; GO:0004130,cytochrome-c peroxidase activity; GO:0020037,heme binding; GO:0016688,L-ascorba…	PF00141.23:Peroxidase
Glyma.01G164800	8	Chr01	50223776	50231525	K14489 arabidopsis histidine kinase 2/3/4 (cytokinin receptor) [EC:2.7.13.3] | (RefSeq) histidine kinase 3-like (A)	ko04075: Plant hormone signal transduction	PREDICTED: histidine kinase 1-like isoform X1 [Glycine max]	RecName: Full=Histidine kinase 1; EC=2.7.13.3; AltName: Full=Arabidopsis histidine kinase 1; Short=AtHK1; AltName: Full=Protein AUTHENTIC HIS-KINASE 1;	SubName: Full=Uncharacterized protein {ECO:0000313|EMBL:KRH76639.1};	Sensory transduction histidine kinase	GO:0016021,integral component of membrane; GO:0005622,intracellular; GO:0005886,plasma membrane; GO:0009927,histidine phosphotransfer kinase activity; GO:0005034,osmosensor activity; GO:0000155,phosphorelay sensor kinase activity; GO:0009738,abscisic acid-activated signaling pathway; GO:0006970,response to osmotic stress; GO:0009414,response to water deprivation; GO:0010431,seed maturation; GO:00…	PF02518.26:Histidine kinase-, DNA gyrase B-, and HSP90-like ATPase
Glyma.01G165200	2	Chr01	50270214	50275794	K08472 mlo protein | (RefSeq) MLO-like protein 4 (A)	--	PREDICTED: MLO-like protein 4 isoform X1 [Glycine max]	RecName: Full=MLO-like protein 4; Short=AtMlo4;	RecName: Full=MLO-like protein {ECO:0000256|RuleBase:RU280816};	--	GO:0016021,integral component of membrane; GO:0005886,plasma membrane; GO:0005516,calmodulin binding; GO:0006952,defense response; GO:0009607,response to biotic stimulus	PF03094.15:Mlo family
Glyma.01G165300	10	Chr01	50276377	50278258	K15692 E3 ubiquitin-protein ligase RNF13 [EC:2.3.2.27] | (RefSeq) receptor homology region, transmembrane domain- and RING domain-containing protein 1-like (A)	--	PREDICTED: thiosulfate sulfurtransferase 18-like [Glycine max]	RecName: Full=Rhodanese-like domain-containing protein 17; AltName: Full=Sulfurtransferase 17; Short=AtStr17;	SubName: Full=Uncharacterized protein {ECO:0000313|EMBL:KRH76647.1, ECO:0000313|EnsemblPlants:GLYMA01G37010.1};	Rhodanese-related sulfurtransferase	--	PF00581.20:Rhodanese-like domain
Glyma.01G165400	10	Chr01	50285851	50288150	K12173 BRCA1-A complex subunit BRE | (RefSeq) BRCA1-A complex subunit BRE-like (A)	ko03440: Homologous recombination	PREDICTED: thaumatin-like protein 1b [Glycine max]	RecName: Full=Thaumatin-like protein 1 {ECO:0000303|PubMed:15988566}; Short=AtTLP1 {ECO:0000303|PubMed:15988566}; Flags: Precursor;	SubName: Full=Uncharacterized protein {ECO:0000313|EMBL:KRH76648.1, ECO:0000313|EnsemblPlants:GLYMA01G37020.1};	--	GO:0009682,induced systemic resistance; GO:0009617,response to bacterium; GO:0009723,response to ethylene	PF00314.17:Thaumatin family
Glyma.01G165600	3	Chr01	50305165	50307365	K12173 BRCA1-A complex subunit BRE | (RefSeq) BRCA1-A complex subunit BRE-like (A)	ko03440: Homologous recombination	PREDICTED: thaumatin-like protein 1b [Glycine max]	RecName: Full=Thaumatin-like protein 1 {ECO:0000303|PubMed:15988566}; Short=AtTLP1 {ECO:0000303|PubMed:15988566}; Flags: Precursor;	SubName: Full=Uncharacterized protein {ECO:0000313|EMBL:KRH76650.1, ECO:0000313|EnsemblPlants:GLYMA01G37040.1};	--	GO:0009682,induced systemic resistance; GO:0009617,response to bacterium; GO:0009723,response to ethylene	PF00314.17:Thaumatin family
Glyma.01G165900	7	Chr01	50339264	50341908	K00276 primary-amine oxidase [EC:1.4.3.21] | (RefSeq) hypothetical protein (A)	ko00260: Glycine, serine and threonine metabolism; ko00350: Tyrosine metabolism; ko00360: Phenylalanine metabolism; ko00410: beta-Alanine metabolism; ko00950: Isoquinoline alkaloid biosynthesis; ko00960: Tropane, piperidine and pyridine alkaloid biosynthesis	PREDICTED: uncharacterized protein LOC100816188 [Glycine max]	--	SubName: Full=Uncharacterized protein {ECO:0000313|EMBL:KRH76654.1, ECO:0000313|EnsemblPlants:GLYMA01G37080.1};	--	GO:0005737,cytoplasm; GO:0005634,nucleus	PF00514.23:Armadillo/beta-catenin-like repeat
Glyma.01G166300	7	Chr01	50402188	50404181	--	--	PREDICTED: uncharacterized protein LOC100818852 [Glycine max]	--	SubName: Full=Uncharacterized protein {ECO:0000313|EMBL:KRH76659.1, ECO:0000313|EnsemblPlants:GLYMA01G37130.1};	--	GO:0009570,chloroplast stroma; GO:0005504,fatty acid binding; GO:0006631,fatty acid metabolic process	--
Glyma.01G166400	8	Chr01	50404781	50436297	K08874 transformation/transcription domain-associated protein | (RefSeq) transformation/transcription domain-associated protein-like (A)	--	PREDICTED: transformation/transcription domain-associated protein-like [Glycine max]	RecName: Full=Serine/threonine-protein kinase ATR; EC=2.7.11.1;	SubName: Full=Uncharacterized protein {ECO:0000313|EMBL:KRH76660.1, ECO:0000313|EnsemblPlants:GLYMA01G37136.1};	Histone acetyltransferase SAGA, TRRAP/TRA1 component, PI-3 kinase superfamily	GO:0005634,nucleus; GO:0005524,ATP binding; GO:0016301,kinase activity; GO:0004674,protein serine/threonine kinase activity; GO:0007049,cell cycle; GO:0006281,DNA repair	PF02259.23:FAT domain
Glyma.01G166500	8	Chr01	50441351	50442688	--	--	PREDICTED: WEB family protein At3g51220-like [Glycine max]	RecName: Full=WEB family protein At3g51220;	SubName: Full=Uncharacterized protein {ECO:0000313|EMBL:KRH76661.1, ECO:0000313|EnsemblPlants:GLYMA01G37150.1};	--	GO:0005829,cytosol; GO:0009904,chloroplast accumulation movement; GO:0009903,chloroplast avoidance movement	PF05701.11:Weak chloroplast movement under blue light
Glyma.02G085800	5	Chr02	7479505	7480566	--	--	PREDICTED: uncharacterized protein LOC100810515 isoform X2 [Glycine max]	--	SubName: Full=Uncharacterized protein {ECO:0000313|EMBL:KHN15458.1};	--	--	--
Glyma.01G167700	1	Chr01	50530240	50531768	K11275 histone H1/5 | (RefSeq) histone H1-like (A)	--	hypothetical protein GLYMA_01G1677001, partial [Glycine max]	--	SubName: Full=Uncharacterized protein {ECO:0000313|EMBL:KRH76678.1}; Flags: Fragment;	--	GO:0016021,integral component of membrane	--
Glyma.01G168000	10	Chr01	50564900	50566856	K02155 V-type H+-transporting ATPase 16kDa proteolipid subunit | (RefSeq) V-type proton ATPase 16 kDa proteolipid subunit (A)	ko00190: Oxidative phosphorylation; ko04145: Phagosome	PREDICTED: V-type proton ATPase 16 kDa proteolipid subunit-like [Glycine max]	RecName: Full=V-type proton ATPase 16 kDa proteolipid subunit; Short=V-ATPase 16 kDa proteolipid subunit; AltName: Full=Vacuolar proton pump 16 kDa proteolipid subunit;	RecName: Full=V-type proton ATPase proteolipid subunit {ECO:0000256|RuleBase:RU363060};	Vacuolar H+-ATPase V0 sector, subunits c/c'	GO:0016021,integral component of membrane; GO:0033179,proton-transporting V-type ATPase, V0 domain; GO:0005774,vacuolar membrane; GO:0015078,proton transmembrane transporter activity; GO:0015991,ATP hydrolysis coupled proton transport	PF00137.21:ATP synthase subunit C
Glyma.01G168200	10	Chr01	50582822	50590835	K11498 centromeric protein E | (RefSeq) kinesin-like protein NACK2 (A)	--	PREDICTED: kinesin-like protein NACK2 [Glycine max]	RecName: Full=Kinesin-like protein KIN-7G {ECO:0000305};	RecName: Full=Kinesin-like protein {ECO:0000256|RuleBase:RU000394};	Kinesin-like protein	GO:0005871,kinesin complex; GO:0005874,microtubule; GO:0005524,ATP binding; GO:0016887,ATPase activity; GO:0008017,microtubule binding; GO:0003777,microtubule motor activity; GO:0007018,microtubule-based movement	PF00225.23:Kinesin motor domain
Glyma.01G168300	7	Chr01	50599907	50603304	--	--	hypothetical protein GLYMA_01G168300 [Glycine max]	--	SubName: Full=Uncharacterized protein {ECO:0000313|EMBL:KRH76687.1};	--	--	--
Glyma.01G168400	3	Chr01	50605679	50608020	K08234 glyoxylase I family protein | (RefSeq) hypothetical protein (A)	--	glyoxalase GLYI-2 [Glycine max]	--	SubName: Full=Uncharacterized protein {ECO:0000313|EMBL:KRH76688.1, ECO:0000313|EnsemblPlants:GLYMA01G37360.1};	--	--	PF00903.25:Glyoxalase/Bleomycin resistance protein/Dioxygenase superfamily
Glyma.01G168500	1	Chr01	50609598	50613102	K12135 zinc finger protein CONSTANS | (RefSeq) zinc finger protein CONSTANS isoform X2 (A)	ko04712: Circadian rhythm - plant	hypothetical protein GLYMA_01G168500 [Glycine max]	RecName: Full=B-box zinc finger protein 19 {ECO:0000303|PubMed:19920209}; AltName: Full=Protein DOUBLE B-BOX 1B; AltName: Full=Protein SALT TOLERANCE HOMOLOG 5;	SubName: Full=Uncharacterized protein {ECO:0000313|EMBL:KRH76689.1};	--	GO:0005634,nucleus; GO:0000989,NA; GO:0008270,zinc ion binding; GO:0010100,negative regulation of photomorphogenesis; GO:0006355,regulation of transcription, DNA-templated; GO:0006351,transcription, DNA-templated	PF00643.24:B-box zinc finger
Glyma.01G168600	3	Chr01	50620709	50629264	--	--	PREDICTED: UPF0183 protein At3g51130 isoform X2 [Glycine max]	RecName: Full=UPF0183 protein At3g51130;	SubName: Full=Uncharacterized protein {ECO:0000313|EMBL:KRH76696.1};	Uncharacterized conserved protein	--	PF03676.14:Uncharacterised protein family (UPF0183)
Glyma.01G169500	7	Chr01	50701453	50703401	K13420 LRR receptor-like serine/threonine-protein kinase FLS2 [EC:2.7.11.1] | (RefSeq) LRR receptor-like serine/threonine-protein kinase EFR (A)	ko04016: MAPK signaling pathway - plant; ko04626: Plant-pathogen interaction	PREDICTED: leucine-rich repeat receptor-like protein kinase PXL2 [Glycine max]	RecName: Full=Putative leucine-rich repeat receptor-like serine/threonine-protein kinase At3g53590; EC=2.7.11.1; Flags: Precursor;	SubName: Full=Uncharacterized protein {ECO:0000313|EMBL:KRH76706.1, ECO:0000313|EnsemblPlants:GLYMA01G37460.1};	FOG: Leucine rich repeat	GO:0016021,integral component of membrane; GO:0005886,plasma membrane; GO:0005524,ATP binding; GO:0004674,protein serine/threonine kinase activity	PF13855.6:Leucine rich repeat
Glyma.02G111100	5	Chr02	10711848	10714045	--	--	hypothetical protein GLYMA_02G111100 [Glycine max]	--	SubName: Full=Uncharacterized protein {ECO:0000313|EMBL:KRH70790.1};	--	GO:0016021,integral component of membrane	--
Glyma.01G170000	1	Chr01	50743009	50750309	K12637 3-epi-6-deoxocathasterone 23-monooxygenase [EC:1.14.14.147] | (RefSeq) 3-epi-6-deoxocathasterone 23-monooxygenase CYP90C1-like (A)	ko00905: Brassinosteroid biosynthesis	hypothetical protein GLYMA_01G170000 [Glycine max]	RecName: Full=3-epi-6-deoxocathasterone 23-monooxygenase; EC=1.14.13.112; AltName: Full=Cytochrome P450 90C1; AltName: Full=Protein ROTUNDIFOLIA 3;	SubName: Full=Uncharacterized protein {ECO:0000313|EMBL:KRH76714.1, ECO:0000313|EnsemblPlants:GLYMA01G37510.2};	Cytochrome P450 CYP4/CYP19/CYP26 subfamilies	GO:0005789,endoplasmic reticulum membrane; GO:0016021,integral component of membrane; GO:0102097,(22S)-22-hydroxy-5alpha-campestan-3-one C-23 hydroxylase activity; GO:0020037,heme binding; GO:0005506,iron ion binding; GO:0016709,oxidoreductase activity, acting on paired donors, with incorporation or reduction of molecular oxygen, NAD(P)H as one donor, and incorporation of one atom of oxygen; GO:0…	PF00067.22:Cytochrome P450
Glyma.02G118500	5	Chr02	11677001	11682244	--	--	PREDICTED: ninja-family protein AFP2-like [Glycine max]	RecName: Full=Ninja-family protein AFP2; AltName: Full=ABI five-binding protein 2; Short=ABI5-binding protein 2;	SubName: Full=Uncharacterized protein {ECO:0000313|EMBL:KRH70923.1, ECO:0000313|EnsemblPlants:GLYMA02G13120.1};	--	GO:0005634,nucleus; GO:0009737,response to abscisic acid; GO:0009414,response to water deprivation; GO:0007165,signal transduction	PF16136.5:Putative nuclear localisation signal
Glyma.01G170300	10	Chr01	50770157	50773422	K03671 thioredoxin 1 | (RefSeq) thioredoxin H1-like (A)	--	thioredoxin h1 [Glycine max]	RecName: Full=Thioredoxin H-type; Short=Trx-H;	RecName: Full=Thioredoxin {ECO:0000256|PIRNR:PIRNR000077};	Thioredoxin	GO:0005737,cytoplasm; GO:0015035,protein disulfide oxidoreductase activity; GO:0045454,cell redox homeostasis; GO:0006662,glycerol ether metabolic process	PF00085.20:Thioredoxin
Glyma.01G171100	2	Chr01	50837778	50841119	K00430 peroxidase [EC:1.11.1.7] | (RefSeq) peroxidase 72-like (A)	ko00940: Phenylpropanoid biosynthesis	PREDICTED: peroxidase 72-like [Glycine max]	RecName: Full=Peroxidase 72; Short=Atperox P72; EC=1.11.1.7; AltName: Full=ATP6a; AltName: Full=PRXR8; Flags: Precursor;	RecName: Full=Peroxidase {ECO:0000256|RuleBase:RU362060, ECO:0000256|SAAS:SAAS00709852}; EC=1.11.1.7 {ECO:0000256|RuleBase:RU362060, ECO:0000256|SAAS:SAAS00709852};	--	GO:0005576,extracellular region; GO:0020037,heme binding; GO:0046872,metal ion binding; GO:0004601,peroxidase activity; GO:0042744,hydrogen peroxide catabolic process; GO:0009809,lignin biosynthetic process; GO:0006979,response to oxidative stress	PF00141.23:Peroxidase
Glyma.01G171400	10	Chr01	50866824	50870517	K08900 mitochondrial chaperone BCS1 | (RefSeq) protein HYPER-SENSITIVITY-RELATED 4-like (A)	--	PREDICTED: mitochondrial chaperone BCS1-like [Glycine max]	RecName: Full=AAA-ATPase At5g17760; EC=3.6.1.3 {ECO:0000250|UniProtKB:Q9FLD5};	SubName: Full=Uncharacterized protein {ECO:0000313|EMBL:KRH76740.1, ECO:0000313|EnsemblPlants:GLYMA01G37670.1};	AAA+-type ATPase	GO:0016021,integral component of membrane; GO:0005886,plasma membrane; GO:0005524,ATP binding; GO:0016887,ATPase activity	PF14363.6:Domain associated at C-terminal with AAA
Glyma.01G171700	8	Chr01	50895374	50896407	--	--	PREDICTED: uncharacterized protein LOC102670210 [Glycine max]	--	SubName: Full=Uncharacterized protein {ECO:0000313|EMBL:KRH76743.1, ECO:0000313|EnsemblPlants:GLYMA01G37690.2};	--	GO:0016021,integral component of membrane	PF00520.31:Ion transport protein
Glyma.01G171900	6	Chr01	50912520	50915454	K19355 mannan endo-1,4-beta-mannosidase [EC:3.2.1.78] | (RefSeq) mannan endo-1,4-beta-mannosidase 7-like (A)	ko00051: Fructose and mannose metabolism	hypothetical protein GLYMA_01G171900 [Glycine max]	RecName: Full=Mannan endo-1,4-beta-mannosidase 7; EC=3.2.1.78; AltName: Full=Beta-mannanase 7; AltName: Full=Endo-beta-1,4-mannanase 7; Short=AtMAN7; Flags: Precursor;	SubName: Full=Uncharacterized protein {ECO:0000313|EMBL:KRH76746.1, ECO:0000313|EnsemblPlants:GLYMA01G37720.1};	--	GO:0071944,cell periphery; GO:0005576,extracellular region; GO:0016985,mannan endo-1,4-beta-mannosidase activity; GO:0046355,mannan catabolic process; GO:0009845,seed germination	PF00150.18:Cellulase (glycosyl hydrolase family 5)
Glyma.01G172400	6	Chr01	50956072	50958961	K01507 inorganic pyrophosphatase [EC:3.6.1.1] | (RefSeq) soluble inorganic pyrophosphatase 1-like (A)	ko00190: Oxidative phosphorylation	hypothetical protein GLYMA_01G172400 [Glycine max]	RecName: Full=Soluble inorganic pyrophosphatase 1 {ECO:0000303|PubMed:15135060}; EC=3.6.1.1 {ECO:0000269|Ref.9}; AltName: Full=Pyrophosphate phospho-hydrolase 1 {ECO:0000303|PubMed:15135060}; Short=PPase 1 {ECO:0000303|PubMed:15135060};	SubName: Full=Uncharacterized protein {ECO:0000313|EMBL:KRH76756.1, ECO:0000313|EnsemblPlants:GLYMA01G37790.1};	Inorganic pyrophosphatase/Nucleosome remodeling factor, subunit NURF38	GO:0005737,cytoplasm; GO:0005829,cytosol; GO:0005634,nucleus; GO:0004427,inorganic diphosphatase activity; GO:0000287,magnesium ion binding; GO:0019915,lipid storage; GO:0006796,phosphate-containing compound metabolic process	PF00719.19:Inorganic pyrophosphatase
Glyma.01G172600	9	Chr01	50980302	50982573	K13266 pterocarpan reductase [EC:1.23.1.-] | (Kazusa) Lj3g3v3360930.1; - (A)	ko00943: Isoflavonoid biosynthesis	NADPH:isoflavone reductase [Glycine max]	RecName: Full=Isoflavone reductase; Short=IFR; EC=1.3.1.45; AltName: Full=2'-hydroxyisoflavone reductase; AltName: Full=NADPH:isoflavone oxidoreductase;	SubName: Full=Uncharacterized protein {ECO:0000313|EMBL:KRH76759.1, ECO:0000313|EnsemblPlants:GLYMA01G37810.1};	--	GO:0047526,2'-hydroxyisoflavone reductase activity	PF05368.13:NmrA-like family
Glyma.01G172800	3	Chr01	51016154	51018392	K13266 pterocarpan reductase [EC:1.23.1.-] | (Kazusa) Lj1g3v2124770.1; - (A)	ko00943: Isoflavonoid biosynthesis	PREDICTED: isoflavone reductase-like protein [Glycine max]	RecName: Full=Isoflavone reductase homolog TP7 {ECO:0000305}; EC=1.3.1.- {ECO:0000269|PubMed:12369619}; AltName: Full=Phenylcoumaran benzylic ether reductase TP7 {ECO:0000305}; Short=NtPCBER {ECO:0000305}; AltName: Full=Protein TOBACCO PETAL 7 {ECO:0000305};	SubName: Full=Uncharacterized protein {ECO:0000313|EMBL:KRH76762.1, ECO:0000313|EnsemblPlants:GLYMA01G37840.1};	--	GO:0050664,oxidoreductase activity, acting on NAD(P)H, oxygen as acceptor; GO:0009807,lignan biosynthetic process	PF05368.13:NmrA-like family
Glyma.01G172900	7	Chr01	51020276	51022436	K13266 pterocarpan reductase [EC:1.23.1.-] | (Kazusa) Lj3g3v3360930.1; - (A)	ko00943: Isoflavonoid biosynthesis	PREDICTED: isoflavone reductase-like protein [Glycine max]	RecName: Full=Isoflavone reductase-like protein; EC=1.3.1.-; AltName: Full=Pollen allergen Ole e 12.01; AltName: Allergen=Ole e 12.01;	SubName: Full=Uncharacterized protein {ECO:0000313|EMBL:KRH76763.1};	--	GO:0005737,cytoplasm; GO:0016491,oxidoreductase activity	PF05368.13:NmrA-like family
Glyma.01G173000	8	Chr01	51026937	51029581	K02201 pantetheine-phosphate adenylyltransferase [EC:2.7.7.3] | (RefSeq) phosphopantetheine adenylyltransferase-like (A)	ko00770: Pantothenate and CoA biosynthesis	hypothetical protein GLYMA_01G173000 [Glycine max]	RecName: Full=Phosphopantetheine adenylyltransferase; EC=2.7.7.3; AltName: Full=AtCoaD; AltName: Full=Dephospho-CoA pyrophosphorylase; AltName: Full=Pantetheine-phosphate adenylyltransferase;	SubName: Full=Uncharacterized protein {ECO:0000313|EMBL:KRH76766.1};	Uncharacterized conserved protein	GO:0005829,cytosol; GO:0005524,ATP binding; GO:0004595,pantetheine-phosphate adenylyltransferase activity; GO:0015937,coenzyme A biosynthetic process; GO:0040007,growth; GO:0006629,lipid metabolic process; GO:0019915,lipid storage; GO:0080020,regulation of coenzyme A biosynthetic process; GO:0006970,response to osmotic stress; GO:0009651,response to salt stress	PF05705.14:Eukaryotic protein of unknown function (DUF829)
Glyma.01G173400	3	Chr01	51043597	51046132	K10615 E3 ubiquitin-protein ligase HERC4 [EC:2.3.2.26] | (RefSeq) probable E3 ubiquitin-protein ligase HERC4 isoform X1 (A)	ko04120: Ubiquitin mediated proteolysis	PREDICTED: probable E3 ubiquitin-protein ligase HERC3 [Glycine max]	RecName: Full=Ultraviolet-B receptor UVR8; AltName: Full=Protein UV-B RESISTANCE 8; AltName: Full=RCC1 domain-containing protein UVR8;	SubName: Full=Uncharacterized protein {ECO:0000313|EMBL:KRH76771.1, ECO:0000313|EnsemblPlants:GLYMA01G37910.1};	FOG: RCC1 domain	GO:0000785,chromatin; GO:0005829,cytosol; GO:0005634,nucleus; GO:0003682,chromatin binding; GO:0005085,guanyl-nucleotide exchange factor activity; GO:0042802,identical protein binding; GO:0009881,photoreceptor activity; GO:0042803,protein homodimerization activity; GO:0009649,entrainment of circadian clock; GO:0018298,protein-chromophore linkage; GO:0009411,response to UV; GO:0010224,response to …	PF00415.18:Regulator of chromosome condensation (RCC1) repeat
Glyma.01G174900	8	Chr01	51146609	51148979	K03124 transcription initiation factor TFIIB | (RefSeq) uncharacterized LOC102662353 (A)	ko03022: Basal transcription factors	PREDICTED: uncharacterized protein LOC102662353 [Glycine max]	RecName: Full=Plant-specific TFIIB-related protein 1 {ECO:0000305}; AltName: Full=Plant-specific TFIIB-related protein {ECO:0000303|PubMed:12697827}; Short=AtPBRP {ECO:0000303|PubMed:12697827}; AltName: Full=TFIIB-related protein PBRP1 {ECO:0000305};	SubName: Full=Uncharacterized protein {ECO:0000313|EMBL:KRH76795.1, ECO:0000313|EnsemblPlants:GLYMA01G38090.1};	Transcription initiation factor TFIIB	GO:0009707,chloroplast outer membrane; GO:0005634,nucleus; GO:0009527,plastid outer membrane; GO:0046872,metal ion binding; GO:0000182,rDNA binding; GO:0017025,TBP-class protein binding; GO:0070897,transcription preinitiation complex assembly; GO:0006355,regulation of transcription, DNA-templated	PF00382.19:Transcription factor TFIIB repeat
Glyma.01G175200	3	Chr01	51171930	51176589	K11996 adenylyltransferase and sulfurtransferase [EC:2.7.7.80 2.8.1.11] | (RefSeq) adenylyltransferase and sulfurtransferase MOCS3-like (A)	ko04122: Sulfur relay system	PREDICTED: uncharacterized protein LOC100801441 [Glycine max]	RecName: Full=Sulfite exporter TauE/SafE family protein 3 {ECO:0000312|EMBL:AEC07746.1};	SubName: Full=Uncharacterized protein {ECO:0000313|EMBL:KRH76799.1, ECO:0000313|EnsemblPlants:GLYMA01G38130.1};	--	GO:0016021,integral component of membrane	PF01925.19:Sulfite exporter TauE/SafE
Glyma.02G126600	5	Chr02	12715358	12717039	--	--	PREDICTED: uncharacterized protein LOC102670075 [Glycine max]	--	SubName: Full=Uncharacterized protein {ECO:0000313|EMBL:KRH71059.1, ECO:0000313|EnsemblPlants:GLYMA02G14021.2};	--	GO:0009690,cytokinin metabolic process	--
Glyma.01G176200	12	Chr01	51279619	51281582	--	--	hypothetical protein GLYMA_01G176200 [Glycine max]	--	SubName: Full=Uncharacterized protein {ECO:0000313|EMBL:KRH76823.1};	--	--	--
Glyma.01G176600	9	Chr01	51330379	51334194	K12309 beta-galactosidase [EC:3.2.1.23] | (Kazusa) Lj3g3v0323160.1; - (A)	ko00052: Galactose metabolism; ko00511: Other glycan degradation; ko00531: Glycosaminoglycan degradation; ko00600: Sphingolipid metabolism; ko00604: Glycosphingolipid biosynthesis - ganglio series	PREDICTED: protein indeterminate-domain 2-like [Glycine max]	RecName: Full=Protein indeterminate-domain 1 {ECO:0000303|PubMed:16784536}; AltName: Full=Protein ENHYDROUS {ECO:0000303|PubMed:21571950};	SubName: Full=Uncharacterized protein {ECO:0000313|EMBL:KRH76829.1, ECO:0000313|EnsemblPlants:GLYMA01G38290.1};	FOG: Zn-finger	GO:0005634,nucleus; GO:0003700,DNA-binding transcription factor activity; GO:0046872,metal ion binding; GO:0044212,transcription regulatory region DNA binding; GO:0009937,regulation of gibberellic acid mediated signaling pathway; GO:0010029,regulation of seed germination; GO:0006355,regulation of transcription, DNA-templated; GO:0010431,seed maturation; GO:0006351,transcription, DNA-templated	PF00096.26:Zinc finger, C2H2 type
Glyma.02G139800	5	Chr02	14501287	14503793	K08332 vacuolar protein 8 | (RefSeq) U-box domain-containing protein 4 (A)	--	PREDICTED: U-box domain-containing protein 7-like [Glycine max]	RecName: Full=U-box domain-containing protein 7; EC=2.3.2.27; AltName: Full=Plant U-box protein 7; AltName: Full=RING-type E3 ubiquitin transferase PUB7 {ECO:0000305};	SubName: Full=Uncharacterized protein {ECO:0000313|EMBL:KRH71298.1, ECO:0000313|EnsemblPlants:GLYMA02G15790.1};	FOG: Armadillo/beta-catenin-like repeats	GO:0004842,ubiquitin-protein transferase activity	PF00514.23:Armadillo/beta-catenin-like repeat
Glyma.01G177200	10	Chr01	51367500	51369576	K14494 DELLA protein | (RefSeq) DELLA protein GAI-like (A)	ko04075: Plant hormone signal transduction	PREDICTED: scarecrow-like protein 15 [Glycine max]	RecName: Full=Scarecrow-like protein 15; Short=AtSCL15; AltName: Full=GRAS family protein 25; Short=AtGRAS-25;	SubName: Full=Uncharacterized protein {ECO:0000313|EMBL:KRH76844.1, ECO:0000313|EnsemblPlants:GLYMA01G38360.1};	--	GO:0005634,nucleus; GO:0003700,DNA-binding transcription factor activity; GO:0043565,sequence-specific DNA binding; GO:0030154,cell differentiation; GO:0048831,regulation of shoot system development; GO:0006355,regulation of transcription, DNA-templated; GO:0006351,transcription, DNA-templated	PF03514.14:GRAS domain family
Glyma.01G177300	6	Chr01	51373336	51377457	K17279 receptor expression-enhancing protein 5/6 | (RefSeq) HVA22-like protein k (A)	--	PREDICTED: HVA22-like protein k [Glycine max]	RecName: Full=HVA22-like protein k; Short=AtHVA22k;	RecName: Full=HVA22-like protein {ECO:0000256|RuleBase:RU362006};	Protein involved in membrane traffic (YOP1/TB2/DP1/HVA22 family)	--	PF03134.19:TB2/DP1, HVA22 family
Glyma.01G177400	9	Chr01	51377575	51385172	K09060 plant G-box-binding factor | (RefSeq) G-box-binding factor 1-like isoform X1 (A)	--	G-box-binding factor 1 [Glycine soja]	RecName: Full=G-box-binding factor 1; Short=AtGBF1; AltName: Full=bZIP transcription factor 41; Short=AtbZIP41;	SubName: Full=Uncharacterized protein {ECO:0000313|EMBL:KRH76850.1, ECO:0000313|EnsemblPlants:GLYMA01G38381.3};	--	GO:0005737,cytoplasm; GO:0005634,nucleus; GO:0003700,DNA-binding transcription factor activity; GO:0043565,sequence-specific DNA binding; GO:0044212,transcription regulatory region DNA binding; GO:0006351,transcription, DNA-templated	PF07777.11:G-box binding protein MFMR
Glyma.01G177600	6	Chr01	51408059	51410519	K03809 NAD(P)H dehydrogenase (quinone) [EC:1.6.5.2] | (RefSeq) probable NAD(P)H dehydrogenase (quinone) FQR1-like 2 (A)	ko00130: Ubiquinone and other terpenoid-quinone biosynthesis	PREDICTED: probable NAD(P)H dehydrogenase (quinone) FQR1-like 2 [Glycine max]	RecName: Full=Probable NAD(P)H dehydrogenase (quinone) FQR1-like 2 {ECO:0000305}; EC=1.6.5.2 {ECO:0000250|UniProtKB:Q9LSQ5};	SubName: Full=Uncharacterized protein {ECO:0000313|EMBL:KRH76854.1, ECO:0000313|EnsemblPlants:GLYMA01G38400.1};	1,4-benzoquinone reductase-like; Trp repressor binding protein-like/protoplast-secreted protein	GO:0005737,cytoplasm; GO:0005886,plasma membrane; GO:0010181,FMN binding; GO:0003955,NAD(P)H dehydrogenase (quinone) activity	PF03358.15:NADPH-dependent FMN reductase
Glyma.01G177700	1	Chr01	51414242	51418147	K01262 Xaa-Pro aminopeptidase [EC:3.4.11.9] | (RefSeq) aminopeptidase P1-like (A)	--	hypothetical protein GLYMA_01G177700 [Glycine max]	--	SubName: Full=Uncharacterized protein {ECO:0000313|EMBL:KRH76855.1, ECO:0000313|EnsemblPlants:GLYMA01G38410.1};	Xaa-Pro aminopeptidase	GO:0046872,metal ion binding; GO:0070006,metalloaminopeptidase activity	PF16189.5:Creatinase/Prolidase N-terminal domain
Glyma.02G145700	5	Chr02	15053070	15057124	--	--	hypothetical protein GLYMA_02G145700 [Glycine max]	RecName: Full=Sucrose-binding protein; Short=SBP; Flags: Precursor;	SubName: Full=Uncharacterized protein {ECO:0000313|EMBL:KRH71397.1, ECO:0000313|EnsemblPlants:GLYMA02G16440.1};	--	GO:0016020,membrane; GO:0045735,nutrient reservoir activity; GO:0008643,carbohydrate transport	PF00190.22:Cupin
Glyma.02G167700	5	Chr02	25824020	25826488	--	--	PREDICTED: universal stress protein A-like protein [Glycine max]	RecName: Full=Universal stress protein A-like protein;	SubName: Full=Universal stress protein A-like protein {ECO:0000313|EMBL:KHN00015.1};	--	GO:0005886,plasma membrane; GO:0016208,AMP binding; GO:0006950,response to stress	PF00582.26:Universal stress protein family
Glyma.01G178700	9	Chr01	51480901	51482977	K20893 probable galacturonosyltransferase-like 1 [EC:2.4.1.-] | (RefSeq) probable galacturonosyltransferase-like 2 (A)	--	PREDICTED: probable galacturonosyltransferase-like 2 [Glycine max]	RecName: Full=Probable galacturonosyltransferase-like 2; EC=2.4.1.-;	RecName: Full=Hexosyltransferase {ECO:0000256|RuleBase:RU362027}; EC=2.4.1.- {ECO:0000256|RuleBase:RU362027};	--	GO:0005794,Golgi apparatus; GO:0000139,Golgi membrane; GO:0016021,integral component of membrane; GO:0047262,polygalacturonate 4-alpha-galacturonosyltransferase activity; GO:0016757,transferase activity, transferring glycosyl groups; GO:0071555,cell wall organization; GO:0045489,pectin biosynthetic process; GO:0000271,polysaccharide biosynthetic process	PF01501.20:Glycosyl transferase family 8
Glyma.02G184400	5	Chr02	32182032	32187403	K03032 26S proteasome regulatory subunit N2 | (RefSeq) 26S proteasome non-ATPase regulatory subunit 1 homolog A-like (A)	ko03050: Proteasome	hypothetical protein GLYMA_02G184400 [Glycine max]	RecName: Full=26S proteasome non-ATPase regulatory subunit 1 homolog A; AltName: Full=26S proteasome regulatory subunit RPN2a; Short=AtRPN2a; AltName: Full=26S proteasome regulatory subunit S1 homolog A;	SubName: Full=Uncharacterized protein {ECO:0000313|EMBL:KRH72001.1, ECO:0000313|EnsemblPlants:GLYMA02G32058.1};	26S proteasome regulatory complex, subunit RPN2/PSMD1	GO:0005829,cytosol; GO:0005634,nucleus; GO:0000502,proteasome complex; GO:0008540,proteasome regulatory particle, base subcomplex; GO:0034515,proteasome storage granule; GO:0030234,enzyme regulator activity; GO:0043161,proteasome-mediated ubiquitin-dependent protein catabolic process; GO:0042176,regulation of protein catabolic process	--
Glyma.02G205600	5	Chr02	39063784	39066052	K03283 heat shock 70kDa protein 1/2/6/8 | (RefSeq) heat shock 70 kDa protein-like (A)	ko03040: Spliceosome; ko04141: Protein processing in endoplasmic reticulum; ko04144: Endocytosis	PREDICTED: heat shock 70 kDa protein-like [Glycine max]	RecName: Full=Heat shock 70 kDa protein;	SubName: Full=Uncharacterized protein {ECO:0000313|EMBL:KRH72327.1, ECO:0000313|EnsemblPlants:GLYMA02G36700.1};	Molecular chaperones HSP70/HSC70, HSP70 superfamily	GO:0005524,ATP binding	PF00012.20:Hsp70 protein
Glyma.01G180300	1	Chr01	51663946	51664685	--	--	hypothetical protein glysoja_003294 [Glycine soja]	--	SubName: Full=Uncharacterized protein {ECO:0000313|EMBL:KRH76903.1, ECO:0000313|EnsemblPlants:GLYMA01G38686.1};	--	--	--
Glyma.02G216200	5	Chr02	40302026	40302737	--	--	PREDICTED: uncharacterized protein LOC100815148 [Glycine max]	--	SubName: Full=Uncharacterized protein {ECO:0000313|EMBL:KRH72483.1, ECO:0000313|EnsemblPlants:GLYMA02G38041.1};	--	--	--
Glyma.01G180700	9	Chr01	51694484	51696726	--	--	uncharacterized protein LOC100819922 [Glycine max]	RecName: Full=CASP-like protein ARALYDRAFT_485429;	RecName: Full=CASP-like protein {ECO:0000256|RuleBase:RU361233};	--	GO:0016021,integral component of membrane; GO:0005886,plasma membrane	PF04535.12:Domain of unknown function (DUF588)
Glyma.01G181000	12	Chr01	51703710	51704994	--	--	hypothetical protein GLYMA_01G181000 [Glycine max]	--	SubName: Full=Uncharacterized protein {ECO:0000313|EMBL:KRH76913.1};	--	GO:0016021,integral component of membrane	--
Glyma.02G220200	5	Chr02	40807826	40809751	--	--	hypothetical protein GLYMA_02G220200 [Glycine max]	--	SubName: Full=Uncharacterized protein {ECO:0000313|EMBL:KRH72559.1, ECO:0000313|EnsemblPlants:GLYMA02G38475.1};	--	GO:0016021,integral component of membrane	--
Glyma.01G182400	9	Chr01	51801143	51807504	K13430 serine/threonine-protein kinase PBS1 [EC:2.7.11.1] | (RefSeq) serine/threonine-protein kinase CDL1 (A)	ko04626: Plant-pathogen interaction	PREDICTED: wall-associated receptor kinase-like 14 [Glycine max]	RecName: Full=Wall-associated receptor kinase-like 14; EC=2.7.11.-; Flags: Precursor;	SubName: Full=Uncharacterized protein {ECO:0000313|EMBL:KRH76928.1, ECO:0000313|EnsemblPlants:GLYMA01G38920.1};	Serine/threonine protein kinase	GO:0016021,integral component of membrane; GO:0005886,plasma membrane; GO:0005524,ATP binding; GO:0004674,protein serine/threonine kinase activity; GO:0007166,cell surface receptor signaling pathway	PF07714.17:Protein tyrosine kinase
Glyma.02G234800	5	Chr02	42228835	42231757	K07198 5'-AMP-activated protein kinase, catalytic alpha subunit [EC:2.7.11.11] | (RefSeq) CBL-interacting serine/threonine-protein kinase 10 (A)	--	PREDICTED: CBL-interacting serine/threonine-protein kinase 10-like [Glycine max]	RecName: Full=CBL-interacting serine/threonine-protein kinase 10; EC=2.7.11.1; AltName: Full=SNF1-related kinase 3.8; AltName: Full=SOS2-like protein kinase PKS2; AltName: Full=SOS3-interacting protein 1;	RecName: Full=Non-specific serine/threonine protein kinase {ECO:0000256|SAAS:SAAS00351747}; EC=2.7.11.1 {ECO:0000256|SAAS:SAAS00351747};	Serine/threonine protein kinase	GO:0005622,intracellular; GO:0005524,ATP binding; GO:0004674,protein serine/threonine kinase activity; GO:0035556,intracellular signal transduction; GO:0018105,peptidyl-serine phosphorylation; GO:0018107,peptidyl-threonine phosphorylation	PF00069.25:Protein kinase domain
Glyma.01G182700	2	Chr01	51814214	51822884	K20802 (R)-mandelonitrile lyase [EC:4.1.2.10] | (RefSeq) (S)-hydroxynitrile lyase-like (A)	ko00460: Cyanoamino acid metabolism	PREDICTED: methylesterase 3-like isoform X1 [Glycine max]	RecName: Full=Methylesterase 3; Short=AtMES3; EC=3.1.1.-;	SubName: Full=Uncharacterized protein {ECO:0000313|EMBL:KRH76932.1, ECO:0000313|EnsemblPlants:GLYMA01G38950.2};	--	GO:0016788,hydrolase activity, acting on ester bonds; GO:0080030,methyl indole-3-acetate esterase activity; GO:0080032,methyl jasmonate esterase activity	PF12697.7:Alpha/beta hydrolase family
Glyma.02G241000	5	Chr02	42928962	42932788	K12133 MYB-related transcription factor LHY | (RefSeq) protein LHY-like isoform X1 (A)	ko04712: Circadian rhythm - plant	PREDICTED: protein REVEILLE 1 [Glycine max]	RecName: Full=Protein REVEILLE 1;	SubName: Full=MYB/HD-like transcription factor {ECO:0000313|EMBL:ALA09205.1};	Zuotin and related molecular chaperones (DnaJ superfamily), contains DNA-binding domains	GO:0005634,nucleus; GO:0003677,DNA binding; GO:0003700,DNA-binding transcription factor activity; GO:0009851,auxin biosynthetic process; GO:0009734,auxin-activated signaling pathway; GO:0007623,circadian rhythm; GO:0010600,regulation of auxin biosynthetic process; GO:0006355,regulation of transcription, DNA-templated; GO:0006351,transcription, DNA-templated	PF00249.31:Myb-like DNA-binding domain
Glyma.01G183300	2	Chr01	51854823	51858498	K13459 disease resistance protein RPS2 | (RefSeq) NB-ARC domain disease resistance protein (A)	ko04626: Plant-pathogen interaction	PREDICTED: probable disease resistance protein At5g66900 [Glycine max]	RecName: Full=Probable disease resistance protein At5g66900;	SubName: Full=Uncharacterized protein {ECO:0000313|EMBL:KRH76939.1, ECO:0000313|EnsemblPlants:GLYMA01G39000.1};	--	GO:0043531,ADP binding; GO:0005524,ATP binding; GO:0006952,defense response	PF00931.22:NB-ARC domain
Glyma.01G184600	1	Chr01	51992679	51997270	K14506 jasmonic acid-amino synthetase [EC:6.3.2.52] | (RefSeq) uncharacterized LOC109115461 (A)	ko04075: Plant hormone signal transduction	PREDICTED: uncharacterized protein LOC100794704 isoform X2 [Glycine max]	--	SubName: Full=Uncharacterized protein {ECO:0000313|EMBL:KRH76966.1, ECO:0000313|EnsemblPlants:GLYMA01G39120.2};	--	--	PF04784.14:Protein of unknown function, DUF547
Glyma.01G184900	10	Chr01	52033558	52034215	--	--	hypothetical protein glysoja_003339 [Glycine soja]	RecName: Full=Precursor of CEP3 {ECO:0000303|PubMed:24179096}; Short=PCEP3 {ECO:0000303|PubMed:24179096}; Contains: RecName: Full=C-terminally encoded peptide 3 {ECO:0000303|PubMed:24179096}; Short=CEP3 {ECO:0000303|PubMed:24179096}; Flags: Precursor;	SubName: Full=Uncharacterized protein {ECO:0000313|EMBL:KRH76986.1, ECO:0000313|EnsemblPlants:GLYMA01G39160.1};	--	GO:0048046,apoplast; GO:0005179,hormone activity; GO:0006995,cellular response to nitrogen starvation; GO:1902025,nitrate import; GO:2000023,regulation of lateral root development; GO:1901371,regulation of leaf morphogenesis; GO:2000280,regulation of root development; GO:0048831,regulation of shoot system development; GO:0009733,response to auxin; GO:0010037,response to carbon dioxide; GO:0009642…	--
Glyma.01G185600	9	Chr01	52105759	52106817	K13448 calcium-binding protein CML | (RefSeq) calmodulin-like protein 1-like (A)	ko04626: Plant-pathogen interaction	calcium-binding EF-hand family protein [Glycine max]	RecName: Full=Calmodulin-like protein 1;	SubName: Full=Uncharacterized protein {ECO:0000313|EMBL:ACU18954.1, ECO:0000313|EnsemblPlants:GLYMA01G39240.1};	Calmodulin and related proteins (EF-Hand superfamily)	GO:0005739,mitochondrion; GO:0005509,calcium ion binding	PF00036.32:EF hand
Glyma.01G185900	9	Chr01	52120880	52122994	--	--	PREDICTED: uncharacterized protein LOC100792074 [Glycine max]	--	SubName: Full=Uncharacterized protein {ECO:0000313|EMBL:KRH76999.1, ECO:0000313|EnsemblPlants:GLYMA01G39270.1};	FOG: PPR repeat	--	PF07939.11:Protein of unknown function (DUF1685)
Glyma.01G186300	2	Chr01	52174240	52177439	--	--	hypothetical protein GLYMA_01G186300 [Glycine max]	--	SubName: Full=Uncharacterized protein {ECO:0000313|EMBL:KRH77003.1, ECO:0000313|EnsemblPlants:GLYMA01G39320.1};	--	--	PF03763.13:Remorin, C-terminal region
Glyma.02G252800	5	Chr02	44009114	44009828	K13993 HSP20 family protein | (RefSeq) 18.2 kDa class I heat shock protein-like (A)	ko04141: Protein processing in endoplasmic reticulum	PREDICTED: 18.2 kDa class I heat shock protein [Glycine max]	RecName: Full=18.2 kDa class I heat shock protein;	SubName: Full=18.2 kDa class I heat shock protein {ECO:0000313|EMBL:KHN13097.1};	Molecular chaperone (small heat-shock protein Hsp26/Hsp42)	GO:0005737,cytoplasm	PF00011.21:Hsp20/alpha crystallin family
Glyma.01G187300	8	Chr01	52241208	52245640	K13430 serine/threonine-protein kinase PBS1 [EC:2.7.11.1] | (RefSeq) probable serine/threonine-protein kinase PBL7 (A)	ko04626: Plant-pathogen interaction	PREDICTED: probable serine/threonine-protein kinase At1g01540 [Glycine max]	RecName: Full=Probable serine/threonine-protein kinase At1g01540; EC=2.7.11.1;	SubName: Full=Uncharacterized protein {ECO:0000313|EMBL:KRH77013.1, ECO:0000313|EnsemblPlants:GLYMA01G39420.1};	Serine/threonine protein kinase	GO:0016021,integral component of membrane; GO:0005886,plasma membrane; GO:0005524,ATP binding; GO:0004674,protein serine/threonine kinase activity; GO:0004675,transmembrane receptor protein serine/threonine kinase activity; GO:0007166,cell surface receptor signaling pathway; GO:0046777,protein autophosphorylation; GO:0006468,protein phosphorylation	PF00069.25:Protein kinase domain
Glyma.01G187400	7	Chr01	52250433	52263914	K02320 DNA polymerase alpha subunit A [EC:2.7.7.7] | (RefSeq) DNA polymerase alpha catalytic subunit (A)	ko03030: DNA replication	PREDICTED: DNA polymerase alpha catalytic subunit [Glycine max]	RecName: Full=DNA polymerase alpha catalytic subunit; EC=2.7.7.7;	RecName: Full=DNA polymerase {ECO:0000256|RuleBase:RU000442}; EC=2.7.7.7 {ECO:0000256|RuleBase:RU000442};	DNA polymerase alpha, catalytic subunit	GO:0005658,alpha DNA polymerase:primase complex; GO:0008408,3'-5' exonuclease activity; GO:0051539,4 iron, 4 sulfur cluster binding; GO:0003677,DNA binding; GO:0003887,DNA-directed DNA polymerase activity; GO:0046872,metal ion binding; GO:0001882,nucleoside binding; GO:0000166,nucleotide binding; GO:0006303,double-strand break repair via nonhomologous end joining; GO:0006273,lagging strand elonga…	PF00136.21:DNA polymerase family B
Glyma.01G187700	7	Chr01	52284421	52286465	K00588 caffeoyl-CoA O-methyltransferase [EC:2.1.1.104] | (RefSeq) caffeoyl-CoA O-methyltransferase 5-like (A)	ko00940: Phenylpropanoid biosynthesis; ko00941: Flavonoid biosynthesis; ko00945: Stilbenoid, diarylheptanoid and gingerol biosynthesis	S-adenosyl-L-methionine-dependent methyltransferases superfamily protein [Glycine max]	RecName: Full=Caffeoyl-CoA O-methyltransferase 2; EC=2.1.1.104; AltName: Full=Trans-caffeoyl-CoA 3-O-methyltransferase 2; Short=CCoAMT-2; Short=CCoAOMT-2;	SubName: Full=Uncharacterized protein {ECO:0000313|EMBL:KRH77017.1, ECO:0000313|EnsemblPlants:GLYMA01G39460.1};	O-methyltransferase	GO:0042409,caffeoyl-CoA O-methyltransferase activity; GO:0046872,metal ion binding; GO:0009809,lignin biosynthetic process	PF01596.17:O-methyltransferase
Glyma.01G187900	7	Chr01	52294318	52298428	--	--	PREDICTED: PI-PLC X domain-containing protein At5g67130-like [Glycine max]	RecName: Full=PI-PLC X domain-containing protein At5g67130; Flags: Precursor;	SubName: Full=Uncharacterized protein {ECO:0000313|EMBL:KRH77019.1, ECO:0000313|EnsemblPlants:GLYMA01G39480.1};	--	GO:0046658,anchored component of plasma membrane; GO:0005886,plasma membrane; GO:0008081,phosphoric diester hydrolase activity; GO:0006629,lipid metabolic process	PF09478.10:Carbohydrate binding domain CBM49
Glyma.01G188100	8	Chr01	52316165	52318653	K12486 stromal membrane-associated protein | (RefSeq) probable ADP-ribosylation factor GTPase-activating protein AGD13 (A)	ko04144: Endocytosis	PREDICTED: uncharacterized protein LOC100800367 [Glycine max]	--	SubName: Full=Uncharacterized protein {ECO:0000313|EMBL:KRH77021.1, ECO:0000313|EnsemblPlants:GLYMA01G39500.1};	--	--	--
Glyma.01G188200	9	Chr01	52319258	52325798	--	--	PREDICTED: filament-like plant protein 7 isoform X2 [Glycine max]	RecName: Full=Filament-like plant protein 7; Short=AtFPP7;	SubName: Full=Uncharacterized protein {ECO:0000313|EMBL:KRH77023.1, ECO:0000313|EnsemblPlants:GLYMA01G39510.1};	--	--	PF05911.11:Filament-like plant protein, long coiled-coil
Glyma.01G188500	9	Chr01	52371281	52376567	K14595 abscisate beta-glucosyltransferase [EC:2.4.1.263] | (RefSeq) UDP-glucosyltransferase 73B2 (A)	ko00906: Carotenoid biosynthesis	PREDICTED: CBS domain-containing protein CBSX1, chloroplastic [Glycine max]	RecName: Full=CBS domain-containing protein CBSX1, chloroplastic; AltName: Full=CBS domain-containing protein 2; Short=AtCDCP2; AltName: Full=Protein LOSS OF THE TIMING OF ET AND JA BIOSYNTHESIS 2; Short=AtLEJ2; Flags: Precursor;	SubName: Full=Uncharacterized protein {ECO:0000313|EMBL:KRH77032.1, ECO:0000313|EnsemblPlants:GLYMA01G39530.1};	--	GO:0009507,chloroplast; GO:0045454,cell redox homeostasis	PF00571.28:CBS domain
Glyma.01G188600	9	Chr01	52377395	52379118	K09286 EREBP-like factor | (RefSeq) ethylene-responsive transcription factor ERF011-like (A)	--	DNA-binding domain-containing protein [Glycine max]	RecName: Full=Ethylene-responsive transcription factor ERF010;	SubName: Full=Uncharacterized protein {ECO:0000313|EMBL:KRH77034.1, ECO:0000313|EnsemblPlants:GLYMA01G39540.1};	--	GO:0005634,nucleus; GO:0003677,DNA binding; GO:0003700,DNA-binding transcription factor activity; GO:0009873,ethylene-activated signaling pathway; GO:0006351,transcription, DNA-templated	PF00847.20:AP2 domain
Glyma.01G189000	3	Chr01	52414650	52416227	K18801 glucuronoxylan 4-O-methyltransferase [EC:2.1.1.112] | (RefSeq) hypothetical protein (A)	--	PREDICTED: protein IRREGULAR XYLEM 15-like [Glycine max]	RecName: Full=Protein IRX15-LIKE;	SubName: Full=Uncharacterized protein {ECO:0000313|EMBL:KRH77040.1, ECO:0000313|EnsemblPlants:GLYMA01G39590.1};	--	GO:0005794,Golgi apparatus; GO:0000139,Golgi membrane; GO:0016021,integral component of membrane; GO:0009834,plant-type secondary cell wall biogenesis; GO:0045492,xylan biosynthetic process	PF04669.13:Polysaccharide biosynthesis
Glyma.01G189200	10	Chr01	52433139	52437026	K20871 putative beta-1,4-xylosyltransferase IRX14 [EC:2.4.2.-] | (RefSeq) probable beta-1,4-xylosyltransferase IRX14 (A)	--	PREDICTED: probable beta-1,4-xylosyltransferase IRX14 [Glycine max]	RecName: Full=Probable beta-1,4-xylosyltransferase IRX14H; EC=2.4.2.-; AltName: Full=Protein IRREGULAR XYLEM 14 homolog; AltName: Full=Xylan xylosyltransferase IRX14H;	RecName: Full=Glycosyltransferases {ECO:0000256|RuleBase:RU363127}; EC=2.4.-.- {ECO:0000256|RuleBase:RU363127};	Beta-1,3-glucuronyltransferase B3GAT1/SQV-8	GO:0005794,Golgi apparatus; GO:0000139,Golgi membrane; GO:0016021,integral component of membrane; GO:0015018,galactosylgalactosylxylosylprotein 3-beta-glucuronosyltransferase activity; GO:0042285,xylosyltransferase activity; GO:0071555,cell wall organization; GO:0010417,glucuronoxylan biosynthetic process; GO:0009834,plant-type secondary cell wall biogenesis	PF03360.16:Glycosyltransferase family 43
Glyma.02G258500	5	Chr02	44573990	44575371	--	--	hypothetical protein GLYMA_02G258500 [Glycine max]	--	SubName: Full=Uncharacterized protein {ECO:0000313|EMBL:KRH73208.1};	--	--	--
Glyma.01G189700	2	Chr01	52466590	52468770	K14505 cyclin D3, plant | (RefSeq) cyclin-D3-2-like (A)	ko04075: Plant hormone signal transduction	PREDICTED: cyclin-D3-2-like [Glycine max]	RecName: Full=Cyclin-D3-2; AltName: Full=G1/S-specific cyclin-D3-2; Short=CycD3;2;	SubName: Full=Uncharacterized protein {ECO:0000313|EMBL:KRH77050.1, ECO:0000313|EnsemblPlants:GLYMA01G39690.1};	G1/S-specific cyclin D	GO:0005634,nucleus; GO:0007049,cell cycle; GO:0051301,cell division; GO:0010444,guard mother cell differentiation; GO:0048316,seed development	PF00134.23:Cyclin, N-terminal domain
Glyma.01G189800	10	Chr01	52471826	52474286	K07937 ADP-ribosylation factor 1/2 | (RefSeq) ADP-ribosylation factor 2-like (A)	ko04144: Endocytosis	uncharacterized protein LOC100305887 [Glycine max]	RecName: Full=ADP-ribosylation factor 2;	SubName: Full=Uncharacterized protein {ECO:0000313|EMBL:ACU13788.1, ECO:0000313|EnsemblPlants:GLYMA01G39700.2};	GTP-binding ADP-ribosylation factor Arf1	GO:0005794,Golgi apparatus; GO:0005525,GTP binding; GO:0006886,intracellular protein transport; GO:0006471,protein ADP-ribosylation; GO:0007264,small GTPase mediated signal transduction; GO:0016192,vesicle-mediated transport	PF00025.21:ADP-ribosylation factor family
Glyma.01G190000	7	Chr01	52475965	52478086	K10436 microtubule-associated protein, RP/EB family | (RefSeq) microtubule-associated protein RP/EB family member 1C-like (A)	--	PREDICTED: microtubule-associated protein RP/EB family member 1C-like [Glycine max]	RecName: Full=Microtubule-associated protein RP/EB family member 1C; AltName: Full=APC-binding protein EB1C; AltName: Full=End-binding protein 1C; Short=AtEB1C; AltName: Full=Protein ATEB1 homolog 1; Short=AtEB1H1;	SubName: Full=Uncharacterized protein {ECO:0000313|EMBL:KRH77057.1, ECO:0000313|EnsemblPlants:GLYMA01G39720.1};	Microtubule-binding protein involved in cell cycle control	GO:0005618,cell wall; GO:0005874,microtubule; GO:0005730,nucleolus; GO:0005634,nucleus; GO:0009524,phragmoplast; GO:0005819,spindle; GO:0008017,microtubule binding; GO:0007049,cell cycle; GO:0051301,cell division; GO:0030865,cortical cytoskeleton organization; GO:0009652,thigmotropism	PF03271.17:EB1-like C-terminal motif
Glyma.02G260100	5	Chr02	44684684	44688689	K14207 solute carrier family 38 (sodium-coupled neutral amino acid transporter), member 2 | (RefSeq) sodium-coupled neutral amino acid transporter 2 (A)	--	PREDICTED: probable sodium-coupled neutral amino acid transporter 6 [Glycine max]	RecName: Full=Amino acid transporter AVT6C {ECO:0000305}; Short=AtAvt6C {ECO:0000303|PubMed:27925655};	SubName: Full=Uncharacterized protein {ECO:0000313|EMBL:KRH73226.1, ECO:0000313|EnsemblPlants:GLYMA02G42800.1};	Amino acid transporter protein	GO:0016021,integral component of membrane; GO:0015171,amino acid transmembrane transporter activity; GO:0003333,amino acid transmembrane transport	PF01490.18:Transmembrane amino acid transporter protein
Glyma.02G263900	5	Chr02	44926221	44930413	K13430 serine/threonine-protein kinase PBS1 [EC:2.7.11.1] | (RefSeq) serine/threonine-protein kinase PBS1-like (A)	ko04626: Plant-pathogen interaction	PREDICTED: probable inactive receptor-like protein kinase At3g56050 [Glycine max]	RecName: Full=Inactive receptor-like serine/threonine-protein kinase At2g40270; Flags: Precursor;	SubName: Full=Uncharacterized protein {ECO:0000313|EMBL:KRH73272.1, ECO:0000313|EnsemblPlants:GLYMA02G43150.1};	Serine/threonine protein kinase	GO:0016021,integral component of membrane; GO:0005886,plasma membrane; GO:0005524,ATP binding; GO:0004675,transmembrane receptor protein serine/threonine kinase activity; GO:0007166,cell surface receptor signaling pathway; GO:0006468,protein phosphorylation	PF07714.17:Protein tyrosine kinase
Glyma.01G190900	10	Chr01	52555621	52557449	--	--	Lysine-rich arabinogalactan protein 18 [Glycine soja]	--	SubName: Full=Uncharacterized protein {ECO:0000313|EMBL:KRH77067.1, ECO:0000313|EnsemblPlants:GLYMA01G39810.1};	--	--	--
Glyma.01G191200	4	Chr01	52585818	52587494	K05605 3-hydroxyisobutyryl-CoA hydrolase [EC:3.1.2.4] | (RefSeq) 3-hydroxyisobutyryl-CoA hydrolase-like protein 3, mitochondrial (A)	ko00280: Valine, leucine and isoleucine degradation; ko00410: beta-Alanine metabolism; ko00640: Propanoate metabolism; ko01200: Carbon metabolism	PREDICTED: probable esterase KAI2 [Glycine max]	RecName: Full=Probable esterase KAI2; AltName: Full=Protein DWARF-14-like; Short=Protein D14-like; AltName: Full=Protein HYPOSENSITIVE TO LIGHT; AltName: Full=Protein KARRIKIN INSENSITIVE 2;	SubName: Full=Uncharacterized protein {ECO:0000313|EMBL:KRH77071.1, ECO:0000313|EnsemblPlants:GLYMA01G39850.1};	--	GO:0005829,cytosol; GO:0005634,nucleus; GO:0016787,hydrolase activity; GO:0009704,de-etiolation; GO:0009640,photomorphogenesis; GO:0080167,response to karrikin	PF12697.7:Alpha/beta hydrolase family
Glyma.01G191400	9	Chr01	52602036	52603812	K03038 26S proteasome regulatory subunit N8 | (RefSeq) uncharacterized protein LOC105058033 (A)	ko03050: Proteasome	PREDICTED: uncharacterized protein LOC102660882 [Glycine max]	--	SubName: Full=Uncharacterized protein {ECO:0000313|EMBL:KRH77073.1, ECO:0000313|EnsemblPlants:GLYMA01G39870.2};	--	--	PF18695.1:Cytosolic phospholipases A2 C2-domain
Glyma.01G191600	3	Chr01	52614477	52617676	--	--	PREDICTED: uncharacterized protein LOC100811371 [Glycine max]	RecName: Full=Protein CONSERVED IN THE GREEN LINEAGE AND DIATOMS 27, chloroplastic {ECO:0000303|PubMed:23043051}; Flags: Precursor;	SubName: Full=Uncharacterized protein {ECO:0000313|EMBL:KRH77079.1, ECO:0000313|EnsemblPlants:GLYMA01G39890.1};	--	GO:0009507,chloroplast; GO:0016021,integral component of membrane; GO:1990641,response to iron ion starvation	PF06799.11:Conserved in the green lineage and diatoms 27
Glyma.01G191700	3	Chr01	52620932	52624637	K00472 prolyl 4-hydroxylase [EC:1.14.11.2] | (RefSeq) probable prolyl 4-hydroxylase 9 (A)	ko00330: Arginine and proline metabolism	PREDICTED: probable prolyl 4-hydroxylase 9 isoform X1 [Glycine max]	RecName: Full=Probable prolyl 4-hydroxylase 9 {ECO:0000305}; Short=AtP4H9 {ECO:0000303|Ref.6}; EC=1.14.11.2 {ECO:0000305};	SubName: Full=Uncharacterized protein {ECO:0000313|EMBL:KRH77080.1, ECO:0000313|EnsemblPlants:GLYMA01G39900.1};	Prolyl 4-hydroxylase alpha subunit	GO:0005789,endoplasmic reticulum membrane; GO:0005794,Golgi apparatus; GO:0016021,integral component of membrane; GO:0005506,iron ion binding; GO:0031418,L-ascorbic acid binding; GO:0004656,procollagen-proline 4-dioxygenase activity	PF13640.6:2OG-Fe(II) oxygenase superfamily
Glyma.01G191900	10	Chr01	52637976	52641839	K08762 diazepam-binding inhibitor (GABA receptor modulator, acyl-CoA-binding protein) | (RefSeq) ACBP-domain-containing protein (A)	--	PREDICTED: acyl-CoA-binding domain-containing protein 3-like [Glycine max]	RecName: Full=Acyl-CoA-binding domain-containing protein 3; Short=Acyl-CoA binding protein 3; Flags: Precursor;	SubName: Full=Uncharacterized protein {ECO:0000313|EMBL:KRH77088.1, ECO:0000313|EnsemblPlants:GLYMA01G39920.1};	Acyl-CoA-binding protein	GO:0005615,extracellular space; GO:0000062,fatty-acyl-CoA binding; GO:0008289,lipid binding	PF00887.19:Acyl CoA binding protein
Glyma.01G192100	9	Chr01	52646416	52652200	K03097 casein kinase II subunit alpha [EC:2.7.11.1] | (RefSeq) casein kinase II subunit alpha-2-like (A)	ko03008: Ribosome biogenesis in eukaryotes; ko04712: Circadian rhythm - plant	PREDICTED: casein kinase II subunit alpha-2-like [Glycine max]	RecName: Full=Casein kinase II subunit alpha-1; Short=CK II; EC=2.7.11.1 {ECO:0000269|PubMed:7696877}; AltName: Full=Casein kinase alpha 1; Short=AtCKA1 {ECO:0000303|PubMed:7678767}; Flags: Precursor;	SubName: Full=Uncharacterized protein {ECO:0000313|EMBL:KRH77093.1, ECO:0000313|EnsemblPlants:GLYMA01G39950.1};	Casein kinase II, alpha subunit	GO:0005730,nucleolus; GO:0005634,nucleus; GO:0005956,protein kinase CK2 complex; GO:0005524,ATP binding; GO:0016301,kinase activity; GO:0004674,protein serine/threonine kinase activity; GO:0042752,regulation of circadian rhythm	PF00069.25:Protein kinase domain
Glyma.01G192200	10	Chr01	52655988	52660890	--	--	PREDICTED: uncharacterized protein LOC100814070 isoform X1 [Glycine max]	RecName: Full=Ribonuclease III domain-containing protein RNC1, chloroplastic {ECO:0000305}; AltName: Full=Chloroplast ribonuclease III domain protein {ECO:0000305}; Flags: Precursor;	SubName: Full=Uncharacterized protein {ECO:0000313|EMBL:KRH77094.1, ECO:0000313|EnsemblPlants:GLYMA01G39960.1};	--	GO:0009507,chloroplast; GO:0030529,NA; GO:0005634,nucleus; GO:0003725,double-stranded RNA binding; GO:0004525,ribonuclease III activity; GO:0006397,mRNA processing; GO:0031054,pre-miRNA processing; GO:0031053,primary miRNA processing; GO:0030422,production of siRNA involved in RNA interference; GO:0090502,RNA phosphodiester bond hydrolysis, endonucleolytic; GO:0008380,RNA splicing	PF14622.6:Ribonuclease-III-like
Glyma.01G192300	10	Chr01	52666067	52670095	K03063 26S proteasome regulatory subunit T3 | (RefSeq) 26S protease regulatory subunit 6B homolog (A)	ko03050: Proteasome	PREDICTED: BTB/POZ domain-containing protein At5g67385-like [Glycine max]	RecName: Full=BTB/POZ domain-containing protein SR1IP1 {ECO:0000305}; AltName: Full=Protein ATSR1-INTERACTION PROTEIN 1 {ECO:0000303|PubMed:24528504};	SubName: Full=Uncharacterized protein {ECO:0000313|EMBL:KRH77099.1, ECO:0000313|EnsemblPlants:GLYMA01G39970.1};	--	GO:0042742,defense response to bacterium; GO:0016567,protein ubiquitination	PF03000.14:NPH3 family
Glyma.01G192400	2	Chr01	52671618	52672693	--	--	PREDICTED: uncharacterized protein LOC100815123 [Glycine max]	--	SubName: Full=Uncharacterized protein {ECO:0000313|EMBL:KRH77101.1, ECO:0000313|EnsemblPlants:GLYMA01G39981.2};	--	--	--
Glyma.01G192500	2	Chr01	52682477	52684939	K00430 peroxidase [EC:1.11.1.7] | (RefSeq) peroxidase 51-like (A)	ko00940: Phenylpropanoid biosynthesis	PREDICTED: peroxidase 51 [Glycine max]	RecName: Full=Peroxidase 51; Short=Atperox P51; EC=1.11.1.7; AltName: Full=ATP37; Flags: Precursor;	RecName: Full=Peroxidase {ECO:0000256|RuleBase:RU362060, ECO:0000256|SAAS:SAAS00709852}; EC=1.11.1.7 {ECO:0000256|RuleBase:RU362060, ECO:0000256|SAAS:SAAS00709852};	--	GO:0005576,extracellular region; GO:0020037,heme binding; GO:0046872,metal ion binding; GO:0004601,peroxidase activity; GO:0042744,hydrogen peroxide catabolic process; GO:0006979,response to oxidative stress; GO:0009651,response to salt stress	PF00141.23:Peroxidase
Glyma.01G192600	1	Chr01	52700648	52702980	K21994 LOB domain-containing protein 18 | (RefSeq) LOB domain-containing protein 19-like (A)	--	LBD domain-containing transcription factor [Glycine max]	RecName: Full=LOB domain-containing protein 38; AltName: Full=ASYMMETRIC LEAVES 2-like protein 40; Short=AS2-like protein 40;	SubName: Full=Uncharacterized protein {ECO:0000313|EMBL:KRH77108.1, ECO:0000313|EnsemblPlants:GLYMA01G40010.1};	--	--	PF03195.14:Lateral organ boundaries (LOB) domain
Glyma.01G193100	7	Chr01	52760543	52762530	K19891 glucan endo-1,3-beta-glucosidase 1/2/3 [EC:3.2.1.39] | (RefSeq) glucan endo-1,3-beta-glucosidase 1 (A)	ko00500: Starch and sucrose metabolism	PREDICTED: glucan endo-1,3-beta-glucosidase 13 [Glycine max]	RecName: Full=Glucan endo-1,3-beta-glucosidase 13; EC=3.2.1.39; AltName: Full=(1->3)-beta-glucan endohydrolase 13; Short=(1->3)-beta-glucanase 13; AltName: Full=Beta-1,3-endoglucanase 13; Short=Beta-1,3-glucanase 13; Flags: Precursor;	SubName: Full=Uncharacterized protein {ECO:0000313|EMBL:KRH77114.1, ECO:0000313|EnsemblPlants:GLYMA01G40060.1};	--	GO:0031225,anchored component of membrane; GO:0046658,anchored component of plasma membrane; GO:0005576,extracellular region; GO:0009505,plant-type cell wall; GO:0005886,plasma membrane; GO:0042973,glucan endo-1,3-beta-D-glucosidase activity; GO:0004553,hydrolase activity, hydrolyzing O-glycosyl compounds; GO:0030247,polysaccharide binding; GO:0005975,carbohydrate metabolic process; GO:0071555,ce…	PF07983.13:X8 domain
Glyma.01G193700	2	Chr01	52826779	52830477	K15040 voltage-dependent anion channel protein 2 | (RefSeq) mitochondrial outer membrane protein porin of 34 kDa-like (A)	--	uncharacterized protein LOC100818855 [Glycine max]	RecName: Full=Mitochondrial outer membrane protein porin 2; AltName: Full=Voltage-dependent anion-selective channel protein 2; Short=AtVDAC2; Short=VDAC-2;	SubName: Full=Uncharacterized protein {ECO:0000313|EMBL:ACU18830.1, ECO:0000313|EnsemblPlants:GLYMA01G40140.1};	Porin/voltage-dependent anion-selective channel protein	GO:0005741,mitochondrial outer membrane; GO:0046930,pore complex; GO:0015288,porin activity; GO:0006811,ion transport; GO:0040008,regulation of growth	PF01459.22:Eukaryotic porin
Glyma.01G194500	6	Chr01	52870361	52872070	K07955 ADP-ribosylation factor-like protein 8 | (RefSeq) ADP-ribosylation factor-like protein 8a isoform X1 (A)	--	uncharacterized protein LOC100776101 [Glycine max]	RecName: Full=ADP-ribosylation factor-like protein 8a {ECO:0000303|PubMed:22174675}; Short=AtARL8a {ECO:0000303|PubMed:22174675}; AltName: Full=ADP-ribosylation factor-like A1C {ECO:0000303|PubMed:12644670}; Short=AtARLA1C {ECO:0000303|PubMed:12644670};	SubName: Full=Uncharacterized protein {ECO:0000313|EMBL:ACU20760.1, ECO:0000313|EnsemblPlants:GLYMA01G40210.1};	GTP-binding ADP-ribosylation factor-like protein	GO:0005737,cytoplasm; GO:0005829,cytosol; GO:0005794,Golgi apparatus; GO:0031902,late endosome membrane; GO:0005765,lysosomal membrane; GO:0005634,nucleus; GO:0005886,plasma membrane; GO:0009506,plasmodesma; GO:0005819,spindle; GO:0005774,vacuolar membrane; GO:0005773,vacuole; GO:0005525,GTP binding; GO:0007049,cell cycle; GO:0051301,cell division; GO:0007059,chromosome segregation; GO:0051607,de…	PF00025.21:ADP-ribosylation factor family
Glyma.01G194700	3	Chr01	52885141	52890749	K14682 amino-acid N-acetyltransferase [EC:2.3.1.1] | (RefSeq) probable amino-acid acetyltransferase NAGS2, chloroplastic (A)	ko00220: Arginine biosynthesis; ko01210: 2-Oxocarboxylic acid metabolism; ko01230: Biosynthesis of amino acids	PREDICTED: probable amino-acid acetyltransferase NAGS1, chloroplastic isoform X1 [Glycine max]	RecName: Full=Probable amino-acid acetyltransferase NAGS1, chloroplastic; EC=2.3.1.1; AltName: Full=N-acetylglutamate synthase 1; Flags: Precursor;	SubName: Full=Uncharacterized protein {ECO:0000313|EMBL:KRH77140.1, ECO:0000313|EnsemblPlants:GLYMA01G40230.1};	Acetylglutamate kinase/acetylglutamate synthase	GO:0009507,chloroplast; GO:0004042,acetyl-CoA:L-glutamate N-acetyltransferase activity; GO:0103045,methione N-acyltransferase activity; GO:0006526,arginine biosynthetic process	PF00696.28:Amino acid kinase family
Glyma.01G195000	6	Chr01	52920865	52924028	K08238 xyloglucan 6-xylosyltransferase [EC:2.4.2.39] | (RefSeq) probable xyloglucan 6-xylosyltransferase 5 (A)	--	PREDICTED: galactomannan galactosyltransferase 1-like [Glycine max]	RecName: Full=Galactomannan galactosyltransferase 1; EC=2.4.1.-;	SubName: Full=Uncharacterized protein {ECO:0000313|EMBL:KRH77153.1, ECO:0000313|EnsemblPlants:GLYMA01G40270.1};	Subunit of Golgi mannosyltransferase complex	GO:0000139,Golgi membrane; GO:0016021,integral component of membrane; GO:0016757,transferase activity, transferring glycosyl groups; GO:0071555,cell wall organization	PF05637.12:galactosyl transferase GMA12/MNN10 family
Glyma.02G265100	5	Chr02	45011264	45020938	K08738 cytochrome c | (RefSeq) cytochrome c (A)	--	hypothetical protein GLYMA_02G265100 [Glycine max]	RecName: Full=Nodulin-16; Short=N-16; Flags: Precursor;	SubName: Full=Uncharacterized protein {ECO:0000313|EMBL:KRH73289.1};	Cytochrome c	GO:0043661,peribacteroid membrane; GO:0009877,nodulation	PF07172.11:Glycine rich protein family
Glyma.02G267800	5	Chr02	45217023	45227434	K10143 E3 ubiquitin-protein ligase RFWD2 [EC:2.3.2.27] | (RefSeq) E3 ubiquitin-protein ligase COP1-like (A)	ko04120: Ubiquitin mediated proteolysis; ko04712: Circadian rhythm - plant	PREDICTED: E3 ubiquitin-protein ligase COP1-like [Glycine max]	RecName: Full=E3 ubiquitin-protein ligase COP1; EC=2.3.2.27 {ECO:0000250|UniProtKB:P43254}; AltName: Full=Constitutive photomorphogenesis protein 1; AltName: Full=RING-type E3 ubiquitin transferase COP1 {ECO:0000305};	SubName: Full=Uncharacterized protein {ECO:0000313|EMBL:KRH73341.1, ECO:0000313|EnsemblPlants:GLYMA02G43540.1};	--	GO:0005737,cytoplasm; GO:0005634,nucleus; GO:0046872,metal ion binding; GO:0016740,transferase activity; GO:0016567,protein ubiquitination; GO:0009585,red, far-red light phototransduction	PF00400.32:WD domain, G-beta repeat
Glyma.01G196800	10	Chr01	53106926	53109093	K08235 xyloglucan:xyloglucosyl transferase [EC:2.4.1.207] | (RefSeq) probable xyloglucan endotransglucosylase/hydrolase protein 6 (A)	--	PREDICTED: probable xyloglucan endotransglucosylase/hydrolase protein 6 [Glycine max]	RecName: Full=Probable xyloglucan endotransglucosylase/hydrolase protein 6; Short=At-XTH6; Short=XTH-6; EC=2.4.1.207; Flags: Precursor;	RecName: Full=Xyloglucan endotransglucosylase/hydrolase {ECO:0000256|RuleBase:RU361120}; EC=2.4.1.207 {ECO:0000256|RuleBase:RU361120};	--	GO:0048046,apoplast; GO:0005618,cell wall; GO:0004553,hydrolase activity, hydrolyzing O-glycosyl compounds; GO:0016762,xyloglucan:xyloglucosyl transferase activity; GO:0042546,cell wall biogenesis; GO:0071555,cell wall organization; GO:0009414,response to water deprivation; GO:0010411,xyloglucan metabolic process	PF00722.21:Glycosyl hydrolases family 16
Glyma.01G197400	3	Chr01	53139624	53142971	--	--	hypothetical protein GLYMA_01G197400 [Glycine max]	--	SubName: Full=Uncharacterized protein {ECO:0000313|EMBL:KRH77182.1};	--	--	--
Glyma.01G197500	10	Chr01	53144122	53146677	K07374 tubulin alpha | (RefSeq) tubulin alpha-2 chain-like (A)	ko04145: Phagosome	PREDICTED: tubulin alpha-2 chain-like [Glycine max]	RecName: Full=Tubulin alpha chain;	RecName: Full=Tubulin alpha chain {ECO:0000256|RuleBase:RU000352};	Alpha tubulin	GO:0005737,cytoplasm; GO:0005874,microtubule; GO:0005525,GTP binding; GO:0003924,GTPase activity; GO:0005200,structural constituent of cytoskeleton; GO:0007017,microtubule-based process	PF00091.25:Tubulin/FtsZ family, GTPase domain
Glyma.01G198000	8	Chr01	53200980	53202684	K13422 transcription factor MYC2 | (RefSeq) transcription factor MYC2-like (A)	ko04016: MAPK signaling pathway - plant; ko04075: Plant hormone signal transduction	PREDICTED: transcription factor bHLH18-like [Glycine max]	RecName: Full=Transcription factor bHLH25; AltName: Full=Basic helix-loop-helix protein 25; Short=AtbHLH25; Short=bHLH 25; AltName: Full=Transcription factor EN 29; AltName: Full=bHLH transcription factor bHLH025;	SubName: Full=Uncharacterized protein {ECO:0000313|EMBL:KRH77193.1, ECO:0000313|EnsemblPlants:GLYMA01G40611.1};	--	GO:0005634,nucleus; GO:0003677,DNA binding; GO:0003700,DNA-binding transcription factor activity; GO:0046983,protein dimerization activity; GO:0006355,regulation of transcription, DNA-templated; GO:0006351,transcription, DNA-templated	PF00010.26:Helix-loop-helix DNA-binding domain
Glyma.01G198100	8	Chr01	53209161	53212088	K13422 transcription factor MYC2 | (RefSeq) transcription factor MYC2-like (A)	ko04016: MAPK signaling pathway - plant; ko04075: Plant hormone signal transduction	PREDICTED: transcription factor bHLH18-like isoform X1 [Glycine max]	RecName: Full=Transcription factor bHLH25; AltName: Full=Basic helix-loop-helix protein 25; Short=AtbHLH25; Short=bHLH 25; AltName: Full=Transcription factor EN 29; AltName: Full=bHLH transcription factor bHLH025;	SubName: Full=Uncharacterized protein {ECO:0000313|EMBL:KRH77195.1, ECO:0000313|EnsemblPlants:GLYMA01G40620.2};	--	GO:0005634,nucleus; GO:0003677,DNA binding; GO:0003700,DNA-binding transcription factor activity; GO:0046983,protein dimerization activity; GO:0006355,regulation of transcription, DNA-templated; GO:0006351,transcription, DNA-templated	PF00010.26:Helix-loop-helix DNA-binding domain
Glyma.01G198700	12	Chr01	53251004	53252299	K08081 tropinone reductase I [EC:1.1.1.206] | (RefSeq) tropinone reductase homolog At5g06060-like (A)	ko00960: Tropane, piperidine and pyridine alkaloid biosynthesis	PREDICTED: transcriptional regulator SUPERMAN-like [Glycine max]	RecName: Full=Zinc finger protein 10 {ECO:0000305}; Short=AtZFP10 {ECO:0000303|PubMed:12154136};	SubName: Full=Uncharacterized protein {ECO:0000313|EMBL:KRH77204.1, ECO:0000313|EnsemblPlants:GLYMA01G40671.1};	--	GO:0005634,nucleus; GO:0003700,DNA-binding transcription factor activity; GO:0046872,metal ion binding; GO:0003676,nucleic acid binding; GO:0007275,multicellular organism development; GO:0040008,regulation of growth; GO:0006355,regulation of transcription, DNA-templated; GO:0006351,transcription, DNA-templated	PF13912.6:C2H2-type zinc finger
Glyma.01G199600	12	Chr01	53330656	53336012	K01102 pyruvate dehydrogenase phosphatase [EC:3.1.3.43] | (RefSeq) putative protein phosphatase 2C 46 (A)	--	PREDICTED: protein phosphatase 2C 29-like [Glycine max]	RecName: Full=Protein phosphatase 2C 29; Short=AtPP2C29; EC=3.1.3.16; AltName: Full=Protein POLTERGEIST-LIKE 1; AltName: Full=Protein phosphatase 2C PLL1; Short=PP2C PLL1;	SubName: Full=Uncharacterized protein {ECO:0000313|EMBL:KRH77217.1, ECO:0000313|EnsemblPlants:GLYMA01G40780.1};	Protein phosphatase 2C/pyruvate dehydrogenase (lipoamide) phosphatase	GO:0005634,nucleus; GO:0005886,plasma membrane; GO:0046872,metal ion binding; GO:0005543,phospholipid binding; GO:0004722,protein serine/threonine phosphatase activity; GO:0010074,maintenance of meristem identity; GO:0009933,meristem structural organization; GO:0007275,multicellular organism development; GO:0006355,regulation of transcription, DNA-templated; GO:0009826,unidimensional cell growth	PF00481.21:Protein phosphatase 2C
Glyma.01G199700	10	Chr01	53347895	53349718	K02437 glycine cleavage system H protein | (RefSeq) uncharacterized LOC100306654 (A)	ko00260: Glycine, serine and threonine metabolism; ko00630: Glyoxylate and dicarboxylate metabolism; ko01200: Carbon metabolism	uncharacterized protein LOC100306654 [Glycine max]	RecName: Full=Glycine cleavage system H protein, mitochondrial; Flags: Precursor;	RecName: Full=Glycine cleavage system H protein {ECO:0000256|RuleBase:RU364055};	Glycine cleavage system H protein (lipoate-binding)	GO:0005960,glycine cleavage complex; GO:0005739,mitochondrion; GO:0019464,glycine decarboxylation via glycine cleavage system	PF01597.19:Glycine cleavage H-protein
Glyma.01G200000	8	Chr01	53360767	53364421	K02183 calmodulin | (RefSeq) Calmodulin (A)	ko04016: MAPK signaling pathway - plant; ko04070: Phosphatidylinositol signaling system; ko04626: Plant-pathogen interaction	PREDICTED: uncharacterized protein At5g64816 [Glycine max]	RecName: Full=Uncharacterized protein At5g64816; Flags: Precursor;	SubName: Full=Uncharacterized protein {ECO:0000313|EMBL:KRH77223.1, ECO:0000313|EnsemblPlants:GLYMA01G40840.1};	--	--	--
Glyma.02G273800	5	Chr02	45708202	45712024	K10960 geranylgeranyl diphosphate/geranylgeranyl-bacteriochlorophyllide a reductase [EC:1.3.1.83 1.3.1.111] | (RefSeq) geranylgeranyl diphosphate reductase, chloroplastic-like (A)	ko00860: Porphyrin and chlorophyll metabolism; ko00900: Terpenoid backbone biosynthesis	PREDICTED: geranylgeranyl diphosphate reductase, chloroplastic-like [Glycine max]	RecName: Full=Geranylgeranyl diphosphate reductase, chloroplastic; EC=1.3.1.83; AltName: Full=Geranylgeranyl reductase; Flags: Precursor;	SubName: Full=Uncharacterized protein {ECO:0000313|EMBL:KRH73442.1, ECO:0000313|EnsemblPlants:GLYMA02G44145.1};	--	GO:0009507,chloroplast; GO:0071949,FAD binding; GO:0102067,geranylgeranyl diphosphate reductase activity; GO:0045550,geranylgeranyl reductase activity; GO:0015995,chlorophyll biosynthetic process; GO:0033385,geranylgeranyl diphosphate metabolic process; GO:0015979,photosynthesis; GO:0033521,phytyl diphosphate biosynthetic process; GO:0010189,vitamin E biosynthetic process	PF01494.19:FAD binding domain
Glyma.01G200200	9	Chr01	53391283	53397698	K00873 pyruvate kinase [EC:2.7.1.40] | (RefSeq) pyruvate kinase isozyme G, chloroplastic (A)	ko00010: Glycolysis / Gluconeogenesis; ko00230: Purine metabolism; ko00620: Pyruvate metabolism; ko01200: Carbon metabolism; ko01230: Biosynthesis of amino acids	PREDICTED: pyruvate kinase isozyme G, chloroplastic isoform X2 [Glycine max]	RecName: Full=Pyruvate kinase isozyme G, chloroplastic; EC=2.7.1.40; Flags: Precursor;	RecName: Full=Pyruvate kinase {ECO:0000256|RuleBase:RU000504}; EC=2.7.1.40 {ECO:0000256|RuleBase:RU000504};	Pyruvate kinase	GO:0009507,chloroplast; GO:0005524,ATP binding; GO:0016301,kinase activity; GO:0000287,magnesium ion binding; GO:0030955,potassium ion binding; GO:0004743,pyruvate kinase activity	PF00224.21:Pyruvate kinase, barrel domain
Glyma.01G201000	6	Chr01	53464003	53466373	K02867 large subunit ribosomal protein L11 | (RefSeq) 50S ribosomal protein L11, chloroplastic-like (A)	ko03010: Ribosome	50S ribosomal protein L11, chloroplastic [Glycine soja]	RecName: Full=50S ribosomal protein L11, chloroplastic; AltName: Full=CL11; Flags: Precursor;	SubName: Full=Uncharacterized protein {ECO:0000313|EMBL:KRH77240.1, ECO:0000313|EnsemblPlants:GLYMA01G40920.1};	Mitochondrial/chloroplast ribosomal protein L11	GO:0009507,chloroplast; GO:0009941,chloroplast envelope; GO:0009570,chloroplast stroma; GO:0022625,cytosolic large ribosomal subunit; GO:0022626,cytosolic ribosome; GO:0016020,membrane; GO:0019843,rRNA binding; GO:0003735,structural constituent of ribosome; GO:0000027,ribosomal large subunit assembly; GO:0006412,translation	PF03946.14:Ribosomal protein L11, N-terminal domain
Glyma.01G202000	6	Chr01	53495131	53496738	K20884 riboflavin kinase / FMN hydrolase [EC:2.7.1.26 3.1.3.102] | (RefSeq) bifunctional riboflavin kinase/FMN phosphatase-like isoform X1 (A)	ko00740: Riboflavin metabolism	uncharacterized protein LOC100793483 [Glycine max]	RecName: Full=Haloacid dehalogenase-like hydrolase domain-containing protein Sgpp; EC=3.1.3.-; AltName: Full=Subclass I phosphosugar phosphatase; Short=AtSgpp;	SubName: Full=Uncharacterized protein {ECO:0000313|EMBL:ACU17885.1, ECO:0000313|EnsemblPlants:GLYMA01G41030.1};	Predicted haloacid-halidohydrolase and related hydrolases	GO:0005829,cytosol; GO:0005886,plasma membrane; GO:0046872,metal ion binding; GO:0050308,sugar-phosphatase activity	PF13419.6:Haloacid dehalogenase-like hydrolase
Glyma.01G202500	1	Chr01	53518781	53522418	K07893 Ras-related protein Rab-6A | (RefSeq) ras-related protein RABH1b-like (A)	--	PREDICTED: ras-related protein RABH1b-like [Glycine max]	RecName: Full=Ras-related protein RABH1b; Short=AtRABH1b; AltName: Full=Ras-related protein Rab6A; Short=AtRab6A;	SubName: Full=Uncharacterized protein {ECO:0000313|EMBL:KRH77258.1, ECO:0000313|EnsemblPlants:GLYMA01G41100.1};	GTPase Rab6/YPT6/Ryh1, small G protein superfamily	GO:0005829,cytosol; GO:0005768,endosome; GO:0005794,Golgi apparatus; GO:0000139,Golgi membrane; GO:0016020,membrane; GO:0005886,plasma membrane; GO:0009506,plasmodesma; GO:0005802,trans-Golgi network; GO:0005774,vacuolar membrane; GO:0005525,GTP binding; GO:0003924,GTPase activity; GO:0006891,intra-Golgi vesicle-mediated transport; GO:0015031,protein transport; GO:0042147,retrograde transport, en…	PF00071.22:Ras family
Glyma.02G279700	5	Chr02	46197589	46198152	--	--	hypothetical protein GLYMA_02G279700 [Glycine max]	--	SubName: Full=Uncharacterized protein {ECO:0000313|EnsemblPlants:GLYMA02G44821.1};	--	--	--
Glyma.01G203200	6	Chr01	53607515	53609496	--	--	PREDICTED: uncharacterized protein LOC100797178 [Glycine max]	--	SubName: Full=Uncharacterized protein {ECO:0000313|EMBL:KRH77270.1, ECO:0000313|EnsemblPlants:GLYMA01G41170.1};	--	--	PF04570.14:zinc-finger of the FCS-type, C2-C2
Glyma.01G203600	8	Chr01	53675799	53677511	K02921 large subunit ribosomal protein L37Ae | (RefSeq) 60S ribosomal protein L37a (A)	ko03010: Ribosome	uncharacterized protein LOC100499850 [Glycine max]	RecName: Full=60S ribosomal protein L37a;	SubName: Full=Uncharacterized protein {ECO:0000313|EMBL:AFK37622.1};	60S ribosomal protein L37	GO:0005840,ribosome; GO:0046872,metal ion binding; GO:0003735,structural constituent of ribosome; GO:0006412,translation	PF01780.19:Ribosomal L37ae protein family
Glyma.01G204200	10	Chr01	53707027	53710946	K14498 serine/threonine-protein kinase SRK2 [EC:2.7.11.1] | (RefSeq) serine/threonine-protein kinase SAPK3-like (A)	ko04016: MAPK signaling pathway - plant; ko04075: Plant hormone signal transduction	protein kinase [Glycine max]	RecName: Full=Serine/threonine-protein kinase SRK2A {ECO:0000303|PubMed:27268428}; EC=2.7.11.1 {ECO:0000269|PubMed:27268428}; AltName: Full=SNF1-related kinase 2A {ECO:0000305}; Short=PpSnRK2A {ECO:0000303|PubMed:27268428};	SubName: Full=Uncharacterized protein {ECO:0000313|EMBL:KRH77284.1, ECO:0000313|EnsemblPlants:GLYMA01G41260.1};	Serine/threonine protein kinase	GO:0005737,cytoplasm; GO:0005634,nucleus; GO:0005524,ATP binding; GO:0004674,protein serine/threonine kinase activity; GO:0035556,intracellular signal transduction; GO:0006468,protein phosphorylation	PF00069.25:Protein kinase domain
Glyma.01G204400	2	Chr01	53722328	53724096	K13464 jasmonate ZIM domain-containing protein | (RefSeq) protein TIFY 10B (A)	ko04075: Plant hormone signal transduction	PREDICTED: protein TIFY 10B [Glycine max]	RecName: Full=Protein TIFY 10a {ECO:0000305}; Short=OsTIFY10a {ECO:0000303|PubMed:19618278}; AltName: Full=Jasmonate ZIM domain-containing protein 6 {ECO:0000305}; Short=OsJAZ6 {ECO:0000303|PubMed:19618278}; AltName: Full=OsJAZ5 {ECO:0000303|PubMed:23320078};	SubName: Full=ZIM transcription factor {ECO:0000313|EMBL:ALA09267.1};	--	GO:0005634,nucleus; GO:0003714,transcription corepressor activity; GO:1903507,negative regulation of nucleic acid-templated transcription; GO:0031347,regulation of defense response; GO:2000022,regulation of jasmonic acid mediated signaling pathway; GO:0006355,regulation of transcription, DNA-templated; GO:0009611,response to wounding; GO:0006351,transcription, DNA-templated	PF06200.14:tify domain
Glyma.01G204600	3	Chr01	53736138	53739927	K00261 glutamate dehydrogenase (NAD(P)+) [EC:1.4.1.3] | (RefSeq) glutamate dehydrogenase 2 (A)	ko00220: Arginine biosynthesis; ko00250: Alanine, aspartate and glutamate metabolism; ko00910: Nitrogen metabolism; ko01200: Carbon metabolism	PREDICTED: glutamate dehydrogenase 2 [Glycine max]	RecName: Full=Glutamate dehydrogenase 2; Short=GDH 2; EC=1.4.1.3;	RecName: Full=Glutamate dehydrogenase {ECO:0000256|PIRNR:PIRNR000185};	Glutamate/leucine/phenylalanine/valine dehydrogenases	GO:0005739,mitochondrion; GO:0005774,vacuolar membrane; GO:0005524,ATP binding; GO:0050897,cobalt ion binding; GO:0005507,copper ion binding; GO:0004352,glutamate dehydrogenase (NAD+) activity; GO:0004353,glutamate dehydrogenase [NAD(P)+] activity; GO:0008270,zinc ion binding; GO:0006520,cellular amino acid metabolic process; GO:0046686,response to cadmium ion; GO:0009651,response to salt stress	PF00208.21:Glutamate/Leucine/Phenylalanine/Valine dehydrogenase
Glyma.01G204700	3	Chr01	53740048	53741473	--	--	chlorophyll A-B binding family protein [Glycine max]	RecName: Full=Light-harvesting complex-like protein 3 isotype 1, chloroplastic {ECO:0000305}; AltName: Full=LHC-like protein 3 isoform 1 {ECO:0000305}; Flags: Precursor;	SubName: Full=Uncharacterized protein {ECO:0000313|EMBL:KRH77295.1, ECO:0000313|EnsemblPlants:GLYMA01G41320.1};	--	GO:0009507,chloroplast; GO:0009535,chloroplast thylakoid membrane; GO:0016021,integral component of membrane; GO:0009523,photosystem II; GO:0042651,thylakoid membrane; GO:0016168,chlorophyll binding; GO:0003700,DNA-binding transcription factor activity; GO:0019899,enzyme binding; GO:0042802,identical protein binding; GO:0043495,protein membrane anchor; GO:0015979,photosynthesis; GO:1902326,positi…	PF00504.21:Chlorophyll A-B binding protein
Glyma.01G205100	3	Chr01	53760813	53765463	K09184 GATA-binding protein, other eukaryote | (RefSeq) ras-associated and pleckstrin homology domains-containing protein 1 isoform X1 (A)	--	PREDICTED: GATA transcription factor 26-like [Glycine max]	RecName: Full=GATA transcription factor 26;	SubName: Full=Uncharacterized protein {ECO:0000313|EMBL:KRH77299.1, ECO:0000313|EnsemblPlants:GLYMA01G41370.1};	GATA-4/5/6 transcription factors	GO:0005634,nucleus; GO:0005667,transcription factor complex; GO:0003682,chromatin binding; GO:0000977,RNA polymerase II regulatory region sequence-specific DNA binding; GO:0001085,RNA polymerase II transcription factor binding; GO:0001228,DNA-binding transcription activator activity, RNA polymerase II-specific; GO:0008270,zinc ion binding; GO:0030154,cell differentiation	PF00320.27:GATA zinc finger
Glyma.01G205300	8	Chr01	53783537	53787601	K20222 importin-5 | (RefSeq) importin-5-like isoform X1 (A)	--	PREDICTED: uncharacterized protein LOC100305949 isoform X1 [Glycine max]	RecName: Full=Vesicle-associated protein 2-1; AltName: Full=Plant VAP homolog 21; Short=AtPVA21; AltName: Full=VAMP-associated protein 2-1; Contains: RecName: Full=Vesicle-associated protein 2-1, N-terminally processed;	SubName: Full=Uncharacterized protein {ECO:0000313|EMBL:KRH77304.1, ECO:0000313|EnsemblPlants:GLYMA01G41390.2};	VAMP-associated protein involved in inositol metabolism	GO:0005783,endoplasmic reticulum; GO:0005789,endoplasmic reticulum membrane; GO:0016021,integral component of membrane; GO:0005886,plasma membrane	PF00635.26:MSP (Major sperm protein) domain
Glyma.01G205500	10	Chr01	53801437	53803924	--	--	PREDICTED: uncharacterized protein LOC100804977 [Glycine max]	--	SubName: Full=Uncharacterized protein {ECO:0000313|EMBL:KRH77307.1, ECO:0000313|EnsemblPlants:GLYMA01G41411.1};	--	--	PF05769.11:SIKE family
Glyma.01G206100	7	Chr01	53856088	53858736	K05607 methylglutaconyl-CoA hydratase [EC:4.2.1.18] | (RefSeq) hypothetical protein (A)	ko00280: Valine, leucine and isoleucine degradation	PREDICTED: uncharacterized protein LOC102668205 [Glycine max]	--	SubName: Full=Uncharacterized protein {ECO:0000313|EMBL:KRH77318.1, ECO:0000313|EnsemblPlants:GLYMA01G41471.1};	--	--	--
Glyma.01G206200	8	Chr01	53858950	53862351	K05609 ubiquitin carboxyl-terminal hydrolase L3 [EC:3.4.19.12] | (RefSeq) ubiquitin carboxyl-terminal hydrolase 3-like (A)	--	hypothetical protein GLYMA_01G206200 [Glycine max]	RecName: Full=Ubiquitin carboxyl-terminal hydrolase 3 {ECO:0000303|PubMed:17559514}; EC=3.4.19.12 {ECO:0000305};	RecName: Full=Ubiquitin carboxyl-terminal hydrolase {ECO:0000256|RuleBase:RU361215}; EC=3.4.19.12 {ECO:0000256|RuleBase:RU361215};	Ubiquitin C-terminal hydrolase UCHL1	GO:0005829,cytosol; GO:0004843,thiol-dependent ubiquitin-specific protease activity; GO:0016579,protein deubiquitination; GO:0006511,ubiquitin-dependent protein catabolic process	PF01088.21:Ubiquitin carboxyl-terminal hydrolase, family 1
Glyma.01G206500	9	Chr01	53866538	53869493	K13416 brassinosteroid insensitive 1-associated receptor kinase 1 [EC:2.7.10.1 2.7.11.1] | (RefSeq) hypothetical protein (A)	ko04016: MAPK signaling pathway - plant; ko04075: Plant hormone signal transduction; ko04626: Plant-pathogen interaction	PREDICTED: G-type lectin S-receptor-like serine/threonine-protein kinase RLK1 [Glycine max]	RecName: Full=G-type lectin S-receptor-like serine/threonine-protein kinase LECRK3 {ECO:0000305}; Short=OsLecRK3 {ECO:0000303|PubMed:25485617}; EC=2.7.11.1 {ECO:0000305}; AltName: Full=OsRLCK135 {ECO:0000305}; Flags: Precursor;	SubName: Full=Uncharacterized protein {ECO:0000313|EMBL:KRH77321.1, ECO:0000313|EnsemblPlants:GLYMA01G41500.1};	--	GO:0016021,integral component of membrane; GO:0005524,ATP binding; GO:0030246,carbohydrate binding; GO:0004674,protein serine/threonine kinase activity; GO:0006952,defense response	PF00069.25:Protein kinase domain
Glyma.01G207200	9	Chr01	53913014	53919003	K01074 palmitoyl-protein thioesterase [EC:3.1.2.22] | (RefSeq) palmitoyl-protein thioesterase 1-like (A)	ko00062: Fatty acid elongation; ko01212: Fatty acid metabolism	PREDICTED: palmitoyl-protein thioesterase 1-like isoform X2 [Glycine max]	--	SubName: Full=Uncharacterized protein {ECO:0000313|EMBL:KRH77330.1, ECO:0000313|EnsemblPlants:GLYMA01G41571.1};	Palmitoyl protein thioesterase	GO:0043231,intracellular membrane-bounded organelle; GO:0098599,palmitoyl hydrolase activity; GO:0016790,thiolester hydrolase activity	PF02089.15:Palmitoyl protein thioesterase
Glyma.02G283400	5	Chr02	46520816	46523824	K02291 15-cis-phytoene synthase [EC:2.5.1.32] | (RefSeq) phytoene synthase 2, chloroplastic-like (A)	ko00906: Carotenoid biosynthesis	PREDICTED: phytoene synthase 2, chloroplastic-like [Glycine max]	RecName: Full=Phytoene synthase, chloroplastic; EC=2.5.1.32; Flags: Precursor;	SubName: Full=Uncharacterized protein {ECO:0000313|EMBL:KRH73607.1, ECO:0000313|EnsemblPlants:GLYMA02G45270.1};	Squalene synthetase	GO:0009507,chloroplast; GO:0004310,farnesyl-diphosphate farnesyltransferase activity; GO:0016767,geranylgeranyl-diphosphate geranylgeranyltransferase activity; GO:0051996,squalene synthase activity; GO:0016117,carotenoid biosynthetic process; GO:0006696,ergosterol biosynthetic process	PF00494.19:Squalene/phytoene synthase
Glyma.01G208200	10	Chr01	53995308	53998115	K09873 aquaporin TIP | (RefSeq) probable aquaporin TIP-type RB7-5A (A)	--	PREDICTED: probable aquaporin TIP-type RB7-5A [Glycine max]	RecName: Full=Probable aquaporin TIP-type RB7-5A; AltName: Full=RT-TIP; AltName: Full=TobRB7; AltName: Full=Tonoplast intrinsic protein, root-specific RB7-5A;	SubName: Full=Uncharacterized protein {ECO:0000313|EMBL:KRH77347.1, ECO:0000313|EnsemblPlants:GLYMA01G41670.1};	Aquaporin (major intrinsic protein family)	GO:0016021,integral component of membrane; GO:0005774,vacuolar membrane; GO:0015267,channel activity	PF00230.20:Major intrinsic protein
Glyma.01G209500	7	Chr01	54105335	54109214	K01051 pectinesterase [EC:3.1.1.11] | (RefSeq) probable pectinesterase 53 (A)	ko00040: Pentose and glucuronate interconversions	PREDICTED: probable pectinesterase 68 [Glycine max]	RecName: Full=Probable pectinesterase 68; Short=PE 68; EC=3.1.1.11; AltName: Full=Pectin methylesterase 68; Short=AtPME68; Flags: Precursor;	RecName: Full=Pectinesterase {ECO:0000256|RuleBase:RU000589}; EC=3.1.1.11 {ECO:0000256|RuleBase:RU000589};	--	GO:0005618,cell wall; GO:0005576,extracellular region; GO:0045330,aspartyl esterase activity; GO:0030599,pectinesterase activity; GO:0042545,cell wall modification; GO:0045490,pectin catabolic process	PF01095.19:Pectinesterase
Glyma.01G209700	6	Chr01	54126055	54127290	--	--	hypothetical protein glysoja_018943 [Glycine soja]	--	SubName: Full=Uncharacterized protein {ECO:0000313|EMBL:KRH77366.1, ECO:0000313|EnsemblPlants:GLYMA01G41840.1};	--	GO:0016021,integral component of membrane	--
Glyma.01G210100	3	Chr01	54149732	54153198	K20222 importin-5 | (RefSeq) importin-5-like isoform X1 (A)	--	PREDICTED: vesicle-associated protein 1-2-like [Glycine max]	RecName: Full=Vesicle-associated protein 1-2; AltName: Full=Plant VAP homolog 12; Short=AtPVA12; AltName: Full=VAMP-associated protein 1-2; Contains: RecName: Full=Vesicle-associated protein 1-2, N-terminally processed;	SubName: Full=Uncharacterized protein {ECO:0000313|EMBL:KRH77373.1, ECO:0000313|EnsemblPlants:GLYMA01G41901.1};	VAMP-associated protein involved in inositol metabolism	GO:0005829,cytosol; GO:0005783,endoplasmic reticulum; GO:0005789,endoplasmic reticulum membrane; GO:0016021,integral component of membrane; GO:0005634,nucleus; GO:0005886,plasma membrane; GO:0006605,protein targeting	PF00635.26:MSP (Major sperm protein) domain
Glyma.01G210600	6	Chr01	54190043	54197558	K20456 oxysterol-binding protein 1 | (RefSeq) oxysterol-binding protein-related protein 2A-like (A)	--	PREDICTED: oxysterol-binding protein-related protein 2A-like isoform X3 [Glycine max]	RecName: Full=Oxysterol-binding protein-related protein 2A; AltName: Full=OSBP-related protein 2A;	SubName: Full=Uncharacterized protein {ECO:0000313|EMBL:KRH77382.1, ECO:0000313|EnsemblPlants:GLYMA01G41940.2};	Oxysterol-binding protein	GO:0008289,lipid binding; GO:0006869,lipid transport	PF01237.18:Oxysterol-binding protein
Glyma.01G210700	8	Chr01	54226527	54227655	--	--	PREDICTED: uncharacterized protein LOC100820460 [Glycine max]	--	SubName: Full=Uncharacterized protein {ECO:0000313|EMBL:KRH77393.1, ECO:0000313|EnsemblPlants:GLYMA01G41960.1};	--	--	--
Glyma.01G211000	2	Chr01	54261857	54266740	K01193 beta-fructofuranosidase [EC:3.2.1.26] | (RefSeq) acid beta-fructofuranosidase-like (A)	ko00052: Galactose metabolism; ko00500: Starch and sucrose metabolism	PREDICTED: acid beta-fructofuranosidase-like [Glycine max]	RecName: Full=Acid beta-fructofuranosidase {ECO:0000303|Ref.1}; EC=3.2.1.26 {ECO:0000255|PROSITE-ProRule:PRU10067}; AltName: Full=Acid invertase {ECO:0000303|Ref.1}; Short=AI {ECO:0000303|Ref.1}; AltName: Full=Acid sucrose hydrolase; AltName: Full=Vacuolar invertase; Contains: RecName: Full=Acid beta-fructofuranosidase 30 kDa subunit {ECO:0000303|Ref.1}; Contains: RecName: Full=Acid beta-fructofu…	SubName: Full=Uncharacterized protein {ECO:0000313|EMBL:KRH77397.1, ECO:0000313|EnsemblPlants:GLYMA01G41990.1};	Beta-fructofuranosidase (invertase)	GO:0016021,integral component of membrane; GO:0005775,vacuolar lumen; GO:0004575,sucrose alpha-glucosidase activity; GO:0005985,sucrose metabolic process	PF00251.20:Glycosyl hydrolases family 32 N-terminal domain
Glyma.01G211300	6	Chr01	54280936	54282024	K01051 pectinesterase [EC:3.1.1.11] | (RefSeq) PME3; pectin methylesterase 3 (A)	ko00040: Pentose and glucuronate interconversions	PREDICTED: 21 kDa protein [Glycine max]	RecName: Full=Pectinesterase inhibitor 9 {ECO:0000305}; AltName: Full=Pectin methylesterase inhibitor 9 {ECO:0000303|PubMed:28034952}; Short=AtPMEI9 {ECO:0000303|PubMed:28034952}; Flags: Precursor;	SubName: Full=Uncharacterized protein {ECO:0000313|EMBL:KRH77402.1, ECO:0000313|EnsemblPlants:GLYMA01G42025.1};	--	GO:0048046,apoplast; GO:0004857,enzyme inhibitor activity; GO:0046910,pectinesterase inhibitor activity	PF04043.15:Plant invertase/pectin methylesterase inhibitor
Glyma.01G211900	10	Chr01	54348642	54352377	K13416 brassinosteroid insensitive 1-associated receptor kinase 1 [EC:2.7.10.1 2.7.11.1] | (RefSeq) BRASSINOSTEROID INSENSITIVE 1-associated receptor kinase 1-like isoform X1 (A)	ko04016: MAPK signaling pathway - plant; ko04075: Plant hormone signal transduction; ko04626: Plant-pathogen interaction	PREDICTED: probable LRR receptor-like serine/threonine-protein kinase At4g30520 isoform X1 [Glycine max]	RecName: Full=Protein NSP-INTERACTING KINASE 2; EC=2.7.11.1; AltName: Full=LRR receptor-like serine/threonine-protein kinase NIK2; Flags: Precursor;	SubName: Full=Uncharacterized protein {ECO:0000313|EMBL:KRH77409.1, ECO:0000313|EnsemblPlants:GLYMA01G42100.1};	--	GO:0016021,integral component of membrane; GO:0005886,plasma membrane; GO:0005524,ATP binding; GO:0004675,transmembrane receptor protein serine/threonine kinase activity; GO:0007166,cell surface receptor signaling pathway; GO:0006952,defense response; GO:0006468,protein phosphorylation; GO:0016032,viral process	PF07714.17:Protein tyrosine kinase
Glyma.02G300400	5	Chr02	47678743	47679849	--	--	PREDICTED: extensin-3-like [Glycine max]	--	SubName: Full=Uncharacterized protein {ECO:0000313|EMBL:KHN43898.1};	--	GO:0016021,integral component of membrane	--
Glyma.01G212400	2	Chr01	54388606	54391894	--	--	PREDICTED: uncharacterized protein LOC100802491 [Glycine max]	--	SubName: Full=Uncharacterized protein {ECO:0000313|EMBL:KRH77421.1, ECO:0000313|EnsemblPlants:GLYMA01G42160.1};	--	--	PF04937.15:Protein of unknown function (DUF 659)
Glyma.01G212800	2	Chr01	54409341	54412754	--	--	PREDICTED: ACT domain-containing protein ACR8-like [Glycine max]	RecName: Full=ACT domain-containing protein ACR8 {ECO:0000305}; AltName: Full=Protein ACT DOMAIN REPEATS 8 {ECO:0000303|PubMed:12481063};	SubName: Full=Uncharacterized protein {ECO:0000313|EMBL:KRH77426.1, ECO:0000313|EnsemblPlants:GLYMA01G42200.1};	--	GO:0016597,amino acid binding; GO:0009737,response to abscisic acid	PF01842.25:ACT domain
Glyma.01G213400	6	Chr01	54471171	54474546	K03453 bile acid:Na+ symporter, BASS family | (RefSeq) probable sodium/metabolite cotransporter BASS3, chloroplastic (A)	--	PREDICTED: probable sodium/metabolite cotransporter BASS5, chloroplastic [Glycine max]	RecName: Full=Probable sodium/metabolite cotransporter BASS5, chloroplastic; AltName: Full=Bile acid-sodium symporter family protein 5; Flags: Precursor;	SubName: Full=Uncharacterized protein {ECO:0000313|EMBL:KRH77437.1, ECO:0000313|EnsemblPlants:GLYMA01G42260.1};	Na+-bile acid cotransporter	GO:0009941,chloroplast envelope; GO:0016021,integral component of membrane	PF01758.16:Sodium Bile acid symporter family
Glyma.01G213800	7	Chr01	54496364	54502464	K16812 targeting protein for Xklp2 | (RefSeq) protein TPX2 (A)	--	PREDICTED: protein TPX2-like isoform X1 [Glycine max]	RecName: Full=Protein TPX2; Short=AtTPX2; AltName: Full=Targeting protein for XKLP2;	SubName: Full=Uncharacterized protein {ECO:0000313|EnsemblPlants:GLYMA01G42300.2};	--	GO:0009941,chloroplast envelope; GO:0005874,microtubule; GO:0005654,nucleoplasm; GO:0005634,nucleus; GO:0009524,phragmoplast; GO:0005819,spindle; GO:0008017,microtubule binding; GO:0032147,activation of protein kinase activity; GO:0051301,cell division; GO:0000278,mitotic cell cycle; GO:0090307,mitotic spindle assembly; GO:0060236,regulation of mitotic spindle organization; GO:0051225,spindle ass…	PF12214.8:Cell cycle regulated microtubule associated protein
Glyma.02G300800	5	Chr02	47693027	47701367	--	--	PREDICTED: probable L-type lectin-domain containing receptor kinase S.7 [Glycine max]	RecName: Full=Probable L-type lectin-domain containing receptor kinase S.7 {ECO:0000303|PubMed:19773388}; Short=LecRK-S.7 {ECO:0000303|PubMed:19773388}; EC=2.7.11.1 {ECO:0000255|PROSITE-ProRule:PRU00159}; Flags: Precursor;	SubName: Full=Putative L-type lectin-domain containing receptor kinase S.7 {ECO:0000313|EMBL:KHN23841.1}; EC=2.7.10.1 {ECO:0000313|EMBL:KHN23841.1};	--	GO:0016021,integral component of membrane; GO:0005886,plasma membrane; GO:0005524,ATP binding; GO:0030246,carbohydrate binding; GO:0004674,protein serine/threonine kinase activity; GO:0002229,defense response to oomycetes	--
Glyma.01G214200	7	Chr01	54530535	54532622	K05277 leucoanthocyanidin dioxygenase [EC:1.14.11.19] | (RefSeq) ANS, ANS2, ANS3; anthocyanidin synthase (A)	ko00941: Flavonoid biosynthesis	anthocyanidin synthase [Glycine max]	RecName: Full=Leucoanthocyanidin dioxygenase; Short=LDOX; Short=Leucocyanidin oxygenase; EC=1.14.11.19 {ECO:0000250|UniProtKB:Q96323}; AltName: Full=Leucoanthocyanidin hydroxylase;	SubName: Full=Uncharacterized protein {ECO:0000313|EMBL:ACU19542.1, ECO:0000313|EnsemblPlants:GLYMA01G42350.1};	Iron/ascorbate family oxidoreductases	GO:0031418,L-ascorbic acid binding; GO:0050589,leucocyanidin oxygenase activity; GO:0046872,metal ion binding; GO:0009718,anthocyanin-containing compound biosynthetic process	PF03171.20:2OG-Fe(II) oxygenase superfamily
Glyma.01G214300	3	Chr01	54534491	54538724	--	--	PREDICTED: PGR5-like protein 1A, chloroplastic [Glycine max]	RecName: Full=PGR5-like protein 1A, chloroplastic; AltName: Full=Ferredoxin-plastoquinone reductase 1; Flags: Precursor;	SubName: Full=Uncharacterized protein {ECO:0000313|EMBL:KRH77457.1, ECO:0000313|EnsemblPlants:GLYMA01G42360.3};	--	GO:0009507,chloroplast; GO:0009534,chloroplast thylakoid; GO:0009535,chloroplast thylakoid membrane; GO:0016021,integral component of membrane; GO:0009579,thylakoid; GO:0042802,identical protein binding; GO:0016730,oxidoreductase activity, acting on iron-sulfur proteins as donors; GO:0019904,protein domain specific binding; GO:0015979,photosynthesis; GO:0009773,photosynthetic electron transport i…	--
Glyma.02G303800	5	Chr02	47896187	47900062	K08064 nuclear transcription factor Y, alpha | (RefSeq) nuclear transcription factor Y subunit A-1-like isoform X1 (A)	--	uncharacterized protein LOC102664020 [Glycine max]	RecName: Full=Nuclear transcription factor Y subunit A-9; Short=AtNF-YA-9;	SubName: Full=Nuclear transcription factor Y subunit A-9 {ECO:0000313|EMBL:KHN43929.1};	CCAAT-binding factor, subunit B (HAP2)	GO:0016602,CCAAT-binding factor complex; GO:0003677,DNA binding; GO:0003700,DNA-binding transcription factor activity; GO:0009793,embryo development ending in seed dormancy; GO:0055046,microgametogenesis; GO:0045892,negative regulation of transcription, DNA-templated; GO:0009555,pollen development; GO:0048316,seed development; GO:0010262,somatic embryogenesis; GO:0006351,transcription, DNA-templa…	PF02045.15:CCAAT-binding transcription factor (CBF-B/NF-YA) subunit B
Glyma.01G215700	3	Chr01	54624114	54638189	K16250 DNA-directed RNA polymerase IV subunit 1 [EC:2.7.7.6] | (RefSeq) DNA-directed RNA polymerase IV subunit 1-like (A)	--	PREDICTED: DNA-directed RNA polymerase IV subunit 1-like isoform X1 [Glycine max]	RecName: Full=DNA-directed RNA polymerase IV subunit 1; AltName: Full=DNA-directed RNA polymerase D subunit 1; Short=AtNRPD1a; Short=Nuclear RNA polymerase D 1a; EC=2.7.7.6; AltName: Full=Protein RNA-DIRECTED DNA METHYLATION DEFECTIVE 3; AltName: Full=Protein SILENCING DEFECTIVE 4; AltName: Full=Protein SILENCING MOVEMENT DEFICIENT 2; AltName: Full=RNA polymerase IV subunit 1a; Short=POL IV 1a;	RecName: Full=DNA-directed RNA polymerase subunit {ECO:0000256|RuleBase:RU004279}; EC=2.7.7.6 {ECO:0000256|RuleBase:RU004279};	RNA polymerase II, large subunit	GO:0005666,RNA polymerase III complex; GO:0000418,RNA polymerase IV complex; GO:0005654,nucleoplasm; GO:0005634,nucleus; GO:0003677,DNA binding; GO:0003899,DNA-directed 5'-3' RNA polymerase activity; GO:0046872,metal ion binding; GO:0031047,gene silencing by RNA; GO:0010495,long-distance posttranscriptional gene silencing; GO:0030422,production of siRNA involved in RNA interference; GO:0006355,re…	PF00623.20:RNA polymerase Rpb1, domain 2
Glyma.01G217100	7	Chr01	54741290	54746782	K04424 sterile alpha motif and leucine zipper containing kinase AZK [EC:2.7.11.25] | (RefSeq) serine/threonine-protein kinase EDR1-like (A)	--	PREDICTED: probable serine/threonine-protein kinase DDB_G0271682 isoform X1 [Glycine max]	RecName: Full=Probable serine/threonine-protein kinase SIS8 {ECO:0000305}; EC=2.7.11.1 {ECO:0000305}; AltName: Full=MAPKK kinase SIS8 {ECO:0000305}; AltName: Full=Protein SUGAR INSENSITIVE 8 {ECO:0000303|PubMed:24320620};	SubName: Full=Uncharacterized protein {ECO:0000313|EMBL:KRH77494.1, ECO:0000313|EnsemblPlants:GLYMA01G42610.2};	Tyrosine kinase specific for activated (GTP-bound) p21cdc42Hs	GO:0005634,nucleus; GO:0005524,ATP binding; GO:0004672,protein kinase activity; GO:0004674,protein serine/threonine kinase activity; GO:0004712,protein serine/threonine/tyrosine kinase activity; GO:0004871,NA; GO:0035556,intracellular signal transduction; GO:0006468,protein phosphorylation; GO:0009651,response to salt stress; GO:0010182,sugar mediated signaling pathway	PF07714.17:Protein tyrosine kinase
Glyma.02G307400	5	Chr02	48169699	48172204	K22374 3''-deamino-3''-oxonicotianamine reductase [EC:1.1.1.285] | (RefSeq) NAD(P)H-dependent 6'-deoxychalcone synthase isoform X1 (A)	--	uncharacterized protein LOC100306425 [Glycine max]	--	SubName: Full=Uncharacterized protein {ECO:0000313|EMBL:KHN43966.1};	--	--	--
Glyma.01G218400	2	Chr01	54842601	54846844	K13667 protein glucosyltransferase [EC:2.4.1.-] | (RefSeq) hypothetical protein (A)	ko00514: Other types of O-glycan biosynthesis	PREDICTED: O-glucosyltransferase rumi homolog [Glycine max]	--	SubName: Full=Uncharacterized protein {ECO:0000313|EMBL:KRH77520.1, ECO:0000313|EnsemblPlants:GLYMA01G42740.1};	Endoplasmic reticulum protein EP58, contains filamin rod domain and KDEL motif	GO:0012505,endomembrane system; GO:0005768,endosome; GO:0016021,integral component of membrane; GO:0005802,trans-Golgi network; GO:0046527,glucosyltransferase activity; GO:0006664,glycolipid metabolic process	PF05686.12:Glycosyl transferase family 90
Glyma.02G308900	5	Chr02	48264660	48266797	--	--	PREDICTED: uncharacterized protein LOC100805720 [Glycine max]	--	SubName: Full=Uncharacterized protein {ECO:0000313|EMBL:KHN29863.1};	--	GO:0016021,integral component of membrane	--
Glyma.01G219000	1	Chr01	54870113	54875022	K17686 Cu+-exporting ATPase [EC:3.6.3.54] | (RefSeq) probable copper-transporting ATPase HMA5 (A)	ko04016: MAPK signaling pathway - plant	hypothetical protein GLYMA_01G219000 [Glycine max]	RecName: Full=Probable copper-transporting ATPase HMA5; EC=3.6.3.54; AltName: Full=Probable copper-transporting ATPase 3; AltName: Full=Protein HEAVY METAL ATPASE 5;	SubName: Full=Uncharacterized protein {ECO:0000313|EMBL:KRH77528.1};	Cation transport ATPase	GO:0005887,integral component of plasma membrane; GO:0043231,intracellular membrane-bounded organelle; GO:0005524,ATP binding; GO:0005388,calcium-transporting ATPase activity; GO:0005507,copper ion binding; GO:0006825,copper ion transport; GO:0010273,detoxification of copper ion; GO:0046688,response to copper ion	PF00122.20:E1-E2 ATPase
Glyma.01G219200	7	Chr01	54889915	54895017	K18999 RNA polymerase II C-terminal domain phosphatase-like 3/4 [EC:3.1.3.16] | (RefSeq) RNA polymerase II C-terminal domain phosphatase-like 4 (A)	--	hypothetical protein GLYMA_01G219200 [Glycine max]	RecName: Full=FT-interacting protein 1 {ECO:0000303|PubMed:22529749};	SubName: Full=Uncharacterized protein {ECO:0000313|EMBL:KRH77531.1, ECO:0000313|EnsemblPlants:GLYMA01G42820.2};	--	GO:0005783,endoplasmic reticulum; GO:0005789,endoplasmic reticulum membrane; GO:0016021,integral component of membrane; GO:0009506,plasmodesma; GO:0009511,plasmodesmatal endoplasmic reticulum; GO:0008565,protein transporter activity; GO:0016757,transferase activity, transferring glycosyl groups; GO:0034613,cellular protein localization; GO:0009908,flower development; GO:0048574,long-day photoperi…	PF08372.10:Plant phosphoribosyltransferase C-terminal
Glyma.02G309500	5	Chr02	48295104	48297398	K08909 light-harvesting complex I chlorophyll a/b binding protein 3 | (RefSeq) chlorophyll a-b binding protein 8, chloroplastic (A)	ko00196: Photosynthesis - antenna proteins	Chlorophyll a-b binding protein 3, chloroplastic [Glycine soja]	RecName: Full=Chlorophyll a-b binding protein 3, chloroplastic; AltName: Full=LHCII type III CAB-3; Flags: Precursor;	RecName: Full=Chlorophyll a-b binding protein, chloroplastic {ECO:0000256|RuleBase:RU363080};	--	GO:0009535,chloroplast thylakoid membrane; GO:0016021,integral component of membrane; GO:0009522,photosystem I; GO:0009523,photosystem II; GO:0016168,chlorophyll binding; GO:0046872,metal ion binding; GO:0009765,photosynthesis, light harvesting; GO:0018298,protein-chromophore linkage	PF00504.21:Chlorophyll A-B binding protein
Glyma.01G219600	7	Chr01	54903061	54907529	--	--	PREDICTED: AT-hook motif nuclear-localized protein 5-like [Glycine max]	RecName: Full=AT-hook motif nuclear-localized protein 5 {ECO:0000312|EMBL:FAA00276.1};	SubName: Full=Uncharacterized protein {ECO:0000313|EMBL:KRH77535.1, ECO:0000313|EnsemblPlants:GLYMA01G42870.1};	--	GO:0005634,nucleus; GO:0003677,DNA binding; GO:0006355,regulation of transcription, DNA-templated; GO:0006351,transcription, DNA-templated	PF03479.15:Plants and Prokaryotes Conserved (PCC) domain
Glyma.03G007400	5	Chr03	667755	668886	--	--	PREDICTED: uncharacterized protein LOC100776350 [Glycine max]	--	SubName: Full=Uncharacterized protein {ECO:0000313|EMBL:KRH64969.1, ECO:0000313|EnsemblPlants:GLYMA03G00970.1};	--	--	--
Glyma.01G221100	3	Chr01	55018468	55020621	K03539 ribonuclease P/MRP protein subunit RPP1 [EC:3.1.26.5] | (RefSeq) uncharacterized LOC101783073 (A)	ko03008: Ribosome biogenesis in eukaryotes; ko03013: RNA transport	PREDICTED: uncharacterized protein LOC100798428 [Glycine max]	RecName: Full=Zinc finger protein CONSTANS-LIKE 4;	SubName: Full=Uncharacterized protein {ECO:0000313|EMBL:KRH77565.1, ECO:0000313|EnsemblPlants:GLYMA01G43001.1};	--	GO:0005634,nucleus; GO:0008270,zinc ion binding; GO:0009909,regulation of flower development; GO:0009416,response to light stimulus	PF06203.14:CCT motif
Glyma.01G221600	3	Chr01	55067816	55073251	K14780 ATP-dependent RNA helicase DHX37/DHR1 [EC:3.6.4.13] | (RefSeq) ATP-dependent RNA helicase DEAH13-like isoform X1 (A)	--	PREDICTED: uncharacterized protein LOC100801444 [Glycine max]	--	SubName: Full=Uncharacterized protein {ECO:0000313|EMBL:KRH77575.1, ECO:0000313|EnsemblPlants:GLYMA01G43050.1};	Galactosyltransferases	GO:0016021,integral component of membrane	PF04646.12:Protein of unknown function, DUF604
Glyma.01G222600	12	Chr01	55141598	55142782	K03239 translation initiation factor eIF-2B subunit alpha | (RefSeq) methylthioribose-1-phosphate isomerase (A)	ko03013: RNA transport	PREDICTED: protein LURP-one-related 17-like [Glycine max]	RecName: Full=Protein LURP-one-related 17;	SubName: Full=Uncharacterized protein {ECO:0000313|EMBL:KRH77592.1, ECO:0000313|EnsemblPlants:GLYMA01G43180.1};	--	--	PF04525.12:LURP-one-related
Glyma.01G222700	4	Chr01	55163018	55172994	K13447 respiratory burst oxidase [EC:1.6.3.- 1.11.1.-] | (RefSeq) respiratory burst oxidase homolog protein A-like (A)	ko04016: MAPK signaling pathway - plant; ko04626: Plant-pathogen interaction	PREDICTED: respiratory burst oxidase homolog protein A-like [Glycine max]	RecName: Full=Respiratory burst oxidase homolog protein F; EC=1.11.1.-; EC=1.6.3.-; AltName: Full=Cytochrome b245 beta chain homolog RbohAp108; AltName: Full=NADPH oxidase RBOHF; Short=AtRBOHF;	SubName: Full=Uncharacterized protein {ECO:0000313|EMBL:KRH77593.1, ECO:0000313|EnsemblPlants:GLYMA01G43190.1};	Ferric reductase, NADH/NADPH oxidase and related proteins	GO:0016021,integral component of membrane; GO:0005622,intracellular; GO:0005886,plasma membrane; GO:0005509,calcium ion binding; GO:0016174,NAD(P)H oxidase activity; GO:0004601,peroxidase activity; GO:0009738,abscisic acid-activated signaling pathway; GO:0033500,carbohydrate homeostasis; GO:0052542,defense response by callose deposition; GO:0009873,ethylene-activated signaling pathway; GO:0050665…	PF08030.12:Ferric reductase NAD binding domain
Glyma.01G223000	8	Chr01	55185365	55187279	--	--	PREDICTED: probable membrane-associated kinase regulator 2 [Glycine max]	RecName: Full=Probable membrane-associated kinase regulator 2;	SubName: Full=Uncharacterized protein {ECO:0000313|EMBL:KRH77596.1, ECO:0000313|EnsemblPlants:GLYMA01G43220.1};	--	GO:0005886,plasma membrane	--
Glyma.01G223900	2	Chr01	55257831	55266903	K01792 glucose-6-phosphate 1-epimerase [EC:5.1.3.15] | (RefSeq) putative glucose-6-phosphate 1-epimerase (A)	ko00010: Glycolysis / Gluconeogenesis	PREDICTED: putative glucose-6-phosphate 1-epimerase [Glycine max]	RecName: Full=Putative glucose-6-phosphate 1-epimerase {ECO:0000250|UniProtKB:Q03161}; EC=5.1.3.15 {ECO:0000250|UniProtKB:Q03161}; AltName: Full=Putative D-hexose-6-phosphate mutarotase {ECO:0000250|UniProtKB:Q03161}; AltName: Full=Putative apospory-associated protein C;	RecName: Full=Glucose-6-phosphate 1-epimerase {ECO:0000256|PIRNR:PIRNR016020}; EC=5.1.3.15 {ECO:0000256|PIRNR:PIRNR016020};	Uncharacterized enzymes related to aldose 1-epimerase	GO:0030246,carbohydrate binding; GO:0047938,glucose-6-phosphate 1-epimerase activity; GO:0005975,carbohydrate metabolic process	PF01263.20:Aldose 1-epimerase
Glyma.01G224000	7	Chr01	55268994	55272482	K13416 brassinosteroid insensitive 1-associated receptor kinase 1 [EC:2.7.10.1 2.7.11.1] | (RefSeq) BRASSINOSTEROID INSENSITIVE 1-associated receptor kinase 1-like (A)	ko04016: MAPK signaling pathway - plant; ko04075: Plant hormone signal transduction; ko04626: Plant-pathogen interaction	PREDICTED: probable inactive receptor kinase At4g23740 [Glycine max]	RecName: Full=Probable inactive receptor kinase At4g23740; Flags: Precursor;	SubName: Full=Uncharacterized protein {ECO:0000313|EMBL:KRH77622.1, ECO:0000313|EnsemblPlants:GLYMA01G43340.2};	--	GO:0016021,integral component of membrane; GO:0005886,plasma membrane; GO:0005524,ATP binding; GO:0004672,protein kinase activity	PF00069.25:Protein kinase domain
Glyma.01G224700	8	Chr01	55346298	55349501	K14299 nucleoporin SEH1 | (RefSeq) protein SEH1-like (A)	ko03013: RNA transport	PREDICTED: protein SEH1-like isoform X1 [Glycine max]	RecName: Full=Protein SEH1 {ECO:0000303|PubMed:21189294};	SubName: Full=Uncharacterized protein {ECO:0000313|EMBL:KRH77634.1, ECO:0000313|EnsemblPlants:GLYMA01G43410.1};	Nuclear pore complex component (sc Seh1)	GO:0005737,cytoplasm; GO:0005635,nuclear envelope; GO:0005643,nuclear pore; GO:0017056,structural constituent of nuclear pore; GO:0051028,mRNA transport; GO:1904263,positive regulation of TORC1 signaling; GO:0015031,protein transport	PF00400.32:WD domain, G-beta repeat
Glyma.01G224900	7	Chr01	55354540	55358846	K09422 transcription factor MYB, plant | (RefSeq) MYB-like transcription factor ETC3 isoform X1 (A)	--	transcription factor CPC-like [Glycine max]	RecName: Full=Transcription factor CPC; AltName: Full=Protein CAPRICE;	SubName: Full=Transcription factor MYB363 {ECO:0000313|EMBL:ACT82839.1};	--	GO:0005634,nucleus; GO:0003700,DNA-binding transcription factor activity; GO:0000981,DNA-binding transcription factor activity, RNA polymerase II-specific; GO:0043565,sequence-specific DNA binding; GO:0001135,RNA polymerase II transcription regulator recruiting activity; GO:0044212,transcription regulatory region DNA binding; GO:0009913,epidermal cell differentiation; GO:0007275,multicellular org…	PF00249.31:Myb-like DNA-binding domain
Glyma.01G225900	1	Chr01	55458268	55464187	K17065 dynamin 1-like protein [EC:3.6.5.5] | (RefSeq) dynamin GTPase (A)	--	PREDICTED: dynamin-related protein 5A-like [Glycine max]	RecName: Full=Dynamin-related protein 5A; AltName: Full=Soybean dynamin-like protein 5A; Short=SDL5A;	SubName: Full=Uncharacterized protein {ECO:0000313|EMBL:KRH77654.1, ECO:0000313|EnsemblPlants:GLYMA01G43550.1};	Vacuolar sorting protein VPS1, dynamin, and related proteins	GO:0005737,cytoplasm; GO:0005874,microtubule; GO:0009524,phragmoplast; GO:0005525,GTP binding; GO:0003924,GTPase activity; GO:0008017,microtubule binding; GO:0007049,cell cycle; GO:0051301,cell division; GO:0000266,mitochondrial fission	PF01031.20:Dynamin central region
Glyma.03G025600	5	Chr03	2786617	2791610	K15198 transcription factor TFIIIB component B'' | (RefSeq) uncharacterized protein LOC8069083 isoform X1 (A)	--	PREDICTED: uncharacterized protein LOC100781148 isoform X1 [Glycine max]	--	SubName: Full=Uncharacterized protein {ECO:0000313|EMBL:KRH65291.1, ECO:0000313|EnsemblPlants:GLYMA03G02940.1};	--	--	PF10248.9:Myelodysplasia-myeloid leukemia factor 1-interacting protein
Glyma.03G026000	5	Chr03	2813567	2814916	--	--	PREDICTED: uncharacterized protein LOC100783654 [Glycine max]	--	SubName: Full=Uncharacterized protein {ECO:0000313|EMBL:KRH65296.1, ECO:0000313|EnsemblPlants:GLYMA03G02980.1};	--	--	PF07279.11:Protein of unknown function (DUF1442)
Glyma.01G226200	6	Chr01	55472017	55475182	K14544 U3 small nucleolar RNA-associated protein 22 | (RefSeq) hypothetical protein (A)	ko03008: Ribosome biogenesis in eukaryotes	PREDICTED: phosphatidylinositol 4-kinase gamma 2-like [Glycine max]	RecName: Full=Phosphatidylinositol 4-kinase gamma 4; Short=AtPI4Kgamma4; Short=PI-4Kgamma4; Short=PI4K gamma 4; EC=2.7.1.67; AltName: Full=Ubiquitin-like domain kinase gamma 4; Short=UbDK gamma 4;	SubName: Full=Uncharacterized protein {ECO:0000313|EMBL:KRH77661.1, ECO:0000313|EnsemblPlants:GLYMA01G43580.1};	Phosphatidylinositol 4-kinase	GO:0005829,cytosol; GO:0016020,membrane; GO:0004430,1-phosphatidylinositol 4-kinase activity; GO:0005524,ATP binding; GO:0004674,protein serine/threonine kinase activity; GO:0046854,phosphatidylinositol phosphorylation; GO:0046777,protein autophosphorylation; GO:0009651,response to salt stress	PF00454.27:Phosphatidylinositol 3- and 4-kinase
Glyma.01G226600	7	Chr01	55497641	55500565	K14494 DELLA protein | (RefSeq) hypothetical protein (A)	ko04075: Plant hormone signal transduction	PREDICTED: scarecrow-like protein 3 [Glycine max]	RecName: Full=Scarecrow-like protein 3; Short=AtSCL3; AltName: Full=GRAS family protein 5; Short=AtGRAS-5;	SubName: Full=Uncharacterized protein {ECO:0000313|EMBL:KRH77666.1, ECO:0000313|EnsemblPlants:GLYMA01G43620.1};	--	GO:0005634,nucleus; GO:0003700,DNA-binding transcription factor activity; GO:0043565,sequence-specific DNA binding; GO:0000989,NA; GO:0006355,regulation of transcription, DNA-templated; GO:0009739,response to gibberellin; GO:0006351,transcription, DNA-templated	PF03514.14:GRAS domain family
Glyma.01G226700	9	Chr01	55505550	55515233	K03404 magnesium chelatase subunit D [EC:6.6.1.1] | (RefSeq) magnesium-chelatase subunit ChlD, chloroplastic (A)	ko00860: Porphyrin and chlorophyll metabolism	PREDICTED: magnesium-chelatase subunit ChlD, chloroplastic isoform X1 [Glycine max]	RecName: Full=Magnesium-chelatase subunit ChlD, chloroplastic; Short=Mg-chelatase subunit D; EC=6.6.1.1; AltName: Full=Mg-protoporphyrin IX chelatase subunit ChlD; Flags: Precursor;	RecName: Full=Mg-protoporphyrin IX chelatase {ECO:0000256|RuleBase:RU362087}; EC=6.6.1.1 {ECO:0000256|RuleBase:RU362087};	--	GO:0009507,chloroplast; GO:0005524,ATP binding; GO:0016851,magnesium chelatase activity; GO:0015995,chlorophyll biosynthetic process; GO:0015979,photosynthesis	PF17863.1:AAA lid domain
Glyma.01G226800	12	Chr01	55515509	55520792	K06963 tRNA acetyltransferase TAN1 | (RefSeq) THUMP domain-containing protein 1 homolog (A)	--	PREDICTED: THUMP domain-containing protein 1 homolog isoform X1 [Glycine max]	--	SubName: Full=Uncharacterized protein {ECO:0000313|EMBL:KRH77670.1, ECO:0000313|EnsemblPlants:GLYMA01G43640.1};	THUMP domain-containing proteins	GO:0003723,RNA binding; GO:0006400,tRNA modification	PF02926.17:THUMP domain
Glyma.03G036600	5	Chr03	4432910	4435002	K01870 isoleucyl-tRNA synthetase [EC:6.1.1.5] | (RefSeq) hypothetical protein (A)	ko00970: Aminoacyl-tRNA biosynthesis	PREDICTED: transcription repressor OFP1 [Glycine max]	RecName: Full=Transcription repressor OFP4; AltName: Full=Ovate family protein 4; Short=AtOFP4;	SubName: Full=Uncharacterized protein {ECO:0000313|EMBL:KHN43740.1};	--	GO:0005634,nucleus; GO:0003677,DNA binding; GO:0045892,negative regulation of transcription, DNA-templated; GO:2000652,regulation of secondary cell wall biogenesis; GO:0006351,transcription, DNA-templated	PF04844.13:Transcriptional repressor, ovate
Glyma.01G228700	6	Chr01	55659010	55660950	K00660 chalcone synthase [EC:2.3.1.74] | (RefSeq) chalcone synthase 7 (A)	ko00941: Flavonoid biosynthesis; ko04712: Circadian rhythm - plant	chalcone synthase 7 [Glycine max]	RecName: Full=Chalcone synthase 7; EC=2.3.1.74; AltName: Full=Naringenin-chalcone synthase 7;	SubName: Full=Uncharacterized protein {ECO:0000313|EMBL:KRH77699.1};	--	GO:0016210,naringenin-chalcone synthase activity; GO:0009813,flavonoid biosynthetic process	PF00195.19:Chalcone and stilbene synthases, N-terminal domain
Glyma.01G229400	4	Chr01	55717393	55722554	K12811 ATP-dependent RNA helicase DDX46/PRP5 [EC:3.6.4.13] | (RefSeq) DEAD-box ATP-dependent RNA helicase 42-like (A)	ko03040: Spliceosome	PREDICTED: DEAD-box ATP-dependent RNA helicase 42-like [Glycine max]	RecName: Full=DEAD-box ATP-dependent RNA helicase 42; EC=3.6.4.13; AltName: Full=DEAD-box RNA helicase RCF1; AltName: Full=REGULATOR OF CBF GENE EXPRESSION 1;	SubName: Full=Uncharacterized protein {ECO:0000313|EMBL:KRH77709.1, ECO:0000313|EnsemblPlants:GLYMA01G43960.3};	RNA helicase	GO:0005737,cytoplasm; GO:0005730,nucleolus; GO:0005524,ATP binding; GO:0004004,ATP-dependent RNA helicase activity; GO:0003723,RNA binding; GO:0000398,mRNA splicing, via spliceosome; GO:0010468,regulation of gene expression; GO:0010501,RNA secondary structure unwinding	PF00270.29:DEAD/DEAH box helicase
Glyma.01G229800	10	Chr01	55744873	55747557	K20093 DNA excision repair protein ERCC-6-like [EC:3.6.4.12] | (RefSeq) SNF2 super family (A)	--	PREDICTED: uncharacterized protein LOC100785369 [Glycine max]	RecName: Full=Protein MET1, chloroplastic {ECO:0000303|PubMed:25587003}; AltName: Full=PDZ domain, K-box domain, and TPR region containing protein {ECO:0000303|PubMed:15914918}; Flags: Precursor;	SubName: Full=Uncharacterized protein {ECO:0000313|EMBL:KRH77719.1, ECO:0000313|EnsemblPlants:GLYMA01G44000.1};	--	GO:0009507,chloroplast; GO:0009941,chloroplast envelope; GO:0031969,chloroplast membrane; GO:0009570,chloroplast stroma; GO:0009534,chloroplast thylakoid; GO:0009535,chloroplast thylakoid membrane; GO:0009575,chromoplast stroma; GO:0035448,extrinsic component of thylakoid membrane; GO:0009523,photosystem II; GO:0009579,thylakoid; GO:0015979,photosynthesis; GO:0010207,photosystem II assembly; GO:0…	PF13180.6:PDZ domain
Glyma.01G230300	8	Chr01	55779511	55781836	--	--	PREDICTED: uncharacterized protein LOC100786959 [Glycine max]	--	SubName: Full=Uncharacterized protein {ECO:0000313|EMBL:KRH77725.1, ECO:0000313|EnsemblPlants:GLYMA01G44050.1};	--	GO:0016021,integral component of membrane	--
Glyma.03G042400	5	Chr03	5358718	5363774	K14685 solute carrier family 40 (iron-regulated transporter), member 1 | (RefSeq) solute carrier family 40 member 2-like (A)	--	PREDICTED: solute carrier family 40 member 2-like [Glycine max]	RecName: Full=Solute carrier family 40 member 2; AltName: Full=Ferroportin-2; AltName: Full=Iron-regulated transporter 2; Short=AtIREG2;	SubName: Full=Uncharacterized protein {ECO:0000313|EMBL:KRH65523.1, ECO:0000313|EnsemblPlants:GLYMA03G05190.1};	Iron transporter	GO:0016021,integral component of membrane; GO:0009705,plant-type vacuole membrane; GO:0015087,cobalt ion transmembrane transporter activity; GO:0005381,iron ion transmembrane transporter activity; GO:0010106,cellular response to iron ion starvation; GO:0055068,cobalt ion homeostasis; GO:0006824,cobalt ion transport; GO:0006826,iron ion transport; GO:0035444,nickel cation transmembrane transport; …	PF06963.12:Ferroportin1 (FPN1)
Glyma.01G231800	4	Chr01	55864526	55866947	--	--	PREDICTED: uncharacterized protein LOC100791546 [Glycine max]	--	SubName: Full=Uncharacterized protein {ECO:0000313|EMBL:KRH77753.1, ECO:0000313|EnsemblPlants:GLYMA01G44210.1};	--	--	PF04720.12:PDDEXK-like family of unknown function
Glyma.01G231900	10	Chr01	55869836	55872417	--	--	hypothetical protein GLYMA_01G231900 [Glycine max]	--	SubName: Full=Uncharacterized protein {ECO:0000313|EMBL:KRH77754.1, ECO:0000313|EnsemblPlants:GLYMA01G44220.2};	--	GO:0051537,2 iron, 2 sulfur cluster binding; GO:0008942,nitrite reductase [NAD(P)H] activity; GO:0042128,nitrate assimilation	PF13806.6:Rieske-like [2Fe-2S] domain
Glyma.03G052200	5	Chr03	6902165	6905344	--	--	PREDICTED: UPF0098 protein CPn_0877/CP_0992/CPj0877/CpB0906-like [Glycine max]	--	SubName: Full=Uncharacterized protein {ECO:0000313|EMBL:KRH65647.1, ECO:0000313|EnsemblPlants:GLYMA03G06780.1};	--	--	PF01161.20:Phosphatidylethanolamine-binding protein
Glyma.01G233600	6	Chr01	55984040	55989532	K12811 ATP-dependent RNA helicase DDX46/PRP5 [EC:3.6.4.13] | (RefSeq) uncharacterized protein LOC106427234 (A)	ko03040: Spliceosome	PREDICTED: WEB family protein At3g02930, chloroplastic-like [Glycine max]	RecName: Full=WEB family protein At3g02930, chloroplastic; Flags: Precursor;	SubName: Full=Uncharacterized protein {ECO:0000313|EMBL:KRH77783.1, ECO:0000313|EnsemblPlants:GLYMA01G44390.1};	--	GO:0009507,chloroplast; GO:0005783,endoplasmic reticulum; GO:0005875,microtubule associated complex; GO:0000795,synaptonemal complex; GO:0007131,reciprocal meiotic recombination	PF05701.11:Weak chloroplast movement under blue light
Glyma.01G234300	8	Chr01	56040889	56049831	--	--	PREDICTED: uncharacterized protein LOC100797363 isoform X1 [Glycine max]	--	SubName: Full=Uncharacterized protein {ECO:0000313|EMBL:KRH77795.1, ECO:0000313|EnsemblPlants:GLYMA01G44460.4};	--	GO:0046872,metal ion binding	PF00628.29:PHD-finger
Glyma.01G234400	8	Chr01	56057736	56063518	K22382 WD repeat-containing protein 26 | (RefSeq) WD repeat-containing protein 26 homolog (A)	--	PREDICTED: growth-regulating factor 4-like [Glycine max]	RecName: Full=Growth-regulating factor 4; Short=OsGRF4; AltName: Full=Transcription activator GRF4;	SubName: Full=Uncharacterized protein {ECO:0000313|EMBL:KRH77798.1, ECO:0000313|EnsemblPlants:GLYMA01G44471.1};	--	GO:0005634,nucleus; GO:0005524,ATP binding; GO:0032502,developmental process; GO:0006355,regulation of transcription, DNA-templated; GO:0006351,transcription, DNA-templated	PF08879.10:WRC
Glyma.01G234500	10	Chr01	56067918	56069668	--	--	PREDICTED: protein CDI-like [Glycine max]	RecName: Full=Protein CDI {ECO:0000305}; AltName: Full=Protein CADMIUM INDUCED {ECO:0000303|PubMed:22569258};	SubName: Full=Uncharacterized protein {ECO:0000313|EMBL:KHN34127.1};	--	GO:0005829,cytosol; GO:0016740,transferase activity; GO:0009846,pollen germination; GO:0009860,pollen tube growth; GO:0007338,single fertilization	--
Glyma.01G235100	3	Chr01	56096377	56097573	--	--	PREDICTED: non-specific lipid transfer protein GPI-anchored 2 [Glycine max]	--	SubName: Full=Uncharacterized protein {ECO:0000313|EMBL:KRH77814.1, ECO:0000313|EnsemblPlants:GLYMA01G44550.2};	--	--	PF14368.6:Probable lipid transfer
Glyma.03G056000	5	Chr03	7705307	7706624	--	--	RecName: Full=Protein SLE2; AltName: Full=Em protein; AltName: Full=Protein Glycine max physiologically mature 11; AltName: Full=Protein GmD-19; AltName: Full=Soybean group-1 late embryogenesis abundant protein 2; AltName: Full=Soybean group-1 lea protein 2; Short=Sle2 KRH65706.1 hypothetical protein GLYMA_03G056000 [Glycine max]	RecName: Full=Protein SLE2 {ECO:0000303|Ref.3}; AltName: Full=Em protein {ECO:0000303|Ref.2}; AltName: Full=Protein Glycine max physiologically mature 11 {ECO:0000303|PubMed:23017910}; AltName: Full=Protein GmD-19 {ECO:0000303|PubMed:11891239}; AltName: Full=Soybean group-1 late embryogenesis abundant protein 2 {ECO:0000303|Ref.3}; AltName: Full=Soybean group-1 lea protein 2 {ECO:0000303|Ref.3}; …	SubName: Full=Uncharacterized protein {ECO:0000313|EMBL:KRH65706.1};	--	GO:0005829,cytosol; GO:0050821,protein stabilization; GO:0009737,response to abscisic acid; GO:0048316,seed development	PF00477.17:Small hydrophilic plant seed protein
Glyma.01G235900	1	Chr01	56146075	56147945	--	--	uncharacterized protein LOC100500129 [Glycine max]	RecName: Full=Protein RDM1; AltName: Full=Protein RNA-directed DNA methylation 1;	SubName: Full=Uncharacterized protein {ECO:0000313|EMBL:ACU15051.1, ECO:0000313|EnsemblPlants:GLYMA01G44630.3};	--	GO:0000419,RNA polymerase V complex; GO:0005654,nucleoplasm; GO:0005634,nucleus; GO:0003677,DNA binding; GO:0043621,protein self-association; GO:0006306,DNA methylation; GO:0070918,production of small RNA involved in gene silencing by RNA; GO:0044030,regulation of DNA methylation	PF09187.10:RNA-directed DNA methylation 1
Glyma.01G236300	7	Chr01	56167008	56172146	K21776 protein lin-54 | (RefSeq) CRC domain-containing protein TSO1-like (A)	--	PREDICTED: protein tesmin/TSO1-like CXC 2 [Glycine max]	RecName: Full=Protein tesmin/TSO1-like CXC 2; Short=AtTCX2; AltName: Full=Protein TSO1-like 2; Short=Protein SOL2;	SubName: Full=Uncharacterized protein {ECO:0000313|EMBL:KRH77830.1, ECO:0000313|EnsemblPlants:GLYMA01G44670.1};	Metallothionein-like protein	GO:0005634,nucleus; GO:0003700,DNA-binding transcription factor activity; GO:0046872,metal ion binding; GO:0043565,sequence-specific DNA binding; GO:0007275,multicellular organism development; GO:0006355,regulation of transcription, DNA-templated	PF03638.15:Tesmin/TSO1-like CXC domain, cysteine-rich domain
Glyma.01G236800	8	Chr01	56204234	56207132	K02930 large subunit ribosomal protein L4e | (RefSeq) 60S ribosomal protein L4-like (A)	ko03010: Ribosome	PREDICTED: uncharacterized protein LOC100806050 isoform X1 [Glycine max]	RecName: Full=Protein MARD1 {ECO:0000303|PubMed:15159630}; AltName: Full=Mediator of ABA-regulated dormancy1 {ECO:0000303|PubMed:15159630}; AltName: Full=Senescence-associated protein SAG102 {ECO:0000303|PubMed:11402199};	SubName: Full=Uncharacterized protein {ECO:0000313|EMBL:KRH77838.1, ECO:0000313|EnsemblPlants:GLYMA01G44730.1};	--	GO:0010494,cytoplasmic stress granule; GO:0000932,P-body; GO:0046872,metal ion binding; GO:0009737,response to abscisic acid; GO:0010162,seed dormancy process	PF04570.14:zinc-finger of the FCS-type, C2-C2
Glyma.01G237000	2	Chr01	56219725	56220716	--	--	PREDICTED: uncharacterized protein LOC100810486 [Glycine max]	--	SubName: Full=Uncharacterized protein {ECO:0000313|EMBL:KHN30483.1};	--	--	PF07911.13:Protein of unknown function (DUF1677)
Glyma.01G238000	9	Chr01	56259741	56260558	K02639 ferredoxin | (RefSeq) ferredoxin C 1, chloroplastic (A)	ko00195: Photosynthesis	2Fe-2S ferredoxin-like superfamily protein [Glycine max]	RecName: Full=Ferredoxin-3, chloroplastic; Short=AtFd3; Flags: Precursor;	SubName: Full=Ferredoxin-3, chloroplastic {ECO:0000313|EMBL:KHN30476.1};	--	GO:0009507,chloroplast; GO:0009536,plastid; GO:0051537,2 iron, 2 sulfur cluster binding; GO:0009055,electron transfer activity; GO:0046872,metal ion binding	PF00111.27:2Fe-2S iron-sulfur cluster binding domain
Glyma.03G058000	5	Chr03	8249390	8252886	K23978 isoamyl acetate esterase [EC:3.1.1.112] | (RefSeq) GDSL esterase/lipase CPRD49 isoform X1 (A)	--	PREDICTED: GDSL esterase/lipase CPRD49-like isoform X1 [Glycine max]	RecName: Full=GDSL esterase/lipase CPRD49; EC=3.1.1.-; AltName: Full=Extracellular lipase CPRD49; Flags: Precursor;	SubName: Full=Uncharacterized protein {ECO:0000313|EMBL:KRH65731.1};	Isoamyl acetate-hydrolyzing esterase	GO:0048046,apoplast; GO:0016787,hydrolase activity; GO:0016042,lipid catabolic process	PF13472.6:GDSL-like Lipase/Acylhydrolase family
Glyma.03G058300	5	Chr03	8280786	8288390	K07300 Ca2+:H+ antiporter | (RefSeq) vacuolar cation/proton exchanger 3-like (A)	--	PREDICTED: vacuolar cation/proton exchanger 3 isoform X4 [Glycine max]	RecName: Full=Vacuolar cation/proton exchanger 3; AltName: Full=Ca(2+)/H(+) antiporter CAX3; AltName: Full=Ca(2+)/H(+) exchanger 3; AltName: Full=Protein CATION EXCHANGER 3;	SubName: Full=Uncharacterized protein {ECO:0000313|EMBL:KRH65739.1};	Ca2+/H+ antiporter VCX1 and related proteins	GO:0016021,integral component of membrane; GO:0009705,plant-type vacuole membrane; GO:0005774,vacuolar membrane; GO:0005773,vacuole; GO:0015369,calcium:proton antiporter activity; GO:0006874,cellular calcium ion homeostasis; GO:0030026,cellular manganese ion homeostasis; GO:0006882,cellular zinc ion homeostasis; GO:0055062,phosphate ion homeostasis; GO:0006793,phosphorus metabolic process; GO:005…	PF01699.24:Sodium/calcium exchanger protein
Glyma.01G238900	2	Chr01	56324256	56325907	--	--	PREDICTED: mavicyanin-like [Glycine max]	RecName: Full=Mavicyanin;	SubName: Full=Mavicyanin {ECO:0000313|EMBL:KHN30467.1};	--	GO:0009055,electron transfer activity; GO:0046872,metal ion binding	PF02298.17:Plastocyanin-like domain
Glyma.01G239000	1	Chr01	56326547	56334800	K05016 chloride channel 7 | (RefSeq) chloride channel protein CLC-d-like (A)	--	PREDICTED: chloride channel protein CLC-d-like isoform X2 [Glycine max]	RecName: Full=Chloride channel protein CLC-d; Short=AtCLC-d; AltName: Full=CBS domain-containing protein CBSCLC2;	RecName: Full=Chloride channel protein {ECO:0000256|RuleBase:RU361221};	Cl- channel CLC-7 and related proteins (CLC superfamily)	GO:0034707,chloride channel complex; GO:0005802,trans-Golgi network; GO:0005247,voltage-gated chloride channel activity; GO:0034765,regulation of ion transmembrane transport; GO:0009826,unidimensional cell growth	PF00654.20:Voltage gated chloride channel
Glyma.01G239200	12	Chr01	56343235	56350434	K12585 exosome complex exonuclease DIS3/RRP44 [EC:3.1.13.-] | (RefSeq) exosome complex exonuclease RRP44 homolog A-like (A)	ko03018: RNA degradation	PREDICTED: ARM REPEAT PROTEIN INTERACTING WITH ABF2-like [Glycine max]	RecName: Full=ARM REPEAT PROTEIN INTERACTING WITH ABF2; Short=ARIA;	SubName: Full=Uncharacterized protein {ECO:0000313|EMBL:KRH77872.1, ECO:0000313|EnsemblPlants:GLYMA01G44970.1};	FOG: Armadillo/beta-catenin-like repeats	GO:0005737,cytoplasm; GO:0005634,nucleus; GO:0005886,plasma membrane; GO:0010187,negative regulation of seed germination; GO:0016567,protein ubiquitination; GO:0009737,response to abscisic acid; GO:0009651,response to salt stress	PF00514.23:Armadillo/beta-catenin-like repeat
Glyma.01G239500	12	Chr01	56360162	56361708	K13258 2-hydroxyisoflavanone dehydratase [EC:4.2.1.105] | (RefSeq) 2-hydroxyisoflavanone dehydratase (A)	ko00943: Isoflavonoid biosynthesis	2-hydroxyisoflavanone dehydratase-like protein [Glycine max]	RecName: Full=2-hydroxyisoflavanone dehydratase; EC=3.1.1.1; EC=4.2.1.105; AltName: Full=Carboxylesterase HIDM;	SubName: Full=Putative carboxylesterase 2 {ECO:0000313|EMBL:KHN30461.1}; EC=3.-.-.- {ECO:0000313|EMBL:KHN30461.1};	Arylacetamide deacetylase	GO:0033987,2-hydroxyisoflavanone dehydratase activity; GO:0052689,carboxylic ester hydrolase activity; GO:0009813,flavonoid biosynthetic process; GO:0009717,isoflavonoid biosynthetic process; GO:0046287,isoflavonoid metabolic process	PF07859.13:alpha/beta hydrolase fold
Glyma.03G058500	5	Chr03	8327045	8331996	K07300 Ca2+:H+ antiporter | (RefSeq) vacuolar cation/proton exchanger 3-like (A)	--	PREDICTED: vacuolar cation/proton exchanger 3 isoform X2 [Glycine max]	RecName: Full=Vacuolar cation/proton exchanger 3; AltName: Full=Ca(2+)/H(+) antiporter CAX3; AltName: Full=Ca(2+)/H(+) exchanger 3; AltName: Full=Protein CATION EXCHANGER 3;	SubName: Full=Uncharacterized protein {ECO:0000313|EMBL:KRH65744.1};	Ca2+/H+ antiporter VCX1 and related proteins	GO:0016021,integral component of membrane; GO:0009705,plant-type vacuole membrane; GO:0005774,vacuolar membrane; GO:0005773,vacuole; GO:0015369,calcium:proton antiporter activity; GO:0006874,cellular calcium ion homeostasis; GO:0030026,cellular manganese ion homeostasis; GO:0006882,cellular zinc ion homeostasis; GO:0055062,phosphate ion homeostasis; GO:0006793,phosphorus metabolic process; GO:005…	PF01699.24:Sodium/calcium exchanger protein
Glyma.01G240300	8	Chr01	56421904	56424317	K01051 pectinesterase [EC:3.1.1.11] | (RefSeq) pectinesterase-like (A)	ko00040: Pentose and glucuronate interconversions	PREDICTED: pectinesterase-like [Glycine max]	RecName: Full=Pectinesterase/pectinesterase inhibitor 18; AltName: Full=AtPMEpcrA; Contains: RecName: Full=Pectinesterase inhibitor 18; AltName: Full=Pectin methylesterase inhibitor 18; Contains: RecName: Full=Bifunctional pectinesterase 18/rRNA N-glycosylase; Short=PE 18; EC=3.1.1.11; EC=3.2.2.22; AltName: Full=Pectin methylesterase 18; AltName: Full=Pectin methylesterase 4; Short=AtPME4; AltNam…	RecName: Full=Pectinesterase {ECO:0000256|RuleBase:RU000589}; EC=3.1.1.11 {ECO:0000256|RuleBase:RU000589};	--	GO:0005618,cell wall; GO:0005829,cytosol; GO:0005576,extracellular region; GO:0005774,vacuolar membrane; GO:0045330,aspartyl esterase activity; GO:0030599,pectinesterase activity; GO:0046910,pectinesterase inhibitor activity; GO:0030598,rRNA N-glycosylase activity; GO:0090729,toxin activity; GO:0042545,cell wall modification; GO:0050832,defense response to fungus; GO:0031640,killing of cells of o…	PF01095.19:Pectinesterase
Glyma.01G240500	7	Chr01	56437481	56441680	--	--	PREDICTED: uncharacterized protein LOC100816371 isoform X1 [Glycine max]	--	SubName: Full=Uncharacterized protein {ECO:0000313|EMBL:KRH77889.1, ECO:0000313|EnsemblPlants:GLYMA01G45125.1};	--	GO:0016021,integral component of membrane	--
Glyma.01G241000	9	Chr01	56460390	56463728	K06883 uncharacterized protein | (RefSeq) LOW QUALITY PROTEIN: uncharacterized protein LOC104799061 (A)	--	Cysteine-rich receptor-like protein kinase 10 [Glycine soja]	RecName: Full=Cysteine-rich receptor-like protein kinase 10; Short=Cysteine-rich RLK10; EC=2.7.11.-; AltName: Full=Receptor-like protein kinase 4; Flags: Precursor;	SubName: Full=Cysteine-rich receptor-like protein kinase 10 {ECO:0000313|EMBL:KHN30448.1}; EC=2.7.11.1 {ECO:0000313|EMBL:KHN30448.1};	--	GO:0016021,integral component of membrane; GO:0005886,plasma membrane; GO:0005524,ATP binding; GO:0004674,protein serine/threonine kinase activity; GO:0042742,defense response to bacterium; GO:0006468,protein phosphorylation	PF07714.17:Protein tyrosine kinase
Glyma.03G113600	5	Chr03	32066847	32080424	K13116 ATP-dependent RNA helicase DDX41 [EC:3.6.4.13] | (RefSeq) uncharacterized protein LOC110093888 isoform X1 (A)	--	PREDICTED: uncharacterized protein LOC100797947 [Glycine max]	RecName: Full=Protein PIN-LIKES 3 {ECO:0000303|PubMed:22504182}; AltName: Full=Auxin efflux carrier-like protein 3 {ECO:0000303|PubMed:22504182};	SubName: Full=Uncharacterized protein {ECO:0000313|EMBL:KRH66552.1, ECO:0000313|EnsemblPlants:GLYMA03G26640.1};	Predicted membrane protein	GO:0005789,endoplasmic reticulum membrane; GO:0016021,integral component of membrane; GO:0009734,auxin-activated signaling pathway; GO:0009733,response to auxin; GO:0055085,transmembrane transport	PF03547.18:Membrane transport protein
Glyma.01G241700	2	Chr01	56554570	56555176	--	--	PREDICTED: uncharacterized protein LOC102670513 [Glycine max]	--	SubName: Full=Uncharacterized protein {ECO:0000313|EMBL:KHN30441.1};	--	--	--
Glyma.01G242000	4	Chr01	56560550	56561713	K16075 magnesium transporter | (RefSeq) magnesium transporter MRS2-3-like (A)	--	PREDICTED: magnesium transporter MRS2-3 [Glycine max]	RecName: Full=Magnesium transporter MRS2-3; AltName: Full=Magnesium Transporter 4; Short=AtMGT4;	SubName: Full=Uncharacterized protein {ECO:0000313|EMBL:KRH77919.1, ECO:0000313|EnsemblPlants:GLYMA01G45290.1};	Magnesium transporters: CorA family	GO:0016021,integral component of membrane; GO:0005886,plasma membrane; GO:0015095,magnesium ion transmembrane transporter activity	PF01544.18:CorA-like Mg2+ transporter protein
Glyma.03G114300	5	Chr03	32130518	32134198	K09338 homeobox-leucine zipper protein | (RefSeq) homeobox-leucine zipper protein HAT3-like (A)	--	PREDICTED: homeobox-leucine zipper protein HAT3-like [Glycine max]	RecName: Full=Homeobox-leucine zipper protein HAT3; AltName: Full=Homeodomain-leucine zipper protein HAT3; Short=HD-ZIP protein 3;	SubName: Full=Uncharacterized protein {ECO:0000313|EMBL:KRH66562.1, ECO:0000313|EnsemblPlants:GLYMA03G26701.1};	Transcription factor HEX, contains HOX and HALZ domains	GO:0005634,nucleus; GO:0003700,DNA-binding transcription factor activity; GO:0043565,sequence-specific DNA binding; GO:0006351,transcription, DNA-templated	PF04618.12:HD-ZIP protein N terminus
Glyma.01G242800	3	Chr01	56604389	56608345	K01859 chalcone isomerase [EC:5.5.1.6] | (RefSeq) vacuolar-sorting receptor 1-like (A)	ko00941: Flavonoid biosynthesis	PREDICTED: vacuolar-sorting receptor 1 [Glycine max]	RecName: Full=Vacuolar-sorting receptor 1; AltName: Full=80 kDa proaleurein-binding protein; AltName: Full=BP-80; Flags: Precursor;	SubName: Full=Uncharacterized protein {ECO:0000313|EMBL:KRH77935.1, ECO:0000313|EnsemblPlants:GLYMA01G45380.1};	--	GO:0030665,clathrin-coated vesicle membrane; GO:0000139,Golgi membrane; GO:0016021,integral component of membrane; GO:0031902,late endosome membrane; GO:0005509,calcium ion binding; GO:0015031,protein transport	PF02225.22:PA domain
Glyma.01G243200	7	Chr01	56617173	56619227	K13416 brassinosteroid insensitive 1-associated receptor kinase 1 [EC:2.7.10.1 2.7.11.1] | (RefSeq) BRASSINOSTEROID INSENSITIVE 1-associated receptor kinase 1 (A)	ko04016: MAPK signaling pathway - plant; ko04075: Plant hormone signal transduction; ko04626: Plant-pathogen interaction	PREDICTED: somatic embryogenesis receptor kinase 1 [Glycine max]	RecName: Full=Leucine-rich repeat protein 1 {ECO:0000303|PubMed:19712067}; Short=AtLRR1 {ECO:0000303|PubMed:19712067}; Flags: Precursor;	SubName: Full=Uncharacterized protein {ECO:0000313|EMBL:KRH77939.1, ECO:0000313|EnsemblPlants:GLYMA01G45420.1};	FOG: Leucine rich repeat	GO:0005886,plasma membrane; GO:0004675,transmembrane receptor protein serine/threonine kinase activity; GO:0007166,cell surface receptor signaling pathway; GO:0006952,defense response; GO:0006468,protein phosphorylation; GO:0007165,signal transduction	PF13855.6:Leucine rich repeat
Glyma.01G243400	10	Chr01	56632794	56634546	--	--	PREDICTED: classical arabinogalactan protein 9-like [Glycine max]	--	SubName: Full=Uncharacterized protein {ECO:0000313|EMBL:KRH77943.1, ECO:0000313|EnsemblPlants:GLYMA01G45440.1};	--	--	--
Glyma.03G116600	5	Chr03	32527885	32532444	K09503 DnaJ homolog subfamily A member 2 | (RefSeq) dnaJ protein homolog 1-like (A)	ko04141: Protein processing in endoplasmic reticulum	PREDICTED: dnaJ protein homolog 1 [Glycine max]	RecName: Full=Chaperone protein dnaJ A6 {ECO:0000305}; Short=OsDjA6 {ECO:0000303|PubMed:23160806};	SubName: Full=Chaperone protein dnaJ 2 {ECO:0000313|EMBL:KHN43746.1};	Molecular chaperone (DnaJ superfamily)	GO:0005737,cytoplasm; GO:0005634,nucleus; GO:0005524,ATP binding; GO:0031072,heat shock protein binding; GO:0046872,metal ion binding; GO:0051082,unfolded protein binding; GO:0006952,defense response; GO:0006457,protein folding; GO:0009408,response to heat; GO:0016032,viral process	PF01556.18:DnaJ C terminal domain
Glyma.03G144400	5	Chr03	36004707	36005955	--	--	late embryogenesis abundant group 4 protein PM9 [Glycine max]	RecName: Full=18 kDa seed maturation protein;	SubName: Full=Late embryogenesis abundant protein {ECO:0000313|EMBL:AAD09208.1}; Flags: Fragment;	--	GO:0048030,disaccharide binding; GO:0070492,oligosaccharide binding; GO:0031210,phosphatidylcholine binding; GO:0009793,embryo development ending in seed dormancy	PF03760.15:Late embryogenesis abundant (LEA) group 1
Glyma.01G244900	6	Chr01	56726966	56736562	K06972 presequence protease [EC:3.4.24.-] | (RefSeq) presequence protease 2, chloroplastic/mitochondrial-like (A)	--	PREDICTED: presequence protease 2, chloroplastic/mitochondrial [Glycine max]	RecName: Full=Presequence protease 2, chloroplastic/mitochondrial; Short=AtPreP2; Short=PreP 2; EC=3.4.24.-; AltName: Full=Zinc metalloprotease 2; Short=AtZnMP2; Flags: Precursor;	SubName: Full=Uncharacterized protein {ECO:0000313|EMBL:KRH77969.1, ECO:0000313|EnsemblPlants:GLYMA01G45650.2};	Metalloendoprotease HMP1 (insulinase superfamily)	GO:0009507,chloroplast; GO:0009570,chloroplast stroma; GO:0005759,mitochondrial matrix; GO:0005739,mitochondrion; GO:0046872,metal ion binding; GO:0008237,metallopeptidase activity; GO:0016485,protein processing	PF08367.11:Peptidase M16C associated
Glyma.03G146700	5	Chr03	36196552	36203201	--	--	PREDICTED: metal tolerance protein 4-like [Glycine max]	RecName: Full=Metal tolerance protein 4; Short=OsMTP4;	SubName: Full=Uncharacterized protein {ECO:0000313|EMBL:KRH67095.1, ECO:0000313|EnsemblPlants:GLYMA03G30290.3};	Mitochondrial Fe2+ transporter MMT1 and related transporters (cation diffusion facilitator superfamily)	GO:0016021,integral component of membrane; GO:0005774,vacuolar membrane; GO:0008324,cation transmembrane transporter activity	PF01545.21:Cation efflux family
Glyma.02G000400	9	Chr02	40099	44249	K13429 chitin elicitor receptor kinase 1 | (RefSeq) chitin elicitor receptor kinase 1-like (A)	ko04626: Plant-pathogen interaction	PREDICTED: lysM domain receptor-like kinase 4 [Glycine max]	RecName: Full=Serine/threonine receptor-like kinase NFP {ECO:0000303|PubMed:16723404}; Short=RLK NFP {ECO:0000303|PubMed:16723404}; AltName: Full=Nod factor perception protein {ECO:0000303|PubMed:12753588}; EC=2.7.10.- {ECO:0000255|PROSITE-ProRule:PRU00159}; AltName: Full=Nod-factor receptor 5; Flags: Precursor;	SubName: Full=Uncharacterized protein {ECO:0000313|EMBL:KRH69047.1, ECO:0000313|EnsemblPlants:GLYMA02G00250.1};	--	GO:0016021,integral component of membrane; GO:0005886,plasma membrane; GO:0005775,vacuolar lumen; GO:0005524,ATP binding; GO:0004713,protein tyrosine kinase activity; GO:0006952,defense response; GO:0009877,nodulation; GO:1902290,positive regulation of defense response to oomycetes; GO:0006486,protein glycosylation; GO:1900150,regulation of defense response to fungus; GO:0002237,response to molec…	PF00069.25:Protein kinase domain
Glyma.02G000500	2	Chr02	56569	58453	K14484 auxin-responsive protein IAA | (RefSeq) auxin-induced protein 22B-like (A)	ko04075: Plant hormone signal transduction	PREDICTED: auxin-induced protein 22B-like [Glycine max]	RecName: Full=Auxin-induced protein 22B; AltName: Full=Indole-3-acetic acid-induced protein ARG4;	RecName: Full=Auxin-induced protein {ECO:0000256|RuleBase:RU004549};	--	GO:0005634,nucleus; GO:0009734,auxin-activated signaling pathway; GO:0006355,regulation of transcription, DNA-templated; GO:0006351,transcription, DNA-templated	PF02309.16:AUX/IAA family
Glyma.02G000700	10	Chr02	74337	78612	--	--	uncharacterized protein LOC100778245 [Glycine max]	RecName: Full=Protein SIEVE ELEMENT OCCLUSION B {ECO:0000303|PubMed:20932300}; Short=AtSEOb {ECO:0000303|PubMed:20932300}; AltName: Full=Protein SIEVE ELEMENT OCCLUSION-RELATED 1 {ECO:0000303|PubMed:22470058}; Short=AtSEOR1 {ECO:0000303|PubMed:22470058};	SubName: Full=Uncharacterized protein {ECO:0000313|EMBL:KHN15402.1};	--	GO:0042803,protein homodimerization activity; GO:0043621,protein self-association; GO:0010088,phloem development	PF14576.6:Sieve element occlusion N-terminus
Glyma.02G001100	9	Chr02	132932	134901	K19861 benzyl alcohol O-benzoyltransferase [EC:2.3.1.196 2.3.1.232] | (RefSeq) benzyl alcohol O-benzoyltransferase-like (A)	--	PREDICTED: benzyl alcohol O-benzoyltransferase [Glycine max]	RecName: Full=Benzyl alcohol O-benzoyltransferase; EC=2.3.1.196; AltName: Full=Benzoyl coenzyme A:benzyl alcohol benzoyl transferase;	SubName: Full=Uncharacterized protein {ECO:0000313|EMBL:KRH69057.1, ECO:0000313|EnsemblPlants:GLYMA02G00340.1};	--	GO:0016747,transferase activity, transferring acyl groups other than amino-acyl groups	PF02458.15:Transferase family
Glyma.03G148800	5	Chr03	36442696	36446038	K01534 Cd2+/Zn2+-exporting ATPase [EC:3.6.3.3 3.6.3.5] | (RefSeq) cadmium/zinc-transporting ATPase HMA3-like (A)	--	PREDICTED: receptor-like cytosolic serine/threonine-protein kinase RBK2 [Glycine max]	RecName: Full=Receptor-like cytosolic serine/threonine-protein kinase RBK2; EC=2.7.11.1; AltName: Full=Protein ROP BINDING PROTEIN KINASES 2;	SubName: Full=Uncharacterized protein {ECO:0000313|EMBL:KRH67129.1, ECO:0000313|EnsemblPlants:GLYMA03G30516.1};	Serine/threonine protein kinase	GO:0005737,cytoplasm; GO:0005634,nucleus; GO:0005886,plasma membrane; GO:0005524,ATP binding; GO:0051020,GTPase binding; GO:0004675,transmembrane receptor protein serine/threonine kinase activity; GO:0007166,cell surface receptor signaling pathway; GO:0006468,protein phosphorylation	PF07714.17:Protein tyrosine kinase
Glyma.02G001500	10	Chr02	175310	178604	K15397 3-ketoacyl-CoA synthase [EC:2.3.1.199] | (RefSeq) 3-ketoacyl-CoA synthase 11-like (A)	ko00062: Fatty acid elongation; ko04626: Plant-pathogen interaction	PREDICTED: 3-ketoacyl-CoA synthase 11-like [Glycine max]	RecName: Full=3-ketoacyl-CoA synthase 11 {ECO:0000303|PubMed:18465198}; Short=KCS-11 {ECO:0000303|PubMed:18465198}; EC=2.3.1.199 {ECO:0000269|PubMed:16765910}; AltName: Full=Very long-chain fatty acid condensing enzyme 11 {ECO:0000303|PubMed:18465198}; Short=VLCFA condensing enzyme 11 {ECO:0000303|PubMed:18465198};	RecName: Full=3-ketoacyl-CoA synthase {ECO:0000256|PIRNR:PIRNR036417}; EC=2.3.1.- {ECO:0000256|PIRNR:PIRNR036417};	--	GO:0016021,integral component of membrane; GO:0102336,3-oxo-arachidoyl-CoA synthase activity; GO:0102337,3-oxo-cerotoyl-CoA synthase activity; GO:0102338,3-oxo-lignoceronyl-CoA synthase activity; GO:0102756,very-long-chain 3-ketoacyl-CoA synthase activity; GO:0006633,fatty acid biosynthetic process; GO:0009409,response to cold; GO:0009416,response to light stimulus	PF08392.12:FAE1/Type III polyketide synthase-like protein
Glyma.02G001700	9	Chr02	203731	205720	--	--	PREDICTED: uncharacterized protein LOC100780569 [Glycine max]	--	SubName: Full=Uncharacterized protein {ECO:0000313|EMBL:KRH69065.1, ECO:0000313|EnsemblPlants:GLYMA02G00400.1};	--	--	PF04720.12:PDDEXK-like family of unknown function
Glyma.03G163500	5	Chr03	37817334	37825738	--	--	glycinin G1 precursor [Glycine max]	RecName: Full=Glycinin G1; Contains: RecName: Full=Glycinin A1a subunit; Contains: RecName: Full=Glycinin Bx subunit; Flags: Precursor;	SubName: Full=Uncharacterized protein {ECO:0000313|EMBL:KRH67386.1};	--	GO:0045735,nutrient reservoir activity	PF00190.22:Cupin
Glyma.02G002800	8	Chr02	324585	327438	K02936 large subunit ribosomal protein L7Ae | (RefSeq) 60S ribosomal protein L7a-1 (A)	ko03010: Ribosome	uncharacterized protein LOC100797399 [Glycine max]	RecName: Full=60S ribosomal protein L7a-2;	SubName: Full=Uncharacterized protein {ECO:0000313|EMBL:ACU19332.1, ECO:0000313|EnsemblPlants:GLYMA10G00890.1};	60S ribosomal protein L7A	GO:0005840,ribosome; GO:0042254,ribosome biogenesis	PF01248.26:Ribosomal protein L7Ae/L30e/S12e/Gadd45 family
Glyma.02G002900	2	Chr02	328486	334898	K23872 putative homogalacturonan methyltransferase [EC:2.1.1.-] | (RefSeq) hypothetical protein (A)	--	PREDICTED: probable methyltransferase PMT3 [Glycine max]	RecName: Full=Probable methyltransferase PMT8; EC=2.1.1.-;	SubName: Full=Putative methyltransferase PMT8 {ECO:0000313|EMBL:KHN15383.1};	--	GO:0005737,cytoplasm; GO:0005768,endosome; GO:0005794,Golgi apparatus; GO:0000139,Golgi membrane; GO:0016021,integral component of membrane; GO:0005802,trans-Golgi network; GO:0005774,vacuolar membrane; GO:0008757,S-adenosylmethionine-dependent methyltransferase activity; GO:0032259,methylation	PF03141.16:Putative S-adenosyl-L-methionine-dependent methyltransferase
Glyma.02G003400	10	Chr02	391370	399111	K14638 solute carrier family 15 (peptide/histidine transporter), member 3/4 | (RefSeq) protein NRT1/ PTR FAMILY 5.2-like (A)	--	PREDICTED: protein NRT1/ PTR FAMILY 5.2-like [Glycine max]	RecName: Full=Protein NRT1/ PTR FAMILY 5.2; Short=AtNPF5.2; AltName: Full=Peptide transporter PTR3-A; Short=AtPTR3;	SubName: Full=Uncharacterized protein {ECO:0000313|EMBL:KRH69091.1, ECO:0000313|EnsemblPlants:GLYMA02G00600.1};	H+/oligopeptide symporter	GO:0016021,integral component of membrane; GO:0042936,NA; GO:0022857,transmembrane transporter activity; GO:0042937,tripeptide transmembrane transporter activity; GO:0042742,defense response to bacterium; GO:0042938,dipeptide transport; GO:0042538,hyperosmotic salinity response; GO:0009737,response to abscisic acid; GO:0080052,response to histidine; GO:0009753,response to jasmonic acid; GO:004320…	PF00854.21:POT family
Glyma.02G003800	7	Chr02	446694	450693	--	--	PREDICTED: uncharacterized protein LOC100785231 [Glycine max]	RecName: Full=KIN14B-interacting protein At4g14310;	SubName: Full=Uncharacterized protein {ECO:0000313|EMBL:KRH69099.1, ECO:0000313|EnsemblPlants:GLYMA02G00650.1};	--	GO:0005618,cell wall; GO:0005737,cytoplasm; GO:0007049,cell cycle; GO:0051301,cell division	--
Glyma.02G004100	8	Chr02	466891	468969	K02875 large subunit ribosomal protein L14e | (RefSeq) probable 60S ribosomal protein L14 (A)	ko03010: Ribosome	PREDICTED: probable 60S ribosomal protein L14 [Glycine max]	RecName: Full=Probable 60S ribosomal protein L14; AltName: Full=Hydroxyproline-rich glycoprotein HRGP1;	SubName: Full=Uncharacterized protein {ECO:0000313|EMBL:KRH69103.1, ECO:0000313|EnsemblPlants:GLYMA02G00680.2};	60S ribosomal protein L14	GO:0005840,ribosome; GO:0003735,structural constituent of ribosome; GO:0006412,translation	PF01929.17:Ribosomal protein L14
Glyma.02G004800	8	Chr02	520072	524673	--	--	PREDICTED: uncharacterized protein LOC100802013 [Glycine max]	--	SubName: Full=Uncharacterized protein {ECO:0000313|EMBL:KRH69111.1, ECO:0000313|EnsemblPlants:GLYMA02G00730.1};	--	--	--
Glyma.03G163600	5	Chr03	37829740	37832401	K13141 integrator complex subunit 4 | (RefSeq) protein SIEL-like (A)	--	PREDICTED: TOM1-like protein 2 [Glycine max]	RecName: Full=TOM1-like protein 2 {ECO:0000305};	SubName: Full=Uncharacterized protein {ECO:0000313|EMBL:KRH67387.1};	Cytosolic sorting protein GGA2/TOM1	GO:0005737,cytoplasm; GO:0016020,membrane; GO:0043130,ubiquitin binding; GO:0006886,intracellular protein transport	PF00790.19:VHS domain
Glyma.02G006000	10	Chr02	653250	659153	K06269 serine/threonine-protein phosphatase PP1 catalytic subunit [EC:3.1.3.16] | (RefSeq) serine/threonine-protein phosphatase PP1-like (A)	ko03015: mRNA surveillance pathway	PREDICTED: serine/threonine-protein phosphatase PP1-like [Glycine max]	RecName: Full=Serine/threonine-protein phosphatase PP1; EC=3.1.3.16;	RecName: Full=Serine/threonine-protein phosphatase {ECO:0000256|RuleBase:RU004273}; EC=3.1.3.16 {ECO:0000256|RuleBase:RU004273};	Serine/threonine specific protein phosphatase PP1, catalytic subunit	GO:0005634,nucleus; GO:0046872,metal ion binding; GO:0004722,protein serine/threonine phosphatase activity; GO:0006468,protein phosphorylation; GO:0010161,red light signaling pathway	PF00149.28:Calcineurin-like phosphoesterase
Glyma.02G006100	2	Chr02	662133	662807	--	--	hypothetical protein GLYMA_02G006100 [Glycine max]	--	SubName: Full=Uncharacterized protein {ECO:0000313|EMBL:KRH69129.1, ECO:0000313|EnsemblPlants:GLYMA02G00860.1};	--	--	PF03824.16:High-affinity nickel-transport protein
Glyma.03G167800	5	Chr03	38202353	38210883	K05666 ATP-binding cassette, subfamily C (CFTR/MRP), member 2 | (RefSeq) ABC transporter C family member 3-like (A)	ko02010: ABC transporters	PREDICTED: ABC transporter C family member 5-like [Glycine max]	RecName: Full=ABC transporter C family member 5; Short=ABC transporter ABCC.5; Short=AtABCC5; EC=3.6.3.44; AltName: Full=ATP-energized glutathione S-conjugate pump 5; AltName: Full=Glutathione S-conjugate-transporting ATPase 5; AltName: Full=Multidrug resistance-associated protein 5;	SubName: Full=Uncharacterized protein {ECO:0000313|EMBL:KRH67468.1, ECO:0000313|EnsemblPlants:GLYMA03G32500.1};	Multidrug resistance-associated protein/mitoxantrone resistance protein, ABC superfamily	GO:0016021,integral component of membrane; GO:0000325,plant-type vacuole; GO:0005774,vacuolar membrane; GO:0005773,vacuole; GO:0005524,ATP binding; GO:0042626,ATPase activity, coupled to transmembrane movement of substances; GO:0008281,sulfonylurea receptor activity; GO:0008559,xenobiotic transmembrane transporting ATPase activity; GO:1901527,abscisic acid-activated signaling pathway involved in …	PF00664.23:ABC transporter transmembrane region
Glyma.02G008100	1	Chr02	831897	834433	--	--	PREDICTED: uncharacterized protein LOC100803234 [Glycine max]	--	SubName: Full=Uncharacterized protein {ECO:0000313|EMBL:KRH69153.1, ECO:0000313|EnsemblPlants:GLYMA02G01110.2};	--	--	--
Glyma.03G174500	5	Chr03	38826757	38833747	K01184 polygalacturonase [EC:3.2.1.15] | (RefSeq) polygalacturonase (A)	ko00040: Pentose and glucuronate interconversions	PREDICTED: ankyrin repeat-containing protein At5g02620-like isoform X1 [Glycine max]	RecName: Full=Ankyrin repeat-containing protein At5g02620;	SubName: Full=Uncharacterized protein {ECO:0000313|EMBL:KRH67582.1, ECO:0000313|EnsemblPlants:GLYMA03G33180.1};	FOG: Ankyrin repeat	GO:0005783,endoplasmic reticulum; GO:0016021,integral component of membrane; GO:0005886,plasma membrane	PF12796.7:Ankyrin repeats (3 copies)
Glyma.03G179800	5	Chr03	39203079	39208383	K09523 DnaJ homolog subfamily C member 3 | (RefSeq) dnaJ protein P58IPK homolog (A)	ko04141: Protein processing in endoplasmic reticulum	PREDICTED: dnaJ protein P58IPK homolog [Glycine max]	RecName: Full=DnaJ protein P58IPK homolog; Short=AtP58IPK; AltName: Full=Chaperone protein dnaJ 36; Short=AtDjA36; Short=AtJ36; Flags: Precursor;	SubName: Full=Uncharacterized protein {ECO:0000313|EMBL:KRH67674.1, ECO:0000313|EnsemblPlants:GLYMA03G33710.1};	Molecular chaperone (DnaJ superfamily)	GO:0005783,endoplasmic reticulum; GO:0005788,endoplasmic reticulum lumen; GO:0005886,plasma membrane; GO:0044794,positive regulation by host of viral process; GO:0016032,viral process	PF00226.31:DnaJ domain
Glyma.02G009500	2	Chr02	932321	933067	--	--	putative NIM1-interacting family protein [Glycine max]	--	SubName: Full=Uncharacterized protein {ECO:0000313|EMBL:ACU14847.1, ECO:0000313|EnsemblPlants:GLYMA02G01250.1};	--	GO:0010112,regulation of systemic acquired resistance	PF15699.5:NPR1 interacting
Glyma.02G010200	9	Chr02	979354	981094	K11324 DNA methyltransferase 1-associated protein 1 | (RefSeq) SWR1-complex protein 4 (A)	--	PREDICTED: uncharacterized protein LOC100306404 [Glycine max]	--	SubName: Full=Uncharacterized protein {ECO:0000313|EMBL:KRH69182.1, ECO:0000313|EnsemblPlants:GLYMA02G01350.1};	--	GO:0016021,integral component of membrane	PF07281.12:Insulin-induced protein (INSIG)
Glyma.02G010300	10	Chr02	986605	994410	K01897 long-chain acyl-CoA synthetase [EC:6.2.1.3] | (RefSeq) long chain acyl-CoA synthetase 1-like (A)	ko00061: Fatty acid biosynthesis; ko00071: Fatty acid degradation; ko01212: Fatty acid metabolism; ko04146: Peroxisome	PREDICTED: long chain acyl-CoA synthetase 1-like [Glycine max]	RecName: Full=Long chain acyl-CoA synthetase 1; EC=6.2.1.3; AltName: Full=Protein ECERIFERUM 8;	SubName: Full=Uncharacterized protein {ECO:0000313|EMBL:KRH69184.1, ECO:0000313|EnsemblPlants:GLYMA02G01370.3};	Long-chain acyl-CoA synthetases (AMP-forming)	GO:0005783,endoplasmic reticulum; GO:0005524,ATP binding; GO:0102391,decanoate-CoA ligase activity; GO:0004467,long-chain fatty acid-CoA ligase activity; GO:0031957,very long-chain fatty acid-CoA ligase activity; GO:0010143,cutin biosynthetic process; GO:0006631,fatty acid metabolic process; GO:0010025,wax biosynthetic process	PF00501.28:AMP-binding enzyme
Glyma.02G010600	10	Chr02	1006942	1009796	K13508 glycerol-3-phosphate acyltransferase [EC:2.3.1.15 2.3.1.198] | (RefSeq) probable glycerol-3-phosphate acyltransferase 3 (A)	ko00561: Glycerolipid metabolism; ko00564: Glycerophospholipid metabolism	PREDICTED: probable glycerol-3-phosphate acyltransferase 3 [Glycine max]	RecName: Full=Probable glycerol-3-phosphate acyltransferase 3; Short=AtGPAT3; EC=2.3.1.15;	SubName: Full=Putative glycerol-3-phosphate acyltransferase 3 {ECO:0000313|EMBL:KHN08622.1}; EC=2.3.1.15 {ECO:0000313|EMBL:KHN08622.1};	--	GO:0016021,integral component of membrane; GO:0016020,membrane; GO:0090447,glycerol-3-phosphate 2-O-acyltransferase activity; GO:0004366,glycerol-3-phosphate O-acyltransferase activity; GO:0016791,phosphatase activity; GO:0102420,sn-1-glycerol-3-phosphate C16:0-DCA-CoA acyl transferase activity; GO:0016024,CDP-diacylglycerol biosynthetic process; GO:0010143,cutin biosynthetic process; GO:0016311,…	PF01553.21:Acyltransferase
Glyma.02G010900	9	Chr02	1024235	1026549	K12835 ATP-dependent RNA helicase DDX42 [EC:3.6.4.13] | (RefSeq) DEAD-box ATP-dependent RNA helicase 24 isoform X1 (A)	ko03040: Spliceosome	Putative WRKY transcription factor 23 [Glycine soja]	RecName: Full=Probable WRKY transcription factor 23; AltName: Full=WRKY DNA-binding protein 23;	SubName: Full=Putative WRKY transcription factor 23 {ECO:0000313|EMBL:KHN08624.1};	--	GO:0005634,nucleus; GO:0003700,DNA-binding transcription factor activity; GO:0043565,sequence-specific DNA binding; GO:0009733,response to auxin; GO:0009624,response to nematode; GO:0006351,transcription, DNA-templated	PF03106.15:WRKY DNA -binding domain
Glyma.03G180900	5	Chr03	39267448	39269246	K09872 aquaporin PIP | (RefSeq) aquaporin PIP2-7-like (A)	--	PREDICTED: aquaporin PIP2-7-like [Glycine max]	RecName: Full=Aquaporin PIP2-7; AltName: Full=Plasma membrane intrinsic protein 2-7; AltName: Full=ZmPIP2-7; AltName: Full=ZmPIP2;7;	SubName: Full=Uncharacterized protein {ECO:0000313|EMBL:KRH67688.1};	Aquaporin (major intrinsic protein family)	GO:0016021,integral component of membrane; GO:0005886,plasma membrane; GO:0015250,water channel activity	PF00230.20:Major intrinsic protein
Glyma.02G011900	3	Chr02	1090795	1092208	--	--	PREDICTED: uncharacterized protein LOC100794387 [Glycine max]	--	SubName: Full=Uncharacterized protein {ECO:0000313|EMBL:KRH69212.1, ECO:0000313|EnsemblPlants:GLYMA02G01520.1};	--	GO:0016021,integral component of membrane	--
Glyma.02G012100	12	Chr02	1100825	1110153	K11430 histone-lysine N-methyltransferase EZH2 [EC:2.1.1.43] | (RefSeq) histone-lysine N-methyltransferase EZA1 (A)	ko00310: Lysine degradation	PREDICTED: histone-lysine N-methyltransferase EZA1-like isoform X2 [Glycine max]	RecName: Full=Histone-lysine N-methyltransferase EZA1; EC=2.1.1.43; AltName: Full=CURLY LEAF-like 1; AltName: Full=Protein SET DOMAIN GROUP 10; AltName: Full=Protein SWINGER;	RecName: Full=Histone-lysine N-methyltransferase {ECO:0000256|PROSITE-ProRule:PRU00909}; EC=2.1.1.43 {ECO:0000256|PROSITE-ProRule:PRU00909};	Transcriptional repressor EZH1	GO:0005677,chromatin silencing complex; GO:0005634,nucleus; GO:0031519,PcG protein complex; GO:0009506,plasmodesma; GO:0003700,DNA-binding transcription factor activity; GO:0018024,histone-lysine N-methyltransferase activity; GO:0003727,single-stranded RNA binding; GO:0006349,regulation of gene expression by genetic imprinting; GO:0006351,transcription, DNA-templated	PF00856.28:SET domain
Glyma.02G012300	8	Chr02	1112828	1115953	--	--	PREDICTED: uncharacterized protein LOC100805536 [Glycine max]	--	SubName: Full=Uncharacterized protein {ECO:0000313|EMBL:KHN08635.1};	--	--	PF08450.12:SMP-30/Gluconolactonase/LRE-like region
Glyma.02G012500	3	Chr02	1121629	1122359	K05298 glyceraldehyde-3-phosphate dehydrogenase (NADP+) (phosphorylating) [EC:1.2.1.13] | (RAP-DB) Os03g0129300; Similar to Glyceraldehyde-3-phosphate dehydrogenase (EC 1.2.1.13) (Fragment). (A)	ko00710: Carbon fixation in photosynthetic organisms; ko01200: Carbon metabolism	PREDICTED: calvin cycle protein CP12-1, chloroplastic [Glycine max]	RecName: Full=Calvin cycle protein CP12-2, chloroplastic; AltName: Full=CP12 domain-containing protein 2; AltName: Full=Chloroplast protein 12-2; Flags: Precursor;	SubName: Full=Calvin cycle protein CP12 {ECO:0000313|EMBL:KHN08637.1};	--	GO:0009507,chloroplast; GO:0009570,chloroplast stroma; GO:0043234,NA; GO:0099080,supramolecular complex; GO:0005507,copper ion binding; GO:0019899,enzyme binding; GO:0016151,nickel cation binding; GO:0030674,protein binding, bridging; GO:0032403,NA; GO:0071454,cellular response to anoxia; GO:0070417,cellular response to cold; GO:0034605,cellular response to heat; GO:0080153,negative regulation of…	PF02672.15:CP12 domain
Glyma.02G012600	3	Chr02	1123507	1125658	K11303 histone acetyltransferase 1 [EC:2.3.1.48] | (RefSeq) histone acetyltransferase type B catalytic subunit-like (A)	--	lectin precursor [Glycine max]	RecName: Full=Lectin; AltName: Full=Agglutinin; AltName: Full=SBA; Flags: Precursor;	SubName: Full=Uncharacterized protein {ECO:0000313|EMBL:KRH69220.1};	--	GO:0030246,carbohydrate binding	PF00139.19:Legume lectin domain
Glyma.03G189200	5	Chr03	40016174	40017603	--	--	35 kDa seed maturation protein [Glycine max]	RecName: Full=Late embryogenesis abundant protein ECP63 {ECO:0000305}; AltName: Full=Embryonic cell protein 63 {ECO:0000305}; Short=AtECP63 {ECO:0000303|PubMed:9016956}; AltName: Full=LEA domain-containing protein ECP63 {ECO:0000305};	SubName: Full=35 kDa seed maturation protein {ECO:0000313|EMBL:AAD01431.1};	--	GO:0005829,cytosol	PF02987.16:Late embryogenesis abundant protein
Glyma.02G013400	7	Chr02	1213614	1217771	--	--	hypothetical protein GLYMA_02G013400 [Glycine max]	--	SubName: Full=Uncharacterized protein {ECO:0000313|EMBL:KRH69230.1};	--	--	--
Glyma.02G014200	6	Chr02	1283257	1291016	K01937 CTP synthase [EC:6.3.4.2] | (RefSeq) CTP synthase-like isoform X1 (A)	ko00240: Pyrimidine metabolism	PREDICTED: CTP synthase-like isoform X1 [Glycine max]	--	RecName: Full=CTP synthase {ECO:0000256|RuleBase:RU810713}; EC=6.3.4.2 {ECO:0000256|RuleBase:RU810713}; AltName: Full=UTP--ammonia ligase {ECO:0000256|RuleBase:RU810713};	CTP synthase (UTP-ammonia lyase)	GO:0005524,ATP binding; GO:0003883,CTP synthase activity; GO:0044210,'de novo' CTP biosynthetic process; GO:0006541,glutamine metabolic process	PF06418.14:CTP synthase N-terminus
Glyma.02G014800	4	Chr02	1311519	1314998	K23977 L-glutamine---4-(methylsulfanyl)-2-oxobutanoate aminotransferase [EC:2.6.1.117] | (RefSeq) kynurenine--oxoglutarate transaminase-like (A)	ko00270: Cysteine and methionine metabolism	PREDICTED: probable N-succinyldiaminopimelate aminotransferase DapC [Glycine max]	RecName: Full=Bifunctional aspartate aminotransferase and glutamate/aspartate-prephenate aminotransferase; Short=AtAAT; Short=AtPPA-AT; EC=2.6.1.1; EC=2.6.1.78; EC=2.6.1.79; AltName: Full=Protein MATERNAL EFFECT EMBRYO ARREST 17; Flags: Precursor;	SubName: Full=Kynurenine--oxoglutarate transaminase 1 {ECO:0000313|EMBL:KHN08658.1}; EC=2.6.1.7 {ECO:0000313|EMBL:KHN08658.1}; EC=4.4.1.13 {ECO:0000313|EMBL:KHN08658.1};	Kynurenine aminotransferase, glutamine transaminase K	GO:0009507,chloroplast; GO:0009570,chloroplast stroma; GO:0033853,aspartate-prephenate aminotransferase activity; GO:0033854,glutamate-prephenate aminotransferase activity; GO:0004069,L-aspartate:2-oxoglutarate aminotransferase activity; GO:0080130,L-phenylalanine:2-oxoglutarate aminotransferase activity; GO:0030170,pyridoxal phosphate binding; GO:0009095,aromatic amino acid family biosynthetic p…	PF00155.21:Aminotransferase class I and II
Glyma.02G014900	4	Chr02	1318792	1319600	--	--	hypothetical protein GLYMA_02G014900 [Glycine max]	--	SubName: Full=Uncharacterized protein {ECO:0000313|EMBL:KRH69255.1};	--	GO:0016021,integral component of membrane	--
Glyma.02G015100	7	Chr02	1326595	1327756	K11275 histone H1/5 | (RefSeq) histone H1-like (A)	--	Histone H1 [Glycine soja]	RecName: Full=Histone H1;	SubName: Full=Histone H1 {ECO:0000313|EMBL:KHN08659.1};	--	GO:0000786,nucleosome; GO:0005634,nucleus; GO:0003677,DNA binding; GO:0006334,nucleosome assembly	PF00538.19:linker histone H1 and H5 family
Glyma.02G015200	10	Chr02	1333208	1334205	--	--	PREDICTED: uncharacterized protein LOC100798623 [Glycine max]	--	SubName: Full=Uncharacterized protein {ECO:0000313|EMBL:KRH69259.1, ECO:0000313|EnsemblPlants:GLYMA02G01870.1};	--	--	--
Glyma.03G189600	5	Chr03	40045932	40048046	--	--	hypothetical protein glysoja_021468, partial [Glycine soja]	--	SubName: Full=Uncharacterized protein {ECO:0000313|EMBL:ACU21542.1};	--	--	PF13837.6:Myb/SANT-like DNA-binding domain
Glyma.02G015600	10	Chr02	1395956	1400025	K01184 polygalacturonase [EC:3.2.1.15] | (RefSeq) polygalacturonase (A)	ko00040: Pentose and glucuronate interconversions	PREDICTED: probable polygalacturonase [Glycine max]	RecName: Full=Probable polygalacturonase; Short=PG {ECO:0000250|UniProtKB:Q7M1E7}; EC=3.2.1.15; AltName: Full=Pectinase {ECO:0000250|UniProtKB:Q7M1E7};	SubName: Full=Uncharacterized protein {ECO:0000313|EMBL:KRH69264.1};	--	GO:0016021,integral component of membrane; GO:0004650,polygalacturonase activity; GO:0005975,carbohydrate metabolic process	PF00295.17:Glycosyl hydrolases family 28
Glyma.03G190100	5	Chr03	40086278	40087033	--	--	PREDICTED: uncharacterized protein LOC100785774 [Glycine max]	--	SubName: Full=Uncharacterized protein {ECO:0000313|EMBL:KRH67831.1, ECO:0000313|EnsemblPlants:GLYMA03G34780.2};	--	--	--
Glyma.02G015800	10	Chr02	1423523	1432617	K01679 fumarate hydratase, class II [EC:4.2.1.2] | (RefSeq) fumarate hydratase 1, mitochondrial (A)	ko00020: Citrate cycle (TCA cycle); ko00620: Pyruvate metabolism; ko01200: Carbon metabolism	PREDICTED: fumarate hydratase 1, mitochondrial [Glycine max]	RecName: Full=Fumarate hydratase 2, chloroplastic; Short=Fumarase 2; EC=4.2.1.2; Flags: Precursor;	SubName: Full=Uncharacterized protein {ECO:0000313|EMBL:KRH69267.1, ECO:0000313|EnsemblPlants:GLYMA02G01930.1};	Fumarase	GO:0009507,chloroplast; GO:0005829,cytosol; GO:0005739,mitochondrion; GO:0045239,tricarboxylic acid cycle enzyme complex; GO:0004333,fumarate hydratase activity; GO:0009631,cold acclimation; GO:0006106,fumarate metabolic process; GO:0006108,malate metabolic process; GO:0042128,nitrate assimilation; GO:0010109,regulation of photosynthesis; GO:0009651,response to salt stress; GO:0006099,tricarboxyl…	PF00206.20:Lyase
Glyma.02G016100	12	Chr02	1443606	1445191	K09286 EREBP-like factor | (RefSeq) ethylene-responsive transcription factor ERF073-like (A)	--	uncharacterized protein LOC100819416 [Glycine max]	RecName: Full=Ethylene-responsive transcription factor RAP2-3; AltName: Full=Cadmium-induced protein AS30; AltName: Full=Ethylene response factor 72; Short=ERF72; AltName: Full=Ethylene-responsive element binding protein; Short=AtEBP; AltName: Full=Protein RELATED TO APETALA2 3; Short=Related to AP2 3;	SubName: Full=ERF protein {ECO:0000313|EMBL:ADJ57587.1};	--	GO:0005737,cytoplasm; GO:0005634,nucleus; GO:0005886,plasma membrane; GO:0003677,DNA binding; GO:0003700,DNA-binding transcription factor activity; GO:0043565,sequence-specific DNA binding; GO:0008219,cell death; GO:0009873,ethylene-activated signaling pathway; GO:0010286,heat acclimation; GO:0045893,positive regulation of transcription, DNA-templated; GO:0009735,response to cytokinin; GO:0009723…	PF00847.20:AP2 domain
Glyma.02G016400	10	Chr02	1466563	1469437	K01179 endoglucanase [EC:3.2.1.4] | (RefSeq) endoglucanase 17-like (A)	ko00500: Starch and sucrose metabolism	alpha family endo-beta-1,4-glucanase precursor [Glycine max]	RecName: Full=Endoglucanase 17; EC=3.2.1.4; AltName: Full=Endo-1,4-beta glucanase 17; Flags: Precursor;	RecName: Full=Endoglucanase {ECO:0000256|RuleBase:RU361166}; EC=3.2.1.4 {ECO:0000256|RuleBase:RU361166};	--	GO:0005576,extracellular region; GO:0008810,cellulase activity; GO:0071555,cell wall organization; GO:0030245,cellulose catabolic process	PF00759.19:Glycosyl hydrolase family 9
Glyma.02G016500	2	Chr02	1478070	1483258	K01051 pectinesterase [EC:3.1.1.11] | (RefSeq) pectinesterase-like (A)	ko00040: Pentose and glucuronate interconversions	PREDICTED: pectinesterase-like [Glycine max]	RecName: Full=Probable pectinesterase/pectinesterase inhibitor 40; Includes: RecName: Full=Pectinesterase inhibitor 40; AltName: Full=Pectin methylesterase inhibitor 40; Includes: RecName: Full=Pectinesterase 40; Short=PE 40; EC=3.1.1.11; AltName: Full=Pectin methylesterase 40; Short=AtPME40; Flags: Precursor;	RecName: Full=Pectinesterase {ECO:0000256|RuleBase:RU000589}; EC=3.1.1.11 {ECO:0000256|RuleBase:RU000589};	--	GO:0071944,cell periphery; GO:0005618,cell wall; GO:0005576,extracellular region; GO:0045330,aspartyl esterase activity; GO:0030599,pectinesterase activity; GO:0046910,pectinesterase inhibitor activity; GO:0042545,cell wall modification; GO:0045490,pectin catabolic process	PF01095.19:Pectinesterase
Glyma.02G016600	2	Chr02	1487313	1490015	K01051 pectinesterase [EC:3.1.1.11] | (RefSeq) probable pectinesterase/pectinesterase inhibitor 41 (A)	ko00040: Pentose and glucuronate interconversions	PREDICTED: probable pectinesterase/pectinesterase inhibitor 41 [Glycine max]	RecName: Full=Probable pectinesterase/pectinesterase inhibitor 41; Includes: RecName: Full=Pectinesterase inhibitor 41; AltName: Full=Pectin methylesterase inhibitor 41; Includes: RecName: Full=Pectinesterase 41; Short=PE 41; EC=3.1.1.11; AltName: Full=AtPMEpcrB; AltName: Full=Pectin methylesterase 41; Short=AtPME41; Flags: Precursor;	RecName: Full=Pectinesterase {ECO:0000256|RuleBase:RU000589}; EC=3.1.1.11 {ECO:0000256|RuleBase:RU000589};	--	GO:0071944,cell periphery; GO:0005618,cell wall; GO:0005576,extracellular region; GO:0045330,aspartyl esterase activity; GO:0030599,pectinesterase activity; GO:0046910,pectinesterase inhibitor activity; GO:0042545,cell wall modification; GO:0045490,pectin catabolic process; GO:0009741,response to brassinosteroid; GO:0009409,response to cold; GO:0009620,response to fungus	PF01095.19:Pectinesterase
Glyma.03G194900	5	Chr03	40534754	40536182	K14432 ABA responsive element binding factor | (RefSeq) protein ABSCISIC ACID-INSENSITIVE 5-like (A)	ko04075: Plant hormone signal transduction	hypothetical protein GLYMA_03G194900 [Glycine max]	--	SubName: Full=Uncharacterized protein {ECO:0000313|EMBL:KRH67907.1};	--	--	--
Glyma.02G018000	10	Chr02	1574689	1578721	K08678 UDP-glucuronate decarboxylase [EC:4.1.1.35] | (RefSeq) UDP-glucuronic acid decarboxylase 2-like (A)	ko00520: Amino sugar and nucleotide sugar metabolism	PREDICTED: UDP-glucuronic acid decarboxylase 2-like [Glycine max]	RecName: Full=UDP-glucuronic acid decarboxylase 2; EC=4.1.1.35; AltName: Full=UDP-XYL synthase 2; AltName: Full=UDP-glucuronate decarboxylase 2; Short=UGD; Short=UXS-2; AltName: Full=dTDP-glucose 4-6-dehydratase homolog D18;	SubName: Full=Uncharacterized protein {ECO:0000313|EnsemblPlants:GLYMA02G02170.1};	dTDP-glucose 4-6-dehydratase/UDP-glucuronic acid decarboxylase	GO:0005768,endosome; GO:0005794,Golgi apparatus; GO:0032580,Golgi cisterna membrane; GO:0000139,Golgi membrane; GO:0016021,integral component of membrane; GO:0016020,membrane; GO:0005886,plasma membrane; GO:0005802,trans-Golgi network; GO:0008460,dTDP-glucose 4,6-dehydratase activity; GO:0070403,NAD+ binding; GO:0048040,UDP-glucuronate decarboxylase activity; GO:0042732,D-xylose metabolic process…	PF16363.5:GDP-mannose 4,6 dehydratase
Glyma.03G213300	5	Chr03	41861902	41863377	K05770 translocator protein | (RefSeq) translocator protein homolog (A)	--	PREDICTED: translocator protein homolog [Glycine max]	RecName: Full=Translocator protein homolog; Short=AtTSPO;	SubName: Full=Translocator protein like {ECO:0000313|EMBL:KHN20410.1};	--	GO:0031969,chloroplast membrane; GO:0005783,endoplasmic reticulum; GO:0005789,endoplasmic reticulum membrane; GO:0005794,Golgi apparatus; GO:0000139,Golgi membrane; GO:0005795,Golgi stack; GO:0016021,integral component of membrane; GO:0016020,membrane; GO:0020037,heme binding; GO:0006778,porphyrin-containing compound metabolic process; GO:0009737,response to abscisic acid; GO:0006970,response to …	PF03073.15:TspO/MBR family
Glyma.02G019100	10	Chr02	1682559	1685705	K09338 homeobox-leucine zipper protein | (RefSeq) homeobox-leucine zipper protein ATHB-13-like isoform X1 (A)	--	hypothetical protein GLYMA_02G019100 [Glycine max]	RecName: Full=Homeobox-leucine zipper protein ATHB-13; AltName: Full=HD-ZIP protein ATHB-13; AltName: Full=Homeodomain transcription factor ATHB-13;	SubName: Full=Uncharacterized protein {ECO:0000313|EMBL:KRH69308.1, ECO:0000313|EnsemblPlants:GLYMA02G02290.1};	Transcription factor HEX, contains HOX and HALZ domains	GO:0005634,nucleus; GO:0003700,DNA-binding transcription factor activity; GO:0043565,sequence-specific DNA binding; GO:0048826,cotyledon morphogenesis; GO:0009965,leaf morphogenesis; GO:0080022,primary root development; GO:0009744,response to sucrose; GO:0006351,transcription, DNA-templated	PF02183.18:Homeobox associated leucine zipper
Glyma.02G019300	6	Chr02	1715837	1723736	K09422 transcription factor MYB, plant | (RefSeq) transcription factor MYB88-like (A)	--	PREDICTED: pre-mRNA-splicing factor CEF1-like [Glycine max]	RecName: Full=Transcription factor MYB88 {ECO:0000303|PubMed:9839469}; AltName: Full=Myb-related protein 88 {ECO:0000303|PubMed:9839469}; Short=AtMYB88 {ECO:0000303|PubMed:9839469};	SubName: Full=Myb-related protein B {ECO:0000313|EMBL:KHN08693.1};	Transcription factor, Myb superfamily	GO:0005634,nucleus; GO:0003700,DNA-binding transcription factor activity; GO:0000981,DNA-binding transcription factor activity, RNA polymerase II-specific; GO:0043565,sequence-specific DNA binding; GO:0001135,RNA polymerase II transcription regulator recruiting activity; GO:0044212,transcription regulatory region DNA binding; GO:0009553,embryo sac development; GO:0010052,guard cell differentiatio…	PF00249.31:Myb-like DNA-binding domain
Glyma.03G224800	5	Chr03	42715025	42716552	K14484 auxin-responsive protein IAA | (RefSeq) auxin-responsive protein IAA20-like (A)	ko04075: Plant hormone signal transduction	PREDICTED: auxin-responsive protein IAA20-like [Glycine max]	RecName: Full=Auxin-responsive protein IAA20; AltName: Full=Indoleacetic acid-induced protein 20;	RecName: Full=Auxin-induced protein {ECO:0000256|RuleBase:RU004549};	--	GO:0005634,nucleus; GO:0003700,DNA-binding transcription factor activity; GO:0009734,auxin-activated signaling pathway; GO:0010588,cotyledon vascular tissue pattern formation; GO:0009630,gravitropism; GO:0009733,response to auxin; GO:0048364,root development; GO:0009647,skotomorphogenesis; GO:0006351,transcription, DNA-templated	PF02309.16:AUX/IAA family
Glyma.02G019600	8	Chr02	1764147	1765917	K22422 protein downstream neighbor of Son | (RefSeq) hypothetical protein (A)	--	Heme-binding protein 2 [Glycine soja]	RecName: Full=Heme-binding-like protein At3g10130, chloroplastic; Flags: Precursor;	SubName: Full=Heme-binding protein 2 {ECO:0000313|EMBL:KHN08696.1};	--	GO:0009507,chloroplast; GO:0009535,chloroplast thylakoid membrane; GO:0010287,plastoglobule	PF04832.12:SOUL heme-binding protein
Glyma.02G020000	4	Chr02	1824031	1827387	K10573 ubiquitin-conjugating enzyme E2 A [EC:2.3.2.23] | (RefSeq) ubiquitin-conjugating enzyme E2 2-like (A)	ko04120: Ubiquitin mediated proteolysis	uncharacterized protein LOC100499775 [Glycine max]	RecName: Full=Ubiquitin-conjugating enzyme E2 2; EC=2.3.2.23; AltName: Full=E2 ubiquitin-conjugating enzyme 2; AltName: Full=Ubiquitin carrier protein 2; AltName: Full=Ubiquitin-conjugating enzyme E2-17 kDa 2; AltName: Full=Ubiquitin-protein ligase 2;	SubName: Full=Ubiquitin-conjugating enzyme E2 2 {ECO:0000313|EMBL:KHN08700.1};	Ubiquitin-protein ligase	GO:0005524,ATP binding; GO:0016740,transferase activity; GO:0016567,protein ubiquitination	PF00179.26:Ubiquitin-conjugating enzyme
Glyma.03G226800	5	Chr03	42889873	42893352	K23809 cytochrome P450 family 72 subfamily A polypeptide 68 | (GenBank) cytochrome P450 family 709 protein (A)	--	hypothetical protein GLYMA_03G226800 [Glycine max]	RecName: Full=Cytochrome P450 CYP72A219; EC=1.14.-.-; AltName: Full=Cytochrome P450 CYP72A129;	SubName: Full=Uncharacterized protein {ECO:0000313|EMBL:KRH68375.1};	Cytochrome P450 CYP4/CYP19/CYP26 subfamilies	GO:0016021,integral component of membrane; GO:0020037,heme binding; GO:0005506,iron ion binding; GO:0004497,monooxygenase activity; GO:0016705,oxidoreductase activity, acting on paired donors, with incorporation or reduction of molecular oxygen	PF00067.22:Cytochrome P450
Glyma.02G021000	8	Chr02	1893083	1894561	--	--	hypothetical protein GLYMA_02G021000 [Glycine max]	RecName: Full=High mobility group B protein 14; AltName: Full=Nucleosome/chromatin assembly factor group D 14;	SubName: Full=Uncharacterized protein {ECO:0000313|EMBL:KRH69351.1};	--	GO:0005634,nucleus; GO:0003677,DNA binding; GO:0003700,DNA-binding transcription factor activity	--
Glyma.02G021200	1	Chr02	1895801	1897655	--	--	PREDICTED: hypersensitive-induced response protein 2-like [Glycine max]	RecName: Full=Hypersensitive-induced response protein 2; Short=AtHIR2;	SubName: Full=Uncharacterized protein {ECO:0000313|EMBL:KRH69353.1};	Prohibitins and stomatins of the PID superfamily	GO:0009507,chloroplast; GO:0005886,plasma membrane; GO:0009506,plasmodesma; GO:0005774,vacuolar membrane; GO:0005773,vacuole; GO:0043424,protein histidine kinase binding	PF01145.25:SPFH domain / Band 7 family
Glyma.02G021400	7	Chr02	1900379	1903175	--	--	PREDICTED: hypersensitive-induced response protein 2 [Glycine max]	RecName: Full=Hypersensitive-induced response protein 1 {ECO:0000303|PubMed:19712067}; Short=OsHIR1 {ECO:0000303|PubMed:19712067};	SubName: Full=Hypersensitive-induced response protein 1 {ECO:0000313|EMBL:KHN08710.1};	Prohibitins and stomatins of the PID superfamily	GO:0005886,plasma membrane	PF01145.25:SPFH domain / Band 7 family
Glyma.02G021500	7	Chr02	1904420	1906855	--	--	PREDICTED: hypersensitive-induced response protein 1-like [Glycine max]	RecName: Full=Hypersensitive-induced response protein 1 {ECO:0000303|PubMed:19712067}; Short=OsHIR1 {ECO:0000303|PubMed:19712067};	SubName: Full=Uncharacterized protein {ECO:0000313|EMBL:KRH69356.1, ECO:0000313|EnsemblPlants:GLYMA02G02550.1};	Prohibitins and stomatins of the PID superfamily	GO:0005886,plasma membrane	PF01145.25:SPFH domain / Band 7 family
Glyma.02G021600	1	Chr02	1913244	1917663	--	--	PREDICTED: uncharacterized protein LOC547714 [Glycine max]	--	SubName: Full=Uncharacterized protein {ECO:0000313|EMBL:KRH69357.1, ECO:0000313|EnsemblPlants:GLYMA02G02560.1};	--	--	PF07063.13:Domain of unknown function (DUF1338)
Glyma.02G022000	9	Chr02	1955799	1957616	K20715 phototropin [EC:2.7.11.1] | (RefSeq) phototropin-2 (A)	--	PREDICTED: protein TWIN LOV 1-like isoform X1 [Glycine max]	RecName: Full=Protein TWIN LOV 1;	SubName: Full=Uncharacterized protein {ECO:0000313|EMBL:KRH69365.1};	--	GO:0005622,intracellular; GO:0000155,phosphorelay sensor kinase activity; GO:0009881,photoreceptor activity; GO:0018298,protein-chromophore linkage	PF13426.7:PAS domain
Glyma.02G022200	8	Chr02	1965488	1972103	K14638 solute carrier family 15 (peptide/histidine transporter), member 3/4 | (RefSeq) protein NRT1/ PTR FAMILY 4.6-like (A)	--	PREDICTED: protein NRT1/ PTR FAMILY 4.6-like [Glycine max]	RecName: Full=Protein NRT1/ PTR FAMILY 4.6; Short=AtNPF4.6; AltName: Full=Nitrate transporter 1.2; AltName: Full=Nitrate transporter NTL1; AltName: Full=Protein ABA-IMPORTING TRANSPORTER 1;	SubName: Full=Nitrate transporter 1.2 {ECO:0000313|EMBL:KHN28721.1};	H+/oligopeptide symporter	GO:0016021,integral component of membrane; GO:0005886,plasma membrane; GO:0090440,abscisic acid transmembrane transporter activity; GO:0015293,symporter activity; GO:0080168,abscisic acid transport; GO:0042128,nitrate assimilation; GO:0010119,regulation of stomatal movement; GO:0009624,response to nematode	PF00854.21:POT family
Glyma.02G022700	2	Chr02	2069841	2074737	K14638 solute carrier family 15 (peptide/histidine transporter), member 3/4 | (RefSeq) protein NRT1/ PTR FAMILY 2.13-like (A)	--	PREDICTED: protein NRT1/ PTR FAMILY 2.13-like [Glycine max]	RecName: Full=Protein NRT1/ PTR FAMILY 2.13; Short=AtNPF2.13; AltName: Full=Nitrate transporter 1.7;	SubName: Full=Uncharacterized protein {ECO:0000313|EMBL:KRH69380.1, ECO:0000313|EnsemblPlants:GLYMA02G02680.1};	H+/oligopeptide symporter	GO:0016021,integral component of membrane; GO:0005886,plasma membrane; GO:0080054,low-affinity nitrate transmembrane transporter activity; GO:0015293,symporter activity; GO:0042128,nitrate assimilation; GO:0015706,nitrate transport	PF00854.21:POT family
Glyma.02G023400	9	Chr02	2119432	2120808	K03671 thioredoxin 1 | (RefSeq) thioredoxin H2-like (A)	--	uncharacterized protein LOC100776312 [Glycine max]	RecName: Full=Thioredoxin H2; Short=AtTrxh2; AltName: Full=Thioredoxin 2; Short=AtTRX2;	RecName: Full=Thioredoxin {ECO:0000256|PIRNR:PIRNR000077};	Thioredoxin	GO:0005829,cytosol; GO:0005739,mitochondrion; GO:0005886,plasma membrane; GO:0016671,oxidoreductase activity, acting on a sulfur group of donors, disulfide as acceptor; GO:0015035,protein disulfide oxidoreductase activity; GO:0047134,protein-disulfide reductase activity; GO:0004791,thioredoxin-disulfide reductase activity; GO:0045454,cell redox homeostasis; GO:0034599,cellular response to oxidati…	PF00085.20:Thioredoxin
Glyma.02G024400	7	Chr02	2171817	2174630	K13430 serine/threonine-protein kinase PBS1 [EC:2.7.11.1] | (RefSeq) serine/threonine-protein kinase CDL1-like (A)	ko04626: Plant-pathogen interaction	PREDICTED: probable serine/threonine-protein kinase At1g18390 [Glycine max]	RecName: Full=LEAF RUST 10 DISEASE-RESISTANCE LOCUS RECEPTOR-LIKE PROTEIN KINASE-like 1.5 {ECO:0000303|PubMed:12805585}; EC=2.7.11.1; AltName: Full=Probable receptor-like serine/threonine-protein kinase LRK10L-1.5 {ECO:0000305}; Flags: Precursor;	SubName: Full=Uncharacterized protein {ECO:0000313|EMBL:KRH69398.1, ECO:0000313|EnsemblPlants:GLYMA02G02841.1};	Serine/threonine protein kinase	GO:0016021,integral component of membrane; GO:0005886,plasma membrane; GO:0005524,ATP binding; GO:0030247,polysaccharide binding; GO:0004674,protein serine/threonine kinase activity; GO:0007166,cell surface receptor signaling pathway	PF00069.25:Protein kinase domain
Glyma.02G025000	8	Chr02	2208388	2213619	K20843 hydroxyproline O-galactosyltransferase 2/3/4/5/6 [EC:2.4.1.-] | (RefSeq) hydroxyproline O-galactosyltransferase GALT6-like (A)	--	PREDICTED: probable beta-1,3-galactosyltransferase 19 [Glycine max]	RecName: Full=Hydroxyproline O-galactosyltransferase GALT6 {ECO:0000303|PubMed:26690932}; EC=2.4.1.- {ECO:0000269|PubMed:26690932}; AltName: Full=Beta-1,3-galactosyltransferase 19 {ECO:0000305};	SubName: Full=Uncharacterized protein {ECO:0000313|EMBL:KRH69406.1, ECO:0000313|EnsemblPlants:GLYMA02G02900.1};	Galactosyltransferases	GO:0009507,chloroplast; GO:0005794,Golgi apparatus; GO:0000139,Golgi membrane; GO:0016021,integral component of membrane; GO:0030246,carbohydrate binding; GO:1990714,hydroxyproline O-galactosyltransferase activity; GO:0010405,arabinogalactan protein metabolic process; GO:0048354,mucilage biosynthetic process involved in seed coat development; GO:1900056,negative regulation of leaf senescence; GO:…	PF00337.22:Galactoside-binding lectin
Glyma.02G025400	10	Chr02	2276510	2280339	K18878 BHLH transcription factor Upa20 | (RefSeq) Upa20; transcription factor bHLH137-like (A)	ko04626: Plant-pathogen interaction	PREDICTED: transcription factor bHLH79-like [Glycine max]	RecName: Full=Transcription factor BHLH094 {ECO:0000305}; AltName: Full=Basic helix-loop-helix protein 94 {ECO:0000303|PubMed:16896230}; Short=OsbHLH094 {ECO:0000303|PubMed:16896230}; AltName: Full=bHLH transcription factor bHLH094 {ECO:0000305};	SubName: Full=Uncharacterized protein {ECO:0000313|EMBL:KRH69414.1, ECO:0000313|EnsemblPlants:GLYMA02G02934.1};	--	GO:0005634,nucleus; GO:0003677,DNA binding; GO:0046983,protein dimerization activity; GO:0006355,regulation of transcription, DNA-templated; GO:0006351,transcription, DNA-templated	PF00010.26:Helix-loop-helix DNA-binding domain
Glyma.03G228900	5	Chr03	43094940	43098758	K01648 ATP citrate (pro-S)-lyase [EC:2.3.3.8] | (RefSeq) ATP-citrate synthase alpha chain protein 2 (A)	ko00020: Citrate cycle (TCA cycle)	hypothetical protein GLYMA_03G228900 [Glycine max]	RecName: Full=ATP-citrate synthase alpha chain protein 2; Short=ATP-citrate synthase A-2; EC=2.3.3.8; AltName: Full=ATP-citrate lyase A-2; AltName: Full=Citrate cleavage enzyme A-2;	SubName: Full=Uncharacterized protein {ECO:0000313|EMBL:KRH68405.1, ECO:0000313|EnsemblPlants:GLYMA03G38810.1};	ATP-citrate lyase	GO:0009346,citrate lyase complex; GO:0005829,cytosol; GO:0005524,ATP binding; GO:0003878,ATP citrate synthase activity; GO:0006085,acetyl-CoA biosynthetic process; GO:0006633,fatty acid biosynthetic process	PF16114.5:ATP citrate lyase citrate-binding
Glyma.02G026600	9	Chr02	2380494	2385944	--	--	PREDICTED: uncharacterized protein LOC100527301 isoform X1 [Glycine max]	RecName: Full=TORTIFOLIA1-like protein 4 {ECO:0000303|PubMed:15324671};	SubName: Full=Uncharacterized protein {ECO:0000313|EMBL:KRH69431.1, ECO:0000313|EnsemblPlants:GLYMA02G03050.2};	--	GO:0005874,microtubule; GO:0008017,microtubule binding	PF02985.22:HEAT repeat
Glyma.02G026800	6	Chr02	2420200	2425620	K00161 pyruvate dehydrogenase E1 component alpha subunit [EC:1.2.4.1] | (RefSeq) pyruvate dehydrogenase E1 component subunit alpha-1, mitochondrial (A)	ko00010: Glycolysis / Gluconeogenesis; ko00020: Citrate cycle (TCA cycle); ko00620: Pyruvate metabolism; ko01200: Carbon metabolism	PREDICTED: pyruvate dehydrogenase E1 component subunit alpha-1, mitochondrial [Glycine max]	RecName: Full=Pyruvate dehydrogenase E1 component subunit alpha, mitochondrial; Short=PDHE1-A; EC=1.2.4.1; Flags: Precursor;	RecName: Full=Pyruvate dehydrogenase E1 component subunit alpha {ECO:0000256|RuleBase:RU361139}; EC=1.2.4.1 {ECO:0000256|RuleBase:RU361139};	Pyruvate dehydrogenase E1, alpha subunit	GO:0005759,mitochondrial matrix; GO:0004739,pyruvate dehydrogenase (acetyl-transferring) activity; GO:0006086,acetyl-CoA biosynthetic process from pyruvate; GO:0006096,glycolytic process	PF00676.20:Dehydrogenase E1 component
Glyma.02G027400	6	Chr02	2467543	2469109	K14492 two-component response regulator ARR-A family | (RefSeq) two-component response regulator ARR5-like (A)	ko04075: Plant hormone signal transduction	PREDICTED: two-component response regulator ARR5-like [Glycine max]	RecName: Full=Two-component response regulator ARR3;	SubName: Full=Uncharacterized protein {ECO:0000313|EMBL:KRH69443.1, ECO:0000313|EnsemblPlants:GLYMA02G03140.1};	GATA-4/5/6 transcription factors	GO:0005737,cytoplasm; GO:0005634,nucleus; GO:0000156,phosphorelay response regulator activity; GO:0007623,circadian rhythm; GO:0009736,cytokinin-activated signaling pathway; GO:0000160,phosphorelay signal transduction system; GO:0010161,red light signaling pathway; GO:0006355,regulation of transcription, DNA-templated; GO:0009735,response to cytokinin; GO:0010114,response to red light; GO:0006351…	PF00072.24:Response regulator receiver domain
Glyma.02G028000	2	Chr02	2511502	2512793	K07761 metalloendoproteinase 5-MMP [EC:3.4.24.-] | (RefSeq) Matrixin family protein (A)	--	hypothetical protein GLYMA_02G028000 [Glycine max]	RecName: Full=Metalloendoproteinase 5-MMP {ECO:0000303|PubMed:10574937}; Short=At5-MMP {ECO:0000303|PubMed:10574937}; EC=3.4.24.- {ECO:0000305}; Flags: Precursor;	SubName: Full=Uncharacterized protein {ECO:0000313|EMBL:KRH69451.1, ECO:0000313|EnsemblPlants:GLYMA02G03210.1};	Gelatinase A and related matrix metalloproteases	GO:0031225,anchored component of membrane; GO:0031012,extracellular matrix; GO:0005886,plasma membrane; GO:0004222,metalloendopeptidase activity; GO:0008270,zinc ion binding	PF00413.24:Matrixin
Glyma.02G028200	4	Chr02	2556665	2558253	K07761 metalloendoproteinase 5-MMP [EC:3.4.24.-] | (RefSeq) Matrixin family protein (A)	--	PREDICTED: metalloendoproteinase 5-MMP-like [Glycine max]	RecName: Full=Metalloendoproteinase 5-MMP {ECO:0000303|PubMed:10574937}; Short=At5-MMP {ECO:0000303|PubMed:10574937}; EC=3.4.24.- {ECO:0000305}; Flags: Precursor;	SubName: Full=Uncharacterized protein {ECO:0000313|EMBL:KRH69453.1, ECO:0000313|EnsemblPlants:GLYMA02G03250.1};	Gelatinase A and related matrix metalloproteases	GO:0031225,anchored component of membrane; GO:0031012,extracellular matrix; GO:0005886,plasma membrane; GO:0004222,metalloendopeptidase activity; GO:0008270,zinc ion binding	PF00413.24:Matrixin
Glyma.02G028400	12	Chr02	2576710	2577524	--	--	unknown [Glycine max]	--	SubName: Full=Uncharacterized protein {ECO:0000313|EMBL:ACU20712.1, ECO:0000313|EnsemblPlants:GLYMA02G03280.1};	--	--	--
Glyma.02G028700	2	Chr02	2604249	2616021	K07761 metalloendoproteinase 5-MMP [EC:3.4.24.-] | (RefSeq) Matrixin family protein (A)	--	PREDICTED: metalloendoproteinase 5-MMP-like [Glycine max]	RecName: Full=Metalloendoproteinase 5-MMP {ECO:0000303|PubMed:10574937}; Short=At5-MMP {ECO:0000303|PubMed:10574937}; EC=3.4.24.- {ECO:0000305}; Flags: Precursor;	SubName: Full=Uncharacterized protein {ECO:0000313|EnsemblPlants:GLYMA02G03301.1};	Gelatinase A and related matrix metalloproteases	GO:0031225,anchored component of membrane; GO:0031012,extracellular matrix; GO:0005886,plasma membrane; GO:0004222,metalloendopeptidase activity; GO:0008270,zinc ion binding	PF00413.24:Matrixin
Glyma.02G029500	3	Chr02	2713193	2713981	--	--	hypothetical protein GLYMA_02G029500 [Glycine max]	--	SubName: Full=Uncharacterized protein {ECO:0000313|EMBL:KRH69468.1, ECO:0000313|EnsemblPlants:GLYMA02G03391.1};	--	--	--
Glyma.02G030200	3	Chr02	2795793	2799516	K18810 cyclin D1/2/4, plant | (RefSeq) cyclin-D1-1-like (A)	--	PREDICTED: cyclin-D1-1-like [Glycine max]	RecName: Full=Cyclin-D1-1; AltName: Full=Cyclin-delta-1; Short=Cyclin-d1; AltName: Full=G1/S-specific cyclin-D1-1; Short=CycD1;1;	SubName: Full=Cyclin-D1-1 {ECO:0000313|EMBL:KHN28667.1};	G1/S-specific cyclin D	GO:0005634,nucleus; GO:0007049,cell cycle; GO:0051301,cell division	PF00134.23:Cyclin, N-terminal domain
Glyma.03G231500	5	Chr03	43295332	43298116	K02836 peptide chain release factor 2 | (RefSeq) peptide chain release factor PrfB2, chloroplastic-like (A)	--	hypothetical protein GLYMA_03G231500 [Glycine max]	RecName: Full=Peptide chain release factor PrfB2, chloroplastic {ECO:0000303|PubMed:21771930}; Short=AtPrfB2 {ECO:0000303|PubMed:21771930}; Flags: Precursor;	SubName: Full=Uncharacterized protein {ECO:0000313|EMBL:KRH68442.1, ECO:0000313|EnsemblPlants:GLYMA03G39081.1};	Mitochondrial polypeptide chain release factor	GO:0009570,chloroplast stroma; GO:0016149,translation release factor activity, codon specific	PF03462.18:PCRF domain
Glyma.02G030800	2	Chr02	2831244	2833073	--	--	PREDICTED: uncharacterized protein LOC100782731 [Glycine max]	--	SubName: Full=Uncharacterized protein {ECO:0000313|EMBL:KHN28664.1};	--	--	PF14009.6:Domain of unknown function (DUF4228)
Glyma.02G031000	6	Chr02	2857959	2862771	K14611 solute carrier family 23 (nucleobase transporter), member 1 | (RefSeq) nucleobase-ascorbate transporter 6 (A)	--	PREDICTED: nucleobase-ascorbate transporter 7-like [Glycine max]	RecName: Full=Nucleobase-ascorbate transporter 7; Short=AtNAT7;	SubName: Full=Nucleobase-ascorbate transporter 7 {ECO:0000313|EMBL:KHN28662.1};	Xanthine/uracil transporters	GO:0016021,integral component of membrane; GO:0005886,plasma membrane; GO:0009506,plasmodesma; GO:0022857,transmembrane transporter activity	PF00860.20:Permease family
Glyma.02G031200	10	Chr02	2890469	2892871	K23877 xyloglucan O-acetyltransferase | (RefSeq) protein ALTERED XYLOGLUCAN 4-like isoform X1 (A)	--	hypothetical protein glysoja_025394 [Glycine soja]	RecName: Full=Protein ALTERED XYLOGLUCAN 4; AltName: Full=Protein trichome birefringence-like 27;	SubName: Full=Uncharacterized protein {ECO:0000313|EMBL:KHN28660.1};	--	GO:0005794,Golgi apparatus; GO:0000139,Golgi membrane; GO:0016021,integral component of membrane; GO:0016413,O-acetyltransferase activity; GO:0010411,xyloglucan metabolic process	PF13839.6:GDSL/SGNH-like Acyl-Esterase family found in Pmr5 and Cas1p
Glyma.02G031300	10	Chr02	2895770	2897915	K23877 xyloglucan O-acetyltransferase | (RefSeq) protein ALTERED XYLOGLUCAN 4-like (A)	--	PREDICTED: protein ALTERED XYLOGLUCAN 4-like [Glycine max]	RecName: Full=Protein ALTERED XYLOGLUCAN 4; AltName: Full=Protein trichome birefringence-like 27;	SubName: Full=Uncharacterized protein {ECO:0000313|EMBL:KHN28659.1};	--	GO:0005794,Golgi apparatus; GO:0000139,Golgi membrane; GO:0016021,integral component of membrane; GO:0016413,O-acetyltransferase activity; GO:0010411,xyloglucan metabolic process	PF13839.6:GDSL/SGNH-like Acyl-Esterase family found in Pmr5 and Cas1p
Glyma.02G031600	10	Chr02	2907379	2909809	K23877 xyloglucan O-acetyltransferase | (RefSeq) protein ALTERED XYLOGLUCAN 4-like isoform X1 (A)	--	PREDICTED: protein ALTERED XYLOGLUCAN 4-like isoform X1 [Glycine max]	RecName: Full=Protein ALTERED XYLOGLUCAN 4; AltName: Full=Protein trichome birefringence-like 27;	SubName: Full=Uncharacterized protein {ECO:0000313|EMBL:KHN28656.1};	--	GO:0005794,Golgi apparatus; GO:0000139,Golgi membrane; GO:0016021,integral component of membrane; GO:0016413,O-acetyltransferase activity; GO:0010411,xyloglucan metabolic process	PF13839.6:GDSL/SGNH-like Acyl-Esterase family found in Pmr5 and Cas1p
Glyma.02G031700	9	Chr02	2913162	2916063	K23877 xyloglucan O-acetyltransferase | (RefSeq) protein ALTERED XYLOGLUCAN 4-like (A)	--	PREDICTED: protein ALTERED XYLOGLUCAN 4-like [Glycine max]	RecName: Full=Protein ALTERED XYLOGLUCAN 4; AltName: Full=Protein trichome birefringence-like 27;	SubName: Full=Uncharacterized protein {ECO:0000313|EMBL:KHN28655.1};	--	GO:0005794,Golgi apparatus; GO:0000139,Golgi membrane; GO:0016021,integral component of membrane; GO:0016413,O-acetyltransferase activity; GO:0010411,xyloglucan metabolic process	PF13839.6:GDSL/SGNH-like Acyl-Esterase family found in Pmr5 and Cas1p
Glyma.02G031800	9	Chr02	2920103	2922213	K23877 xyloglucan O-acetyltransferase | (RefSeq) protein ALTERED XYLOGLUCAN 4-like isoform X1 (A)	--	PREDICTED: protein ALTERED XYLOGLUCAN 4-like isoform X1 [Glycine max]	RecName: Full=Protein ALTERED XYLOGLUCAN 4; AltName: Full=Protein trichome birefringence-like 27;	SubName: Full=Uncharacterized protein {ECO:0000313|EMBL:KRH69504.1, ECO:0000313|EnsemblPlants:GLYMA02G03640.1};	--	GO:0005794,Golgi apparatus; GO:0000139,Golgi membrane; GO:0016021,integral component of membrane; GO:0016413,O-acetyltransferase activity; GO:0010411,xyloglucan metabolic process	PF13839.6:GDSL/SGNH-like Acyl-Esterase family found in Pmr5 and Cas1p
Glyma.02G032200	9	Chr02	2937372	2942616	K13430 serine/threonine-protein kinase PBS1 [EC:2.7.11.1] | (RefSeq) serine/threonine-protein kinase PBS1 (A)	ko04626: Plant-pathogen interaction	PREDICTED: serine/threonine-protein kinase CDL1-like isoform X1 [Glycine max]	RecName: Full=Probable serine/threonine-protein kinase PBL28 {ECO:0000305}; EC=2.7.11.1 {ECO:0000305}; AltName: Full=PBS1-like protein 28 {ECO:0000303|PubMed:20413097};	SubName: Full=Uncharacterized protein {ECO:0000313|EMBL:KRH69509.1, ECO:0000313|EnsemblPlants:GLYMA02G03670.1};	Serine/threonine protein kinase	GO:0005886,plasma membrane; GO:0005524,ATP binding; GO:0004675,transmembrane receptor protein serine/threonine kinase activity; GO:0007166,cell surface receptor signaling pathway; GO:0006952,defense response; GO:0006468,protein phosphorylation	PF00069.25:Protein kinase domain
Glyma.03G231700	5	Chr03	43302392	43304350	--	--	PREDICTED: uncharacterized protein LOC100527623 isoform X1 [Glycine max]	RecName: Full=Universal stress protein A-like protein;	SubName: Full=Uncharacterized protein {ECO:0000313|EMBL:KRH68444.1, ECO:0000313|EnsemblPlants:GLYMA03G39100.2};	--	GO:0005886,plasma membrane; GO:0016208,AMP binding; GO:0006950,response to stress	PF00582.26:Universal stress protein family
Glyma.03G232900	5	Chr03	43380370	43381314	--	--	PREDICTED: GATA transcription factor 16-like [Glycine max]	RecName: Full=GATA transcription factor 16;	SubName: Full=Uncharacterized protein {ECO:0000313|EMBL:KRH68462.1, ECO:0000313|EnsemblPlants:GLYMA03G39220.1};	GATA-4/5/6 transcription factors	GO:0005634,nucleus; GO:0005667,transcription factor complex; GO:0003682,chromatin binding; GO:0003700,DNA-binding transcription factor activity; GO:0000977,RNA polymerase II regulatory region sequence-specific DNA binding; GO:0001085,RNA polymerase II transcription factor binding; GO:0001228,DNA-binding transcription activator activity, RNA polymerase II-specific; GO:0008270,zinc ion binding; GO:…	PF00320.27:GATA zinc finger
Glyma.02G032600	9	Chr02	2983295	2986815	K17500 integrin-linked kinase-associated serine/threonine phosphatase 2C [EC:3.1.3.16] | (RefSeq) WAT1-related protein At3g18200 isoform X1 (A)	--	PREDICTED: WAT1-related protein At3g28050-like [Glycine max]	RecName: Full=WAT1-related protein At3g28050;	RecName: Full=WAT1-related protein {ECO:0000256|RuleBase:RU363077};	--	GO:0016021,integral component of membrane; GO:0005886,plasma membrane; GO:0022857,transmembrane transporter activity	PF00892.20:EamA-like transporter family
Glyma.02G033400	6	Chr02	3085912	3089405	K03549 KUP system potassium uptake protein | (RefSeq) potassium transporter 8-like isoform X1 (A)	--	PREDICTED: uncharacterized protein LOC100797570 [Glycine max]	--	SubName: Full=Uncharacterized protein {ECO:0000313|EMBL:KRH69528.1, ECO:0000313|EnsemblPlants:GLYMA02G03810.1};	--	--	PF01436.21:NHL repeat
Glyma.02G033500	6	Chr02	3098851	3104160	K16055 trehalose 6-phosphate synthase/phosphatase [EC:2.4.1.15 3.1.3.12] | (RefSeq) probable alpha,alpha-trehalose-phosphate synthase [UDP-forming] 9 (A)	ko00500: Starch and sucrose metabolism	PREDICTED: probable alpha,alpha-trehalose-phosphate synthase [UDP-forming]	RecName: Full=Probable alpha,alpha-trehalose-phosphate synthase [UDP-forming] 9; EC=2.4.1.15; AltName: Full=Trehalose-6-phosphate synthase 9; Short=AtTPS9;	SubName: Full=Uncharacterized protein {ECO:0000313|EMBL:KRH69529.1, ECO:0000313|EnsemblPlants:GLYMA02G03820.1};	Trehalose-6-phosphate synthase component TPS1 and related subunits	GO:0005737,cytoplasm; GO:0016791,phosphatase activity; GO:0016757,transferase activity, transferring glycosyl groups; GO:0005992,trehalose biosynthetic process; GO:0070413,trehalose metabolism in response to stress	PF00982.21:Glycosyltransferase family 20
Glyma.02G033600	1	Chr02	3112951	3117829	K03549 KUP system potassium uptake protein | (RefSeq) potassium transporter 6-like (A)	--	hypothetical protein GLYMA_02G033600 [Glycine max]	RecName: Full=Potassium transporter 6; Short=AtHAK6; Short=AtPOT6;	RecName: Full=Potassium transporter {ECO:0000256|RuleBase:RU321113};	--	GO:0016021,integral component of membrane; GO:0005886,plasma membrane; GO:0015079,potassium ion transmembrane transporter activity	PF02705.16:K+ potassium transporter
Glyma.02G033900	8	Chr02	3141921	3145097	K00797 spermidine synthase [EC:2.5.1.16] | (RefSeq) spermidine synthase 1-like (A)	ko00270: Cysteine and methionine metabolism; ko00330: Arginine and proline metabolism; ko00480: Glutathione metabolism	uncharacterized protein LOC100792107 [Glycine max]	RecName: Full=Spermidine synthase 1; Short=SPDSY 1; EC=2.5.1.16; AltName: Full=Putrescine aminopropyltransferase 1;	SubName: Full=Uncharacterized protein {ECO:0000313|EMBL:ACU21202.1, ECO:0000313|EnsemblPlants:GLYMA02G03860.1};	Spermidine synthase	GO:0004766,spermidine synthase activity; GO:0008295,spermidine biosynthetic process	PF01564.17:Spermine/spermidine synthase domain
Glyma.02G034000	6	Chr02	3157712	3162381	K00128 aldehyde dehydrogenase (NAD+) [EC:1.2.1.3] | (RefSeq) aldehyde dehydrogenase family 2 member B7, mitochondrial (A)	ko00010: Glycolysis / Gluconeogenesis; ko00053: Ascorbate and aldarate metabolism; ko00071: Fatty acid degradation; ko00280: Valine, leucine and isoleucine degradation; ko00310: Lysine degradation; ko00330: Arginine and proline metabolism; ko00340: Histidine metabolism; ko00380: Tryptophan metabolism; ko00410: beta-Alanine metabolism; ko00561: Glycerolipid metabolism; ko00620: Pyruvate metabolism…	PREDICTED: aldehyde dehydrogenase family 2 member B7, mitochondrial [Glycine max]	RecName: Full=Aldehyde dehydrogenase family 2 member B7, mitochondrial; Short=ALDH2b; EC=1.2.1.3; Flags: Precursor;	SubName: Full=Uncharacterized protein {ECO:0000313|EMBL:KRH69545.1, ECO:0000313|EnsemblPlants:GLYMA02G03870.1};	Aldehyde dehydrogenase	GO:0005759,mitochondrial matrix; GO:0004029,aldehyde dehydrogenase (NAD) activity	PF00171.22:Aldehyde dehydrogenase family
Glyma.02G034300	3	Chr02	3173217	3179345	K12822 RNA-binding protein 25 | (RefSeq) RNA-binding protein 25-like isoform X1 (A)	ko03040: Spliceosome	PREDICTED: RNA-binding protein 25-like isoform X1 [Glycine max]	--	SubName: Full=Uncharacterized protein {ECO:0000313|EMBL:KRH69548.1};	U1 snRNP complex, subunit SNU71 and related PWI-motif proteins	GO:0003723,RNA binding; GO:0006397,mRNA processing	PF01480.17:PWI domain
Glyma.02G034400	6	Chr02	3181390	3188192	K22544 deoxynucleoside triphosphate triphosphohydrolase SAMHD1 [EC:3.1.5.-] | (RefSeq) deoxynucleoside triphosphate triphosphohydrolase SAMHD1 homolog isoform X1 (A)	--	PREDICTED: deoxynucleoside triphosphate triphosphohydrolase SAMHD1 homolog isoform X1 [Glycine max]	--	SubName: Full=Uncharacterized protein {ECO:0000313|EMBL:KRH69553.1, ECO:0000313|EnsemblPlants:GLYMA02G03920.2};	Metal-dependent phosphohydrolase	GO:0005634,nucleus; GO:0008832,dGTPase activity; GO:0006203,dGTP catabolic process	PF01966.22:HD domain
Glyma.02G034700	10	Chr02	3210806	3213559	K06699 proteasome activator subunit 4 | (RefSeq) hypothetical protein (A)	ko03050: Proteasome	PREDICTED: probable polygalacturonase non-catalytic subunit JP650 [Glycine max]	RecName: Full=Polygalacturonase 1 beta-like protein 3 {ECO:0000303|PubMed:26106400}; Short=AtPGL3 {ECO:0000303|PubMed:26106400}; AltName: Full=Aromatic-rich glycoprotein JP650; AltName: Full=PG1beta-like protein 3 {ECO:0000303|PubMed:26106400}; AltName: Full=Polygalacturonase 2 {ECO:0000303|PubMed:19639386}; AltName: Full=Probable polygalacturonase non-catalytic subunit JP650; Flags: Precursor;	SubName: Full=Uncharacterized protein {ECO:0000313|EMBL:KRH69560.1, ECO:0000313|EnsemblPlants:GLYMA02G03960.1};	--	GO:0048046,apoplast; GO:0005618,cell wall	PF03181.15:BURP domain
Glyma.02G035000	1	Chr02	3243971	3249270	K01673 carbonic anhydrase [EC:4.2.1.1] | (RefSeq) carbonic anhydrase 2-like isoform X1 (A)	ko00910: Nitrogen metabolism	PREDICTED: carbonic anhydrase 2-like isoform X1 [Glycine max]	RecName: Full=Carbonic anhydrase, chloroplastic; EC=4.2.1.1; AltName: Full=Carbonate dehydratase; Flags: Precursor;	RecName: Full=Carbonic anhydrase {ECO:0000256|RuleBase:RU003956}; EC=4.2.1.1 {ECO:0000256|RuleBase:RU003956}; AltName: Full=Carbonate dehydratase {ECO:0000256|RuleBase:RU003956};	Predicted carbonic anhydrase involved in protection against oxidative damage	GO:0009570,chloroplast stroma; GO:0004089,carbonate dehydratase activity; GO:0008270,zinc ion binding; GO:0015976,carbon utilization	PF00484.19:Carbonic anhydrase
Glyma.03G238100	5	Chr03	43766954	43773560	K18577 mannosylglycoprotein endo-beta-mannosidase [EC:3.2.1.152] | (RefSeq) mannosylglycoprotein endo-beta-mannosidase (A)	--	hypothetical protein GLYMA_03G238100 [Glycine max]	RecName: Full=Mannosylglycoprotein endo-beta-mannosidase; Short=Endo-beta-mannosidase; EC=3.2.1.152; Contains: RecName: Full=Mannosylglycoprotein endo-beta-mannosidase 31 kDa subunit; Contains: RecName: Full=Mannosylglycoprotein endo-beta-mannosidase 28 kDa subunit; Contains: RecName: Full=Mannosylglycoprotein endo-beta-mannosidase 42 kDa subunit;	SubName: Full=Uncharacterized protein {ECO:0000313|EMBL:KRH68558.1};	Predicted beta-mannosidase	GO:0033947,mannosylglycoprotein endo-beta-mannosidase activity; GO:0005975,carbohydrate metabolic process	PF00703.21:Glycosyl hydrolases family 2
Glyma.02G036400	9	Chr02	3363316	3365152	--	--	PREDICTED: F-box/kelch-repeat protein At1g23390-like [Glycine max]	RecName: Full=F-box/kelch-repeat protein At1g23390;	SubName: Full=Uncharacterized protein {ECO:0000313|EMBL:KRH69594.1, ECO:0000313|EnsemblPlants:GLYMA02G04130.1};	--	GO:0005829,cytosol; GO:0005634,nucleus; GO:0043161,proteasome-mediated ubiquitin-dependent protein catabolic process	PF13964.6:Kelch motif
Glyma.02G037200	3	Chr02	3453573	3457418	K13416 brassinosteroid insensitive 1-associated receptor kinase 1 [EC:2.7.10.1 2.7.11.1] | (RefSeq) BRASSINOSTEROID INSENSITIVE 1-associated receptor kinase 1-like (A)	ko04016: MAPK signaling pathway - plant; ko04075: Plant hormone signal transduction; ko04626: Plant-pathogen interaction	PREDICTED: cysteine-rich receptor-like protein kinase 3 [Glycine max]	RecName: Full=Cysteine-rich receptor-like protein kinase 3; Short=Cysteine-rich RLK3; EC=2.7.11.-; Flags: Precursor;	SubName: Full=Uncharacterized protein {ECO:0000313|EMBL:KRH69611.1, ECO:0000313|EnsemblPlants:GLYMA02G04220.1};	--	GO:0016021,integral component of membrane; GO:0005886,plasma membrane; GO:0005524,ATP binding; GO:0004674,protein serine/threonine kinase activity	PF00069.25:Protein kinase domain
Glyma.03G239700	5	Chr03	43835476	43838866	K22683 aspartyl protease family protein [EC:3.4.23.-] | (RefSeq) hypothetical protein (A)	--	basic 7S globulin precursor [Glycine max]	RecName: Full=Basic 7S globulin; AltName: Full=SBg7S; Short=Bg; Contains: RecName: Full=Basic 7S globulin high kDa subunit; Contains: RecName: Full=Basic 7S globulin low kDa subunit; Flags: Precursor;	SubName: Full=Uncharacterized protein {ECO:0000313|EMBL:KRH68584.1};	Aspartyl protease	GO:0004190,aspartic-type endopeptidase activity; GO:0042802,identical protein binding; GO:0045735,nutrient reservoir activity; GO:0030163,protein catabolic process; GO:0006508,proteolysis	PF14541.6:Xylanase inhibitor C-terminal
Glyma.02G038000	8	Chr02	3537630	3541983	K20308 trafficking protein particle complex subunit 11 | (RefSeq) trafficking protein particle complex subunit 11 (A)	--	PREDICTED: ribose-phosphate pyrophosphokinase 4-like [Glycine max]	RecName: Full=Ribose-phosphate pyrophosphokinase 3, mitochondrial; EC=2.7.6.1; AltName: Full=Phosphoribosyl pyrophosphate synthase 3; Flags: Precursor;	SubName: Full=Uncharacterized protein {ECO:0000313|EMBL:KRH69621.1, ECO:0000313|EnsemblPlants:GLYMA02G04310.1};	Ribose-phosphate pyrophosphokinase	GO:0005739,mitochondrion; GO:0005524,ATP binding; GO:0016301,kinase activity; GO:0000287,magnesium ion binding; GO:0004749,ribose phosphate diphosphokinase activity; GO:0009116,nucleoside metabolic process; GO:0009165,nucleotide biosynthetic process	PF00156.27:Phosphoribosyl transferase domain
Glyma.03G255000	5	Chr03	45015196	45021659	K09060 plant G-box-binding factor | (RefSeq) common plant regulatory factor 1-like isoform X1 (A)	--	bZIP transcription factor bZIP77 isoform 1 [Glycine max]	RecName: Full=Common plant regulatory factor 1; Short=CPRF-1;	SubName: Full=Uncharacterized protein {ECO:0000313|EMBL:KRH68860.1, ECO:0000313|EnsemblPlants:GLYMA03G41590.6};	--	GO:0005634,nucleus; GO:0003677,DNA binding; GO:0003700,DNA-binding transcription factor activity; GO:0006351,transcription, DNA-templated	PF07777.11:G-box binding protein MFMR
Glyma.03G255100	5	Chr03	45028032	45032878	K01792 glucose-6-phosphate 1-epimerase [EC:5.1.3.15] | (RefSeq) putative glucose-6-phosphate 1-epimerase (A)	ko00010: Glycolysis / Gluconeogenesis	PREDICTED: putative glucose-6-phosphate 1-epimerase isoform X1 [Glycine max]	RecName: Full=Putative glucose-6-phosphate 1-epimerase {ECO:0000250|UniProtKB:Q03161}; EC=5.1.3.15 {ECO:0000250|UniProtKB:Q03161}; AltName: Full=Putative D-hexose-6-phosphate mutarotase {ECO:0000250|UniProtKB:Q03161}; AltName: Full=Putative apospory-associated protein C;	RecName: Full=Glucose-6-phosphate 1-epimerase {ECO:0000256|PIRNR:PIRNR016020}; EC=5.1.3.15 {ECO:0000256|PIRNR:PIRNR016020};	Uncharacterized enzymes related to aldose 1-epimerase	GO:0030246,carbohydrate binding; GO:0047938,glucose-6-phosphate 1-epimerase activity; GO:0005975,carbohydrate metabolic process	PF01263.20:Aldose 1-epimerase
Glyma.02G038700	12	Chr02	3616109	3617272	K02900 large subunit ribosomal protein L27Ae | (RefSeq) 60S ribosomal protein L27a-3-like (A)	ko03010: Ribosome	60S ribosomal protein L27a [Glycine max]	RecName: Full=60S ribosomal protein L27a-3;	SubName: Full=Uncharacterized protein {ECO:0000313|EMBL:KRH69632.1, ECO:0000313|EnsemblPlants:GLYMA02G04400.1};	60s ribosomal protein L15/L27	GO:0005829,cytosol; GO:0022625,cytosolic large ribosomal subunit; GO:0022626,cytosolic ribosome; GO:0016020,membrane; GO:0009506,plasmodesma; GO:0042788,polysomal ribosome; GO:0003723,RNA binding; GO:0003735,structural constituent of ribosome; GO:0002181,cytoplasmic translation	PF00828.19:Ribosomal proteins 50S-L15, 50S-L18e, 60S-L27A
Glyma.02G039400	6	Chr02	3684389	3688023	K03063 26S proteasome regulatory subunit T3 | (RefSeq) 26S protease regulatory subunit 6B homolog (A)	ko03050: Proteasome	PREDICTED: BTB/POZ domain-containing protein At1g67900-like [Glycine max]	RecName: Full=BTB/POZ domain-containing protein At1g67900;	SubName: Full=Uncharacterized protein {ECO:0000313|EMBL:KRH69640.1, ECO:0000313|EnsemblPlants:GLYMA02G04470.1};	--	GO:0016567,protein ubiquitination	PF03000.14:NPH3 family
Glyma.02G039700	2	Chr02	3723625	3724989	--	--	--	--	--	--	--	--
Glyma.02G040100	7	Chr02	3776461	3777774	K15777 4,5-DOPA dioxygenase extradiol [EC:1.13.11.-] | (RefSeq) uncharacterized protein LOC110630336 (A)	ko00965: Betalain biosynthesis	PREDICTED: zinc-finger homeodomain protein 1-like [Glycine max]	RecName: Full=Zinc-finger homeodomain protein 1; Short=OsZHD1;	SubName: Full=Uncharacterized protein {ECO:0000313|EMBL:KRH69650.1, ECO:0000313|EnsemblPlants:GLYMA02G04550.2};	--	GO:0005634,nucleus; GO:0003677,DNA binding; GO:0046872,metal ion binding; GO:0006355,regulation of transcription, DNA-templated; GO:0006351,transcription, DNA-templated	PF04770.12:ZF-HD protein dimerisation region
Glyma.02G040600	8	Chr02	3819970	3821633	K01092 myo-inositol-1(or 4)-monophosphatase [EC:3.1.3.25] | (RefSeq) phosphatase IMPL1, chloroplastic-like isoform X1 (A)	ko00562: Inositol phosphate metabolism; ko04070: Phosphatidylinositol signaling system	uncharacterized protein LOC100305966 [Glycine max]	RecName: Full=Protein CURVATURE THYLAKOID 1D, chloroplastic; Flags: Precursor;	SubName: Full=Uncharacterized protein {ECO:0000313|EMBL:ACU13913.1, ECO:0000313|EnsemblPlants:GLYMA02G04600.1};	--	GO:0009535,chloroplast thylakoid membrane; GO:0016021,integral component of membrane	PF14159.6:CAAD domains of cyanobacterial aminoacyl-tRNA synthetase
Glyma.02G040700	6	Chr02	3830530	3832064	K15104 solute carrier family 25 (mitochondrial oxoglutarate transporter), member 11 | (RefSeq) mitochondrial uncoupling protein 5-like (A)	--	PREDICTED: mitochondrial uncoupling protein 5-like [Glycine max]	RecName: Full=Mitochondrial uncoupling protein 5; Short=AtPUMP5; AltName: Full=Mitochondrial dicarboxylate carrier 1;	SubName: Full=Uncharacterized protein {ECO:0000313|EMBL:KRH69658.1, ECO:0000313|EnsemblPlants:GLYMA02G04620.1};	Mitochondrial oxoglutarate/malate carrier proteins	GO:0016021,integral component of membrane; GO:0005743,mitochondrial inner membrane; GO:0015297,antiporter activity; GO:0005310,dicarboxylic acid transmembrane transporter activity; GO:0015140,malate transmembrane transporter activity; GO:0015131,oxaloacetate transmembrane transporter activity; GO:0017077,oxidative phosphorylation uncoupler activity; GO:0015141,succinate transmembrane transporter …	PF00153.27:Mitochondrial carrier protein
Glyma.02G042100	7	Chr02	3963683	3970248	K00030 isocitrate dehydrogenase (NAD+) [EC:1.1.1.41] | (RefSeq) isocitrate dehydrogenase [NAD] regulatory subunit 1, mitochondrial-like (A)	ko00020: Citrate cycle (TCA cycle); ko01200: Carbon metabolism; ko01210: 2-Oxocarboxylic acid metabolism; ko01230: Biosynthesis of amino acids	PREDICTED: isocitrate dehydrogenase [NAD]	RecName: Full=Isocitrate dehydrogenase [NAD] regulatory subunit 1, mitochondrial; EC=1.1.1.41; AltName: Full=IDH-I; AltName: Full=Isocitric dehydrogenase 1; AltName: Full=NAD(+)-specific ICDH 1; Flags: Precursor;	SubName: Full=Uncharacterized protein {ECO:0000313|EMBL:KRH69685.1, ECO:0000313|EnsemblPlants:GLYMA02G04780.1};	Isocitrate dehydrogenase, gamma subunit	GO:0005739,mitochondrion; GO:0004449,isocitrate dehydrogenase (NAD+) activity; GO:0008270,zinc ion binding; GO:0006102,isocitrate metabolic process; GO:0006099,tricarboxylic acid cycle	PF00180.20:Isocitrate/isopropylmalate dehydrogenase
Glyma.02G042200	1	Chr02	3972516	3976898	K23618 acyl-activating enzyme 11/12 [EC:6.2.1.2 6.2.1.-] | (RefSeq) benzoate--CoA ligase, peroxisomal-like (A)	--	fatty acyl-CoA synthetase domain-containing protein [Glycine max]	RecName: Full=Probable acyl-activating enzyme 2; EC=6.2.1.-; AltName: Full=AMP-binding protein 2; Short=AtAMPBP2;	SubName: Full=Uncharacterized protein {ECO:0000313|EMBL:KRH69687.1, ECO:0000313|EnsemblPlants:GLYMA02G04790.1};	Acyl-CoA synthetase	GO:0016874,ligase activity; GO:0006631,fatty acid metabolic process	PF00501.28:AMP-binding enzyme
Glyma.02G042500	1	Chr02	3995112	3997537	K20547 basic endochitinase B [EC:3.2.1.14] | (RefSeq) endochitinase (A)	ko00520: Amino sugar and nucleotide sugar metabolism; ko04016: MAPK signaling pathway - plant	chitinase class I precursor [Glycine max]	RecName: Full=Endochitinase; EC=3.2.1.14; Flags: Precursor;	SubName: Full=Chitinase class I {ECO:0000313|EMBL:AAF17593.1}; EC=3.2.1.14 {ECO:0000313|EMBL:AAK01734.1};	Predicted chitinase	GO:0008061,chitin binding; GO:0004568,chitinase activity; GO:0016998,cell wall macromolecule catabolic process; GO:0006032,chitin catabolic process; GO:0006952,defense response; GO:0000272,polysaccharide catabolic process	PF00182.19:Chitinase class I
[truncated: 12,090 more rows]
